# Supplementary material for: Human assembloids recapitulate periportal liver tissue in vitro
Source: Research Square preprint supplement (doi:10.21203/rs.3.rs-5314788/v1), 2025-09-17
Supplement: Supplementary file 1 [file 2a5b281e5b5b4b63a69b5aa4.xlsx]

## Sheet: Supplementary Table Info
Supplementary Dataset 2: RNAseq analysis
Supplementary Dataset 2_S1 - Meta data for all the samples analysed by bulk RNA seq. Related to Fig 2,3 and Extended Data Fig. 2-4,6
Supplementary Dataset 2_S2 - Raw counts for all the samples analysed by bulk RNA seq. Related to Fig 2,3 and Extended Data Fig. 2-4,6
Supplementary Dataset 2_S3 - DEGs between MM+WtnS+TRULI and Primary (fresh isolated PHHs). Related to Extended Data Fig. 2
Supplementary Dataset 2_S4 - Gene set renrichment analysis (GSEA) MM+WntS+TRULI vs Primary (fresh isolated PHHs). KEGG pathway analysis. Related to Extended Data Fig. 2. Not filtered.
Supplementary Dataset 2_S5 - Gene set renrichment analysis (GSEA) MM+WntS+TRULI vs Primary (fresh isolated PHHs). REACTOME pathway analysis. Related to Extended Data Fig. 2. Not filtered.
Supplementary Dataset 2_S6 - Gene lists from publicly available datasets used for Extended Data Fig. 2,3
Supplementary Dataset 2_S7 - DEGs between h-HepOrg cultured in DM vs EM. Related to Fig. 2 and Extended Data Fig. 3.
Supplementary Dataset 2_S8 - Gene set renrichment analysis (GSEA) for h-HepOrg cultured in DM vs EM. KEGG pathway analysis. Related to Fig. 2 and Extended Data Fig. 3. Filtered for p.adjust < 0.05.
Supplementary Dataset 2_S9 - Gene set renrichment analysis (GSEA) between h-HepOrg in DM vs EM. REACTOME pathway analysis used for Fig. 2. Filtered for p.adjust < 0.05.
Supplementary Dataset 2_S10 - Gene set renrichment analysis (GSEA) between h-HepOrg in DM vs EM. Go-terms pathway analysis used for Extended Data Fig. 3. Filtered for p.adjust < 0.05.
Supplementary Dataset 2_S11 - Donor specific genes shown in Heatmap in Fig. 3 (ordered like in the heatmap)

## Sheet: S1_sample metadata
Supplementary Dataset 2_S1 - Meta data for all the samples analysed by bulk RNA seq. Related to Fig 2,3 and Extended Data Fig. 2-4,6
sample	sample_in_group	donor	sex	material	source	cell_type	condition_l1	condition_l2	condition_l3	passage	batch	strandedness	Ext_Data_Fig_2	Fig_2_Ext_Data_Fig_3	Fig_4	Fig_5
hPFs_DSD16	DSD16	DSD16	M	PF	tissue	PF	PF	PF	PF		Y1	unstranded	FALSE	FALSE	TRUE	FALSE
hPFs_DSD21	DSD21	DSD21	F	PF	tissue	PF	PF	PF	PF		Y1	unstranded	FALSE	FALSE	TRUE	FALSE
hPFs_HCC47_Adj	HCC47_Adj	HCC47_Adj	M	PF	tissue	PF	PF	PF	PF		Y1	unstranded	FALSE	FALSE	TRUE	FALSE
hPHHs_13	PHH13	PHH13	F	pHH_primary_cell	tissue	h-Hep	Primary (PHHs)	Primary (PHHs)	Primary (PHHs)		Y1	unstranded	TRUE	FALSE	TRUE	FALSE			Column Name	Description
hPHHs_14	PHH14	PHH14	F	pHH_primary_cell	tissue	h-Hep	Primary (PHHs)	Primary (PHHs)	Primary (PHHs)		Y1	unstranded	TRUE	FALSE	TRUE	FALSE			sample	Unique sample identifier used in the dataset.
hPHHs_16	PHH16	PHH16	F	pHH_primary_cell	tissue	h-Hep	Primary (PHHs)	Primary (PHHs)	Primary (PHHs)		Y1	unstranded	TRUE	FALSE	TRUE	TRUE			sample_in_group	Subsample or replicate ID within a biological group (defined by same donor and condition_l1). Used as sample names in the Heatmaps of Fig. 2 and Extended Data Fig. 3.
hChol.Orgs_13	PHH13	PHH13	F	CHO_organoid	organoid	h-Chol	h-CholOrg	h-CholOrg	h-CholOrg	p3	Y1	unstranded	TRUE	FALSE	TRUE	FALSE			donor	Identifier of the human donor from whom the sample was derived.
hChol.Orgs_14	PHH14	PHH14	F	CHO_organoid	organoid	h-Chol	h-CholOrg	h-CholOrg	h-CholOrg	p3	Y1	unstranded	TRUE	FALSE	TRUE	FALSE			sex	Biological sex of the donor.
hChol.Orgs_16	PHH16	PHH16	F	CHO_organoid	organoid	h-Chol	h-CholOrg	h-CholOrg	h-CholOrg	p3	Y1	unstranded	TRUE	FALSE	TRUE	FALSE			material	Type of biological material used. Categories include: primary hepatocyte, organoid, etc.
hPHH.Orgs_16_Hep.Diff_Wnt	PHH16	PHH16	F	pHH_organoid	organoid	h-Hep	h-HepOrg-DM	DM	Hep.Diff	p7	Y1	unstranded	FALSE	FALSE	FALSE	TRUE			source	Source type of the material. Categories include: tissue, organoid.
hPHH.Orgs_13_p1_MM_WntS_TRULI	PHH13-1	PHH13	F	pHH_organoid	organoid	h-Hep	h-HepOrg-EM	EM	MM_WntS_TRULI	p1	Y1	unstranded	TRUE	FALSE	FALSE	FALSE			cell_type	General cell identity. Categories include:• PF: Portal fibroblast• h-Hep: human hepatocyte• h-Chol: human cholangiocyte
hPHH.Orgs_13_p10_MM_WntS_TRULI	PHH13-2	PHH13	F	pHH_organoid	organoid	h-Hep	h-HepOrg-EM	EM	MM_WntS_TRULI	p10	Y1	unstranded	TRUE	FALSE	FALSE	FALSE			condition_l1	High-level experimental condition. Examples:• PF• Primary (PHHs) – primary human hepatocytes• h-HepOrg-EM – hepatocyte organoids with expansion medium
hPHH.Orgs_13_MM_WntS	PHH13-3	PHH13	F	pHH_organoid	organoid	h-Hep	h-HepOrg-EM	EM	MM_WntS	p1	Y1	unstranded	TRUE	FALSE	FALSE	FALSE			condition_l2	Mid-level refinement, usually indicating whether HepOrgs were grown in EM (Expansion Medium) or DM (Differentiation Medium)
hPHH.Orgs_14_p1_MM_WntS_TRULI	PHH14-1	PHH14	F	pHH_organoid	organoid	h-Hep	h-HepOrg-EM	EM	MM_WntS_TRULI	p1	Y1	unstranded	TRUE	FALSE	FALSE	FALSE			condition_l3	Fine-grained condition details.
hPHH.Orgs_14_p10_MM_WntS_TRULI	PHH14-2	PHH14	F	pHH_organoid	organoid	h-Hep	h-HepOrg-EM	EM	MM_WntS_TRULI	p10	Y1	unstranded	TRUE	FALSE	FALSE	FALSE			passage	Passage number of the cells/organoids if applicable (e.g., p1, p3). Empty if not passaged.
hPHH.Orgs_14_MM_WntS	PHH14-3	PHH14	F	pHH_organoid	organoid	h-Hep	h-HepOrg-EM	EM	MM_WntS	p1	Y1	unstranded	TRUE	FALSE	FALSE	FALSE			batch	Experimental batch ID (e.g., Y1, Y2, S1), indicating different processing or sequencing runs.
hPHH.Orgs_16_p3_MM_WntS_TRULI	PHH16-1	PHH16	F	pHH_organoid	organoid	h-Hep	h-HepOrg-EM	EM	MM_WntS_TRULI	p3	Y1	unstranded	TRUE	FALSE	FALSE	FALSE			strandedness	Indicates strandedness of RNA-seq protocol. Values: unstranded, reverse. See methods.
hPHH.Orgs_16_MM	PHH16-2	PHH16	F	pHH_organoid	organoid	h-Hep	h-HepOrg-EM	EM	MM	p1	Y1	unstranded	TRUE	FALSE	FALSE	FALSE			Ext_Data_Fig_2	Boolean (TRUE/FALSE) indicating whether the sample was used in Extended Data Figure 2.
hPHH.Orgs_16_MM_WntS	PHH16-3	PHH16	F	pHH_organoid	organoid	h-Hep	h-HepOrg-EM	EM	MM_WntS	p1	Y1	unstranded	TRUE	FALSE	FALSE	FALSE			Fig_2_Ext_Data_Fig_3	Boolean indicating usage in Figure 2 or Extended Data Figure 3.
hPHH.Orgs_16_MM_TRULI	PHH16-4	PHH16	F	pHH_organoid	organoid	h-Hep	h-HepOrg-EM	EM	MM_TRULI	p1	Y1	unstranded	TRUE	FALSE	FALSE	FALSE			Fig_4	Boolean indicating sample inclusion in Figure 4.
hPHH.Orgs_16_MM_WntS_TRULI	PHH16-5	PHH16	F	pHH_organoid	organoid	h-Hep	h-HepOrg-EM	EM	MM_WntS_TRULI	p1	Y1	unstranded	TRUE	FALSE	FALSE	FALSE			Fig_5	Boolean indicating if the sample was used in donor preservation-related Figure 5.
hPHH.Orgs_16_Hep.Diff_Cont	PHH16-6	PHH16	F	pHH_organoid	organoid	h-Hep	h-HepOrg-EM	EM	MM_WntS_TRULI	p7	Y1	unstranded	TRUE	FALSE	FALSE	FALSE
F_PHHs_2	F.PHH2	F.PHH2	F	pHH_primary_cell	tissue	h-Hep	Primary (PHHs)	Primary (PHHs)	Primary (PHHs)		Y2	unstranded	TRUE	FALSE	TRUE	FALSE
PHHs_20	PHH20	PHH20	F	pHH_primary_cell	tissue	h-Hep	Primary (PHHs)	Primary (PHHs)	Primary (PHHs)		Y2	unstranded	TRUE	FALSE	TRUE	TRUE
TRULI_HepDiff_20	PHH20	PHH20	F	pHH_organoid	organoid	h-Hep	h-HepOrg-DM	DM	Hep.Diff	p3	Y2	unstranded	FALSE	FALSE	FALSE	TRUE
MM_WntS_TRULI_p3_DSD34	DSD34-1	DSD34	F	pHH_organoid	organoid	h-Hep	h-HepOrg-EM	EM	MM_WntS_TRULI	p3	Y2	unstranded	TRUE	FALSE	FALSE	FALSE
MM_WntS_TDI_p3_DSD34	DSD34-2	DSD34	F	pHH_organoid	organoid	h-Hep	h-HepOrg-EM	EM	MM_WntS_TDI	p3	Y2	unstranded	TRUE	FALSE	FALSE	FALSE
MM_WntS_TRULI_F1	F.PHH1-1	F.PHH1	M	pHH_organoid	organoid	h-Hep	h-HepOrg-EM	EM	MM_WntS_TRULI	p0	Y2	unstranded	TRUE	FALSE	FALSE	FALSE
MM_WntS_TDI_F1	F.PHH1-2	F.PHH1	M	pHH_organoid	organoid	h-Hep	h-HepOrg-EM	EM	MM_WntS_TDI	p0	Y2	unstranded	TRUE	FALSE	FALSE	FALSE
MM_WntS_TRULI_p1_F1	F.PHH1-3	F.PHH1	M	pHH_organoid	organoid	h-Hep	h-HepOrg-EM	EM	MM_WntS_TRULI	p1	Y2	unstranded	TRUE	FALSE	FALSE	FALSE
MM_WntS_TRULI_p3_F1	F.PHH1-4	F.PHH1	M	pHH_organoid	organoid	h-Hep	h-HepOrg-EM	EM	MM_WntS_TRULI	p3	Y2	unstranded	TRUE	FALSE	FALSE	FALSE
MM_WntS_TDI_p3_F1	F.PHH1-5	F.PHH1	M	pHH_organoid	organoid	h-Hep	h-HepOrg-EM	EM	MM_WntS_TDI	p3	Y2	unstranded	TRUE	FALSE	FALSE	FALSE
MM_WntS_F2	F.PHH2-1	F.PHH2	F	pHH_organoid	organoid	h-Hep	h-HepOrg-EM	EM	MM_WntS	p0	Y2	unstranded	TRUE	FALSE	FALSE	FALSE
MM_WntS_TRULI_F2	F.PHH2-2	F.PHH2	F	pHH_organoid	organoid	h-Hep	h-HepOrg-EM	EM	MM_WntS_TRULI	p0	Y2	unstranded	TRUE	FALSE	FALSE	FALSE
MM_WntS_TDI_F2	F.PHH2-3	F.PHH2	F	pHH_organoid	organoid	h-Hep	h-HepOrg-EM	EM	MM_WntS_TDI	p0	Y2	unstranded	TRUE	FALSE	FALSE	FALSE
MM_WntS_TRULI_p1_F2	F.PHH2-4	F.PHH2	F	pHH_organoid	organoid	h-Hep	h-HepOrg-EM	EM	MM_WntS_TRULI	p1	Y2	unstranded	TRUE	FALSE	FALSE	FALSE
MM_WntS_TRULI_p3_F2	F.PHH2-5	F.PHH2	F	pHH_organoid	organoid	h-Hep	h-HepOrg-EM	EM	MM_WntS_TRULI	p3	Y2	unstranded	TRUE	FALSE	FALSE	FALSE
MM_WntS_TDI_p3_F2	F.PHH2-6	F.PHH2	F	pHH_organoid	organoid	h-Hep	h-HepOrg-EM	EM	MM_WntS_TDI	p3	Y2	unstranded	TRUE	FALSE	FALSE	FALSE
MM_19	PHH19-1	PHH19	M	pHH_organoid	organoid	h-Hep	h-HepOrg-EM	EM	MM	p0	Y2	unstranded	TRUE	FALSE	FALSE	FALSE
MM_WntS_TRULI_19	PHH19-2	PHH19	M	pHH_organoid	organoid	h-Hep	h-HepOrg-EM	EM	MM_WntS_TRULI	p0	Y2	unstranded	TRUE	FALSE	FALSE	FALSE
MM_WntS_TDI_19	PHH19-3	PHH19	M	pHH_organoid	organoid	h-Hep	h-HepOrg-EM	EM	MM_WntS_TDI	p0	Y2	unstranded	TRUE	FALSE	FALSE	FALSE
MM_WntS_TRULI_p1_19	PHH19-4	PHH19	M	pHH_organoid	organoid	h-Hep	h-HepOrg-EM	EM	MM_WntS_TRULI	p1	Y2	unstranded	TRUE	FALSE	FALSE	FALSE
MM_WntS_TRULI_p3_19	PHH19-5	PHH19	M	pHH_organoid	organoid	h-Hep	h-HepOrg-EM	EM	MM_WntS_TRULI	p3	Y2	unstranded	TRUE	FALSE	FALSE	FALSE
MM_WntS_TDI_p3_19	PHH19-6	PHH19	M	pHH_organoid	organoid	h-Hep	h-HepOrg-EM	EM	MM_WntS_TDI	p3	Y2	unstranded	TRUE	FALSE	FALSE	FALSE
MM_20	PHH20-1	PHH20	F	pHH_organoid	organoid	h-Hep	h-HepOrg-EM	EM	MM	p0	Y2	unstranded	TRUE	FALSE	FALSE	FALSE
MM_WntS_20	PHH20-2	PHH20	F	pHH_organoid	organoid	h-Hep	h-HepOrg-EM	EM	MM_WntS	p0	Y2	unstranded	TRUE	FALSE	FALSE	FALSE
MM_WntS_TRULI_20	PHH20-3	PHH20	F	pHH_organoid	organoid	h-Hep	h-HepOrg-EM	EM	MM_WntS_TRULI	p0	Y2	unstranded	TRUE	FALSE	FALSE	FALSE
MM_WntS_TDI_20	PHH20-4	PHH20	F	pHH_organoid	organoid	h-Hep	h-HepOrg-EM	EM	MM_WntS_TDI	p0	Y2	unstranded	TRUE	FALSE	FALSE	FALSE
MM_WntS_TRULI_p1_20	PHH20-5	PHH20	F	pHH_organoid	organoid	h-Hep	h-HepOrg-EM	EM	MM_WntS_TRULI	p1	Y2	unstranded	TRUE	FALSE	FALSE	FALSE
MM_WntS_TRULI_p3_20	PHH20-6	PHH20	F	pHH_organoid	organoid	h-Hep	h-HepOrg-EM	EM	MM_WntS_TRULI	p3	Y2	unstranded	TRUE	FALSE	FALSE	FALSE
MM_WntS_TDI_p3_20	PHH20-7	PHH20	F	pHH_organoid	organoid	h-Hep	h-HepOrg-EM	EM	MM_WntS_TDI	p3	Y2	unstranded	TRUE	FALSE	FALSE	FALSE
hPHH_34_DSD42_cells	DSD42	DSD42	M	pHH_primary_cell	tissue	h-Hep	Primary (PHHs)	Primary (PHHs)	Primary (PHHs)		S1	reverse	FALSE	TRUE	FALSE	FALSE
hPHH_36_DSD43_cells	DSD43	DSD43	M	pHH_primary_cell	tissue	h-Hep	Primary (PHHs)	Primary (PHHs)	Primary (PHHs)		S1	reverse	FALSE	TRUE	FALSE	FALSE
hPHH_33_PHH2_cells	PHH2-1	PHH2	F	pHH_primary_cell	tissue	h-Hep	Primary (PHHs)	Primary (PHHs)	Primary (PHHs)		S1	reverse	FALSE	TRUE	FALSE	TRUE
hPHH_35_PHH24_cells	PHH24	PHH24	F	pHH_primary_cell	tissue	h-Hep	Primary (PHHs)	Primary (PHHs)	Primary (PHHs)		S1	reverse	FALSE	TRUE	FALSE	FALSE
hPHH_31_DSD39_ChO	DSD39	DSD39	M	CHO_organoid	organoid	h-Chol	h-CholOrg	h-CholOrg	h-CholOrg	p3	S1	reverse	FALSE	TRUE	FALSE	FALSE
hPHH_30_DSD42__ChO	DSD42	DSD42	M	CHO_organoid	organoid	h-Chol	h-CholOrg	h-CholOrg	h-CholOrg	p3	S1	reverse	FALSE	TRUE	FALSE	FALSE
hPHH_29_PHH2_ChO	PHH2	PHH2	F	CHO_organoid	organoid	h-Chol	h-CholOrg	h-CholOrg	h-CholOrg	p3	S1	reverse	FALSE	TRUE	FALSE	FALSE
hPHH_32_PHH31_ChO	PHH31	PHH31	F	CHO_organoid	organoid	h-Chol	h-CholOrg	h-CholOrg	h-CholOrg	p2	S1	reverse	FALSE	TRUE	FALSE	FALSE
hPHH_5__PHH2_HO_C1_C1_5d_DM_7d	PHH2-1	PHH2	F	pHH_organoid	organoid	h-Hep	h-HepOrg-DM	EM1_DM	EM1_EM1_5d_DM_7d	p1	S1	reverse	FALSE	TRUE	FALSE	TRUE
hPHH_17__PHH2_HO_C5_C1_2d_DM_7d	PHH2-2	PHH2	F	pHH_organoid	organoid	h-Hep	h-HepOrg-DM	EM2_EM1_DM	EM2_EM1_2d_DM_7d	p1	S1	reverse	FALSE	TRUE	FALSE	FALSE
hPHH_20__PHH2_HO_C5_C1_5d_DM_7d	PHH2-3	PHH2	F	pHH_organoid	organoid	h-Hep	h-HepOrg-DM	EM2_EM1_DM	EM2_EM1_5d_DM_7d	p1	S1	reverse	FALSE	TRUE	FALSE	FALSE
hPHH_23__PHH2_HO_C5_C1_7d_C1_2d_DM_7d	PHH2-4	PHH2	F	pHH_organoid	organoid	h-Hep	h-HepOrg-DM	EM2_EM1_DM	EM2_EM1_7d_EM1_2d_DM_7d	p2	S1	reverse	FALSE	TRUE	FALSE	FALSE
hPHH_26__PHH2_HO_C5_C1_7d_C1_5d_DM_7d	PHH2-5	PHH2	F	pHH_organoid	organoid	h-Hep	h-HepOrg-DM	EM2_EM1_DM	EM2_EM1_7d_EM1_5d_DM_7d	p2	S1	reverse	FALSE	TRUE	FALSE	FALSE
hPHH_6__PHH3_HO_C1_C1_5d_DM_7d	PHH3-1	PHH3	M	pHH_organoid	organoid	h-Hep	h-HepOrg-DM	EM1_DM	EM1_EM1_5d_DM_7d	p1	S1	reverse	FALSE	TRUE	FALSE	TRUE
hPHH_18__PHH3_HO_C5_C1_2d_DM_7d	PHH3-2	PHH3	M	pHH_organoid	organoid	h-Hep	h-HepOrg-DM	EM2_EM1_DM	EM2_EM1_2d_DM_7d	p1	S1	reverse	FALSE	TRUE	FALSE	FALSE
hPHH_21__PHH3_HO_C5_C1_5d_DM_7d	PHH3-3	PHH3	M	pHH_organoid	organoid	h-Hep	h-HepOrg-DM	EM2_EM1_DM	EM2_EM1_5d_DM_7d	p1	S1	reverse	FALSE	TRUE	FALSE	FALSE
hPHH_24__PHH3_HO_C5_C1_7d_C1_2d_DM_7d	PHH3-4	PHH3	M	pHH_organoid	organoid	h-Hep	h-HepOrg-DM	EM2_EM1_DM	EM2_EM1_7d_EM1_2d_DM_7d	p2	S1	reverse	FALSE	TRUE	FALSE	FALSE
hPHH_27__PHH3_HO_C5_C1_7d_C1_5d_DM_7d	PHH3-5	PHH3	M	pHH_organoid	organoid	h-Hep	h-HepOrg-DM	EM2_EM1_DM	EM2_EM1_7d_EM1_5d_DM_7d	p2	S1	reverse	FALSE	TRUE	FALSE	FALSE
hPHH_7_PHH31_HO_C1_C1_5d_DM_7d	PHH31	PHH31	F	pHH_organoid	organoid	h-Hep	h-HepOrg-DM	EM1_DM	EM1_EM1_5d_DM_7d	p1	S1	reverse	FALSE	TRUE	FALSE	FALSE
hPHH_19__PHH4_HO_C5_C1_2d_DM_7d	PHH4-1	PHH4	F	pHH_organoid	organoid	h-Hep	h-HepOrg-DM	EM2_EM1_DM	EM2_EM1_2d_DM_7d	p1	S1	reverse	FALSE	TRUE	FALSE	FALSE
hPHH_22__PHH4_HO_C5_C1_5d_DM_7d	PHH4-2	PHH4	F	pHH_organoid	organoid	h-Hep	h-HepOrg-DM	EM2_EM1_DM	EM2_EM1_5d_DM_7d	p1	S1	reverse	FALSE	TRUE	FALSE	FALSE
hPHH_25__PHH4_HO_C5_C1_7d_C1_2d_DM_7d	PHH4-3	PHH4	F	pHH_organoid	organoid	h-Hep	h-HepOrg-DM	EM2_EM1_DM	EM2_EM1_7d_EM1_2d_DM_7d	p2	S1	reverse	FALSE	TRUE	FALSE	FALSE
hPHH_28__PHH4_HO_C5_C1_7d_C1_5d_DM_7d	PHH4-4	PHH4	F	pHH_organoid	organoid	h-Hep	h-HepOrg-DM	EM2_EM1_DM	EM2_EM1_7d_EM1_5d_DM_7d	p2	S1	reverse	FALSE	TRUE	FALSE	FALSE
hPHH_8__PHH2_HO_C1_C1_5d_C1_7d	PHH2-1	PHH2	F	pHH_organoid	organoid	h-Hep	h-HepOrg-EM	EM1	EM1_EM1_5d_EM1_7d	p1	S1	reverse	FALSE	TRUE	FALSE	FALSE
hPHH_14__PHH2_HO_C5_C5_5d_C5_7d	PHH2-2	PHH2	F	pHH_organoid	organoid	h-Hep	h-HepOrg-EM	EM2	EM2_EM2_5d_EM2_7d	p1	S1	reverse	FALSE	TRUE	FALSE	FALSE
hPHH_9__PHH3_HO_C1_C1_5d_C1_7d	PHH3-1	PHH3	M	pHH_organoid	organoid	h-Hep	h-HepOrg-EM	EM1	EM1_EM1_5d_EM1_7d	p1	S1	reverse	FALSE	TRUE	FALSE	FALSE
hPHH_15__PHH3_HO_C5_C5_5d_C5_7d	PHH3-2	PHH3	M	pHH_organoid	organoid	h-Hep	h-HepOrg-EM	EM2	EM2_EM2_5d_EM2_7d	p1	S1	reverse	FALSE	TRUE	FALSE	FALSE
hPHH_10_PHH31_HO_C1_C1_5d_C1_7d	PHH31	PHH31	F	pHH_organoid	organoid	h-Hep	h-HepOrg-EM	EM1	EM1_EM1_5d_EM1_7d	p1	S1	reverse	FALSE	TRUE	FALSE	FALSE
hPHH_16__PHH4_HO_C5_C5_5d_C5_7d	PHH4	PHH4	F	pHH_organoid	organoid	h-Hep	h-HepOrg-EM	EM2	EM2_EM2_5d_EM2_7d	p1	S1	reverse	FALSE	TRUE	FALSE	FALSE
hPHH2_4_DSD48_cells	DSD48	DSD48	M	pHH_primary_cell	tissue	h-Hep	Primary (PHHs)	Primary (PHHs)	Primary (PHHs)		S2	reverse	FALSE	TRUE	FALSE	TRUE
hPHH2_5_DSD49_cells	DSD49	DSD49	F	pHH_primary_cell	tissue	h-Hep	Primary (PHHs)	Primary (PHHs)	Primary (PHHs)		S2	reverse	FALSE	TRUE	FALSE	TRUE
hPHH2_1_PHH2_cells	PHH2-2	PHH2	F	pHH_primary_cell	tissue	h-Hep	Primary (PHHs)	Primary (PHHs)	Primary (PHHs)		S2	reverse	FALSE	TRUE	FALSE	FALSE
hPHH2_2_PHH3_cells	PHH3	PHH3	M	pHH_primary_cell	tissue	h-Hep	Primary (PHHs)	Primary (PHHs)	Primary (PHHs)		S2	reverse	FALSE	TRUE	FALSE	TRUE
hPHH2_3_PHH37_cells	PHH37	PHH37	M	pHH_primary_cell	tissue	h-Hep	Primary (PHHs)	Primary (PHHs)	Primary (PHHs)		S2	reverse	FALSE	TRUE	FALSE	FALSE
hPHH2_22_DSD48_ChO	DSD48	DSD48	M	CHO_organoid	organoid	h-Chol	h-CholOrg	h-CholOrg	h-CholOrg	p2	S2	reverse	FALSE	TRUE	FALSE	FALSE
hPHH2_23_DSD49_ChO	DSD49	DSD49	F	CHO_organoid	organoid	h-Chol	h-CholOrg	h-CholOrg	h-CholOrg		S2	reverse	FALSE	TRUE	FALSE	FALSE
hPHH2_26_PHH37_ChO	PHH37	PHH37	M	CHO_organoid	organoid	h-Chol	h-CholOrg	h-CholOrg	h-CholOrg	p2	S2	reverse	FALSE	TRUE	FALSE	FALSE
hPHH2_19_DSD48_HO_C1_2d_DM_7d	DSD48	DSD48	M	pHH_organoid	organoid	h-Hep	h-HepOrg-DM	EM2_EM1_DM	EM2_9d_EM1_2d_DM_7d	p4	S2	reverse	FALSE	TRUE	FALSE	TRUE
hPHH2_20_DSD49_HO_C1_2d_DM_7d	DSD49	DSD49	F	pHH_organoid	organoid	h-Hep	h-HepOrg-DM	EM2_EM1_DM	EM2_9d_EM1_2d_DM_7d	p4	S2	reverse	FALSE	TRUE	FALSE	TRUE
hPHH2_17_PHH2_HO_C1_2d_DM_7d	PHH2-6	PHH2	F	pHH_organoid	organoid	h-Hep	h-HepOrg-DM	EM2_EM1_DM	EM2_9d_EM1_2d_DM_7d	p2	S2	reverse	FALSE	TRUE	FALSE	FALSE
hPHH2_18_PHH3_HO_C1_2d_DM_7d	PHH3-6	PHH3	M	pHH_organoid	organoid	h-Hep	h-HepOrg-DM	EM2_EM1_DM	EM2_9d_EM1_2d_DM_7d	p2	S2	reverse	FALSE	TRUE	FALSE	FALSE
hPHH2_14_DSD48_HO_C5_9d	DSD48	DSD48	M	pHH_organoid	organoid	h-Hep	h-HepOrg-EM	EM2	EM2_9d	p2	S2	reverse	FALSE	TRUE	FALSE	FALSE
hPHH2_15_DSD49_HO_C5_9d	DSD49	DSD49	F	pHH_organoid	organoid	h-Hep	h-HepOrg-EM	EM2	EM2_9d	p2	S2	reverse	FALSE	TRUE	FALSE	FALSE
hPHH2_12_PHH2_HO_C5_9d	PHH2-3	PHH2	F	pHH_organoid	organoid	h-Hep	h-HepOrg-EM	EM2	EM2_9d	p2	S2	reverse	FALSE	TRUE	FALSE	FALSE
hPHH2_13_PHH3_HO_C5_9d	PHH3-3	PHH3	M	pHH_organoid	organoid	h-Hep	h-HepOrg-EM	EM2	EM2_9d	p2	S2	reverse	FALSE	TRUE	FALSE	FALSE
hPHH2_16_PHH37_HO_C5_9d	PHH37	PHH37	M	pHH_organoid	organoid	h-Hep	h-HepOrg-EM	EM2	EM2_9d	p2	S2	reverse	FALSE	TRUE	FALSE	FALSE
hPHH2_9_DSD48_monol	DSD48	DSD48	M	monolayer	monolayer	h-Hep	monolayer	monolayer	monolayer		S2	reverse	FALSE	TRUE	FALSE	FALSE
hPHH2_10_DSD49_monol	DSD49	DSD49	F	monolayer	monolayer	h-Hep	monolayer	monolayer	monolayer		S2	reverse	FALSE	TRUE	FALSE	FALSE
hPHH2_7_PHH2_monol	PHH2	PHH2	F	monolayer	monolayer	h-Hep	monolayer	monolayer	monolayer		S2	reverse	FALSE	TRUE	FALSE	FALSE
hPHH2_8_PHH3_monol	PHH3	PHH3	M	monolayer	monolayer	h-Hep	monolayer	monolayer	monolayer		S2	reverse	FALSE	TRUE	FALSE	FALSE

## Sheet: S2_raw counts all samples
Supplementary Dataset 2_S2 - Raw counts for all the samples analysed by bulk RNA seq. Related to Fig 2,3 and Extended Data Fig. 2-4,6
gene	hPFs_DSD16	hPFs_DSD21	hPFs_HCC47_Adj	hPHHs_13	hPHHs_14	hPHHs_16	hChol.Orgs_13	hChol.Orgs_14	hChol.Orgs_16	hPHH.Orgs_16_Hep.Diff_Wnt	hPHH.Orgs_13_p1_MM_WntS_TRULI	hPHH.Orgs_13_p10_MM_WntS_TRULI	hPHH.Orgs_13_MM_WntS	hPHH.Orgs_14_p1_MM_WntS_TRULI	hPHH.Orgs_14_p10_MM_WntS_TRULI	hPHH.Orgs_14_MM_WntS	hPHH.Orgs_16_p3_MM_WntS_TRULI	hPHH.Orgs_16_MM	hPHH.Orgs_16_MM_WntS	hPHH.Orgs_16_MM_TRULI	hPHH.Orgs_16_MM_WntS_TRULI	hPHH.Orgs_16_Hep.Diff_Cont	F_PHHs_2	PHHs_20	TRULI_HepDiff_20	MM_WntS_TRULI_p3_DSD34	MM_WntS_TDI_p3_DSD34	MM_WntS_TRULI_F1	MM_WntS_TDI_F1	MM_WntS_TRULI_p1_F1	MM_WntS_TRULI_p3_F1	MM_WntS_TDI_p3_F1	MM_WntS_F2	MM_WntS_TRULI_F2	MM_WntS_TDI_F2	MM_WntS_TRULI_p1_F2	MM_WntS_TRULI_p3_F2	MM_WntS_TDI_p3_F2	MM_19	MM_WntS_TRULI_19	MM_WntS_TDI_19	MM_WntS_TRULI_p1_19	MM_WntS_TRULI_p3_19	MM_WntS_TDI_p3_19	MM_20	MM_WntS_20	MM_WntS_TRULI_20	MM_WntS_TDI_20	MM_WntS_TRULI_p1_20
TSPAN6	2057	3039	2662	3794	2266	2742	4577	3552	2370	4386	8958	13389	3600	7611	8044	4333	7335	3703	4095	3859	5681	6872	4576	4872	9839	10719	14111	8196	17479	10445	13748	10610	2658	15183	6815	12619	16599	17821	7794	10689	3987	4655	12329	12939	7068	5779	5808	11125	10435
TNMD	0	1	0	1	0	0	0	0	0	0	0	0	0	0	5	0	0	0	1	0	1	0	0	0	1	1	1	0	0	0	0	0	0	0	0	1	0	0	0	0	0	0	0	0	0	1	0	0	0
DPM1	2114	2072.77	1969.23	908.468	785	785	1264	1008.46	1974.29	2137.53	1572.66	2710.96	1706.2	1962.07	2336.51	1584.2	2285	1784.36	2010.33	1742.88	2150.47	2323.42	1033	1778	1772.32	2213.68	4075.67	2944.75	2221.36	2448.06	1963.02	2162.71	1063.6	1590.47	1932.28	1404.92	1979.34	2367.75	3507.2	2720.25	1391.95	1709.92	2365.38	2478.57	3009.51	2953.8	3485.54	3113.95	2317.76
SCYL3	432.388	683.989	348.741	358.681	228.814	366.66	540.534	308.528	501.042	590.745	703.084	749.481	300.884	570.743	587.157	477.105	637.877	292.927	374.163	478.478	395.936	574.711	510.077	620.011	903.807	766.299	710.795	592.9	464.211	461.113	628.449	452.718	240.726	281.882	382.544	199.928	416.838	293.379	739.208	652.26	442.141	431.228	821.278	525.17	727.778	674.118	519.217	440.689	469.073
FIRRM	136.611	252.01	118.26	69.319	64.186	47.341	131.465	91.472	359.674	105.255	215.916	297.637	155.115	417.826	319.842	204.895	340.122	180.074	260.837	238.522	325.064	217.289	174.924	323.99	107.227	402.702	771.205	829.1	562.79	671.886	575.551	455.284	115.275	94.118	120.457	77.071	353.162	308.645	241.792	451.739	55.86	208.772	399.723	581.831	157.235	131.882	968.785	283.311	216.928
FGR	3	1	5	13	32	14	0	0	0	6	1	2	6	5	2	5	7	13	9	16	9	1	10	122	1	1	4	2	0	5	0	1	4	3	4	2	2	2	57	3	8	8	2	3	20	23	3	6	14
CFH	15983.1	10442.4	9395.26	34175.2	28074.4	27458.9	40.357	508.508	192.17	26533.2	20288.5	7679.46	9988.6	8103.35	9256.28	2259.72	25849.6	14775.2	19777.6	27291	13259.3	20219.9	76616	73328	34589.1	25712.9	3785.53	7287.28	5755.78	4822.23	10601.3	1850.31	18306.3	14561.6	18499.8	7099.65	9789.18	9931.15	52403.8	8277.93	34464.9	20694.9	16813.4	6961.69	32293.4	24200.1	6198.41	14128.3	14352.7
FUCA2	7126.31	10663.7	11636.1	1438.34	949.546	1266.45	8025.94	8240.72	18100.9	11045	15002.8	16539.2	11651.8	14100.1	24812.5	11093.6	17118.7	17717.3	17853.3	17765.6	16870.8	18292.4	1447.56	3801.21	15356.7	25125.2	24122.7	22725.8	14232.1	13239.6	13193	10362.8	8245.91	9419.39	16064	7233.59	12342.7	13663.2	42116.9	22715.2	11861.8	11601.3	21794.9	17698.3	62561.7	37728.5	26736.8	14590.8	18677.2
GCLC	725.001	293	614.001	3194	2223	2200	1870	737.999	1083	1662	660.001	399.999	1058	580	460.001	592	661.998	973.999	1306.99	672.99	627.989	907	4220	4810	1807	742	611.999	1036	1182	490.001	1035	549	1213	817	2565.33	355	517.001	629.999	6372.99	2737	811.991	405	688	463.001	6573.99	3396	1868	777.001	476.001
NFYA	414.156	253.97	399	180	158	213	562	577	633	568.005	769.836	847.552	439.66	844.387	681.99	744.88	818	477	678	579	687	763.71	272.485	368	789.944	957.984	1023.91	610.767	866.761	383.971	861	648.222	318.7	337.998	594.768	399.882	415	388.928	1132	1153.91	680.972	670.837	595.839	698.955	888.823	1024.32	867.978	765.37	462.92
STPG1	341.03	866.523	560.032	14	37	18	111.012	271.001	261.274	130.364	251.103	163.322	118.255	484.073	211.498	310.468	211.026	100.217	144	166.38	219.259	146.069	39	52	161	222.107	933.479	326	445.151	346	172.999	952.246	68.999	144	174.008	160.063	291	328.056	203.152	476	113.753	185	275.756	515.337	190.272	168	331.027	495.215	283.167
NIPAL3	3018.97	7195.47	5751.97	53	64	102.001	2630.99	1957	2014.73	610.636	806.898	1401.68	780.745	1529.93	861.502	1268.53	1235.97	515.783	681	700.62	574.74	1147.93	190.001	298	627.001	1525.89	3575.52	568	1151.85	490	651	3497.75	252.001	357	533.993	690.937	732.999	842.944	689.847	871.001	310.247	454	674.245	1014.66	757.727	609.999	584.974	1275.79	574.834
LAS1L	1889	2473	2451	723.999	576	762.001	1439	1199	2481	1396	2780	2811	1034	3278	2829	1249	3008	1240	1520	1765	2363	2249	730.001	1620	2249	3788	7000	5700	5516	4700	4516	4093	973.999	2868	3118	2252	5226	4975	3398	5263	1276	1813	5109	4879	2883	2152	6144	2936	3706
ENPP4	91	348	61	127	143	103	966	1200	882	413	657	1231	593	1410	893	1194	724	574	665	658	543	650	265	289	770	1431	1397	357	663	294	457	582	212	391	275	383	456	579	1105	416	588	580	564	726	692	547	667	437	339
SEMA3F	28	12	31	12	46	8	247	85	196.001	33	38	47	32	49	59.001	19	45	20	29	23	47.999	65	19	35	31	47	77.999	137	251	57	65	264	21	44	70	51	55	61	36	182	35	37	84	33	48	37	52	126.001	85
CFTR	6.001	3	39	18	32	7	667.999	1763	1559	117.001	220.998	254.001	1295	2846	555	4460	626.001	611.001	759	905	198.001	93	0	160	82	723	2535	14	218	36	118	779.001	3	79.999	5	72	147.001	106.001	56	15	44.968	9	87	139.999	18	77	12	254.999	161
ANKIB1	3943	2300.86	5160.68	231	196	210	812	567	602.38	679.556	517	362	414	766.001	313	569	374	313	403	423	477	604.999	570	634	719.998	516	903	681	1781	641	972	1248	278	521	376	915	910	825.999	678.058	892	498	486	641	611	856.292	758	588.998	1547	621
CYP51A1	3118.03	7008.26	3135.97	2506	2973.74	2209.9	6118.79	10066.6	14452.6	9134.78	13201.5	13579.4	4614.98	16874.9	13433.6	13560.4	18514.7	10468.3	9943	10786.8	13148.7	11308.5	2007.43	3953	16392.8	22063.4	32114.7	15329.1	11605.1	8952.66	8284	10465.1	7003.15	4416.06	12044.4	4168.54	6904.24	7798.86	23882.8	12026.2	9824.93	7964.75	13567.7	17126.9	21646.6	14772.2	20262.2	12230	8220.61
KRIT1	1201.3	1138.01	1349.06	330.894	388.968	325.996	600.471	393.58	500.764	936.952	634.539	659.62	427.427	690.397	608.591	570.402	640.533	373.49	477.316	479.147	494.327	815.129	769.332	965.721	984.691	958.767	1265.97	711.539	1045.04	586.672	784.066	840.584	742.73	462.488	626.986	409.736	659.06	635.359	1141.01	818.779	762.657	928.142	820.591	821.398	1047.77	1394.79	777.507	1142.02	734.028
RAD52	208	157.035	181	47	54	64	140.001	125.061	137.999	222	238.001	381.518	140.002	334	362.473	241.999	206	133	122.174	152.999	230.217	241.001	157	134	188.069	288.03	523.491	389.162	495.022	357.734	296.069	468.245	157.001	260.001	212.1	331.154	338.084	279.999	266	293.038	179.048	388.022	292.01	343.03	314.999	380.999	481.127	713.035	302.015
MYH16	0	0	2.166	0	0	0	7.516	6	1	2	3	0	0	12.047	0	1	7.644	4.26	4	0	2	2	1	0	0	1	8.39	0	3	6	2	4	0	0	0	0	2	1	1	8	4	1	1.95	2	0	2	2	0	2
BAD	2593.92	5110.47	5910.5	1644.59	1609.45	1231.28	946.937	1472.97	2584.69	1792.45	2120.87	1797.2	1116.87	2749.76	1972.67	1723.18	1478.49	1343.83	1485.2	1423.61	1651.37	1532.53	2899.91	3151.8	2226.56	1964.71	3672.51	2812.68	4171.15	2858.84	2120.89	3528.67	917.051	3092.68	2535.99	2793.9	2782.78	2809.67	2646.72	2787.81	1484.96	1411.58	3128.76	2676.63	3372.36	2541.6	2077.63	3485.82	2595.69
LAP3	2882	4308.98	4804.99	4424	3233	5672.99	3831	2430	4295.99	7429.98	4342	6741.99	4319	3767	7493.97	3362.98	7109.99	6101	7384.97	5864.94	5061.99	7077	6550	8264.99	11148	8860	8979.99	7519.99	5414	6268.99	8567	3198	3979	7460	9626.99	4486	8441.99	9461	15004	8387	5025	3001	9614.99	6483	13101	9365.98	8803	4590.99	6963
CD99_ENSG00000002586	15657.7	28257.8	31868.1	3256.1	2819.31	3117.03	1869.05	3558.14	4785.79	4648.57	2817.55	1512.73	5231.37	4434.67	2675.17	6361.98	3543.43	5714.01	7096.67	4516.41	4232.73	3037.74	4872.62	6530.47	5808.67	3372.11	6509.77	6318.68	6547.85	6003.16	4638.16	4852.68	3761.23	4031.64	8645.61	3626.11	3474.25	5299.4	16604.2	6668.37	3758.86	3192.82	5646.71	4180.96	25503.9	19471.1	7406.15	5685.73	4581.67
HS3ST1	4	0	33	3	10	8	2784	2588	2745	19	58	152	800	1055	860	1575	90	247	420	418	79	31	2	52	28	902	2543	1	5	9	10	17	4	1	0	1	1	4	87	14	10	12	6	12	17	48	23	24	76
AOC1	3	1	2	0	323	319.999	264	208	181	15	2	59	4	9	452	3	6	25	27	12	9	2	4	180	6	225	6	1	0	1	1	3	3	2	2	0	1	0	37	4	12	9	3	3	30	24	1	4	5
WNT16	3	1	2	0	7	3	0	2	0	0	1	0	4	2	3	5	1	3	3	2	0	2	8	1	3	2	1	2	2	4	4	13	0	1	2	1	0	1	13	0	5	7	0	1	16	4	2	4	0
HECW1	34	8	40	2	14	3	1	0	3	25	5	9.342	19	16	6	20	27	20	12	13	10	12	3	10	3	4	8.629	15.002	8	7.221	15	9	22	5	11	7	6	9	26	2	17	18	3	8	24	12	2	17.992	8
MAD1L1	908	1790.26	1685.34	1004.02	1082.09	680.867	222.886	488.793	1003.98	655.108	950.674	1661.92	425.301	1152.24	1462.76	512.442	1076.36	470.526	512.088	639.862	898.843	982.143	807.799	639.214	795.424	1283.96	2736.14	2174.12	1097.76	1380.59	769.88	1490.76	287.176	756.981	797.399	370.915	705.421	897.985	748.359	1759.32	501.318	693.912	1618.57	2083.3	803.536	779.435	1113.86	1005.63	1013.49
LASP1	10847	8301.14	15126.8	1299.84	936.527	1837.04	2258.5	3324.48	5514.53	6017.82	5886.4	10474.8	6789.79	6564.77	7233.72	8135.43	10536.8	5644.54	7445.06	7397.93	8368.78	6442.83	2979.04	5278.25	6702.42	6935.33	11350.2	7490.69	5020.24	4254.44	5066.71	5131.11	3110.88	2366.62	6102.71	2934.9	3752.34	5536.71	13583.3	5961.89	3535.63	2528.12	5000.62	6790.64	16094.9	10970.4	7027.51	9669.36	6050.27
SNX11	484	1898	1036	195.999	158	178	106	451.001	646	627	652	1018	643.999	753	837	624	749	553	610	581	625	711.999	377	521.001	1130.14	1061	1556	939.999	629	732	544.999	716.998	377	490.999	931.999	302.001	618.999	812.001	1779	1457.23	281	333.783	924.999	851	1684	1217	1288	839	867.999
TMEM176A	1	3	261.999	19349	22028	20754	1322	1764	509	3736	5633	141	8910	6823	5911	4365	5247	14105	17664	8672	6291	2586	51198	51893	2384	5590	1117	1870	749.001	2244	1170	200	18720	16928	27846	7130	6236	6464	42795	7485	8672	4520	7192	2073	26120	22841	2756	5744	6496
M6PR	3984.71	10405.6	6404.36	954.238	726.977	1091.99	2499.1	4044.23	5903.88	3653.28	8911.45	11285.9	4608.94	11454.9	12193.2	5972.39	11067.5	5329.22	5155.53	5940.22	8191.88	7426.76	1204.88	3022.35	6053.11	12992.4	23101.5	18710.1	16832.4	17065.7	15116.5	13591.9	2455.5	6637.59	7866.29	3762.22	14121.5	10298.2	13485.9	19345.1	5678.92	6368.93	17710.4	16837.1	14470.3	12526.2	17177.2	12874	13291.3
KLHL13	582	1597.55	1124	37	47	59	2	17	19	164	115	104	118	65	187	18	216	125	153	96.999	100	296	89	117	162	169	84	131	141	61	35	35	209	145	401	89	63	59	418	128	249	86	152	143	355	597	164.001	152	70
CYP26B1	81	139	50	3	24	2	3	2	1	5	3	53	0	13	53	10	8	1	1	2	2	10	0	11	5	9	23	6	20	10	9	46	2	2	0	7	2	14	11	23	4	9	7	5	49	18	9	2	10
ICA1	4	9	71	312.08	161	17	3475.39	1538.21	1977.21	293.682	1143.88	1715.9	633.078	2068.54	1257.58	1309.22	263	256.999	297.693	388.943	133	304.344	73	60.999	310	1904.67	3532	257.999	778.001	580.999	826	2194	71	176	153.001	622.999	977	926.999	118.999	57.001	50	62	108.998	352	37	51.001	53	198	168
DBNDD1	19.001	54	58	6	21	19	34	226.001	415.001	1273	296	243	571	497.999	97.999	872.999	157	306.999	681	467.001	221	203	133	80	901.001	354	621.999	194	157	178	118	92	355.001	176	224.001	99.001	140	152	352.001	115	155	94	126	145	401.001	239	445	235	220
ALS2	676	715	859.999	390	385.003	669.999	622	531.002	598.001	991	917	1180	537.999	1148	730.001	771.715	1142	676.001	824.001	883	1059	823.63	946.001	1092	1008	943.999	1543	868.999	1425	756	977.998	1223	562	548	748.001	461.002	724	770.998	1203.3	1242	690.999	761.183	895	970.001	1413	1482	933	1081	643
CASP10	176	283	306.001	81	94	104	249	167	317	340.001	367	642	253.001	477.816	535.001	419.999	545.999	321.999	339.575	362.001	331.681	399.999	161.999	277	381.001	579.001	1085	315	304	248.999	309	251	151.001	96	176.001	133	190.999	198	652	248.999	232	238.999	302.001	356.001	640	518.999	454.998	364.999	280.999
CFLAR	2789.35	2897.66	2530.17	1638.72	1062.72	1198.31	3763.42	2649.49	2394.55	3003.92	3431.91	4787.92	1913.66	3214.61	3379.98	2153.83	3734.05	1426.58	1638.21	2150.64	3334.44	5011.18	2279.06	2707.96	3414.43	6270.95	8882.05	3916.87	4813.2	3739.48	4864.66	4582.43	1202	1813.58	2162.7	4908.15	5076.99	3820	4405.19	5230.49	2528.75	4300.09	7082.02	3647.32	4513.7	4120.53	4103.55	3548.06	4525.43
TFPI	11554.1	13756.9	8153.74	6520.85	5703.58	5118.08	3207	2757	1544.64	12139.3	19719.6	14207.9	8416.9	10357.8	21778	2206.85	27610.8	10394.4	11322.9	15088	22360.6	19797	8505.79	8924.75	14349.6	39995	10550.7	9939.84	27614.8	11063.9	17969	11054	8065.88	11980	16081.8	24220.8	24459.7	32222	33138.2	18735.8	15080.7	25389.9	35084.9	14516.8	39733.7	27766.9	11511.7	28825.9	13348.9
NDUFAF7	671.02	896.746	574.994	196	225.538	227.79	587.058	304.877	351.087	650.047	485	591.999	335.004	464.426	517.411	326.212	518.995	379.043	447.119	404.099	433.448	426	278.001	532	667.298	621.139	1007.02	688.186	1037.21	653.119	647.642	634.259	365.116	546.002	711	575.999	905.124	832.01	1062.02	750.061	508	581.015	861.004	741.006	968.042	1131.18	727.527	740.079	625.306
RBM5	4152.5	3789.72	4988.8	675.9	818.804	544.397	1744.71	1425.21	1451.24	2285.91	3352.38	3701.52	1192.38	3487.95	3086.96	2501.1	2795.34	775.947	1194.97	1609.19	2309.75	2284.97	1916.12	1898.94	3478.55	3634.36	5304.31	3759.09	6408.71	3534.2	3540.21	5520.94	1978.4	2685.87	2913.04	2551.25	3298.9	3001.24	3010.07	4994.35	3850.76	5180.16	4458.13	5204.91	2992.39	3463.61	3180.91	6839.15	3753.28
MTMR7	56.426	32.652	50.116	49.857	49.676	15.647	31.596	9.807	6.47	57.596	32.474	20.683	37.286	25.829	6.739	29.656	28.479	32.604	32.325	41.729	40.302	29.661	49.136	61.998	50.788	14.236	40.744	26.525	66.357	34.032	49.941	46.726	103.03	51.112	84.089	43.396	33.529	46.015	78.178	19.246	47.293	33.507	28.786	23.389	85.182	71.044	10.219	76.717	34.028
SLC7A2	750	357	799	8507	5271	9618	110	332	164	3392	1783	650	551.999	1278	404	683	2568	2398	1823	2573	1917	1676	15747	10789	2242	1454	976	1179	1230	1315	1413	766	4232	8075	9271	1433	1715	2013	3797	943	2404	937	1976	1339	1816	1323	568	1542	2094
ARF5	7935.36	7845.32	13014.3	3595.02	2946.24	3000	4053.33	3520.34	6891.43	4901.91	5538.95	5371.75	3474.72	6219.74	4517.82	5479.33	4276.02	3079.39	4046.12	3824.88	4744.99	4931.44	4507.91	6197.31	5576.17	5463.03	7984.01	7475.57	9066.97	7812.08	7055.31	6300.49	2621.65	5514.79	6345.74	6058.1	7852.3	7670.04	7402.02	6663.14	3104.59	2932.07	6318.9	6403	8607.03	5715.94	7759.29	7126.98	5946.57
SARM1	290.33	220.736	454.641	33.193	35.804	63.477	8.723	77.206	83.104	283.951	293.333	493.487	213.577	221.898	347.116	168.639	686.072	228.179	219.224	481.691	439.015	491.647	83.643	129.731	432.752	541.967	694.223	427.551	303.304	341.482	403.085	153.554	387.637	249.471	432.899	109.674	242.041	537.113	241.394	316.903	456.702	372.769	335.407	402.003	214.56	350.419	179.436	375.412	459.71
POLDIP2	3339.69	4248.28	6938.31	3265.91	2765.2	2923.61	1573.1	1595.34	3675.26	10873.5	4163.46	4975.96	6319.18	2961.33	5691.39	1665.61	2973.25	7498.34	10271.6	9878.87	6030.58	8130.24	5626.93	9483.69	15741	10275	5717.81	8421.06	6876.17	6645.74	7975.18	4217.97	5574.65	6767.83	8391.3	4350.08	8824.53	5934.51	20868.4	7679.37	7017.16	6267.94	7047.93	8179.63	27203.1	13460	20249.6	6901.51	7086.82
PLXND1	2312	2130	3008	34	108	55	319.999	375	472	82	218.999	92	141.001	240	74	508	103	59.001	188	139	203	113.999	26	280.999	107	56	390.999	371.001	2525	254	174	3431	99	191	278.999	418	314	1216	281.001	368	200.999	176.999	273	1785	200	238	320	1909	232.999
AK2	6481.11	7150.15	7731.99	5689.24	4752.29	5731.25	13668.7	5693.5	9669.04	10004.8	13753.1	12539	7146.49	13823.8	12335.2	6928.46	12906.5	7342.41	9280.35	9664.08	10779.3	10516.4	8564.87	13705.6	13814	17525.5	22408.5	19348	23926.6	19073.1	21012.6	15642.3	6319.58	13530.8	17702.3	18551	24285.5	24888.2	21185.4	15704.6	10398.6	10863	22760.2	18225.8	20877.3	16925.5	17240.6	19787.1	16456.9
CD38	22	9	10	13	25	16	2	9.001	0	33	44	75	31	52	92	17	26	169	59	133	47.001	30	37	64	42	18	59.001	180	77	116	128	99	14	31	40.999	11	18	26	299	24	9	39	81	37	44	24	23	19	19
FKBP4	1002.21	1737.59	1559.05	1358	1277.37	1371.79	1613.45	2157	4141.34	3873.11	3407.67	6886.57	3150.18	4460.58	4093.35	2826.26	6590.7	4146.46	4325.2	4282.78	4697.51	4682.96	2770	4098.54	2706.72	5124	10036.9	6434.33	4347.97	4063.7	4084.07	6156.32	1585.98	1989.96	4348.47	2231.27	3506	4152.98	10443.3	9250.17	1739.14	2017.98	4834.79	6178.47	9897.72	4668.99	8355.2	3900.04	3981.1
KDM1A	2178	670	2461	411.001	341.999	276.001	1513	586.001	790	930.001	1001	891.001	470	1073	541.999	644.002	795.999	321.002	503.001	501	938.371	1029	539	841.998	1504	690.001	1734	1995	3393	1601	3362	2458	357.998	804	597.998	1339	2087	2253	783.001	1593	738	968.999	1697	1656	916	904.002	2024	2276.66	1213
RBM6	2258	2007.17	2014.03	444.001	775.001	415	2252	1222	1126	1545	1600.13	1915	747	2030	1485	1290	1333	655.001	891.999	1005	1644	1336	1923	1312	1593.07	1637	3106	2182	5383	2235	2396.03	4225.06	1157	2143	1746	2914	2628	2297	1649.07	2446	1532	2646	2640.1	3117	2178	2280	1762	3605	2274
CAMKK1	32	37.009	52	7	26	5	69	28	74	19.999	40	17	8	38	34	39.999	40	20	22	37	46	11	7	31	16	39	79	31	29	42	23	36	8	9	23	30	35	29.999	46	92.999	45	47	19	37.036	32	32	39	67	44.999
RECQL	2652.12	4190.16	1881.02	236.858	171.123	164.413	834.695	827.86	1048.61	1146.32	1459.07	1849.86	819.862	1323.24	1563.77	921.607	1932.34	866.688	1185.88	1240.74	1391.34	1379.57	258.733	649.913	1943.42	2683.6	2053.52	1522.8	1970.15	864.74	1281.08	1243.16	684.856	490.601	1313.8	510.677	824.374	814.827	3189.98	1934.24	1849.72	1556.76	1723.98	1915.47	2653.19	2002.71	2397.79	2045.03	1017.98
VPS50	534	967	565	134	102	106	411	403	520	507	552.999	943	578	580.999	896.999	488	780.001	411	463.001	461.998	477	612.999	265	383.001	579	914.999	918	516.999	514.999	270.998	536	345	258.999	209.999	303.001	149.001	286.999	287.999	1140	745.001	384	422.999	430	514.001	918.999	701.001	931.999	407.001	269.001
HSPB6	16576.7	10378.4	20112.9	8	30	4	3	1	1	13	18	2	9	9	10	6	8	10	13	5	15	23	39	51	27.979	6	107	42	42	19	5	2	4	9	8	27	29	613	28	29	2	3	9	11	35	9	31	10	25
ARHGAP33	29	22	32	12	14	7	18	6	14	20	40.163	8	7	41	12	35	29	10	16	22	32	22	21	24	42	27	50.461	35	60.777	59	48	52	50	38.03	47.85	65.161	59	57	43	23.326	39	30.729	51	82.409	31.058	19	20	78	76.031
NDUFAB1	4580	4650	7404	6049	5255	4962	10692	2982	5010	4507	3170	4255	3361	3799	3825	2601	3126	3236	3857	3566	3307	3633	6232	11809	4417	3563	6073	5017	7863	5162	7720	5035	1998	3853	4806	6013	6670	7200	6255	5116	1950	2401	6009	4553	9275	6540	6170	4215	3548
PDK4	254	135	64	6742	9178	12240	305	300	91	575	170	93	75	192	188	75	245	77.001	60	103	113	221	4520	11462	578	172	15	118	59	55	142	13	77	115	25	67	57	21	128	274	126	211	302	99	163	131	161	52	112
SLC22A16	0	5	0	2	8	0	0	0	0	6	9	3	4	6	1	5	4	1	1	0	1	2	2	2	6	8	10	0	1	3	5	8	0	1	2	22	8	5	3	3	6	18	11	15	0	2	1	15	17
ZMYND10	31	29	23	12	11	11	13	5	16	35	69	52	19.999	41	18	44	44.999	13.999	16	12	35	19	22	14	22	25	57	33	43	66	24	70.911	11	42	23	76.001	66.001	76	32	46	29	69	41.999	85	60	20	34	120.895	87
ABCB5	2	2	3.002	0	4	0	0	0	2	7	1	0	7	7	8	5	1	3	1	2	4	3	2	1	2	9	7	2	0	2	0	3	0	1	0	2	1	0	0	0	8	7	0	2	2	2	0	2	1
ARX	2	5	1	1	4	0	2	0	0	5	2	2	1	3	1	7	2	4	3	3	7	0	1	0	1	4	9	1	1	0	3	0	3	1	0	1	2	1	2	2	2	1	3	4	2	10	0	0	5
SLC25A13	538.001	714.999	669	3665	2663	2448	1693	1101	2496	4465	2912	3217	3071	2119	3420	1360	4251	4861	5690	4342	4003	3391	3653	5952	4522	3900	3837	4424	2783	2354	3147	1805	2945	2236	5351	1107	1923	1851	10351	3670	2556	1912	3759	2691	11513	8393	5064	1814	1994
ST7	1112.14	1782.36	1057.41	758.51	693.999	698.779	2440.14	713.903	1282.27	756.677	759.838	931.503	712.202	1066.2	990.557	609.611	1000.13	652.381	965.01	845.052	798.675	874.223	1302.83	1495.66	1129.04	1737.07	3623.96	1510.45	2405.97	1374.93	1821.32	1956.48	489.194	1296.01	1487.08	1310	2041.47	2475.91	2447.55	3513.47	616.788	522.759	1713.27	1812.83	2429.93	1807.93	1687.26	1098.5	1312.97
CDC27	2852.98	2317.97	2884.99	529.997	418.997	421.969	1097.99	1008	1452.99	1205.99	1212.99	1408.92	895.995	1527.99	1221.99	1085.93	1498.96	792.979	1192.8	1232	1396.92	1474	755.996	1286.97	1433	1628	2850.98	2186	2495.99	1771.99	1955	1772	502.999	1034.99	1274	1030	1624	1845	2348.94	2489	862.956	799.469	2119	1959.99	2515.95	1972.98	2744	1831.96	1512
SLC4A1	1	1	2	1	0	0	1	1	0	0	1	2	2	8	3	6	3	0	2	0	2	0	6	4	0	2	4	1	2	5	0	1	2	0	1	0	3	0	1	4	7	4	4	4	4	2	0	0	4
CALCR	2	0	2	0	2	0	0	0	0	0	1	0	17	7	0	13	0	3	4	0	3	0	1	4	2	4	1	0	12	1	1	16	0	5	12	2	3	6	40	7	16	12	2	0	32	25	0	28	1
HCCS	392	1029	1176	409.999	270	200	477	343.001	677.999	1138	661.001	1453	914	741	996	843	921	964	1240	1086	1100	917.001	172	489	986	805	1693	581	654	309	466	472	540	152	459	203	295	389	2772	604	849.001	723	418.001	578	3072	2216	2591	1011	530
DVL2	640	885.999	986.001	83	95	74	257	264.999	578	473.999	1217	1242	415	1052	1231	692.002	515	707.001	785	695.001	1435	889	254	281.999	781.998	1307	1823	1642	1026	1286	819.999	1351	643.001	771.001	1063	692	783	725.999	764.001	1397	1121	1120	877	1798	815.998	990.999	1468	2699	1413
PRSS22	1	0	3	0	2	0	75	186	221	6	72	61.999	170	250.001	34	223	5	196	211	168	61	18	0	3	35	103.001	778.999	6	43	93	48	299	0	3	0	21	52.999	58	47	6	10	14	5	78.999	5	6	37	86.999	32
UPF1	772	448	1272	834	846.001	638	420.999	423.001	592	543	405.001	377	361.999	423	339	323	414	251	366	332	332	507	1290	1683	647.001	460	1012	951.999	935.001	782	1148	1068	303	741	818	762	748	972.999	883.001	1264	293	359	827	678.999	1191	640.001	850	695	640
SKAP2	1971	1911	980	90	234	163	771	309	515.999	306	290.999	486	351	402	366	249	419	337	408.999	285.001	245	277	179	505	498	448	467	528.001	586	610	772	490	202	373	669	440	622	469	846	236	213	196	530	365	1004	1033	213	335	392
SLC25A5	11878.3	12132.2	20508.5	13256.2	8998.99	12373	94005.1	17413.2	38609.1	12710.1	16958.5	18506.1	10314.2	31458.9	22748.8	19189.2	16220.1	12717	17486.5	16513.9	19041.2	13325.7	9920.25	27402.6	17428.9	16899.9	38912.2	39410.2	45885.4	39018.7	52434.8	26698.3	7387.78	27300.4	25027.8	37842.3	55807.8	61995.9	34571.5	29208.7	7243.13	6698.81	34076.3	29734.2	38234.1	21051.5	46358.3	23616	21935.6
MCUB	954.001	579	1396	4	12.428	8	262.106	54	270.982	152.994	87	34	81	186	47	99	101.111	153.001	248.071	256	235	193	9	99	368.001	101	173.635	472	528	369	306.196	165.001	74	115.999	115	200.422	436.067	446.224	186	326	237.999	284	188.06	292	138	107.028	1347	409	283
HOXA11	3	0	5	0	2	2	0	0	0	0	2	1	0	1	1	13	3	1	2	3	4	0	0	1	2	2	10.164	1	2	5	1	0	3	0	0	1	0	0	1	0	4	3	2	5	5	2	0	2	2
POLR2J	5580.07	3961.04	6571.47	2385.34	2288.65	2164.97	2752.76	1241.94	2394.19	1482.84	2356.99	2575.15	1262.04	2912.65	2451.57	1630.18	2116.02	1335.38	1657.44	1631.27	2175.5	1959.03	2504.41	3754.97	2112.74	2307.82	3900.28	3638.97	5440.21	4122.46	4462.62	3524.34	733.43	3379.7	2956.44	3796.52	4545.98	4716.99	2223.53	3697.38	1764.76	1739.36	3809.74	3417.87	3256.47	2581.52	3716.29	3734.72	3102.77
DHX33	1100	491	812	198	325	253	546	267	431	402	317	362	227.999	442	356	233	320	218	221	258.999	385	427	580	761	339	317	756.999	752	1019	446.999	1071	505	234	236	330	399	543	586.999	554	829	211	279.999	615.001	608	621.001	649	628	540	469.999
MEOX1	2	1	3	0	6	3	1	0	0	0	3	2	2	5	0	9	2	0	1	2	5	2	0	2	6	1	14	1	0	5	1	2	1	2	0	2	0	0	1	0	2	3	3	3	2	2	0	4	4
THSD7A	5	5	3	18	34	25	164	82	43	144	181.977	255	90	166	143	95.968	64	59	53	172	47	92	79	108	348	152	160.969	62	117	92	159	219	92	48	83	59	87	31	102	43	64	81	110	110	201	232	11	104	121
LIG3	390.246	556.49	624.154	354.456	288.638	294.222	253.569	303.026	542.034	555.539	579.314	834.207	296.735	777.771	827.73	448.79	890.564	378.787	614.279	534.61	737.97	701.18	507.033	647.214	583.992	938.285	1331.14	1051.35	606.916	615.589	561.574	613.32	392.063	284.293	596.841	275.321	382.7	525.765	896.054	1060.87	493.909	458.965	898.322	1083.55	682.605	618.525	1168.34	677.928	471.116
RPAP3	1466	1411	992.999	273.001	172.999	212	1052	550.999	885	596	748.001	1203	482	1053	1010	738.001	934	481	579	639	869.999	813.999	274	488	629.001	1288	2435	1444	1978	1147	1357	1321	315	783	935	454	1267	1112	1653	2612	894	1038	1322	1658	1153	882.999	2503	1155	815
ACSM3	37.169	16	39.551	2419.82	2684.63	2769.39	407.826	107.885	154.387	864.309	421.017	684.452	437.486	303.048	708.599	193.006	625.094	663.549	952.708	610.739	265.718	757.597	3182.53	2427.85	548.459	890.049	674.614	83.843	119.802	114.399	306.472	262.981	681.881	1118.95	1277.91	240.206	286.983	134.853	1980.88	150.996	437.278	257.647	366.332	291.595	916.696	590.213	97.064	307.213	236.176
REXO5	57	65	94	24	17	31	39	34	61.008	132.201	122	120.017	91	142.197	132.002	49.968	150	103.077	60	74.001	133.92	125.785	38	138	151.998	133.049	183.468	189.171	89.971	176.999	136.002	114.001	102.016	83	188.293	46.003	98	100	239.033	143	73	152.004	180.001	128.007	171	157.999	264.001	141.031	143.93
CIAPIN1	2773.97	4959.98	5054.99	822.001	572.001	899.998	4399	2749	4690.99	2825.99	3940.95	6127.99	1596.98	4432.97	4388.99	2311.92	3695.99	1978	2311.98	2463.99	3222.97	3374.99	819.001	1587.98	4489.97	6943.99	11402	7317	10737	7379.99	9359.99	7705	1116	5837	3935	6887	9689	10573	5279.99	9270.99	1702	2330	7959	9257.99	5485.99	3934	7132	5722	5248
SPPL2B	777.999	1189.65	948.889	476	528	403	372	971.188	2244.73	2199	2099	4169	1408	1861	2305	2495	2979	1533	1890	2550	3060.19	2627	1104	971	2178	2235	3801	2965.55	1067	1395	1002	1367	1127	621.001	1170	458	688	788.998	2825	1594	1379	1485	1816	2385	3475.09	2490	2718	2054	1919
ATOSB	1048	673.001	1275	29	55	26	382	892	520	516	479.001	543	443	607	415.001	580	434.001	328	370.001	409.999	376	350	226	189	575	616.999	676	232	478.001	312	301	643	211	189	255	288.001	338	335	780.001	215	342	271	428.999	321	830	885	195	853	490
COPZ2	2228	353	1523	271.999	522	278	23	11	14	104	10	1	54	9	9	14	16.001	87	97	46	31	24	678	840	72	11	16	14	31	7	17	10.001	39	55	92	8	12	37.999	149	20	23	9	42	17	257	77.999	9	26	26
PRKAR2B	443	13	100	6	39.982	3	2	4	4	21	14	14	61	17	13	32.237	27	18	22	11.271	16	15	4	25	5	8	29	8	12	3	6	12	9	2	3	3	12	20	20	12	22	27	12	16	24	14	11	12	10
MSL3	1523.7	1949	1862	238	280.001	194.999	764	452	691	788.999	818.449	1242.11	554.001	912.999	997.575	617.681	947.545	453.998	627	608.001	910.191	784.001	376.001	648.664	874.514	1088	1688.24	1309	1418.47	1040	1303.52	1098.16	451.999	816.999	847.562	833.442	1419	1265	1075.68	1369	566.002	892	1341.49	1347	945.002	906.999	1395.17	1228.29	1104.14
CREBBP	1978	1164	2520	601.001	626	567.001	340.001	297.999	625.001	1041	719.001	854.037	415	666.001	570.004	714	845.001	388	491	520	673.998	955.001	827.999	1146	1086	624	1047.04	1020	1069	746	560	1125	360.998	700	622	443.001	507.001	604.001	1414	1212	529	420	847	925	1344.04	849.998	1103.01	1554.01	857.008
TSPOAP1	19	10	13	45.999	69	42	6	37.999	12	9	23	13.001	14	13	24	68.001	21	7.999	13	22	23	10	233	116.999	20	7	23	8	26	17	12	21	24	90.999	10	31	19	14	9	14	37.001	51	15	23	29	24	11	34	21
MPO	4	4	9	3	7	1	0	4	5	8	7	3	2	0	1	8	7	14	3	5	8	1	2	7	11	14	6	4	3	5	0	7	2	1	3	0	2	1	22	13	10	3	2	4	12	6	4	1	5
PON1	0	0	5	26506	9931	18181	153	44	94	14090	7367	6734	12589	583	305	382	5494	10233	13226	7723	4969	3216	32674	22267	10535	4447	2454	2967	4993	2848	3028	1180	16918	16503	29062	6519	8280	14099	46409	4111	6032	2786	5896	7795	20641	13153	1529	5565	3253
GCFC2	629.786	374.953	722.623	402.045	417.015	412.726	411.81	152.001	556.905	892.391	363.04	355.942	551.249	267.463	458.984	158.977	371.951	911.057	1048.35	938.635	1011.06	1059.64	819.994	1275	1144.28	1382.6	873.995	781.865	1159.96	720.001	930.667	391.151	567.995	516.67	811.885	394.001	1015	437.122	1542.79	1319.47	996.856	1138.9	560.944	797.924	2001.74	1557.72	2105.81	1376.99	1105.17
WDR54	1052	1717	1947	21	22	17	2587	895	1233	542	3755	1091	332	5223	1041	2623	1916	275.999	375.999	551	1890	1040	11.999	151	1739	1125	5292	3479	9927	6261	3531	8451	150	3099	932.001	6893	6836	8939	160	4427	1609	3823.99	4363	5922	92.001	170	1552	11572	6470
CROT	649	1546	582	620	704	882	524	685	815	1721	2362	5936	1127	1123	3473	341	3161	1004	1083	1631	2004	2789	1069	1767	2719	4862	2406	3060	1574	1315	2156	1652	864	798	1157	504	983	564	3770	2961	1774	1644	3051	1809	3490	2725	2914	1273	1288
ABCB4	3	0	9.083	1045.5	1407.65	1701.58	25.09	56	40.213	991.069	1456.34	580.717	700.839	1156.02	1348.65	300.167	1428.51	768.212	1303.89	950.757	927.953	857.951	2791.12	11906.1	1650.66	743.75	406.893	642.452	1419.1	611.3	569.997	166.158	1606.2	1329.26	1301.96	1258.83	1066.14	763.482	2512.85	775.587	1374.85	1352.72	1440.29	931.898	2450.81	1474.58	547.545	1560.31	1152.63
KMT2E	4438.08	4389.43	5351.45	513.322	604.09	603.53	2290.75	1456.61	1551.66	1640.07	2437.84	2282.82	714.451	3021.86	2014.64	2075.87	2041	528.999	694.228	929	1448.6	1758.54	1223.3	1296.8	2357.78	2212.92	3499.94	2751	4783.89	3034.72	2153	3845.06	967.375	2210.64	1700	1833	2116.43	2464	1639.52	3249	2349.59	2758.59	2845.63	3045.22	1642.38	1787.32	2323	5357.19	2857.57
RHBDD2	1530	3715	4281	1726	1544	2110	1673	4314	5116	5328	4986	5355	6430	5251	4461	3957	4537	8281	6948	5111	5674	4501	2528	5679	8324	6874	8957	6763	7641	5868	4330	6136	4664	6119	10468	4913	5434	5754	15507	9555	2403	2621	6653	7128	18203	14308	6832	5204	4416
SOX8	23	22	18	2	11.032	5	15	18	21	19	5	5	12	6	13	26	16	3	8	20	20	14	0	3	6	15	23	15	13	38	9	10	10	5	3	17	10	6	17	19	52.945	26.991	16	13	10	10	18	12	24
IBTK	2315	1381	1577	904.001	764	742	2464	1802	2250	2235	2201	2585	1389	2326	1432	1891	2501	2396	2068	2614	2846	2183	1540	1648	2314	2542	3147	2517	2258	1578	2044	1873	1013	1351	1637	1360	1559	1568	3842	2034	1627	1652	2513	2432	4558	3759	2430	2709	2107
ZNF195	769	633	663.001	147.001	164	156.999	1057.02	567	761.999	956.185	1405	2001	734	1499	1422	1020.83	1222	555	734	790.001	1094	1099	241.999	399.999	1132	1580	3237	1975	3214	1785	2003	2086	533.999	1151	1022	1184	1791	1682	1343.22	2671	973	1507	1876	2298	1164	1653	1408	1687	1416
MYCBP2	2052.77	728.217	2498.06	530.995	693.345	516.17	973.218	597.385	913.209	964.313	695.001	609.197	596.548	868.595	391.81	585.005	762.66	524.464	529.122	705.721	656.458	1082.79	868.948	1204.63	1023.19	573.422	988.331	1140.49	1601.08	717.741	1081.13	1328.05	440.393	627.429	663.27	608.208	956.814	1241.45	1629.84	1246.24	558.851	609.34	1024.71	946.675	2178.85	1315.34	1029.33	1526.26	832.284
FBXL3	1648.21	1212.49	1739.4	1132.53	800.89	780.953	1066.43	489.575	484.432	616.237	614.029	465.929	461.369	654.716	449.953	474.514	499.173	537.555	647.582	418.039	487.517	602.064	1290.76	1569.86	997.414	663.306	953.651	634.3	1014.03	449.595	848.921	752.462	427.081	378.743	655.156	397.81	625.248	606.131	1170.9	874.077	634.899	580.644	670.392	621.151	1070.06	823.924	864.297	1021.97	589.414
ITGAL	6	4	10	82	112	161	1	2	3	65	47	35	31	32.999	44	30	37.999	61	63	66	34	19	384.999	567	169.001	32	11	17	11	23	24	6	38	52	52	10	14	4	93	11	52	28	26	23.148	147.001	91.001	11	15	62
PDK2	809.097	3956.29	2329.23	3114.37	2283.14	2813.3	233.529	855.033	853.848	1768.43	2363.78	1788.72	944.396	1227.85	1639	475.609	2371.59	932.597	1417.3	1328.15	1450.88	1571.52	1270.75	2860.32	2401.67	2586.12	1112.31	1722.75	733	1469.55	936	533.883	1064.31	2048.36	3123.09	818.545	1169	961.813	3134.88	955.999	1481.94	674.27	2922.84	1627.85	2878.53	2262.85	895.115	1017.29	1882.04
ITGA3	3799	4589.85	9200	6	25.001	5	2251	5837	5276	2200.79	3104	1960	2233.54	6015	1534	4430.68	3536	1041	1217.02	2011	3624.42	4507	8	75	2074	5505	15263.6	5149	8128.99	2961	3196	5617	43	466	595	3779	4482	7326	1144	5181	2047	3211	7198	9802	2212.1	1835	2843.22	10521.8	7276.53
ZFX	1022.69	1192	775.827	473.001	306.001	417.999	507	377	575.999	893.001	791.999	1071	510	705	476.983	632	1181	525.001	667.001	792.999	852	986.989	785	887	835.999	661.999	1007	629.489	837.527	485	589	517.999	436.999	1052	707.998	664.001	860.999	904	921.465	936.001	368.997	274.001	556.436	649.467	1498	970	1375	617.999	637
LAMP2	12511	13811	7941	5128	3690	3121	3862	9847	7318	16579	31731	30921	10901	38704	21730	22719	27935	11000	12262	14868	17957.6	20820	7007	10650	25809	30307	43027	15077	21183	14491	13785	18836	8265	14797	12287	14538	15185	16253	27925	20803	23644	24828.9	21574	24932	19861	15149	15192	26157	25513
ITGA2B	3	9	6	3	7	3	2	0	4	2	9	1	4	13	3	10	6	1	1	3	7	3	1	4	7.001	10	10	8	16	14	2	12	4	15	2	9	3	15	1	14	25	28	11	11	16	6	6	62.999	16
ASB4	1	0	1	70	28	33	41	28	27	20	134.001	23.999	97	47.001	16	51	85	17.999	56	53	347	43	55.999	21	32	48	31	12	26	28	14	46	47	74	47.999	85	85	36	39	145	162	175.001	63	22.001	40	52	103	111	76
GDE1	3213.38	6014.58	4552.71	643.042	566.556	678.607	3314.06	3236.06	4336.62	3164.37	3437.65	8304.05	3680.07	5333.87	6902.24	4682.65	4269.98	3704.82	4439.43	3676.05	3668.87	4850.42	1157.92	1580.6	3348.76	6092.89	10318.4	5313.94	3567.89	3070.09	4074.06	4704.44	1231.25	3243.06	3349.3	2605.86	3034.54	2734.68	6506.97	5783.76	2188.83	2139.06	5775.63	2928.61	6762.39	5337.6	5617.7	3212.48	3690.99
REX1BD	2544	3279	5066	4282	5058	3669	897	1304	3026	4594	3008	2999	2703	3090	3610	2299	2351	2153.99	3299	2429	3060	3290	5642	8805	3601	3226	4673	4391	2618	3258	2712.95	1498	4062	2089	5340	1648	3056	2821	6064	2351	1817	2405	4544	2994	5243	5718	4081	2338	3755
CRLF1	776.893	32.186	200.526	2.006	7.747	2.021	0	3.022	8.308	10.453	5.978	6.984	5.961	5.33	3.449	7.967	11.085	3.324	37.066	9.627	13.642	5.615	0	4.116	35.596	7.651	13.636	9.928	13.579	14.805	11.05	11.54	16.392	2.915	9.731	1	12.519	11.496	6.484	5.472	17.48	13.612	3.563	10.486	62.706	25.087	27.773	10.497	6.947
OSBPL7	158	153	226.001	2	12	2	109	281.001	433	34	178.001	1059	90.001	325	666.998	337	141	88	73.999	131	124	194.001	4	11	63	522.999	242.999	113.001	144	105	164	118	38	123.999	62	106.001	87	61	24	54	98.001	170	190	142	33	32	52	363	183.999
TMEM98	5390.99	11012.9	11571	1113	449	508.001	1928	1539	2113	4519.9	5190.97	6779.99	1758	3325.99	3604.97	1606.98	4451.98	2303.98	2817.99	2377	2787.99	4080.97	427	722.974	7913.99	7522	4393	4196	4071.98	5397.99	6202	1953	2048	6260	4925.98	4633.99	7147	5925	8060.99	5468	3363.99	2873.99	8827.99	5621	4845	3260	3657	2912	4382
YBX2	4	5	4	13	16	12	12	1	4	14	8	2	8	6	3	9	6	15	3	5	10	6	10	9	6	5	14	6	0	22	9	7	8	5	12	5	5	2	14	2	16	6	6	3	13	18	2	9	15
KRT33A	0	1.005	0	0	0	0	0	0	0	0	0	0	1	0	0	0	0	1	0	0	0	0	0	0	0	0	0	0	0	0	0	0	0	0	1	0	0	0	0	0	0	0	0	0	1	0	0	0	0
MAP3K14	94	172.792	213.948	220	230.18	421.366	40.999	39.998	81.678	167.728	181.151	246.773	77.938	125.425	229.749	107.704	176.913	105.879	98.765	121.738	100.883	180.866	177	580.585	190.448	146.923	261.537	244.967	235.796	182.815	190.569	144.638	101.64	114.999	106.35	127	155.982	192.963	779.813	312.658	162.961	170.729	230.865	203.268	800.518	198.868	415.799	182.486	171.915
ABCC8	16	7	9	7	25	5	2	2	2	40	17	33	10	19	29	50	42	23	26	25	33.002	15	8	20	17	23.999	33	14.001	6	18	11	7	15	2	8	3	4	4	29	9.999	52.001	34	13	30.004	36.999	22	15.999	34	31.001
CACNG3	0	0	0	0	3	0	0	0	0	3	0	0	1	1	2	3	0	1	3	1	2	0	0	0	1	1	0	0	0	3	1	0	0	0	0	1	0	1	1	0	1	1	0	0	1	2	0	1	1
TMEM132A	428.488	155.697	357.089	5	5	0	190.983	525.988	471.793	669.538	603.978	1027.73	819.938	858.813	515.126	426.636	371.476	241.352	354.498	620.834	498.048	655.064	0	26	466.999	829	4143.47	1421.97	2720.62	1359.01	1437.68	2805.37	17	334.001	58	705.663	1129.72	1243.75	108.001	1210.58	521.874	1056.53	1057.28	2638.9	103	89	1407.92	2735.64	1445.37
AP2B1	3634	5531.98	5352.99	280	254	287	1841.98	2772	4931	1494.98	4294.99	5877.98	2184	7855.95	3566	5679.94	4626	2247.99	3176.99	2823.99	3526.99	2796.99	489	954.991	2287	5489	11906	5632.99	6501	4735	3653	6992.99	916.999	1439	2730	2023.99	4456.99	3609.98	4395.15	4380.99	2393.99	2267	5672.99	7153.99	4953.99	3862.99	4231	6134	5159.99
TAC1	3	0	2	1	0	3	1	0	0	0	0	0	1	0	1	0	1	32	2	3	2	2	0	3	0	0	0	0	0	0	0	0	0	0	1	0	0	1	146	8	0	1	0	1	152	3	4	1	0
ZNF263	694.553	324.894	713.265	224.734	231.584	289.992	442.275	205.043	253.15	469.54	302.975	296.37	272.999	391.047	275.657	240.556	315.932	255.822	649.495	316.305	285.675	395.503	528.313	504.494	1103.9	440.051	710.51	688.537	1064.44	514.842	972.865	855.689	405.864	669.159	511	750.107	843.314	804.797	954.358	902.331	792.119	539.584	644.558	571.107	982.433	574.038	1090.39	798.375	487.744
CX3CL1	27	4	23	322	440	795	10	207	207.001	941	528	576.999	601.999	1170	540	1234	1114	471	640.001	636	752	818.001	522	586	1065	625	2292	548	773	337	291	3006	388	660	693	489.999	453	705	1547	486	450.001	304.999	727	1057	1881	1122	610	1711	865
SPATA20	1372	5001	1716.82	964.001	679	1190	636	2000.4	2685.38	5732.95	4306.63	5689.6	2700.8	3842.3	4866.49	3294.19	4942	3113.82	4307.57	3948.82	4704	4139	1539	2620	5857	6182	5608.6	4308	2692.83	3349.67	2543.49	2745.78	2476	1707	4503	1296	1747.8	2231.33	6180	2722	1604	1914	3784	3932.82	6316	5485	3162	4467.81	3962
CACNA1G	11	1	6	3	6	2	0	3	5	3	6.015	0	3	10.11	7.233	20	5	1	7	8.347	10	9	0	4	10	5	12.101	5.012	3.009	4.006	5	8.55	6	2	0	1.012	0	3.041	9	1.002	16	13	6.006	1.016	13	12.297	8	8	6
TNFRSF12A	4146	16495	12034	2565	971.001	4355	1030	11616	20027	18969	25703	22266	13402	28268	21214	24023	22977	12827	15165	15134	20717	21904	95	2816	26107	29028	45330	26895	33637	29596	20922	33946	6482	12960	18908	18653	27771	26579	41650	40335	11821	15694	40686	30885	34015	22427	29954	23272	29037
DLX6	1	1	0	2	2	0	2	0	1.002	5	1	0	9.005	3	0	1.831	3	2	2	5	1	2	0	1	0	5	3	1	0	8	1	1	0	1	1	0	1	1	6	3	12	3	0	2	7	9.953	1	5.992	1
MAP3K9	5	8	22	29	55	53	405	443	595.726	366.301	452	582	397.037	942	314	547	392	302.397	325.541	335	377.886	485	131	140	564.475	667	1773.96	723	1343.92	630	635.014	2474.33	267.709	357	380.833	584	534	635	1003.39	1337	348.623	556.128	652	859.001	1125.07	798.515	782	1335.95	590
RALA	5033	7066	6965	486	395	444	5452	2824	4737	1905	4585	5351	1362	5314	3829	2947.99	3235	1714	1925	2319	3101	2522	667	1157	2699	5968	9747	6142	8317	5059	4908	8851	758	1997	2710	3850	4552	4112	4425	7579	2568.99	3130	5141	7194	4722	4168	5017	7388	3594
BAIAP2L1	194.64	80.254	227.274	563.153	544.995	685.98	1839.71	1607	2047.95	3065.51	1258.71	734.939	2052.97	1307.02	742.932	1772.32	615.832	2373.83	3154.32	2976.88	1578.52	2271.89	1479.99	2009	3946.28	2739.86	1752.93	1213.71	2518.58	1334.16	1870.33	1879.39	1824.91	1220.88	2206.49	1890.57	1872.87	1540.85	5632.34	1739.51	2971.78	3131.7	1624.02	1992.5	6007.71	4648.8	2704.49	4007.66	1594.04
KDM7A	312	71	123	414	363	346	558	134	101	76	57	32	62	69	37	105	47	38	65	57	61	51	362	541	123	55	70	37	114	33	46	154	73	71	91	52	41	69	297	106	81	71	51	39	337	116	128	109	60
ETV1	47	29	56	56.999	100	120	238	595.001	463.999	525.001	1190	688	592	800.001	288.999	1224	1120	466	672	683.001	708.998	550	384.999	345.001	1033	872.999	696	667	723.002	496.002	789	229	228	331	288.999	252	492.001	448.001	594	165	864.999	718	801	1158	478	502.002	252.001	506	549
AGK	1408.24	1586	1248.11	212.204	242.035	294.617	1314.02	774.777	1007.28	936.282	1604.4	1418.2	602.227	1844.74	1528.64	752.093	1643.24	817.817	894.078	909.305	1251.31	1328.75	568.711	973.494	1553.02	2252.67	4293.51	2677	3782.13	2601.68	3069.06	2725	576.415	1252.22	1236.27	1492.69	3386.44	2940.41	1698.56	2735.13	815.893	1150.69	3088.92	2939.59	1466.79	1322.14	2643.75	2061.2	2194.02
ALDH3B1	1075	2462	1511.98	49.001	67	54	2004	1808	2065.99	671.988	1077.99	2160.92	248	1548	1479.99	643	777	212.998	204.973	339	597	686	67.001	411	1846	2639.96	4011	1646	1085	1353	729	1745.91	198	357.001	504.001	390	613.998	671.986	455	1309	531.619	885	1206	2939.99	659.999	521	1252	3674.99	1705
TTC22	5	1	14	41	29	50	312.964	93	241	659.999	71	106.999	767.001	105	147.814	130	77	325	1158	375.955	98	126.999	100	201	785.001	219	133.999	114.001	87	102	189.999	156.999	402	61	195	49	114	84	2599	152.999	238.999	96	80	66	2441	1609	469	139	106.001
PHTF2	2568	4049	3230	75	75	50.999	362.999	204.999	283	99.001	404	542	207	709	289	343	454.999	283	233	348	472.001	288.999	88	159	188.001	430.999	1031	564	1429	499.001	469.999	1363	105	353	162	675.001	589	1126	398	547.999	454.999	491.001	396.001	731.001	353	304	822	1028	353.001
CCL26	549	550	693	0	0	0	0	1	4	4	2	7	3	10	2	6	2	2	0	7	6	2	0	0	3	6	20	28	98	17	14	76	0	1	2	15	15	65	2	147	0	11	0	30	1	0	37	58	8
FARP2	1171.5	984.926	1392.92	322.972	304.153	378.537	757.847	662.307	927.634	534.09	831.602	1759.8	468.43	932.379	694.808	928.436	1106.92	549.182	534.948	804.84	836.708	655.979	1069.59	755.244	869.138	1368.71	1564.2	925.653	1115.07	777.362	1217.78	878.145	469.932	519.071	736.906	474.621	865.648	769.77	1606.92	858.935	511.454	516.608	965.453	1200.88	1675.24	996.263	893.506	670.567	755.381
USH1C	1	9	29	1	6	9	5742	4287	5647	1265	3421	4016	1627	3705	5867	3953	2102	635.999	1082	1125	977.999	1692	1	46	4020	7474	4449	3477	3283	4745	5410	2360	609	3117	1589	4490	5500	3207	1783	1460	1801	1735	4781	2983	2351	2980	1397	3350	3411
GGCT	1895.03	2159	2194.62	1068.98	770.985	1012.99	3856	1840	4306	1976	1812	2852	1603.99	3693	3096	1816	2173	2615	2441.97	2459	2096	2167	1108	2476	1785	3274	6691.99	4305	4555	4294.83	5368	3542.8	974.581	2326.81	2332.98	2937	4765.5	4997	4229.99	2953	1421	1598	3920	3179	4570.53	2973.99	4904	2547	2536.99
DBF4	265.978	243.777	273.999	69.999	56	55	461.945	131.988	495	201.72	246.748	319.813	87.974	417.885	348.044	232.67	288.059	205.264	240.805	238.691	320.304	301.73	69	200.999	227.848	398.952	804.946	949.896	915.864	809.695	829.996	533.849	97	181.805	194.938	178.958	550.913	563.017	507.931	898.953	157	222.843	575.917	583.941	429.903	229.866	1297.9	392.995	357.916
TBXA2R	238	586	637	4	56	5	3	2	2	2	6	4	18	11	3	6.068	9	4	8	4	14	8	3	9	5	2	24	5	7	6	6	9	1	2	4	8	4	14	6	12	8	24	6	16	7	26	14	12	11
IFRD1	3044	3557.48	1802.68	227.547	344.785	334.571	336.038	518.08	409.279	1105.93	1062.43	2077.19	698.104	1921.3	1414.18	1211.21	1237.46	1022.18	1028.12	877.226	1285.69	1042.53	1007.75	653.796	1162.05	1042.6	3587.76	1835	3796.78	2402.65	1377.87	3374.84	1468.87	2051.55	2489.67	891.38	1380.49	1247.19	4257.18	2843.49	2639.66	2695.82	1956.47	3375.58	4052.77	4022.96	1973.68	3610.64	1723.06
LGALS14	0	0	0	0	0	0	0	0	0	2	1	0	1	0	1	2	0	0	0	0	0	0	0	0	0	0	6	0	0	0	0	2	0	0	0	0	1	0	0	0	3	0	0	2	0	0	0	0	0
COX10	782.444	1591.11	1230.58	328.034	188	276.078	726.435	794.233	1343.92	810.187	1562.56	1471.75	623.338	1712.76	1513.65	780.444	1134.2	727.071	914.065	858.58	1081.56	825.142	367.143	538.708	1463.64	2183.12	3441.02	2323.03	2344.21	2172.27	1741.24	1866.71	444.183	747.43	1458.96	684.621	1731.18	1526.06	1948.58	2153.2	847.966	723.693	2059.14	2294.58	2075.64	1619.47	2402.53	1942.18	1538.94
GTF2IRD1	456.001	262	450.001	127	49	93	165.999	129	154	309	348	196	204	418	209	257	281	216	247.794	206	348	256.132	135	181	314	418	645.001	519.001	952	523	552	868.699	312	506	762.001	511	486.89	597.001	504.001	388.999	309.999	263	463	602	429.999	646	300	690.001	365.001
PAF1	1788.5	3372	3329	953	746	984	1375.05	1471	2545	2476.87	3218	3593	1800	2921	3339	1965	3509	2033	2323	2361	2907	2620	1215	2147	3573	3645	6519	5129	3942	4229	3065	3920.38	1716	4350	4694	2816	3999	4555	5421	5849	3046	2587	4616	5148	5849	4330	5317	4726	4068
VPS41	1768	3685	2053	341	279	387	879	1090	1691	1510	2440	5370	1298	2790.26	3747	1673	3471	1212	1576	1683	2041	2389	609.999	1015	2089	4638	7541	2943	3078	1718	2242	3059	860.999	608.999	1125	636	1385	1273	2917	1984	1650	1705	2993	4889	2001	1651	2568	3146	1509
ARHGAP44	145	38	114	6	19	3	340.001	137.999	145	61	39	175.516	96	128	73	115.001	56.999	83	83.999	81	56.57	89	25	28	84	162	219.883	68	59	67	58	80	41.257	75	85	55	63	70.001	178	89	67	58	74	73	177.001	164	53	36	72
ELAC2	2773	5156	4618	1031	778	1334	1410	2329	4986	4405	4759	7248	2468	4655	5879	2270	5139	2798	3757	3731	4263	4414	1704	3122	5349	7731	10414	8594	5754	5918	5119	5496	2340	2786	5223	1495	4734	4498	8680	10586	2228	2514	7263	7425	7033	5048	8957	3786	4114
SCIN	7	3	4	3	5	3	1245.87	508	498.994	24	295	890.204	49.967	2430.67	854.869	249.477	63	199.308	45.001	295.502	92	158	1	4	183	723	5203.6	299.799	1163.77	3007.15	3475.95	9492.38	8	60	6	244	712.248	336.999	140.23	90.069	128.981	218	501.151	2233.37	8	7	103.999	398.796	109.999
ARSD	690.086	590.713	1083.41	3731.64	2522.21	1870.54	4161	1540.08	1535.42	1324.9	1290.89	1972.47	1100.23	1455.01	1071.27	2007.31	1512.38	494.399	764.289	811.404	952.822	1045.52	5145.66	4210.99	2568.82	1884.31	3014.78	922.439	1099.78	843.655	1178.15	985.553	591.975	2059.24	1371.51	1555.98	1640.06	1870.57	812.619	889.626	463.248	406.474	1007.79	1052.14	1506.78	892.731	812.831	1264.7	1652.77
PNPLA4	672	829.999	884	1369	1098	1083	3077	820	1520	1132	1295	1734	972.001	1633	1604	994	1461	1065	1303	1128	1493	1342	1282	2147	1299	1707	3081	1161	1420	1113	1502	973.999	718.001	2002	2094	1943	2431	2537	1139	1262	405	397.001	1330	894.999	2074	1588	2406	1682	1698
MYH13	4	0	1	1	2	0	0	0	0	0	1	0	0	1	4	3	0	0	0	2	0	0	0	1	2	0	0	0	1	0	0	0	0	0	0	0	0	0	0	0	1	1	1	0	3	1	0	0	0
ADIPOR2	1213	417	1007	2234	2484	1972	2597	715	867	3123	1666	632	1318	1387	812	886	1097	1948	2050	1721	1417	1760	3194	4747	2950	1102	842	1144	1576	966	2283	898	2432	2672	2767	1577	1708	1800	4024	1521	1579	996.001	1639	661	4251	3771	1267	2078	1675
CDKL3	116.12	104.052	94.001	28.384	21.167	12.488	245.915	48.673	33.905	10.68	50.931	30.244	32.296	81.255	39.094	21.047	23.673	12.486	25.95	25.386	31.375	23.252	23.917	38.243	19.19	9.978	103.939	59.516	196.276	81.481	81.631	114.442	17.864	151.325	58.599	266.283	137.998	118.246	41.089	107.246	47.586	83.926	63.305	107.227	50.777	37.017	32.884	95.614	60.4
UPP2	0	0	1	5047	1850	61	2	1	0	50	6	6	3	0	6	2	7	4	3	3	2	15	474	1837	107	14	2	0	1	3	10	4	2	1	3	11	8	4	6	2	4	16	19	0	3	19	3	27	6
PRSS21	35.001	39	33.999	3	0	0	131.001	3	0	0	107	1	11	34	2	73.001	4	1	4	18	26.999	12	0	8	110	220.001	221.001	22.001	83.999	322	225.001	20.919	1	52	11	140	142	118	3	106.999	40.999	61.999	194.001	79	15.001	20	81.999	193.001	243
MARK4	427	271	651.999	104	128	87	134	146	151	203	152	151	200	208	101	178	106	150	155	166.999	174	182	314	348	275	158	341	295	684	352	363	601	125	307	250	336	415	455.999	321	238	169	121	268	426.999	546.999	413	248.076	715	262.999
PROM1	5	10	40	3	4	4	1503	3533	4049.99	1908	16415	18941	4481	21182	12008	18329	9572	1638	2042	3167	2960.99	8014	1	82	12386	22936	40103	4034	10681	6636	9434	11713	2	1102	16	5216	7253	6187	850.999	2046	5182	5708	10565	17036	48	211	1066	20101	8125
CCDC124	2847	4313	6828	1250	1094	1507	582	2109	4764	2291	3477	4064	1673	4473	4007	1897.38	3592	2069	2415	2533	3598	3345	1863	3665	2867	3729	8069	7746	6158	6159	4225	5951	1324	3128	3873	3677	4978	5692	4861	6254	1810	2456	6453	5550	6564	4132	9016	5478	4600
CEACAM21	2	0	1	0	11	2	0	1	0	0	0	0	0	0	2	0	0	0	1	0	1	0	2	20	1	0	0	1	0	0	1	0	0	0	0	0	0	0	0	0	2	0	1	0	0	2	0	0	1
PAFAH1B1	3390	1831	3652.08	946.897	721.094	752.999	2696	1300.86	1388	1866.96	1408	1499.74	1280.73	1881.56	897.716	1553.68	1461.25	911.707	1170.6	983.4	1269.75	1534.47	1202	1701	2010	1529.1	2274.86	1722	3028	1295	2190	2428	843.25	1250	1674.93	1936	1867	2248	2563	2084	973.517	1186.14	1652	1633	2610.69	2666	1838	2362	1307
NOS2	0	2	5	3	8	3	5	1	1	11	15	216	326	4	1235	80	14	26	270.001	14	16	12	2	2	7	53	9	5	2	3	1	16	187	0	64	2	2	4	620	8	15	10	6	2	338	926.991	8	4	5
DNAH9	5	0	0	5	6	1	4	3	1	8.014	7	6	20	4	5	17.526	8	11	14	5	11	3	1	3	0	1	6	4	0	8	0	1	5	1	0	0	2	5	6	0	9	10	0	1	4	2	3	0	4
BLTP2	1321.43	1368.68	2233.55	251.928	162.581	297.521	635.749	1729	2450.52	2140.64	1988.57	3047.6	1859.44	2442.54	1452.75	1786.26	2896.62	2237.49	2125.07	2028.16	2942.29	2843.68	343	917.234	2442.8	2860.66	4294.36	2678.72	2138.92	1562.79	2181.48	2078.23	973.958	934.842	1532.54	726.394	1340.9	1650.65	2954.49	2176.79	1098.62	995.539	2370.93	2458.74	4255.57	3099.59	2939.92	2024.94	1661.98
SLC13A2	0	1	0	22	27	37	10	6	197.999	20	25	12	3	1	25	11	39	12	11	25	6	58	19	56	113	177	2	6	6	17	10	1	5	6	36	5	0	6	39	0	15	2	17	23	43	9	5	8	7
GAS7	140	38	134	5	26	7	10	9	5	4	7	61	16	42	68	84	45	5	37.999	7	11	44	6	59	28	10	29.993	2	1	8	8	10	2	1	0	2	6	20	7	2	16	16	16	33	24	6.082	3	10	21
TRAPPC6A	1043	1655	2383	2577	2352	2220	2020	1051	1208	1451	2877	2056	750	3186	1626	1388	2087	821.001	775.001	1195	1608	1900	2772	4276	1852	2153	3422	2189	3787	2849	2756	2659	741	3795	2930	4306	3970	3439	1471	2533	1062	1476	2974	2396	1673	985	1548	2586	2569
MATK	1	1	1	3	13	2	2	2	4	0	2	1	5	10	6	7	1	2	0	7	5	0	4	7	0	1	11	1	8	3	0	1	0	0	0	2	0	4	0	3	0	9	1	0	2	2	6	3	2
CEACAM7	1	2	1	0	0	1	94	14	1	1	0	2	2	3	1215	1	2	1	1	0	0	0	0	1	1	3	0	0	0	4	2	1	0	0	0	0	0	0	0	0	0	1	1	1	0	0	0	0	0
CD79B	64	151.749	453.43	2	7	1	0	2	1	0	0	1	0	5	2	7	1	0	2	3	2	2	0	16	0	0	1	0	3	3	0	0	0	0	1	1	0	4	1	0	3	0	3	0	7	2	2	0	0
SCN4A	7	2	4	2	7	1	4	0	3	2	4	7	10	11	6	8	8	7	6	7	9	0	1	9	5	1	11	4	1	1	3	2	6	5	2	9	3	0	7	6	9	11	2	3	5	12	2	7	8
ST7L	568.8	1084.55	760.636	232.842	167.247	176.911	678.682	304.37	362.607	287.115	542.708	755.781	311.887	589.23	661.154	306.432	460.527	186.424	246.033	261.568	329.648	305.046	253.957	360.449	423.24	508.621	888.085	744.488	994.23	695.723	886.567	753.882	385.878	592.904	788.078	549.441	816.625	822.619	635.631	524.602	237.428	306.453	601.887	602.308	563.488	473.86	583.92	518.598	442.659
TKTL1	0	0	0	1	1	0	1	0	0	1	0	1	5	1	3	5	1	0	0	1	1	1	0	0	0	0	2	0	0	2	0	1	1	1	0	1	0	0	1	0	0	3	1	0	2	4	0	1	0
PAX6	24.26	2	6	4	25.539	6.989	2	0	2.012	5	106.492	100.884	11.012	20.618	17.001	17	13.634	12.894	8.363	6	10.483	5	1	7	35.099	21.14	47.141	40.262	46.474	199.04	36.122	18.75	5	19.732	3	116.763	152.81	48.421	4	869.513	72.805	508.592	831.287	353.766	11	10.033	25.423	140.266	118.701
RPUSD1	388	271.999	727.934	123	161	106.999	130	133.999	1009	954.132	304.001	487.456	726.662	287.892	908.079	200.001	196.001	1185.76	1174.74	1611.66	1418.89	1389.89	230.001	385	949	1553.88	708.001	1216.99	445	684	672	462	451.006	319	600	234.001	473	460	1727.74	2046	467.38	451.011	372.999	948.718	2021.95	1577.86	3859.37	963.913	788.891
RHBDF1	1392	1160	2628	50	33	42	504	531.999	779.999	291	320.961	300.001	343.951	378.993	148	468.001	141.001	216.998	360	238.001	253	209	106	127	275.999	474	1082	294.001	470	407.001	551	1107	128	212.001	119	269	298.999	403	419	398	104.999	259	269	458.001	496.999	433.999	304	401.999	258.001
LUC7L	2413	1437	1915	360.999	592.001	314.002	949.999	984.999	1090	1679	1395	1767	1255	1731	1622	1476	1143	606.998	1104	1143	1877	1615	1405	1138	1737	2219	3250	2577	6077	2328	2089	3736	2015	1699	1466	2121	2176	2131	2522	2804	3328	5812	2601	3667	2239	3490	2376	4712	2447
CACNA2D2	19	2	7	2	6	3	6	8	3	7.028	5	8.213	4	8.108	16.341	18	14	2	9	12.001	15.04	13.038	1	7.039	8.563	19	27.063	14.005	32.531	13	18	18.063	3	14.047	15	5.176	19.273	8	9	13.055	19.302	20.994	18	10	15	12.967	13	34	17
BAIAP3	10.524	4.112	15.424	196.654	211.3	346.501	75.187	69.235	132.831	1471.38	981.348	637.213	522.274	357.485	585.368	534.459	1883.92	589.047	862.659	1072.78	1225.56	1018.18	323.719	319.905	1091.03	891.831	244.075	360.847	209.054	215.207	340.174	100.549	831.775	226.293	990.629	291.609	456.288	424.375	1902.78	513.219	1298.18	614.803	1012.66	393.78	2439.23	1728.21	469.625	1096.52	1092.2
TSR3	827.476	376.888	1136.58	500.346	667.7	300.498	472.812	195.765	356.17	496.621	266.653	277.787	359.309	298.516	320.633	231.541	265.08	237.953	462.342	266.219	219.44	368.814	1013.28	1336.1	899.967	153.167	453.925	530.153	564.946	320.794	866.826	347.451	249.226	327.707	383.371	414.391	455.712	526.626	588.219	371.78	257.819	157.197	483.34	348.22	992.768	647.793	937.375	442.481	344.803
PIGQ	722.999	824.452	919	526	828	484	237	696.869	906.2	1262.87	843.909	1233	1204.16	977.002	1230.25	974.307	702.335	850.394	1685.88	1174.24	1241.58	1278.46	1356	1665.84	1253	1322.93	1559	2073.43	743.999	988.759	724.001	753	897.999	458.999	972.355	348.999	491	739	2377.01	1074.28	625.25	651.441	1064	1220.55	2502.72	1986.04	3561.55	1338.91	1117.63
CRAMP1	488.505	321.486	443.559	57.486	68.148	112.569	117.319	184.909	233.518	281.389	268.187	269.068	203.627	270.02	242.436	271.039	231.709	110.236	151.731	229.683	319.354	348.551	222.617	175.205	409.37	278.011	481.207	312.945	393.172	207.422	338.902	392.572	267.868	174.385	225.069	162.877	209.59	240.422	666.783	565.601	193.333	260.705	293.122	399.614	687.38	360.469	387.021	400.492	323.242
TEAD3	2001.75	1941	2872	225	300	253	208	280	379	555	472	581	344	393	454	267.295	406	228	304	342	433	456	343	520	756	609	672	694.999	484	615	583	738	532	461	610	257	335	401	826	638	419	615	611	632	831	830	632	383	496
SELE	0	1	0	30	47	36	0	1	1	7	1	3	25	1	0	15	5	28	58	15	9	4	387	112	20	2	5	7	0	1	5	0	31	4	5	1	1	2	2	2	0	1	2	0	7	54	3	2	3
DNAJC11	1354.42	3287.07	2392.83	662.843	478.401	593.275	493.195	1452.1	3052.04	2492.41	3557.98	4454.44	1919.79	3251.89	4493.78	1754.39	3976.69	2168.72	2748.44	2883.38	3513.06	3112.04	958.904	1353.83	3527.69	5895.41	8079.83	5605.53	3362.71	3739.94	2360.66	3125.29	1841.76	1272.91	3715.67	778.684	2223.57	2354.95	5659.87	6236.05	2050.07	2258.27	4973.61	5596.67	6095.63	5200.52	5914.72	3329.29	3171.34
FMO3	4032	139	854	19745	14244	7109	2	40	15	6385	4532	4874	3910	1617	3267	498	3673	2762	4844	3107	3184	3299	26608	26977	7104	4626	1599	3299	3651	3700	6000	1611	3678	9332	5688	3200	5420	4018	11272	2315	5072	3173	5453	3838	8987	6245	2349	4463	4461
MYLIP	614	276	730	8	33	5	328	149	124	66	46	69	62	72	44	66	33	41	66	38	30	80	39	59	152	72	136	95	173	79	354	317	36	149	130	201	166	139	332	133	42	41	102	81	524	94	108	79	78
NOX1	20	127	6	1	1	2	185	47	14	4	5	174.999	31	5	210	7	5	7	2	6	4	2	1	2	2	48	165	1	55	0	5	361.999	1	0	0	5	4	2	2	4	1	2	0	17	2	3	2	30	0
E2F2	7	2	4	6	10	0	39	28	165	8	25	25	16	45	35	28	51	24	45	65	61	56	2	27	6	62	94	161	56	77	80	37	10	1	1	10	33	54	5	25	17	20	34	69	21	8	166	29	31
PSMB1	14922	14863	22702	8084	5288	6404	24716	5038	9579	11130	8200	7771	5157	9811	7468	6665	7743	5521	7792	6547	7849	7422	6457	16170	10197	8033	15343	12298	18235	14487	15523	12224	3845	11172	11747	14831	17634	20001	13343	13359	4718	5110	13017	10607	13404	9449	15365	11836	10054
SYN1	143	62	52	23	14	23	11	0	0	2	1	0	2	2	2	12	1	2	0	6	7	0	20	35	0	3	5	3	10	3	6	2	7	1	4	3	8	17	4	3.579	4	1	12	6	7	13	2	3	2
JARID2	736	422	890	101	134	155	338	149	192	224	227	291	172	247	211	270	226	129	185	156	241	243	208	373	297	165	248	288	443	223	346	390	128	248	222	289.001	272	343	427	384	179	181	279	272	449	389	229	401	280
CDKL5	416.993	205	292.978	42	44.841	53	169	130	194	92.009	117	276	143.004	181	144	234.001	114	83	116	88	81	150	108	155.999	138	163.011	284	102	129	166	269	303.902	53	113	67	94	145	222	212.999	90	73	71	146	168	228.999	205.002	54	184	114.816
CAMK1G	4	2	14	0	3	0	0	0	0	1	1	0	1	3	2	2	0	1	4	5	4	0	0	4	0	0	9	1	2	3	2	1	4	0	1	2	0	95	4	0	2	10	2	1	6	2	4	6	7
CDK11A	1374.02	391.36	1404.94	576.297	751.095	310.028	707.735	382.266	558.638	796.486	507.688	758.625	416.437	593.257	622.318	420.512	467.19	280.341	478.622	503.699	652.958	701.616	1016.9	941.103	718.822	529.609	858.665	883.433	1207.69	745.421	898.508	938.795	672.553	595.261	784.125	447.455	604.36	584.016	1216.87	1171.63	534.961	723.868	920.719	841.832	1666.84	1224.08	801.296	785.909	746.782
NADK	1563	825	1919	1795	1745	1560	1234	894.001	1199	3306	833.999	1114	2139	747	867	826	915.999	2978	7189	1626	1180	1259	5940	5908	3166	1338	1492	1729	1316	938.001	1888	1132	3056	1234	3257	657	910.001	1129	8095.26	1897	839.001	603.999	1171	913	8948	6360	2453	939	955
TFAP2B	3	2	0	1	6	3	0	0	0	5	0	0	3	6	3	8	0	5	5	11	5	3	0	4	0	0	5	4	1	3	1	1	6	0	0	1	0	0	8	1	17	8	2	0	6	10	0	2	5
TFAP2D	0	0	1	1	1	0	0	0	0	0	0	0	0	0	1	1	1	2	4	3	2	0	0	0	0	0	1	0	0	0	0	0	1	0	0	0	0	0	0	0	1	4	0	0	1	1	0	0	0
DLEC1	28.873	23.619	16.412	28.998	130.361	34.409	20.621	11.533	8.806	35.646	30.307	9.402	28.617	41.383	13.369	37.337	18.807	21.11	42.34	26.243	23.017	14.213	76.654	15.896	43.85	13.74	10.665	7.659	12.855	19.026	8.157	9.504	42.227	21.86	10.427	19.838	17.824	16.126	4.578	4.257	35.658	51.725	17.552	4.097	34.084	17.835	2.142	71.013	27.585
CYTH3	3122	1849	4113	8	30	29	271	142	180	133	133	183	116	225	136	107	129	98	143	100	176	169	32	96	213	174	1066	542	1327	558	768	1437	68	259	115	387	578	1044	156	588.001	136	164	383	886	227	161	738	802.001	308
ADAM22	34	5	19	5	5	3	13	7	17	36	48	70	31	31	45.999	37	52	33	10.001	34.999	35	61	2	23	62	20	45	32	114	48	73	40	13	35	12	26	55	80	55	43	65	40	51	79	60	36	48	77	49
SYPL1	4892	8215	4515	1139	979.001	1314	6833	5248	7051	5230	5666	8310	5125	8663	8642	8246	6678	5117	6191	4923	5424	5432	1794	3412	8123	9971	13085	7963	7136	7152	7856	6623	2906	3892	7078	2555	7000	6001	11584	9171	2617	2612	9300	7790	11458	8138	9795	6971	5760
CYB561	578	592	436	175	197.996	134	958	1732	3033	2517	1895	4043	1687	3248.94	3074	2227	2478	2403	2637	2753	1837	1944	544	668.999	2237	3725	9190	1633	593.001	1592	1307	2739	695.999	364	1210	365	684	1009	3796	988	636	511.001	1621.99	2479	2604	1872	1437	1069	968.999
SPAG9	3033	1031	3042	635	760	555	1268	679.999	629.001	915.001	522.999	384.999	465.999	906.999	281	628	411.999	342	554.999	494.001	427.001	561	1020	1630	948	500	965.001	599.999	1347	568.999	956	1490	430	821.999	709.999	1414	1023	1124	1399	787.001	775.999	812.999	602	618	1886	1486.74	800	1600	579
CELSR3	74	34	74	17	23	4	22	38.999	21	91	95	69	41	107	62.999	88	97	18	26	47	144	77.001	15	28	98.999	44	149	62	103	56	35	164	43	72.999	61	65	50	73	57	104	98	127	75	148	117	90	52	205	110
AASS	1747	884.961	1206.01	4294	3954	2032	112.999	89.001	152	242.001	136.999	95.999	78.999	235.001	115	168	141.999	133.999	260.393	135.001	190.001	101	7223	1741	146.999	46	148	227.999	889.999	204.994	115.001	551	151.001	150.001	127.001	176.172	169	196	226.999	276	249.999	309.001	191.001	324	406	237	242.998	408	157
PLEKHG6	0	0	5	21	33	16	425	390	443	212	281.999	218.001	195.001	418	309.999	224	82.999	125.999	151	138	51	161.999	78	194	543.999	615	415	123	137	220	272	588	129	172	246	175	104.999	101	326	68	118.999	123.999	178.999	81	574	458	146	199.001	90
SS18L2	1421.08	987.229	1402.12	867.944	667	914	3557.86	844	1359.82	973.003	1561.33	1601.31	884.187	1749.96	1328.49	942.748	1352	1026.73	1135.79	1090.01	1345.55	1175.42	1659	1666	1349.51	1551.04	2455.2	2252.5	3996.84	2806.78	3678.14	2191.45	649	2571	2001.28	3743.94	4088	3818.48	1966.11	2578.02	1111	1133.3	2798.85	2164.2	2221.78	1891.82	1906.39	2303.43	2128.9
MPND	143.676	53	283.193	662.904	758.969	375.977	151.991	55.986	139.783	234.824	149.822	165.838	115.951	100.83	145	88.999	127.753	128.936	171.787	137.934	140.971	160.879	701.991	920.963	410.904	126.79	206.828	252.001	327.899	182.404	550.906	154.364	167	309	263.928	225.989	314.38	354.876	338.906	139.057	118.919	75.992	281.951	227.91	567.936	303.967	244.911	237.91	213.035
MGST1	7607	6828	10083	40920	38762	28723	8093	11095	14983	118640	26550	34250	51368	24476	35276	19046	53542	108182	98103	72767	51493	54531	81182	130156	56411	32764	35361	37952	32342	27389	32204	24003	46100	36799	100769	24426	36117	44245	186470	43167	19949	12147	37391	25021	200877	117083	61925	32198	28384
CRY1	567	1407	610	345	345.392	441	312.001	432.999	650	580	673.999	1194	402.999	725	877	349	627	547	579	548.568	712	543	322	236	961	1340	3023	1235	1614	814	635	2081	466.999	414.001	651	338	401	452.001	1743	2334	569	736	1046	2087	1180	1164	1878	1067	497
PGLYRP1	0	0	2	1	1	1	0	0	0	0	0	0	0	1	2	0	0	0	0	0	1	1	0	0	0	1	0	0	1	0	0	0	1	0	0	0	0	0	0	1	0	0	1	0	0	0	0	1	0
NFIX	1726	597	2129	211.001	300	147	118	135	189	291	147	210	119.064	232.001	187.999	198	162	122.999	172.999	121.134	143.001	299	297.999	368	245	111	134	259.013	265.999	228	202.999	140	99	159.999	198.049	134	156	156	218.001	206.038	112.001	45.001	211	224	180	138.001	269	236	197.001
ST3GAL1	3245	5161	5331	3272	3173	6873	3072	7170	7790	2056	3208	3193	3461	5668	3647	7492	2855	3994	3820	2805	2238	2503	7721	9944	2584	3908	11805	3261	3532	2833	2414	6467	1009	1350	1838	1517	2202	2219	6630	2886	1822	1697	3306	3967	5954	6154	1957	3860	3281.99
MMP25	10.934	2.408	12.625	6	15	10.961	1	5.001	11.214	9.502	10.555	8.202	11.682	9.925	9.1	16.442	11.031	11.139	21.382	10.469	18.197	14.132	12.847	20.853	27.689	18.28	22.011	11.704	29.043	12.635	8.458	31.164	23.628	7.067	16.406	10.022	8.041	13.239	26.559	10.124	24.744	26.3	15.202	16.625	48.732	26.095	22.975	24.986	19.609
IL32	3261	5831	5549	1395	2419	2164	3497	7910	9930	31727	22250	17089	14945	26688	17914	14958	23037	25590	27354	21497	19557	16069	17393	85055	44979	27286	30224	21652	43408	31012	36179	32894	19179	31745	47436	48460	51450	40230	54591	21790	15295	15664	26234	14007	93989	51606	25668	36085	39163
PKD1	1311.69	1098.92	1362.94	121.472	187.183	152.425	56.915	195.424	194.443	1192.27	724.15	1075.33	787.43	742.484	618.402	767.757	1297.92	965.038	855.632	1108.11	1303.64	1221.33	344.719	334.837	1030.59	654.115	1098.67	793.223	925.538	601.55	534.062	863.7	912.995	790.315	1105.52	533.859	563.795	808.201	2178.39	1309.39	934.011	930.927	947.53	1090.04	1966.62	1423.67	771.487	2024.4	1375.61
MAPK8IP2	14	7	50	11	7.975	4	4	16	11	60	19	23	72	20	25	44	37	104	96	65	50	38	5	44	39	34	42	40	48	32	24	10	36	45	122	18	22	48	257	97	38	23	37	21	726	846	130	28	46
MED24	1097	993.001	1707	423.999	427.999	394	391	555	1398	1967	1816	2796	1071	1534	2392	1319	2837	1271	1607	2008	2337	2030	846	1162	1610	2137	2898	2313	1564	1255	1233	1668	881.999	905.001	1331	799.001	1151	1329	2679	2058	1087	1035	1715	2289	2682	2142	2946	2705	1653
RHOBTB2	411.069	410.856	763.65	42.45	91.148	71.116	102.729	161.631	297.113	308.507	140.195	312.566	226.047	221.63	358.92	203.367	324.963	223.876	291.745	228.563	389.753	283.018	106.013	242.575	256.274	239.917	407.876	347.788	213.119	223.718	212.8	247.653	174.92	87.834	181.218	71.908	141.461	202.664	281.201	228.16	111.492	134.256	256.834	240.13	377.156	277.357	460.905	258.694	211.376
HEATR5B	488.001	315	583	148	135	176	579	386	364	382	469	566	327	692	256	564	400	239	276	329	424.001	440.999	336	392	470	453	556.001	321	504	254	452	579	295	323	293	402	451	418	668.001	442	370.001	442	381	324	597	611	286	713	344.999
SEC62	12336	6286	9499	9726	8740	7251	9252	3699	4206	4208	3925	4395	3398	4636	3391	3246	3899	3397	3749	3130	3204	4050	9239	11996	4145	3631	7299	4201	8220	5286	7384	7960	2625	5923	6122	6789	7094	7604	7752	7599	3032	2768	5821	5511	8447	5367	3983	6013	4452
RPS20	23018.6	20394.9	30816.3	11813.3	12093.7	9782.45	28194.8	9399.98	18702.6	16324	25916.3	34744.1	14995.8	30691.6	23616.6	21512.6	25870.2	11562.1	13977.4	17654.4	24483.2	26598.6	12147.9	20309.9	13221.9	16981.9	38400.6	31114.8	50020.2	38162.7	39551.7	35830.6	5449.98	28387.9	17882.8	48047.2	47983.6	40510.6	13108	35425.8	15786.9	18342.8	34931.4	30801.6	14772	12997	25653.9	57893.5	34420
CSDE1	17335.9	45374	22927.9	4429	4820.99	4496.99	14122	11723	12903	9308	25346	33511	7629.98	29109	24308	14703	20975	7201	10111	11789	15953	14226	7780	10552	17118	32954	48570	22856	38072	17775	20132	33284	5696	10370	11336	17969	17864	16485	21051	23434	18908	20712.9	22942	34455	18116	13706	24423	45606	16241
UBE3C	3209	1508	3314	713	610	599	1657	1479	1989	1939	1524	1772	1399	1786	1086	1201	1395	986	1438	1253	1273	1795	1230	1748	1892	1694	2653	2144	3248	1376	2964	2325	760	1139	1321	1360	2042	2462	2284	2113	829	856	1682	1670	3082	2591	2556	2398	1298
REV3L	2700.72	832.123	2230.57	314.891	411.857	231.907	458.754	274.997	382.019	671.986	364.957	455.499	337.855	531.589	292.811	418.328	426.985	195.685	309.977	322.981	400.876	631.884	582.996	703.963	757.222	331.349	597.949	627.713	684.996	366.987	428.787	592.53	261.928	418.72	250.256	333.821	423.915	493.107	565.044	787.819	343.893	376.986	453.371	419.82	749.319	677.976	815.817	630.562	415.593
TENM1	1	3	2	188	355	185	1	0	3	177.004	19	1	72	13	5	32.175	51	63	107	90	36	29	1727	491	110	10	7	6	2	2	2	1	478.582	37	60	7	13	18	260	2	34	22.768	5	4	397	439	2	16	13
PAX7	1	1	4	0	6	1	1	0	1	4	1	1	3	4	6	10	4	1	9	6	3	1	2	3	0	4	6	1	1	6	0	2	3	1	1	0	2	0	2	0	7	15	4	4	8	1	3	6	6
MASP2	9	7	23	21033	12548.9	13053.9	4.148	45.001	45	4559.94	805	93.002	2842	611.999	73	600.305	719	3632	5850.01	2821	1524.75	460.001	16894	33154.1	2199.79	277	40.001	224.999	82.999	160	128.001	34.108	3407	1234	4151	140.999	203.001	354	14515	651.999	765.005	563	415.484	77.142	12987.1	8585	699.999	173.005	855.111
IYD	14	2	4	2619	1980	1457	186.001	321	267	933	380	513.001	455.002	247	130	119	281.001	293	547	303.999	255.001	241	1710	1337	1526	523	652	83	69	143.999	229	248	459	218.999	1043	87	188.999	211	1165	98	212	95	286	315	959	591.001	146	168.999	186
FAM76A	508.001	383.919	402	259	222	124	524.885	212	232	193	291	370	122	361	414.292	252	264	155	158.999	131	234	239	232	264	233.999	258.001	649	305	655	306	453	404	142	265	207	304	449	336	260	367	136.001	158	329	390.999	309	266	235	282	255
TRAF3IP3	1.007	0	2.009	37.611	65.981	20.522	0	2	0	8.053	15.689	18.162	20.229	11.133	14.1	9.532	25.243	10.708	38.623	7.1	13.032	8.522	35.297	25.158	6.523	10.363	12.817	7.104	7.06	3.9	5.663	4.041	16.685	8.014	2.218	6.832	0	2.169	20.951	1	21.684	29.016	6.623	6.003	16.016	21.681	2	8.128	3.46
POMT2	386	237	507	102	119	78	113	150	282	458	194.999	127	328	199.999	127	253.002	161.001	138.999	428.001	270	266.999	235.001	225	451.001	446.001	155	394.999	355	342	285	280	306.001	278	115	226	134	200.999	382	862.001	288	235	203	256	341.001	1181	625.002	604.999	336	243
VTA1	4953	6915	4811	1021	635.001	945	12030	3202	4161	2144	5188	4991	2176	5365	4868	2641	4199	2241	2694	2703.36	3264	3089	1156	2093	4783	7961	9714	6842	11037	7379	9737	7273	1800	6246	6119	7133	10914	8611	7418	9883	4035	4666	8419	8181	6172	4890	7023	7794	5584
MLXIPL	2	1	6	5477	7074.32	3835	208	256	443.999	5522	2160	3587	1840	1027	2744	683	3524	2344	3275	2757	3061	4421	15957	10229	4771	2860	851.999	2886	1053	1694	1571	641.999	5547	5018	6640	892.999	1296	769.001	5130	1546	2650	2998	3446	1634	7439	6484	2012	1511	2826
BAZ1B	4389	1327	3880	983	1067	693	1078	673	1341	1245	776	932	753.001	825	997.001	752	869	762	1092	849	994	1508	1420	2330	1003	984	1511	1543	1841	942	1482	1109	742	755	984	508	728	1039	2033	2336	899	759	1115	1233	1920	1635	2595	1537	879
RANBP9	2061.73	540.079	1524.31	427.084	346.466	401.115	1473.18	377.655	370.891	366.384	272.351	177.058	208.845	431.983	138.788	336.723	161.033	147.334	245.271	200.19	206.045	260.734	716.3	969.872	363.74	230.565	635.629	378.753	902.134	369.744	756.857	695.925	180.185	368.02	350.418	554.127	606.935	676.449	560.412	594.291	202.915	304.302	368.968	395.46	445.831	376.601	411.409	973.59	360.526
ETV7	153	271	307	50	40	193.999	81	111.001	278	166	117	669.001	22	278.999	708	96	207.001	105.001	51.999	220.001	111.001	405	41	75	428.999	473	299.999	240	53.001	211.001	329.001	139	14	96	30	52	124.999	70.001	69	86	68.001	74.001	328	55	53	28	202	55.999	139
SPRTN	816.858	1167.29	568.346	132	85	127	591	334	608.671	295.669	506.961	1019.94	380.644	590.148	746.008	364.443	493.451	383.141	453.092	412.999	512.644	478.293	168	245.566	589.839	982.566	1839.31	954.264	925.852	616.392	682	717.654	302.345	318.099	438.912	240.812	495.195	491.999	858.789	1045.44	281.379	362.473	676.168	870.637	800.715	841.709	1012.58	498.615	402.799
METTL13	846.001	1450	1522	429.001	349	414.001	495	702.999	1546	1237	1674	2737	834	1647	2365	868	2185	945	1064	1233	1570	1714	609.001	914	1502	2701	4444	3209	2021	2442	2189	2096	533	973	1655	875	1948	1988	2260	3652	729	758	2769	2867	1971	1596	2711	1947	1919
DYRK4	2417.58	1717.33	2679.64	320.028	271.74	300	1199.5	555.387	858.8	706.575	1059.26	971.326	443.697	1222.56	1053.58	620.339	896.363	384.577	509.924	558.077	749.178	846.442	464.862	870.288	736.382	950.131	1977.69	1239.32	1985.78	1673.58	1584	1756.23	318	1168.85	918.001	1573.61	1757	1957.38	706.872	1196	606	704	1341	1335.4	472	657.036	806.566	1812	1286
ZNF207	5271	5717.86	6538.87	707.001	734	684	2991	1846	3708.95	3618.76	3263	5433.66	2365	3749	4814.86	4048	4680	2530	3565	3876.91	4733.96	4049	1342	1922	4709.86	6153.98	9263.89	6971	5870	5499	5585	5712.98	2142	2992	4475	2518.79	4777.94	5604	5125.98	8256.98	2845	3493	5593	6190	4261	5034.96	6627	7114	4653
UQCRC1	12806	16568	25914	15398	11175	16975	18484	15155	24487	20520	22951	18214	8179	30073	18646	13778	18544	13025	14787	16071	18453	15362	12591	32200	25707	26114	40266	39063	49714	40509	35807	33363	8272	32703	25446	41800	51789	57824	35755	28075	12425	12336	38348	33103	44376	24360	36389	30779	30264
STARD3NL	2449	2704	2483	99	90	99	1037	630	1005	1061	1526	1532	1123	1777	1440	1045	1252	846	1306	1074	1205	1275	292	506.999	1793	1518	3228	2110	3973	2650	3109	2311	611	2087	1548	3686	4335	4680	2094	3338	1179	1265	2718	2846	1930	1722	2520	3005	2590
CD9	8860	23035	19893	1651	1337	643.001	13271	8417	8189	2493	6917	4554	2896	20957	4302	18274	4499	5163	6719	5876	6686	2888	839.998	1662	1977	9555	31369	6073	13503	8700	7282	18228	1185	5205	5284	14968	10039	9277	6900	14395	8124	6191	7605	6284	11873	10768	7108	11425	7953
HHATL	3	0	1	1	5	0	0	0	1	0	0	1	1	0	1	2	2	1	2	2	2	0	10	7	0	0	3	0	2	0	1	0	1	0	0	0	0	0	13	4	1	2	1	0	38	0	6	2	2
NCAPD2	1204.46	1008.88	1445.74	61	53	82	1078.35	639.263	2043.19	213.05	1235.26	1049.41	202.861	1991.87	1058.52	1088.24	1292.65	410.274	633.096	817.204	1509.09	809.508	144.159	385.226	271.13	1135.23	2664.52	2343.68	1904.86	1574.44	2037.76	1720.36	135.021	397.092	334.709	637.969	1271.36	1612.29	415.874	915.998	364.888	718.211	988.073	1729.97	332.437	255	2942.79	1143.76	595.786
IFFO1	881	1895	2293	142	150.999	72.001	10	32	40.001	760	256	193.999	325	122.001	357.001	64	218	395	636.001	784	703	765.999	483	412	583	148	67.001	508.001	389	246.999	281	99	977	291.999	473	167	188	256	1107	796.001	856	1340	422	396	1150	1649	1318	581.001	442.999
GIPR	17	51	71	2	6	2	177	196	83	163	146	119.999	76	167	97	134	49	20	20	72	89	70	0	6	267.002	215	326	117	428	206.999	199	348	21	140	138	315	332.001	275.001	55	77	424.001	382	305	314	83.999	121.897	18	628.999	337
PHF7	65.001	39	56	62	61.999	64	78.001	31.999	72	132.001	43.999	47	88	37	64	24	26	94.999	121.999	107	82	78	155	144	172.999	87.999	55.999	68.001	72	45	72	51	109	60	109.999	45	89.001	36	320	83	107.999	130	56	88	357.999	209.999	295	130	88.001
SEMA3G	3	3	3	4	6	1	2	1	0	4	8	15	9	4	34	12	8	6	4	11	6	6	3	3	20	7	6	4	2	2	6	31	2	2	4	3	5	12	21	6	13	9	7	17	31	12	12	27	13
NISCH	1634	1997	2938	558.001	644	498.999	748	888.001	869.999	1409	1535	1587	996	1824	1273	1312	1228	738	1019	1185	1528	1319	1571	1572	2004	1508	2600	1733	2287	1460	1592	2023	1147	1456	1261	1238	1446	1604	2084	1830	1788	2237	2017	2463	2731.06	2330	1493	3808	2213
STAB1	46.863	92.022	205.265	48.836	640.479	47	3.009	0	3	1	6	0	20.004	5.017	3	40.037	4.007	15.076	51.053	12.974	10.001	2	55.144	1149.55	2	4	13.003	2.001	4.005	11.001	2.002	3.003	2	0	2	5.006	2	4.003	69	5.003	9	11.042	12.004	13	59.958	127.89	3	3.001	14.001
FUZ	124.436	439.263	367.507	98.643	80.343	132.057	26.132	133.948	290.73	92.266	392.695	351.429	88.825	353.947	311.111	262.856	394.4	99.782	105.099	121.455	257.748	287.341	115.843	153.978	218.943	323.044	689.816	419.786	344.412	361.2	191.485	361.906	68.241	302.009	225.546	200.866	308.984	302.161	183.731	393.471	204.087	231.46	453.318	525.585	116.954	106.845	174.702	368.792	497.746
SLC6A13	12	0	0	425	746.999	285	0	3	2	222	18	6	119	7	14	32.001	21	153.999	162	76.001	62	35	1044	703.999	155	14	3	5	1	3	3	2	216.001	20	143	7	8	6	335	42	25	25	11	4	596.998	430.999	25.001	10	19
IDS	1548.78	2537.46	2239.05	676.217	824.352	754.717	1338.94	1686.7	1036.64	1406.34	2816.78	3135.49	2224.24	6429.44	1506.91	3103.33	3125.54	1857.96	2058.89	2130.06	2720.25	1699.79	933.671	1306.98	1930.82	2666.16	6917.43	2140.02	5137.38	2389.94	2391.49	5319.09	797.806	2181.87	2029.16	4414.91	3400.39	4819.45	3629.8	5131.17	1700.59	1697.33	2783.82	4396.06	3540.29	3409.59	1660.97	5046.28	2623.9
PRSS3	53	404	1017.87	33	28	71	10466.7	2309	4622.88	1756	826.177	3047.24	733	1157.86	2632.25	731.968	620	993.871	1112.51	1155.09	298.999	1276	580	345	3489.42	2800	806	1168	488	1064.08	1827.16	638.02	508.093	467	1552.12	737	1131	584	3355.8	548	1018.27	443.071	2474.4	380	4138.02	2946.09	272	924.999	1132.11
ZNF200	337.001	511.024	328	67	55	73.998	212.001	174	287	258.001	273.999	416.999	190	307.001	421	274.999	428	208	302	240.001	313	314.999	84	170	471	518	808.999	560	454	377	376	400.001	187	364.999	402.999	192.096	347.999	406.157	888.999	945	251	220	406	466	749.001	555.001	681	330.001	329
CD4	1767	3606	4003	3737	2311	2675	0	1	0	4	17	0	39.999	2	3	45	4	24	47	7	14	7	2952	773	3	5	48.999	0	5	4	2	1	3	2	0	7	1	91	83	4	7	9	1	2	24	44	3	5	6
LRRC23	319.478	532.504	467.828	114.801	69.436	104.245	159.583	86.591	126.843	228.428	235.347	157.824	90.936	220.644	104.106	101.578	192.032	158.941	174.582	83.841	164.101	165.77	88.336	201.062	277.427	85.495	227.659	110.737	162.506	124.155	73.146	324.001	56.55	170.458	183.405	228.518	142.683	158.686	294.81	272.092	157.324	254.227	319.264	199.466	280.423	157.93	195.055	375.848	277.44
BTK	1	2	8	4	19	9	1	1	1	8	9	10	17	12	19.999	34	9	13	14	6	27	10	11	85	5	7	29	4	15	17	15	3	4	11	2	10	9.999	9	8	13	4	24.001	19	29.999	21	16	5	16	12
HFE	335.994	414.971	389.006	241	170.977	180.999	166.49	367.997	394.911	553.539	519.723	381.035	321.119	611.498	506.629	602.238	495.24	459.913	581.896	532.798	459.058	398.797	347.617	820.52	764.433	431.396	1054.87	764.995	477.939	620.132	495.256	570.613	446.76	387.81	690.981	183.851	467.947	499.833	1099.74	357.771	305.37	271.039	779.632	548.45	841.983	623.626	641.912	573.016	584.132
SCMH1	897.998	1053	740.998	102.999	139	180.998	128.998	282.001	323.999	620.957	526.999	554.999	272.995	614.987	573.976	388.927	485.997	187	296.998	348.97	454.972	426	280.001	473	828.989	501.934	1092	537.999	564.989	561	382.999	509	226.998	490	444	353.999	451.999	451.001	437	521.947	274	326.997	622.998	631	371.999	417.956	505	600.983	518.001
FYN	3233	683	2795	1342	1122	812	488.001	316.999	428	387.001	224	220.999	287.999	364.999	161.999	423	142	150	235.999	169	95.001	228.001	2223	1284	487.999	425	876	98	329.001	106.999	259	1202	133.999	426	141	285.999	370	439	207.001	128	113.001	86.001	271	446.999	237	203	48	380.998	208
HIVEP2	1112	606	551	98	143.017	232	295.001	261	90	161.83	203.001	153	181	481	98	400.001	158.001	181.999	154	224.001	220	137	132	299	333.001	127	611	231.001	611.999	196	218	907	147	157	181	302	295	391	300	244.011	268.001	285	192	295.999	316.67	364	66	782	238
FMO1	3.001	14	2	10.984	5.008	0	0	0	0	274.02	400.001	117	101.003	17	23	5	136	86.005	25.01	57	26.001	92.008	2	44.005	732.999	149.003	2	64	28	173.011	247	13.999	26	161	11	44	154	91.004	899	27	202	167.01	386	128.001	626.009	196	60	263	609
ELOA	3191.01	3604.81	3078.47	1540.33	1119.83	1052.56	1023.82	947.505	2104.84	1717.37	1768.74	1748.35	1362.46	1672.98	1445.89	1427.12	2041.85	1498.36	1827.18	1591.31	1655.5	1538.71	1840.07	2684.31	2233.87	2936.68	3622.76	2032.13	1643.06	1338.21	1558.37	2164.93	854.186	857.811	2419.95	791.113	1322.95	1538.22	5699.9	3928.12	1213.28	1091.51	1652.55	1442.47	4613.03	2759.24	5078.97	1841.6	1221.94
LYPLA2	593.001	3090.95	2744.99	2004	1681	2438	333	4575	7850.99	6546.98	10617.9	11712.1	5484.98	9260.99	9692.7	6646.99	8733.47	4155.99	5895.98	6569.96	7824.58	7367.99	1777	4503	10414	11808	13355	12417	5465.99	9641	4714	5980.98	3408	3373	8765.19	2308	4652	5526	13723	8461	4204	3562.99	12613	10799	17267.3	11965	8728.31	7630.84	9330
CLCN6	583.999	559.999	612.056	107.261	194.999	145	209	337	227.369	413	784.258	801.35	216.814	1143.13	679.311	724.854	627.912	289	250.065	409.172	673.999	487.819	476.999	368.001	758.484	552.969	1257.67	1032.26	1343	843.001	730.996	1325	452.991	610	537.197	657.001	660.258	654.243	674.626	450.729	595.999	934.845	814.987	923.998	709.98	693.821	551	1186.94	668.941
MRC2	6386.74	2210.63	5856.97	3.992	37.378	14	1	11	1	9	13	1	7	12	3	16	10	4	1	3	6	12	23	73	14	6	35	3	20	5	1	14	11	0	0	3	7	186	6	5	13	8	4	23	12	7	5	40	10
NME1-NME2	610.753	703.268	1017.67	181.129	216.393	139.962	1394.09	930.962	1101.97	253.617	818.287	894.138	335.23	1622.73	930.904	657.08	624.162	473.532	534.089	755.775	1093.59	622.72	327.018	526.333	470.243	791.908	2537.09	1508.41	4253.11	1902.13	1801.73	2990.65	264.854	1055.06	558.452	2795.58	2413.19	2680.7	1339.39	3569.66	853.152	1131.78	2314.75	3020.29	1591.82	728.314	2134.63	2357.39	1377.83
SLC6A7	5	1	2	1	1	1	1	1	0	1	1	0	2	2	4	11	3	0	3	1	2	2	0	0	1	1	2	1	2	3	4	2	7	0	0	0	3	4	3	2	7	7	2	4	6	4	0	0	2
TSPAN9	737	806	1090	861.999	940	856.001	72	117	188.999	527	317	312.001	387	199	395	205.999	328	348	495.999	293	382.998	436.001	1602	2091	568	257	191.001	315	271	184	220	193	265	154	439	129	231	272	832	326	266	160	313	280.001	1139	831	340	431.001	333
BTBD7	1541	651	1278.98	177	163.999	229	854	545	613	746	495	523	459	639.001	341	574	442	383	411.985	408	472.001	647	394	537	675	523.001	1059.54	758	1242	557.999	883.999	980	347	461	425.999	432	528.999	664	1063	937	251.001	289.001	606.999	631.001	1036	866	628.999	869	483
APBA3	320.999	592	517.999	182.001	183	185	92	123	525.999	832	721	976	499.001	522	940.001	447	375.999	908	1019	986.001	1065	907.001	275.998	506.999	814	948.999	1077	916.999	391.001	600	376	605.999	396.999	284	722.999	304.999	361	384.999	1447	1306	540.001	651	557	878.001	1627	1276	1557	1100	610
MKS1	651.998	951.999	907.001	123.999	165	128	208	466.001	545	572.999	1427	1216	351	1391	1218	633.997	978.002	367.999	446.001	506.999	871	727	384.001	451.001	734	1292	2057	1529	1622	1492	871.999	1260	547.001	1040	753	808.002	1255	1284	899.999	1648	759	1620	2015	1966	773.002	930	1166	1605	1594
ABHD5	2865	3563	2465	764	581.001	931	1002	659	1338	704	529	991.918	691.001	945.999	910.999	746.999	763	928	934.999	803.01	715.999	730.999	574.001	856.001	843	1285	2365	1029	865	778.999	993.001	911.001	380.001	633.001	1118	502.999	875	1068.97	2583	1842	381.001	322.999	1012	941	2303	1533	1691	496.001	538
ANOS1	44	2	19	0	6	1	1	1	2	5	2	3	12	8	1	10	5	10	6	9	8	2	2	13	0	3	79	0	10	0	12	90	0	0	2	2	1	5	17	8	4	5	2	11	6	13	4	10	5
AKAP8L	205.353	282.983	302	30.299	51.057	27	45.001	128.001	219.821	367.961	293.694	433.594	193.382	360.561	548.991	242.82	329.936	170.734	385.373	266.656	297.031	287.548	88.905	82.988	622.225	308.119	884.113	510.725	516.817	325.652	104.312	681.045	259.467	255.504	344.511	132.938	148.003	171.89	583.896	809.98	259.582	266.24	466.026	667.095	690.892	392.61	741.092	743.897	494.527
MBTD1	384	42	128	208	236	155	363	104	116	152	129	85.999	80.001	131	67	108.999	95.001	36	51	74	85	154	489	415.999	178	101	163.001	133	430.001	144	315	222.001	121	195	130	198	157	162	238.001	181	128	147	166.001	146	256	240	102	317.999	166
UTP18	1062	1359	1485	582	430	518.999	2401	1065	1949	1135	1696	2020	820	2348	2278	1259	1812	925.999	1170	1282	1771	1730	398	1050	1581	2645	4786	4223	4634	3756	4279	3246	682.001	2336	1856	2720	4123	4161	1957	4677	1423	1711	3347	3503	1895	1794	4050	2999	2527
RNF216	2638.42	2491.32	2366.74	421	326	497	364.606	489	856.069	1066.57	1245.57	1812	652.561	1367	1507.7	820	1804.57	877.053	974.01	993.971	1449.63	1321.26	644.289	1039.78	1234.08	1849	3002.67	2119.29	2294.78	1449.41	1349.24	1477.26	751.459	1039	1499.33	818.001	1350.28	1441.75	2373.87	3159.7	971	1048.88	1777.72	2095.82	1752.85	1472.76	2450.93	1396.62	1357.43
TTC19	858.678	375.001	942.426	730.168	704.054	553.228	2816.44	930.398	804.989	712.383	577.001	425	575.001	1054.06	344	677.461	385	349.999	811.665	421.011	474.039	708.138	1150.71	1820.76	1882	477.999	1504.17	842.001	1647.17	685.026	1645.72	2112.17	733.136	604	719.598	598.658	987.043	1119.05	1461.01	823.013	541.001	527.02	847.004	774.217	1899	1310	1179	1080.08	647.321
PTBP1	3372	2973	4750	1827	1915	1328	1078	1842	4938	4127	4374	6800	2908	4230	6783	3847	2476	3612	4895	5738	7820	6502	2040	3129	5645	7687	7742	10379	6242	6873	5115	6630	2265	1875	3780	2324	4189	3604	9458	5936	3382	3584	5673	8936	7964	4246	11425	7052	6278
DPF1	16	17	38.001	0	3	3	5	4	6.999	5	14	16	10	20	18	9	7	11.999	10	7	21	12.031	1	1	1	5	39.999	28	50	29	28	28	3	9	0	17	26	43	7	32	13	8	41	58.001	5	6	32	24	31
SYT7	107.001	15	39	1633	887	497	5	6	8	56	22	3	20	33	6	26	7	95	46	52	16	13	2271	4325	29	20	41	4	12	12	7	50	20	27	24	15	10	10	168.999	10	20	24	11	2	124	48	11	20	20
LARS2	445	631	695	218	225	282	222	372	803.999	689	766.002	1514	409	841	1588	520	1625	775	868	942	1099	1059	399.999	686	603	1331	1424	851.001	461	480	574	376	311.999	210	404	197	356	379	1581	849	413.999	395	697	745.999	1041	702	1505	456.001	386.999
PIK3C2A	1502	1090	1470.98	355	393	324.002	1310	879	1041	963	900.928	1386	693.999	1644.97	602	1071	1018	792	742	955	1251	1091	588	861	1241	1049	2344	1500.97	2196	1273	1452	2767	471	1262	664	1469	1479	1739.89	1227	1515	767	1036	1261	1505	1582	1418	1266	2262	1244
PLAUR	3569	2781	4450	22	35.001	30	7296	4029	2524	224	369.999	178	366.999	2873	120.001	1939	89	350	451.001	513.999	152	143	14	77.999	743.999	618.001	4633	236.001	769.999	484.001	634.999	4416	15	100.999	61	393	460.999	1099	244	578	426.001	209	279.001	733	140	134.999	222	1170	504
ANLN	908	1157	513	7	2	1	565.999	316	1718	28	825	845.001	49	2372	619.001	722	1107	662.999	770.999	804	1499	529	2	190	49	1018	2781	1792	1644.53	1119	1335	1827	17	52	5	417	773	1302	164	788	82	967	628	1643	39	138	5962	1511	672.999
WIZ	1346	684	1340.98	222	210.001	219.999	156.001	224.001	295.999	449	368	450.001	243.999	386.999	293.999	263	340	234	309	253	321	328	356	537	585.001	358	726	723.002	754.001	607	704	574.999	271.999	340	496.001	410.001	554.993	559.001	554	617	232	283	642	719.001	743	523	639	514	534
RABGAP1	1335.68	1223	1192	152	187	98	827	363	455	274	451	618	195	541	456	442.267	322.001	155	212.999	248	305.001	397	361	398	376	575	1673	810.999	1274	787.999	749.001	1719	245	626	472	781	971	952	429	937	331.999	377	744	1164	429	593	632	1289	688
DCN	176184	96637	136159	45	819.001	18	1	9.999	3	36	117	23	206.001	141.999	60	63	14	19	24	84.999	20	148	130	301	138	129	1418	151	67	13	7	31	60.001	36	12	247	73	9045	8	0	20	15	2	3	56.001	76	266.999	85	203
QPCTL	108.999	422.001	223	64	71	101	35	214	331.001	547	564.001	915.002	581.999	539.999	706	569.001	841	630.001	570.999	591.998	718	600.564	92	91	563.001	740	1308	746	436	556.001	274	596.001	331.987	310	574.001	441.001	441.999	498	667	424	336	325	703	676	908.999	784.999	865.999	1370	708
PPP5C	463.379	2188.99	1659.76	450.001	379.362	403.78	105	988.001	2867.56	1255.89	2266.86	2501	930.999	1966.85	2552.97	1199.93	1100.53	1313.98	1610	1514.53	2331.67	1929.91	396.994	1014	1771	2689	3992	3603.97	1355	2346	849.999	1612.02	651	600	1658	481	1004.95	1083	2304	2739	916.001	1123.4	1657	3259.96	2435	1653.93	4139	2178.09	2031.98
CEP68	611.15	1162.14	808.344	99.576	165.095	160.011	199.73	276.01	411.061	703.51	1696.58	1989.09	397.738	1239.93	1771.04	496.027	2272.05	382.038	408.013	575.005	1334.62	1345.22	158.283	448.016	1027.03	1689.01	2351.16	1737.06	1352.15	1377.07	1193.86	806.215	535.01	1066.11	1142.14	1031.07	1319.39	1462.67	1406.01	1969.08	954.153	1212	2078	2346.71	1321.04	1007.02	1838.13	2035.06	1894.42
MAP4K3	1551	304	873	233	213	159	1336	695.999	622	529	538	289	277.999	532	162	357	323	220.999	270	276	311.094	493	386	618	636	381	613	348.999	706	270	761	597	231	292.999	274	352	430.999	434	515	385.001	374	302	443	415	573.001	612	294.966	718	348
ZBTB32	3	6	4	3	5	0	0	1	0	4	1	4	4	5	3	3	3	0	2	1	2	5	2	1	3	2	15	9	0	6	3	3	7	0	6	2	3	2	6	2	9	3	2	5	8	5	4	3	5
TYROBP	252	461.001	1369	80	258	114	0	0	0	0	0	0	49	1	2	27	0	14	24	2	3	1	107.999	1292	0	0	3	0	2	0	0	0	0	0	0	0	0	0	54	1	1	0	0	0	16	1	2	0	0
LDAF1	820.945	1676	1019	3	11	1	412	688.999	421.999	159.999	347	494	547	1248	561	1393	227.001	177.001	152.001	217	185	282	0	23	285.999	537	1484	328	629	398.001	325	1087	7	173	37.001	423	430.001	201	138	291	205.999	228	239.001	193	228.001	229.001	319.001	859.001	533.001
GABRA3	1	0	1	2	6	2	1	0	1	0	0	1	5	1	0	5	3	1	3	4	1	1	0	0	0	0	7	0	0	2	0	24	2	0	0	0	0	2	0	0	3	2	0	0	0	0	1	0	4
BRCA1	145.999	96	147	103	157	38	245.09	90	517.001	161	203	191	87.036	371	174.001	213.998	356.021	228.001	225.002	244	363.014	254	312.001	148.001	56.002	192	450.999	647.001	416	436.999	436	297.998	48.999	82.999	98	89.061	271.159	400	132	225.999	60.998	184	274	393.038	148	224.999	624.001	208.061	234.001
ERCC1	3530.04	5458.28	7450.27	1155.16	1082.74	1240.48	961.977	1299.78	1397.33	2440.14	3331.19	2600.88	1228.45	3780.07	2823.1	2910.29	3207.96	1454.94	1941.03	2073.78	3291.51	2361.77	1366.14	2009.37	3041.21	2758.4	4523.71	2954.19	4170.62	3204.12	2464	3433.83	1394.95	3661.34	3528.99	4006.45	4258.96	3901.4	3262.39	3519.57	3941.81	3136.37	4309.43	3363.13	4715.51	3476.26	2781.63	5355.29	4601.58
CD22	4	7	28	1	2	2	32	62	85	55.001	166.999	646.673	63.999	129	370	71.001	303	69	59.001	109.001	137	263	2	13	156.998	755.999	399.001	336.001	34	216.001	167	189.001	12	16	70.999	40	120	43	91.999	82	33	90	251	216	221	216.001	375.999	73.999	227.999
SEMA3B	414.001	1105	842.191	40.999	88.001	36	3721	7030	10343	1336	1285	3947	850	9751	7532	11769	1727	948	2262	1315.61	2103	1166	93.999	91	1886	2425	23124	2794	3538	1513	647.999	9100	224.001	484	259.001	1094	854.999	1028	582.001	1763	1970	1869	1212	3669	709	595.999	1584	11962	2316
MBTPS2	977.445	2340.51	923	440	345	363	600	946.924	1246.11	807.221	2080.58	2619.28	942	2500.99	2177.14	1274.22	2539.25	1253	1301.98	1393.69	1720.31	1773.79	471	673	1475.49	3119.68	3221.49	1218.36	1230.96	759.272	1027.46	958.676	634.855	531.501	831.976	491.275	783.61	823.769	2609.61	1070.64	1318.11	1363	1244.36	1754.73	2031.68	1614.08	2643.23	1317.43	895.441
PRICKLE3	120.745	202.205	181.441	59.338	61.115	61.666	38.211	86.094	181.345	81.5	170.486	149.156	70.977	260.065	143.796	91.462	152.936	79.469	70.745	110.942	138.613	106.839	72.696	96.712	92.633	177.616	412.784	175.883	181.621	144.043	63.899	177.585	72.59	92.32	116.582	68.362	108.967	105.141	145.535	301.507	75.567	70.688	171.54	206.931	122.429	133.607	233.128	145.636	137.82
LTF	2	0	0	1	6	0	0	1	1	0	7	5	0	17	7	10	98.001	3	2	2	2	2	0	5	1	1	50	0	26	0	1	123	0	3	0	0	0	2	2	9	4	1	1	14	0	0	0	10	3
EXTL3	864.999	640	1204	129.999	158.833	242	401	853	1077	1632	1480	2026	1972	1316	1233	1659	1864	1323	1815	1828	1464	1707	263	513	2455	1514	1884	1080	974	673	881	938	1010	749	1264	563	655.002	862.001	2719	1481	936.999	618.999	1257	1121	2868	3996	1283	1272	950
NR1H4	1834	241.999	631	2617	1707	2583	844	395.001	119	3050	2448	7469	1777	1761	5576	560	2709	2177	2789	2053	1581	2713	3370	3534	4656	4226	2477	3388	1562	3818	4384	1072	1615	5928	3356	3281	5781	3167	3292	969	2117	1873	5360	2811	3776	4902	928.999	3046	3434
ELOVL5	3449	7645	3559	847	562	728.001	3046	2704	3932	4331	5334	8509	4645	6599	8233	4088	7430	6991	6589	5823	6868	5811	1436	1545	4598	7026	11004	9399	6119	4711	5354	4759	3467	2874	5694	3488	3999	3814	15031	9496	3460	3761	7396	6731	14222	10262	10892	6111	4121
ALOX5	1	3	10	5	12	8	1791	1296	1318	214	381	2942	199	719	2431	719	208	88	78	160.001	46	696.001	2	78	1203	3499	259.001	12	22	75	199	67	1	145	10	288	471	41	24	181	186	280.001	1049	92	15	6	21	312	485
KDM5D	538	0	727.001	0	0	0	0	0	0	0	0	0	0	2	2	0	0	0	0	0	0	1	0	0	0	0	0	704	808.999	513.001	653	534.999	0	0	0	0	0	0	1336	585	1104	1161	745.621	810.001	0	0	0	0	0
CALCOCO1	2061	10597	5418	536.999	456	478	1458	2110	1392	880	2855	2099	811.999	2809	1789	2067	2205	435.001	731	1016	1550	1436	776	829	1629	3121	3121	1066	1637	1407	860	2395	1192	1294	1500	1167	1353	1100	1380	1710	3489	4346	1969	2244	1062	1351	407.999	4229	2279
UBR7	922	2332.36	1101	420.912	289	429	766	576.472	1499.23	606	1186.21	1770	519	1500.64	1510.78	917.455	1488.11	783.999	975.97	955.77	1122	998	565	758	1135.56	1951.59	3238.91	2318.88	1962	1485	1287.91	1362.92	384	485.943	634	489	783.97	858.897	2177	1961.12	694	933	1471.91	2365.7	1344.29	915	3180.88	1496	813.001
MAP4K5	2713	1117	2195	143	187	143	710.999	589	644	652	434.999	478	545	633.982	406	556.999	254.999	385.999	571	507	510	554.999	241	437.999	804	901.999	883	586	1145	401.999	797.999	908.999	258	300.999	293	383	540	484.999	1250	866	673.999	663.001	443	683	1092	699	1379	1023	465
EHD3	2778	4430	4909	6	64	10	0	12	13	11	23	47	40.021	25	61	40	23	14.003	38	26	25.004	30	15	58	5	59	64.005	37	43	12	19	19	6	33	47	17	24	73	50	75	20	11.005	15	36	18.004	44	26.006	33	17
PSMC4	5481	5810	7377	1721	1053	1419	3821	2744	6393	5396	4166	5078	2788	4554	5400	2804	4408	3130	3999	3633	4347	3941	1831	5144	4548	5511	10033	8789	7944	7649	8047	6154	1814	4657	6281	4164	7429	8579	9030	11357	2329	2375	7906	6877	10124.8	6145	10032	3720	4973
MAN2B2	1707	3654	3567	899	823	805	600	1182	1347	1760	1453	3175	1166	1520	2262	973.001	2279	1360	1695	2012	1672	1713	1812	1865	1491.38	2800	3204	1659	904	939.999	1338	1361	775.999	930	1198	533	881.412	1156	3406	1406	646	714	1618	1687	2481	1598	1317	1539	1261
SLC7A14	27	6	29	2	14	2	0	0	0	20.053	2	5	21	3	2	30	8	17	22	11	5	8	4	11	10.014	4	9	6	2	11	1	12	7	5	2	2	1	5	38.088	1	16	14	7	3	21	24	2	3	3
CLDN11	5678	1068.42	9019	2	10	4	0	2	0	10	10	13	8	8	15	8	3	5	6	7	7	13	4	7	2	5	28	7	46	6	2	136.999	3	8	3	30	13	114.999	8	19	9	13	4	26	9.755	5	30	33	17
SLC25A39	2915	7442	7375	2319	1968	2464	2548	7610	18196	11000	12841	20991	9139	14764	19447	8550	16826	15341	14163	18799	17267	15885	3360	6951	12169	19895	25662	25854	11744	16883	13164	11083	5505	8887	16786	6659	13791	16567	27843	19344	5366	4837	19862	16061	38510	23529	34759	10519	14546
MVP	6826.97	16376.9	14112.8	705.696	838.001	844.999	3792	7980.74	10999.1	14910.4	15806.3	21123.8	7869.81	16171.7	15906.6	14290.5	21169.5	8005.64	10351.2	13011.5	12606.3	15046	2703	7327	24828.7	28403.2	21221	13088.8	4210.29	7974.49	5133.58	6676.55	6237.98	4176	13275.1	3721	5096.4	4809.87	20583.5	9460.5	9403.36	8053.81	15118.6	9484.09	27749.2	19011.2	11703.5	11186.4	17023.2
NUB1	2405.96	2772.99	2952.99	647.997	601.999	628.001	1151.99	1299	1409	1406	1257.99	1833.99	804.969	1654	1628	788.34	1344.99	903.831	1078	875.999	1159	1358.99	1031	1639.98	1535	1932.99	2655.97	2225.99	2929.95	2151	2139	2545.92	702.942	1354.99	1906.93	977.982	1544	1476.99	2144	2651	842.999	1078.99	2108.99	2030	1888	1443.86	1882	2027.93	1285.97
PGM3	6494.79	7151.19	5190.5	819.901	822.964	1011.45	3881.69	1832.34	2917.69	3534.13	4388.63	5292.25	1989.94	4718.46	3260.9	2205.24	4446.49	2886.83	2879.61	3512.19	3505.4	3220.08	1210.35	1830.93	4722.48	7493.05	8241.39	4820.49	6916.9	5799.26	6273.1	7400.51	1776.93	3838.27	3475.94	4560.42	6548.66	6450.64	9390.02	5825.76	4152.04	4371.35	5301.29	5686.59	7492.73	4269.05	5842.94	7315.93	4482.9
RWDD2A	688	1184	800	114	120	212	736	420	539	438	581	697	315	685	533	392	620	294	294	375	413	480	271	340	608	926	1726	623	1130	727	824	1073	237	795	345	920	906	937	349	458	484	571	734	925	351	389	416	984	740
CLK1	2666	2191	2219	1181	1260	845	3917	1071	595	1542	1622	2333	644	2277	2500	1648	1922	534.001	426	453	696	1838	2647	1790	1441	2965	4815	2544	4980	2637	2631	4633	1246	4267	1779	4187	3060	2367	4486	3061	1733	4374	1760	1614	3302	1279	2379	4684	2627
POLR3B	519	1080	778.922	256	211	323	391	276	692.893	528	738	1048.96	275	783	863	446.002	901.947	482	456	602	585.967	583	441	743	695	1933	2112	757	605.002	306	627	528	314	259	387	214	371	473	982	757	506	399	578	854	741	525	1229	646	324
ANGEL1	228.286	736.798	386.136	186.408	209.068	257.508	221.186	696.361	727.629	595.19	1291.81	1168.32	412.949	1398.13	1300.09	597.257	1269.5	560.924	631.728	889.161	848.11	828.222	735.681	846.014	637.809	1925	2481.3	945.892	774.907	653.592	540.745	930.356	745.695	524.174	863.658	401.106	496.716	608.121	1516.62	1216.78	841.21	767.018	846.159	1364.8	1122.96	1043.37	1185.53	1243.68	714.893
RNF14	2116	4145.61	2690	708.001	522	636.999	1150	1477	1657	2067	1819.9	2300	1843	2078.11	2228.78	1237	2137	2105.99	2614.55	1869	1640	1733	1135	1282	2623	2569	2770	1585.72	2241	1223	1667	1446.23	1427	1151	2930	890.656	1560	1439	4694	2247.93	1332	1143	2273	2036	4684	5102.93	2383	1737.99	1286
DNASE1L1	85.963	380.043	421.981	78.694	64.234	103.016	205.857	695.263	510.425	511.494	916.762	907.966	263.107	1055.48	926.103	464.212	608.839	358.511	314.461	395.386	551.791	569.684	155.449	229.449	667.287	800.912	1012.86	625.689	628.165	642.925	481.201	882.258	129.42	360.463	400.408	701.76	553.737	485.953	527.098	928.582	457.015	607.49	752.382	599.937	651.101	642.647	671.032	1464.24	666.204
DDX11	111.317	163.747	48.314	28	113.84	103.465	94	206.373	545.524	490.345	689.816	805.316	186.562	989.474	1078.62	770.219	1124.26	409.962	518.746	736.932	1177.36	829.975	299.739	405.892	803.096	966.407	1685.8	1188.99	989.94	931.352	744.713	1164.76	353.276	406.426	389.825	503.506	589.437	587.084	248.642	647.63	317.341	927.156	606.385	794.296	642.308	870.541	1226.76	1667.56	1095.65
HEBP1	3488.05	5547	4746.73	1611.71	1411.18	1293.63	1307.79	890	1769	3466.53	3218.18	7980.6	2482.51	2188.44	6295.71	1925	4468.34	2836.15	2869.71	3383.05	3860.94	5458.77	2647.06	3226.08	2934.83	3900.4	2768.91	3083.33	1230.77	1530.79	1755.02	1257.3	1099	1131	1474.16	1049.9	1086.68	982.271	5818.54	1945.59	2135.65	2320	2405.52	2177.56	6458.57	4410.17	5364.88	3915	2514.62
GPRC5A	2117	16748	7884	4	18	2	23376	22967	31893	2311	4494	4928	1400	12202	2887	9180	3060	1507	2239	2320	3358	3898	0	11	4040	12671	26195	5691	4502.76	4966	3967	19807	5	272	40	2460	3933	3162	123.001	4319	604	1885	5854	3745	112.112	154	3957	5192	4650
MAMLD1	481	731.999	602.001	41	36	30	80	120	146	362.001	383	427	137	386.999	219.999	371	367.001	116	138.999	199	295.001	292	258	60	587	413	846	480	726	528	420	641	97	222	209	287	511.001	637.001	311.999	565	130	143	502	1054	324	314	393.001	604	515.999
CD6	4	1	3	0	10	2	5	3	10	8	3	1	5	10	3	7	3	4	7	5	4	6	2	7	13	6	8	4	2	3	0	1	1	1	0	0	0	1	3	1	11	6	4	6	6	2	1	5	2
TACC3	289	258	422	31	47.999	109	286.999	322	2076	200	570.001	662	190	1309	797	778	726.001	756	831.002	923	1625	711.999	68	516	378.001	823	2886	3300	1268	2121	1321	1713	63.999	107	66	308	918	1481	345.999	1388	94	510.001	1048	2172	237.001	192.999	4797	1176	1095
UFL1	2096	1234.62	1390	872	933	877	1592	1837	1931	1608	2206	2051.56	1212	2651.93	1600.57	1867.03	2230.42	1049	1390	1458	1586	1699	1622	2558	2069	2781	3341.64	1592.57	1955.36	1479	1543	2008.1	1070	1187	1480.02	1284	1186	1252	2104	1432	2262.99	2301	1855	1495	1971	2025.79	1723	3160	1564
POLA2	264.966	489.273	371.533	62	72.001	37.281	188.371	210.406	873.215	383.585	415.9	644.866	251.338	708.322	756.771	368.908	722.556	524.318	574.513	607.479	746.626	557.445	104.001	184	366.893	715.045	1519.38	1485.46	623.038	970.638	691.079	675.297	174.935	256.579	374.236	220.319	684.255	888.444	506.968	545.77	244.159	348.344	784.634	985.348	423.834	697.795	1524.11	488.434	562.59
ZC3H3	228	298	384	92	117	137	44	134	362	580	634	950	312	497	825	423	847	466	560	636	849	614	357	220	566	587	847	550	333	377	232	296	276	270	440	202	273	262	841	686	301	238	420	450	848	780	908	660	466
CAPN1	1813	6513.93	6625.32	1257	1024	1002	973	5382	13038.7	9216.4	9200	21785.2	5742.49	12413	15896.8	12352	9776.64	5916.06	7780.49	9524.14	8110.47	9180.86	1961	4088	12452.2	14343.4	28840.1	9008.42	2783	5507.46	3844	5455.25	2199.94	1528.38	3495.24	1575	2762	3320.02	7980.92	4092.9	3067	2854	7495	7971	9949.5	7491	7883.29	10356	7378
ACP3	7	0	2	1	2	1	33	19	83.001	3	4	1	5	5	1	21	0	4	11	15	5	1	0	4	5	2	7	0	0	5	2	3	3	1	1	0	1	0	1	0	4	2	0	2	1	4	1	1	1
MDH1	12267.2	12586.2	12226.7	6160	3866	4983	48015	9111	12687	10449	11060.5	12078	7729	14741.1	11094	8072.23	11528.2	9335.67	9909.28	9594.13	10127	9949	6960	14988	11279	13755	28087	20495.5	35340	22639.1	32087	23164	6438	22887	20081.4	28127	35839	40807	24885.9	17629.1	8037.17	8264	23590	22546	26717.9	16755.3	19745	17333	16292
SLC30A9	2052	5578	3394	682	549.001	696	2403	2719	4053	2123	3517	5306	1838	5046	4544	2842	4400	2504	2252	3210	3376	3446	875.999	1377	3181	6787	9609	4855	4758	2865	3239	3589	1018	811.999	1630	936.001	1731	1921	4319	3626	2546	2876	3955	5408	4692	3744	5912	4912	2355
MTMR11	252	868.001	567	7	17	22.999	826.999	995	849.999	1714	1811	544	404.999	1664	975.001	1479	1204	423	857.999	593	952	1013	32	171	3386	2302	440.999	590	895	836.999	694.001	1182	1852	969	2544	1117	961	675.999	1843	1105	4371	4068	1887	923.001	2277	3654	455	4659	1661
COX15	1123.67	1735.45	1488.36	727.72	725.281	702.842	1612.61	1487.46	1769.27	2580.13	3009.54	3728.52	2071.28	2649.86	3317.28	1537.82	4026	2375.34	2635.65	2664.94	2724.68	2942.66	1034.64	1645.41	2763.72	4202.28	4032.08	2787.84	2707.46	1931.39	2748.93	1887.69	1510.56	1356.6	2663.78	1299.12	2227.16	2307.79	6310.55	2325.39	1400.54	1462.91	2976.06	2604.53	6305.98	4675.03	3839.93	2645.83	1993.44
CCDC88C	13	5	53	80	57	17	105	70	224	116	153	212	150.999	95	102	94.001	56	48	87	109.999	88	70	89	70	149	172	173	85	70	72	49	51	121.999	21	112	21	28	62	262	254	93.999	42	71	91	142.001	161	140	49	66
YAF2	946.999	899.001	1153	681.002	569	504	426.999	259	284	489	243.001	292.002	309	315.999	240.999	276.002	263	283	446.002	267	317	342	534.002	713.001	483.999	240	410	399.001	537	330.999	484.999	387.999	305.998	288	649.999	262.001	345.001	386	929	714.999	175.999	147.999	427.999	342	954.001	688.999	348	220	261.001
ZMYND11	2931	2092	2168	526.001	601.855	535	1035	709.999	951	898	792.999	1304	625.014	1012	870.999	703.998	876	544	778.01	681	805	944.011	1188	1524	1174	1415	1665	1092	1894	676	1356	1509	525	460.001	662.999	414.001	604.001	775.999	1693	1125	611	701	742.998	1241	1305	1198	1942	1306	484
WAS	0	0	2	5	11	9	10	4	5	15	6	1	2	5	4	1	7	2	1	0	2	6	12	24	14	4	6	5	12	11	14	6	5	14	6	16	16	6	5	5	4	9	10	13	5	7	6	21	15
DPEP1	155	10	31	2	2	0	0	0	0	1	0	5	0	6	9	1	6	1	0	3	0	0	0	7	2	4	2	1	0	1	1	1	0	0	0	1	0	1	1	3	4	2	1	2	1	0	3	6	1
BID	2467	2866	4942	2264	1242	1786	5713	2023	3067	3565	4526	6278	3828	5160	3927	2054	3090	3378	3506	3308	3491	2972	1955	4479	4834	5100	14296	7354	15411	9097	11530	17803	1794	4580	5315	9764	12792	14033	8503	8556	2720	3568	7922	6992	8074	7329	7615	7516	5959
MATR3_ENSG00000015479	6639.12	12258.5	7604.26	1610.99	1740.14	1570.3	4774.37	2931.75	4237.05	2730.66	5466.08	8492.27	2361.77	6303.8	6824.79	5090.59	6304.68	2077.47	2884.53	3050.81	5025.2	4711.61	2256.96	3367.09	5280.83	7312.51	10478.6	6518.12	7608.27	3828.92	5778.94	5142.78	2006.68	2728.91	2807	2876.47	3575.84	3592.61	6348.65	6282.05	5135.5	5086.32	5122.9	7673.59	4813.16	3608.29	10455.9	7619.29	3882.47
NPC1L1	2	0	16	681	1226	667	642	961	1162	5746	4484	9283	1974	2054	9156	1523	8711	4600	5030	4980	5278	5721	1209	2236	8297	4008	2960	3903	1660	2281	2209	1240	3612	2044	4465	1290	1886	2112	14232	2194	2969	2355	5189	3787	18112	10305	5418	4832	4618
XYLT2	706	960	1448	218	172	156	293	382	594	673	761	890	654.386	561	854	531	375	584	677.939	617.202	744	784	203.001	332.999	335	660	643.999	317	421.999	243	231	320	248	250	354.999	189	255	287.001	1278	735	605.001	566	563	657	728	536	536	687	412
RGPD5	345.673	202.508	472.979	4.651	88.718	30.743	357.519	74.595	337.671	495.793	371.745	484.627	278.387	60.071	185.111	372.105	196.143	426.379	424.37	410.633	548.549	353.593	216.672	169.492	502.889	416.489	396.484	383	413.552	260.303	8.772	675.733	375.271	357.42	218.549	268.236	294.816	414.514	742.947	442.63	277.57	397.691	174.95	337.1	978.087	863.766	340.729	455.151	196.085
STMN4	4	1	0	0	5	0	0	0	2	0	2	5	0	20	5	5	4	0	4	1	6	3	0	1	2	1	12	4	4	5	7	7	1	6	0	7	3	2	0	10	3	5	2	3	3	3	0	4	13
NUDCD3	1595	4359	3278	696	714	913.999	850	2301	2404	2420	4888	4958	1640	5573	4018	2973	4446	1737	2248	2141	3065	2877	1328	1972	3308	5337	8503	5412	4661	4501	2776	5396	1412	1611	3104	1786	2403	2686	3807	5122	2498	2886	5524	7383	3326	3092	3565	6188	3708
ISL1	1	7	1	0	0	0	2	0	0	0	1	1	1	1	0	1	0	0	1	3	1	0	0	0	1	2	1	0	2	3	0	0	0	0	0	1	2	2	0	0	3	0	2	0	8	0	1	0	0
CHDH	9	12	47.834	2235.98	1997.29	3160.99	1175.84	573.576	1004.81	7875.2	2411.41	1246.58	1791.16	1473.62	1602.4	825.973	2272.81	1879.87	2356.55	4000.65	3093.29	5655.12	5889.41	7489.59	11719.5	4781.73	1974.76	3912.44	3153.87	3581.42	4677.25	1691.16	4082.53	5616.07	3424.36	4200.73	4797.63	3760.59	4600.22	3253.53	6925.31	7651.56	4602.88	2629.52	5945.45	7315.39	5147.82	6879.13	6097.08
IL20RA	8	84	7	3	2	3	555.001	209.999	312.001	3	0	36	40.001	256	48.001	302	2	53	177.999	96	33	3	2	19	2	116	307	2	5	28	39	87	2	0	0	3	1	2	28	4	4	6	2	14	2	2	6	3	10
CLCA1	0	0	0	0	1	0	0	0	0	2	0	0	0	0	0	7	2	0	1	0	0	0	0	0	0	0	0	0	0	0	0	0	1	0	0	0	1	0	1	1	1	1	1	0	0	1	1	0	0
CLCA4	0	0	1	0	0	0	2	0	1	0	0	0	0	0	398.985	2.856	1	1	0	0	0	0	0	1	0	1	0	0	0	1	0	0	0	0	1	0	2	0	0	0	1	2	0	2	0	0	0	0	0
GLT8D1	3197.31	1850.01	3011.09	531	574	577	1319.02	639	734.319	1683.1	692.091	668.074	1097.08	769.048	683	535.998	608.007	511.049	1175.02	933.217	600	1009	1860	3633	2353.01	951.002	1463.36	955.368	1716.56	870.09	1512.49	1563.05	826.001	1232.88	873.02	1352.02	1506.35	1354.16	1985.01	1186.52	2185	1985.27	1117.99	1357.02	2135.33	1235.01	2452.15	2232.51	1149.1
ATP2C1	3673.87	5119.93	3679.94	351.165	375.079	265.392	2537.53	2096.65	3027.09	1536.76	2422.02	3228.61	1580.23	3617.43	2072.65	2945.7	1937.47	1620.61	1752.86	1805.9	2274.97	2053.04	787.696	1280.7	2135.87	3512.66	4952.76	2584.27	4326.45	1775.13	2929.02	3398.48	731.927	1319.8	1102.13	2091.84	2560.48	2941.27	3054.07	3036.75	1548.43	1685.97	2051.51	3481.96	2762.8	2092.13	3583.52	4777.75	1682.97
IGF1	287.796	28.981	34.095	6822.54	6657.32	6912.58	0	0	4.508	117.464	9.93	107.727	474.255	45.516	54.862	139.067	17.401	384.637	590.016	193.956	64.651	22.966	14706	6309.78	27.979	13.024	833.242	64.408	1405.72	20.288	44.811	1566.17	936.562	127.036	227.365	93.211	49.643	658.126	2441.63	224.309	143.641	104.347	8.94	813.893	954.082	1184.37	89.995	1068.27	35.352
SLC38A5	309	405.001	336	5	3	4	24	8	53	42	308.063	39	6	146	70.001	14	469	4	10	100	134.001	31	5	9	30	30	642	54	263.999	123.001	38	392	3	58	11	230	308	292	6	748.001	80	162	220.001	141	30	15	89	711.001	231.001
RALBP1	4382	2276	4612	762	771.996	712.996	2048.54	1018	1699	934	810	1002.99	805.001	1276	627.999	886.001	796.995	748.994	884.983	728	871	997.996	1442	1979	1186	1201	2492	1941	3377	1512	2425	3302.79	475.983	1101	1206	1436	1901	2234	1611	2237	652.001	727.976	1546.99	1799	2033	1334	1795	2040	1075
RUFY3	1088	415	798.999	263	278	174	350.001	151.002	139	459.999	208.001	115	199.001	214.999	124	278	128	164.001	299	241.001	249	254.999	885	831	353.001	139.999	209	276	663	271.001	383	353	303.001	430	499.001	494	377	355	719	368.999	344	293	293.999	199.001	668	657.999	228.632	409	323
CNTN1	6	2	9	1	10	1	32	8	239.001	2	2	3	10	1	2	11	0	2	6	1	4	3	1	0	0	1	4	1	0	3	1	0	0	0	0	1	0	0	3	0	5	8	3	2	1	6	0	1	1
SLC11A1	35	27	69	108	197	82	50	20	14	17	40	16	22	35	20	42.343	16	27	33.999	27	35	11	143	205	77	64	57	17.001	22.001	25.001	26	45	22	65	55	33.999	34	23	41	17	56	40	33	24	68	57	9	46	43.001
WWTR1	2620.09	2462.64	1289.18	337.443	423.584	304.184	1424.97	2129.91	2802.67	2841.2	6876.41	12263.7	1787.76	6133.17	8384.54	4844.57	11540.6	1885.53	2043.91	2681.03	4613.12	8304.09	376.7	725.614	4910.49	8653.2	9627.64	5101.76	5278.71	4139	5941.76	4183.17	440.245	1576.14	939.511	3562.58	5657.35	4545.67	2350.3	2912.6	2589.25	3112.65	8119.63	7663.58	1750.93	1642.7	5695.8	5883.9	5332.3
AGPS	1464	654	1003	459	522.999	513	1456	774	1252	1663	1304	1266	992.999	1180.02	930	685	1714	866.001	1442	1544.01	1622	2205	1091	1219	2689	2249	1472	2119	2284	1095	2738.01	1398	772	829	1257	1378	2019	1699	2500.02	1452	1554	1441	1995	1550	2814	1534	5027	2042	1489
ZNF285CP	0	0	0	0	1	0	0	0	0	1	1	0	1	0	0	2	0	2	0	2	0	0	2	0	1	0	3	1	0	2	0	0	1	0	0	0	0	0	0	0	1	1	1	1	0	0	0	0	0
STEEP1	367.25	530	593.886	174.955	102.775	174	206	239	377.247	357.81	456.621	800.7	276.856	524.79	537.806	393.825	606.001	270	332.979	325.885	517.943	471.86	177	250	397.938	603	1047.85	368.552	308	276	270	218	202.33	527.999	539.542	422	614.581	608.226	527	734.882	238.999	213	600.469	546	544	395.922	834.999	500.887	561
ATP1A2	89	1	4	0	7	0	0	0	2	20	4	10	7	5	4	12	3	4	16	9	4	7	1	5	30	21	13	2	17	3	0	4	3	3	1	3	1	1	9	8	18	8	4	2	27	20	6	30	3
TTC27	729	2519	1327	131	105	95	300	256	479.999	315	959	962	280	1173	1004	414	992	343	442	492	698	630	166	278	671	1280	2173	1610	1416	1213	1137	830	298	347	779	242	895.001	727	931	2263	652	666	1521	1645	664	557	1916	1125	1026
ZNF582	125.299	235.745	172.685	56	35.673	44.179	92.001	63	70.98	124.919	123.722	175.908	167.981	143.424	132.512	73.393	134.775	120.255	166.614	118.079	150.838	129.634	97.496	97.598	137.898	150.485	253.228	201.363	177.418	97.283	122.403	96.916	134.102	100.005	229.243	53.803	70.926	109.747	489.173	370.78	75.768	95.636	187.451	205.264	345.465	341.267	263.33	72.849	86.428
VSIG2	0	1	78	20	8	11	2926	2842	4209	174	134	217	212	575	235	877	124	50	132	186	178	130	10	63	84	365	455	42	96	77	80	791	0	278	11	126	69	63	33	709	59	154	74	72	27	0	43	394	116
PHLDB1	3379.61	1643.95	3485.99	5.193	54.526	2	44.019	117.295	215.155	216.009	297.964	652.972	274.565	387.816	384.524	318.56	311.525	125.692	162.741	182.428	434.737	205.796	6.371	38.666	147.389	194.954	540.555	470	1352.22	425.138	306.748	876.102	54.443	256.352	99.489	362.639	385.283	940.487	104.026	587.221	211.043	311.244	386.224	1075.39	150.614	137.383	296.427	1217.89	376.706
MARCO	9	0	12	154	323	442	0	1	0	0	1	0	17	7	0	35	0	24	26	1	0	2	250	1609	0	0	1	0	5	0	0	1	0	2	0	0	0	0	242	12	0	0	0	2	0	1	0	14	2
CYP24A1	3	23	13	1	4	0	28	223	9	0	117	4438	8	129	2762	7	47	1	3	1	26	55	0	3	2	551.001	810.001	775	3694	1621	3291	3384	4	3	0	408.001	1208	297.999	1	27	6	69	655	252	2	8	71	950.999	214
PRDM11	152	119	164	18	29	19	12	21	25	51	43	16	8	32	22	50	38	14	34.999	18	14	31	47	59	43	24	39	26	42	33	56	33	23	43	36	17.001	30	39	34	55	28	23	43	39.999	47	38	25	18	49
SYT13	1	1	9	0	7	1	3720	2596	2848	861	2627	1177	2039	1653	572	2683	1439	285	840	889	904	1821	0	22	1536	2376	1095	514	178	313	671	300	37.028	361	362	1139	1225	1103	373	744	875	628	1215	520	710	1527	715	1457	1286
SNAI2	11812	7683	7243	82	52	99	49	101	25	362	649	1754	138	951	1316	118.999	440	446	351	366	408	250	241	320	576	913.999	3490	828	3259	2062	1952	3770	241	747	627	1964	2727	4134	2713	2849	838	1301	2664	4954	1656	554	941	5428	1345
CD74	622	354	1621	2271	2699	2552	3805	9390	3085	3682	3321	19203	9069	7880	38223	9166	2697	3527	4314	2350	2754	4771	4142	16331	4493	8069	10888	3822	8273.93	3684	5783	5765	2834	7196	4458	6146	6324	6101	13049	4375	1627	1476.78	6990	2751	5326	4126	1711	2529	2839
HGF	4730	1094	2721	9	76.999	0	0	9	0	13	5	2	14	10	2	11	2	4	5	13	5	9	20	16	1	5	49	14.001	7	4	3	5	8	7	0	22	5	183	0	0	11	14	1	1	14	7	13.001	2	9
ZRANB1	1777.91	860.11	1890.08	671.036	735.479	623.086	634.447	286.899	307.787	364.623	217.692	241.973	276.117	318.933	165.709	299.756	222.93	281.958	282.722	223.693	243.631	281.123	1082.47	1436.49	462.057	226.919	471.915	348.47	829.124	246.185	546.266	729.792	192.943	432.937	377.507	462.472	392.615	548.233	603.657	542.903	195.812	188.962	299.962	319.538	630.239	506.812	346.385	657.772	263.49
NCDN	1082	1143	1652	64	91	83	175	298.001	603.999	393.979	577.552	924.842	422.001	501.99	636.002	373	774.001	329.999	484	612.999	752.999	659.143	268.001	276	364	629.001	1634.96	685.032	409	317	491.001	508	235	203	475.001	238	413	524	913	952	277	231.001	493.065	722.001	1199.81	992.972	692.994	529	547
ADGRA2	2940.72	1611.97	2047.76	4.574	51.038	2.721	0	3.618	4.083	4.383	4.566	7.921	29.273	5.487	4.908	9.964	10.056	2.206	10.329	11.727	7.539	8.486	0	72.65	10.28	9.973	13.059	4.008	5.701	7.268	2.766	2.489	58.251	0	1.684	7.985	6.145	76.408	2.745	5.048	23.379	47.992	2.786	6.893	9.866	1.914	3.503	12.298	14.601
CCT8L1P	3	3	1	1	1	0	3	0	1	6.745	0	1	2	1	3	8.108	4	0	4	5	7	0	2	2	0	1	1	0	0	6.161	0	0	1	0	0	0	0	0	3	0	3	8	2	2	4	1	0	8	3
ZFP64	469.999	794.001	592	67	75	77	108	201.999	343	410	524	664	295	517.999	681.999	493	652.999	366.999	526	449	512.001	450	211	260	627	688.999	971	656	670.001	555	469	598	239	313	487	248.001	477.999	497	954	856.999	424	300.001	679	707	737	651	1058	674	500
MNAT1	1233	1131	1296	408.999	364.999	285	1612	598.001	821	596	769	769	427	943.999	727	623	721	394	526	487.001	569	708.001	421.999	703.001	602	880	1677	1254	2187	1447	1711	1386	328	1368	1082	1690	2088	2133	803	1417	647.001	746.999	1604	1308	717	744	980.001	1131	1148
SAMD4A	1783	946	1073	542	945.001	360.999	266	279	146	1069	851.001	365.999	293	1341	255	423.999	390.001	213.999	393.001	302	483.001	562	1071	564.001	1353	623	2354	582.001	3514	1309	1264	5850	506.999	664	543.999	3138	2361	2158	956.001	700	1437	2282	912.001	1421	1122	1165	732	6607	1615
RUNX3	3	2	3	3	16	5	4	2	1	6	4	1	4	3	7	5	3	1	4	4	0	2	7	12	2	6	2	4	11	8	2	15	5	1	0	7	2	6	5	0	13	16.031	6	1	4	0	1	4	7
MRE11	777.991	1047	599	115	90	91	586.999	315.001	525.001	187	511.001	609	209	618	532	400	542	236.997	285.991	301	394.001	418.999	185	305	313	751.999	1263	801	762.999	688	727.999	627	180	318.998	423	280.001	581	457	535.001	889.999	314.993	440.998	670.999	818	346.999	380	886.999	663	532
PLEKHB1	9	16	31	5	20	17	850.001	2880	1710	289	3398	2584	1930	3833	2052	5256	1102	231	794	594	528	569	1	52	949	2424	3405	711	793	942	946	984.001	7	857	197	1018	1177	1039	335	323	363.001	519	1876	1166	47	122.001	373.999	687	1661
SERPINB1	3219	8853	3989	795	703	1175	20325	6440	10578	5319	3745	4096	4857	5773	3955	10589	3613	4406	10017	5731	4782	4383	457	2623	6965	6998	6973	4488	3850	3995	3017	3759	1511	2469	3787	2541	3568	3792	7648	3799	2516	2819	5320	3474	10011	8695	4153	5514	4615
CYP3A43	0	0	0	596.068	870.028	400.293	0	0	0	225.051	28.01	64.012	98.015	10	16.01	7.006	65.014	151.021	64.01	67.007	52.008	47.001	402.178	1002.06	90.008	45.004	3	10	9	7	3	0	46.999	41.001	3	4.001	6	5	211.019	11	6	31	12.003	4	259.039	402.045	15	1	18
SLC7A9	3	4	6	425.001	375	291	3	17	26	960	235	188	415.002	154	691	133	293	774.001	991.001	391	311	364	495	551	1366	369	19	175.999	45	204	229	8	342	312	550	113.999	199.999	78.999	1755	71	174	141	351	47	2313	1467	265	55.001	227.001
SPAST	359	263	309	127	140	99	300	250	286	341	216	447	292	315	229	337	289	331.999	362	371	386	290.001	258.001	377	327	341	347.999	281.001	339	185	357.001	201.999	171	196	217	193	207	278.001	656	457	189	202	217.999	223.001	660.998	470.999	475.999	191	190
NRXN3	1820	3851	4830	6	8	4	33	155.999	282	18	18	33	135	335	42.014	130	28	93.001	86	85.001	39	14	2	18	12	272	3082	4	66	9	7	542	48	1	35	13	12	73	52.999	3	39	26	16	525.999	32.999	37	13	258.001	60
OSBPL5	760	1012	1328	4	17	4	104	82	195	47	101	47	47	233.001	89	359	100.001	35	51	81	83	72	2	25	21	105	209	62	85	42.999	33	91	8	29	14	36	34	86	23	22	39	56	66	61	3	10	20	143	65
AQR	1527.77	1211.04	1242	316	323.951	299	976	677.332	1145	644.001	1237	1798	522	1524	1000	920.339	1636.1	663	701.999	952.099	1185	1088	640.999	864	959.16	1708	1647	994	1089.45	608	1024	959	365.001	535	391.999	661.001	852	936.999	1284	1190	726	843.999	742.001	789.999	1211	974.999	1980	896	629
CPS1	994	274	405	57144.9	32736	43582	12	165.999	75	10655.8	637.001	487	1870	702.008	556	402.001	1130.99	4644	6861.62	3012	884.001	657.999	73074	41876	4583	525.002	266.004	162	163.005	121.999	198	156	3357	1454	1473	244.999	366.999	337.999	13755	214.074	857	298	452	267.999	13658	6861	301	319	279.999
C8B	2	0	3	16331	9689	20485	1	88	39	7090	3866	94	887.001	2381	349	309	4851	4449	3652	4898	1184	2484	22716	34810	10312	1637	299.001	863	484	2050	877	71	1657	6837	2238	1245	2184	2040	5569	685	5511	1575	3043	1100	2651	1455	192.001	2024	4764
FHL1	34271	52371	39422	64	185	158	2	7	1	31	39	3280	285	58.999	141.999	61.999	25	75.999	159.973	80	91.999	57	88	263	31	90	4164	234	5130	1162	716	16874	122.998	104	143.001	279	175	1234	377.999	666.001	191	213.999	112	4783	174	505.999	161	3300	95
RTF2	6382	10687	11481	1829.94	1415.94	1815	3261	2525	3828	3827	5348	7118	2800	6075.95	5821.84	3327	5048	2827.92	3301.85	3497.94	4414	4430	2331	4091	5616	6650.98	10946	8639	9524	8016	7570	8805.82	2176	7285.98	6781	8435	9586	10064	7637	8772.79	3665	4099.89	8778	8722.93	8422	6341	7028	8371	7136
GABRA1	2	3	2	3	4	0	1	1	0	3	1	1	3	2	5	5	0	2	1	3	4	2	0	2	1	2	2	0	2	1	0	1	2	0	0	0	0	0	0	0	2	4	1	2	2	5	2	2	1
NLRP2	7	11	26	4	8	5	1027	600	1188	335.942	163.979	5	284.989	1573	574.967	1366.89	382	203.967	312.001	292.997	243.976	298.993	2	7	308	294.981	466.954	687.991	663.997	701.995	692.982	839.999	3	36	36.919	43	120.986	97.999	7	189	45	44.911	217.974	141.99	35	45	190	212.99	205.952
SLC45A4	167	79	121	4	13	4	430	155	393	63	55	66	54	104	30	110	33	23	36	66	16	54	3	19	66	119	142	134	53	104	210	84	14	46	59	27	55	49	61	19	20	8	32	25	44	6	30	16	50
RNF10	4355	2751	5787	1125	921	993	1806	1290	2340	4241.59	1595	2260	4384.47	1760	2498	1483.7	1296	4552	5268.52	5510.73	3738	4447	2175	2854	4627.56	4743.65	3724.4	3071	4661	2635.86	3641	4141	2224	2688	2484.1	3450	3392	3963	11340.4	4615	4264	4112.21	2537	3463	10756.8	7748.48	10009.9	7364.34	2906.84
ZNF839	134.373	53.734	244.028	114.525	114.57	87.486	191.79	155.946	119.179	260.831	203.15	112.31	116.959	178.925	99.27	147.851	176.406	60.657	145.01	101.572	133.516	174.029	276.439	305.09	232.165	208.358	270.4	254.894	370.404	172.57	271.185	295.207	174.057	199.219	213.154	170.48	248.001	260.445	283.619	118.63	158.605	184.076	227.164	203.457	264.048	267.298	223.471	282.408	259.219
ZDHHC6	2100.96	3116.28	2125.33	676.007	482.011	665.077	2827.25	1554.35	2490.53	1249.01	2553.28	2436.14	846.189	2940.33	2595.64	2097.97	2244.26	883.258	1330.32	1411.78	1905.27	1838.72	1024.08	1412.02	2543.65	3622.53	5542.23	3359.34	4327.83	3792.36	3499.42	3078.95	991.271	2290.01	2710.46	1840.98	4960.6	4106.56	1934.13	3969.36	2345.24	2840.89	3782.63	4056.83	2094.88	2706.31	3414.41	3212.79	3278.54
GRAMD1B	38	22	60	10	11	3	1050	1036	1597	562	892	373	395	859	333.001	1118	572	144	222.001	297	406	476	1	29	535	1008	1511	922.001	1359	718.999	799.001	787	107	565	266.001	272.001	496	758	178	710	614.001	558	610.999	706	128	126.999	300	1167	517
RNH1	13327	35415	33181	3436	2468	2852	1296	3598	7787	8259	9117	10504	4895	10713	10178	6575	9457	6218	7627	7232	9022	8170	3041	5716	9010	8894	16025	14069	6249	9411	4617	10076	4022	5921	11072	3827	4974	7325	17274	13889	5502	5140	11753	10870	16881	10844	17084	9857	10543
NDUFS1	2883.83	4731.06	3571.37	2516.29	1890.66	2524.11	4375.45	3932	4663.07	3688.68	4176.52	4485.14	2334.01	5309.25	4594.63	3115.02	4299.52	2944.52	3639.28	3785.04	3690.11	3174.32	3104.06	5747.02	5755.47	6911.76	10143	6388.68	5692.02	5459	5021.02	5639.01	2265.64	2351.68	5487	1722.02	4566	3999.03	8087.01	6303	2684	2733.04	6613.02	6204.01	8076.03	5441.52	6536	4212	4001.03
RB1CC1	4781	5173	2815	893.999	871	731	1554	999.001	1108	606	1288	1531	534.999	1513	1155	773.002	1247	490.999	612	675	865.001	956	1178	2313	870.999	1247	1804	1103	1674	877	783	1335	500.001	932	958.001	1144	934.998	919	1794	1594	1228	1241	1090	1071	1634	1139	1354	1400	923
ERP44	5804	5296	4233	2468	1747	1958	5592	2551	4413	4046	3319	4080	2737	3709	3577.93	2803	4176	2962	4120	4099	3480	3503	3729	5950	4504	4944	7431	4265	6136	5369	5283	6103	2188	5093	4734	5061	5884	5603	9500	5390	3775	3074	5205	4859	8878	4786	4966	6867	4865
ALAS1	1410	2499	2081	19327	8994	26697	1924	2879	3687	3794	4258	3522	6513	4059	4618	3114	3781	5845	8413	4834	4088	3034	3275	24531	4545	6589	9016	5326	5788	4762	3837	6226	2123	5950	5591	3486	5036	4850	21030	9718	2561	2415	6380	5711	22249	15130	9667	4502	4774
BIRC3	45	20.003	195.999	168	279	303.122	3480	1675	749	2503.69	579.997	342.998	925.001	2133.96	411.001	856.954	417.999	911.99	1030.99	1285	366.978	550.996	1047	1146	4730	478	2893	509	1075	849	1025	5018.46	407	733.998	653.994	3988	1712.33	861.999	871.996	476	725.106	1022.99	959.999	191.036	837.158	1582.99	483	1507	1679
AKAP11	1686	563	1009	489	444	391	868	505	450	557	421	384	379	472	268	418	445	255	332	293	302	584	553	740	530	405	726	485	740	375	651	666	298	415	488	419	507	603	636	648	344	351	553	533	548	668	401	861	536
GLRX2	2155.18	1265.09	1748.96	1074.8	816.714	805.458	1755.52	882.924	1469.1	1314.72	873.346	981.64	782.876	1023.63	886.419	821.023	1112.3	840.133	1020.33	972.545	1027.71	1114.78	1179.52	1698.33	996.86	1004.47	1463.98	1598.38	1390.09	1231.33	1738.88	879.944	669.999	884.494	1570.37	955.644	1421.32	1417.17	2357.1	1808.36	685.945	669.173	1423.57	938.141	2277.6	1718	2180.17	1001.3	1021.53
SNAPC1	1418.44	1754	1472	84.021	91	65	814	369	406	220	666	1003.21	261	1212.82	511	368.191	668	288	176	286	600	497	97.027	180.022	284	794	5941	1671	5824	1756	1514	6074.05	146	907	433	2508	2513	2974	536	3337.88	677.767	1469.1	1745	4811	441.879	363.176	1708	3412	1162
DERA	1850	2376	2549	2433	1423	1852	4335	970.001	1867	2563	2279	1053	971.001	2501	1257	1213	1651	1489	1785	1407	1729	1269	2158	3386	3895	2613	3059	2379	3736	3974	3692	3155	1345	4532	3373	7591	6506	5267	3721	3588	2081	2326	3648	2723	4312	3432	3068	4488	3852
STRAP	8262.99	13132	11774	1670	1226	1608	10080	5517	9017.99	5953	6321	9934	5982	8799	8673	5307.99	7900	6046	6840.99	6557	7893.99	7434	2032	3294	6138	9346	17904	12080	14102	10349	12156	13258	2524	5901	7576	8166	12298	12818	12670	15541	3513	4230	10799	11886	13106	9910	17265	10491	7910
ABCC2	17	7	167	4537	3612	4107	1540	2188	3754	18806	13214	15972	11938	4275	9959	2591	18590	12173	16044	16239	13865	16649	6801	15129	18445	16996	1841	10291	2695	3771	6358	1239	22422	6018	22457	2195	4443	2739	54551	20123	15920	8761	10286	2192	55508	50657	20058	3797	6106
DEF6	15	0	27	6	34	6	16	11	24	7	14	11	25	12	18	13	7	31	23	34	6	4	33	55	14	18	26	10	7	12	13	3	13	8	20	12	17	10	39	9	8	14	23	14	65	27	6	6	6
PLEKHO1	2427	1131	2778	12	69	15	37	40	43	62	105.999	37	46	112	36	64	40.999	27	40	61	71	23	23	120.001	66	41	93	164.999	433	156	144	169	35	109	32	181	187.999	274	98.001	197	80	85	84	199	128.999	323	173	302	121
GCLM	2406	818	1289	2900.99	2343	1941	542	286	711	2569	420.999	312	3602	351	315	388	653.001	1707	5649	1419	716.989	1151	1752	6513	1830	591	463	943	614	318	737	326	2341	268	3829	293	412	330	22980	4683	1390	402	519	245	23091	6170	22649	296	323
UBR2	1349	835	1195	558	534	511	997	603	693	808	739	802.001	432	943	478	619	776	383	414	558	622	646	1026	1330	854	746	792	584	975	436	702	827	503	476.999	599	572	638	662	1284	888.999	676	723	711	614	1290	954	734	1090	547
EHD2	7482	25134	15973	21	28	20	134	1090	454	1942	2007	20	183	3551	209	1871	1818	387	290	816	1997	210	13	82	2274	715	1417	1063	2382	1338	198	3418	37	214	224	660	1101	1987	141	1570	1354	1280	1561	3775	524	801	452	11047	2421
DEPDC1	218.977	192.377	125.704	11	8	0	334.374	158.124	899.091	33.174	330.908	288.953	64.001	869.368	257.077	395.413	472.919	340.837	297.793	333.764	760.791	296.284	8	172.001	41.043	367.999	1179.35	1084.56	1017	775.947	767.644	822.73	5	33	12	237.185	546.39	758.368	76.127	543.199	39.022	379.238	416.552	955.18	42.574	49.976	2410.15	743.2	330.533
CCDC28A	1337	1189	1671	1603	1276	1322	6441	1127	692	629	627	846	567	786	702	479	635	494	605	464	552	598	2571	2921	645	688	736	627	954	732	992	598	430	1729	1633	1590	1436	1173	1372	848	410	588	985	503	1192	987	726	547	795
RRAGD	11	2	21	200	189	110	331	149	44	350	267	161	209	390	235	136	213	193	214	186	219	283	248	498	469	118	215	416	567	300	625	273	102	364	287	314	349	353	397	219	273	217	433	282	776	618	348	555	328
HSF2	691.995	1042	560	50	60	78	467	202	274	210.995	465	797.999	220	575	552	222.995	515	169	221	239	421	372.997	171	232.986	271	620	1242	908	1601	787	766	1084	173	498	389	376	639.996	598	564	1395	355.992	525.988	742	1138	311	344	1033	927.996	478.993
PHF20	3858.11	2729.18	3423.22	430.999	389.033	417.999	1773.14	693	825.085	662	1034	845	506.011	1409	780	781	912	403.999	615	530.999	807.999	848	645.001	834.001	804	984.001	2473.08	1519	3668	1828	1909	2754	448.999	2000	1193	2515	2427.02	2525	1433.24	2086	781	818	1688	2021	1087.25	1084	1272	2139	1607
HSD17B6	305	395.001	163	37609.3	23858	23136.8	4.005	68	10.003	14905	4766.8	2804.03	4853	2071	2088.01	466	5950.54	10747	9741.68	6658.02	4076	4606	74227.3	62465.7	8209.59	2816	192.001	1090.01	1628	1781.2	2354	226	8484	21212	13726.8	4614	5387	3773.87	23507	2640.83	3034	3091.01	6008	1500	10984	7115	845	2324	5132
NR1H3	179.282	214.664	271.044	1770.27	1495	1550.82	221.999	348	436.492	2451.36	1475	1059.26	893.057	1122.61	1695.78	364.462	1591.67	1347.75	2028.68	1524.88	1230.94	1404.8	2504	2956.2	3413.79	1531.45	867.275	1438.31	793.145	1474.51	1348.23	702.343	1385.01	2513.29	2623.51	1024.6	1490.36	1253.31	3511.5	993.473	1509.16	1034.38	1794.69	1136.78	4826.26	3409.73	1133.83	1735.55	1997.39
TYMP	251.936	66.059	185.707	110.554	193.7	64.655	40.268	112.237	55.284	2117.59	152.102	57.624	450.543	227.33	137.339	231.175	90.236	330.928	2293.93	551.322	228.112	120.499	317.247	2881.67	4770.56	145.283	160.974	140.409	197.382	190.788	139.277	119.357	1481.68	267.3	430.356	159.001	206.166	114.851	2477.45	286.033	857.773	528.547	215.884	125.065	4842.13	1300.51	476.972	393.802	509.012
NCAPH2	1089.61	1569.53	2000.62	930.561	612.016	896.751	404.612	596.388	2004.81	1561.81	2169.3	1856.64	571.274	2749.92	2085.08	1367.67	2097.91	1044.64	1339.03	1617.87	2178.63	1606.45	762.025	1378.24	2268.56	2399.92	3935.12	4607.67	2783.11	4213.78	2430.46	2612.58	919.858	2722.19	2161.26	1945.12	2946.17	3521.22	2144.81	3657.39	1336.87	1459.89	3033.03	3070.52	2066.88	1476.83	5051.68	2707.34	3239.16
TOMM34	1480	2921	3551	414	385	531	3031	1534	3717	2065	2450	4407	2365	3080	2986	2628	3096	2332	2933	2442	3147	2907	516	1170	2252	3615	5128	5127	4144	3645	5072	2185	1121	1899	3776	2327	4311	4477	6832	4841	1262	1292	4281	3329	6904	4369	5975	1864	2491
SEC63	8632.67	4651.36	6601.69	2929.5	2582.64	2522.8	4469.82	2201.47	2622.9	3169.01	2490.36	2654.6	1600.21	2820.41	2332.35	1751.74	2334.44	1430.49	2103.03	2290.72	2196.96	2608.48	4046.34	6225.49	5045.05	4369.07	5193.09	4197.2	6767.42	4283.39	5612.43	4855.51	1524.85	3702.62	3669.88	3013.68	4807.72	4234.65	4050.41	3844.68	3145.41	2535.94	4249.94	4986.16	4345.98	3119.68	3779.59	6857.32	3762.14
KPNA6	4234.03	4833.17	4813.05	921.796	935	1072.65	2171.5	2056.58	2963	2252.51	2436.12	3415.66	1740	2848	2568.91	2190.57	3481	1994.81	2218.86	2425	2762.24	2509.92	1583.76	2350.41	2735	3404.72	5022.04	3241.63	3823.94	2370.36	2847.56	3377.47	1196	1471	2060.31	1717.47	2556.75	2383.61	4066.44	3117.48	1589	1610	2761.72	3140.69	4465.98	3437.48	3462.62	3036.01	2260
VIM	148543	91837.2	188709	141	380.974	136	777.708	2714.7	662.339	5748.27	9329.88	3858.66	7637.57	12558	3940.47	18055.2	11637.1	1569.92	2774.9	4372.26	8126.96	8270.87	120.005	2654.72	4155.87	2789.62	11817.5	14239.9	22319.1	7701.72	8051.67	5997.84	290.907	2834.07	1387.68	19300.9	14799	26284	1586.08	10150	4246.36	5047.32	9930.84	9921.6	3640.51	8152.95	11712.5	21762.7	13599.9
RTEL1-TNFRSF6B	67.868	145.728	100.991	22.307	44.982	20.501	38.951	22.436	34.193	137.617	55.532	97.13	55.39	54.116	45.192	79.564	46.602	83.058	117.418	138.605	178.124	85.335	46.052	125.298	223.132	64.448	160.004	137.875	92.582	119.785	60.637	91.6	119.297	29.75	127.049	13.818	65.652	29.654	149.274	151.887	43.997	38.812	59.575	84.653	147.047	115.98	86.226	109.374	63.517
FAS	3974.26	4749.17	3098.03	441.58	291.565	232.001	3128.32	1269.96	1783.64	2825.43	3211.62	3150.37	1837.76	2894.12	4682.86	1783.24	3334.37	1712.19	1679.77	1811.2	2282.83	3583.81	459.962	570.341	5027.2	3272.43	4733.01	3033.34	2667.07	2296.84	3508.92	3306.97	878.065	2061.87	2230.7	1771.85	3330.46	2838.91	4061.21	6352.43	2409.93	3038.55	4865.12	2874.94	3251.56	2663.92	5192.66	3215.06	3450.5
RNASET2	558.69	440.15	1229.68	296.998	322.001	246.001	4177.82	650.105	801.604	2101.61	417.999	448	2663.62	466.592	484	478.733	295.001	919.409	3335.49	1535	443.001	874.519	587.001	1649.76	3487.91	906	839.595	807.999	1314	888	1355	1545	1295.23	536.01	484.649	609.551	1066.05	855.649	6425.94	1061.6	1861.76	2163.66	780.999	873.001	7990.67	3629.11	4396.82	2091.9	979
CD44	10647	22063	12805	13.001	39.999	32	11268	15925	16573	6333	21538	21491	3995	17631	27891	21306.5	25347	3187	4253	7610.99	4996	26153	43	212	10949	46281	20987	5405	3118	7444	12732	5363	2158	5820	6126	24504	19981	20177	8759	6056	13560	7060	18709	11338	10593	10167	6309.99	14450	16651
KCNG1	674	33	126.999	2	12	0	8	3	5	15	17	4	11	14.999	23.001	27	13	10	11	7.001	6	11	2	4	2	6	16	4	9	9	8	304	2	6	3	5	5	23	14	3	22	25	3	11	6	9	5	11	5
AGPAT4	354	328	402	6	31	2	112	110	144	56.999	163.999	74	110	473.999	124.999	459	127	63	109	104	127	63	4	51	62	80	562.001	105	560	223	158	549	23	51	8	201.999	224	228	53	131	163	276.999	165	430.999	36	85	27	745	196
SLAMF7	0	53	21	3	18	3	2	44	34	9	14	37	37.999	709	75.001	35	11	49	36.886	27	30	8	11	25	1	27	7634	10	118	9	1.003	172.999	5	0	1	0	1	6	2	89	7	6	3.026	60	2	6	9	103	121
BTN3A1	570.004	674.229	840.507	77.994	75.304	134.315	217.384	410.623	203.036	578.226	480.547	633.537	157.059	659.655	711.858	333.238	567.848	332.353	274.268	326.264	320.343	388.09	382.82	416.503	693.522	434.109	585.278	395.149	444.604	357.474	407.804	500.348	184.647	308.631	254.883	332.481	266.57	191.553	561.116	348.323	586.69	680.707	538.039	352.82	326.077	258.406	242.381	792.563	408.29
MIPEP	700	1430.05	792.029	306	257	278	2060	1081	1786.06	1123	1832	2177.45	792.995	1947	1784.45	1199.04	2048.74	873	1042	1079	1584.74	1582	356	675	1234.93	2919	5318.62	2939	2447.63	2781.03	3073.02	1571.02	557	783	1361	968	3696.03	2672.3	1717.04	2013.08	638	885	3249.02	2893.04	1817	1452	2815.01	1404	2326
PRKCH	68.217	143	49.999	12	43	19	464	224	305	47	74	206.001	212.001	198.999	163.001	317	43	119	176.908	128	85	89.999	62	51	120.001	403.766	965	76	300.905	154.999	278.001	717.999	21	50	20	242	237	226.999	153.009	75	185	122.001	121	389	74	122	109	275	89
INSRR	4	2	3	0	5	0	0	0	0	0	2	0	3	4	3	10	1	2	1	3	3	3	0	1	0	0	3	1	0	0	0	1	1	1	0	0	3	0	0	1	5	6	2	1	1	0	2	2	2
IFNGR1	9278	8644	3239	1637	1027	1826	10171	4403	4549	7250	5339	11756	3960	6646	13653	3174	7412	3592	5191	4077	4691	8026	877	2076	12800	14675	20381	12857	17715	9586	14745	19960	2362	6478	9765	6128	14044	13545	12283	10973	4440	5052	13929	9313	10346	9192	14314	10399	9181
B4GALT7	723	1684	2080	302	349.001	341	231	652	1070	1190	1228	1850	943	1047	1621	718	1302	958.001	1019	1033	1169	1614	794	1168	1498	1914	2277	1750	1342	1369	1286	1209	570	761.999	1395	687	1049	1552	1753	2022	632.999	703	1853	1577	1955	1389	1830	1220	1352
SH2D2A	7	6	5	2	2	0	2	2	7	1	13	7	2	10	9	5	10	2	3	4	10	6	2	1	8	14	7	6	7	13	9	2	1	1	4	1	1	4	4	7	4	4	2	2	1	6	7	5	4
VRK2	850.917	935.341	790.218	86.014	100.874	124.52	2188.53	454.879	801.924	426.529	734.929	713.28	467.138	1099.12	697.168	645.184	642.45	456.712	658.416	476.743	826.211	548.068	180.377	349.163	614.099	1044.67	1717.34	1446.44	2176.16	1465.07	1385.75	1511.03	288.198	897.781	896.402	1510.54	1845.84	1912.24	1207.57	1767.11	675.942	895.923	1350.32	1375.2	949.735	872.141	2122.39	1539.43	1104.33
TNFRSF1B	748	546	1066	191	247	230	95	137	213	460	170.001	26	331	162	198	175	94	408	560	763	391	200	263	657	697	186	57	508	124	123	110	39	211	139	211	77	61	144	1474	522	505	432	127	20	2038	1655	2874	176	213
VEZT	1798	2657	2230	475.999	350	482	1492	1511	1729	2202.02	2457	2302	1220	2942	1973	2339	2766	1657	1614	1778	2248	2161	836	1100	2573	2813	5170	2846	4396	2784	3230	3553.01	938.001	762	1709	1033	1942	1915	3209	2863	2035	2659	3209.28	4373	2307	2487	2265	4759	2256
POU2F2	32	17	61.001	12	31	9	10	2	2	16	4	8	10	12	2	17	7	9	8	10.073	11	11	21	68	10	10	37	13	10	13	8	32	14	8	6	11	3	10	20	4	18	21	9	9	46	16	9	9	11
BRD9	1034.99	472.001	1643.98	171.794	246	204.001	555.141	365.001	527.959	736.999	466.07	439.973	465.999	499.929	321.693	390	366.001	246	604.347	448.844	425.835	487.442	544.999	680	976.859	685.789	1106.86	797.97	1367.77	691.972	1043	797.889	417	399.872	518.739	549.91	836	1052.79	650.877	1005.96	557.597	626.9	700.955	845.871	758.916	788.769	1219.99	788.91	672.819
SNX1	4197	5358	5079	1729	1179	1472	4166	2539	3644	2381	3940	4969	2214.83	4550	4541.83	3059	3985	2200	2714	2591	3390	3367	2245	3409	3576	5661	8244	6477	7417	5686	6132	5376	1954	4741	4541	4057	6966	7447	5466	5599	3551	3145	6289	5820	6122	5664	4990	4811	4981
TBPL1	1756.73	1623.79	1581.71	283.361	252.972	253.379	1483.73	391.009	731.311	563.05	822.958	806.16	529.209	932.432	699.685	547.851	759.844	439.685	526.971	471.943	529.434	710.033	390.128	768.353	656.173	822.967	1600.52	1237.33	2130.24	1316.48	1832.78	1256.96	336.31	1190.24	887.607	1593.91	2132.93	2093.1	1262.76	1960.47	416.481	450.67	1326.12	1265.95	996.208	612.842	1485.9	1000.14	945.507
BMAL2	195	91	309	79	36	71	382	195	269	141	115	114	154	322	55	191	121	151.999	237	190.001	151	167	86	152	197	102	349	241	351	175	378.999	376	110	88	177	169.001	244.001	309	322	225	144	90	186	149	326	239	475	301.189	166.001
BCLAF1	6065.17	4476	5627.95	1437.86	1195.31	1096.13	2705.68	1602.27	2535.18	1963.36	2695.16	4319.82	1481.18	3266.59	2242.95	2486.94	3251.59	1442.84	1803.39	2267.68	3080.46	2676.25	1589	2410.45	3662.28	4734.33	8449.11	5676.74	5874.26	3771.53	4784.22	4163.18	1214.79	2068.28	2435.85	1502.81	3274.12	3234.55	4199.54	4377.35	2119.47	2794.84	4800	5382.79	3984.05	2494.91	4184.23	3842.58	3377.75
SLC39A9	1924.99	2131.09	2189.54	939	837.015	912.118	2807.07	2766	2947.21	2814.03	3614.26	6699.07	2399.01	4311.09	2819.39	2956.05	4957	2447.11	2877.61	3298.12	3088.01	3637.08	2400	2820.03	3080	4657.11	4519.04	2244.03	2981.05	1818.09	3162.05	2988.02	1278	1662	2183.14	1910.88	2409	2348.06	4699.2	2454	1815.09	1677.46	2617.25	2562	5068.16	3267.06	2806.07	3003.81	1793
ANK1	11	5	21	3	9	3	125	35	126.999	35	149.001	84.001	17.821	92	63.999	77.406	114	10	37	41.999	180	69	3	4	227	30	104.999	538	166	198.999	103	195.999	3	77	3	86.35	100	139	19.147	293.001	152.001	207.872	167	283	27	23	172.001	541.222	156
IBSP	3	0	5	1	1	0	0	0	0	0	1	0	0	0	1	6	1	0	3	1	0	0	0	0	2	1	0	0	0	1	0	0	0	0	0	0	0	0	0	0	1	5	0	0	0	3	0	0	0
TFB1M	781.16	553.41	1054.97	397.562	234.298	291.985	2871.48	473.091	643.812	694.896	916.732	1009.57	344.725	1210.34	733.919	539.032	657.977	319.509	385.28	402.503	546.411	702.502	447.176	911.888	1168.42	797.132	1394.65	1361.91	2271.33	1749.88	2521.75	1502.39	251.502	1323.18	605.412	2803.55	2533.28	2082.68	570.244	822.37	509.401	917.961	1720.39	1241.12	650.378	878.109	1202.91	1959.27	1855.82
RABEP1	2210.99	1748.31	3080.75	446.154	543.317	515.377	793.587	689.501	1125.84	1184.6	773.009	1245.49	1050.33	897.43	1486.36	836.951	506.893	1050.6	1358.77	1334.77	1381.59	1413.82	715.027	1145.37	924.218	1295.96	1216.82	1289.45	1729.43	939.411	1049.09	849.401	779.785	824.903	1237.68	516.824	959.178	692.865	2415.09	1798.85	1224.48	1117.83	916.89	1404.1	2560.39	2571.43	2033.51	1156.29	900.279
HMGB3	1198	591.975	1088	1928.96	1212.96	987.993	4212.98	1136	2322.98	1086.99	2590.67	3612.98	885	3124.98	2212	1595.96	1959.98	1083	1181.99	1395	2174.99	1390.98	2462	4692	1780	3054	5631	4622.99	7653.99	4931.99	6090	3422.99	487	1524	1106	2665	4431	5303	1844	5345.92	653.986	1151.94	2900.99	4828.99	1665.98	1169	5604.99	2476	1988.99
NUP160	1082	885	1022	292.999	228.999	270.999	660.999	523	1160	586	1622	2568	327.001	2066	1349	950.001	2057	673	706	938.999	1434	1215	501.999	483	1158	1938	1936	1273	1709	1112	1431	1496	430	809.999	431	1205	1322	1322	1162	1416	1175	1657	1141	1338	882	651.001	2197	1791	954.999
BAK1	334.959	1650.97	999.99	68	74	157	222	1751	3603.91	1830.92	2276.1	3454.95	1466.96	2935.99	4597.89	1841.9	3323.96	2330.99	2687.99	2745.94	2801.97	2410	82	230	1764.99	3231	5274.97	2996	717	1656	707	1621.99	919	469	2306.99	350	596	1049	3838	3915	1150	834.988	2313	2677	4450.96	3869.78	4075.99	2071	2135.99
MUSK	6	18	15	0	6	3	0	0	1	15	1	3	7	7	1	22.999	8	3	5	9	8	2	0	4	1	4	3	1	0	5	0	4	2	1	0	0	3	0	2	0	13	23	4	0	5	2	0	2	6
IKZF2	25	9	9	8	18	17	23	57	16.801	62	16.143	27.645	45	52	16	92	22	21	45	44	17	35	30	46	40	14	64.765	21	23	28	18	132.001	18	14	11	8	23	45.999	8	7	31.001	46.999	30	44	16	39	15.021	43	34
GRN	16303	53093	30930	3288	2205	3853	4501	14886	12802	13360	26214	29645	9567	22933	32059	15848	25404	8248	9194	13135	17397	19963	3841	10638	20272	27823	26350	22026	14200	17875	9564	15406	6205	18418	17710	10255	13668	12757	26211	30898	11723	11789	25746	23404	24341	18183	15224	31164	28429
FAM13B	689.094	673.798	699.033	51	64	47	246.98	112	346	240.918	219.931	671	290.035	237.353	405.874	350.448	453.448	345.581	372.997	304	433.003	420.547	130	133.001	215.999	195	472.455	330.999	279.77	209	288	247.999	143.002	134	158.772	170	137	213.999	829.668	666	154.734	203.981	241.999	313	838.338	809	483.001	426.085	198.943
ARHGAP31	723	580	960	8	21	8	3	6	9	22	12	10	65	110	4	93	13	17	45	48	45	16	4	44	17	15	111	7	45	15	13	100	17	3	46	8	8	31	32	32	54	20	12	19	39	53	7	16	15
CENPQ	166	140	163	36	32	27	400	127	290	54	179	134	96	279	187	169	194	123	137	138	200	130	38	116	64	107	297	291	386	369	366	290	34	194	107	284	370	316	107	340	155	154	261	289	105	65	357	329	184
SARS1	19103	24677	23330	3363	1753	2622	15504	5259	7771	8399	12525	11898	4619	16832	12321	6730	10646	5828	8355	6997	7990	7714	2755	6423	12350	13961	30811	15458	30458	18147	16494	26035	4815	24303	23492	25526	23687	27031	21155	22398	12124	10095	18984	20650	18083	12798	14623	20905	15197
RANBP3	1284.94	1843.99	1791	391.882	366	431	562.999	708.001	1428	960	1481	1774	590.999	1658	1443	1008	1316	678	910.002	994.999	1341	1255	583.001	951	1345	1606	2856	1933	1524.91	1409	1212	1661	496	892	1130	966	1210	1291.95	1513	2426	891.001	783	1560	1814	1267	1032	2039	1457.92	1236
ARID4A	1711	1156	1674	904.001	770	704	1272	414.001	435.001	616	668.999	452	280	660.001	393	445	525.001	227.001	256	290	351	534.001	2121	1726	906	581	863.001	647	2017	869.001	953	1149	523.001	1609	913	1007	1002	1000	1150	994.001	904	1072	986	976.999	1406	821.001	644.999	1549	1046
EIPR1	603	1356	1489	281	253	302	563	803	1464	1259	1142	1573	776.001	1359	1421	944	1324	722	970.999	998.999	1069	1125	401.999	838.999	1639	1666	2693	2269	1799	1894	1962	1465	493	1168	1394	1075	1812	2157	1573	1854	789.001	697.001	2132	1923	1640	1589	1615	1495	1530
PNPLA6	2128	2431	3710	412	509	569.001	412	1095	2022	2325.13	2995	4781.49	1503	2525	3633	2179	4146	1619	2136	2402.54	3653.38	3143	1200	1654	2266	2625	3458	3317	2034	1922	1721	2313	1181	1154	2074	897	1410	1712	2927	2754.06	1641	1307	3192	3059	4086	3006.59	3086	3516	2855
IFT88	694.999	936.001	531.006	362	300	377.001	607.999	417	641	766	1478	1123	506	1110	1061	625	1662	515.001	640.336	756.999	1144	1101	469.999	757	1273	1675	2432	1947	2220	1902	1647	878.999	455	752.001	1132	761.001	1592	1180	1159	1829	1367	1780	2548	2374	924.999	881.001	1800	1886	1511
ALG1	3084.99	4337.89	4383.92	786.956	515.874	686.522	1690.11	2147.39	4269.31	3438.98	5116.03	7117.64	2393.61	4471.36	6951.25	2228.62	6417.42	2759.89	3528.16	4062.36	4932.82	5436.08	1021.75	2335.52	4983.14	7616.69	10781.6	9272.13	8388.22	7598.36	8405.53	4872.69	1943.53	6342.68	5604.33	6175.87	10457.5	11199.2	8374.38	9297.4	2385.69	2295.78	10189.4	8065.29	9573.05	5040.6	8601.07	4823.18	7251.18
ZCCHC8	1057	752.999	594.999	193	213.999	222	414.999	248.001	411.001	484	614.01	616	285	655	678.001	466.001	635.001	266	369.001	381.001	437.999	530	437	647	690.001	791.999	1166	794	860	714	717.001	661.653	358	461.001	725	285	464	431.998	1013	1131	704	733	835	860.999	910.999	630.001	874.999	823	497.001
ABCF2	3098.89	3968.89	5090.63	405.606	312.817	483.777	857.714	995.696	2399.63	1290.26	1905.93	2709.76	990.568	2133.14	2614.18	839.948	2151.93	1018.68	1216.8	1519.67	2049.36	1841.52	525.692	1206.25	1368.2	2976.53	6337.08	4899.55	3738.57	3299.37	3493.33	2413.86	566.275	1196.16	1988.11	958.04	3321.19	3398.18	2783.2	8152.18	639.187	785.4	3619.37	3511.35	2590.6	1896.18	5420.23	1274.53	2118.7
CHPF2	1164.01	980.266	1692.09	198.086	177	211.001	231.547	470.711	918.932	1276.6	789.171	1329.58	859.706	625.905	1061.49	804.862	783.131	817.093	1036.94	1201.45	1215.93	1223.33	290.397	607.519	873.352	986.01	1752.95	755.718	829.452	472.761	629.663	1005.44	497.728	287.597	589.393	401.231	475.764	628.316	1759.91	1350.33	571.729	453.481	673.196	923.712	1586.84	1227.14	834.315	1194.73	785.809
LRRC7	58.999	145.999	90	16.001	32	11.002	11	17	16	63	20	162.985	63.998	63	67.001	92	35	25	49	42.001	36	30	25	28	47.035	49	53	20	108.001	43	45	302	15	11	6.343	51	171	88	21	9	50.999	57	65.001	429	58	48	8	173.999	38
FUT8	1474.45	1509.63	1379.45	7	18	18.839	1630.44	1097.09	1177.6	85.772	530.261	290.448	337.665	1496.28	379.443	1646.38	319.843	280.331	452.985	327.512	391.787	241.237	59	79.567	218.055	325.375	1461.56	577.752	738.958	468.906	442.962	1112.54	58.756	192.153	170.553	288.506	395.119	470.955	249.754	987.338	222.217	399.784	551.084	686.741	115.208	180.764	454.847	765.423	455.225
UBA6	1061	886	1051	273	193.001	181.999	1274	1155	956.999	823	1134	1586	761	1837	735	1366	1161	650.001	860	971	1138	964.999	672	684	1046	1044	1651	933.999	2107	767	1144	2259	669	619	575	1040	1055	1272	1698	1093	897.999	1265	983	1012	1494	1680	1092	1896	806
GAB2	532	362	515	41	94	32	128	168	165	180	210	237	164	390	183	287	109	78	102	142	147	96	96	101	251	248.999	537	236	360	216	204	863	130	217	163	221	162	172	241	201.997	124	126	121	179	255	387	87	351	192
ATP6V0A1	833.999	2224	1380	827	794	949.998	337	1272	1832	3302.76	4720.19	7709	3316	3595	6111	2644	5823	2763.76	4012	3651	3688.12	3840	1483	2639	3995	6881	6484	3669	1817	1776	1345.96	2445	3304	982.001	3929.18	842.999	1355	1440	10861	2874	2924.93	2053	3230	3484	11185	9528	4555	3718	2950
PIAS1	2979.65	2732.56	2100.85	882.525	771.717	391.096	3202.99	1132.47	1122.76	1140.13	2137.73	2132.61	786.698	2158.12	1794.75	1165.21	1687.52	529.664	739.04	815.203	1478.68	1429.44	598.295	912.39	2001.87	2402.92	3185.98	2842.92	4511.46	2619.39	2679.95	4692.26	798.577	3070.09	1830.08	2268.63	3102.48	2933.73	1876.77	3034.25	1584.01	1818.18	3009.28	2671.81	1706.91	2096.41	1989.99	3347.24	2458.96
SLC4A7	1734	390	1146	72	98	88	530	586	539.001	521	468	451.999	477	571	302	289	351	283.001	312	441.999	490.999	869.001	78	137	353.001	420.001	609.999	476	1356	324	705	662.999	89	134	128	461.999	426	505	807	740	322.001	588.999	461.001	623	800.001	588.001	918.999	1360	424.001
APBA2	42	160	149	2	9	0	2	1	7	45.001	30	21	13	6	7	8	20	5	4	17	20.999	12	3	6	6	11	24	35	31	11	3	2	1	4	5	2	2	34	9	29	9	8	15	25	9	23	34.999	8	21
MAP2K3	2173	1902	5478	2160.99	1674	2066	1598	2087	3537	8148	1687	6496	6005	1646	4822	2881	4695	7080.99	7559	6182	5512	5734	3213	3661	4044	4168	4713	3997	2231	2156	3554	1911	2289	1245	2510	1548	2505	2864	15298	3641	1873	1384	4108	2336	17073	11621	6680	2454	2580
CLXN	6	9	7	10	26.999	22.999	58.001	5	1	17	20.999	35	4	14	6	15	5	26	8.999	8.999	11	4	29	17	8	19.999	76	3	10	6	10.999	16.999	1	11	2	36.001	31.001	22	16	81.001	25	55.001	31	60	13	17	1	24	11
TMSB10	153181	133215	256184	2270	3537	2450	198247	85705	122491	53754	109141	50988	27818	149309	49975	135242	79097	25978	36713	40861	86994	65768	4043	13190	85627	56142	131716	96330	241407	155842	127501	137773	7479	45902	58741	169510	175399	193174	26317	158452	75429	90602	144756	117515	53461	35692	83995	191516	138659
ASTE1	359.126	549.075	376.064	94.835	88.921	110.609	426.47	142.351	330.914	296.237	312.978	231.392	112.769	235.568	298.346	156.305	292.533	122.386	244.145	143.096	198.026	205.955	239.303	217.301	348.129	408.338	467.236	462.733	598.553	394.864	434.978	345.524	257.074	435.204	527.868	181.16	454.52	318.731	588.924	872.249	255.572	213.025	432.493	396.039	663.193	514.87	524.476	253.249	282.029
RNF19A	1231.38	2356	1273	729.999	640	639	1656	2561	1281.25	1291	3285.37	2509.91	802	5511.86	1980.89	2817	2921.87	745	817.999	1197	1684	1919	697.001	1051	2361	3504	5629	1095.94	1984.53	839.336	1306	2349.6	512	636.999	682.001	1774	1624	1458.69	1534	934	2505	2718	1510.92	1405	1160	1093.93	1220	2603.9	1474
PEX3	1017.88	1051	931.692	558.962	325.93	713	1709.95	995	1290.78	1488.9	1781	1859.95	1150.85	1597.02	1821.94	910	1868	1309	1551.89	1434	1419.46	1544.59	835.971	1446.92	2327.7	2699	3617.95	2644	3134.85	2693	3097.17	2504	890	1470	2673.88	1265.95	3086	2495.92	3893	2626	1480.83	1623.8	3631	2371.86	3834.73	2735.4	2738	2218	2082.78
GABARAPL2	2729	5959	4597	1385	1414	1195	2906	3034	3041	2846	2777	5046	3625	3497	4239	3678	3463	3155	3712	3260	3339	3905	1899	2527	2790	2953	5777	2984	3419	2362	2413	3650	1610	1955	3105	2117	2233	2718	5461.1	3789	2305	2335	3169	2932	5566	5115	3946	4938	2942
MYOC	9	15	12	2	4	0	0	0	0	0	0	4	1	3	5	2	2	1	1	3	3	1	2	3	2	1	2	1	0	2	0	2	1	0	1	1	2	2	4	2	8	0	7	3	5	0	1	0	4
SH3YL1	1224	878.146	959.002	137.001	106	111	10291.8	2391	2876.4	291.998	1582	4189.9	1838.01	3582.73	852.991	3671	619.966	684.237	833.923	737.001	451.608	385.001	309.001	407.002	1034	5500.49	7735.87	1339.91	2357.25	2768.39	3919.93	4392.3	228.988	1102	552.345	2640.95	2518.53	1342.97	785.943	746.987	339.002	728	1162.7	704.886	798.029	594.347	484.914	963.999	867.963
FAM136A	2462.79	2629.76	3233.7	1064.01	753.685	1478.49	4408.08	2067	4234.17	2394.95	3533.01	4023.89	1790.56	3910.82	4008.77	1970.97	3266.6	2018.19	2555.18	2701.92	3546.43	2848.43	2008	2934.26	3940.69	5057.72	10656.5	6672.1	7798.72	6535.05	7109.81	6081.52	1848.31	4940.84	3650.96	4435.67	8233.5	9021.38	3794.8	7521.46	2562.77	3330.32	6975.84	6902.43	3528.91	3756.91	7511.5	4699.89	5159.59
VCL	11440.6	14076.6	18789.4	403.276	386.053	394.109	2057.3	1709.87	3090	1434.03	2730.88	3723.18	1130.89	4248.72	2222.53	3573.22	3627.06	1675.84	1830.98	2400.09	3284.41	2492.89	215	624.33	1958.09	3309.22	5629.62	2507.63	3238.18	1736.16	2741.94	2896.7	468.535	488.076	543.1	1004.31	1699.02	2305.66	2363.54	2274.62	1266.43	1706.88	1954.18	2591.56	2825.08	2367.53	4076.91	3683.02	1659.92
DEPDC1B	55	62	44	2	2	2	2324.22	1984.44	3858.94	197.703	1492.92	1732.99	182	2682.13	1347.96	478	1242.91	422	239	703.773	1197.91	1041.96	1	80	249	2593.81	10233.7	3671.95	4001.83	3788.84	4079.98	7060.83	8	272	17	810	2065	1286	60	1653	188	688	2775.98	3614.95	22	48	2676.95	2730.94	1520
DAPK2	21	9	78.999	11.999	35.001	13	15	28	9	67	59.001	175	68	135	147	114	25	27.001	67.989	22	48	40.176	30	149.999	204.001	187	278	24	110	55	56	409	83.001	113	149	362	198	223	94	27	117	115	52.001	122.999	234	168.999	69.001	293.001	96
NSMAF	1110	1164	1348	60	41	41	269	140	336	370	195	185	366.001	344.999	288	339.999	249.001	253	528	267.999	346	256.001	147	176	414	322	637.999	494	442	267.002	355	272	268.999	167.001	296	126	271	351.001	898.999	871.001	214.001	220.999	285.001	393.001	666.001	556	1145	311	172
ADSS2	3521	4606	3159	345	342	451	2131	1576	2145	1128	2101.99	2551	991	2886	2264	1652	2365	1295	1193	1500	2207	1871	627	788	1413	3251	6196	4399	5109.99	3735	4057	3699	625	1041	1841	2262	3486	2796	2375	4082	1143	1783	3083	2721	1900.03	1924	3109	2634	2115
STAP1	0	0	0	0	3	0	0	0	0	0	0	0	0	0	2	0	1	0	2	0	2	1	0	3	0	0	0	0	1	1	0	1	0	1	0	0	0	0	8	0	2	1	0	0	2	2	0	0	2
TIMP2	42572.9	10942	30863	46	215	27	3189	2997	1405.66	326	171.711	368	1210	1283	226	1207	111	302	281	362	168.999	410	135	548	217.999	384	3611.87	551	2188	399	892	3405	38	437	63	604	535	1822	142	528	72	104	224.999	990.001	115	243	199	1394	396
RFC1	2495	2183	2256	670	764	648	1708	1120	1681	1994	2559	2812	1220	2992	1867	1888	2866	1249	1380	1949	2743	2250	1360	1979	2313	2182	3517	3127	3585	2270	2416	2813	1090	1724	1705	1568	2035	1930	2615	2421	3160	3029	2331	2732	2402	2201	3141	4807	2343
TBC1D23	2854	5959	3348	655	473	521.999	1705	1261	1574	1158	1998	2175	869.999	2183	1962	1074	1980	914	1069	1228	1262	1548	842	1168	1794	3358	3202	1494	2345	1300	1456	2268	750.999	1321	1400	1338	1475	1376	2955	1621	1944	1935	1791	1809	2651	1983	1961	2710	1394
CUL3	2161.68	633.238	2744.87	764.174	584.494	577.261	2636.78	618.001	787.887	856.684	429.987	294.198	564.062	568.354	248.011	489.967	373.556	437.989	674.942	421.821	481.862	651.222	894.396	1237.3	796.396	490	926.284	886.727	2171.47	927.323	2261.19	1471.29	309.839	1273.11	960.285	2143.1	1860.06	2095.87	1297.39	1296.81	332.525	362.04	1014	837.645	1420.34	1187.41	875.802	1061	834.491
MYOM2	111	77	131	182	82.998	245	151	25	96	120	107	162	108.001	30	43	21.999	143	122	114.999	106	117.999	148	337.999	420	248	34	80	90	105.001	85	92	56.999	120	217	371.999	207.999	232.001	220	203	62	39	33	124	89.001	367	234.999	179	165	226
OTC	0	0	0	3971	2086	3082	254	257	278	9719	3340	4446	4139	663	6110	293	8379	7964	7920	6852	4108	9296	3717	5255	10973	13259	228	3117	126	1749	4553	41	5098	1760	6883	883	2177	686	23053	681	1753	1388	9013	363	18685	11415	4208	275	2715
CYP46A1	24	19	28	17	32	12	13	11	13	46	21	34	90	17	20	40.001	20	40	54	43.999	29	27	68	42	19	21	30	12	46	24	26	21.001	68	37	67	16	32	36	83.999	30	54	66	33	30	96	137.999	21.001	27	21
ZZZ3	1213	1797	1023	320.999	288	387	991	767	968	898.001	1768	2422	598.001	2094	1671	1067	1905	679	783	952	1415	1315	614	798	1359	2443	2847	1329	2474	1135	1518	1738	530.001	1213	885.001	1310	1461	1300	1526	1892	1733	1717	1424	1802	1241	1121	2152	2611	1218
SLC18A1	0	1	0	1	0	0	0	1	1	2	3	1	1	3	0	5	1	1	5	0	0	0	0	1	1	0	3	0	0	0	0	0	0	1	2	0	1	0	4	0	5	2	1	0	0	1	0	1	2
USP2	19	33	36.178	238	393.026	248	21	86	98	148.999	241.836	766.843	304.655	393.571	815.585	239.425	207.198	185.553	238.998	189.998	216.623	218.921	149.589	191	131.001	199.001	1173.08	412.342	221.999	195.934	139	392.984	77.12	62.989	104.309	73.317	124	144	350	290	58.045	96.107	252.314	544.944	515	252.711	416	220.385	258.999
CASR	5	4	7	2	10	4	12	19	8	6	2	25	18	10	10	23	14	14	16	17	17	5	4	12	4	161	4	5	5	9	4	4	6	1	1	1	0	0	7	0	33	14	9	3	12	22	0	3	6
TUBG2	680.098	1249.7	922.752	65.205	69.222	76.818	174.36	530.224	336.576	900.124	1342.16	1066.95	596.8	1228.73	1063.01	596.968	934.169	635.937	857.934	884.349	1022.2	724.106	371.506	254.419	1111.26	1792.85	2470.16	1040.42	2212.85	1315.62	954.312	2030.36	1458.22	1923.23	1519.09	1558.24	1471.22	1148.97	1960.17	1202.88	2559.71	2888.08	2107.49	2309.86	2036.36	2440.96	705.706	3265.01	1700.06
RPL26L1	3946.68	2394.36	5081.48	1064.66	907.699	895.838	4395.8	1003.7	2101.59	1338.81	1598.47	1940.35	1155.15	1970.45	1635.48	1127.74	1651.35	1182.67	1350.73	1380.8	1762.67	1604.42	1357.93	2238.25	1252.78	1459.69	3357.66	3016.53	5060.91	3119.21	3946.24	2696.44	676.931	2304.54	2399.66	2664.28	4045.31	4631.29	2052.39	2797.72	918.654	1063.71	2983.69	2778.74	2571.5	1850.74	3367.28	2606.78	1833.84
FLT4	9	2	7	5	31	7	0	1	4	0	5	6.001	11	13	0	30	7	8.999	19	10	12	5	3	41	5	11	15.001	3	14.001	13	6	14	6	1	2	4	6	8	17	0	9	10	5	5	30.034	61	6	5	8
NSUN2	2693	3028	2579.99	984.999	1054.98	1048	1394	714	2548	2212	1111	1380	1487	877	1392	678.001	666.001	2177	2409	2931	2873.97	2848	1561.99	2425.84	3570	5659.95	5333	4549	4210	2680	2896	2953	1585	832	3037	777	1902	1462	6775	8871	2309	2434.89	3877	6709	5277.99	4119	8203	3433	2087
FBXO42	1385	1600	1230	342	297.999	292	361.999	482	699	668	1268	1159	542	1461	952.001	938	1105	511	664	578.001	984.001	777	422	534	1074	1131	1730	1402	1684	1570	939.999	1812	498	1192	1205	854	1276	1240	2063	1674	726	814.001	1561	1536	1605	1139	1180	1626	1294
MFAP3	1118	1376	791.999	196	159	186	614	686	1048	718	1329	2259	756	1348.02	1142	946	1667	762	950.002	1029	1158	1202	334	467	964	1606	1744	1034	1448	763	1298	1075	539	627.001	805	503	880.999	921.999	2322	1524	746	634.001	1018	1104	2031	1366	1296	1168	751
MRI1	362.882	580.286	615.094	268.737	201.567	291.977	216.212	299.763	710.965	1196.98	955.899	1433.63	682.579	741.82	1338.52	683.888	1217.52	559.411	749.422	950.433	1531.94	1301.25	196	596.001	1103.67	1219.55	1980.81	1446.78	1249.44	1060.47	751.583	1165.46	358.853	353.998	421.085	296.37	429.108	409.52	1409.85	1743.12	1118.78	1680.71	1765.88	1876.65	1176.06	1665.47	1870.39	1896.85	1593.34
METTL1	980.001	897	1200	526	353	472.001	719.999	419	1224	710	1358	1130	447.995	1406	1305	524.984	1447	679	817.94	964.977	1292.98	1234	381	763.999	954.999	1733	2903.99	2469	2574	2206	2728	1333	502.999	1695	1504	1912	3010	2983	1578.99	3697	815.986	936.992	2747.99	1986	1139	1038.99	2337.97	1544	1952
HOXC8	3	0	1	1	0	0	0	0	0	0	1	1	3	0	2	1	1	2	1	1	0	0	0	2	2	1	1	0	0	0	0	3	4	1	0	0	0	0	1	0	3	3	0	0	1	3	1	1	3
AGA	1690	2224	2379	461.999	352.001	460	1590	742	1121	1641	1205	1713	721	1545	1933	1253	1811	1292	1683	1216	1186	1574	622	1223	1521	2294	3562	1720	2666	2106	3074	1680	779	1841	2499	1413	2870	3062	2546	1389	807.999	732.999	2560	2655	1709	1126	1040	1285	1480
PI4K2B	465	112	317	886	733	723	567	214	341	498.005	115	103	202	163	107	177	130	205	442	189	135	225	1447	1980	522	119	252.011	289	356	129	476	261	283	127	219	126	158	250	620	201	151	127	154	145	643	498	638	277	154
BOD1L1	3085	775	2226	395	621	305	1353	649	751	524	578.999	512.001	420	827	390	553.001	491	233	419	367	514.999	830	850.001	1178	671	501	1010	929	1638	700	1002	1065	375.999	736	603.001	681	756.001	772	889.001	1398	582	686	745	772	1055	1035	602.001	1176	782
MAT2B	7368	9413	5907	2272	1534	1899	8353	3227	3843	2019	2865	3463	1565	3332	3377	2655	2899	1492	1975	1888	2172	2422	2559	3899	3691	4028	5429	4438	6152	4618	5781	4769	1324	4264	4108	3147	6522	5168	4681	6982	2036	2031	5329	5063	3756	2734	5256	3978	4078
TLL1	2	1	0	0	4	0	0	0	0	5	8	3	6	16	5	16	3	15	3	7	4	4	1	6	0	2	9	4	10	1	2	81	2	1	0	2	1	0	4	0	7	9	5	5	4	11	0	5	2
EDC4	579.677	659.923	1216.85	335.321	320.571	415.54	199.356	382.798	1050.02	1302.08	1108.8	1514.75	911.867	1038.39	1642.28	1013.62	1118.19	918.89	1209.11	1647.22	2076.18	1730.39	547.062	786.661	1147.79	1494.77	1688.65	1478.48	1018.49	896.98	800.617	1019.23	687.256	621.37	899.771	579.608	679.541	941.224	1962.69	1351.97	1064.12	888.154	1102.71	1330.01	1664.22	1586.71	2603.83	2052.96	1084.32
TRIO	1305	565.463	1931	132	166	117	337	233.999	208	599.001	468.001	272.001	349.924	637.932	175	392.001	286.999	208	280.752	330	492.001	451.999	291	367	523.876	361.963	808	523.001	1491	477.96	712	1193.99	256	442.999	395.001	829.922	728.992	1078	703.999	828.98	302.907	408.001	584.999	510	1110.89	1167	370.999	1336.99	499.941
VCAN	23264.3	4650.26	9497.34	12.058	29.137	18	28216.1	11657	6508.76	5404.08	20977.8	8655.16	2527.53	10666.7	4938.7	10849.5	19530.2	622.128	1314.95	2447.99	11367.1	21646.2	7	135.954	9522.05	11571.7	2653	3186.95	7209.3	5974	12377.8	3257.5	165.999	13331.8	2259.55	21131.4	14868.6	8122.77	559.437	17403.8	22968.4	21179.3	21680.3	9896.64	215	657	1235	16336.9	15218.5
CLEC16A	503.001	606	749	119	174	223.999	220.001	416	820.999	1182	609	1175	612.001	675.001	810	631	1069	606	751	982	900	972.999	448.001	712	1026	902	1443	929	868.999	501	541.001	1246	500.009	324	847	203	363.999	660	1437	857	398.999	461	832.001	1186	1900	1699	1016	1046	676
MSR1	2	5	10	22	53	17	0	0	0	0	1	3	40.999	1	0	9.001	0	5	2	1	4	4	11	137	1	0	7	0	0	0	0	0	7	1	1	0	1	0	3	0	7	3	0	2	4	8	0	1	2
CDH1	16	19	131	1710	2194	2505	6824	10414	11772	6716	11823.9	20963.8	6963	17680.1	12628	16543	10236	5079	5154	7232	5228	8372	3609	5663	10996	31392	27398	5489	8853	5652.9	8709	7468	1520	4754	2530	4769	6656.01	7541	5203	2136	5567	4462	8253	8563	4254	2855	4977	9979	5755
MTREX	1775.97	1675.54	1806.29	357.965	364.675	381.484	1215.66	765.564	1300.46	933.505	1525.09	2173.12	708.916	1537	1658.5	1135.48	1777.54	674.787	820.966	1017.65	1271.34	1375.75	665.796	995.992	1235.56	2257	2794.46	1721.51	1804.36	1060.32	1504.64	1325.86	517.963	589.939	785.954	695.686	958.633	1047.23	1751.47	1537.29	1355.81	1296.28	1417.09	1863.56	1191.95	1188.16	2155.07	2439.96	1058.28
DNAH5	39	60.847	72	86.001	192.998	52.999	108.999	135	52	177.999	153	423	73.55	271.999	150.856	167	131.741	22.86	28.001	67	96.172	128	213.999	268.001	275.001	356	314	111.001	391	246	172	279	24	50.999	66.999	546.001	278	213.001	37	125.999	79	217	218.001	149.998	60	117	68	189.982	195.991
ZFYVE16	1598	678.703	1043.63	209.512	236.987	234.527	366.885	329.147	445.142	570.308	508.875	929.177	365.713	696.246	561.614	603.394	779.708	370.108	421.868	481.803	621.847	635.293	445.438	513.692	634.416	712.07	1141.06	647.662	949.066	545.079	789.853	685.33	270.558	597.372	392.536	442.826	593.173	641.691	756.442	638.068	476.731	611.585	631.128	698.207	721.967	741.879	626.503	798.797	508.738
RIPOR1	1717.05	2864.95	3282.99	177.001	201	316.29	260	508	689	756.997	962.988	804	374.999	1316	569.982	519.801	828.999	374	412	582.995	831.594	505.001	361	679.026	1098	828.997	2672.94	1893.98	2221.94	1485.99	715.999	2760	559	818.002	1172	857.999	1081	1593	1531	1175.94	529.975	668.001	1609.7	3031	1774.99	1244.92	1244	2169.01	1739.12
C6	152.999	18	6	14815	11556	13268	7	69	51	8113	4962	5483	1663	1593	9865	385	5202	2467	3338	2718	653.001	5364	23490	22212	10484	3749	337.999	2125	249	2041	2897	59	2028	1778	1505	798.999	1280	748	6505	425.001	3685	2258	6266	496.999	2550	2901	273	541.999	1962
RAI14	6801	11066	7681	272.001	355	277	231	272	312	819.999	1062	792	669	1239	447.999	410.001	1005	544.001	646.001	588	787	731	987.001	917	914	800	2173	829.999	1979	809	1002	1977	402	382.999	535	779	882	1322	1462	1172	871	944.001	845	1766	1477	1453	1287	1912	736
SOX30	5	7	4	2	8	1	1	1	2	16	21	12	4	11	15	10	7	5	7	3	4	4	3	0	7	7	18	8	21	5	2	13	3	16	9	30	18	6	8	27	8	21	21	18	7	1	7	35	12
PNKP	639.515	556.936	1119.55	312.595	391.711	272.416	375.167	302.977	670.23	1499.87	551.843	702.8	903.059	654.793	588.626	612.061	529.466	518.919	1832.16	972.178	862.285	810.609	511.757	1139.46	2220.62	824.191	1137.03	1084.28	1010.37	920.324	850.367	906.821	1491	657.591	847.517	583.175	761.632	872.795	2228.18	805.595	1227.42	1033.86	959.862	1093.97	3200.34	1755.84	2373.08	1032.23	883.182
BEST2	1	2	1	0	6	3	0	0	3	0	3	0	3	5	2	7	1	2	3	3	1	0	1	0	3	0	4	1	4	6	0	9	3	1	1	0	0	0	1	1	4	3	2	2	2	5	6	0	1
PHLPP2	225	104	251.927	51.678	50	122.682	215.021	138	164	281	196.133	148.373	253.144	239.308	112.933	168.653	239.618	248.316	342	288.848	292.001	254	106.121	305.106	260	285.001	335.227	244.871	314.75	133.121	339.683	317.105	243.183	133.077	349.141	95	174.786	230.508	855.705	463.337	167.521	143.884	245.5	193	1006	832.634	474.716	218.053	141.024
SPDL1	1336	982	666.999	27	22	19	1276	539	1331	169.999	649.001	779	143	1043	681	391.999	748	432.001	332	509	779	595	38	161	414	1515	2943	2279	3150	2524	2904	2578	159.001	442	413	402	2152	1714	428	2487	402.999	987	1871	3268	324	454.001	2153	1574	995.002
STAU2	1423.1	2645.61	1154.46	401.93	307.001	363.999	978.865	1065.94	1041.21	805.001	1383.16	1555.81	678.336	1837.92	1242.99	1045.9	1396.46	706.769	994.515	876.901	1049.51	1088.9	699.002	794	1156.99	2042.4	2492.85	1585.76	2321.11	1167.57	1021.07	1691.23	682.307	742.764	971.807	532.581	967.374	817.262	2288.99	1481.73	800.933	1089.72	1525.01	1877.94	1555.6	1798.21	1761.78	1759.51	990.823
SLC66A1	324	810	611.999	357	317	438.999	178	402.999	711.999	1601	1326	1000	1330	1194	1125	853	1325	1739	2304	1609	1625	982	473	732.999	1368	1452	1763	1556	945	1170	852.001	1237	1122	972	2763	556	734	861	5706	1907	1186	881	1342	1149	9053	6936	1807	1395	1460
CTNS	386.019	1726.44	888.327	217.21	269.19	250.671	109.902	268.368	567.111	779.494	761.89	2359.41	930.482	883.354	2172.43	512.11	1317.9	1495.28	1328.73	1247.05	1288.24	1063.86	491.448	719.881	1108.95	1427.89	1843.55	1730.78	747.636	1019.16	880.627	676.721	615.113	922.665	1690.71	441.099	859.384	810.477	3007.47	1668.34	353.158	407.404	1451.3	1163.89	4579.28	3620.35	1942.78	754.201	1164.39
RTN4R	11	34	30	51	65	30	61	72	176	177	72	84	36	83	100	94	61	132	78	116	94	143	227	273	193	119	97	100	63	91	71	120	44	67	120	38	61	79	233	111	34	32	93	38	403	250	203	76	91
PHF23	1063	637.979	1790	392	556	374.999	491	342	411	866.001	399	419	539	386.999	374	329.999	434	368	711	332.999	380.001	421.999	635	943.999	1252	380.001	740	611.001	819.001	495	1056	485.001	469	598	815.001	388	606.999	831	1108	963.003	357	233.998	563.999	677.999	1168	1064	794	541.001	500.999
CDH10	6	3	6	2	2	0	0	1	0	0	1	0	5	2	5	2	2	0	0	0	1	0	0	2	0	0	0	0	0	0	0	1	0	0	0	0	0	2	0	0	4	5	1	0	2	2	1	0	0
INPP4A	655	301	530.049	46	50	44	252	193	253	290	193	231.999	242	262	135	156.001	188	185	253.999	208	179	246	178	258	270.001	215	425	279	487	171	444	481	229	117	230	146	205	279	594.999	429	187.001	190	252	286	489	500.999	343	255	170
RAB27B	11	7	90	16.014	72.269	87	1600	789	930	67	94.45	92	84	947	64.117	422	64	461	171	382	429	79	33	78	139	327	2648	490	774	193	160	1790	7	45	101	145	177	582	85	550	71	77	40	300	150	145	351	731	152
PSMA4	10385	7888	10644	3465	2315	2408	20686	4490	7562	5752	5548	6397	3740	7126	5423	3840	5052	3992	5009	4621	5666	5026	4057	6616	5008	6430	12745	11500	16376	11983	14759	8842	2542	10783	8681	13027	17517	19365	9519	13813	4006	5188	11823	9945	8489	6281	12973	6363	6711
MYO16	12	8	2	104.999	126	95	12	7	7	52.005	15	28	31	24	8	11	12	20	29	26.001	14.999	14	161	120	38	22	134	45	67	37	27	156	20	25	35	16	42	32	52	13	18	16	24	37	24	46	24	25	32
LSG1	1826.59	2271.97	2425.89	693	693.999	720	1423.76	1035	2323	1687	2045	3844	1397.9	1704	3018.99	1101.91	2413	1432	1735.99	1887.99	2167.96	2488	861	1421	2058.98	3868	5001.99	3350	2868.85	2405	3167.92	2056	1046	1231	2377	1048	2046	1765	3954	4893.96	1144	1216	3095	3296.8	3782.98	3553	3972	1877	2163
PARP3	1141	2253	2802	341.999	335	387.001	266	422	329	1219	893	882	316.001	760.999	1119	489	900	564.999	643.999	588.001	632.999	664	1117	913.999	1800	920.999	1117	597.001	688	791	705.001	453.999	698	822	870.001	555	823.999	845	1159	579.001	661	698	1107	966.001	1187	1166	454	1101	1194
TNC	1592	1788	1589	5	32	2	22	58	14	1023	7691.83	1837.9	108	387	380.001	206	4319.95	25	51	293	649.999	866	2	55	1002	62	32	75.818	126.829	168	185.591	35	39	216	23	1452	1598	975.001	38	213.999	670	630.32	2168.83	705.96	21	123.689	22.5	774.937	594.894
THAP3	1074.57	1577.92	1949.83	400.156	429.599	376.726	704.804	632.9	1146.96	795.595	1125.02	1457.52	540.215	1485.12	1326.22	701.601	1083.31	533.283	670.565	729.621	1083.94	1038.96	748.096	1127.17	876.317	1404.59	2498.17	2050.47	2318.29	1830.06	1606.34	2058.71	459.241	1635.09	1069.32	1711.31	1707.43	1864.05	1538.14	2664.95	848.926	993.727	1874.39	1819.34	1725.37	1181.48	2231.28	2048.71	1336.66
RIPOR3	627.001	1290	474.999	6	68	13	0	2	9	52	13	8	7	16	15	16	12	26	52.999	31	24	13.001	35	34	31	13	52	26	32	16	4	25	26	13	8	3	11	31	41	12	14	30	17	22	45	92	13	17	20
TDP1	232	563.001	345	101	135.001	103	537	350.998	590.999	386.002	847	774.001	259	900	549	440.001	720	391	519.999	448	678.001	574	160.001	232.001	676	909.001	1408	1144	1461	1154	1120	1218	254	618	381.999	766.001	1085	1122	732	1149	514.999	598.999	929	1006	712.999	528	1707	1132	990.999
AIFM2	1018.91	1565.95	1969	507.771	300.237	373.751	738	712.999	1658	2862.9	3161.53	4027.91	1586	3120.5	3469.97	1170.25	2501.11	1751.63	2376.23	1683.22	3371.59	1874.07	942.434	2664.19	2966.57	2898.1	6448.7	6178.97	5985.54	6275.23	3979	2087.25	1017.64	3278.97	3651.49	2173.94	4400.56	6288.6	5533.51	4429.9	2028.65	1963.15	4538.22	5945.38	4989.46	3204.07	4854	3307.61	3398.31
C2orf83_ENSG00000042304	1	1	1	0	0	0	0	0	0	0	0	0	3	0	0	1	0	0	1	0	2	0	0	0	1	0	0	1.003	0	1.002	1	4.015	0	1	0	1.003	0	0	0	0	0	1.003	0	0	1.003	0	0	2	0
SPATA7	378.006	388	344	55	67	62.999	508.999	253	253.999	402.028	1091	1773	358.001	1025	1095	466.001	1187	378	313.001	369	715.998	741.001	151	279.001	556	956.001	1466	1252	1937	1565	1703	1449	143	1436	424.999	2023	2578	1756	658	1589	865.209	1135	1648.12	1751	472.001	509.002	781	1870	1680.32
MED17	987.532	1069.07	876.752	91.555	142.676	73.907	387.527	380.15	556.529	509.195	550.847	684.954	530.476	758.17	1118.88	853.661	304.807	351.166	520.888	567.282	737.477	805.653	226.556	225.061	614.624	1464.57	1686.39	1350.08	1761.67	1045.35	962.541	1389.01	384.994	452.682	573.108	365.476	1073.15	636.196	1731.29	2531.36	954.052	1269.39	690.099	1501.82	1279.56	832.445	2196.09	1608.61	773.28
RETSAT	1303	2155.74	1711.97	1753	1915	2279.99	1636	2083	3476.49	6995.54	2666.83	4162.7	1918.95	3859.76	8920.29	3555.56	5089.47	4052.69	5222.29	3991.41	3881.45	5418.81	2449	4577	6076.57	4949.92	4521.81	3039.79	1856.92	2599.94	3146.97	2106.84	2316.24	2303.97	6179.73	1250.99	1963	2138.43	10036.8	3738.55	2228.71	1681.8	4287.78	2782.86	7984.9	6038.16	3651.52	4723.68	2864.99
CAPG	675.998	1420	2638	73	63	103	6420	4737	7238	2438	1526	188.001	275	4900	726	3768	1156	1257	1940	1632	1887	678	46	827	3745	1916	2562	1360	2789	2197	869.999	2433	234.999	1572	770.001	2345	1858	1775	1326	2668	881.999	1029	1183	711.999	2054	1223	1201	2277	1976
AP2S1	11930	19918	30403	4826	4551	3690	4632	4910	10026	4887	6442	6575	5001	8610	6369	5890	6792	6145	7023	6500	7257	6624	6203	9394	5716	7543	15338	12476	11571	11151	9932	8544	2613	5649	8525	6941	9939	12725	12152	10229	3307	3321	10643	8598	18167	11356	15144	8780	7800
USH2A	3	3	4	552	421	374	6	9	7	66	34	18	66	13	14	35	55	52	121	158	44	24	754	199	152	30	6	13	13	6	14	1	61	62	39	4	15	10	200	10	89	33	19	11	357	127	28	33	18
ZPBP	0	0	0	0	0	1	0	0	0	1	0	3	1	0	1	1	0	1	4	1	2	1	0	0	2	2	0	0	1	0	2	0	0	0	2	0	1	0	1	0	0	2	0	1	3	2	0	0	3
TG	47	27	17	10	21	13	0	2	5.999	73.999	6	7	18	11	17	12	23	10	6	14.001	26	23	14	4	3	3	7	5	7	12	0	3	22	7	20	3	10	15	72	36	9	10	13	6	73.001	38.001	8	8	7
ADAM28	0	0	1	1	5	2	3491	293	228.001	19	7	21	58.001	62.999	28.999	63.999	11	7	20	23.999	12	10.001	0	7	36	45	46	7	3	1	15	3	3	0	0	1	2	3	4	0	14	16	8	3	1	2	0	2	7
BARX2	1	0	1	1	5	0	80	23	46	8	0	1	6	11	47	100	3	2	26	14	8	3	1	6	5	12	20	1	1	5	4	6	3	0	0	2	3	3	4	0	9	5	6	4	14	4	0	9	0
DCUN1D1	1477	1902	1128	820	698	654	1231	1058	1269	930.95	1170	1954	1095	1398	1388	1119	1634	1202	1179.99	1161.99	1382	1299	1335	1355	1208	1827	1939.99	1153	1330	754	1100	973.965	715	723.001	1013	546	716	848	2333.93	1577	729	721	988	1204	2024	1552	2038	1173	734.999
JADE2	502	403.001	563.999	75.001	115	145.001	145	161.999	187	113	113.999	92	123.001	230.999	87.999	282	97.999	97	130	121.001	124	95.165	198	193.999	370	79.999	305.001	197.001	171	153.001	100	215	86	157.001	146.998	88.999	103.999	117	105.001	278.999	107	105.999	164	146	98.025	118	254.001	186	131
ZIC2	4	4	10	4	8	3	1	0	2	0	3	2	3	5	3	8	10	0	3.003	1	8	1	0	3	1	7	14	5	4	8	4	9	1	3	0	7	2	2	7	3	3	4	10	12	14	8	6	3	12
LCP2	1	2	9	11	37	11	0	1	0	1	0	1	10	5	2	8	1	0	7	2	4	3	20	114	0	0	1	0	0	3	0	1	0	0	0	2	0	2	6	0	3	9	0	0	2	8	0	1	0
TRIT1	662	613	552	136	137	87	830	303.999	392	377.999	543.002	589.001	266	653.999	579.001	404.999	588	200.999	247	368	544	486.001	202.999	359	464.001	704.001	1477	841.001	1439	876.001	960	1076	154.001	529.999	432	675.001	1132	1272	483.001	1061	528	567.999	967.002	1138	435.001	473	849	1400	850.001
ADRB1	5	2	2	66	73	101	31	2	3	24	5	5	12	10	5	8	3	9	10	2	11	8	3	74	10	9	18	4	18	14	7	20	5	4	13	14	6	11	14	1	9	23	10	13	22	16	1	12	18
GUCA2B	0	0	19	135	332	247	90	216	142	140	400	82	59	54	62	15	22	43	15	22	19	12	70	212	266	81	1101	10	161	17	16	113	2	194	91	329	137	29	47	179	68	321	120	29	65	42	21	150	126
CUL7	792.144	836.001	1457.77	114.999	125	200.23	219.001	540.002	552.992	1241.74	1491.6	1945.57	499.605	1591.64	1586.19	1607.99	2469.9	579.997	783.907	1203.96	1554.99	1249.14	536.967	699.878	1373.9	1413.84	2171.8	995.747	1119.75	1038.91	800.17	1805.87	747.999	736	969.694	1075.94	851.998	992.969	905.758	1028.97	1214	1413	1069.86	1372.94	1039	1005.94	907.624	3712.73	1551.99
CTNNA1	23396	33949	23896	1678	1354	1925	13140	9215	13856	9036	14077	15481	5076	15744.9	12585	12238	12737	5645	7332	7586.99	9721	9093.38	2713	5901	14753	20850	26020	15961	18131	12890	12972	15067	3826	5237	9908	7174	9828	9358	18082	17000	10470	9368	15639	18161	16051	10132	16319	15999	9503
PHKA2	399.12	388.801	645.567	857.743	955.286	1270.29	674.473	881.925	704.951	3176.91	5333.15	2351.99	1066.73	2948.31	2154.75	1266.11	4343.73	1058.19	1701.8	3203.68	3459.54	2522.9	1982.1	4003.01	6400.09	5158.11	2626.6	3484.67	3683.11	3272.88	3737.21	2509.4	2861.73	3451.26	3612.88	2528.24	3364.16	3002.38	3056.91	1999.11	7437.31	6941.23	4953.31	3557.19	3377.27	3431.41	1796.75	5257.74	4818.39
CNTLN	851.999	438	769.999	424	570	590	42	28.001	193	813	395.999	138.001	303	289	206	129	498.001	512	589	510.001	509.001	460	968	1776	657	245	201	499	405	401	276	116	561.999	500	567	183	269.999	262	960	442.999	308	338	515.001	301	1005	1422	492	277	364.001
EPHA3	110	20	166	2	9	1	0	25	0	14	4	2	6	33	7	20	2	1	9	13	5	7	3	6	9	5	13	0	22	4	1	6	5	0	0	9	2	24	7	4	9	14	4	16	4	12	4	42	8
HSPA5	63432.8	70038.6	46037.7	16582	11256.9	13782	33488.9	22085	41201.9	29159.8	49881.8	37497.8	20433	54468.9	39003	20336.9	48504.9	18918	30316.9	34972.8	33258	33453.9	32977	62591.9	49755	71138	143845	79403.9	112585	90590.9	86705.8	108865	19329	71775	55562.9	46831	113520	94319.9	117257	106468	51836.9	46493.9	97403.9	96806.9	74164.9	35040.9	76949.9	84812.9	72221.9
DSG2	311	685	598.962	351.866	483	422.969	5622.96	5690.98	3866	2446.87	5008.98	2565	1739.75	10542	2152.99	7090	2776	1252.86	2163.96	2144.96	2651.98	2146.68	552	1827	4674.99	5377.99	6426.94	2110.98	5654.98	2710	2925	4647.98	792.172	1421	1149	3721.96	2702.36	2979.41	3048	2793	3376.99	4451.26	3333.09	2849.99	2911.98	3004.97	2633.98	8129.98	3339.95
GEMIN8	712.999	1160	771.001	308	244	227.001	1177	806	954	942.948	1645.79	1258.94	698.999	2110	1699	1302	1717	666.013	843.999	803	1169.09	1299.96	470	811	1171	1099	2341	1132	1891.15	1454	1266	1500	379	1339	918.999	2719	2479	2682	1011	1519.95	910	1241	1738.97	2022.97	1096	786.001	1719.31	3130.26	2109
OFD1	944.001	700	877	238	288	199.999	966.001	749	547.997	1163.98	1146	1237.99	820	1430	939	1368.99	831	402.97	590.992	585.986	868.987	862	933.999	787	1906.56	1361.99	2356	877	1669	947.999	910.001	1824	949.001	849.001	1090	1066	1149	1150	1217.42	1133	1243	1644	1267	1385	1332.99	1749.48	794.881	1889	1323.18
GPM6B	63	15	33	3	30	3	40.539	9	19	49.556	16.893	24	44	53	13	117	12	14.407	34	25.646	26	35	12	11	40	11	68	20	23	12	21	29	21	16	14	13	25	34.058	34	8	20.132	26	12	9	39	44.962	9	25	17.82
MAGEC2	5	6	2	0	4	0	0	1	0	1	3	0	1	2	7	4	2	1	2	2	0	8	0	1	2	1	3	1	0	2	0	0	0	0	1	0	2	0	0	0	2	1	0	17	1	1	2	6	4
PREX2	1	2	5	4	26	5	0	0	1	4.006	4	4	19	3	0	26	3	7	2	10	1	4	2	16	5	5	13	1	2	11	13	32	3	1	0	1	7	6	2	0	7	10	2	37	16	10	1	5	2
WDR37	589.002	804.999	825.001	106	122	164	474	520	542.001	606.001	782	833.999	442.001	748.999	655	548	744.999	334	638	537	609.001	598	371	330	962	929.002	1260	659	875	441	704	809	544.001	339	521.999	430.001	532	594.001	1732	712	485.001	595.001	615.999	733	1852	1214	1218	947.002	459
YTHDC2	977	373.999	839.003	251	340	313	535	367	575	1252	383.001	493.999	596	381.001	311	317	374.001	435	622	750	570	946	636	1058	1141	595	531.999	604	896	385.001	893	483	547	316	385.999	307	502	459	1321	555.001	582	773.001	474	532	1673	1579	1201	999	437.001
CTPS2	338.999	312	335	149	155.001	186	638.001	348	411	415	473	333	254	573	373	408	326.999	207.001	538	290	337	316	313	427.999	776.001	559.999	782.001	518	769	395.999	727	568.999	294	228	302	323	545.999	508	598	321	407.001	352	482	561	742	589	768	653	382.001
ATP6V1H	2658	5330	3625	487	436.999	355.999	1277	1489	1787	1751	1716	3700	1796	2534	3066	1969	2211	1796	2015	1678	1926	2159	552.001	997.001	1859	2869	7082	3262	3135	2487	2300	3744	953.999	1775	2925	1366	2369	2432	3989	2872	1201	1215	2982	3567	4239	3739	3346	2714	2348
POLR2B	2733.47	3876.96	3108.85	613.506	473.259	549.051	3293.82	2074.26	2984.71	1774.8	2853.37	6373.83	1890.47	3509.97	4840.49	2787.85	3915.95	1814.97	2157.45	2768.8	3070.3	2827.19	828.742	1490.35	2513.48	5546.73	7117.49	2725.96	3803.69	1551.9	2973.58	2879.84	1159.46	1028.28	1416.15	1375.71	1650.35	2016	3562.07	3181.25	1841.87	2067.76	2285.72	2748.81	3105.26	2812.06	4803.52	3596.13	1695.72
ATOSA	1061	526	925	688	825.103	336.001	439	291.001	240.999	486	299	422.001	418.001	306	249	258	326	491.996	488.999	401	289	387	1153	1270	569.999	416.002	435.999	271	395.001	166.001	366.001	324	436.999	264	398.001	176.001	283.999	280.972	1148	312	315	268	321.999	294	1483	1065.67	282.001	427	260.001
ARAP2	32	8	47	242	175	386	498	333	334	325	130	127	229	275	83	286	146	160.999	296	181	203	222	264.991	360	228	226	438	111	384	87	211	558	182	94	170	144	152	176	595	317	243	134	167	170	562	310.001	256	216	110
TPR	8998.3	4995.73	8291.88	1136.9	1113.96	923.613	3095.77	1766.98	2933.15	2263.79	2741.17	2434.92	1181.06	3375.16	2034.71	2349.19	2380.32	1010.82	1279.44	1512.18	2187.08	2880.45	1568.46	2768.57	2794.31	2887.85	5370.52	4195	6382.41	3742.23	3529.02	4618.58	1307.37	2547.37	2031.51	2289.12	3352.15	3787.43	2450.95	4679.61	2948.87	3491.54	4003.64	4365.91	2670.76	2591.34	3771.67	5147.43	3362.84
CP	14.687	0	211.803	38195.8	36085.4	37521.2	115.776	1187.34	214.589	23672.6	31038.6	7360.22	8386.15	18429.9	9019.93	7436.3	24694.5	18294.9	18415.2	25833.9	16696.7	11609.1	93668.5	125800	40332.2	16069.8	6221.21	3581.37	5628.58	8580.82	9491.01	3754.68	12326.7	10521.8	8335.68	11663	16966.6	12722.5	39683.1	16118.9	33548.9	40727.4	26565.6	7171.02	17762.5	13952.5	2026.76	24017.9	26976.5
KATNIP	307	257.004	458	39	37	52	143	206	285	304.865	310.999	663	260.999	382.793	326.934	386.585	470.718	277.698	300.971	355.937	447.907	427.977	160	138.01	289	307	653	407	444.001	290	270	415	206	169	259	178	248.001	245	372.005	428	212.936	252.999	318	438	400	448	286.001	410.999	363
DTNBP1	526	303	726	67	50.999	75	310	94	231.999	239	116	105	169.999	123	148.999	96	88	125	272.001	151	141.999	185.001	190	391.001	321	90	157	311.999	372.001	292	369	221	106.001	162.001	187.001	155.001	229.001	245	348	444	112	120	221.999	246.001	356.999	268	494	152	191
XK	3	1	3	7	4	12	12	10	42	111	20	38	83	40	83	21	35	92	95	121	62	124	28	88	68	69	37	10	12	17	20	22	22	15	50	7	17	39	157	38	26	9	12	17	97	81	72	9	25
ANO2	1	15	6	0	2	0	1	0	0	1	0	0	3	1	13	7	3	0	2	3	0	0	0	4	2	0	3	0	1	0	0	1	0	0	1	0	0	0	3	0	0	3	0	3	0	2	0	1	0
C12orf4	801.999	1199	867.999	94	95	122	427	213	421	396.999	486	721.999	283.999	606.999	525	328.928	531.001	347.999	344	407.999	422	483	178	294	517	718.001	966.999	552	673	456.999	623.999	474	204	279	395	230.001	498.999	493.001	706.001	661	377	355	600	729.001	713.999	737	852	456.999	387
SCML1	650	534.97	398.966	1107.96	879.951	856	1201	608	650.968	1092.98	887	407.814	711.001	1142.97	741.934	575.971	824	683	979	728	951.939	727	1100.93	1692.93	1180.98	945	1793	1944	2878.99	1394.98	1332.96	2891	968.001	992.964	1943.97	921.992	1109.99	989.971	2717.89	2275.96	1508.97	1418.99	1480	1900.99	2664.97	2439.74	2489.82	2299	1095
WWC3	1463	727	1091	82	123	98	265	173	316	401	232	381	414	245	250	283	221	178	415	242	253	312	137	384	343	199	574	433	666	287	348	777	455	367	716	248	274	475	1011	387	299	167	403	567	762	773	322	552	267
ARHGAP6	387.999	147.999	343	6	14	1	207.001	14	85	7	3	2	10	3	1	14.001	5	3	18.999	10.999	4	5	2	5	2	1	4	3	4	2	6	2	4	3	1	8	11	8	1	2	8	6	4	1	12	9	2	21.999	21
FAM184B	1.307	7.152	13.738	0	0	3.227	0	0	0	2.915	2.237	0	2.564	0	3.192	3.101	2.315	1.307	0	1.04	3.403	1.146	0	0	3.044	2.128	20.362	2.206	5.514	2.346	0	3.424	5.316	0	0	2.114	1.101	1.097	0	4.199	3.859	18.652	0	2.13	6.346	0	6.036	2.387	3.935
MAP4	13100	19755	17456	900	753	560	1392	2808	4315	5887	7585	9624	3038	9204	7110	6237	9186	3654	3770	4557	6687	5872	2085	3042	6053	7382	14688	8422	7679	6662	4024	10491	2382	3161	4941	4143	3862	5838	6458	7807	4146	4837	6926	9374	6735	7187	7560	14967	7618
GOPC	2011.31	708	1611.8	331.73	347	310	851	491	775	928.828	622.981	713.922	963	627.912	573	471.922	428	776.836	890.939	932.893	950.949	1329	817.153	1078	965.779	1478	1131.78	817.933	1977	635	1151	1200.64	581	550	593.893	810	1151	740	2162.9	1307	1043.96	1238.99	565	1224.73	2069.9	1397.94	1604	2082.96	792
ROS1	0	0	1	0	0	0	0	2	0	4	4	0	2	8	1	11	7	0	2	5	3	1	0	0	11	0	14	0	4	2	4	38	12	2	4	1	0	6	13	0	2	9	2	5	4	3	2	13	5
USP28	321	861.999	508.999	175	152	200	239	332	600	449.999	968	902.999	311	1098	795	563.001	761	366	470.001	590	716	628	443	603	603	927.001	789	856	983	541	615	854.001	322	374.999	406.999	342.999	487	452	1150	722	769.998	819	610	777.999	789	625.001	1514	761	496.999
HDAC9	116.999	135.001	100	6	19	1	14	96.001	53	24	38.001	78	182	1099	130.001	560.998	43	141	109	165	82.999	16	5	23	15	252	1572	15	14	10	16	70	1	0	2	3	4	3	54	5	18.999	26	7	11	17	48.001	14	28	31
TSPAN17	434	941.999	1881	199	173	198	261	427	906.001	1239	421.001	558	1286	480	637	406.999	350	1037	1686	1185	717	1046	416	777.001	1438	1033	816	714.999	451	471	710	446.999	720	374	724.999	296	389	546.999	2497	948	348.001	382	524	519	2732	1806	2183	511.001	462
NOP16	3206.87	2321.58	3925.64	2183.21	1194.43	2323.86	8924.65	2236.74	4681.82	3222.19	3651.24	4241.55	2616.65	4295.12	4732.24	1735.17	3916.46	2403.69	2787.17	2907.51	3758.09	3607.08	1494.22	3727.31	3388.03	4857.31	7857.65	7967.18	9980.92	7647.46	11251.3	4593.61	1457.64	3809.33	5291.27	7574.67	11908.2	11443	7088.12	10374.1	1802.15	2170.79	7744.93	5605.92	7450.87	5540.27	9007.93	4091.68	5300.58
CC2D2A	1213	873.001	1382.99	35	67.001	21	222.999	198.002	206	307.742	413	643	201.002	530.999	477	371	650.999	142	168	262	471.999	408.999	89.001	145.999	349	621.999	1038	409	536	275	436.999	484	124.003	241	182.999	298.001	484.999	542.999	117	444.001	281.18	298.999	416.999	518.002	199.048	244.999	433	716.999	417
RRM2B	1277	1401.67	993	312	233	218	1750	2796	1618	2640	5816	9970	2949	8287	5255	3073	7278	2728	2534	3172	4919	5175	485	513	4448	5962	6010	2873	5465	2242	3352	4997	1138	2366	1591	3342	2203	2401	5128	4891	4864	5798	3182	4755	4259	3400	5681	6617	2763
ZNF800	573	240	607.999	346.001	317	283	332	153	437	671.001	222	293	551	176	365	162.999	149	513	595.001	631	560	822.999	329.999	380	638	831.999	336	375.001	435	277	376.001	328	464	207.999	531	200	338	190	2573	1003	523	543	268	404.999	1754	1085	1233	861	472.999
TNFRSF17	0	0	0	0	2	1	0	0	0	2	0	0	0	0	0	1	0	0	0	0	0	0	0	0	0	0	0	0	0	0	0	0	0	0	0	0	0	0	1	0	0	0	0	1	0	0	0	1	0
SNX29	783.897	501	971.937	34	73	71.001	55	85	136.999	396.623	140.238	118.999	156	138.005	99	122	185.66	158.999	174.841	204.922	186	260.001	126.074	298.001	526.421	173.999	177	172.001	177.001	116	144.001	122	155.907	103	180	54	120	133.526	446.874	319	110.233	84.999	194.999	145	654.614	799.897	233.812	181	176
LMO3	20	2	11	1	16	13	1	2	13	125	8	7	23	8	2	10	7	7	11	23	20	45	31	54	89	0	9	21	24	10	15	19	27	5	14	4	9	16	27	11	20	25	9	20	26	148	12	19	18
MRPS10	2532	4202.99	3886.98	896	852	1051	3704	2275	2878.99	2038	2442	2872	1643	3303	2788	1568	2360	1848	2230.97	2188.98	2335.99	2240.94	1384.98	2236.98	2683.95	3800	5281	5221	4091	3854	4764.99	2985	1273	2349	3787	1485	4135	3209	5143	5593	1868	1919	5160	4109	4470.99	4298	5293	2011.99	2687
GUCA1A	9.004	24	21	0	4	1	0	0	1	11	7	3	10	8	2.54	13	2	7	6	1	5	1	2	5	2	3	2.45	4	26	10	2.682	52	2	9.023	0	13	3	15	7	2	13	11	2	11	2	2	3	44	6
RSF1	4046.75	1892.42	3631.57	746	791.001	622	1885.63	992.728	996.561	762.677	775.142	553.188	534.83	1087.01	504.403	1090.14	602.518	318.073	460.799	486.746	600.758	786.966	1224.35	1763.02	817	620.541	1351.52	999.629	2315.17	926.395	1152.6	1526.1	399.345	830.192	828.918	936.271	1037.74	973.001	1029.37	1274.59	719.815	918.479	1270.03	1031.53	1078.65	912.007	634.878	1540.62	961.448
VPS13D	1693	562	1095	406	303.001	467	1240	1070	1103	1064	700.001	1266	563.999	891.999	756	649	856	438	478	585.999	612	1088	889	1339	1233	1022	706	619	791	381	655.999	750.999	378.999	373.999	546.999	450.001	554.999	526.999	1257	611	312.999	556.999	1031	469	1254	1065	763	656	542.999
CELF2	976.001	1068	2271	10	37.001	11	7	105.001	78.999	27	44	100.999	62	518	81.001	74	28	26.001	34	55	33	55.999	14	138	14	43.001	1472	40	222	37	32	419	0	13	3	27.001	47	73	24	63.001	24	46	36	251.001	38	23	8	137.999	92.001
FAM120A	5470	2743.98	5656.28	1926	1691.87	1374.71	3506	1884.89	3428.35	3295.26	2225.15	2180.12	1898.7	2617.91	1652.39	1624	2458.95	1537.92	2122.83	1902.81	2173.81	3350.84	3890.44	5128	3361.62	3468.2	4661.44	4919.38	4137.97	3306.43	5903.95	3543	1402	1926.39	2869.66	2255.97	3434.72	3607	4554.08	3863.35	1516.24	1171.99	4528.76	3738.9	5513.89	3953.49	4231.26	3705.34	3487.42
R3HDM1	870	1023	1196	70	65	76.001	455	363.999	868.999	457.999	676	1006	360.999	948	733.999	531.001	921.999	456.001	482.001	672.001	980	741.999	279	390	496	971	1702	1531	1214	888	1001	738	220	430.001	559.999	397	799	983	810.001	1119	310.999	318.999	860.001	1161	928	832.999	1739	781	759.999
COL9A2	28	5	26	1	3	0	7	17	7	1	17	14	14	19	10	19	17	5	24	9	17	6	5	12	26	6	38	24	88	40	95	216	1	26	7	64	70	73	1	6	36	19	23	35	1	2	25	86	29
KITLG	233	94	115	9	7	9	1693	998	1368	272	600.999	1101	422	1383	1130	1300	1184	512	600	644	1049	1555	6	15	345	673	1112	1500	750.999	817	1316	748	34	600	113	1698	1535	1038	1214	1851	189	478.999	1338	568	768	282	1788	411	960
ERCC8	606	887	807.001	108.999	91.999	62	642.998	369.001	566.999	544.078	522.001	757	338.344	730	681.999	396.998	716	478.001	529.001	595.204	703	642	186.999	294.001	529.001	771	1503	1125	1370	1068	1104	786.999	280	680.999	565.001	600.002	1276	1255	921	1294	360.043	481	1140	1122	819.997	712	1245	711.001	669.001
ADAMTS6	256	85	162	3	6	3	92	66	72	12	16	19	38	35	18	77.999	19	4	40	24	16	22	13	11	40	5	8	32	17	23	17	46	10	12	12	13	13	24	6	7	29	26	26	18	25	8	3	38	24
H6PD	784	505	1228	1839	1979	3147	138.829	301	274.972	4208	1102	708.001	1372	1356	723	845	2437	1807	2566	2553.98	1726	1382.98	4653	9430	4530	949	837	1614	1199	1510.94	1426	830	1672	1688	1706	1096	1864	1158	4058	541	1262	1265	1892	968	2908	2181	461	1269	2165.97
VAMP3	3449	6781	6067	715	486	414	2969	2007	2843	2332	3299	4723	3099	4312	4294	4440	3788	2816	3189	3163	3887	3480	805	952	2691	3980	6658	4013	3973	2720	2776	3683	1227	1573	1899	2434	2752	3170	5585	6253	2690	2882	3243	3923	5452	4807	5946	6785	3779
PER3	585.979	417.509	543.445	442.488	373.989	277.444	262.99	94.579	96.465	198.999	229.48	305.464	193.194	319.824	247.048	153.984	253.183	243.154	343.857	226.289	260.357	305.884	1366.24	1179.21	317	209	146.247	297.536	386.999	170.999	200.007	174.396	540.088	333.835	326.941	168.504	159.918	118	673.972	309.668	284.447	414.054	264	256.001	992.923	622.174	388.938	332	222
UTS2	38.644	46.392	0	5.511	10.011	18.555	265.889	6.421	11.535	0	35.52	13.536	7.673	18.172	15.944	7.016	16.817	13.846	18.117	21.406	22.448	26.083	43.705	42.76	0	0	8.754	17.464	0	0	0	17.605	29.911	20.166	0	18.495	0	0	41.856	26.332	10.552	23.946	0	0	49.077	36.804	0	0	0
TNFRSF9	32	24	39	2	5	0	2	13	5	2	1	3	22	27	3	25	6	9	7	20	11	6	2	10	1	6	20	5	4	4	6	9	3	1	0	6	3	1	16	14	21	22	8	5	33	30	15	5	12
EPN3	0	1	2.181	0	5	1	69	72.603	227.619	11.05	12.367	70.398	57.207	61.701	34.514	118.806	6	53.183	153.434	172.182	12	5	0	4	4	29.828	283.401	9	16.17	31.334	26.515	109.214	7	2	1	2	12.202	18.67	16	4	7	4	5	35.179	18	8	18	35.188	8
LTBP1	17629	3394	4039	124	267.001	241	510	316	176.001	151.001	887.999	100	179.615	525.989	77.999	215	242.959	84.001	156.999	246	344.97	66	450	322.999	274.894	195.999	383.977	199	1275	221.001	223	687.999	176	222	129	773.999	453	923	724	850.001	597.001	666.994	249.999	1032.97	396	386	265	1820.96	362.999
RCN1	19963.9	25791.7	19805.5	1803.16	1673.52	2004.83	3831.22	2322.98	2933.71	7205.13	5496.76	5856.88	3256.38	6253.66	8927.28	4882.58	8363.29	4896.83	6986.42	5449.78	6671.63	8460.42	3218.3	5823.78	9749.86	7077.35	10019.7	7407.37	10268.5	7045.16	6259.14	7450.44	3108.92	5691.85	7018.96	5279.62	8622.51	8866.57	15286.8	13319.6	6483.68	6828.62	14122.9	11469.1	10227.9	8561.12	11600.4	9672.57	10636.7
ELN	1934.85	167.621	587	311	186.001	117.002	0	2	2	7	11	8	13	11.006	4	16.029	3	4	10	10	5	1	41	38	1	7	8	0	4	13	3	3	12	2.002	1	0	4	7	7.028	2	14	3	10	9.007	11	14	3	12	5
RFC2	728.999	1280	1173	490.949	311.999	748.999	2145	611.001	2219.99	722.998	1188	1343	470.001	2415	1431	966.955	1392	1061	1191	1141	1497	1123	528	1185	1356	1980	4230	4093	3959	4340.99	3795	3140	443	1706	1198	2436	3847	4688	1213	2107	842.001	1215	2679	3418	1252	1057	4150	2267	2180
ARID1B	2335	1185	2049.98	357.999	546.092	458.959	1187	619.967	760.999	951.292	824.93	818.999	571.001	987.89	462.002	1024	794.002	370.999	526	543.998	699.228	811.916	1076.81	1227	1173.28	733.129	1355.69	1037.03	1573	816.81	1204	1290.57	475.234	636.001	654	541.573	790.782	976.099	991	897.915	603.573	655.98	1041.33	1269.56	868.888	970.001	601.001	1285.56	831.283
CLPTM1L	2185	1208	3412	2745	2072	730.999	1185	817	1101	1533	972.001	1782	1036	979	1195	571	810	826	1021	953.998	932.001	1506	3446	5973	1881	1085	2395	2257	9870	2285	5180	5086	540.001	1296	1203	2571	3432	5668	2000	2427	526	578	2303	4889	2651	1982	2068	4718	1877
NEDD4L	228.001	348.999	460	439.963	463.847	287.928	1160	747.001	812	805.801	820.275	2895.24	549.571	1443.72	1508.49	986.001	837.419	308.941	438.225	565.377	602.227	789.576	747.55	970.947	1144.08	969.999	3187.95	1352.84	1567.48	1189.15	1472.4	2216	224.84	689.105	322.768	778.814	1098.29	852.418	942.997	753.444	448.474	717.291	1037.84	1600.31	1096.4	806.959	858	1841.82	946.348
FOXP3	1	1	1	66.879	34.722	4	2.005	1	5	1.062	2.971	1.008	4	2.006	1.039	5.002	2.003	2	3	1.007	1.006	0	31.011	30	0	2	6.06	2	1.001	5.01	0	0	4.386	1	7.007	0	0	1	0	2	2	3.037	3	4.04	5.979	1	4	3	1
PPP1R3F	115.997	48	117.973	118.001	65	38	32.999	21.999	24	54.297	52.999	33.999	84.283	51.776	24.626	32.104	36	22	44.271	32.822	29.74	37.993	158.066	92	73.851	18	56.978	60	117	64.931	110.995	141.997	36.268	77	65	97	86.754	92.001	100.956	63	72.381	56.354	56.979	75.974	61.839	72.728	66.999	93	62.72
HEXB	7841.87	14360.8	9142.72	1737.96	1545.34	1613	10511	5925.31	9239.33	8960.2	8061.78	9546.03	8196.49	10213.4	15193	7010.53	6074.7	11555.2	13739.4	11632.8	11301	11006.2	2573.05	6077.03	12192.1	18132.3	18123.1	14891.3	13524.9	13262.8	14726.1	10962.9	6637.3	14576.4	14022.3	10180.1	17873.2	15145.9	30614.6	15420.1	8254.31	8093.32	13961.5	12354.9	27920.2	22845	18821	11124	13670.1
PTCD2	663.905	631.792	485.964	118	132.001	163	790.96	299.999	337.965	358.768	538.76	662.714	349.714	665.704	644.247	372.774	592.305	314.89	324.708	333.517	476.992	522	307	359.484	386	689.486	1030.5	777	906.407	663.946	851.94	556	287.999	550.502	562.932	507.761	968.999	823.15	510	733	407.802	469.09	918.86	811.001	512.243	583.988	491.765	675.702	735.795
NEXMIF	1	2	2	2	8	3	0	3	4	6	4	4	30.197	6	6	33	14	8	14	14	17	12	5	10	1	5	7	4	3	4	1	4	9	5	1	0	6	7	8	0	5	8	0	2	16	11	0	5	5
JKAMP	4792	7129.76	5121	661.626	506.713	623.001	7546.84	2893.9	3061.51	2178	2937.39	4462	2013.71	4260	4093.58	2450.57	2705.4	2098	2476.49	2327	2422.15	2499.18	659.14	1562	3715	4462	8211	4782	8504.41	5297	6440	5507	1189.36	3750.64	3464	5339.65	6478	7262	4748	7474	1900	2344.17	5709	6075	5546	4157	5122	4601	3702.8
DKK3	14001.6	25063.5	31202.5	71.25	97.471	58.112	554.563	770.371	323.142	239.456	1428.4	411.644	2863.47	1394	185.206	636.586	344.967	380.304	1429.09	376.761	2120.52	317.663	140.612	90.481	260.21	458.431	2546.08	4961.14	8425.59	2079.99	1388.25	5267.87	3128.48	1534.26	4127.42	3264.41	2456.64	5458.92	775.141	8560.58	1097.6	3291.58	1039.22	1870.84	684.951	2952.86	6560.5	5964.71	1330.37
ARHGEF5	151.313	355.775	345.852	283.571	192.693	318.85	539.79	561.593	613.673	557.931	1113.51	1223.96	429.263	1291.48	767.819	779.455	560.416	385.487	438.368	433.091	457.773	502.101	305.844	654.461	1289.78	891.231	1305.83	984.757	1066.64	912.656	833.106	1458.98	386.75	626.852	704.009	688.494	637.986	713.283	1255.51	1331.97	565.273	656.305	881.843	927.02	1691.98	1448.39	1049.88	1717.08	1018.77
NFE2L3	246	77.278	215.486	4.304	13.479	8.249	494.893	309.831	208.442	150.981	65.667	64.193	162.564	213.674	115.567	207.555	56.453	57.114	98.518	69.121	58.34	126.395	30.751	46.864	267.95	165.155	332.669	171.831	236.491	82.719	210.725	262.593	49.989	36.07	29.905	72.771	86.536	141.038	108.282	134.432	69.634	84.173	103.895	78.678	110.164	84.569	233.436	149.733	123.344
MCUR1	1087	474	923.949	427	543	453	349	217	569	1190	132	295	837	312	557	272.999	234	874	1535	917	465	671.001	1404	1839	1123	589.999	760	502	536	447	566	468.999	714	340	657	314	464	428	3024	783	603.999	478	407	720.998	2834	1771	2553	653	442
LIMA1	12824	22674	18361	159	197	129	6505	5117	5593	952.001	2058	4524	1861	3139	4075	2970	1459	968	1543	1282	1075	1849	366	612.001	2173	6555	5378	1892.31	1727	1609	1830	2195	478.999	782	1242	579	1217	948.001	2172	1339	934	1310	2423	1558	3137	3483	1678	1332	1321
LETMD1	1223	1276	1188	868.002	858	894.001	2609	1641	1155	2711	3917	5828	1746	3942	4820	2688	3718	1366	1902	2278	2920	3539	1385	2236	3413	4159	5314	3244	3861	3399	3804	4460	1697	4391	3216	4521	4537	3375	3694	2750.37	2717	2605	4566	3865	3357	2935	2570	7981	4542
SLC4A8	39.165	21	37	1	18	8	35.002	15	15.999	24.186	10.003	40	48	39	106.223	90.999	14	15	38	18	23.024	14.999	2	18	16.999	39	52.179	16	26	23.008	15	231.051	5	2	2	13	8	9	17	16.999	41	40	9	6	7	31	11	61.007	20.999
LAMC3	59	4	46	3	17	1	0	3	3	3	9	0	10	13	6	19	6	5	12	4	11.001	7	10	8	4	2	19	5	6	10	3	3	12	6	3	5	1	5	9	8	24	18	3	5	15	7	9	1	13
PTGER3	232	150	174.001	0	4	3	0	0	0	7	0	0	15	5	3	14	4.001	2	5	5	4	8	0	7	0	2	17.001	1	2	5	1	6	7	1	1	4	2	8	22	3	4	2	6	2	62.001	14	16	8	5
TNIP3	4	5	12	1	3	4	0	0	0	2	0	0	10	1	1	11	1	8	6	0	0	0	1	0	0	1	4	1	2	2	0	0	4	0	0	2	0	1	3	3	11	3	0	0	16	8	1	0	0
MAPK9	1136	338	757.001	235	229	272	827.999	340.999	393.999	389.999	216.999	323	315	275	181	206	174	320.001	326	255.001	222.001	354	557	660	406	313.001	636	424	661	278	903	570	211.001	320	358	318	345	498.002	550.001	310	144.999	171	278.999	304	604	749.999	377.998	343	163.999
COL23A1	0	1	8	6	11.999	1	1	1	0	55	8	82	9	6	66	9	11	6	10	11	13	25	11	10	110	43	71	21	33	16	72	48	5	5	0	8	14	23	10	16	32	31	38	33	17	27.001	20	92	40
BCAR1	2194	2963.5	3522	582	493.767	709.002	1386	2259	3622	3265.99	3178.13	2220	1668.12	5054.3	2219.99	3757.57	2420.87	1484.98	1947.99	2249.96	2547.99	1834.96	975	1182	3708	2557.32	5236.98	2812	3172	2749.32	2013	3684	867	1378	1830	2400	2658	3331	4045	3342	2109.97	1466	2406	2870	3767.03	3440	3048	6212.14	3360
FHIP1B	297	224	275	309	370	281	399	382	423	988	615	586.001	429	481	611.001	393	542.999	305	542.999	501.999	598	702.999	1126	900	1582	794.001	755.999	611	801	693.001	1009	508	809.999	563	631.999	655	861.999	743	1353	946.001	1019	1088	1062	833.001	1173	1053	671	965.999	937
HERPUD1	23531	26352	18225	8851	3753	4449	18913	4693	5683	4987	5861	5431	3239	6256	4442	2959	4823	3317	4278	3964	2854	3787	6578	8970	7591	7916	13111	4537	10949	6737	5878	11665	2843	10071	8959	9703	8379	11005	25477	6630	4138	3431	7542	9306	16374	5770	5700	7057	5685
HOMER3	1821	1072.93	2838.1	6	28	5	163	137	162	181	184	113	157.001	220.565	103	140.888	27	49	117.999	107.863	177.933	135.999	8	96	214	92	261	210.894	391.838	196	127	305.397	20.999	157.999	123	199	241.532	178.966	125.876	367.911	146	219.001	118.001	313.635	253.001	278	235.906	350.841	238.813
RAD51	253	242	213	14	8	12	424	149.001	664	21	154	148	59	468	246	205.999	227	185.999	186.001	268	326.999	228	12	57	24	313.999	935.001	1043	690.001	962	637	561	19	40.999	28	242	586.001	890	80	356.999	29	159.001	391	680.999	41.001	66.001	958	265.999	232
POLQ	44	20	24	1	7	4	124	53	184	37	97	96	20	187	89	101	124	84	91	140	193	108	4	46	13	142	288	375	261	207	265	213	14	9	2	41	132	185	69	114	22	135	110	244	68	108	444	127	76
PIK3CB	386	162	333.999	161	176	181	854	497.001	627	461	336.001	311.999	364.999	423	214	425.001	318	393.001	526.999	516	395	577.999	435	716	708	507.999	358	354	504.999	222.001	572.999	327	197	217	303.999	186	270	327	685	409.999	323	308	305.999	273	742	624	675	453	257
CYBA	1071	873.001	2054	6	30	11	415	637.999	687	38	7	1	366.001	641	53.999	942.002	22	149.001	966.999	202.999	24	30	6.999	105.999	16.001	38	841.999	69.999	108	98	68	94.001	5	2	1	8	7	28	150.001	12	19.999	12	0	4	56.001	15	158	11	59
THOC3	1498.04	2549.96	2523.82	1266.02	343.074	725.586	4769.68	1177.32	3767.44	1738.2	4740.43	5712.79	1898.17	2844.08	2988.56	1306.77	3658.12	1531.65	1804.91	1881.54	2867.83	3506.11	755.455	1193.9	2446.68	4840.07	6486.31	7261.58	9045.17	7528.53	8290.44	6096.16	905.236	3917.88	3413.71	7399.64	9689.26	9147.36	2067.57	4201.05	1256.26	1824.07	4967.65	4021.81	2643	2184.23	6136.03	4295.32	3844.68
HEBP2	1466.58	396.088	1171.38	1257	2082.05	737.049	1008.8	356	404	696.1	331	343	406.043	507.086	273	389	264.02	341.004	542.007	314.008	289.988	378.05	1679.03	2310.09	584.01	338	597.357	401.188	753.3	378.079	788.109	654.149	225	361	420.014	397.075	593.06	542.131	688	461.159	309	334.002	563.068	416.135	807.059	555	396	546.154	378.073
MPHOSPH9	385.275	518.001	397.999	104.999	132.585	108.703	258	268	462	421	578.334	738.001	324	760.04	748.999	399	904.998	474	518.001	601.163	785.999	549.999	495.457	354.001	574.998	838.001	972.083	1043.87	964.293	534.459	604	537	539.001	278	389.711	310.999	479	473.001	1044.3	624.024	841.999	843	797.999	950	903	1165	1489.32	962.463	557.207
PLEKHA5	1639.89	1322	1793.94	456.001	386.002	264.998	1649.01	1236.69	1084.28	1366.22	1203.07	1272.18	621.582	1423.3	920.785	1482.58	899.552	526.572	630.133	732.668	725.011	1120.52	1078.97	943.563	1921.93	1230	1637.72	1151.68	2040.77	1067.36	1415.18	1334.42	480.026	1057.25	581.005	945.999	1067.65	1054.43	883.765	710.539	1089.11	1161.39	1319.21	1426.69	845.874	1232.85	633.608	1907.09	1116.29
PRSS8	2	0	68	1504.9	928.793	438.359	2917.74	8745.59	7974.45	2469.89	4481.67	5141.17	1077.54	16076.1	3959.24	9194.92	1124.83	1686.33	1368.92	1804.92	1235.63	854.308	478.379	716.885	3726.51	9335.88	15209.7	702	2394.44	2857.54	1285.44	10760.4	71	3198.18	582.874	2754.72	2820.23	3130.07	920.899	2092	1480.98	1651.54	2461.67	3062.69	871	310	444.892	7503.53	3215.6
SIKE1	1673	1168	1505	503	429	413	1722	949	1114	932.999	1327	1837	875.999	1958	1075	1135	1457	1036	956	988	1364	1200	683	905	1017	1314	2031	1339	2325	1386	1533	2125	590.001	1184	1066	1942	1737	1565	1695	1947	1052	1367	1501	1502	1830	1530	1555	2235	1374
RRP12	394.001	702.038	735.999	217	217	241.001	324.001	392.999	1177	945	1856.21	2734.8	522	1475.19	2330.31	544.312	2718.69	698.182	714.609	1282.12	1772	1608.24	296	484	907	2909	5024	2864	1266	1286	1370	1356.94	566.847	421.001	1340	753.001	1081	1128	2181	4117	863.611	684.001	1714	2504	1305	791.001	3694	1391	1277
FNIP2	1332	489.001	884	2834	3632	2096	586	331	505	639.001	438.999	246	300	487	199	597	309	344	403.001	552.999	305	426	3496	2327	1355	385	433	483.001	440	332	685.001	427	196	294	279	333.001	430	490	890.001	346	281	250	631.999	237	1124	955	337	315	359.001
MSMO1	5205	7473	4238	7508	8985	7649	17298	17084	16697	21534	21215	19027	10859	26992	21405	22570	25179	22635	25972	18633	17910	17738	9036	12233	36940	32895	39520	27165	30378	25171	24834	36499	16416	11914	32132	8379	23236	12785	71450	28230	20496	17810	36158	29104	57445	35185	29321	19771	20368
TTC17	2239	3717	1924	1038	963	992.001	1323	1276	1571	1741	3730	4481	1331	4258	3435	1813	3857	1579	2054	2081	2442	2367	1762	1961	2812	4230	5635	2833	3961	1918	1874	3682	1674	1872	3305	1918	1835	1983	4538	5413	2744	3140	3154	3606	3675	2906	3774	3345	2116
ALX4	9	2	4	3	6	0	0	0	1	9	4	3	6	13	5	15	2	4	5	15	8	1	0	3	2	5	7	2	6	4	5	4	2	3	0	5	1	1	4	1	19	16	1	5	5	6	2	11	7
FSTL4	10	19	10	2	5	3	44	61	230	223.001	55	130	59	44	130	21	88.999	58	86.999	56.999	90	87	2	22	195.999	229	49	52	20	54	26	14	68	67.001	302	76	97	71.999	199	27	40	25	39	31	222	230	186	42	69
FOXN3	2799.83	1262.52	2087.08	1393.04	1761.53	1300.74	340.705	168.578	171.398	1051.28	415.066	239.995	455.427	529.964	353.866	235.06	327.507	507.402	831.918	467.764	399.439	436.41	2173.69	2807.15	1282.21	438.001	194.001	548	577	584.686	638.995	616.329	607.82	1370.92	1029.86	744.487	570	386.999	1191	213	461.145	340.196	604	218.001	1106	1009.18	225.999	673	633
METTL24	150	80	163	2	8	1	18	43	11	23	32	24	18	51	35	28	22	16	29	28	13	41	2	12	120	66	12	21	30	32	32	11	26	34	37	27	33	32	30	3	9	13	29	19	54	38	15	19	34
AKR7A2	1535.92	3947.97	4678.69	2678.74	1765.77	2236.73	4227.18	4817.11	6928.13	5345.06	8214.85	10148.1	4243.01	9470.02	13827.9	5061.35	10015.1	6724.94	7202.05	6455.77	8809.62	8101.76	2739.28	4544.79	6682.04	13105.9	11081.8	12164.9	8678.43	9888.15	8949.61	7049.35	4193.12	6753.35	11728.8	7848.16	9677.04	9884.94	17181.3	11010.2	5426.33	4642.38	11693.4	7781.13	25570.7	15804.9	14827	10606.1	9919.47
MRTO4	1144	1244	1854	450.995	436	504	1087	850.001	2138	1441	1982	2590.98	931	2561	2854.99	1214	2566.99	1329	1470	1642	2569	2339	384	1050	1458	2693	5625.99	4552	4060	3707	3557	2501	594	1639	1781	2521.99	4045	4120	1943	5578	1477	1994	4087	3946	1758.72	1400	5102	2887	3008
NNAT	5	1	1	2	2	0	19	0	5	0	1	5	0	3	0	3	2	0	8	4	4	0	0	0	1	0	0	0	1	4	0	0	0	4	0	0	2	0	8	0	1	2	1	1	6	1	1	1	1
USE1	2226	1495	2679	1462	1370	1191	1124	277	517.999	764	1065	1039	456	1036	886.977	597	949.997	544	678.999	696.998	913.999	795	1667	2615	1338	798.999	1102	1131	1640	1256	1349	1095	498.001	1724	1464	1738	1657	1502	1144	1431	949	954	1586	1136	1415	1166	958.999	1840	1500
MCF2L2	8	5	15	6	17	9	26.744	4	11.394	36	14	6.66	61.713	22	24.234	62.338	24.999	46.713	55.46	24	24.12	8	5	16	11	15.906	30	11	4	27	1	5	23.744	8	17.877	8	4	1	46	2	46	46.323	9	6	69.013	155.195	8	6	28.113
NRIP2	6.451	3.895	8.096	1	11	0	0	8.786	6.469	12.71	14.221	11.379	6.339	15.456	22.895	18.85	11.115	0	15.291	18.242	15.175	10.29	5.008	4.444	25.452	14.53	20.768	17.318	25.218	12.845	12.846	18.172	5.239	14.35	14.93	8.597	19.38	7.295	36.196	12.489	17.35	36.836	15.946	44.17	32.506	16.86	7.345	26.937	26.442
LAMA3	535.999	157.001	252	13	17	8	2227	1196	1100	199.001	780	1802	499.999	1548	550.999	1391	224	345	511.999	536	379	154	53	89	1069	1169	891	97.001	110	194	373.001	287	51	140	67	165	202.999	88	205.001	208	83	192.001	140	206	313.999	639.999	327.001	194	208
AP5M1	1826	2939	1765	410	302	418	2198	1536	2387	1367	1387	2425	982	1922	2334	1220	1508	1314	1457	1201	1320	1332	688	1108	1838	2656	4008	2306	2356	1477	1878	1643	916	605	1503	434	1136	933	3351	2628	811.001	928.999	2122	2244	2934	2680	2502	1411	1070
ANAPC4	1122	1037	1198	185	155	166.001	722	359	606	578	596	1008	451	769	765.001	420	620.001	425.999	542.001	604	675	641.001	417	422	719.999	1125	1825	1209	1119	1048	1354	846	320.999	261	479	258	800.001	633.998	715.999	1037	318.001	508	807.999	832	826.002	895.001	1329	753.999	695.999
KCNQ1	2	3	8	0	13	3	533	563	361.999	34	21	28	63	354	111	421	12	25	89	34.001	16	9	3	53	33	31	74.021	16	21	17	8	31	1	25	3	10	10	9	16	15	10	15	11	5	7	9	5	23	18
TRAPPC3	4267	7090	6732	1882	1268	1420	3687	2700	3498	2717	2940	4093	2227	3998	3607	2074	2574	2292	2882	2526	2822	2464	1705	3633	3478	4036	7400	5444	7402	5572	6627	5946	1519	4879	5062	4646	6115	6922	6275	7664	1523	1928	5636	4974	7110	5034	5829	3164	3515
THRAP3	7644.09	6532.96	8626.89	1777.56	1765.2	1564.73	2915.97	1886.99	3655.97	2419.07	3845.98	3589.99	1353.87	4298.95	2910.86	2642.94	3529.88	1445.98	1923.82	2384.96	3182.49	2776.95	1886.3	3387.37	4026	4325.95	8073.83	5735.98	7948.88	5163.93	4094.96	4724.86	1348.28	3668	3477	3128.93	4339.93	4360.92	3438.99	4422.98	2388.96	2797.97	5266.98	5647.99	3488.99	2625.99	4574	5517.71	4156.99
PHPT1	18358.4	12755.3	32273.8	2858.31	2553.1	1958	18002.5	4178.31	6589	4303.32	11242.9	8773.71	3346	11823.2	7749.86	6038.41	6137.83	2211.08	2962.44	3348.55	5241.17	5214.16	3354.28	5399.48	9349.02	6856.7	16356.5	14870.9	35281.7	19456.2	24592.5	21765.5	1829.31	14078.4	6778.44	30300.5	25428.8	22851.8	4915.3	15280.1	8153.02	8995.4	16603.5	14146.8	5566.75	3012.99	10577.9	21770.1	15211
ENTPD2	0	1	3	0	5	0	66	238	259	111	156.999	44	40	211	98	222.001	201	20	37	45	77	84.001	9	2	264	396	176	195	151	243	115	161	32	80	207	108	163	109	47	82	89	48	215	129	50	33	40	209	170
LY75	77	4	12	0	6	3	523.501	278.811	188.014	31	3	0	11	323	51	309	41	52.812	55	73	44.268	41	29	37.477	152.999	19	54	13.418	77	30	45	93.001	65	95	59	100	140	138	103.001	62.374	96.694	98	114.015	97	71.999	61	22	129.909	89
ARID4B	4217.87	2273.24	3988.04	904.031	700.188	873.999	1858.19	1417.11	1314.29	1103.13	1506.27	1530.6	904.93	1891.06	989.209	1488.75	1195.24	444.477	599.953	758.178	1047.81	1285.54	1207.96	1869.61	1360.97	1509.7	3688.28	2102.93	5009.27	2441.07	2425.98	3796.26	892.989	1764.57	1427.16	1370.42	2079.86	2017.13	1706.59	3187.06	1328.94	1990.67	2384.41	3001.43	1669.75	1504.39	1430.39	3271.82	2254.86
OPN3	1159.07	1054.15	2508.17	290.102	277.513	291.151	1166.23	309.876	153.936	510.427	620.631	335.858	283.263	751.179	201.905	377.37	425.858	457.793	432.31	358.126	371.831	326.832	931.462	725.615	958.4	230.591	1013.73	837.173	2561.46	1003.8	1642.07	1953.44	190.409	601.203	415.303	1865.67	1701.25	1969.4	721.095	944.72	674.201	460.742	756.466	1082.15	746.279	533.876	1055.03	2679.32	1038.67
SDCCAG8	2141.02	1991.87	2036.1	457.308	353.762	382.267	1985.7	1047.79	1080.53	883.76	1367.68	1286	654.308	1842.53	1361	1544.03	1065.89	421.921	620.865	669.075	756.401	1152.36	600.184	826.649	1126.85	1640.96	2775.98	1520.86	2170.1	1977.34	2271.06	1624.48	563.586	1824.79	1271.83	1552.65	2851.19	1993.58	871.999	1257.44	969.891	1269.51	2314.81	1846.54	830.469	1120.54	921.893	1777.74	2070.55
PTPRN	119	9	73	1	11	1	0	5	1	1	5.03	1	6	11	8	13	15	7.001	8	7	14	2	1	5	31.035	6	15	8	11	4	9	15.34	5	6.999	4	13	12.009	73.002	4	30	31	18.012	5	20	16	18	3	117.499	23
HHAT	24	29	44	42	47	63	220	322	227.001	297.001	676.001	923.999	416	553.999	768.001	271.999	645.999	304	345.999	362	472	516	150	171	796.999	761	926	688.001	965	418	422	832.999	225	280.999	165	179.001	267.001	363	1052	431	471	436	519.999	1126	816	887.999	503.999	1276	458.999
KIF1B	2080.93	1101	2305.16	547.972	454.994	654.543	699	852.395	1032.74	1940.14	1167.08	1094.68	1312.44	1156	616.06	1059.33	1029	1144	1403	1385.99	1137.36	1340.22	1026	1471	2071	1685.99	1842	1210.04	1832	965	1321	1501	943	818	1340	873	1192	1187	4056	1268	1148	1092	1150	1243	4253	3402	1902	1434	1177
FOXC1	157	22	89	9	13	5	279.231	49	33	1	6	4	14	5	7	17	5.554	4	13	10	8	7	3	8	9	1	88	5	8	13	15	47	2	2	2	5	6	7	11	6	12	8	5	6	20	26	10	8	8
TBC1D22A	651	1131	1894	262.001	328	351	555.001	509	827.999	1543	769	624	793.999	892.999	892.001	706	549	585.001	878.999	812	938	1231	486	1293	1859	1687	1221	1131	991	954.001	964.999	926	706	572	1231	557	884.001	924	1348	681	780	656	850.999	1178	1475	1589	1097	1901	1152
SYNE2	1882	271.001	914	413	488.001	466.001	774.999	1277	1483	1009	2398	946.998	692.998	3253	968.999	4095	2038	331.999	667	867.001	1065	3856	939	1973	1903	865	1353	1788	1406	1187	1085	1571	185	678.001	176.001	996.999	1349	883.998	543.001	546.999	1114	1735	2431	1015	322.998	484	1191	2827	2518
PLEKHH1	24.377	5.186	18.273	14.907	29.722	22.254	433.227	285.338	342.516	348.642	478.474	551.609	278.694	477.953	229.503	517.996	276.599	151.151	245.465	254.341	326.041	398.691	66.995	72.036	701.421	599.15	625.176	526.835	877.228	399.863	654.156	655.268	251.997	255.907	286.132	281.059	419.744	430.739	503.474	384.749	438.857	507.995	548.944	606.595	478.47	650.367	339.376	583.88	478.583
ATP9A	990	702	924	166	212	440	820	808	607	667	1071	828	852	1112	596	1245	634	394	662	458	721	862	562	754	1128	753	540	429	789	487	947	562	426	326	552	496	552	441	916	442	369	346	625	366	1320	1918	322	694	646
SPO11	0	0	0	1	0	0	0	0	0	0	0	0	0	1	0	0	0	0	0	0	0	0	0	0	0	0	0	0	0	0	0	0	0	0	0	0	0	0	0	0	0	0	0	0	0	0	0	0	0
CBLN4	2	1	2	25	9	2	0	0	0	2	12	2	85	3	12	8	10	12	8	9	7	9	10	5	3	8	3	4	2	0	0	0	96	75	182	6	6	4	36	9	25	10	10	1	68	138	6	6	11
CHRDL2	46.001	34	7	60	91	71	9	8	3	117	51	24	65	90	88	29	102	152	159	135	85	61	158	274	45	27	54	36	137	60	46	122	20	149	236	102	94	111	145	52	96.999	66	71	33	178	130	25	167	83
FAM168A	2345	735	1277	229	228	333	464	469	331	463	811	441	246	954	320	595	596	196	273	315	434	488	730	909	770	493	977	813	1736	775	1119	1252	288	648	546	672	915	1087	536	489	517	448	904.999	1007	576.999	483	377	1674	832.001
RELT	74.539	51	119	6.021	13.241	9.016	62.804	73.534	194.794	69	75.999	38.979	39.812	121.202	81.876	92.94	40.001	114.996	91.476	173.464	167.66	89.223	3.421	69.49	66	188.643	354.39	305.99	281.261	202.784	164.13	496.811	25	32	58.316	69.628	131.629	174.088	236.872	386.999	80.999	76.021	148.999	347.676	221.285	79	432.409	351.989	221.301
GALC	981.001	1515	836	142	136	362	1730	718.001	582	284	615	584	308	844.001	1115.02	632	438	433	337	380.001	306	287	190	1138	836.001	1020	751.999	429	480	309	351	406.001	169	300	302	262	333.001	434	682	436	372	362.001	600	636.999	628	445	756.999	718.999	415
NOP58	3863.18	2417.47	3529.01	1475.84	1351.34	1293.28	8873.39	1699.95	3460.97	1887.96	2679.62	3372.41	1434.85	3154.64	3644.76	1662.83	3343.95	1612.96	1943.75	2164.77	2930.83	3172.82	1485.94	2485.79	2223.98	4672.78	8710.45	7306.35	7971.06	6810.69	10156.8	4366.57	977.968	4675.71	3012.97	4932.91	10437.3	9924.5	4483.47	10089.6	1906.9	2709.91	7003.47	6259.3	3690.66	2082.51	6934.82	3049.19	4480.46
SZRD1	3198.86	6743.05	6510.09	1012.79	883.623	1179.14	1485.39	2485.45	5484.74	3291.79	5790.94	5600.69	2995.31	5357.3	5466.84	4129.05	5885.96	3689.89	4216.5	4505.57	5206.75	4867.1	1464.1	2758.15	3702.34	5148.54	7635.64	7095.33	4513.27	4825.67	4190.16	4214.24	1768.38	2837.99	4462.17	2582.45	4075.91	5148.53	8115.77	7640.99	2953.2	2095.68	5473.16	6194.58	8030.38	5452.12	7858.79	6151.88	3948.05
KCNH2	13	5	19	2	5	0	5	14	12	0	3	3	4	35	5	7	6	9	2	2	10	3	5	7	4	3	8	3	3	2	3	3	11	2	5	1	4	2	5	0	14	9	4	5	5	12	5	6	6
CUL1	3003	4693	2988	922	710	996.001	1675	1164	2074	1644	2385	2234.85	1104	2280	2726	1283	2218	1643	1902	1844.07	2210	1978	1104	2231	3179	3569	4644.56	4473	4846	3486	2958	2776	1053	1406	2946	849	1962	1641	4921	6355	2421	2473	4054.07	4122	3588	2867	5569	2796	2190
FAM114A2	1499	1715	1494	278	275	305.001	687	543.999	681.999	647.999	852.001	839.998	562.999	1014	855.999	513	971.998	627.999	628	615.998	690	797.999	696	795	1045	1212	1769	1190	1296	1059	1153	1035	406	742.001	1309	509.999	1044	822	1464	1748	594.001	697	1340	1100	1403	1039	1455	959	881
CYFIP2	63	180	212	1644.12	1501	1449	811.703	835.002	1449	910.981	3500	4992	722.991	3740	4786	1287.97	3229.99	885	688.99	1154	1850.99	2411.99	898.999	4172.03	2021.99	5349	10112	3746	5399	2923	2816	4206.99	237.995	2017	748.001	2107	2893	3704.99	718.001	2325.99	1304	1592.2	3470	6110	1290.93	602.999	3612	4988.85	3290.39
TAB2	1606	827	1539	801	791	645	1409	687.001	589	665.445	548	370	449	839	253	639	470.999	565	657	491	466	558	1196	1640	824	494	862	665.997	1435	506	1014	1534	395	528	678	558.001	629	733	1274	854.001	621	586.999	685	694	1425	1063	686	1625	584
GINM1	4171.35	4932	3511	1176	1080	1209	2171	2532	2041	1902	2044	2086	1804	2976	2430	1862	2390	1814	2215	1931	1865	2215	1682	2957	2302	3090	5252	3087	3956	2720.98	2763	3842	1196	2869	2765	2082	3151	2667	4817	4813	1826	2353	3691	3050	4674	3065	3499	2421	3068
EIF2AK2	2275.72	1740.19	1845.14	310.016	268.647	257	500	483	793.151	1519.88	859.818	2233.14	888.999	1175	1961.56	1842.35	2277.01	991.775	1090	1337.25	1828.99	2449.9	699.999	859	1909	1937	3088.54	1585	1333.46	1117	1616	1124.21	732.001	978.665	881	743	1510	1402	2107	1595.13	1812.51	2099.24	1898.26	2024.5	1653.54	1594.43	3107	2048.98	1744.91
USP36	640	526	741	343	410.999	315.999	298.001	416.001	677.001	653	817	969.001	347	889	870	464.999	825	319.001	363.999	511.001	723.001	818.999	493.999	648	903	1149	2456	1610	1512	1116	1184	1753	456.999	675	876.001	778	926	1081	1403	2188	540.001	628	1245	1535	1339	978	1196	1901	1268
KMT2C	2276.91	922.933	2048	527	655.908	658	940	803.999	955.001	1537.75	916.001	664	821.935	1252.94	374.848	1383.95	785.913	589.881	773.768	821.951	890.883	1106.96	1442	1535	1538.99	490.998	1064	866.989	1558.95	699.184	746.531	1956.02	869.196	539	852	509.003	630	808.001	2477.99	816.998	955.983	950.002	869.001	813.001	2643.91	2217.48	938.998	2039.87	875.913
MCOLN3	7	10	9	1	9	2	7	11	71.001	17	5	34	19	272	30.001	95	13.999	43	51.001	80	33.001	7	0	21	3	354.001	1387	6	51	41	45	107	3	1	6	5	19	21	17	10	15	13	8.999	87.999	7	17	15	26	19.999
CCDC85A	20.496	29.522	73.519	1	0	0	15.43	21	48.956	18	4	1	8.121	0	1.804	36.848	5.798	2	10.242	10.267	2	4	0	4	7	11	13.873	0	8	6	2	16.35	8	11	2.744	2	7	10	0	0	6	0	6	7	2	15	2	7	6
PUM2	1972	807	1303	1003	795	949.999	2201	1164	1214	1209	1390	1287	919	1947	653.001	1290	1313	797.001	910.999	906	1227	1544	2226	2474	1479	1104	1578	1368	2276	971	2028	1987	798.999	1261	983	1466	1303	1571	1575	1729	890	1018	1187	1086	1776	1741	1350	2159	1038
MRPL43	2443.69	3755.43	4883.63	1739.01	1332.65	1702.65	4436.33	2628.11	4349.52	3158.57	4133.72	4911.04	2993.55	4650.7	5225.05	3949.47	4847.16	2370.54	3264.65	3394.71	4241.87	4822.29	2661.12	3440.37	3474.51	4117.14	7804.89	5500.51	6043.14	5116.87	5550.51	5319.3	1417.37	4272.54	4510.39	6325.71	6673.97	7241.94	4554.77	6122.57	3019.98	2920.65	7115.76	5408.65	5861.55	4511.6	5853.83	6278.78	5088.32
ITIH4	52.61	11.793	94.428	95674.1	78182.4	93087.6	12.523	763.061	183.624	53389.6	23842.3	2303.03	12486.5	10038.6	4408.5	5664.33	37607.6	43365.6	74051.7	52457.8	28672.4	22651.3	217231	210786	43394.5	14453.2	849.416	4953.33	856.594	4654.65	2831.87	174.807	61183.9	23372.6	59067	4753.54	6403.28	6753.64	104777	11522.6	28214.2	17343.5	17996.9	2102.92	53270	31697.4	4555	10192.8	24296.5
ITIH1	0	0	16	80946	44804	57901	0	573	101	25553	13722	1643	10757	6794	2011	3464	13639	34352	37777	36222	16360	7721	76616	81959	28629.3	5354	63	1331	385.999	1134	770	32	32009	22412	42949	2008	2165	4126	88701	7353	22919	10636	6803	447.001	52319	31182	3153	3749	9101
HPF1	1928.99	1305.96	1856.98	493	376.999	366	2173.99	331	670.998	498	721	801.997	438	854.973	500.993	473.989	549	467	488.981	435.993	665.985	531	661.998	1158	604	563	1205	1292	2136	1484	1726	1001	354.998	1713	792	2060.98	2198	2501.99	747	1419	416.997	661	1285	1090	894	711	1323	886	881.999
ZFR	5136	4224	4786	628	479.001	554	1903	1487	2167	2130	3901	5713	1715	3729	2845	2407	4001	1705	2160	2237	2933	3052	1043	1231	2543	3873	4663	2522	3483	1914	2736	2998	1350	1440	1854	1685	1967	2034	5538	3766	3050	2907	2619	2941	4283	3280	5550	3600	2202
ZNF280C	97	96	92	18	20	24	37	61	85	66	171	307	78	203	159	102	219	50	84	123	194	142	50	78	132	175	259	187	220	80	126	142	123	58	83	49	80	113	589	296	111	130	97	165	665	296	435	171	109
NPFFR2	0	1	1	0	1	0	4	1	4	3	1	0	7	1	3	5	0	6	7	4	0	1	0	0	0	1	10	0	0	0	0	2	1	2	3	8	3	0	4	2	4	8	2	0	3	3	0	3	2
PHF21B	1	1	2	3	4	0	1	0	0	1	1	2	3	14	6	8	4	2	0	8	10	2	3	3	1	5	12	6	6	16	2	2	1	9	0	4	1	3	0	3	4	6	4	6	3	2	1	1	3
TRAF1	73	40	86	29	41	31	16	57	15	66	38	36	43	301	44	72	28	70	39	64	48	29	139	107	80	31	194	44	84	49	52	76	93	64	125	43	44	50	65	40	43	54	63	65	72	130	32	138	69
RC3H2	2385	2500	2451	354.999	324.999	430	713	935.001	1317	968.001	1181	1601	868.999	1598	995	1137	1268	803	893	992.999	1445	1315	665	1028	1087	1632	2606	1628	2144	1153	1525	1775	497.001	870	809	972	1281	1575	1821	2160	689	650.001	1225	1726	1668	1645	1732	1869	1087
IL17RB	26	7	65	681.798	476.539	1649.92	407	212	780.771	3702.36	2374.49	2343.63	791.999	1124.83	2672.53	531.854	5389.81	1734.9	1318.43	2281.7	3181.61	5054.83	2335.85	1670.56	3750.38	3078.72	2547.73	4476.69	3008.88	3756.87	3833.03	1817.86	2248.36	4459.89	5280.85	4265.78	6360.71	7496.72	2903.93	6850.59	7457.13	8300.57	7185.85	3497.61	4781.4	5885.25	6585.91	8008.94	5579.81
TRAF3IP2	483.926	823.001	810.001	213.999	327	236.001	740	563	990.001	774.001	1161.96	2141.97	651.816	1551	1418	1660.9	1255	486.001	729.644	779.881	1057	891.093	146	670.001	1052	1458	2933	1568	1597	1571	1403	2139.98	162	944.001	523.999	1708	1687.93	1568.92	637	1444.98	671	791	1761	1603.97	638.002	573	1318	3023	1684.2
GYG2	289.671	572	330.967	584.982	568	928	247	317	274	573	373	283	438	225	221	122	321	982	1048	577	510	231	1635	1766	808	391	393	522	908.218	475.346	615.432	399.483	593	1041	1235	387	422	580.001	992.18	217	213	139	392	533.001	2208	1897	598	397	347
DCBLD2	6500	1248	3272	495	543	453.013	7065	10302	5749	2276	3526	723	4759	9043	394.999	11366	2398	2290	6211	3128	4294	2604.3	709	886	2001.11	1347	6272.65	2270	3332	1445	2642	2699.37	472	912.001	539	3170	3676	3365.44	2142	4427	2478	2992.29	2610	1961	2203	2760	4673	5099	3973
SERPINB3	0	0	0	0	0	0	20	6	0	0	0	0	1	0	0	0	0	0	0	0	1	0	0	0	0	13.399	1	0	0	0	0	0	0	0	0	0	0	0	0	0	0	0	0	0	0	0	0	0	0
SOAT1	2498	3833	1886	451	416	476	1234	1089	1886	313	1469	1182	536	2282	1266	2145	1427	975	940	1337	1250	826	571	675	1033	1415	3502	2165.72	1367	1288	1328	701.001	259	356	589	227	859	782	1792	2119	545	586.001	1856	1900	1734	1025	3199	752.999	999.001
PKP2	843.939	191.976	111	2337.58	1089	872	1451.99	836	1798	1724.99	1976.97	2526.42	558.982	2781.99	2184.97	1348.35	2156.96	945	1198.98	1288.97	1990.99	1205.99	1089.49	1453.95	3068.96	3159	6146.12	4109	6668.98	3364.99	2642	5093.99	620	899.999	1268	1347.34	2120	2265	2455.97	3114	1896.2	2081.77	2859.98	5672.99	1563.96	1110.84	5105.99	4909.99	2125.98
MSH4	12	1	1	0	0	0	0	1	2	0	1	2	1	2	7	1	1	6	2	0	4	4	1	2	7	2	1	0	3	0	1	7	0	0	5	4	3	2	7	1	0	2	1	1	25	8	7	1	3
F7	13	5	9	5683	3730	4154	1	20	4	1758	850	295	654	298	217	144	674.001	920	1400	659	440	462.999	7120	9065	2712	898.999	211.999	177	154	254	299	70	2365	1897	4055	456	542	480.999	3434	295	1158	768.001	1016	358.001	2851	1672	173	451.001	853
GDI2	6802.94	9773.84	8836.84	4481	3495	3388	8547.99	4711.99	8012.96	6736.93	12023	15137.8	5549.99	14558.9	12334.9	8477.99	11269.9	5138.94	7221.95	7538.98	9878.97	8312.95	4955	9198	10623	14525	24505.9	16651	15622.9	15769	13685	16239.9	3711	8989.99	9515	6682.99	14045	11372	14194	15910	7964.99	7942.96	16016	18212	12888	9110.98	17023.9	19765	12933
PRDM1	40	19	9	3	25	5	158	16	32	4	1	3	13	10	47	34	7	4	22	2	5	7	3	25	5	8	15	1	4	5	4	11	1	0	2	3	1	3	27	1	10	4	6	2	37	26	2	1	6
ATG5	1600	3096	1895	653.001	488	740.001	2885	1237	1848	1308	1257	1433	925	1870	1661	1357	1445	1192	1403	1163	1327	1318	1020	1478	1697	2032	3022	2188	2488	1902	2400	2064	605.999	1908	1894	1709	2632	2675	2687	3884	957	1058	2244	1874	2458	2201	2940	1631	1472
TMCC3	10	10	3	13	26	18	52	98	47	167	172	215	64	74	200	97	107	97	99.822	140	41	113	20	73	578	382	62	75	43	49	132	47	55	55	87	50	80	42	341	28	103	31	76	36	764	367.999	133	87	76
PITHD1	1347	636	1763	794.999	785	578	1482	553	1242	2343	571	911	1670	430	1203	418	336	1573	1879	1541	1508	1988	1670	1934	2370	3018	1092	1841	1952	1681	2389	1290	1036	958	1855	1107	2645	1140	6813	3684	1113	1184	1063	2054	6115	3894	4549	2225	1578
MTA3	1949	1339	1809	201	162.999	199.999	1791	633.001	789	567.008	888	631.002	333	1065	626	666	658.001	296	486	418.002	583	574.999	385	641.999	815	926.999	1309	1040	1912	1148	1391	1273	331.001	1076	826.001	1312	1372	1496	622	885.998	612	629.001	1208	975	666	639.999	748.001	1536	1005
USP13	1106.79	893.015	1232.07	199.721	251.482	259.999	249.364	111.25	323.985	441	212	157.973	258	225.276	177.503	237.089	255.396	195.999	397	301.001	349.001	366.886	273.972	609.099	734.791	281.54	387	565.249	475.146	378.878	629.396	159.926	210.933	261.689	238.931	232.809	395.876	482.822	413.807	408.771	204.536	203.618	337.496	340.461	390.001	419.446	926.848	191.089	305
ATP11B	2202.35	712.015	1083.42	391.744	285.889	330.854	1133.44	861.979	755.56	463.404	391.509	300.722	363.913	917.999	286	738.34	331.883	457	594.212	582.477	368.46	480.993	445.089	649.059	660.109	498.485	777.731	460.375	981.318	345.14	702.895	905.001	302.532	472.652	442.852	418.892	488.94	650	1292.79	676	402.114	347.326	356.731	474.406	1378.52	920.399	832.785	793.869	305.389
LAMC2	89	80	293	3	14	10	3801	7842	4499	793	8373	2490	1640	12083	1294	8786	1466	1509	1937	1712	892	1201	1	68	2620	9825	11693	716	5725	1955	2283	10660	35	251	54	3633	2737	3026	1638	1814	1572	3108	2430	5713	842	455	267	7232	2535
CDK14	1325	685.207	928	216	240	280	303.15	132	166	438	537	1302	275	393	300	109.241	618.679	261.106	328	289	400	535	468	409.062	589.246	625.892	1183	702	2732	742.227	1433	1548	213.135	535	386.582	1042	1219	1479	636	358	403.063	284	666	1416.1	647.08	497.127	330	1517	605
SEC61A1	12516.9	25327	21655.4	2912.37	3228	3442.78	3139.34	8421.02	17531.5	14362.2	20016.7	23932.8	7778.14	23777.2	21011.6	10689.5	19754.2	8278.84	10156.9	14998.1	15624.7	14791.6	7968.05	12503.8	19924.8	27038.5	55546.8	28128.5	25266	24620.9	16058.8	35206.7	8763.09	11327.1	14275.9	13422.2	19274.9	23125.8	26503.4	27890.5	14798.2	16077.3	26472.8	35217.6	22702.8	15147.1	24734.5	37045.9	21824.8
PPP1R12A	9510.68	6388.81	7789.71	483.937	450	487.581	2393.72	1136.72	1468.19	904.256	1288.94	1332.32	619.507	1731.27	950.024	1100.6	1101.45	462.314	630.986	682.087	976.84	1098.05	744.998	1092.99	1259.69	1634.56	3772.57	2359.2	4839.62	2396.02	2609.71	3131.15	457.844	1576.97	1233.2	1861.77	2879.84	3114.58	1476.37	2711.7	1223.73	1301.17	2159.51	3137.74	1516.99	1285.94	1826.32	2795.82	1669.07
RASGRF1	2	5	12	1	1	1	1	2	7	29.999	29	50.632	11.44	41.001	178.524	69.981	62.995	5	14.873	10	26	89.657	1	6	87.141	17.001	348	13.002	121.923	29.803	36	451.737	2	11	0	34	49.967	58	2	23	26.999	15.916	36	127	16.96	14	27.69	143	74.611
CAMK2B	108.999	124.001	351.188	304.27	196.999	192.099	3	3	4	75.706	50.563	19.648	143.933	28.883	9.739	33.189	50.072	55	75.637	51.033	37.538	25.291	241.571	249.999	38.132	24	44	25	26	11	14	6	75.226	6.965	27	20.931	23.001	21	180.806	23	26.454	17.695	25.513	44	147.999	103	47.096	17.001	60
CROCC	351.919	123.125	341.256	42.134	77.169	62.237	103.016	121.934	130.141	245.787	222.633	169.187	153.238	209.014	300.342	220.221	134.245	72.001	191.158	154.052	243.554	224.671	184.182	185.284	317.339	277.899	324.052	192.938	301.872	184	256.151	203.176	264.182	259.295	272.086	185.225	270.309	251.135	262	264.86	277.541	310.191	330.159	319.281	320.539	315.999	155.979	378.097	351.864
POLR3E	595.408	1054.76	814.429	306.835	304.605	348.003	761.845	772.792	1661.81	1490.39	1456.45	3003.64	1063	1448.55	3226.55	1055.02	1462.94	1274	1781.94	1864.85	2102.03	2101.94	481.707	779.279	1762.74	2743.27	3250.99	3185.29	1694.09	2073.74	1778.66	1573.23	799.013	1146.98	1850.31	698.328	1546.88	1473.2	3220.71	4245.85	1201.29	934.443	2398.75	2477.73	2381.44	2096.48	4138.95	1584.55	1876.34
ATP2B4	7364	8457	12455	84	136	199	1139	671	330	870.001	371	90	368	760	142.001	680	298	538	640	466	360	287	456	800	745	315	198	250	713	172	155	550	578	624	630	361	256	373	810	410	353	274.001	235.999	191	1063	1386	167	1199	320
ZC3H11A	4914.1	2131.46	3343.99	971.284	1258.67	1080.02	3781.47	1961.57	1977.86	1868.44	2557.93	3197.31	1184.1	3352.48	1633.62	2579.41	2556.13	1041.64	1253.49	1600.76	2160.11	2304.24	3038.07	2574.1	2627.88	2164.28	2855.13	2023.6	4119.85	1567.52	3174.48	4082.26	1544.07	1932.58	1403.79	2042.84	2277.52	2075.87	3752.07	2510.49	2508.16	3307.18	2082.9	2081.27	3485.54	2650.66	2819.26	4371.1	2021.39
RIOK2	1803.99	1908.85	1416	437	245.999	366.999	2134	721	946.999	695	1168	1927	547.204	1217	1472.97	688	1258	541.818	682.889	747.956	934.999	978.001	318.001	678	1143	2207	3278.71	1965	3523.85	1897	2252	2131.82	503	1429	1357.97	1474	2539.97	3004.97	2505.84	2506	909.898	969.922	1700.99	2160.85	2159.65	953.258	2892	2428.85	1561.97
YIPF1	977	1671	1530	545.999	431	552.001	3314	964	1573	981	1005	1720	976.001	1070	1247	610.999	1119	1360	1315	1211	1116	1217	1221	2349	1475	1570	1998	1528	1563	1219	1945	1261	557	2202	1847	1596	1822	1877	2700	2410	605	676	1918	1390	3304	2287	1759	902	1259
NDC1	540	730	434	208	200	234	1929	1017	2338	549	1327	1345	350	2146	1250	1003	1380	720	788	964	1321	1098	331	568	692	1745	2758	2398	2469	2095	2559	1966	278	717	692	969	2029	2196	952	1786	423	726	1768	1744	844	658	3045	1435	1195
DGKG	20.001	12	26	6	8	2	31	65	108.001	134.001	149	66	99	106	135	102	75	44	61	67.999	64	45	3	33	238	179	103	113	35	57	56.999	7	44.001	28	114	33	66	87.001	224.999	131.001	91	62.999	161.001	45	221	279	142.001	50.999	130
FLYWCH1	1050.01	541.001	1320.02	80	125	86	189	171	243	784.999	369.001	338	640	301.001	359	228.001	238	273	660.999	381.998	386.011	399	454	637	863.001	513.999	711	738.007	810.999	516	658.002	600	536	501.999	681	556	512	589	1272	850	457	567	540	564	2021	1601	1547	1201	919.012
UNKL	258.955	284.224	315.67	40.588	31.924	30.611	48.962	28.418	78.644	155.055	101.499	113.474	197.41	88.499	98.016	86.105	71.47	104.427	165.183	71.883	75.204	78.612	88.133	227.193	123.422	97.725	148.011	148.03	98.77	75.478	93.464	112.018	85.919	72.78	165.388	71.921	61.828	62.893	721.317	203.419	44.198	76.473	95.063	97.072	418.648	267.537	350.798	97.296	85.929
TBXAS1	68	47.999	100.999	16	64	36	613	1169	2361	146.001	454	437.001	894.999	1724	1366	5862	1092	190	917.001	739.999	327	1550	50	227	300.002	514	807	209	16	94	136	27	12	43.001	215	159	248	71	384	432.999	211.999	122.998	975.002	46	432.999	422.999	425.001	40.999	718
PARP12	442.999	176	535	212	276.999	144	233.999	181	274.999	1758	154.999	248.999	980	160.999	301	216	243	535.999	1525	596.999	328.999	572	669	825.001	2481	471.001	259	358.999	206	226.999	636	118	709	266	538	138.001	300	322	3107	646.999	398	283	434.999	140	3409	2241	1563	206	296.999
ALDH18A1	3682	5958	3494	433	268	384	3155	4375	5177	2572	8685	12087	1848	7315	11211	3324	6610	2174	2524	3649	4217	5034	723	1503	6035	13880	17807	7842	9549	6643	6838	9869	1077	1406	2760	2312	4371	3688	5404	11394	4249	4196	11431	11646	3600	2919	7890	12036	6483
TARBP1	660.999	132	430	67	84	38	870	505	402.001	419	335	388	334.001	515	320	329.001	247	274.001	271.999	384.001	383	586.001	230	287.999	675	470	673	519	625	275.001	737	425	316.001	290	348	163	321.999	401	399.001	269	268.999	338.999	435	348	488.001	893	344	305	331
GATB	1305.79	1847	1749	593.999	539.968	825.999	1832.75	754.001	1326	1617.98	2144.46	1989.18	835.294	2292.29	2615	1034.48	2518.36	1300	1479.45	1500.48	1931.52	1947	820	2063	2328.22	2598.64	4151.45	3857	3657.91	3717.91	3580.71	2245.32	804.878	2955	2307	3581.98	5266.22	5054.99	2655.66	2771	1385.46	1754.04	3780.05	3132	3230.21	2302.12	3860.97	2894.96	3358
MXD1	656.999	521.999	336	120	108.999	139	3671	1400	1675	415	703	1910	483	1107.22	1283	848.999	780	677.999	665	719.999	613	637	147	184	649	2869	1945.22	720	1030	549	726	2998	331	262	726	430	395	427.999	5884	1512	688.44	660	621	871	5143	2089	1196	1511	561.999
CDK17	943	633	608	254.001	248	228.999	393	189	331	482.001	407	353	374	315	501	284	289	433.001	444	569.001	610	795	326	466	870	1433	448	398	764	278	541	458	321	257	285	464	600	436	1570	711	915	863.001	355	645	1012	756	1211	969	507.999
DNAJC25	460.554	149.506	299.89	1054.31	1094.55	876.456	383	134	165.927	474.243	105.416	94.278	313.966	118.103	83.628	135.164	119.79	186.525	700.247	143.63	91.861	193.895	1867.2	1778.95	940.306	76.095	202.747	283.694	405.963	186.841	346.416	438.396	437.354	218.168	334.19	277.471	228.377	206.48	896.639	316.192	506.62	244.725	200.011	139.122	1465.17	411.405	877.477	351.989	168.52
SLC2A3	1530.99	5386.9	1648.95	17.576	151.291	12.03	3408.94	1967.7	126.979	414.052	10049.8	9681.47	1571.78	14733.9	6351.63	3716.52	3979.8	110.905	431.79	58	1928.94	2728.56	18.293	40.784	1197.87	21892.8	105773	16916	63699.4	26426.3	20978.2	88498.7	6.4	1679.88	48.563	13413.3	20154.8	24372.8	41.43	3266.53	5717.9	12494.2	11590.8	44419.4	31.39	62	5342.38	62898.7	13178
PSD	59.712	104.326	115.25	61.384	66.128	53.637	19.846	13.008	39.246	52.76	46.063	55.857	43.216	68.042	71.997	47.399	56.405	49.369	75.053	64.429	80.682	73.405	56.635	70.193	66.978	38.204	77.152	68.277	82.519	61.639	50.341	58.921	48.017	62.432	90.587	43.371	57.207	61.305	85.471	81.955	32.986	65.441	76.631	68.721	93.145	67.74	77.387	61.402	60.923
CTDP1	365	94	353	83.999	169.001	78	128.999	68.999	112	210.999	68	51.999	202.001	88	84	86	63.001	80	347	91.999	81	101	196	224	537	67	168	133	198	130	197	195	165	85	149	103	120.999	127	440	200.001	180	145	113	129	492	207	806.999	143	140
YBX3	11010	1361	4299	274.001	210	160	3563	745.001	1086	1335	1419	1230	672.999	1589	1602	827	1094	335.001	628.997	784.999	992.001	1922	862.001	640	2194	870.001	2331	2084	4227	1635	4789	2976	574	1822	1353	4894	3886	3354	792	2405	1584	1988	2298	1978	642.999	543	2629	2962	2080
STYK1	3	13	9	0	3	0	132	45	152	1	0	2	21	99	7	50	0	8	15	8	8	1	0	3	0	4	495.001	2	9	2	6	137	0	2	1	1	2	2	1	3	3	0	1	3	2	0	0	2	9
WNK1	3036	1406	2451.78	913.999	1105	952	1248	1091	1091	1767	1324	1571	1260	1754.24	1061	1519	1389	1036	1193	1283	1476	1454	2338	3100	1503	1382	1899	1919	2577.09	1424	1809	2003	1042	1259	2066	977	1604	2241	3519	1991	1187	791.999	1595	1622	3447	3077	1585	2805	1457
RPS17P5	1.053	9.985	0	1	2.354	0	0	1	0	0	0	0	0	4.903	5.279	1.523	2.287	3.987	1.152	1.166	6.355	1.026	0	1	0	0	1	0	0	1	0	1	0	0	0	0	0	0	2.827	0	3.102	2	0	0	0	3.08	0	0	0
CCAR1	4547	3328	3407	732.999	743.564	572	3101	1172	2988	1830	2400.63	3368.93	1498	2358	3268	1810	3019	1384	1654	1920	2689.91	2600	1388	2147	2476	4659	8852	6642	6415	5363.43	5453	3580	1183	2218	3576	1669	5473	5154	3810	6942	1872	2392	5517	6660	3623	3231	5684	3353.65	3749
OGFR	328.777	73	307	236	341	112	100	63	94	600	114.999	141	449	108	140	137	98	134	1029	183	121	144	547	799	1240	141	209	164	173	113	220	217	520	108	197	101	136	123	566	161	504	266	149	141	853	376	1096	288	175
GNA15	2	1	2	0	5	5	2	0	1	1	1	0	10	2	3	10	0	2	0	1	3	0	1	33	1	1	2.04	1	0	1	2	5	1	0	0	0	0	0	7	0	1	4	2	1	5	2	2	2	0
CREB3L3	4	3	41	2220	3062	7849	25	159	58	1244	753	359.999	707	517	1124	379.001	2197	1268	1234	3130	1608	1180	4335	11951	1631	462	13	2050	61	458	562	9	695.999	1335	1842	120	220	74	1982	1018	979	552.001	901	24	3400	2343	1410	63	725
PIGV	750.001	1363	994.001	839.999	694	1002	1051	1154	996	1058	1820	1705	951.001	1999	1693	1098	1569	981.001	1080	992	1053	1075	1499	1496	1795	1984	2130	1829	2059	2033	1818	1936	970	2606	2650	1695	2432	2343	2841	1498	1252	1140	2481	1959	2424	1811.59	1150	1839	1715
PTPRU	183	50	128	119	155	159.998	266	560	664	899.999	1565	3062	376	2366	1899.97	778.001	1605	503	367	678.999	1215	1495	216	418	1575	2024	4139	2145	1504	1643	1866	2347	145	703	363	654	976	969.001	854	1582	586.999	737	1741	2183	553	620	1426	1972	1862
SNRNP40	1969	2912	3033	498	410.999	670.999	2172	1053	2519	1192	1899	2581	759.997	2200	2387	1016.99	2143	970.999	1193	1345.99	1915	1910	542	1123	1447	2508	4874	4280	3575	3858	3887	2529	676.001	2479	2161	2613	4151	4486	2215	5771	1035	1153	3532	3228	1976	1263	5265	1774	2458
RIMBP2	6	3	3	3	14	3	0	0	1	6	3	3	21	6	3	27	9	8	14.001	4	7	5	23	45	2	2	4	3	0	1	2	3	30	4	17	0	0	0	5	1	14	5	4	2	94	301.001	21	0	9
COL11A1	133	1	2	0	2	0	0	0	0	5	6	0	6	11	2	6	5	8	5	3	35.999	0	0	4	1	1	81	0	73	1	6	217.001	0	3	0	5	16	33	0	4	8	3	27	701.001	3	1	1	99	3
QSER1	754.278	305	638	183	149	134	491	300	460	317	403	334.001	266	595.001	149	446.999	389	223	257	302	369	480	288	413	348	286	597	651	1130.68	570	793.001	864	177	603.999	294	1094	1026	1018	563	516	305	380	445	620	495	378	613	1118.73	506
MPC1	2507	1826	3073	6272	4993	5705	3354	1466	2388	1549	1357	2564	1019	1697	2406	873	1569	3018	2284	2763	1645	1790	9945	20529	2019	1976	3611	2526	2035	2713	3175	1488	671	2477	1656	1837	2498	2165	3142	1648	582	846	2839	2272	3755	1944	2128	946	1886
ACAA1	2620.13	4114.38	4754.59	17277	17656.6	22203.6	3379.38	4986.47	10639.2	21038.4	8084.14	13610.6	10584.4	6129.62	11982.6	5918.66	5365.19	13809.9	14772.7	10682.8	9834.98	10969.8	18742.3	41295.1	20623.1	13923.3	15538.3	15436.3	9511.14	11279	12184.8	9126.5	9660.77	9892.14	16616.6	5782.16	10339.2	10343.9	35699.4	9544.74	8247.34	6121.28	12609.4	13966.9	56985.9	34067.2	15532.9	11159	11599.4
BCAT1	12006	10963	7126	1	29	6	5	19	9	233	216	231.001	188	255	545	51	259	58	73	152	271	437	3	68	668	128	590	614.999	1503	409	330	3259	7	134	92	159	257	432.999	206	1055	378	287	542	1394	68	149	621.999	589	214
HDAC7	3371.95	1975.82	4633.61	23	65.376	26	500.644	911.762	1278.71	743.255	663.14	422.413	405.198	1187.7	336.365	1503.72	435.277	294.4	422.746	450.887	633.992	465.256	9	180.877	735.179	560.496	1993.28	1008.22	1396.66	892.409	754.265	1901.21	214.54	603.082	444.255	519.96	662.144	1140.75	312.845	950.291	220.757	411.1	722.317	1194.32	199.063	282.885	781.588	1121.8	667.452
LZTS1	395	305	469	0	6	0	2	0	1	1	2	5	15	9	5	20	9	3	9	4	7	4	9	1	3	9.004	27	6	2	14	2	1	13	0	0	4	3	74	13	0	21	24	2	5	23	6	3	0	8
PRDM6	345	141.959	273	9	10	5	2	4	1	21	4	4	14	2	8	32	8	8	17	12	12	4	15	33	6	6	11	8	3	4	1	9	1	6	7	3	1	8	22	7	10	12	3	9	6	16	5	8	12
WNT8A	1	0	1	0	2	0	0	0	0	0	0	1	0	1	0	1	0	2	3	0	4	0	0	2	0	0	1	1	1	0	2	1	0	0	0	2	0	2	0	0	4	2	0	0	2	2	1	3	1
SPAG4	266	476.999	277	50	44	31	1025	811.999	131	935	1200	137	137	1439	176	1462	539.999	198	180.001	370.999	629.001	203	103.999	275	3411	563	738	453	1106	1046	428.001	877.999	457.999	825.001	1116	946	1192	1496	549	971.999	625.999	796	1306	710	513	466	145	1564	1638
NCKAP1	9061	2910	5669	739.999	706	772	4239	1967	2439	2408.16	1204	1009	1446	2000	680	1491	1090	1281	1669	1284	1235	1754	1433	2415	2417	1320	2196	1929	3235	1224	2634	2977	1151	1287	1936	1486.01	1826	2401	3263	1739	945.999	713	1413	1315	3756	3332	2099	2614	1133.42
MRPS35	1713	3128	2631	1753	1567	1698	3994	2338	4814	5592	4374	6926	3966	4917	6892	3515	6315	4628	5299	4518	5190	5807	2079	4243	4839	6576	9563	8388	7060	6983	7658	4953	1956	4919	4629	5620	8987	8735	8626	7958	2720	2594	7831	6834	7902	5810	9714	6751	6021
GUCY1B1	632	626	206	17	35	34	24	163	88	52	76.999	78	90	155	60	204	100	108	134	155	34	56	94.999	55	58	306	209.999	36	30	9	41	14	74	45	147	71	60	48	215	9	50	15	28	14	192.001	236	30	70	15
SFSWAP	1236	598.999	1216	275	407.001	224	500	354.999	543.999	818	680.999	905	461.999	749	823.001	616	461	312	486.999	553.001	809.999	880	623	631.999	776	826	1164	1046	1453	935	968.001	1379	645.998	710	760.999	918.999	863.999	754	950	1202	731.002	955.999	927	1060	988	940.999	955	1457	851.001
TNK2	345	120	411.999	273.001	352.999	154	272	115.001	161	178	99	49	215.001	113.999	44	142	35.999	130.788	217	106	110	78.001	736	661	186.001	52	140	117	148	117	132	147	194.999	129	129	126	103	125	353.601	96	62	92.424	110.639	106.001	387	392	80.999	151	170
MON2	1225	644.001	1458	582.999	590	484	630.999	460.999	526.999	1044	820	1127	490	1064	446.999	684	1021	538	625.999	888.999	982.002	863.961	1309	1113	1374	760.999	927.821	609	1061	527.999	759	1077	606	585	480.001	682.998	753.999	763.001	1172	820	700	833	663	705.001	1253	1360	560	1275	702
CDH3	12	1	239.992	0	5	6	1732	2957	2804.84	13	287.001	139	786.999	4783.81	176	3787.83	84	438	810.836	554	316.965	33.778	1	3	46	524	5610.91	24	103	128.947	75	1653.99	1	13	0	53	91	87	147	138	18.057	21.143	26	105	24	39	83	386.997	304
ARSF	2	2	1	41	30	68	0	0	0	1	0	0	4	0	1	1	1	8	6	3	2	5	72	43	0	0	7	0	0	0	0	0	0	0	0	0	0	0	1	0	2	0	0	0	3	1	1	0	0
GPBP1	2857	4055	2837	641	602.999	628.001	2442	1638	1744	1296	2736	3383	1010	3645	2654	1923	2487	952	1175	1225	1706	1924	1227	1340	2593	3969	6651	4030	8114	3679	3662	6654	988.999	1878	2129	1840	2676	1929	3191	5511	2627	3600	4172	5248	2523	1885	4177	5744	2527
DGAT2	51.999	40	57	4845.98	5748.23	4026.87	84	222	228.729	6709.2	1214	771.783	2906.05	295	878	359.179	1248	8884.24	10315.8	7694.92	2690.26	3080.58	13066.2	11404.2	5943.8	4646	186.663	693.001	189	314	875.827	187.001	6455.42	2157	6350.36	337	627	584.805	27850.5	1516	3660.58	1851.8	1215	213	30813.7	14372.4	4267.42	530	1041
ZNF112	228	296.385	181	8	18	19	148	98	111	85	307	406.001	77	287	328	251	280	50	78	101.146	187.041	197	44	48	195	406	470.611	246	343	177.001	262	240	139	140	142	109	216	194	137	318	284	439	244.005	318	78	238.211	233	381	197
CS	3816.08	8817.01	6876.05	506.061	441.908	552.038	3490.38	4481.26	9063.83	5328.44	9223.48	14219.9	5836.26	13299.2	13454	6589.93	9060.08	7867.62	8692.39	7736.43	9145.6	7015.8	1002	1669.22	8046.19	12318.4	24660.7	14270.5	11740.7	12578.7	10760.5	13934.8	4220.37	6577.49	6270.14	7160.56	10265.1	9420.4	14795.7	10418	3700.79	4023.87	11175.7	13319.6	14933.5	13896.5	15466.1	12177	9085.86
LTK	10	12	17	2	12	3	0	12	6	2	7	1	1	4	4	7	2	1	11	2	3	1	2	12	3	5	7	5	2	7	3	4	1	1	2	0	0	5	10	3	9	3	1	2	8	6	2	4	5
MRPS24	4855.73	8693.75	13716.1	4852.41	5118	4807.13	6021.41	2057.44	4497.9	2610.69	3922.7	3624	1872.41	5302.03	3411.04	2675	3215.95	2348	2754.88	3024.07	3595	3104.05	5320.04	9105.26	2948.09	2906	6814.1	6552.94	8189.57	6797.34	6558.14	6017.62	1132	6679	3334.09	7965.76	8225.79	8759.97	4262.29	5975.99	2324	2502.23	6238.25	4654.44	5847.96	3404.41	6622.14	6241.85	4916.63
ELMO2	1564.99	3891.98	1829	221.001	128.001	262.981	282.001	733	1183	621.001	825.955	1238.97	681.979	1048.92	1454	622.929	870.903	709	1037.96	776.987	771.999	748.988	339	451	1021	1349	2111.89	1293.99	1054.98	773.001	614.863	1044.87	642.001	388.999	967	185	347.865	441	2667	2293	506.94	436	1110	1268	2040	1796	1943	528	512
WAPL	1974	922	2365	752.001	601	753	1167	717.001	1199	1658	1442	1172	956	1376	1007	947	959	709	1535	1033	1066	1388	883	1467	1835	1110	1311	1324	2578	1190	1981	1254	883.999	979	822	1453	1564	1613	2449	2006	1434	1101	1289	1351	2165	1731	3213	3128	1041
VMP1	11181	10889	7783	2362	2547	2585	16131	7599	7269	9677	12693	8731	6400	12205.1	9150	6757	10221	6736	9051.97	9818	11251	9670.59	2722	5531	13844	17280	14859	13019	23674	15300	17092.6	15411.9	8414	13997	18737	15744	23300	21184	25762	15527	17005	21580	23262	19087	23582	22056	10888	22019.1	18774
APPBP2	2526	1491	2249	512	348	326	825	569	739.999	828	597	574	934.999	680	509	624	479	814	1112	880	781.999	1008	584	779	1049	1219	707	629	1122	564	938.999	774	494	458	497	468	824	687	2660	1021	821	883.001	557	790	2132	1412	1816	1484	658
POLD1	243.451	281	421.999	144	136.002	143	204.001	266	1039	524.999	1162	1802	411	1689	1903	975.998	2029	730	784.001	1020	1860	1232	163.001	540	600	1143	2075	2159	875	1054	844	1066	326	364.999	452	534	678.001	836.001	708.999	968.999	522	753.001	915	1490	754	831.999	2937	2019	1112
SEZ6	5	4	3	4	2	0	0	2	2	2	9	3	9	5	6	11	3	5	4	7	8	4	2	4	10	4	9	1	3	2	3	10	0	2	4	0	3	1	3	2	12	11	2	3	8	24	4	7	4
EIF4B	15251.6	12707.9	13393.2	5220.27	5708.92	5970.52	15863	8795.09	10114.9	10081.7	22194	34840.4	8824.9	24074	24753.4	16216.7	24357.6	6061.4	8637.87	12673	17788.9	17675.9	7981.56	15169.9	14108.3	20986.4	31101.1	19439	29047.2	14499.5	27606.7	26839.8	5529.46	11569.1	10019.6	15178.7	18895.4	18196.4	15907.9	18274.8	15817.6	14014.9	18155	23935.4	15331.4	11232	21888.6	43425.3	15905.9
SLC6A16	25	15	33	133	140	148	3	4	2	11	21	4	10	7	4	10	9	16	8	9	10	9	290.999	229	17	5	10	2	23	6	6	9	22	28	28	25	8	14	26	9	12	21	12	10	33	17	13	25	15
BICRA	293	56	191	63	109	40	66	25	53	93	42.892	45	49	52	43.001	57	51	14	48.824	36	54	68	139	150	109	71.999	137	105	167.001	101	155	127	51	87	94	79	122	109	92	80	33	58	80.327	130	151	103	75	95	96
SPHK2	318.663	325.392	608.87	229.845	240.485	220.427	108.37	320.237	656.434	819.793	853.415	2166.65	560.259	487.003	1131.97	347.185	959.843	437.196	429.783	432.908	835.615	909.827	860.707	542.677	994.812	1021.28	936.484	934.217	483.75	577.58	671.502	406.094	525.648	492.451	674.562	272.997	476.916	479.31	490.266	409.2	246.266	396.938	729.543	765.668	949.542	905.387	695.485	559.636	857.558
RPL18	22149	19419	29206	9577	9391	8356	15514	8937	23539	20707	31143	43446	14575	37004	38386	29424	32616	12314	16017	23492	31476	31121	8944	21390	17139	19809	46176	36556	41864	40345	28989	40937	5770	25382	15368	34735	36301	33229	16849	40935	22599	23086	33338	31195	18159	11695	35626	69428	37040
CA11	98	87	104	27.999	63	21	49.999	76	53	24.001	70	46	56	91.001	55.999	84	56	7	23	20	22.999	63	15	12.001	31	34.001	89	18.001	24	25	23	56	7	50	1	45	40	18	10	22	31	34.977	40	28	23	19	12	64	58
ISOC2	1126	1671	2868	2427	2133	2045	582	675.001	3012	3539	1716	1834	2024	1430	3290	1380	1800	1807	3612	2517	2138	2542	3105	5743	1842	1477	2296	1785	1572	1554	1608	1037	1280	1503	2583	1173	1375	2026	5739	2904	1398	867.998	1881	1413	4683	3936	3577	4143	1422
U2AF2	560	567.001	660	223	305.782	161	139	210	757.98	553	686	958.001	412.889	593.079	887.999	482	678	324	516.001	501.999	678	723	344.001	344	408.815	545	1000.75	1030	767	835.701	683.999	761.655	275	294	622	343	488.999	533.695	631.017	949.873	341.999	311.263	735.315	818	744.995	558.001	1150	914.999	705.999
EPN1	627.979	457.999	1092	642.297	1078.72	440.986	230	255	503	854	512	514.51	428.068	431.752	383.149	376.39	374.971	379.968	592	469.838	508.001	709	1155	1271.55	1566	1029.01	978	1234.28	1188	1098	1054	1004	405.001	669	874.001	849.656	1120	1122	1041.08	1059	436	306.446	1302	1367	1444.02	614	1210	1041.05	1163
MED29	2509	3801	3005	1344	1064	1574	1768	1241	2372	2395.99	4618	4184.97	1977	3698	3943	2089	5236	2790.98	3005	3079	3583	3190	1651	3264	3831	5177	6182	4626	2797	2994	2612	2307	1808	2602	5336	1748	2289	2307	6757	4584	2807	2317	4642	4532	8060	5279.99	4069	3704	3688
AHRR	941	1057	1752	5	6	2	4.292	26	34	3	28	123.684	7	74	214	7.799	71.191	5.437	2	46	59.341	157	1	4.433	1	52	64	49	2	36.001	1	40	0.694	2.176	8	17	18	46	1	253.39	5.992	62	55	27	2	10	272.23	28	45
GSC2	0	1	5	0	4	1	0	0	0	1	3	2	2	3	2	7	3	1	0	0	6	0	0	3	3	2	9	2	3	8	3	2	2	2	0	3	0	1	1	1	2	6	6	5	6	0	3	4	7
ZNF275	1087	827	954	681	415	1051	266	217	385	542	741	558	440	565	457	305	624.999	435	644	671.118	676	563	1289	1500	978.001	974	1021	968.001	1630	852	1016	1052	641	1445	1658	990.999	1222	1214	1844	1532	1011	555	939	1252	1352	855.999	885	1088	911
MTMR1	543	275	643	181	191	164	218	240.001	433	389	288	302.001	217	366.999	181	266.999	298	207.999	223.999	224	277	377	348	485	481.001	384.001	889.999	544	935	452	934	969	156	220	261	215	361	491.999	498	475	227	221.001	423	453	458.001	393	490.001	677.001	321
GPC1	4883	2779	16972	468	487	344	185	244	537	1684	488	831.001	1187	668.999	427	567	610	883	1902	769	978	856	582	942	1246	562	1381	1369	1303	472	754	932	313	356	901	482	504	1027	2810	1332	337	219	570.001	485	5159	3107	3076	741.001	803
ADCK1	298.001	318.999	338	69	81	51.999	154	148	392	375	363	665	354.001	344	545.998	220.999	504.999	468.001	495	558	554	534.999	168.001	356	296.001	614.001	970	973.999	410	528	552.001	290	336	474	760	231.999	454	493	935.001	802	158	163	679.999	481.999	860	909	736	184	370.001
HAGH	2356	2941.12	2620.07	17918.6	12156.1	12304.9	2899	2014	2329.12	3052.94	1890.85	1746.45	1731.69	1785	2275.06	1287.13	1882.15	2012.91	2854.66	2184.62	1651.12	2146.58	11092.9	19174.2	4052.2	1794.1	2019.02	2776.24	2992.19	2122	2762.45	2329.53	3267.72	6306.71	6072.33	1512	1899.05	2401.07	6794.18	1904.24	1704.87	1313.79	2901.18	1627	7689.4	5770.54	2403.02	1526.12	2134
RNF4	1517	5282.99	2607	488.999	438	806.001	793.999	2101	3127	2128	3764	4390	1754.46	4618	3975	2511.99	3654.98	1850	2261	2359	3004	2556	645	1151	3475.01	5938	9871	5541	5100	4632	2733.67	5605	1245	1437	3463	1017	2585	2381	5968	7150	1940	1903	4890	6082	4785	3810	6287	4684	3402
CASP8	297.395	201	170.999	181	144.001	269.999	132.954	215	372.991	884.898	695.914	1830.59	645.737	598.495	1241.76	628.998	1169.8	683.98	844.764	734.527	946.715	898.822	390.001	531	1246.92	1901.96	2092.94	1059.98	592.688	772.989	812.991	618.881	477.198	283.904	666.001	187	569.964	349.576	1729.42	654.978	713	757.931	1330.66	1454.72	1408.23	1252.65	950	688.922	908.971
LIMCH1	545	506	658	158	241	151	4725	3289	2149	1037	2780	4927	814.001	4373	1877	2072	2234	615.998	670	1001	1351	1366	307.001	575	2119	4400	7057	1223	2272	1872	3012	7893	365	709	614.999	2271	2945	2558	1359	1122	2097	1604	2445	5257	1221	1553	1637	4799	2470
INTS13	1729	1549	1701	230.999	238	228	1051	555	866	609	1475	1722	447	1871	1475	780	1424	534	577	703.001	1156	1020	386	648	687.999	1623	3034	2847	4205	2643	2893	3266	347	674	1084	875	2533	2151	1201	2736	1171	1296	2569	3191	975	1019	2634	4157	2091
TM7SF3	1436.45	894.804	2345.3	2622.29	2361.1	1708.72	4068.86	2060.4	2402.96	6004.62	2369.8	2598.4	5123.41	3338.92	3096.27	2754	3107.9	3450.99	9361.97	4069.97	3175.95	5028.35	1432.98	2601.68	9111.12	3083.72	4478.55	3363.1	3155.53	2157.06	5150.38	2014.8	2093.64	1695.43	2165.38	1940.56	3239.72	2870.11	7149.87	3253.37	3059.95	2605.04	3850.06	2529.11	9699.1	5029.15	15305	3606.66	3725.02
DLX3	2	0	0	0	3	0	0	3	3	14	4	10	20	11	4	9	22	5	6	10	5	10	1	3	5	28	99	6	4	4	7	42	11	2	3	5	3	5	14	8	7	4	9	5	13	35	13	26	17
SPA17	455.799	326.986	564.566	26	26	34	799.646	302.338	348.718	156.773	323.36	375.867	240.28	502.792	354.091	283.562	303.319	168.347	179.039	187.396	320.757	275.793	35	139.641	178.536	328.8	595.966	580.36	512.433	572.213	492.028	302.19	60	118.134	172.051	264.841	450.585	522.157	327.119	560.011	89	282.339	542.316	414.124	240.314	237.542	792.142	271.963	334.955
TSPAN32	2	2	1	12	9	1	2	0	1	5	3	1	0	6	4	3	2	0	1	2	1	0	0	2	15	0	3	3	1	4	1	5	3	1	0	0	3	1	1	0	13	4	0	1	1	1	2	4	8
CCN5	136	188	64	1	9	1	32	3	0	11	38.001	5	13	69	31	40	31	5	10	6	15	4	0	4	57	11	45.001	48	390.999	82.999	26	511	3	5	1	70.001	23	48.001	5	726.999	64.999	111	55	170	4	6	3	1182	73
DMRT3	0	1	0	0	4	0	0	1	1	0	1	0	3	0	1	3	4	0	2	2	3	4	0	2	0	3	2	0	0	2	1	1	1	0	0	1	0	1	0	0	3	5	2	2	4	3	2	0	0
ST3GAL6	155	306	125.8	2899	2269.27	1982.62	152	82	121	455.999	147.999	111	279	185.764	85	212.999	167	438.737	383.112	338.001	217.001	149.694	1802.26	1802	467.086	204.001	375.348	355.087	380.001	162	220.001	604.63	136	230	231	127	153	209.557	980	532	98.999	172.706	244	204	880.999	595.054	626.998	174.366	169
ATP2C2	2	1.001	13.266	1	1.043	0	595.765	1401.26	2279.24	111.692	299.932	1863.03	240.092	2104.77	537.567	1205.57	99.25	301.748	369.188	519.125	119.193	170	0	4.008	114.593	5188.87	13778.7	2	14.009	77.837	77.969	1095.09	3.964	2.082	2.007	82.028	292.249	415.865	162.604	21	36.084	31.995	401.381	4090.26	14.325	21.836	14.001	73.52	29.468
NGFR	4	2	2	3	78	0	0	0	3	0	10	1	60	367.575	7	5	3	2	3	8	94	2	9	7	2	6	1752	8	19	7	2	228	5	5	0	37	13	19	2	68	14.811	9	5	116	11	3	32.995	198.953	77
CDON	182.876	25	90.447	10.805	36.619	28.63	31.376	33.999	45	65.766	119.221	93.001	69	73.24	56.545	104.124	64.041	35.561	72.816	80.823	85.575	132.054	82.689	97.999	145	102	104.862	93	265.381	108.008	222.981	156.999	25.449	136	34.004	161.573	194.999	250	114.998	111	104.947	123.42	182.999	210.936	125.978	187.001	67.999	229	165
TAF2	1355	1638	1751	270	275	267.999	609.001	692.003	875.999	582.001	1037	1320	439.001	1602	951.999	791.001	1172	505.002	590	822.001	1010	832	421	633.001	875	1212	1932	1243	1588	974.001	962.001	1281	524	607.001	635	501.001	742.002	967.002	1551	1633	857.001	848	1117	1258	1190	1104	1652	1155.07	880.998
HIPK2	4412	2183	3343	741	760.999	1599	1425	1764	2046	2718	1548	1988	1363	1475	1387	1490	1962	1148	1273	1701	1322	2818	3584	4259	3486	1777	1290	1913	1780	1128	1715	1028	838	1925	2144	1361	1564	1357	3210	2351	870	687	2368	988	3746	3268	1706	1445	1835
TNPO3	1582	2789	2140	507	346	420	736	707	1579	1382	1857	2385	749	1879	2061	1104	1892	1013	1195	1426	1721	1509	734	901.999	1250	2340	3240	2571	2064	1541	1194	1587	630.001	556	1414	422	875	840	2680	3082	1058	982	1921	2445	1976	1648	3258	1839	909
BORCS8-MEF2B	19.836	26.414	30.643	0	14.796	7.214	0	0	5.825	19.468	19.976	8.827	0	15.603	10.433	20.431	11.725	10.28	10.373	22.232	25.38	13.595	5.204	0	18.299	9.542	11.623	14.78	0	21.288	11.867	35.756	8.602	11.945	24.546	14.085	5.565	7.1	41.239	59.394	18.874	0	23.828	17.294	15.648	16.017	46.38	38.367	9.705
RFXANK	2166.8	1650.22	3241.53	385.726	289.753	226.452	740.784	545.227	986.159	577.321	1354.9	1106.04	484.059	1347.73	1008.05	892.004	1035.48	446.134	661.317	638.422	1108.37	808.723	440.942	941.322	937.722	1082.19	2483.62	1671.74	2403.24	1872.82	1728.65	1539.16	319.712	1397.57	1054.08	1376.99	1972.51	2358.13	806.776	1719.15	734.112	750.698	1974.54	1939.53	1041.38	935.159	1247.74	1839.07	1691.82
TMEM161A	619	1922	1486	1203	962.999	1089	241	1273	2543	2342	3871	4220	1749	3619	4002	1821	3882	2091	2660	2809	3598	3104	629.001	1762	2662	4239	5962	6005	2921	3959	2164	2899	1092	2095	2113	884	1408	1690	5795	4199	2075	2201	4857	4756	6147	3877	5509	4660	4109
LPAR2	71	39	136	8	16	4	253	886	1458	369.001	867	868	554	1499	360	1699	525	364	632.999	558	364	393	14	61	716.001	1423	5967	566.001	747	1044	752	1683	34	312	82	443	849	1109	221.001	315	158.001	285.999	804.001	2041	194	136	196	1058	957
CTSA	12850.9	36170.7	21926	1860.21	1744.36	2078.47	2415.95	4847.39	5321.92	14085.3	18457.6	40005.5	14674.7	14669.1	41389.2	11203.1	27153.5	21890.1	21063	21476.7	23054.4	26098.4	3649.88	6875.15	16404.5	27427.1	18797.7	22635.9	6901.16	13030.9	10773.4	6013.89	8575.32	11552.7	15731.5	5071.11	11306.5	8251.58	52740.3	18192.7	12268.4	12481.7	24832	13147.2	65428.1	56179	23697.4	11052.3	22312
SUGP2	1419.97	1469.01	1752.34	319.999	446.001	301.001	596	901.001	896.983	1746.11	1518	2775.76	1377.23	1576.19	2056.6	1241.86	1341.03	1012	1408.94	1528	2031	1881.41	1285	1221.16	1785.12	2310.05	4057.2	2784.06	4409.49	1946.28	2148.06	3773.78	2233.98	1590.02	1772.13	1615.08	1790.02	2098	2817.1	2234.05	2257.33	3048.54	2568.33	3477.09	3274.84	5246.8	2200.08	3543.39	2318.72
SLC12A2	646	307	646	112	178	131	6198	9007	9284.07	2597	5800	3072.97	4642	7948	1963	17789.3	4161	1496	2662	3541	2389	7187	195	578	3162.27	4853	6430	1628	1964	1969	6506	3041	142	791	348	4087	6170	3326	814	943	816.994	1012	4844	2325	489	593	945	2624	5419
SNX24	589	550.001	624.001	169.999	151.999	150	446	211.999	231	394.999	218	221	290.001	307	225	305	236	289	381	282.999	315	242	301	454	341	260	841	318.999	778	351.999	490	694.999	200	352.001	474	370	460	678	694	358	277	200.999	398	500	797.999	646.999	282	488	292.001
EYA2	18	20	46	27	40	17	7	30	51	12	26	0	10	130	0	259	1	21	30	21	26	2	24	15	54	309.999	103	0	0	2	0	1	2	2	4	26	22	7	71	29	236.999	109	97	49.999	11	9	1	47	25
CNN2	10569.6	32955.4	26686.6	603.711	750.106	754	613.44	3633	6312.79	4049	7627.72	11390.1	2096	11390	4435.15	5900.16	4398.95	2726.52	2340	3455.96	7107.82	4594.69	548	766	6062	10135.6	24100	11883.1	12548	11283	6456.93	14573.9	215	1946.94	1075	3518.26	7310.98	9691	959.001	8809	1907.03	3457.91	7375.58	15529.2	1276.88	1594	11613.1	10814.7	8042.47
ABCA7	198.001	202.001	340	59	97.001	14	463	459.999	545	398.001	118.001	313	424	314.001	164	262	188	226.999	188	287	239.999	195.001	253.001	239	165	152.999	513	112	173	69	78	602	154.999	76	171	67.001	57.001	100	416.999	148.001	70.998	110	155	134.999	466	422.012	162	331.001	132
SNCAIP	23	5	14	1	10	4	1	0	0	55.999	23	30	36.001	10	25.001	23	11	17	15	24.001	21	16	10.19	22	51	24	22	16	24	17	22.047	6	22	18	15	13	18	11	22.999	5	15	25	20	7	26	71.001	10	16	4
DDX20	1565	3675.65	2761	122	105.181	115.085	421.998	351	709	569.443	1073.73	2145.42	450.774	1085.85	1366	557	1076	548.999	570.913	594.999	857.001	859.401	192	314	885.013	1793	3119.01	1982	2198.6	1514	1657	1441	386	486	846	348.072	1003.21	700.999	1261	3017	539	831.285	1873	2623.97	1016	1045	2266	1061	921
BTBD1	1546	889.997	1993.97	516	457	375	1608	888	761	1436	541	590	1568	621	574	622.001	498	746	2075	887	646.983	899	601	1041	2831.97	1012	1063.99	889	1375	475	1574.99	830.999	1145	361	715.999	518	712	744	3236.99	994.991	1991.91	1192	710.001	782	3790	1782	4182	1159	564
FAR2	121.323	513.979	224.349	8.824	16.148	24.701	19.534	10	10.273	77.648	26.336	23.967	27.517	23.744	69.02	24.152	38.384	45.689	32.986	39	37.398	62.163	37.553	82.862	43.254	34	34.029	34.825	28	31	46.948	16.721	27.96	12.038	17.35	22.502	23.255	25.125	60.325	22	24	19.594	35.031	29.634	99.966	81	14.704	28.68	23.522
BCAS1	7	4	13	5	8	3	3563.95	1631.03	1648	26	86.044	2014.15	78.999	137	677.322	68	26.915	32.264	36.172	36	22.999	57	3	12	142.999	1320	471.087	103.081	139	234.999	276.001	548	12	6	32	17	49	38	54	26	13	41	125.001	27	80	109.999	46.001	82	21.001
POU1F1	1	0	0	0	0	0	2	0	1	0	0	1	0	0	0	0	2	0	0	0	1	0	0	1	0	0	1	0	0	0	0	0	0	0	0	2	0	0	1	0	0	0	0	0	2	0	0	0	0
CHI3L2	35	1	6	4	3	0	1	7	0	35	25.999	22	15	55	36	19	49	30	10	27	20.999	74.001	3	2	32	26	142	31	13	22	38	74	2	28.001	5	68	45	33	10	33	7	22	47	36	25	12	35	26	72
SBNO2	824	323	696.999	137	189	139.001	266	68	164	196	111.001	171.999	134	156	157	154	136	117.001	121	187	181	178	295.001	318	171	105	243.999	192	288	159.999	290	300	116.999	130.999	146	255	220	192	216	169	117	107	129	151.999	222	208	168.999	325	184
PMS1	1287.36	1210.54	747.086	161.611	194	119.093	639.796	613	820.535	464.849	922.089	1105.84	393.558	1258.68	1084.66	610.821	1014.53	410.692	457.263	593.759	950.131	936.664	352.999	347.999	621.16	1514.34	2566.59	1858.1	2461.49	1165	1203.44	1175.13	470.002	530.332	659.001	463.525	811.489	800.582	1033.41	2332	904.655	1499	1685.77	2150.88	770.345	1216.02	1890.13	1127.05	970.003
HMG20B	2380	2806.87	5309.73	857	955	900	787.999	1417	3967	3181.53	2563.82	2717.92	3093.55	2250	3371.69	2011.6	1230	2367.74	3263.55	3647	3671.08	4698.96	1761	3038	4029	5771	3775.9	4098.92	4799.98	3619.99	2998.99	3938.8	2581	2367	3389.99	2321.99	3958.97	2567.99	6555	4754.63	3936.32	3979.87	3102	5353	6610.8	4854.57	5380.82	7539.62	4275.4
CALCRL	296	283	192.999	14	46.001	13	2	4	5	9.184	1	5	30	9	4	50.001	2	17	62	18	12	7	9	48	3	3	4	2	7	12	1	6	3	0	2	1	1	7	83	0	8	8	1	1	48	106	2	2	4
TAF11	1631	1488	1565.37	543	454.001	403.999	716	550.001	782.001	1040	1174	1861	725	1274	1327	980.004	1171	794.001	820.001	848.001	966.001	1108	545	812.002	1428	1669	2905	1974	3238	2402	2421	2788	601	1671	1313	2203.39	2528	2591	1628	2032	1203	1473	2195	2735	1642	1472	1674	1856	1839
ANKS1A	644	470	572	108	229	98	546	546	756	308	509.999	507	248.999	622.999	304	446	358	234.999	279.001	266	335	446	250.001	318.001	469.001	620	1006	693.999	869	449	800.999	988.999	187.999	312	300	453.001	494	570	607.999	811.999	297.999	303.999	541	585	606	589	497.999	856	479
AP3D1	6483	2208	8760	1920	2022	1648	2235	2470	3888	4590	2615	1948	2686	3161	1965	2293	2308	1877	3289	2564	2484	3557	3710	6797	4826	2880	6558	5391	6643	4194	6197	6083	2320	4306	5168	3655	4273	5654	5516	5128	2339	2166	5270	4855	6861	5953	3789	5639	3984
ZNF76	985	1512	1510	425.001	417.999	468.999	287.999	576.999	936	910	1359	1156	515.001	1302	1415	705	906.001	494.001	781.001	878	1216	1032	922	1084	1376	1607	2080	1878	1439	1694	1009	2073	881	1038	1608	614	1051	942.001	1332.15	1336	953	1488	1641	1806	1366	1738	1460	1452	1464
NHERF2	1511	1260	1715	9133	6787	2999	1165	2058	989.001	1514	7873	4290	1627	3597	1912	1894	2576	1001	966	1219	1817	2266	4268	8700	3473	2114	8075	4462	6457	3145	3849	3970	615	2246	1754	3282	3956	4459	2903	5655	2811	3069	7107	8681	3122	1519	3487	6553	5813
NTHL1	1092	1066	1737	2091	4557	2357	1279	624	1332	972	1337	1196	611	1330	1385	806.002	877.001	723	770.001	832	1204	1303	2654	3917	981.999	810	1359	2277	1891	2059	1605	1190	292.999	1377	1063	1742	1807	1501	1035	1539	678	1059	1746	1301	1381	975.999	2027	1355	1371
BLTP3A	526	500	509.627	102	77	190	414	234	268	465	361	628	324	596	223	240.995	359	341	359	425	496	383	229	397	579	633	853	729	586	399	392	582	326	297	526	209.612	307	420	1019	528	285	257	413	479	776	636	1004	270	316
GNAI3	4366	11622	8409	976.96	720	963	7652	3316	5299	3935	7203	5907	3326	8234	5413	4913.98	6197	3649	4545.98	4074	4804	4221	1566	2093	6539	9374	16228	9381	15003	11395	10667	13880	2689	5341	7563	7209	13392	10575	10084	11945	5386	5929	10263	12277	9420	7008	9703	13457	8739
IPO5	5922	6519	6749	873	645.001	1514	3228	1580	3243	1611	3620	5724	1489	4303	3891	2200	4280	1633	1783	2627	4051	3391	2157	2432	2365	4263	8862.99	6843	8079	4802	5813	8741	696.001	2443	1672	2639	4362	5145	2754	5135	2032	2072	4438	7233	2121	1537	9793	6738	3875
OAT	9531	10239	6430	6715	2053	466	7345	4345	5629	1775	2131	5247	3899	3942	10395	3435.99	2812	1691	4808.99	2686	2873	3163	1401	346	2357	4838	6886	3610	1652	2012	1902	3070	1028	1931	3789	730	2037	1918	8274	4166	2241	1374	3341	2103	7241	5778	4419	1996	1815
WDR3	1479	1851	1355.9	600.001	494.92	674.997	697.992	756	1369.98	1503.97	2374	3746.95	917.98	2224.96	3006	760	2850	955.091	1187.98	1375.04	1776	2093	689	1245	1910	4813	6266	2566	2820.89	1318	1929.99	1657.54	712.001	437	1069	651	1280	1226	3168	4021	1112.93	1390	2405.86	3187	2465.12	1374	4184	3020.95	1572
PKN2	1363	1471	1215	429.999	454.001	430	1275	1160	1300	839	1322	1326	595	1983	1057	1341	1230	597.999	680	782	998	1220	819	866	1444	1821	2826	1761	2568	1597	1630	1963	559	1644	1068	1415	2038	1802	1631	2313	878.001	1090	2013	1742	1562	1389	1437	1911	1629
WDR18	2396	2224	3990	1287	1828	1431	948.999	1076	2062	1521	2546	2662	995	2935	2354	1641	1566	1020	1240	1442	1878	1650	1584	3685	2611	1810	2872	3635	2322	3178	1984	1651	667.001	1501	1859	1252	2347	2696	1917	2317	1180	1105	3572	3466	2432	1956	4065	2220	3504
TRAM2	6166	6155.16	5948.97	384	315	1324	187	186	326	426	343	552.652	449	519.68	328	387	660.413	381.914	541	511	904.621	553	856	1654	490	488	2560.91	1208.88	2617	722	903	1901.91	386	482	485	451	680	2219.95	1183	1317.61	386.684	421	689	2616.63	1190.58	1009	1528.35	2205.76	723
NTN1	9	7	9	170	182	167	1	1	4	68	51	80	76	40	58	20	45	112	156	102	52	42	256	385	120	50	74	53	60	43	83	136	82	50	91	17	30	11	343	89	44	42	51	64	508	274	126	39	60
GLP2R	8	26	11	4	13	1	0	2	0	31	118	940	5	69	164	20	87	2	2	13	45	31	2	1	114	242	753	746	1799	1103	612	1304	0	15	1	58	152	323	7	302	49	77	162	2177	19	9	300	1161	122
MCM10	61	67	45	5	6	1	157	98.999	751.001	9	286	312	29	531.999	350	164	398	259	256.001	355	527	233.001	3	46	10	460	1187	1564	742	850	630	475	7	11	1	85	375	448	135	726	13	187	430	974	38	46	2380	304	234.001
DGKA	1910.59	3198	3175	10	34	8	1311	1040	1311	360.999	936.554	764.644	287.001	1371	1158.19	1209	538	239.999	262.001	404.001	457.999	616.001	6	36	1006.57	1275.91	2662	597	1416	586.002	481.32	2119	34.999	708.999	314	1080	939	937.001	206.505	1182	961.003	1232	1039	1435.25	304.824	278	600.002	2673.2	1226
ERBB3	134	623	593.002	1278	1240	1262	3684	2409	2808	4682	5269	7775	1264	3788	7181	6585	8606	1580	2300	2926	3143	6570	3742	4029	9224	8499	4767	3750	3833	4162	4952	3679	1961	5806	2635	4348	4484	3128	2956	2596	5133	3935	6896	4994	2214	2459	1710	6478	5578
ROPN1	2.638	3	1	1	2.257	0	3.086	0	0	0	1	4	3.312	5.822	0	15.955	7.431	2	9.333	4.098	3	3	2	0	1	0	1	1	0	2	0	0	4.173	0	0	0	1	1	2.174	3	3.101	4	0	0	2.003	0	3	4.343	5.116
ANKRD44	530.999	395	365.999	58	108	56.001	65	63	101	344	243.002	121	281	80.001	136.008	138.999	341.999	349	439.999	387.001	250.999	295	211	344.001	413	185	118	121.999	52.001	48.001	122.999	58	416	100	407.999	110	140	95	1027	171	418	201.001	261	71.999	853.001	896.001	112.001	77.999	143
KARS1	7349	9132.63	8656.22	1477	1218	1648	4355	2483	5594	5111	6865.51	11547.4	2972	7894.99	8436.88	4545	8550	4163	4794.01	5507	7175.83	6931.13	1961	4551	5870	9193	15125	11917	9554.48	9221.99	8171	7983.01	1899	5066	5297.56	5638	8746.97	9123.03	9084.01	12433	4643	4987	9888	10389	7598.93	5162	15067	11114	9129.02
ADAT1	766	864.999	891.001	235	270.999	296	711	762.999	1092	712	742	1258	613.978	1092	1146	594.95	1071	827	798.001	828	920	1008	431	549	684	1445	2238	1307	1004	880	1091	828.001	498	609	989.999	405	792	834	1543	1644	298.001	351.001	1209	1204	1206	1412	1277	460	706
PDIA5	2808	1699	2929	2805	2302	2154	1810	1184	1616	2717.26	1766	1080	1239	1653	963.001	1236	1033	1072	2114	2139.55	1580	1780	3701	5519	4625	2441	2006	2430	5415	2757	3614	3578.02	1729	4185	1872	4056	4555	3808	4596	3636	4855.8	4056	2546	3215	4182	2436	4093	4817	2746
TBC1D22B	300.916	811.778	394.412	43.11	67	50.907	99.01	296.119	284.295	134.986	364.25	483.54	141.424	677.731	413.807	312.249	330.301	143.436	172.949	245.472	268.966	212.09	97	94.455	249.463	450.536	946.615	370.566	409.078	278.009	215.683	589.764	109.783	282.867	218.315	259	247.473	244.656	485.463	468.807	239.503	259.71	302.022	460.308	537.642	288.114	504.525	466.064	337.103
NDUFB4	5872.8	4632.82	6303.76	4982.94	4326.63	3681.89	12305.8	3239.99	5704.91	4057.95	5326.96	5872.87	3114	6903.85	4614	5181.81	4198.95	3340.99	4164.77	3761	4906.98	3634.97	3980.99	6527.96	4789.99	3526.99	7675.99	5970.96	12782.9	8445.97	8053.98	7380.99	1726	5812.96	5179.99	9173	9615.95	10248	5223.99	6920.97	3049.96	3568.99	6805	5929.95	7581.96	4980.97	6489.99	9911.98	5635.99
SPEN	1534	716.001	1651	466.002	514.001	518	518	461	779	796.175	756	1364	488.001	854	571.001	729.999	830	450.015	529.001	612.199	743.999	1010	1038	1040	933	890.001	1468	1381.04	1486	828.999	893.001	1493	483	513.739	582	436	699	697.457	1572	1248	605.357	572.495	1063	1131	1911.03	970.224	1508	1185.17	751
MYLK	20262.2	12792.6	17412.2	2042.51	2402.45	1301.63	167.458	505.051	276.087	1334.23	544.867	1074.23	523.596	1035.67	975.107	257.594	942.933	695.028	664.381	669.752	839.3	851.758	4373.44	3937.55	1235.68	758.07	3721.53	1109.74	1881.73	607.627	832.852	1192.01	589.083	837.985	511.925	473.521	729.21	1300.03	1364.6	791.9	354.291	556.542	815.567	1362.64	1345.94	1963.67	1044.59	1956.18	757.578
ZC3H15	4672	3145	5191	2712	2143	2052	5771	2242	3815	3239	3246	4648	2432	4258	4269	2513	3859	2574	3235	3055	3629	3870	2923	4912	3159	4159	7520	6393	8388	6248	8178	5824	1701	4988	5638	4961	8358	7960	5997	9676	2914	3186	6879	5950	6639	4845	6662	5259	4714
MAP2K4	703	240	764.001	484	414	494.995	835.001	343	404	572.996	308.986	243	422.985	375.984	222.001	340	240	310	517.989	331.999	326	413.998	533	883	776	272	581	521	791	314	946	582.999	236	298	440	265	398	469	1123	749	300	253	437	374	1275	872	1006	463	278.999
PACC1	395	903.999	434.001	10	7	21	433.999	335	372	84	387	730	357	535.001	663	356	398	196	241	274	425	342	23	114	199	511	1956	772	1175	741	744	1354	76	321.999	286	360	593	737	692	2057	203	276	671	904.999	634	363	1184	569	491.001
SNAP91	3	2	0	1	5	0	0	0	0	0	1	2	1	3	3	1	2	0	0	3	1	1	0	0	0	0	7	0	3	4	0	6	1	2	0	1	5	3	0	0	3	0	2	6	4	2	1	0	1
SLK	2331	690	1897	681	562	495	3168	1458	2055	833	668	473	544	1236	370	1174	541	513	692	777	619	1008	841	1049	902	775	1072	725	1047	469	1042	938.001	346	438	580	582	677	625	1168	1007	709	521	737	519	1285	1493	840	1022	529
CYB5R4	536.999	1187	723	135.531	115	119.001	623.999	358	619	449	477	727	446.999	708	747	515	594	421	496	478	606	514.999	167	356.72	542	806	1417	1034	1028	790	856	719	267	331	535	239	841	762	642	1050	297.001	365	889	920	792	1013	989	753	576
COL17A1	2	4	3	0	3	0	3475	845.999	1801	266	266	550	117.001	137	660.001	134	269	87	127	197	256	740	1	0	959	1661	76.999	45	68	10	29	49	3	7	25	18	13	7	167	323	124	195.999	232	11	95	58	248	51	103
GSTO2	76	21	78	280	82	112.003	2382	178	1002	266.999	391.001	272	162.999	796.999	120	584	273	355	370.999	388.001	371	366	230.001	290.999	319.001	569.009	515.999	306	287.001	625	713	278.999	211.999	446	468.999	626	790	761	360	203.999	152	127	267	130	474.001	185.001	388	445.001	297
SEC61A2	367.204	400.327	430.631	267.009	233.017	234.036	89	144	188	254.378	160.671	425.079	200.326	223.487	223	133.265	194.091	165.091	239.184	165.043	259.225	212.275	588.649	419.395	381.002	254.061	541.199	621.161	761.577	400.001	472.292	559.327	228.977	149.036	301.998	106.411	381	408.107	571.723	315.437	157.11	180	388.481	612.287	567.402	547.196	541.212	277.938	223.044
PRKCQ	4	1	3	0	6	4	0	1	11	1	13	19	7	19	29	12	18	5	1	20	14	6	12	8	13	11	34	40	22	20	22	8	6	12	6	15	22	19	3	26	5	9	14	12	6	5	40	13	34
TLE2	228	87	150	96	136	139	175	238	52	55.001	28	1	12	85	14	151	13	19	37	30	20	16	214	205	48	11	49	11	26	15	7	34	11	67	13	21	15	17	18	20	29	22	17.001	10	15	18	5	31	13
ASB1	1808	919.001	1902	173	195.001	165	421	317.999	376.999	423	360	282	294	479	235	320.001	208	203.999	487.002	315.001	390.999	306.001	246	327.001	629	304	770.001	601.999	1103	479.001	779	846	224.439	232	287	526	687	830	645	494	277	382	440	550	666.999	514.999	1031	824.999	399.999
FAM107B	655	472.999	1315	2468	2286	2275	7441	3300	4200	2699	2232	1645	1474	2182	1378	1824	2227	1425	1612	1241	1697	2058	4028	4509	3556	2424	2812	2533	3120	1784	3083	1928	991.001	1386	1855	1732	2436	2000	3574	1582	1673	1698	2834	2067	3089	2243	2555	2475	1754
ME1	1600	2986	2798	81	44	19	443	774	2151	3545	2176	3406	2604	3759	3282	1253	2402	5540	4501	5039	4284	2463	372	394	2132	5872	4609	5110	3399	1884	1827	1872	1328	1088	3209	915	1627	2131	12200	4809	746	733	1794	1977	6966	3872	7909	1901	1134
TBC1D1	1201	1114	2526	455.001	327	282	1761	544.999	878.001	851.001	724.001	672.999	599	646.001	480.999	555	597	541	722	592	668	952	686	911.998	1069	912.999	777	1024	1587	808	1763	1061	422	684	682	879	1038	1085	1447	723	591	445.999	1098	615.999	1750	1404	1119	848.999	687.999
CDK13	1727	555.001	1447	432.001	557	426	834	383.001	454	600.999	505	365.001	384	463	279.999	455.998	517	256.127	376	333.999	437.002	651	986.001	1168	681.998	418	793	762	1532	683.059	1073	909.998	381	790.001	573.002	855	1258	1260	951.997	834	482.998	337.001	710	650.999	1028	789.326	656.001	1221	798.999
MTHFD2	22541.5	13121.1	9091.37	6	25.04	5.474	11390.6	1007.28	2601.94	288.549	988.268	1957.16	366.467	3658.8	1016.5	976.579	751.23	931.462	733.06	918.24	848.652	658.204	5.07	48.281	449.509	1095.07	8326.11	2674.64	4973.07	2702.09	1928.77	8148.55	119.065	1400.84	1422.08	1490.74	2182.61	3049.39	488.741	2371.17	605.62	690.397	1002.6	2296.79	217.858	447	4019.81	2676.39	1069.88
SLC9A7	1303	503	1082	169	143	174	309	521	287	364	447	392	401	573	178	387	311	242.999	363	269	293	350	470	457	536	441	712	491	873	342	743.297	797	154	297	279	468	540	626	656	407	277	235	456	594	765	429	480	762	407
FOXJ2	710	837	1155	96	115	133	745	487	489	357	423	445	410	798	381	370	384	273	401.001	402	382	478	217	304	713	853	1868	750	861	718	640	1025	336	502	452	605	690	841	1037	753	444	549	707	685	1150	562	1380	906	780
YBX1	12057.1	3980.36	16004.9	3801.85	4369.83	2685.24	10364	2841.7	5190.9	4487.01	3878.31	4765.93	3489.3	5393.02	3074.14	3483.83	3874.17	2782.36	5170.86	3478.44	4796.16	4903.06	6258.39	15427.3	19054.5	3703.42	8625.33	10609.5	13460.7	7408.8	16915.3	7754.35	2547.59	3958.07	5212.24	8616.99	12891	11457.9	6708.27	8594.26	4296.71	4153.01	8186.71	7268.66	35642.9	16246	57072.3	21245.2	10587.5
PDE4A	977	676	834	6	36.001	14	44	68	83	41	80	30	36	117	48	115	46	41	30	59	87	24	10	78	89	34	100	33	140	69	43	166	27	117	46	92	64	151	88	195	93	102	112	138	78	82.999	81	253.999	128
PPP2R5A	689	233	727	910	1061	1242	1608	527	406	630	286	176	339	443	184	430	272	394	475	316	264	418	2832	2992	1060	249	429	488	967	405	1092	579	352	635	653	1088	897	832	952	475	341	228	598	303	955	588	573	746	366
CTNNA2	4	4	2	0	2	0	0	5	1	23	15	29	9	3	62	16	41	0	1	4	3	43	0	2	87	13	16	0	2	0	2	9	1	2	7	16	17	29	2	0	4	4	4	3	2	2	0	9	10
ELAVL1	2127	1440	2755	708	599.036	542.741	1567	677	1593	1522	735	1069.83	1239.69	760.354	1159	829.001	686.001	1248	1885.06	1530	1208	1625.14	1301	1818.84	1506	855	1648	2051	2372	1510	2396.22	1539	859.205	1069	1191	1197.18	1855	2131	3242	2250	1205	1053	1374	1430	3371	1999.59	5519	1531	1088
TIE1	8	7	9	125.999	186.999	87	0	3	2	10	3	3	39	13	5	52	2	15	49	19	21	4	34	209	1	5	12	4	11	6	3	1	6	2	0	5	1	1	41	3	10	15	4	6	44	66	9	5	7
DIP2B	840	276	594	206	249	407	669	555	721	991	630	639	419	800	269	819	872	516	619.38	773	976.999	737	746	951	909	459	688	670	1143	477	812	822	313	598	399	541	604	730	1624	795	936	1005.89	786	953	1073	1006	559	1258	548
SMARCD1	407	277.999	513	61	68	47	201	173.999	253.999	233	327	275	140	308	208	228	186	119	169	141.001	285.999	252.999	141	179	382.999	331	838	752.001	1197	712	798.999	541.999	132.001	640.002	338	640.999	886	989.001	282	843.999	120.999	129	744	1012	287	223.999	405	398.999	579
KDM4A	981.842	2141.61	1291.98	162.009	162.011	220.061	438.34	773.742	918.868	1183.78	1888.31	3614.86	895.467	1924.36	2370.29	953.208	2586.57	1180.47	1166.52	1183.77	1546.42	1670.82	517.998	548	1350.05	2609.13	2722.6	1470.12	1292.83	869.273	1167.9	973.734	763.844	639.27	894.934	472.057	784.811	915.956	2195.1	1754.48	827.557	973.22	1387.38	1796.91	1822.9	1507.28	1936.77	1413.14	1082.1
NFYC	1435.76	1755.82	1823.48	697.911	544	759.575	1321.65	654	1365.79	1419.3	1674.66	2282.92	837.494	1606.48	2143.5	1220.04	1863.03	1122.91	1294.71	1368.12	1563.34	1548.51	1066	1464.19	2042.98	2015.78	3437.18	2500.86	2431.45	2410.29	2229.65	2200.38	877.501	2647.98	2089.53	1971.25	2670.38	2690.31	2560.68	3154.98	1265.48	1287.68	2498.97	2752.32	2443.5	1828.97	2624.36	2618.98	2261.14
ZMYND12	87.018	43	64	185	121	174	132.021	79	34	186.001	187.003	179	97	113.085	152.763	34.999	184	176	128.999	74.053	117	162	332.999	188	199.009	131	142.001	126	169.007	196	174.14	206.019	54	336	129	362.047	242	198.999	179.165	182.999	78	154	184	109.001	157.001	107.023	80	235	179
SLC9A3	9.254	164.567	77.558	15.903	21.508	25.668	68.202	134.311	327.657	271.434	451.111	662.054	232.052	216.794	614.833	176.788	196.428	256.042	334.781	356.537	402.954	498.733	22.536	67.825	420.209	1204.23	409.074	560.463	230.665	416.262	211.276	494.542	456.85	318.88	709.782	250.578	359.871	204.938	717.84	683.718	461.058	455.419	467.337	516.762	533.059	608.11	849.292	557.901	493.623
NGEF	1	7	27.634	388.888	613.749	521.268	331.875	576.797	540.676	1016.22	962.822	761.27	298.425	1072.07	802.695	556.584	880.166	340.239	550.834	648.098	747.691	574.657	830.958	1105.17	1707.66	1182.48	844.217	805.982	846.778	882.203	436.235	774.913	669.853	454.918	924.831	375.975	520.066	446.625	803.07	302.763	954.985	1002.93	962.922	1299.46	727.181	1030.81	303.911	1524.96	997.228
ASPM	430.999	189	480	13	16	9	343	105	737	46	188.999	132	85	439	134	260.999	204.999	222	298	374	504.999	338.001	36	489	26	153	406	883	861.001	561	664	690	36	62.001	15	157	335.999	574	266	321.999	67.999	421	249	456	293	159	1642	668	294
CD84	5	0	27	16	44	17	0	0	0	5	3.026	6	20	3	6	20	4	14	16	11	13	2	21	286	5	3	8	3	4	8	2	4	11	0	3	3	3	1	17	0	14	13	4	5	19	13	3	0	5
ELOVL1	5561	10394	11836	479	276	471	19579	12934	15345	4799	9621	9460	4495	14242	7802	7646	8009	5709.08	7140	6331	8344	6805	645	1501	7786	15142	30528	15462	19743	16185	19162	18138	2586	7121	11190	14213	20080	21760	13441	12909	5217	4934	16665	13264	20609	12668	13184	9643	11306
SPI1	0	0	3.371	1	8	1	2	0	0	0	2	0	1	5	1	1.69	2	3	4.831	5	0	1	1.288	20	3	0	6.533	0	3	5	3	0	3	0	0	0	0	5	2.264	0	7	2	0	2	4	5	5.535	1	2.807
POLR1H	773.952	605.745	837.895	409	372.143	311.776	1064.33	454.348	685.753	594.353	799.3	707.768	406.19	926.424	765.893	644.436	674.142	307.738	426.539	473.958	632.7	587.036	571.742	916.016	764.02	766.085	1173.57	931.957	1210.84	1114.18	1133.31	953.07	322.301	1080.87	899.429	1295.15	1377.4	1041.67	873.349	1393.64	628.993	668.268	1243.09	870.824	877.832	605.999	965.524	1304.89	1000.48
MPPED2	0	1	3	2	12	2	0	0	2	9	4	7.999	31	7	4	14.107	8.064	9	23	11	13	4	8	17	2	1	6	1	1	3	3	0	15	5	13	2	1	1	28	1	13	5	1	1	9	13	4	1	2
CLDN18	5	7	18	0	5	2	4	66	1923	12	3	5	5	18	9	8	4	16	2	184	2	0	0	1	4	5	5	1	3	5	11	16	0	2	0	0	0	1	1	0	2	6	3	1	16	1	1	11	2
ZBTB11	550.93	384.61	515.348	250.749	211.07	196.408	565.531	425.349	544.318	592.923	621.561	1446.91	447.263	709.879	631.326	646.867	976.636	513.653	522.648	607.697	696.057	859.525	312.117	345.72	573.379	828.037	907.436	474.483	855.337	356.115	690.744	830.82	397.303	332.119	454.57	423.382	451.927	494.593	1589.32	747.272	616.291	620.863	485.105	544.141	1730.2	1120.85	941.527	786.685	421.155
ATXN3	1804	863.001	1293	185	231.98	195.001	768.999	265.999	298.999	241.999	409.001	484	190	677	342.998	431.001	425.002	126.999	189.001	199	326.999	392.002	617.002	587.002	391.001	404.998	619.001	497.001	887.998	606	636	600.325	237.998	585	563	682	1002	994.998	599.999	992.999	453.001	567	656	621	572.853	306	614.133	762.999	632
GOLGA5	3116	4639	3208	674	533	583	1558	1517	1702	1664	2104	3301	1176	2197	2526	1364	1835	1403	1769	1822	1733	1863	998	1535	2971	4488	6367	2710	4295	2928	2812	5045	1197	1324	2893	1448	2204	1726	3805	3987	2632	2456	3360	4353	2981	2621	2372	4143	2260
FGFR2	1509	117.001	185	283	324.998	473.999	1027	750.001	842.013	614	575.999	853	303.001	1120.31	646.998	975.999	672.001	163.999	246	749.002	116.998	947.001	617	524.001	1259	1240	2241	262.999	238.998	402.999	1790	511	14	268	44.999	207	733.001	769.001	133	17	104	82	781.999	979	55	39	44.001	299.999	356
LRRC40	1244	1698	860	462	301	374	329	304	474	658	901	930	278	1014	820	509	869	405	478	502	668	618	516	548	972	1307	1599	1181	1418	809	1045	574	353	292	543	253	636	394	1399	1043	830	869	1080	1262	968	619	1261	1230	701
ISOC1	1482	1641	1147	3202	1764	3402	2947	1093	2468	3892	3577	3603	2464	2810	3514	1388	4293	3833	4622	4198	3321	3429	4061	4321	5911	4840	4907	4732	4156	4363	6251	2678	4280	7854	9508	3054	7114	5542	14933	9510	4005	2271	5910	3652	10308	6103	7471	2530	4505
EML1	640	435	622	16	24	10	206	38	122.999	113	67	217	157.999	73	149.999	42.001	107	130.001	228	135.999	125.001	150	22	48	164	227	327	203.001	264	106	180	215	42	25	78	24	103	183	391	229	77	70.999	112	224	210.999	292	392.001	164	58
TRMT11	1300	1048	804	612.001	508.001	742	2496	813	862	975.999	1537	1821	711	1672	1423	573.998	1265	802.001	889.999	1140	1084	1177	739.999	1165	1696	2543	3260	2240	4847	2548	3324	2996	985	2176	1411	2216	3825	2791	1528	2220	1835	2387	2882	2649	1235	1836	2010	3291	2293
THUMPD1	1863	1917	1631	513	504.999	430	2050	1017	1289	1038.99	1678	1894	852.997	1606	1419	1016	1429	654.001	798	777	1076	1227	840	1113	1601	1813	2459	1683	2653	1604	2010.7	1625	752	1552	1555	1013	1606	1367	2379	2906	1153.99	1427	2200	2294	1678	1398	2221	1828	1439
MSANTD3	848.869	750	1265.91	135	131.999	115.999	352	173	216	567.001	388	324.999	216.001	825.937	320.964	471.956	342.999	290.999	344	335.999	452.91	342	171	413	556.955	288.001	785.001	766	1565.9	813.998	1025	1061	167	455	486	1533.82	1249.95	1489.85	1031.93	737	463.917	538.001	522	558	902.929	653.001	1269.96	1669	841.999
KIF26A	7	2	9	3	16	2	5	0	0	0	4	3	5	17	8	11	11	5	1	5	12	2	3	14	7	14	30	8	9	18	5	7	4	3	0	2	5	6	9	0	18	8	9	23	0	3	10	8	8
ATG2B	893	470	804	307	353	422	349	189	294	283	359	197.999	192	289	150	213	273	168	203	290	275	356	1086	1124	552	248	336	329	602	332	414	393	211	426	351	329	440	534	458	412	404	360	411	459	452	338	232	763	463
ARFGEF1	1272.29	528	1256.97	264	330.999	364	1424.02	777.001	812	755.008	518	492	532.001	830	282	687	445.007	454.999	580.001	473	583.037	725.103	636.001	955.001	746	606	979.724	586	1267	507	1023	1241.04	409	567.183	611	824.007	937.997	1018.84	997	598.032	466	403	634	611	1127.91	1178.15	556.001	1130.98	644
ACSM2B	9.97	0	6.433	18581.3	20227.6	15677.1	0	39.662	27.775	20410.9	4694.53	1467.46	8201.06	1168.92	1437.07	951.506	3938.54	8797.42	10580.6	5951.46	2607.7	3376.25	27373.3	38372.4	14010.8	2429.21	164.353	426.264	155.644	475.004	450.987	9.436	13906.1	11189	10211.5	1513.18	1535.22	1119.76	31690.9	1301.77	5590.13	3857.73	4526.19	1088.71	21244.4	18299.7	899.159	898.629	2926.54
ZFAT	126.001	271	268.001	42	47.022	36	37	97	138.999	191	220	323	101.001	195	271	186	270	82.999	142.001	122.006	192	159	67	90	208	195	332	217	201	149	148	240	41	96	122.001	104	120	147	206	241	136.001	92.001	190	229.833	232.001	211	248	277	157
MTFR1	562	552.866	507	550	551.026	382.001	822	612	674.999	619	558	666.002	475	630.138	529.001	355.999	563.751	652.999	607.999	471.678	489	618	916	1041.98	836	888	1096	792	877	552.001	843	707.999	327.999	381.999	701	316.999	486	456.175	1337	776.026	470	407.001	836	750	1265.61	1002	794	644	396.999
STAG3	5.059	8.266	6.208	91.65	126.544	83.844	1	1	10.171	24.417	13.57	8.011	11.063	5.056	39.51	11.275	9.625	5.471	13.376	12.254	19.417	4.175	1208.66	459.121	25.49	8.404	22.346	6.06	7.129	8.001	6.115	22.974	14.698	11.343	12.061	10.014	2.073	13.518	29.081	8.044	22.436	10.53	7.551	7.465	43.162	24.471	21.3	24.693	21.286
FECH	691.999	1530	1033	600.999	586.999	624.001	563.999	720.001	1382	1590	939	1266.49	862	1163	1640	712.999	1663.93	1439	1904	1613	1366	1538	1344	2356	1791	2516	2369	1805	1449	1497	1798	975	703.001	995.001	1492	585	1329	1268	4331	3540	748	555	1926	1480	3710	2401	3951	1020	1069
MYO9A	1669.14	550	1434.57	126.999	139.19	129.999	518.999	270.001	245.38	232.762	116	146.722	199.338	513.955	100.902	382.429	134.001	151	180.001	127	154	196.001	254.99	307	194.999	65	834.999	201	1027	120	170	1470	246.002	166.999	229	268	248.001	611	588.002	354.001	282	261.001	192	616.999	495.345	505.265	254	1189.02	175.178
DDX3Y	902	0	811	0	0	0	0	0	0	0	0	0	1	4	1	0	0	0	0	0	0	1	0	0	0	0	0	2002.32	5466.56	1740	2245	4370.95	0	0	0	0	0	0	4432.52	3374.34	4759.5	6227	2212	2924.84	7	0	1	0	0
PFKP	6646	13848	12237	9	10	7	5639	8546	7299	6836	18400	2501	1327	26389	3982	15059	9337	2401	2025	3766	11071	2959	3	82.999	12316	14831	28462	8616	18231	13722	4825	20520	817.001	4560	4852	12140	17326	20950	2631	21722	14873	15729	15399	19106	2417	4211	11239	49518	25115
IDI1	4572.23	4078.18	3755.39	1886.03	2162	2441.16	17969.9	8497.89	10748.9	8282.05	5688.31	5170.88	4824.84	8105.05	6649.96	6270.08	8480.73	12604.6	12024.6	7832.17	8434.35	6593.85	2229.75	4051.53	16043.6	11749	18092.2	12776.1	9953.78	10301.9	9646.3	11542.4	6805.55	6525.79	15623.2	4691.4	10616.2	11798.9	30006.8	13559.5	4950.74	4707.89	11156.1	10024.6	43666.5	25034.1	17388.7	7556.48	7075.94
SP100	7728.55	7956.72	10080.1	1222.85	994.745	1014.03	4133.4	1698.03	1725.05	3344.5	3401.91	2946.87	1665.66	3338.49	2474.12	2201.8	4094.96	2042.4	2459.05	2533.91	2995.47	3142.8	1939.03	3603.53	5484.46	4450.9	4122.92	2993.87	4943.45	3898.65	4326.8	3399.1	1989.81	6259.04	5370.49	5781.48	7183.31	5560.88	5302.74	7080.91	5032.8	5718.89	7087.87	4036.21	4906.34	4805.94	2557.19	5869.98	5773.07
KLF6	13190	15232	13159	25683	16704	6248	4421	3601	4291	6874	5721	1532	1866	10067	1951	6116	3066	3145	5072	3585	4267	2531	12484	15583	7465	5559	7767	2876	10090	6153	3874	15805	3296	4592	8636	18981	8180	9142	39406	5238	5577	6136	6753	4597	33494	13483	4146	9991	8119
PLPP1	10905	2429.45	5595.71	809.036	647.325	861.516	540.339	312.437	267.538	2433.49	412.909	458.878	1123.09	384.997	549.502	306.519	521.459	771.213	1908.03	1026.35	510.663	717.246	1239.2	3197.01	2861.44	835.997	575.537	496.49	916.643	576.68	1088.36	499.138	868.036	893.061	849.047	1337.32	1240.37	1259.77	2771.53	737.712	825.19	976.716	812.908	592.442	3807.05	3163.84	1433.93	1856.04	1144.72
NEO1	3645	1550	3650	136	110	99	550	288	474.001	330	640	1720	240	496.001	1426	310	440.999	168.999	341	313.001	347	600	179	302	1084	876	953	1006	1273	782	1022	1086	202.001	625	591	570	838.999	763	741	712.001	288	184	683.999	656.999	696	472	897	880	1001
TRAM1	22852	31316	18804	2794	2312	2272	6949	6087	8593	10191	8095	12400	5724	8853	9559	4231	5498	5718	6852	8252	9831	9283	4924	7306	18407	22591	42158	17307	66230	15977	16036	33603	3682	5223	5997	8403	12702	16416	15614	24489	10935	13634	11751	46170	11737	8284	17093	52193	11549
PHKA1	93	33	20	18.003	28	25	516	211	379.001	115	74	63	107	243	53	170	65	119	241.999	141.945	88.786	110	72	106	174	81	314	82	177	61	101	191	91	35	31	48	105	121	103	148	45	34	51	63	217	182	276	167	66
TNFRSF1A	7287	10592	8373	6357	4836	7553	1715	2543	3817	6143	5075	6295	4948	4292	7415	4781.66	7535	6978	7301	7557	5286	5999	5197	8936	7888	5514	4855	5553	3147	3100	2755	3014	3827	2469	6942	1590	2488	2526	13686	5617	4064	2565.6	4819	3807	14224.6	11166	5600	5656.21	4141
CACNB1	232.71	181.001	235.001	3	9	1	2	6	15.999	11	33	17	11	91.112	32.999	64.001	30	19	29	26	48	19	6	6	29	26	158.001	52	123	48	31	152	10	22	5	50	39	42.999	11	87	74	122	41	80	15	24	48	284	61.999
EVI5	2852	3635	3805	400	438	323.001	431.001	468	714.002	1049.78	483.999	562.999	623.452	552.999	418.999	470	699	488	770.001	596.999	646.999	694	818.001	1156	843	695	865	732.998	846	467.001	523.001	743	773	392	878.001	147	310	375	1192	816	493.999	370.001	571	629.002	1214	1254	668.001	583.999	523.999
STOML1	614.001	1780	1492	246	192	288.001	168	369.001	829	1068	583	769	834.001	648.999	731	473.999	679.002	869.999	1134	787	547.001	848	358	690	1100	828.999	1083	546.038	250.001	383	301.001	334	509.999	450	1717	219	329	373	1840	642	311.002	288.999	731	428.001	2659	1832	791.999	377.001	625
PKM	26233	65892	64739	56	112.001	77.999	14292	26923	42295	5901.98	37025	36560	8662.99	58972	20355	37203	21076	8747	10130	14439	24802	12793	49.908	703	19741	33339	84559	57294	66208	54431	37021	66277	2812	13676	13947	22708	44389	64620	18264	53361	14881	16301	45244	72312	18840	18118	37836	53202	41461
DHX29	4525	2701	4618	623	572	487	1335	893	1806	1130	857	1371	821.001	1105.59	961	721	1038	849	1165	1060	1144	1065	1010	1535	1128	1606	2379	1551	1450	870.001	1209	1063	626	692	1028	425	693	1006	2577	2279	620.993	774	1196	1325	2534	2090	2337	941	814
DNTTIP2	3871	3832	3728	729	493.001	662.001	5482	1616	2677	1935	2660	3051	1405	3481	3109	1606	2831	1789	2098	1821.03	2622	2431	726	1299	2589	4838	8188	5971	8756	5985	6963	6543	1327	3720	4008	3038	7795	5688	6107	12503	2981	3948	6260	6151	5947	3273	8062	4375	4150.68
METTL22	1131	1684	1820.04	162.999	142.001	227.998	338	263	346.001	481.234	575.999	799.998	289.001	601	556	430	470.999	328.001	438.794	379	612	435.001	270	543.999	634.259	652.999	1463	876.999	1497	826	718	903.999	336	549.001	627	590	879.001	1110	919.999	830.999	454	575.999	808.001	1253	1382	1122	1044	1334	912.999
TP53BP1	1763.09	1101.73	2006.42	49.048	42.328	85.869	726.763	821.708	841.358	535.963	1176.82	1306.44	484.653	1699.52	693.802	1248.02	1251.44	354.844	450.63	709.02	1044.39	934.132	241.238	359.59	695.476	865.673	1947.5	906.817	1840.58	864.304	1100.48	1657.86	382.59	506.157	507.726	806.17	997.059	1237.99	699.429	1266.57	787.783	998.312	907.609	1406.43	602.002	811.708	716.536	1840.16	873.837
TRO	634.079	1292.15	571.371	54	67	91	6	184.999	52	146.033	446.028	654	114.149	659.999	595.66	266	653.101	110	106	90	255.305	77	330	164	158.999	326	1170.33	192	2075.51	430	281.014	2439.51	357	828	206.999	924	1104.52	967.867	196	700.298	462.342	857.001	301.236	1279.35	169.032	281.437	35.017	2946.69	660
RRP15	731	533	786	350	326	293	759	287	675	778	482	722	451	664	649	409	776	497	635	593	745	848	285	472	474	618	1141	1031	1317	1046	1406	661	267	576	503	672	1110	1064	827	1659	333	407	1089	1024	539	552	959	571	652
RHOA	26440.8	63069.3	65477.1	4251.98	3933.05	4491.19	16959.8	12265.6	21318.3	15485.9	16289.2	25191.8	13092.3	21872.2	21133.7	18811.6	19833.5	13531.1	15764.2	15784.8	19812	18073.7	6757.77	12400.4	16020.3	20147.2	33236.1	25248.8	24367.5	20762.1	20336.8	24456.6	6379.26	11010.7	12495.4	13100.2	19667.4	24054.1	27692.1	22945.8	8238.84	8722.34	20489.1	24527.4	27498.3	20002.1	32479.5	29202.1	18039.2
DHX8	1073	2105	1630	320.001	293.001	307.999	430	583.999	1055	632	1003	1503	423.999	1070	1543	793	1051	465.999	691.999	727.999	848.999	748	353	623	956.999	1595	1838	1156	830.001	632.001	674	704	333	344.001	620	240.999	465	482	1325	1415	626	577	927	1105	987	804	1580	663	554
PMS2P4_ENSG00000067601	0	0	1.899	0	0	0	0	0	0	0	0	0	0	0	0	0	0	0	0	0	0	2.65	0	0	0	0	0	1.097	0	0	0	0	0	0	0	0	0	0	0	0	0	0	0	0	13.183	0	0	2.276	0
PRKCZ	39.818	48.449	150.552	190.935	215.54	167.261	493.811	247.106	315.087	610.855	234.11	345.482	367.205	296.948	312.823	186.414	200.172	182.311	676.235	219.33	203.334	335.671	822.076	728.335	1193.84	369.951	345.007	434.456	593.533	331.229	988.157	506.698	334.702	337.786	226.767	424.261	500.221	523.933	790.991	358.488	368.818	229.226	507.905	264.976	1131.15	450.083	993.581	412.793	305.698
ZFY	328.311	0	311.173	0	0	0	0	0	0	0	0	0	0	0	2.016	0	0	0	0	0	0	2.01	0	0	0	0	0	407.511	472.474	363	389	386.999	0	0	0	0	0	0	673.535	635	248.002	282	443.564	469.534	0	0	0	0	0
IARS2	2988	6598	3494	1659	1486	1600	4385	4245	5647	3559	5177	6138	3179	6596	6103	4209	4281	3712	4476	4445	4911	4452	2069	4395	6065	9344	10850	5436	5706	3197	3727	4948	2187	2028	3329	2302	2766	3332	8315	4098	3496	3368	4593	5645	7687	5970	8148	7962	3516
SYT1	30	6	31	5	20	2	0	12	61	4	16	5	12	45	2	22	3	7	15	19	3	3	3	15	9	8	30	9	31	5	8	147	4	1	1	11	8	35	10	5	17	21	4	11	17	6	6	60	9
NAV3	1736	982	2080	0	5	1	2	19	41	31	38	30	40	85.999	31.999	35	89	40	59	43	105.999	42	1	9	15	13	111	141	55.001	54	76	31	1	7	3	10.999	25	59	95.999	267.001	20	40	70	124	253	259	518.001	82	119
IDH3G	2702.8	4782.37	6191.85	1004.6	889.019	1089.24	3921.95	2690.14	5578.61	3963.82	4519.31	5658.98	3023.02	5853.95	5577.91	4465.3	5097.7	3805.93	4511	5253.55	5257.5	4751.64	1288	3196.55	4434.41	5563.42	9192.5	8950.91	7358.17	6866.62	5770.85	5497.95	2037.65	4495.68	4734.99	4957.26	6887.09	8346.18	8472.58	5001.5	2668.25	2527.23	7321.42	6643.95	11975.7	6525.08	7827.51	5903.3	5485.38
ROGDI	1363.65	619	1688	546	583.999	358.631	1007	538.999	736	360	551.001	644	614.432	500.312	509	310.999	247.209	410	673	438.999	450.633	383	996.608	1519	960.002	716	570.297	609.325	817.999	562	702.001	418.999	474.001	596.999	859.999	335	566.999	517.999	1416.33	830	332.999	491	780	507	1906.44	1038	562.252	357	483.999
PDZD4	54	2	7	4	11	1	3	0	1	3	5	2	2	6	5	8	3	1	4	2	5	1	1	2	4	3	8	4	17	2	1	5	1	0	0	7	6	13	1	1	2	7	5	7	3	8	7	19	9
ATP2B3	2	4	5	0	13	3	1	0	4	3	6	3	4	5	3	21	6	7	17	6	20	6	0	7	7	4	11	0	3	4	3	0	4	2	0	3	2	2	4	2	8	5	1	2	16	2	6	9	7
ROCK1	5350.54	2972.82	5023.33	963.128	955.495	956.103	2002.61	1182.25	1616.94	1528.08	1455.3	1598.2	1029.22	1598.49	1219.66	1488.45	899.338	731.526	1077.4	1058.18	1397.08	1534.47	1832.67	2709.45	2038.5	1932.66	2938.37	2059.36	2972.86	1464.06	2057.98	2368.95	931.783	1112.72	1319.2	1332.33	1449.33	1660.54	2434.02	2352.95	1472.78	1315.3	1692.97	2095.8	2560.77	2565.84	2133.18	2885.55	1675.91
CBFB	1481	942.999	1252	373.001	249	265.001	853.001	479	951.999	627	370	302	386.001	533	280	628	490.999	328	655.999	470.001	565	505.816	277	395.001	805.002	598	906	758	1008	494	1210	488	217.001	364	410.999	372.001	572	670	1038	1083	507	285	595	638.999	1062	665	1567	619	444
PDK3	141.001	255	218.999	196.999	185.001	398	790.999	664	471	1087.07	949.999	573	561	1476.77	480	1243	990	725.002	1144.99	960	907.001	764	513	767.999	1453	683	1446	757	1893	917.001	625	1693	512	723.999	924.999	735.001	905	1962	2059	780.999	959.001	776	984	1438	2253.1	1678	920	2211.15	1108
HYAL2	1702	1809	3210	439	494.001	429	845	2548	2515.47	1307	1706	1767	2018	2367	1789.84	1634.45	954.999	829	2298.97	1257	1614	1436	315	813.999	2315	1759	5133.84	2698	3163	2282	2184	3760.95	764	1537	1208	1793	2340	2459	1874	3253.77	1413	1305	2505.37	3032.99	2334	1890	3761.41	2034.96	1926
HDAC4	357	192.954	343.001	58	65	74	251	151.999	208.557	198.999	170.999	241	183.995	287.999	151.941	531.953	207	91	223.648	172.001	173	209.962	124	227	259.988	124.988	342.973	252.001	279	169	271.001	226.001	130	146	192.001	102	131	186.999	227	198	113.615	137.999	212.001	179	145.999	269.001	166	258	162
RASSF1	1391.08	3957.65	3522.45	260	247.58	330.205	238.582	563.14	1268.13	1704.1	1414.6	2813.49	917.057	2525.37	2140.25	1236.06	1266.4	1113.72	1485.08	1168.21	1458.42	1078.07	160.029	410.911	1745.95	2225.69	6080.89	2944.19	3050.16	2880.91	1685.2	6299.02	1031.55	1648.1	1631.37	2054.82	2164.47	2529.75	4877.05	2836.31	1394.26	1747.96	1956.91	2729.45	3549.6	3061.54	2643.86	4341	2723.7
FGFR3	21	5	22	253	332	328.999	301.999	315	360	509	322.999	283	448	384.999	108	296.999	222	185.001	466	230	210.001	222	503	560	805.999	395.999	3053	403.999	1540	491	1019	2240	577.001	425	594	417	543	1377	711	356	341.001	174	476	1962	884.001	476	331	998.999	402.999
IFI35	1767	3306	4140	868.001	602	716.001	973.001	816	1315	3053	1153	1453	1091	937	2450	941.406	2066	1366	1721	1485	810	2255	1481	2727	4698	2898	1119	2053	946.999	1560	2430	472.999	955	2028	2505	1254	1800	1633	4447	1121	1432	897.001	3473	1008	4832	3154	1733	954.001	1838
HEATR6	1353	1415	1219	73	58	67	381	257.001	411.001	414	710.001	902	222	922	644.999	376	767.001	214.001	265	358.001	537.999	567.998	180	243	516	1236	1934	769	1320	565	682	951	201.999	310	287	385	446	562	540.999	1029	538.999	649	736	994	379	397	847	1272	546
COASY	1592	3537	2562	1555	1210	1279	1768	2780	4990	5286	6204	8006	2876	6572	7386	3240	6352	3568	4423	5448	5808	5344	2241	3667	7289	8685	11745	8165	3139	5154	3248	5075	2752	3433	6438.96	2173	3009	3574	8297	7457	4135	3534	7006.87	7358	8925	6383	8091	5871	5839
PLEKHH3	244	104	254.001	99.001	165	40.999	209	72	143	425	132.521	276.001	272.326	146.064	233.999	224	167.365	329.001	338.999	319.001	256	233.954	455.001	259	192	113	233.001	169.044	372	153	220	293	279	314.001	223	281	251	231	361	142	222.999	261	180	211.999	356.999	436.624	217	513.808	196.999
MEF2A	2946.05	3923	2687.63	481.16	548.923	411.875	571.986	394.756	345.826	655.633	594.607	646.809	332.644	672.554	337.07	464.222	519.131	407.011	437.307	485.873	446.989	468.549	1013.06	1091.39	564.43	442.199	939.11	422.905	892.097	369.316	496.299	758.548	497.19	517.958	625.338	490.238	489.069	521.816	1121.96	737.424	508.197	511.202	477.832	534.237	991.925	879.399	460.14	900.197	399.626
OTUD5	1117	681	1679	719.001	756.999	648	482	370.999	387.001	463	428	361.999	269	571.001	266	350.001	340	236	357.001	292.001	374	388	1085	1507	628	366	896	578	1215	586.001	894.999	1128	346.999	593.999	653.999	710	740.001	909.999	787	605.001	397	509.999	619	653	970	524	540.001	914.999	600.999
TFE3	1364	1293	1907	376	335	298	220	342	449	616	467	543.999	480	736	434	523	479.001	481	611	605	721	613	781	1468	615	550	1197	825.001	1011	668	637	1434	363	444	784	523	629	693	1397	952	419	375	682	786	1726	923	849	1117	666
TBC1D25	513.982	604.633	1009.91	139	138	117	133.289	217	280.867	451.756	405.791	419.391	209.57	368.702	436.66	254	274.853	307.836	329.855	391.237	443	457.853	259	368	624.616	749.523	824.457	462.732	761.971	516.265	393	880.507	244.949	347.782	454.714	414.632	561.902	521.883	786.822	810.304	451	439.532	524	837.801	656.73	644.757	614.727	1205.97	589.827
ACSL4	2291	1900	1963	245	68	56	1274	1705	1210	9789	5071	5516	5560	4311	1921	2927	7035	9467	15529	13467	5508	4256	809.001	1420	11919	3291	3296	1650	2787	2358	4173	1990	13993	5671	12205	2986	3464	7183	36507	1419	5415	1807	3732	4146	19004	6635	1259	2352	2917
INPP5A	1456.43	680.671	1682.29	228.236	203.617	246.604	184.747	164.344	181.088	358.272	183.846	127.817	218.871	190.884	120.362	163.199	138.23	209.594	282.344	174.963	191.959	231.121	511.592	476.874	338.278	184.956	224.752	271.663	420.078	174.302	442.831	182.26	194.119	221.9	308	201.347	274.975	224	400.178	225.297	126.951	99.026	206.41	136.417	780.398	482.984	302.665	203.205	106.189
GPKOW	1090	1314	1909	474	372	524	1179	471	821	622	758	683	332	1018	904	624	719	454	584	545	654	698	514	969	857	991	1494	1213	1696	1319	1190	1390	353	1182	997	1410	1447	1477	1343	1396	644	556	1360	1163	1073	782	927	1108	912
GRIPAP1	1665	1975	2112	754	687	604.002	805	1330	1328	1314	1982	2122	1083	2473	1540	1611.24	1934	795	1191	1169	1567	1570	1443	2099	2125.01	2886	4681	2456	2690	2133	1761	3403	1392	1371	2122	1170	1581	1545	2373	2819.35	1944	2503	2816	3614	2377	2365	1385	3608.02	2386
FTSJ1	1203	2361	2400	190	180	234	430	880	1817	897.999	1911	2629	708.999	2843	1813	1190	1889	831	972.999	1336	1807	1318	270	628	1408	2153	6729	3220	4142	3127	2233	5958	410	1261	1167	1847	2945	3387	1514	3158	900	1225	2984	4537	1656	1242	3339	3798	2621
PRR11	472.261	186.211	298.637	4	17	7	467	110	698	20	303.999	228.999	37	720.971	174.999	434.994	329.001	238	268	258	597.999	199	23	154	5	253	1409	1317	1292.96	1193	972.001	1234	14	45	5	366.719	743	985	70	374	45	176	500	1046	26	46	1066	776	519
REEP1	9	13	21	2	17	8	220	282	654.999	205	72.999	665	181	178	779.001	79	214.999	411	250.999	341.999	216	306.999	17	16	129.001	480	419	274	403	217	247	399.999	36	15	41.001	73.001	157	271	478	238.001	62	50	110	466	369	564	465	197	81.001
ATP11A	1443	1845	1177	202	169	299.999	996	1696	1996	1544	1827	2232	1109	2087	1797	2368	2177	695	837.001	1222	1172	2680	535.999	903.999	3209	3234	2988	2294	1295	1519	2540	1690	552.001	927.999	1131	843	1562	1671	1421	1437	811.001	626	2449	1772	1627	1701	1585	1467	1947
POLR1A	946.001	650	1350	218	206	191	243	337.001	814	1230	902.001	2396.45	758.999	839.011	1123	699	1803	624	733	968.001	1368	1458	297	692	1200	1361	1930	1615	1061	860	1256	635	552.999	425	862	351	726	981	1344	1576	404.001	483	1176	1141	1545	1517	1541	749	933
LAPTM4A	31343	35720	23425	9361	6655	7179	22400	10883	8385	13007	16397	19293	10196	16362	12532	10634	15301	9591	12812	9810	10450	13302	13935	17117	19585	20473	25120	18058	37744	24136	31626	29612	7045	32293	17024	41803	37834	34246	34822	22154	10351	11012	29347	29895	29701	16944	13546	22993	20667
TTC7A	563	452.421	756.183	83	134	164	436	556.999	850.039	540.986	411.001	731.141	457.347	556.446	553.47	485.999	477	304.022	539.463	320.001	380.316	432.137	362.999	627.999	568.093	1020.07	2751.08	903.193	854	783	578	1683	226.016	181	375	318.001	456	617.144	903	492.999	295.394	385.513	601.998	999.999	1167.78	585.586	843	877.999	476
IP6K2	4709	5552	5814	1222	742	791.999	4605	3253	3518	3438	8589	9659	3417	7996	7644	4221	5016	1634	2477	2707	4540	4418	1795	1705	4598	6426	10668	8478	14563	9310	8312	11184	4374	8248	5520	10493	11214	11108	6056	10480	5397	12593	10855	10546	4987	6644	5942	11279	9465
STON1-GTF2A1L	10.937	68.579	0	0	0	0	0	0	0	6	0	0	0	0	1	6.547	0	0	1.46	2.932	0	0	0	0	0	0	0	0	0	0	0	0	0	0	0	0	0	0	0	0	0	1.432	1	0	0	0	0	23.061	0
SRBD1	598	953	602	146	162	159	384	311	684	495	668	945	280.001	747	896	436	913	388	405.001	490	611	634	345	465	654	1124	1304	680	717	412	582	444	318	202	386	191	369	298	531	544	444	595.001	604	966	491	381	855	761	424
KIF2A	1695.32	1146	1578.2	153.968	108.691	121.119	1146.53	667.351	872.084	747.618	702.555	813.088	534.729	1100.06	651.627	782.043	752.469	419.438	524.145	525.179	653.335	821.88	217.049	389.232	800.474	953.979	1587.51	970.749	1751.48	890.742	1218.6	1517.65	195.387	455.264	411.991	808.104	1001.59	874.196	786.301	1212.87	486.877	559.63	1001.84	1144.27	740.797	882.748	800.828	1383.42	896.593
RASGRP2	58.001	67	128.999	4	35.001	16	3	3	3	33	18	7	8	4	13	13	26	11	19	88	35	30	33	33.001	14	23	21	12	3	7	9	3	16.001	9	64	12	9	9	125.001	25.001	63	44	28	5	67.001	36	37	22	22
PSME4	1850	792.001	2427	891	945	724	1034	747.001	1305	1144	588.001	626	849.171	999	438	653	548.001	723	899	840	666	961	1167	2350	900.999	828	1336	995	1242	531	1168	996	446	359	772	407	660.999	929.999	2042	1051	373	332	732	589.999	2654	1745	1274	787	547.001
IFT80	1798	1552.01	978.86	43.396	45.168	36	386.441	472.376	427.13	672.715	1458.62	1049.94	310.955	1354.55	571.478	708.128	2075.32	1854.28	374.441	3118.85	1782.04	716.919	204	233.614	593.469	1737.41	1882.68	1681.27	3664.19	1311.36	1395.79	1010.17	381.411	646.577	469.351	722.526	1562.61	2522.95	3474.44	1248.09	2457.7	2467.15	1404.95	3040.35	1975.54	670.82	933.065	4972.86	1813.01
SIRT2	2740	7572	7426	1216	798.999	1164	784	1554	2282	1949	4298	3700	1643	4512	3847	1905	3452.11	2448	2321	2668	2926	2431	1281	2013	3253	4301	6156	4980	5440	5515	3659	4347	1560	7006	4971	4055	5776.32	5606	5925	5619	3551	2957	6044	5102	7416	4945	3995	4966	5025
ERLEC1	5293	7584	5285	1037	879.001	792.002	6267	5299	5046	2809	3478	4704	2627	4851	4137	3005	3601	2337	2995	3104	2605	3203	1326	2102	3948	6046	11452	4258	6071	4832	5532	7210	1338	3063	3891	2809	4546	4102	5314	6538	3399	3073	6092	6316	4509	3549	3840	4280.73	3929
PPP2R5B	618	358	751.999	70	86	49	87	145	145	168.999	101	93	108	154	96	95	87	43	110	93	82	116.001	107	135	238	70	248	105	322	123	143	443	73	152	133	155	158	195	180	205	111	175	145	150	266	244.999	180	341	174
PYGM	63	261	524	3	9	2	9	2	6	1	5	4	8	20.999	5	12	9	1	5.156	6	7	4	4	4	14	3	23	9	4	14	3	19	1	8	5	6	5	7.001	127	100	17.713	10	7	8	196.001	5	78.001	9	10
PAGE1	0	0	0	0	0	0	0	0	0	0	0	0	0	0	0	0	0	0	0	0	0	0	0	1	0	0	0	0	0	0	0	0	0	0	0	0	0	0	0	0	0	0	0	0	0	0	0	0	0
PITX1	3	5	0	1	6	1	26	4	14	0	3	2	10	2	9	6	5	0	3	4	2	8	1	4	5	3	8	5	0	6	9	5	6	3	0	1	0	1	12	9	16	13	6.942	2	12	13	6	1	9
TRPC7	0	0	1	0	5	0	0	0	0	3	2	5	3	1	4	2	0	0	2	2	0	1	0	0	2	3	5	0	0	1	0	0	0	0	3	0	1	1	0	1	10	4	0	2	2	0	1	0	1
MAST4	776	344.001	714	301.001	520.001	307.999	537	665	698	1677	2006	3276	920	2034	2438	1415	2015	673.002	730.001	940	1687	2751	944	1137	1511	2568	2655	2926.12	5708	2726	4133	2863	730.999	1496	923	2693	3133	3447	1180	1205	779	1928	4277	3934	1679	1971	575.999	4103	2877
ADGRF5	792	850.985	1235.99	25	85.946	16	1	2	5	11	2	3	15	6	7	20	0	9	35.165	10	8	4	6	59	1	0	3.679	0	17	3	0	8	1	0	0	0	1	0	5	3.086	10.382	7	1	9	18	18	2	15	0
SDK2	77	21	201	2	11	3	22	39	5	31	28	106	38	24	37	16	13	4	6	12	30	3	0	8	16	9	31	33	99	40	32	63	21	35	59	16	8	17	4	14	26	14	11	13	20	101	6	36	10
ADAM7	0	2	0	0	1	0	0	0	0	0	0	0	4	2	1	8	2	17	3	5	2	2	1	1	2	2	2	0	0	0	1	0	0	0	0	0	0	0	0	1	0	3	0	0	0	7	0	1	0
NUP133	1081	1986	1341	258	256.083	277	873	639	1056	544	1168	1853	447	1333	1470	825	1453	601	626	730	1037	920	384	653	806	1780	1907	1240	1218	655	876	878	342	418.999	409	448	614	673	1085	1052	750	893	861	1168	668	651	2188	1164	560
NUCKS1	11497.6	4137.65	7697.44	4591.19	5951.45	3816.83	5608.79	3143	3595.59	2396.32	3542.7	3041	1538	5075.89	1612.47	3315.7	3347.96	1644.74	1875.43	1864.69	3072.84	2883.87	7498.52	7401.59	2971.63	2348	4595.1	5264.81	7831.36	4434.48	6167.47	5331.62	1331.22	4143	2562.52	3980	4548.75	5243.58	2531.32	2355.94	1766.59	1864.31	3737.87	4140.81	2401	1717.16	3357	5407.47	3183.43
VPS35	6647	11343	7606.99	716	519	646.989	8468	3810	6220.71	2756	7371.99	6645	2469	9440	6115	4879.99	5911.99	2713	3369.99	3673.99	5113	4168	1118	2205	4974	9679	17151	10998	15874	11430	10747	12179.7	1772	4023	5753	4143	11240	7986	6754	11242	4166	4806.92	10460	12140.9	6627	4967	10676	12125	7569
DNAJA2	2899	3797	3369	1913	1269	1239	2377	2204	3198	3213	3292	5738	2687	3479	4563	3142	4576	2741	3382	2989	3831	3550	1168	2719	3606	4341	6673	4765	3618	2832	2980	3503	1562	1690	3323	1385	2491	2244	8411	6577	3401	2947	3914	4434	6960	4617	7480	4648	3129
BCL3	856	502	849.999	1318	1603	1913	432	358.999	510	544.999	633.999	556	279.001	596.001	414.999	376.001	450	370	417	544.999	417	519	1358	775.999	1356	312	321	754	1447	933.999	1207	909	283	977	834.461	1580	1411	1026	354	1248	413	466	973.001	302.001	493.001	595	453.001	985	873.001
KCNAB2	280.999	112.001	324.999	105	58	15	45.001	35	32.001	181	299.181	119.767	138	313.001	169.001	72.031	123.995	29	25.001	104.001	89	74.999	29	271	408	432	189.57	126.107	245.002	147.566	83.654	231.545	67.963	136.001	126.814	165.879	116.529	119.002	120	292.999	91.999	173	101	88.084	159.001	327	166.717	844.001	363
ABCC9	570.136	391.927	319.999	1310	1401.89	805.463	2	4	2	299.999	116	223.001	106.002	182	81	60.206	275.999	225	229	135	305.001	144.001	1905.28	1421.5	239	79.001	225.001	256	2612.88	201.001	180	756	163.001	612.893	123.001	384.999	270.001	666.999	491.346	375.001	224.058	311.001	181	1370	344.423	251.272	198	1780	316.107
GAL	8	0	13	0	1	0	1	7	30	386	4	0	802	3	1	42	2	777	2104	204	26	5	0	0	112	5	1	12	5	3	2	2	376	1	177	1	9	16	2108	2	76	2	0	1	20535	17415	525	1	10
CLEC2D	211.755	79.33	210.855	2.221	15.028	15.444	57.201	37.331	30.234	79.829	122.57	45.606	28.634	136.096	58.239	114.245	43.67	22.168	39.938	34.384	43.853	52.711	12.007	57.376	150.618	70.169	129.411	110.606	295.576	178.686	194.105	291.145	48.955	122.399	47.415	162.305	220.089	152.548	40.165	89.09	132.646	196.41	223.118	119.646	34.016	54.235	74.229	257.421	187.126
FUNDC1	1073	928	1022	127	123	141	2006	654	1101	379	470	645	367	871	845	686	431	316	392	373	411	512	252	386	420	666	1239	490	1032	694	948	602	177	810	576	1047	1118	1341	349	889	269	310	648	614	357	487	687	999	653
MAOB	69.046	6	58	6525	6335	7092	2248	1902	2442	8771	3448	1941	6613	1833	2982	2306	3086	4391	8253	6491	4944	9765	12206	15254	13506.6	9470	752	6584	4131	5958	9005	822	5663	4139	7271	3250	9182	5019	21603.7	4614	6150	5381	6236	4397	18320	11040	12422	5643	6275
RORA	746.447	516	423.001	2442.83	2906.07	1202	572.125	217.829	101.999	1149	399.555	210	318.898	445.169	93.001	407	251	423.298	433	357	360.939	209.016	1694.18	1981.65	1313	233	387.025	407.391	817.844	458.001	370	1177	467	347.999	386.997	373.024	339	397.809	1048	229	573.999	572	398.021	422.791	787.628	802.001	217	1290.65	465.999
DRD4	1	2	6	6	14	4	5	0	0	3	10	0	0	8	1	5	1	0	0	1	5	2	3	5	7	3	5	0	3	2	6	7	1	3	2	5	7	0	3	0	1	5	3	3	8	2	3	2	6
TGFBR3	425	218	248	502	566	514	1375	536	461	465	613.001	233	389	442	307	766	714	165	372	307	441.001	939	630	592	1170	428	620	727	537.001	348	562	759	155	387	268	783	601	762	335.999	465.001	308.999	254	835.001	646	433	392	512	498.999	642
PLA2G10	1	0	0	0	1	1	556.96	130	143	2	33	180	3.297	25	66	4	1	4	1	6	20	15.886	0	0	16	53	16	45	78	108	90.987	27	0	2	0	41	39	20	0	254	6	23	55	16	1	0	13	34	14
HES2	9	3	34	4	9	1	187	122	223.999	739	471	492	134	451.999	435.999	128.001	266.852	138	103	387	883.999	577	0	7	384.678	585	608.036	333.999	587	267	363	687	51	140	122.999	345	288	399.001	147	624	275	449.348	298	380	322.999	384	574.001	598	827
ATP1B3	7447.99	14806.9	12421	26	53	18	3640	1586	5109	2943	2755.99	7883.99	3226	3840.99	6402.99	2768	5002.99	3651	3804	4012	5662.98	4707	34	211	2390	4119	9894.99	10535	8211	6738	7257	5204	933	2926	3432	3704	7146	10188	6208.99	11134	2061	1867.99	7783	7894.99	6992	5581	12777	3912	4813
NEDD4	1201	956.001	780.001	611	574	518	286	279	285	1100	830.001	986.999	839	987	523	443.999	1112	608.001	1047	784.999	907.001	854.001	825.001	1464	1350	641.001	889	436.001	638	366.001	489	1085	849	736.001	1112	573.999	544	470	2160	764.002	1057	741.999	661	528.999	1847	1651	852	1136	591
PIGB	1066.49	1495.55	829.848	158.461	155.493	175.023	782.315	339.166	442.926	593.302	453.433	342.371	334.639	791.986	467.789	395.046	505.277	551.397	592.211	577.384	536.679	486.64	303.638	374.928	1009.9	972.635	1372.32	821.632	1790.49	1032.33	1259.41	935.965	340.999	1243.98	810.826	1456.43	1820.91	1779.43	1211.79	832.654	531.402	537.356	1199.31	1058.63	1267.91	918.399	708.473	1168.57	904.593
MAPK6	1348	2054.96	1210.99	542	489	462.996	1726	1280	1831.99	1652.98	2675.98	2672	1327.98	2935.99	2267.99	1913.87	2515.98	1848	2159	1993.97	2094	1713.99	1012	1378	2547.97	2733	2403.99	1674.99	1760	1007.99	1358.99	1316	1090	1194	1169.03	1470	1130	1179	5475.97	1901	2501.95	2247.96	1232	1409	4738.99	3662.98	3934.99	2280	1157.99
GNB5	821.646	2209.32	1697.4	245.275	371.847	466.422	780.057	1044.64	1296.48	806.487	1495.66	1667.54	707.249	1579.72	1314.03	1240.98	1196.55	713.326	904.863	859.925	1170.62	901.06	651.231	1197	1818.19	1983.04	3537.7	1953	2759.42	1686	1437.99	2309.11	574.795	1602.75	1178.09	1358.26	1465	1511	1829.94	2306.22	1192.88	1177.11	1872.99	2649.78	2200.84	1714.51	2102	2326.75	1579
RAB27A	627.056	552	633.26	969	906.08	1029	242	101	266.858	325.238	139.139	150.046	120.032	239.203	187.025	229.999	130.04	288.029	396	341.229	194	204.035	1099.01	1836	380.001	365	530.088	347.074	432.001	398.105	429.018	514.058	184.024	389	549.122	284	352.048	378.019	694.109	262.017	210.978	208.142	322.999	498.021	642.153	538.015	314.105	330.03	290
HDHD5	943	2311	2296	1227	1201	1554	451.999	1530	3166	3280	3019	2673	1365	3684	4692	2679	2144	1686	2152	2532	4069	3659	1152	3338	5458	3651	5751	6841	3652	5349	2427	3794	1288	1796	2840	1192	2562	2620	3967	5031	1717	2119	3737	4958	4201	3244	7943	5853	5044
UFD1	3608.6	4007	5120.99	1230	784.179	882	2672.43	1445	3333.99	3710.83	1785.81	2833.32	1667.34	2339.82	2552.99	1494	2224.84	2257.78	2491.98	2204.99	2578.15	2152	1368.8	3304	2923	2491.99	4460.97	4007.99	3521.99	3592	4375.98	2597.94	1262.93	2348	2721.56	1972.98	3519	4038.99	5155.98	4973	1231.1	1503	3408.81	2932	5237	4071.99	5897.99	1721.99	2164.66
LRP6	1364	319	942	657	808.999	828	607	463	594	694.999	465.001	466	600.001	528.999	271	615.001	472	356	439.001	537.001	591	745	1631	2017	718	266	540	744	1612	431.999	775	1025	446	536	588	376	489	602	958	834	439	436	584	697	1147	1124	847.999	1011	424
GUCY2C	1.064	1	2	2	3	5.058	18.886	6	5	47.614	8.09	158.897	20	7.065	583.637	10	13	85.679	18.364	66.049	10	12	3	4.086	31.184	225.354	4	3	0	1	6	3	12	0	4	0	0	1	167.678	1	3	2	8	0	151.764	132.379	10	0	2
SCT	1	0	0	0	0	0	2	0	0	0	0	0	0	0	0	0	0	0	0	0	0	0	0	0	0	0	0	0	0	0	0	0	0	0	0	0	0	0	0	0	0	0	0	0	0	0	0	0	1
PHRF1	264	112	246.001	74	100	75	67	83	201.999	1375	213	227	777	169	303	135	255	262	1120	516.001	214	284	209	513	1233	296	451	409	387	289	257	377	810	215	377	230	289	251	1387	529	796	567	330	374	1901	1025	1565	804	415
ELP1	728.001	1196	980.002	326.001	233.002	325.999	872.999	873	1377	2097	2874	3657	1133	2466	2313	1247	4108	1224	1716	1953	3505	2966	830.998	739.998	2468	2889	2813	2324	2552	1250	1746	1869	881.999	3269	862.002	1693	1490	1566	2446	2371	2482	2877	1918	1819	1807	1755	3405	2218	1538
NUCB2	13149.8	6044.74	9379.19	1172	951	1077	7283	2252	3628	3512.18	1278	1174.58	1863	2324	1249	2056	2098.74	1933.73	2799	2729.77	1809	2130.2	4870	4428	3068	1524	3692.76	3108	6099.75	3893	4323	4392.27	1380	5009.65	3040	5814	6091.94	6242.53	5139.8	3161	3395.6	2889	3788.94	3912.61	2880.02	1775.69	2545	2945	2439
PFN2	5625	8821	8457	583.001	357	320	3661	2350	3113	3008	2978	4719	2526	3189	2801	2504	3164	2554	2769	2357	2997	3421	1065	507	1544	4561	7404	3848	4015	2726	3704	3467	1490	2639	3586	2839	3840	3795	4826	3623	1093	1499	3462	3200	2850	2700	3195	1930	1586
PTPN3	93	259	108	847.999	861	1105	1642	1404	1587	1492	2306	1533	1009	2614	1561	1571	1746	1267	2140	1693	1589	1132	2079	3196	2314	2360	2853	1415	1999	1065	1267	1584	1719	2170	2358	1690	1340	1428	3231	1244	2058	1435	1441	1558	2613	2439	1562	1816	1334
SPTB	9	36.896	34.348	3	6	6	12.986	30.518	57.015	28.332	15.853	12	28.307	41.142	11.768	41.298	19	15	30.571	31.658	39.99	17	13.962	12.766	3.41	28.763	193.346	26	90.912	31.778	36.183	489.872	18.677	10.164	9.083	15	13	47.064	24.47	10.864	28.079	27.049	15.467	71.12	10.74	6.346	27	77.956	12
DAPP1	3	0	4	1	6	3.001	151	48	149	5	0	9.002	28	24	6	18	5	7	15.022	18	5	1	4	27	5	6	121	1	2	3	0	61	1	1	0	1	0	2.387	35	1	3	1	5	3	47	4	3	3	3
FGF10	3	1	1	0	3	0	0	0	0	8	0	1	11	0	0	15	5	2	11	12	8	5	0	3.178	4	2	4	1	2	5	1	1	6	1	0	4	1	7	6	0	6	12	1	0	1	5	4	3	3
SLC44A1	2605	534	1210.24	1453	1187	1591	5899.22	1865	2038	3285	1164	657.307	1423	1265.08	491.115	957.179	952	1291	3025.53	1687	968.001	1428	4388	4760	3942	1198	1319	1630	2492	1462	2749	1834	1731	2493	1792	2201.63	2825.53	2358	4096	1322	2846	1282	1398	1109	5097	2440	3071	2057	1350
TMEM260	701.002	330	708.999	132.663	161.214	190.963	316	146.001	276.001	538	222	287.734	301.001	217	185.999	195	215	227	322.999	271.999	239.999	486	477	454.001	611	442.999	310	270.001	402	264	393	266	249	180	345	198	384	296	681.999	303	353	402.251	289	349.999	589	468	454	507	265.001
SMG6	782.468	1394.2	1187.55	85.197	118.454	140.178	89.147	225.812	369.261	361.271	535.03	807.779	306.502	543.941	451.545	436.425	507.393	221.015	260.639	317.375	466.869	524.415	263.819	337.079	559.294	554.989	924.494	484.904	340.994	320.945	260.675	421.892	166.048	185.703	292.31	112.008	210.339	267.872	444.075	454.878	293.161	277.553	368.544	486.975	521.525	501.993	456.838	791.224	519.733
EXOC5	2214	2749.95	1556.88	468	429	413.01	978.001	1199	1565.99	1166.97	1503.98	2104.97	1052	2392	1095	1533.99	1556.99	1209.98	1231	1250.98	1581.99	1210.95	808	1124	1670	1913	2233	1297	1662	747.001	1086	1084	781	628.001	829.968	689	779.995	1108.98	2994	1347	1104	1163	946.001	1309.99	2447.99	2532	2542	1316	837
CLTCL1	647.967	230	489	59.999	78	55	30	72	42	116.001	182.001	267	93.001	222.299	169.94	138	227.969	137.996	122	133	276	161.999	167.999	144	177	202	261.925	267	730.999	254.84	247	437.988	151.999	180.999	192	166.999	247	383.994	461	304	286.001	335.527	294.874	521.953	476.002	532.468	222.999	733.942	271
FGF22	13	7	10	1	1	0	0	1	4	12	10	6	18	5	8	13	9	8	19	7	16	2	3	3	11	4	10.002	10	7	6	11	12	24	6	3	2	4	2	50	3.703	16	4	5	10	31	22	7	4.041	6
FSTL3	3056	6372	4096	53	154	56	93.999	373	900.999	574.001	376	296	158	1576	270.001	174.001	251.999	399.999	127	521	1025	257	100.999	154	439	356.001	3739	819	4064	1045	339	6564	141.999	224	301.001	468	419	1676	210	1365	350	594.001	363	2898	234	253	541	9214	952
DGCR2	1335	967.001	1424	599	572	509	793	1335	2440	3077	3723	10444	2199	3860	7238	3973	7508	2593	2667	3817	4868	4934	967	1264	2430	3191	4343	3080	1996	1859	2063	1960	999	1457	1440	1134	1347	1786	3672	2600	1322	981	2215	2315	3226	2776	4099	4878	2327
RNF126	787	806	990	641	490.99	532.999	360	334.999	1125	1675	724.999	820	914.001	704	878.998	527.993	405.998	726.001	1771.98	1271	992	968.001	554.999	855	2781	1277	1573	1682	1773	1328	1085	1761	750.999	554	1083	807	1038	1155	2265	1386	915	735	1107	1484	2369	1583	3755	2293	1179
MNT	592	459	560	121	88	107	249	180	246	243	255	216	93	254.999	149	224	157	103.926	177.777	175	221	189	109	211	399	269	510.257	332	390	291	261	409	181	192	413	228	222	193	377	316	167	155.116	327	326	387	269	194	311	289
ZXDC	416	135.999	397	361	249	299.001	236.001	139	239	474	354.999	254	221	299	181	218.999	278	227.999	275	271.999	326	452.001	597	757	742	255	437	494	587.999	383	701	496	361	617.001	653.001	459	650	664	701	460	277	280	509	348	884.001	666	619	548.001	409.999
JMJD6	1535	2240	2572	590	393	450	1618	664.001	1065	1118	1425	1235	547.001	1779	1189	817	1263	640	656	832	988	1039	382.027	599	1260	1734	3614	1947.17	3756	2409	1695	5449	529	1690	1517	2739	2526	2565.97	2887.93	2968	1679	1955	2018	2181	2892	1410	2841	3516	2293.97
POLB	457.999	467.999	677	457	333.999	296.999	1267	427.999	674	733.001	496.999	1339	587.003	689	912	555.001	641	726	800	617.001	705	620	694	653	412	645.001	1365	1053	1367	845	923	910.001	337.001	753.001	894.999	896.001	994	1029	1218	1296	322	462	853	1074.01	1133	875.999	1223	962	640
ST6GALNAC1	0	3	2	0	5	1	1037	549.999	1786	7	27	424.001	6	26	149.999	14	2	21	52.999	97.001	8	10	0	0	69	103	431	29	321.999	60	91	7225	0	2	1	13	72	83.001	1	1	3	3	5	770	1	1	7	1410	28
WIPI1	4503.06	4825.44	5713.52	63.336	145.239	173.758	1535.41	1518.05	1896.83	828.096	393.677	1110.89	942.968	1017.62	855.994	581.663	406.764	1371.06	1363.29	1441.77	763.052	809.362	597.763	951.48	1059.59	2262.46	8890.36	537.031	1106.8	617.692	987.977	2860.92	694.441	721.511	1391.41	899.4	1001.96	1546.34	3114.96	1119.11	510.984	442.858	596.992	1411.89	2767.98	2147.47	1115.45	775.625	508.795
FRMPD1	1	3	4	5	18	10	5	4	24	39	36	19	7	21	19	19	29	4	10	7	10	22	32	77	28	41	21	4	9	33	46	2	0	14	0	2	23	14	2	0	11	11	19	10	2	7	1	16	13
GBA2	963.292	965.756	1281.62	425.14	387.806	549.514	1426.71	1493	2261.33	2100.93	1939.95	2978.98	845.519	1925.67	3177.3	1379	2452.5	919.198	1300.42	1607.34	1843.81	2180.42	1212.72	1395.03	3283.46	3661.08	4195.8	2961.99	2810.82	2610.06	2711.86	3596.56	1094.3	1728.22	2063.83	1714.11	2406.52	2314.93	2866.87	2957.38	1931.53	1987.23	3090.59	3746.29	2623.37	2499.09	2743.41	3013.94	2236.92
NDST1	1447	1944.94	1942	342	317	650	117	311.999	396	811.001	577	996	526.999	471.001	754	465	674	1056	986	1162	914	640.999	611	977	1431	1062	1853.71	796	980.001	581	592	868.001	643.643	696	1139	440	537	1002	1911	761	583	409	645	1441	2213	1481	742	1141	719
ASNS	8222.33	3216.5	3529.72	11.112	17.809	0	7244.76	525.717	879.372	574.064	740.299	1011.51	455.106	1858.73	652.646	876.414	717.795	504.427	700.91	564.39	530.554	747.344	12.941	110.48	493.966	1178.1	3618.52	1034.58	2562.67	1260.95	1284.34	2030.25	446.626	817.776	1785.61	1019.48	1301.25	1614.72	1872.08	1671.09	531.581	409.891	1059.96	1389.62	683.072	999.297	1788.19	1191.21	848.71
AP3M2	1028	1310	1203	24	18	33	1222	734	662.999	408	1106	878.999	399	1027	705	874.001	823	371	535	482	651	680.999	90	170.999	528	1321	2199	1286	2096	982.001	1222	1529	321.993	268	630.999	557	789.999	799.001	864	1238	939	1060	1237	1751	804	1335	1140	1523	832
CNGB1	3	0	0	1	4	2	0	2	4	5	0	3	4	9.043	4	16	3	0	8	5	8	1	0	1	2	1	29	0	19	3	3	76	4	1	0	2	2	23	4	1	11	9	1	21	1	2	0	15	4
ST6GALNAC2	1	26.572	4.132	2.057	3.146	3.084	59.958	96.191	57.708	28.592	40.015	21.243	8.372	245.977	84.457	140.097	20.462	33.299	49.005	56.418	41.74	14.284	6.793	14.116	19.607	42.116	162.228	28.029	95.585	45.574	29.82	1028.86	9	22.846	13.188	27.791	33.799	32.423	44.876	30.441	16.873	21.747	40.067	47.25	37.209	27.253	30.007	83.143	45.416
CHAT	2	0	3	0	2	3	1	0	0	0	1	0	7	9	3	2	1	0	6	6	2	0	1	1	3	1	5	0	1	2	1	0	1	2	0	2	1	0	4	0	6	4	5	0	1	0	2	1	2
PABPC1	46091.2	31268.2	42457.3	7604.94	7802.91	6969.9	39143.2	15452	18056.8	13460.9	32215.2	42840.7	11524.9	36955.8	28404.9	18248.3	28525.7	8174.84	12009.8	14667.9	22200.8	26392.5	13660.7	26044.5	21221.9	36143	64235.9	49979.9	70106.1	42800.9	61713.8	50200.9	8002.98	29852	27727.9	37111.9	52379.4	46880.5	25623.8	41475.9	17100.9	15421.9	48683.9	53144.7	23611.9	15082.9	35936.9	48385.3	37895.9
TESK2	98	274.67	109	96.166	98.899	207.332	107.257	109	160	182	445.059	646.892	87	236	625.088	203.108	484	145.235	177.021	222	300.075	424.876	252.323	249	313	541	822.331	416.028	369.966	416	442	528.628	105	330	238.001	410	523.073	443	307	309	232	237.032	632.055	588.007	372	155.158	365.935	579.001	352.534
CFAP20	2111	2173	2451	1113	587	567.001	4394	891	1698	1220	1652	2673	1257	2101	2011	1502	1696	1271	1763	1441	1449	1556	954.001	1339	1705	2066	5814	3092	4102	3146	4066	3849	722.999	3420	2173	4038	4572	4611	3702	3246	1102	1117	3297	3132	3522	2144	3697	2292	2227
CSNK2A2	1964.5	872.729	1661.61	435.16	413.417	408.204	1759.43	585.385	761.952	539.316	867.059	756.626	417.723	1046.19	322.954	562.701	611.399	385.206	389.918	429.239	525.477	680.479	819.178	1282.49	840.134	748.321	1345.44	1096.58	2407.03	1095.53	2385.65	1691.17	248.776	1582.66	702.417	2214.69	2212.29	2092.16	1019.45	1284.61	343.459	211.989	1146.38	998.966	1113.55	787.057	918.254	1423.01	902.475
PTPN21	1149.99	761.999	1300	185	189	195	181	129	159	254.97	225.001	165	96	308	119.999	236	123	87.001	115	87	197.999	206	412	349.001	340.999	202	433	202	560	219.999	311.004	453.001	87	216	158.001	326	307.999	327	283	456	138.79	212	237.878	266.999	224	151	191	404	218.685
EIF2B3	2004	2297	3256	988	558.001	536.001	3356	955	1663	1183	1409	1626	815	1533	1647	595	1419	972.999	1255	1183	1260	1385	726	1443	1429	1919	3517.97	2913	4273	2741	3823	2289	752	2332	2088	2996	3969	4454	2944.63	3649	1093	1158.96	2910	2787	2474.48	1782	3378	1346	1720
CAMK2A	8	9	43.225	4	25	0	0	4	0	12	4	3	15	9.999	11.006	29	6	13	15	9	14	3	14	1	11	2	13	5	2	10	3	6	9	0	1	4	0	6	6	1	33	21	6	1	8	7	7	4	8
TCOF1	1302	1143	1450	288	289.999	295	544.001	331.001	1415	485	1313	1990	367	1506	1889	587.011	1881	617.055	752.999	1094	1852	1195	503	747	645	1565	2821	3120	1718	1804	2205	1333	363.002	755.999	744.999	763.999	1221	1390	1203	2639	776	891.999	1471	1861	987	555.998	4951	1009	1036
CDC42	3371.02	4132.98	5156.72	1022.75	522.302	400.47	2165.11	2018	2306.49	2049.57	1482.96	2490.03	1543.77	1508.39	2119.27	2208.2	1584.71	1251.53	1649.96	1525.81	1622.41	1923.12	771.488	1125.71	2242.34	1321.9	2234.8	1944.49	2518.72	2091.22	4150.97	1930.49	582.339	1937.96	1058.9	2857.84	1776.98	2308.58	2818.19	2737.45	807.045	733.303	2641.93	2233.75	4744.72	2884.31	3460.81	3602.86	3382.9
OSBPL3	468	552	625.001	3	14	2	1167	1261	1540	1240	1032	2409	670	2531	2048	1657	1335	681.999	658.999	868	1290	1723	12	47	1495	2373	4508	1934	1670	1169	1556	1802	252.999	448.001	322.999	1229	1221	1166	783.999	1354	501.001	1013	1443	1825	848.999	1517	2089	1251	1162
EPHA8	2	0	2	0	2	0	0	0	2	2	0	2	0	4	5	9	4	2	1	2	2	2	0	9	2	3	7	1	1	10	9	1	7	0	0	5	1	1	4	1	6	7	3	1	7	0	0	5	6
SLC12A3	1	3	0	1	1	1	0	1	1	0	1	1	3	1	1	4	4	0	1	4	3	1	0	3	1	0	6	5	46	43	5	23	1	0	0	2	5	31	3	0	9	4	0	41	6	3	0	9	5
RAD18	504	627.001	703	84	64	67	806	393	795	399.999	506.002	494	161	723.001	499	399.999	591	313.001	304.999	362	603.999	591.001	165.999	258	780.999	964	1025	1135	929.001	820.002	914	624	85.001	179.999	358	347.999	745	621	421	734	306	577	1118	971	433.001	450.999	1381	805.999	517
ATP2B1	4684.76	3450.2	4544.02	1250	1001	998	4096.57	2014	3539.99	1285.01	2214.76	2625.74	1447.53	1730.06	2580.68	1438.92	1793.48	1032.99	1453.54	1711.41	1570.02	1895	1142	1443	1877.03	2229.9	2629.57	3330.84	3622.14	2369.47	3384.37	2207.71	844.101	2399	1792.97	2181.21	2474.37	2379.83	3770.12	3812.27	1720.22	1504.97	2709.99	2294	4492.74	3331.1	2912.07	2420.76	1891
TRPM5	2	1	3	1	1	0	0	4	5	2	4	2	2	13	3	4	2.317	0	1	3	4	4	0	3	0	4	3	2	1	4	1	1	5	1	0	0	1	0	3	0	5	3	3	3	5	2	4	2	3
NCK2	2395	866.001	2178	92	112	117	1357	1101	1459	890.998	898.971	992.999	882.964	1679.99	772	1969	590.994	362	536.013	465	377	843.989	42	322	1286.97	1454	2897.99	853	3350.99	1521	2536	4255.99	120	874	354	1992	2199	3142	455	596.994	306	300	1036	2186	364.999	508.988	452	1911	970.996
MAP4K4	6899	2748	7002	548.001	586.999	519.999	1071	705	1107	1956	1613	1503	1310	1632	811.999	1209	1031	735	1264	1109	1734	1390	1411	1743	1960	1169	2134	2590	5186	2221	4453	1797	695.001	2177	1351	1760	2680	3244	2312	2655	1233	1196	2281	2648	3450	3020	2056	2365	1833
MGAT4A	2	6	12	249	192.999	229	829	521	434.999	379.999	308.999	855	580.999	884	755	563	257	1158	986	657.999	369	320	383	655	426	793.001	2424	325.001	510.999	397	533.916	1284.09	317	248	326	162	248	434.999	1653	312	200	149.999	290	719	1396	1095	677	336	202
RPL31	54721.6	48576.9	59837.7	19192.9	16297.6	16395.3	43534.2	20770.9	32830.8	28159.6	83105.9	83992.1	24039.2	91144.8	65099	42145.6	61695.5	18733	24538.9	36324.8	49986.5	51405.8	17333.9	40466.5	33506.6	43190.4	97327.6	72616.4	140403	117876	93911.2	121756	15865.9	93777.7	41164.6	145340	128982	91990.5	27036.8	92685.7	68801	100307	99546.9	84621.9	30023.5	22058.8	47702.6	175396	102682
WDR1	12507	33434	32321	1665	1720	2070	4264	4649	9082	7485	10062	13406	4659	12387	11227	7142	11384	7593	7671	8608	12020	8853	1707	3670	9969	14889	22724	14723	14066	12124	11028	9649	2370	3938	6487	6698	10643	13190	13110	15945	5026	4865	11742	12235	17942	12375	17773	10186	9613
SNX13	1117	1670	806.999	241.999	242	258.999	1017	710.999	943	613	984	1254	545	1421	915.999	907.001	1074	740.999	743.999	810	879	867.999	504	595.001	951.999	1502	1922	920	1397	722	888.001	1172	463	855	602.999	1067	956	1121	1529	995	849.999	851	974.001	1260	1374	1377	1192	1159	677.999
MS4A12	0	1	0	0	0	0	0	0	0	1	0	0	4	0	2	0	0	1	0	0	0	1	0	0	0	0	1	0	1	0	0	1	0	0	0	1	0	0	0	0	0	0	0	0	0	1	0	0	0
ARHGAP10	1699	1637	1730	506.001	646.999	389.999	140	171	381	310	451	750	161	553	433	220	408.999	188	250	264	303.001	368	521	718.001	510	578	1104	880	533.999	625	531	676.999	179.001	308	372	231.001	372	396.999	348	638	190.001	258.001	693.999	672.999	537.001	594	806	375.999	400.999
RPS6KA2	9244	3296	5452	208	192	204	1456	569	495	703	428	551	364	682	296	386	329	342	710	377	289	440	508	563	800	636	1980	468	1255	517	614	935	214	444	567	456	533	890.005	740	483	320	206	672	1374	1078	948	677	629	367
ING3	855.999	821	746	126.001	111	147.999	759	153	359.999	224	341	398	170	331	296.001	315.001	351.001	184.001	169	259	355.001	279	209	270.999	446	402.001	778	535	748.001	518	757	488	135	601	385.001	338	718	633	337.001	706	273	314.999	685	687	385.001	290	407.001	297	451
VASH1	240.36	139.205	375.705	8.989	30.461	13.621	59.987	72.33	72.925	24.153	78.208	39.2	69.031	69.752	82.473	89.86	84.926	31.8	47.584	72.24	87.312	65.647	51.353	60.887	53.404	50.52	114.939	88.082	128.593	69.857	60.124	84.261	69.039	54.195	78.286	49.346	70.105	121.576	57.443	104.316	109.454	78.552	73.39	117.789	51.61	64.993	52.65	92.666	102.812
LMCD1	6185	24303	12038.1	36	51	131.001	188	424.001	370	306	1706	1046	330	2178	1787	942.001	1597	252.001	287.999	362	1459	1280	61	210	1720	1318	2962	1840	4486	3184	1851	3356	142.002	758.001	369	3079	2482	3245	237	2081	747	2249	3344	3523	332.999	327.999	1363	4114	2677
BUD23	3524.9	3997.84	4940	2152	1670.98	2238	5769.98	3280	5054	3287.84	3446	3748	2954.96	4080	3211.7	2160	3435	2918	3077.84	2685	2992.95	3496	2282	5122	3852.99	4227	7275	5634	8287.8	5453	6948.99	4586	1891	3999	5147.95	4384	7444.99	6996	8280.92	6914.96	1821.87	2324.96	6719.95	4726.98	8500	5083.96	6844	3103.98	4379.95
SEL1L	5382	3315	2767	2204	1949	1778	1943	1631	1497	2921	2274	2731	3153	3191	1204	2024	2808	2618	2926	2692	2881	2106	5548	6086	2501	2242	3145	1788	2714	1559	1927	2438	1934	1970	2927	1754	1708	2174	6537	2242	1746	1217	1989	2159	5781	4074	1794	2820	1562
TRIP13	340	334	429	5	4	1	335	134	961	36	301.999	203	56	580	410	176	229	425	347	494.001	814	423	6	94	98	662.999	1168	1835	1510	1912	1501	1031	32	54	54	316	1658	1365	145	907	45	391	643	1308	85	111	2966	794	782.999
ATP6AP1	5118	8169	8820	1155	862	779.001	1647	3897	4981	6208	8979	17134	7614	9450	12832	8487	9202	7136	8942	7871.35	7899	8822.09	1530	2361	8301	12204	18989	8083	7974	5400	5454	7929	4635	3296	6061	2539	4253	5011	18185	6938	7894	8105	7316	10312	21270	15137	12548	12002	7866
TCF3	1381	431.001	1181	193.001	164.001	169.001	526	616.001	1112	763.999	934.001	623.999	566.002	1049	472	1177	617	418.997	723	712.001	880	768.999	239	450	878.999	785.001	1818	1578	2257	1422	1591	1665	357.001	690.999	752	981.999	1415	2038	862	1482	611	585	1177	1489	990	956	1420	1709	1163
TRIB2	3198	2083	2508	106	123	72	736	342	365.999	264.001	275.001	1032	642	536.999	572	598.001	349	313.001	525	255	391	338	305	272	440.001	514.999	1175	347	472.001	227.001	334.999	338	484.999	326.999	310	283.001	391.999	492	512	267.001	226	228.001	563.999	638	621	1422	253	364	373
DAZAP1	857.001	392.001	1106	556	730	401	411.001	326	789.998	762	441.001	366.999	417	477	306.001	405.001	419.001	337.999	577	489	570	616	939	1193	642.002	460	797.999	986	994	722	1032	619	504	422	652	615.001	685.001	832	829.999	699.001	416.999	382.999	666.001	600.001	1090	807	1119	756	624.001
MBD3	1739	2487.81	3507	1258	1844	1632	418	865	2163	1797	2041	2602.44	1176.98	2327	2288.9	1763.16	1074	1191	1772	1705	2495.83	1985.64	2162	4040	2435.5	2538	4650.65	5421	2282	2978	2101	3219.5	1247.99	1387.83	2779.98	825	1422.9	1942.87	3578.33	3608.81	1369	1627	2771	4289.15	3697.98	2577.11	4718.94	3039	3085.32
PRLH	0	0	0	1	0	0	0	0	0	0	0	0	0	0	0	0	0	0	0	0	0	0	0	0	0	0	0	0	0	0	0	0	0	0	0	0	0	0	0	0	0	0	0	0	0	0	0	0	0
HLTF	1509.05	913.137	1106.6	376.953	268.262	254.294	1242.72	992.969	983.6	458.331	1677.92	2101.22	629.754	2152.7	841.295	913.152	1713.51	808.587	908.024	971.617	1405.04	1108.86	400.79	772.037	647.263	1356.79	2219.03	1313.19	2458.2	988.066	1111.28	1501.57	521.283	856.048	663.727	884.597	895.464	1164.07	1554.96	1497.59	1372.55	1631.19	1296.57	1672.66	1174.73	869.533	1530.56	2012.78	1085
FAM50A	2467	1367	3459	363	546.999	206.999	1116	428.001	786.001	2717	676	2596	1662	1014	2052	1518	1323	1857	2081	1646	2142	2052	656	1143	1161	777.001	2150	1198	2621	1172	2015	2113	1093	1304	1115	2069	1832	2013	2802	1701	1752	2020	1156	1189	4731	4229	2217	2642	1334
FAM3A	1134	1977	2076	1346	1078	1197	560.998	974	1391	2437	2283	2836	1915	2030	2215	1475.62	2141	1931	2243.95	2315.9	2435	2232	1819	2157	2641	2327	2991	2512	1755	1719	1334	1904	1947	1771	3426	1225	1737	1587	4208.99	1996	1976	2183	2578	1909	4699	3236.96	2249	2268	2638
CPSF1	1107	1301	2107	809.001	619	701	586	458	1391	1818	2231	3385	825	1808	2896	1307	3246	1265	1505	2131.99	2970	2559	1109	1357	1348	2183	3466	2807	2271	1771	2172	2248	753.999	1045	1337	1095	1381	1812	1901	2054	1028	1072	1821	2269.99	1652	1476	3052	2516	1737
MYO3B	11	2	3	1	23	10	4	5	9	26	16	23	3	12	6	8	10	7	0	13	7	5	5	27	126.001	26	31	9	5	9	7	44	5	4	2	7	3	9	3	6	6	12	9	16	12	15	3	6	11
CYBRD1	8999	14270	10030	18.999	169	295	408.999	280	659.999	245	290	448	103	625	1417	291	695	544.001	692.999	414.001	503	454	108	501.999	544.001	488.001	1228	558	1092	438	407.001	1550	363	325	566.999	539	571.999	809	250	489.999	321.999	290.001	323.999	601	885	1011	1061	1784	650
CDH19	64.001	30	251	2	41	2	0	0	0	4	3	6	4	2	1	6	2	4	2	4	2	9	1	6	2	0	7	1	1	1	4	1	3	0	0	0	1	2	0	0	3	9	10	11	1	7	4	1	2
PDCD2	1408.99	902.996	1461	453.001	437.999	326	1116	517.999	1029	1255	610	1186	1189	807	1073	698	936.994	760.999	1778	937.999	1014	1009	582	914.001	1553	743.001	1475	1385	1099	990.999	1561	737	647	573.999	843	702	868.998	1021	1444	1547	608.999	497	984.999	851.998	1925	1554	3584	964.001	815
SLC6A15	5	1	6	6.206	17	3	0	1	2	23.001	5	16.001	33.001	16	15	33.999	27	12	23.044	17	12	5	5	12	4	9	11	21	3	19.999	18	6	1	5	0	33	23	9	13	1	28.999	23	13	10	21	20	5	9	15
RDH11	5716	6248.94	5079	3428	2029	2611	20803	10783	12744.5	9768.86	13503.9	12096	6292.78	14184.8	12928.6	7618.95	14023.9	11926.9	11749.9	11615	11856.7	11173.9	4558	8048	15812	21377	25049.3	18695.8	26058.4	20226.9	22761.3	20459.7	6512.87	18303	20686	16348.9	24629.4	24261	31996.9	22099.8	8879.86	10213.9	25186.6	17903.8	30727	19617.8	17759.9	14787.4	16736
PRKACA	1625	562.99	1574	998	1117	933	269	382	518	971	656.001	596	715.001	630.999	372	512	665	477	813	655.001	678.001	733.999	1517	2214	861	416	647.999	815.999	720	594	721.001	631	628	480.999	1046	420	543.001	547.001	1618	758	515	330	822	571	2336.02	1448	799	784	734.999
ADGRL1	536.008	140	295.018	4	11	2	298.991	207	116	152	50.001	151.253	81	86.015	141	60	64	30	48	44.592	42	102	5	20.974	163	115.01	71.002	94	128	90	120	137	17	117	77.96	126.013	139	106	27.003	51	55	54.464	165.011	103.001	28	34.019	20	73	93.619
SPP2	1	0	0	17360	14312	18581	0	52	2	4942	4864	623	294	692	1067	53	3743	721	501	655.999	875.999	3554	15849	15043	7730	6298	27	1379	829	4585	7460	181	772.001	6263	760	5012	6422	1958	945	655.001	2588	1138	4457	380.001	1196	705	125	1513	3352
ACTN1	30005.4	60939.2	45258	1225.03	1296.14	1375.77	2841.7	3864	6745.03	10240	11607.7	14483.3	7262.08	15824.8	15803.1	10372.9	7704.38	8166.42	10448	11245.8	18112.5	14875.8	2931.05	4882.04	16852.4	17664.4	31767.1	17723.5	22962.6	13603	10022.6	19689.6	4182.04	4352	8199	7719.84	10044.6	16893.8	13031	17175.1	9985.04	11709.2	14930.4	28157.8	14384.5	17283.9	12802.6	24509	15343.9
ZFYVE26	413.405	334.002	546	41	55.02	78	190.339	116	214.599	312.564	313.742	563.973	177.073	391.515	344.884	272.656	548.313	248.645	225.114	341.468	442.682	363.809	191.085	273.118	366.1	414.72	570.51	458.117	545.111	399.612	432.281	435.05	224.026	393.88	364.933	323.254	409.976	469.787	540.982	496.374	318.336	318.265	488.504	416.243	588.669	533.198	383.073	641.047	538.395
RPS6KA6	70	26	71	3	15	12	210	119	98	73	45	34	65	106	9	90	50	38	46	52	51	65	46	78	47	46	139	51	260	72	129	229	20	78	30	90	114	93	33	75	54	76	73	81	65	55	38	182	95
EPN2	1248.3	1402.67	1606.47	246.131	258.689	135.41	225.913	450.424	389.054	374.69	836.257	529.895	358.403	1144.29	441.442	1276.23	524.45	259.561	334.586	359.481	454.669	349.448	211.543	380.083	541.844	611.849	1260.66	577.642	803.435	621.731	377.327	1008.64	403.922	331.228	515.345	405.286	452.523	548.397	798.157	594.27	586.188	594.862	609.439	819.781	662.475	587.678	470.588	1124.78	707.296
PTPN18	778.001	446.001	1004	457	567	440	802.999	663.001	972.999	620.999	360	322	266.001	690.001	536.999	723	309.001	399.999	750	461	433	531.999	1151	1537	803	573.998	810.999	735	742	727	1073	586.001	440.999	511.001	549	430.001	655.999	657.999	692.998	540.001	286.001	294.999	678	408.001	786	691.999	785.999	396	568
LIMS2	3919	8634	7618	597.999	677	509	3	3	9	74.999	39	69	91	42	33.001	22	53	313	152	145	186	30	1095	777	30.001	16.001	117	55	354	42	21	317	87	41	27.001	32	37	205	327	175	72.001	36.001	32.999	372.001	386.999	156.001	144.001	389.999	44
ASIC4	7	2	8	5	7	0	2	1	1	3	11	5	9	6	8	15	5	6	6	11	6	4	2	6	6	4	17	8	13	13	2	42	5	9	1	5	4	2	39	3	18	45	7	3	21	4	4	40	14
SPEG	451.001	680	503	5	17	5	16	182.001	99.001	12	41.001	11	179.669	233	17	170	30	39	17	33	37.001	17.999	2	12	9	39	427.002	17	46	38.162	11	121.999	7	11	2	33.999	29	21	14.001	18	41	62.001	18	61.999	18	16	3	149	36
LNX1	54.557	29.119	49.55	152.937	102.216	126.828	580.312	334.826	253.07	271.917	750.949	333.533	227.431	493.817	202.123	516.204	361.351	117.611	241.321	224.005	304.671	234.001	171.533	403.597	588.814	470.281	334.601	211.683	211.587	309.855	283.029	218.85	139.283	204.651	336.239	234.437	374.755	260.256	220.987	145.281	421.167	377.93	441.383	274.344	217.5	214.617	74.399	309.356	362.911
ALDH3A2	969.997	5592	2029	5165.97	4535	4562	9838	7836	15865	15081	15968	36023	16785	12042	24097	7562.89	29483	17161	19986	13672	18572	25206	7837	13919	15522	31319	13038	26791	16432	11565	15493	5608	14324	12997	24553	7807	10229	8843	44615	41090	14634	12597	18586	10496	47120	35656	39972	13910	11232
TFRC	2369	4356	3885.05	867.999	1258	364.999	5035	4994	3428.09	630	3661.03	1451	2309.09	4053.24	772.999	3820	1915	2196	1956	2951.01	3483.01	564.007	2277	5029	2334.11	2083	6265	1397	2737.12	1228.02	1059.05	2289	2359	867.002	3130	1487	1770	2276.05	6699	2449	4265.3	3467	1781	2731	7187	4834	4764	3109.14	1650
SREBF1	620.758	119.358	391.075	429.958	675.345	270.409	1068.23	468.002	669.016	8406.72	649.91	666.879	3016.01	578.001	744.516	630.739	822.3	2554.84	9608.11	5116.95	1236.93	1661.78	5371.97	3601.37	6952.69	1316	1144.26	1068.86	1144.26	914.625	1274.76	924.841	5926.91	1195.32	3048.18	700.164	1049.53	1041.24	6504.85	795.263	2591.01	1737.37	1152.24	849.308	7168	6635.33	1682.29	1984	1377.88
TRPC5	1	0	4	20	37	30	2	1	3	78	31	4	12	9	35	27	48	15	21	31	34	24	36	104	129	11	10	14	20	10	6	3	24	39	31	9	13	4	26	11	22	16	17	3	51	60	18	53	47
AFF4	2268	1230	2051	2212	2036	1472	882.001	760.001	982	2139	1309	2244	984	1362	1285	1418	1706	1617	1242	1501	1468	1768	2948	2275	1884	1503	2420	1150	1871	1003	1444	1862	1019	1699	1290	1487	1575	1494	3325	1808	1370	1783	1759	1729	3390	2691	1754	3279	1731
UBE2D1	1478	554	1120	166	145	147.001	702	403.001	658	738	319	451.999	815	460.001	1109	503	179	968	941	960	1112	1384	257	501.001	824	1183	516.999	753	1044	695.001	903	558	335	419	642	522	1216	365	2641	2447	716	797	407	883	1805	1126	2796	1362	772
PALS1	991.999	1085.81	1478.5	526.999	320.741	246	1082	721.999	906.001	910	818	1025	545.398	1273.57	486.001	830.475	793.001	583.027	633.004	612.66	747.605	804.636	638.7	690	859.934	835.999	1439	951.999	1273	557	1040	1168	341.161	464	490	438.999	602.999	693.001	1012	1050	499.001	585.481	627.952	703.999	1504.16	1095.8	1231	1341	553.792
RHOBTB1	2110	1260	2623	63	112	14	1356	907.999	1074	442	416	298	1088	474	348	502.999	293	90	385	121	429	241	100	105	616.999	280	545	565	1542	223	317	1026	364.999	788	497.001	660	440	872.001	392	678	535	431	251	405	270	1065	777	2415	335
SMC1A	1801	1842	1835	917	849.999	999.999	1041	1573	4852	1814	2298	2548	1171	4170	2293	2200	3842	1808	2368	2766	3370	2989	1189	2309	1947	3195	5321	3487	2238	2074	1915	2280	906	1033	1517	773.001	1712	2238	2137	2629	841.999	1052	1892	2650	3196	2092	6246	1940	1866
HSD17B10	6203	6570	10085	10612	7932	7720	4423	1927	5471	6809.93	4842	5916	4547	4104	5368	2484	6054	6122.9	8807.39	6091	6091	5393	11218	16059	5434	5324	9235	10079	9836	9919	10639	5594	3081	5607	6120	4262	8501	9807	15353	7404	2960	2680.55	10031	9330.83	15282	8560	10452	3936	5586
MARK2	297	201.999	357.999	128.999	148.001	93	185	298	568	638.001	264	259	414.999	276.001	224	373	212.999	212	479.999	363	287.999	353	204	288	947	387	579	469.999	531.999	468	508.001	598	389	346	421	289.001	510.001	555	825.001	568	334.999	201.001	525.001	451.001	1098	608.001	634	413	420
HMMR	253	149	141	22	4	4	575	193	1151	51	315	249	54	875	320.001	395	433	322.001	301	371	738.001	308.999	19	284	19	417	1520	1670	1012	1117	1020	776	27	24	13	152	574.999	588	163	592	39.001	465	750	1264	182	76	2619	591.999	450
CHFR	1119	1728.04	1586.08	132.999	166.999	188.637	262	616.999	1036.41	1018.01	885.005	1488.05	743.001	1255.37	1232	800.67	1019	850.999	1058	1103	1179.05	805.998	294.999	390	1193.27	1782	2871.1	1542	1092	1009.07	724.999	1242	725.464	492	1316	351.002	515	678.998	2301.09	1961.19	633.001	600	1055	1396	2170.45	2481.45	1508	995.795	835.519
TRHDE	11	107.252	7	16	48.961	12.255	0	3	5.003	41	52.301	29.302	14	8.858	119.252	17.176	28	17	17.229	20.956	17.954	26	52.748	16.495	57	60.195	13	1	0	4	1	2	3.038	3.508	3.024	6.751	7	2.014	20	2.002	19.09	27.561	13.487	4	18.673	26	7	3.47	3
P4HA2	21538.8	15585.2	12673.3	233.9	146.295	179.251	3974.51	3109.07	2100	2473.35	4694.47	3873.68	1580.43	9288.87	3611.7	4863.2	3055.42	1813.63	2508.36	1847.26	2639.6	2220.23	474.001	621.23	4895	5774	8934.83	3040	8143.43	4491	3702	7587.7	1376.14	4494.04	4582.03	6120.54	6786	10837	6208.01	9350	3388.57	3585.88	5550.29	4456	5943.67	4376.89	3166	11027.9	6657
FCGR2B	10	1	4.769	39	77.884	13.851	0	0	1	0	3	1	13	5	2	17.001	4.048	10.169	14.926	9.114	5	2.025	4	262.108	6	4	6.467	3	0	9	4	1	3.038	2	0	2	1	1.054	10.098	0	11	12.042	3	3	27.714	20	8	2	6
NFATC3	1140.74	951.062	1036.08	633.568	421.209	773.74	720.178	338.832	621.243	884.726	823.725	872.651	370.183	692.708	764.762	490.046	930.791	455.926	615.049	606.709	804.131	800.312	1033.11	1500.77	1353	923.919	1297.79	1529.92	1699.03	1147.88	1542.71	1173.26	557.648	1378.41	1342.54	1206.17	1507.46	1463.73	1424.92	1774.37	1066.3	465.129	1703.25	1253.03	1666.83	1289.54	1349.73	1044.86	1213.01
TRNT1	2477.43	2247.58	2350.28	356.436	301.228	361.895	2747.11	1051.62	1325.6	1064.15	1384.4	2203.57	1088.53	1473.46	1786.77	802.773	1450.71	911.303	1180.65	1060.3	1221.76	1425.18	577.4	760.537	1427.93	2429.18	3867.25	2615.37	3445.83	2095.28	3106.44	2384.84	966.649	1064.19	1947.3	788.162	2653.1	2043.17	1821.65	3303.8	848.698	1170.5	2461.74	2220.39	1661.35	2419.75	2080.21	1428.81	1505.49
ACADVL	4452	2485	7420	13147	21588	14260	8309	7254	8383	77181	14959	8232	36571	8410	8151	8438	9518	35507	66464	56519	31036	27363	21734	72653	71137	32170	9219	14061	12667	11957	14844	11855	59029	16253	26018	9849	13862	10745	144845	17788	65847	51490	15249	14899	140126	120947	36345	36170	22321
STK10	435	1404	1320	28	45	46	87	174	465	557	282	490.001	239.002	485	400	318	506	275	427	443	572.999	365	68	194	543	406	771	325.001	199	159	121	257	236	51	328.999	90	86	234	910	606	311	153	218	279	936.999	805	691	312	235
FBXW11	1687	2909	1718	479	313	464	742	1263	1609	1426.98	2069	4082	1492	2129	2228	1366	1910	1517	1550	2127	2172	2102	657	955	2053	3601	3422	1750	2980	1177	2028	2559	856	1144	1126	1803	1802	1859	3796	2373	1413	1822	1462	2539	2982.99	2559.99	3392	2805	1338
ACAP1	166.001	92.001	130	35.999	51.001	24.001	79	54	12	71	104.999	47	68	151.001	65.001	120.853	62.999	28	31	42.999	67	63	47	62	99	85	185.999	87	143.001	170	76.001	255	142	167	101.999	159	184	181	55	73	191.999	326	160	153	71	85.001	47.999	265.001	196
CRMP1	128	129	138	6	8.999	2	14	59	44	70	138	75	43	119	38	112	105	29	25	31	42	95	2	14	98	86	96	75.001	122	64	70	58	23	11	19	16	27	40	27	48	69	115	155	76	33	41	18	95	61
EVC	371	953.999	532.001	24	14	41	48	248	222	279	605.999	584	199	650	466	661	745.482	95	143	252	278	517	4	67	539	758	628	565.001	347	523	366	282	56	84	120	58	105	159	163	300	458	399	806	592	202	154	149	282	407
DERL2	5071	4643.89	4900.43	1276	904	1118.14	6632.41	1644.39	2695.01	1777	2468.31	2446.59	1565.23	2980	2157.66	1729.16	2249	1514.21	2000.43	1889.26	1888	1786.63	2758	4052	2771.21	2935.1	5400.29	3095.13	5683	3607.05	5098.05	3503.12	1116	3380.47	2477.51	4687.01	5820.3	6229.05	4214.24	5076.67	1638.52	1691	4044.57	3808	3910.43	2554	3178.24	3304.16	2987.03
SIDT1	13	5	9.031	3	9	1	320	597	916	136.999	124	83	124	196	206	366	271	82	120	172.001	137.001	396.001	3	14	302	163	67	190	21	68	114	25	6	6	6	8	57	47	31	21	47	50	68	31	10	30	167	25	152
NDE1	430.749	549.27	597.837	35.751	45	42	103.968	148.645	260.87	292.538	351.76	637.812	174.587	427.905	451.439	520.747	476.625	231.649	316.755	385.176	516.514	412.24	73	138	239.97	449.414	790.9	542.633	576.384	407.318	342	517.59	113.001	138.791	218.802	234.642	289.514	287.768	325.934	408.306	303.07	322.468	455.974	492.914	350.862	385.482	509.495	605.531	438.196
IRAG1	4233	3044	6064	1	6	1	2	0	0	1	1	3	5	5	8	5	8	4	0	9	3	15	1	15	1	2	14	2	5	6	0	5	0	0	2	2	3	11	2	0	1	9	1	3	6	20	2	0	4
TMEM38A	126	180	179	208	210	214	491	286	406	412	304	555	302	341	385	143	227	519	304	392.999	321	252.001	298	410	409	315	579	487	633	289	398	480	141	695.999	334	341	384	321	925	868	106	211	504.001	419	1358	787	793	282	364
AP1M1	2105.01	7128.01	4470	1154	960.998	1049	307	1364	2243.38	4674.89	3944.07	4633	2062	3984.31	5693.01	2026	5861.55	2739	4153	3682	5604.05	4533	1614	2324	5206	3302	5997.04	7451	3612.23	3799	2227	3839	2224	2181	4259.03	1933	2435	3129	8564	7263	3538	3636	5340	6164	8103	6638	10274	5683.75	5597.69
PVR	3476.97	13401.9	11645	1531	1189.09	1295.99	922	1604	2901.98	3499.96	2551	3873.99	1851	3591.97	4375.97	2117.95	1407.98	2133.99	2686.98	2986.99	3310.96	3278.91	1074	1797	3929.96	5738.99	10086	5179.99	4650.99	3400	2835	5406.96	1538.99	1318	3401.97	1849.98	2689	3652.95	6355.99	8224	2347	2280.98	3762	6247.98	6017	4626	6694.99	5279.94	3626.99
XRCC1	809.979	1121.37	1007.67	186	165	226	420	536.832	716.778	550.995	1365.95	1842.13	441.994	1730.63	1246.09	1235.82	1451.96	601.985	694.83	763.01	1418.97	1026.76	257.999	602	826.935	1314.52	2655.92	2279.12	1925.77	2160.99	1457.97	2128.02	295.002	1049.99	701.86	1407.88	1762.95	1675.88	917.058	1486.81	681.943	1032	1933.95	2274.92	837.293	607.001	1888.73	1847.93	1667.11
SCARB1	332.984	1017.87	938.724	3260	4064.01	3059.05	300.999	1191	1773	11917.4	9273.56	8435.65	6366.98	7662.13	8094.1	2610.13	7923.99	7675.17	8546.06	7847.25	7991.82	6411.11	7442	11899.6	18124.1	8849.02	7906.17	6982.83	4002.47	5937.99	2635	4677.15	5589.99	2651	7059.96	2147	3380.99	4317.09	18525	5157	3642.28	3574.98	5912.99	5753.02	20327.2	11822.9	7947.99	10569.3	7673
CYP2W1	0	1	3	1	2	0	1	2	3	2	4	0	2	7	3	7	5	0	2	5	1	3	1	8	2	1	4	6	1	8	5	3	1	4	1	2	4	0	1	5	9	8	3	0	2	0	1	5	6
MCM2	145.303	628.714	372.08	22.319	20.519	22.34	413.848	265.565	2049.51	173.182	1157	1439.21	188.256	1633.79	1588.13	802.521	847.712	809.032	700.434	1011.88	1750.32	877.764	18.36	244.537	246.741	1546.61	3417.05	4988.32	1527.79	3362.11	1639.87	1586.59	106.822	258.51	224.251	455.552	1212.83	1513.79	392.43	2155.39	185.32	492.883	1509.87	3364.65	223.574	293.208	5663.29	1560.06	1220.75
MOV10L1	68	169	210	31	32	89.999	0	1	1	3	2	0	12	5	1	3	4	5	7	4	5	2	62	7	4	4	9	5	5	4	1	3	16	11	18	3	2	3	13	2	13	9	1	8	11	6	1	7	7
PANX2	61	16	78	172	268.999	118	4	2	6	98	18	2	61	15	1	31	17	67	64	20	27	15	389	612	21	14	15	14	8	19	8	8	112.001	21	185	7	8	17	155	17	10	14	7	12	259	177	16	6	24
SELENOO	903	278.54	1279.85	2394.99	2657.96	1372	368	450	614	1856.8	494.885	353.334	501	537	533.703	342.948	543.978	701.488	1817.3	716.981	574.722	821.932	4287.76	4622.99	3202.24	788	912.993	1492.19	1611	1001	1772.99	1159.94	1451.96	1143.91	1489.8	693.956	906.958	941.951	2596.52	850	1054.33	659.272	1133.96	843.263	4492.13	2552.39	2808.97	1263.16	1033.71
TP63	8	3	4	5	14	2	11	3	14	6	0	6	9	4	2	21	3	14	11	8	3	3	4	10	3	1	7	3	5	4	8	1	9	0	0	2	1	2	3	0	14	6	5	4	3	11	0	6	8
ALPK1	618	787	613.999	90	71	82.001	426.013	200.001	187	414.001	465.999	365.019	146	597.001	391	331.001	565.998	259.721	345	376.999	298.001	361	256.999	389	485	669.001	497.999	233.641	381.024	235	349.002	301.174	259	258.999	280	320.001	379.001	262	385	245.001	476.999	550	402.025	292	324.001	434	216	664	347.519
LLGL2	30.999	30	110	735	782.999	674	3716	2506	3733	1617	1249	1155	893.999	2505	1127	2252	621.001	632	1070	1130	667.999	905.001	2082	1993	2039	2037	4073	1288	1741	1406	1784	3342	862.002	914.001	984	721.999	1047	1362	1493	776	1001	773.001	1236	1246	1755	1410	804	1784	1178
PDE8A	846	446	799	664.001	515.999	587	1048	504	525	1003	697.001	513.001	496	741.001	366	454.999	501.998	362.999	649	614	503.001	573.001	1378	1303	1656	787	839	682	1074	600.999	999.001	1087	634.999	729.001	751	768	902.999	671	1394	782	892.001	785	902.001	655.001	1249	1203	1108	1174	674
CLCN4	149	170	181	77	83	91	47	57	71	314	107	275	214	172	165.999	111	252.001	292	314	204	188.001	237	131	227	317	147	500	204	152	115	172	206	130	114	242	70.999	121	149	439	86	100	71	207	173	477	506	239	110	132
NLE1	248	378.001	589	126	108	172.999	198	220	560.999	848.315	1232	1777	561	1122.9	1538.62	570.973	1512.45	595.001	626.839	873	1261.98	1279.83	173.001	518	855.9	1356	2155.47	2096.11	1483.91	1537.79	1465.25	917.365	360.843	514	1018	791.181	1448.28	1864.19	1027	1921.2	455.999	460.743	1622.8	1548.33	675.613	741.86	1877.96	1730.82	1402.9
SDHA	5170.57	10237.2	8146.01	8630.32	6653.86	7159.45	7435	8750.8	9587.51	11013.3	11480.5	11627.7	4898.41	13329.9	15136.1	6586.52	10257.6	6636.09	8140.97	8428.76	8875.73	8122.79	8489.2	13999.2	15158.8	15238.6	19625.4	14972	12452.7	13654.1	8602.42	14794.5	5878.04	10688.3	12965	8314.87	12235	13496.6	20538.9	10740.1	6356.42	6489.68	14379.5	12764.9	25998.4	15647.3	16294.7	10789.6	11645.3
SMARCE1	8722.85	8437.9	10024.1	1148.89	858.838	1002.22	9625.48	3097.18	4870.75	2575.38	6331	6999.5	2265.48	6857.09	6200.77	3872.6	5523.45	2210.73	2586.53	3216.16	5105.6	4338.77	1847.37	2569.19	4535.49	7633.51	13008.5	10747.7	17961.1	11704.5	12656.6	9891.79	1611.77	7430.91	5135.27	6969.26	14124.7	12014.1	4914.9	11665.7	4015.17	5913.21	10825.1	12575.9	4495.22	3427.49	8786.51	9271.42	7142.99
FNDC8	0	0	0	0	0	0	0	0	0	6.685	0	0	0	4.1	2.384	2.026	4.524	0	5.161	0	5.021	8.173	0	0	3.1	0	4.528	2.889	15.084	4.205	3.748	6.635	3.157	0	0	2.82	12.721	7.809	0	4.802	0	2.258	1.191	3.673	3.386	3.141	2.039	8.176	2.095
GSDMB	413.999	199.999	425.001	258.001	510	263	384.999	161	83	330.001	461.001	183.001	136.999	410.999	204.001	155.281	158	131	150.998	190.001	268.001	233	2390	1253	451.999	239.999	267.999	159.001	904.999	347.197	450.001	1070	478	813.999	383.999	1199	841	331.001	578.175	536	1147	2033	514.001	412	808	629.001	104.075	1745	880
KDM5A	3929	2803	4387	747.001	695	773	1608	1143	1606	1523.97	1686	1615	772.999	1996	1417	1366	1499	686.001	897.001	997	1252	1636	1304	1995	1514	1848	2700	1593	2934	1356	1658	2411	883.001	1101	1249	1226	1338	1528	2362	2530	1367	1379	1716	2008	2298	1444	1664	3179	1447
ADAM11	9	0	10	5	4	5	10	6	8	11	16	24	16	23	29	18	19	8	15	14	11	16	5	4	29	17	24	7	16	20	12	23	10	24	26	18	25	13	37	13	20	14	21	13	11	14	18	38	24
PPP2R3A	535	599	675	34	51	43	240.999	158	225	383.999	283	287	234	565	139	403	356	274	224	269.999	438	269	95	67	393	426	958	331	749	244	297	945.001	159	258	234	362	343	530.999	662	719	386.001	422	384	717.999	602	437	397	716	381
FERMT2	11966.6	7872.01	9545.65	2349	1440	2862	33	116.001	91	865	737.001	802.002	364.003	712.073	400.002	334	648.089	465.001	730.683	445.001	744	422.002	2162.01	2320	871	830.001	1859	1457	3022	1405	1750	2455	547.999	957	907.001	1625	1487	2150	1399	1351	955	896	1067	1947	1306	1181.01	1024.01	2576	1181
ABCB11	1	3	16	3125	3216.96	2036	11	16	18	1174.94	20.226	6.019	45	4	11	28	59.732	64	163	120	53	112	6088.98	9035	618	7	6	10	5	6	19	2	347	4	120	6	4	11	652	33	53	27	47	14	583	326	35	5	12
DHRS9	0	0	67.001	12	10	11	6153	635	5743	11	9	6	15	4	4	9	0	67	28.999	30	17	17	9	59	52.999	40	5	1	5	2	3	5	3	0	67	1	2	7	509.001	52	14	8	14	3	544	228	24	13	5
CD5L	4	0	0	113	216	192	0	0	0	0	3	2	3	1	2	5	0	3	6	0	1	2	79	912	2	1	3	0	0	1	0	1	0	1	0	0	0	0	0	1	3	3	1	2	1	4	1	1	0
PTGS2	979	307	171	5	9	7	0	8	2	1	0	1	9	2	1	9.656	1	3	6	7	1	2	1	10	3	3	18	0	2	5	1	4	2	0	0	2	1	4	6	0	8	4	3	0	3	8	1	10	0
IGF2BP2	2585.99	1069.99	1423	5	19	3	790	622.001	575.987	653.997	769.996	334.999	329.932	724.987	318.997	851.975	323	158	206.999	283.001	240	552.001	5	34	1221	579.999	805.992	720	1080.99	763.997	935.992	1248.99	191.994	418	379	602	840.999	768.999	430.989	436.001	649	502.986	1007.99	750.989	382	500.99	321	889.991	724.998
MAP3K13	2067.42	1562	1917	869.996	809.578	1006.98	3634	1205	1530.91	1957.7	2523.92	2500.93	1114.99	2822.99	2256.06	1565.43	2258.01	1469	1402	1556.53	1533.49	2339.78	1692	2558.73	2316.06	2659.46	3260.47	2379.71	4028.15	3343.36	3811.33	2937.24	1433.98	4181.95	2573	4352	4830.09	3494.37	2154.95	2356	1911.64	2144.7	4027.68	2699.64	2545.71	2171.89	1692.83	3181.25	3130.65
ST6GAL1	1719	3161	1854	14195	11058	17580	723	2396	2008	20293	24620	22380	11733	14646	15969	5838	33537	23320	15465	26493	19804	21611	30131	28227	28926	21867	8371	17851	10108	15688	17730	4948	15282	39727	23610	14305	22578	19059	42429	13489	12924	11937	31404	14633	37698	22904	11234	16447	26360
TBX21	5	0	1	0	6	1	0	0	0	2	0	1	2	0	1	5	2	0	2	2	2	4	1	0	0	0	2	1	0	1	1	2	0	1	0	2	0	0	2	0	4	2	0	1	7	4	0	1	2
VDAC1P1	13.083	42.52	11.042	1.001	2.005	5.031	25.813	9.003	28.664	18.114	29.164	23.243	13.726	38.793	41.27	36.306	24.169	16.095	18.437	29.983	27.847	28.282	1.002	12.043	11.071	15.876	15.138	10.817	22.383	19.06	18.079	19.07	3.002	18.029	19.052	11.299	25.885	11.065	24.068	10.717	8.034	7.037	13.916	11.033	24.364	7.023	23.103	10.03	14.047
FRY	2309.9	2370	1759.89	341	242.89	271.894	278.999	251.293	50.001	1204.99	1298.19	503.062	393.452	827.991	337.9	665.105	687	291.325	573	685.001	639.965	368.001	521	1467	2482	340	454.272	764.001	1090.99	715.796	495.001	583.001	933.002	1520.87	1858	585.009	722.951	717.205	1521	339.983	1153.62	880.742	1152.94	693.332	1071	1067	251.001	944.991	963
PICALM	7780	2532	6375	1453	1280	1244	2555	1198	1006	1418	949	713	811.001	1467	511.001	1071	898.001	633.999	839.001	782.999	792	1327	2290	2964	1867	981.001	2121	1685	3175	1235	2753	2967	554.999	1370	1396	1635	1959	2332	1817	1268	818.001	708.001	1248	1709	2402	1847	1047	2658	1237
NSF	1619	7095.46	2976.82	251.945	205.002	238.001	1471.95	1493	2226.25	1153.18	2349.25	3252.86	1038.09	2399	2672	1480	2517.51	1251.82	1472.33	1616.93	1881.26	1821.81	369	673.893	2050.94	4089	4766	2510	2070	1172	1609	1306	756.528	508.861	1124.36	451.028	980.001	1097.14	3837	2454	1275	1217	2002	2382	3669.36	2371.02	4154.19	1792.52	1124.91
GLI2	1154	605	1268	4	17	2	209	90	209	44	100	27	42	143	16	68	119	36	55	84	126	152	8	3	20	105	172	210.999	381	192	150	477	2	30	6	141	160	239	11	343	32	78	155	269	1	11	134	367	185
CLASP1	1579.67	1449.02	1341	423.001	361	416	178	634.999	731.999	971.044	1084	1363.95	522	1329.24	959.625	1209.89	1217	495	587	677	1184.78	857	721	817.998	1158.48	971	1507.26	873.998	1197	740.998	662	1321.09	457	374.999	437	479	626.011	800.947	1149.34	1040.98	919.906	1022.7	829.001	1203	1214.16	1129.74	1205	2032.21	886.944
MRPS34	3539.72	5013.54	6660.38	4136.77	3275.39	3569.22	4457.53	3014.15	7295	4733.26	5330.79	6725.71	2835.06	6527.06	6077.66	3553.79	4994.86	3714.75	4154.65	4609.13	5296.79	5041.69	5379.37	7324	5077.38	6106.78	11050.5	12526.3	11546.4	10259.1	9195.48	8324.4	1905.96	6010.13	6084.33	7973.1	9648.16	11304.1	7866.36	8971.04	3184.2	3704.84	8825.84	7513.07	8990.82	5990.1	11994.3	6869.78	6519.62
NOTCH3	3911	1511	3473	7	17	2	114	509	55	19	91	8	24	233	9	398	9	17	28	12	25	13	2	17	12	38	317	8	140	62	98	1186	8	7	8	82	56	633	21	8	20	17	19	92	29	13	11	178	27
CLNS1A	3900	4012	4932	1420	976.991	1249	7539	2165	3062	1972	4029	4138	1608.99	3860	4213	2109.98	3369	1399	1907.99	2086	2548	3160	2023	4493	2606	3706	5059	4280	5639	5019	6136	3600	1167	5693	4476	7141	7467	6251	3353	5762	2613	3109	5919	4122	2787	2505.99	4133	4611	4683
PPP2R2C	8	5	3	0	4	5	2	6	8	16	7	7	38	4	8	26	9	17	31	11	22.001	2	2	14	5	3	18	7	9	14	4	4	13	1	23	3	5	1	22	2	17	9	8	16	21	60	14	4	12
TEAD2	903.064	294.486	857.19	23.391	28.121	21	109.488	135.965	159.578	63.977	178.326	111.783	81.452	156.812	63.586	245.965	92.728	65.095	101.556	83.132	142.97	115.992	45.486	136.466	126	78.85	140.906	195	455.045	255.672	450	186	64	194.807	162.298	289.763	309.818	419.813	151	262	67.936	97.285	225.985	274	144.565	147.143	123	167	148
EED	923.965	564	1022.97	117.001	106	131.001	1530	335.001	529	476.823	352.999	360.479	426.857	526.999	467	253.41	294	304.716	430.093	360.944	313.685	403.998	292.533	403	648.554	446.711	741.001	953.98	1157.96	1007	1380	791.973	318.817	484.999	384.001	745.828	899.966	834	1230.6	1038.86	421.581	566.811	812.001	743.972	1219.77	561.093	1596.78	726.934	622.996
CDHR2	2.021	0	5.016	453	287	990.483	763.272	1482.25	1110.26	5802.63	4972.58	3446	1781.64	1601.14	6043.96	1578.11	4553.7	5337.58	5846.73	6066.61	3345.49	2840.52	1109.81	4171.12	9257.1	10122.7	1465.34	2424.78	402.999	1363.91	2331.77	776.213	1749.14	969.391	3407.13	592.443	1275.74	1059.17	22669.8	1664.35	6277.68	2107.76	3445.21	1903.51	23335.6	16068	3297.26	2476.48	2699.14
SNCB	2	0	3	0	3	2	2	3	8	1	2	1	4	2	1	1	3	0	2	0	2	2	0	1	3	0	5	0	6	4	1	3	0	0	0	0	1	8	2	1	3	1	0	2	2	4	4	11	2
TSG101	5317	7607	5997	1428	881.001	1075	7639	2813	3902	2584	3333	4268	1943	4410	4174.85	2875	3236	2094	2837	2289	2910	2899	1127	2369	4219	4637	7253	5337	8160	5828	6927	6429	1411	5048	5388	6784.14	7151	7428	5478	7316.49	2429	2432	6006	5548	4942	3639	5045	4894	4399
NCBP3	1487.09	730	1491.05	293	316	264	1168	552	818.001	732.999	542.995	477.001	494.001	680	415.002	582	429.999	423	640	639.265	656	665.999	572	788.999	1012	874	1006	823	1391	748.999	1127	1012	542	575	540	467	845.001	835	1343	1167	626	944.999	734	977.001	1346	1138	1670	939	680.001
ATP2A3	104	12	37	4	14	8	489.001	408	900.999	19	12	8	3	55	211.001	82	15	8	48	160	7	7	4	13	46	36	16.001	14	6	22.001	18	9	5	2	4	2	7	13	5	1	17	10	8	10	8	1	6	5	9
CA12	680	659	449	7	4	5	6387	2632	933.001	3191	1681	584	4059	885.001	1427	954	487	3895	3250	2273	1451	1096	14	28	5987	3649	338	595	295	467	548	98	1778	936	4195	1617	1566	1361	17710	2507	1860	1781	1509	158	25561	21260	3409	1910	1923
MGLL	1578	6998	6021	7906	5113	10176	3932	5655	4144	8443	5126	12384	2303	5892	4961	2053	4766	5491	4067	7082	4683	5325	13171	14529	11577	17283	22559	8457	20672	10138	10391	26604	3152	5492	5142	8775	11022	15157	15426	9320	2813	3482	10463	17272	12782	8325	3183	25721	12214
NTN4	5081	1780	2190	119	231	182	1663	806	545	277	275.999	334	302	571.001	183	214.999	94	191	182	170	223	217	211	319	278	209	1151	226	561	118	278	999	57	106	206.001	205	137	152	337.999	1554	117	221	138	155	336	521	756.999	427.999	184
BCS1L	1654	1439.11	2109.81	884	514.999	624	1653	859.001	1767	2084	2795	2955	1360.52	2304	3089	947	2835.69	1412	1714	1923.57	2273	2611	1040	1242	2184.03	3444.6	4752.92	4051.15	3536	3461	4122.11	2318	1472.27	2403	3162	3025	4598	4525	3939	3823	1512	1984.14	4941	3339	4243.54	3180.24	4566	2531.84	3600
NUAK1	2764	1349	2363	48	70	132	138	91	79	157	137	61	170	166	44	154	115	152	158	116.999	180	91	101	324	224	77	322	260	605	189	261	754	163	199	195	191	204	314	301	298	159	174	238	372	286	228	202	893	270
DPP8	2574	2780	2256	253	282	293	1609	1023	1287	802.001	843.001	1183	628.001	1263	1189	950.999	902.999	558.999	689.998	784.001	883.998	898.001	608	714.998	1091	1413	2794	1599	2064	1031	1358	1765	469	759.999	782.001	839	1019	1086	1724	2055	647.999	783.999	1262	1450	1663	1209	1527	1321	781.999
SLC24A1	207.591	102	184.505	47.499	50.694	55.505	62.227	92.009	40.414	157.201	94.024	118.141	97.538	187.064	132.02	167.972	170.013	82.818	101.868	104.28	140.694	103.001	169	155.507	192.019	153.001	197.018	87.001	93	82.001	83.04	71.999	80.013	76.999	143.28	68.042	83.059	94.007	120.668	44.029	73.276	124.047	88	99.995	177.236	156.077	48	128.01	127.034
ZNF532	3400.95	2409.95	2551.91	6	19	20	314.995	197	225.996	94	246.943	200	151	712.937	103	934.822	124.888	69	122	167.999	186.001	79.438	4	29	264.941	299.001	1049.92	299.996	1284.99	503.989	315.999	1067	28	94.999	63	309.001	428.001	742.001	150	417.999	171	206.981	327	876.999	92	102	135.965	836.98	251.988
SCARF1	44	24	65.726	48	69	58	5	8	12	59	12	8	25	12	9	31	18	19	45	21	15	10	159	163	130	17	12	9	3	6	12	14	100	8	64	4	7	4	130	3	29	22	19	5	191	112	14	12	24
LMAN1	7912	4240	4420	5029	4589	3922	7736	7458	6541	5637	10773	10106	5018	16257	5625	7338	10504	4768	5494	8411	7154	7149	10049	8935	7037	9788	11901	4958	8188	5568	5528	11454	3093	4121	3336	8498	5995	5571	11292	6733	10112	9942	6036	5394	9883	5370	6285	14496	6363
HACD3	4266	6913	5213	3003	2212	2877	6338	4968	7050	7546	6995	7604	4949	7029	6792	3864	7803	5574	6574	6222	6284	5796	3866	5552	8430	10601	12284	10855	8785	6850	7030	5890	4927	4154	12153	3214	4838	5244	20426	10300	5468	4610	9771	9037	16125	10666	12154	4903	4736
IPCEF1	16	2	16	3	14	6	6	1	4	16	9	3	26.001	16	4.417	53	9	21	36	17	10	7	13	16	3	6	24	2	4	7	3	21	9	1	4	0	3	0	8	1	37	30	4	5	24	22	1	3	9
ZZEF1	946	620.001	1095	170	228	269.999	277.999	345.999	764	997.998	525	676	591	603.999	547	512	627.999	475.999	768.999	873	670.001	827	521	789	1100	715.001	921.001	733	502	465	503	552	600	499	672.001	298.999	374	520.001	1634	866	463	451.999	661.999	611.104	2206	1550	942.001	660	490
NOX3	0	0	0	0	1	0	0	0	0	0	3	32	5	2	20	0	2	1	1	0	1	0	0	0	0	3	1	0	2	1	7	0	0	1	0	1	6	0	0	0	0	1	2	21	3	0	2	0	3
ENO1	49684	98239.9	84844	13455	7410.07	10628	45691.7	36577	69763	88521	140492	83067	31405	166264	83652	113802	108492	46086	54722.5	73120	110493	68755	10434	27659	133044	104078	208514	173063	217813	206254	117356	151226	25624	101757	100840	159922	211222	268211	135108	171627	77845	79946	181168	188455	125791	78711	163563	233050	201619
SLC12A1	1	2	1	2	13	4	0	1	1	13	7	0	202	4	8	24.001	2	33	35	5	8	4	2	21	0	5	6	0	2.057	8	1	2	13	2	2	1	1	0	25	2	11	3	1	1	25	55	3	0	7
MYDGF	16512	19946	33837	7889	5338	7257	10813	13935	20288	13751	20317	10939	8460	28036	12251	12293	14673	10925	12598	14158	13436	12791.8	8760	19793	20037	16984.1	29945	21109	42008	29888	27459	33726	5964	23508	16192	48093	39030	38198	24237	28336	14280	16762	29845	21621	31257	16379	21200	26662	25730
ANO8	47	7	24.016	13	32.034	17	35.017	21	28.014	31	16	24	18	38.062	31.259	41	17	10	24	23	23	19	18	13	31.703	13	41	20	69.98	38	30	50.031	22	19	26	55	38	15	50.051	44	72.999	59	43.053	48.006	39	26	32	69.396	39
TUBE1	2181	1323	1437	1590	947	1047	2229	350.001	444	564	638.999	909.999	430.999	783.999	738.002	388	741	448.999	599.001	447.999	585.999	732.999	2063	1049	602.001	773	1443	1075	1797	1049	1302	1268	490	961	1279	828.999	1290	1048	2197	1768	689	816.999	1200	1020	1470	1096	2010	1050	790.001
ARHGEF10L	668	1089	1092	2238	2451	1753	423.999	598	642	3679	2179	4016	1768	1795	3839	1322	3777	1875	2402	3543	2067	2814	4811	5211	4002	2815	2712	1888	776	1092	1599	894.001	1754	897	1249	756.999	1063	1039	3357	711	1304	1344	2343	1819	3312	3978	1237	1761	2174
TXK	0	0	1	5	8	4	95.999	34	21	37	17	17	30	40	5	24	14	13	14	22.999	28	16	24	17	13	25	32	10	11	12	24	28	43.999	16	24	6	29	20	154.999	38	16	9	35	16	196	160	22	16	18
WSCD2	0	2	3	1	3	0	0	0	2	0	6	2	2	4	3	10	2	3	4	1	8	1	1	1	1	3	5	2	0	3	2	11	1	0	0	1	3	0	1	0	8	3	1	2	4	4	5	2	3
KCNQ2	5	3	15	4	18	6	0	1	7	5	17	6	3	16	6	20	9	9	8	6	10	8	2	9	15	18	19	14	2	17	15	6	7	3	0	4	3	1	8	3	27	32	12	13	6	16	9	4	17
TACR2	14	29	31	1	1	3	14	13	17	10	7	5	7	14	88	17	15	12	12	6	15	15	2	9	10	11	27	9	11	10	8	6	3	3	2	6	7	5	5	4	7	6	9	12	19	18	13	16	7
ACTR6	1296	1169	1045	257.001	173	199	2566	552.001	716	473.461	752.649	885	553	796	741.435	571	703.999	524.999	677.001	483.875	549.001	635.002	400	719.001	644.001	889	1279	1098	1819.74	1329	1394	1142	416.999	1017	1022	918.001	1580.8	1381	1361	1249	616	702	1257	1254	1156	885	1033	1105	943
TIPIN	231.482	229.034	306.083	76.011	48	77.06	273.063	99.238	335.204	158.026	274.038	325.019	151.038	388.024	357.044	188.03	382.045	272.01	293.06	230.006	404.022	375.077	87.009	171.027	176.234	363.011	1028.04	719.018	692.061	642.019	675.062	563.04	68.008	364.04	259.032	376.03	700.025	840.02	254.009	705.028	211.029	253.019	582.044	602.012	207.008	201	1004.02	441.016	404.013
SRI	8234.99	8631.99	11339.9	805.999	716	631.001	17478	3505	3442.99	1625.99	3050.99	3387	1607	3985	2997.01	1497.96	2480	1413.99	1708	1845.99	2002.97	2304.95	1541	2501	1836.96	3378.97	6656.99	3506	6788	4625	6397	3493	1311.99	3318	4046	5292	6655	5925	3558	3839.99	1462.99	1708	5285	3110	3385	2789	3165	2933	3774
EIF4G3	4425	1612.76	4368	227	269.001	244	2049	1264	1454	891.999	882.983	871.001	690	1101	584	744	862	525.001	736.001	810	856	1123	653.999	1419	1327	965	1943.79	1252	2710	851.001	1416	1914	549.999	826.001	1267	826	1084	1379	1447	1259	1012	856	1114	1382	1772	1718	906	1646	987
NUP37	1118	1036	1224	196.001	139	134	2577.98	641.001	1463	503.001	777.999	817.313	409.833	1254	830.001	634.001	752	518	655	575.001	867	749	230.001	548.999	582.999	1032	2218.99	2048	2720	2358.4	2483	2054	284.001	1017	767.999	1641	2509.99	3006	752	2071	410	694.999	1634	1752	586.999	574.999	2628	1513	1247.99
SEMA3A	404	779	1396	0	6	3	3	49	53	4	9	2	23	78	26	138	8	10	25	11	5	5	2	8	1	3	25	5	2	7	1	5	3	0	1	0	0	19	8	0	13	14	2	0	11	7	5	5	15
GTSE1	97	137	125	3	5	2	130	120	772	12	194.001	209	26	492	253	301	256.001	167.999	256	228.999	487	172.731	6	127.001	9	277	880.999	1136	513	729.001	492	510.989	19	19	3	83	277	414	109	401	20	158	333.001	727.999	108	44	1711	387.999	262
SEMA3C	5669	1516	1832	1	4	1	482	487	274	211	460.001	1227	198.001	1129	273.999	464.001	515.999	168	116	171	388.001	411	2	11	182	651	1239	355	1446	318	477	1722	1	135	11	571.999	481	1102	43	501	264	560	412	1636	13	14	151	1009	312
TTC38	374	1144	740.999	4759	4114	4945	646	2327	2937	5645	8255	8636	3533	4936	8073	1709	7721	5441	6009	5983	5706	5532	6534	10243	10635	10068	4953	9534	2945.93	6960	3708	3222	4834	6888	11035	2172	4239	2972	15076	7384	5545	4116	9453	6160	20371	10569	8882	4561	8245
ACAT1	4373.9	6535.5	6830.43	21797.9	16939.1	21028.7	4179.53	2648	3963.74	8745.64	6487.49	4792.79	2630.95	6711.57	5900.71	2372.97	6405.84	4270.59	4730.84	5143.92	5910.1	5301.98	35715.6	52903	8727.94	6361.92	7700.42	10209	12379.7	10540.9	10928.8	4665.12	3713.97	15613.8	10092.8	10555.6	13455.9	13005.2	10931.9	8136.9	4391.98	4574.98	11562.9	8122.93	11726.8	6909.28	11249.5	8298.91	9891.9
GRAMD4	205	78	159	916	794	357	407	318	373	424	338	172	264	363	183	240	132	163	273	197	265	260	1302	1172	839	327	238	485	690	407	488	287	271	343	511	418	464	484	545	339	394	347	548	304	795	732	267	397	415
CELSR1	105.999	14	67.001	57	68.999	61.999	166	342	170.999	842.001	518.002	737.001	552.83	656.999	499	441.001	654	339	411.001	434	697	815.998	289	122	718.001	587	939.999	747	1013	587	978	857	499	339.999	721	375	545	782	881.999	367.999	300.001	292	588	605	1071	1571	618.001	731	721
WNT8B	2	2	0	0	0	0	0	4	6	1	15	9	3	9	5	4	8	4	1	0	8	8	0	2	0	5	5	9	9	9	4	11	6	1	2	3	4	4	1	5	7	11	15	5	6	2	3	8	10
ZNF638	3136	1926	2466	948	875	649.999	1489	757.998	1023	1292	1319	1683	691.998	1672	1074	1068	1471.19	780.018	818.001	924.002	1222	1518	2035	2105	1392	1164	1688	1526	2186	1150	1338	1683	921.998	943.999	1003	767.999	1067	1153	2581	2362	1410	1593	1369	1513	2278	1675	2311	2567	1164
SLC25A40	147.999	378.102	196	127	130	116	350	274	435	230.257	272.218	450.179	172	611	444.956	430	376.88	302.735	333.162	309.265	351.621	209.267	224	227	270.114	379	812.004	420	352	267	249	336.026	143	146.195	122	99	176.037	234.999	398.001	275.01	234	253	231	408	275	212.107	661	446.001	204
TIMM21	2331	1870	1954	831.001	566	830.999	4594	1310	2341	1196	2283	2647	979	2988	3051	1177	2187	1331	1269	1386	2030	1993	940	1818	1776	2919	5625	4988	7812	5646	6960	4771	832.001	3550	2457	6297	8296	8627	2672	6181	1572	2525	5260	4870	2509	2091	6042	4190	4410
ADD2	11	0	8	6	20	3	2	0	4	8	10	3	19	19	9	38	13	20	27	20	26	9	5	6	9	5	5	6	9	10	4	5	5	2	0	0	4	6	1	1	23	25	5	4	5	8	3	6	8
FGF4	1	1	3	3	0	0	2	0	0	2	0	0	2	1	1	2	3	1	2	3	3	1	0	1	3	0	5	1	0	2	1	1	0	0	1	1	1	0	1	0	3	0	0	2	0	1	3	0	5
RASAL2	1935.35	617	1693.75	39	72.001	52	397.001	277.289	319	397	323.033	380.027	298.166	476.993	233.011	340	243	286.506	218.999	318.013	571.059	467	134	206.139	372.999	543	732	671.999	1298	547.046	759.999	950.592	72	199	103	360.999	674.044	851	285.999	569	197	313.421	370	701	299.001	464	522	1252	488.001
VPS9D1	279	189.969	453	230	360	184	44	106	89	259.956	75	79.979	95	115.752	71.944	113	58.388	83	136.001	95	90.999	74.988	546	383	251.99	86.677	156.999	78.202	122	73	68.393	91.835	117.001	113	218	56	60	77.33	265	145	79	81.102	149.923	99	309	272	97.973	119	138.359
ZNF37A	1246.11	931.738	857.571	118.344	163.725	171.04	524.659	287.28	420.78	538.249	752.222	893.814	231.603	781.961	631.16	429.921	835.436	235.717	280.74	356.679	548.201	668.126	368.961	662.873	628.253	892.33	1481.17	805.461	1439.56	819.345	1116.04	979.941	396.605	814.179	509.382	658.361	1009.04	859.935	821.552	1277.06	749.156	967.905	1080.74	981.134	671.914	707.126	879.131	841.203	940.523
MARK3	3051	764.999	2569	466.999	512.001	380.002	2022	522	595.999	1123.03	455.999	421	566.999	654.999	382	570	373.003	393	750.545	487.002	494.999	743	1070	1037	1408.9	488	1009	828.001	1551	561.001	1979	1240	576	525.001	611.999	727.002	892	1069.94	1281	990	606.999	687.998	801.997	786.002	1738	1531	1561	1154	740
SLC25A3	21937.5	29789	37335	7627	5141	6572	17623	11106	21339	25010	15582	28461	13430	19914.4	24496	17533	18840	15884	18569.2	17682	20624	18801	6675	14881	22020	20554	35081	26096	23509	22071	21051.7	20541	6741	11045	13062.4	13655	20868	26370	34703	26449	7209	7561	22017	24321	42298	25671	34313	22855	16888
FNDC3B	9117.02	3601	7351	1215	822	1355	2028	2190	1933	4002	3787	2053	2397.29	4328	1835	3263.19	2482	1479	2229	2697	2427.58	3815	2673	3576	5373.07	2246	3377	1988	2745	1592	2441	2944	2003	1446	2434	2185	2245	2533	2957	1357	2529	2063	2640	1633	2969	3279.12	1850	6041	2829
FOSL2	3857	1792	1970	1116	1246	984	2742	1143	1152	1312	1284	1056	439	2031	1124	938	1478	662	637	1270	1439	1304	394	1048	2336	1446	4836	1491	3827	1609	1362	4663	421	1171	931	2198	2210	3117	1973	1634	1640	1494	1830	3992	1675	1047	1515	6362	2816
CACNG5	7	6	7	2	15	3	0	0	3	12	7	4	8	12	12	38.084	11	6	5	7	14	9	3	9	9	13	7	4	4	12	3	2	5	2	0	3	5	1	2	3	17	15	3	14	8	6	4	7	19
CACNG4	2	1	2	0	3	0	23	102	52	14	87	41	11	154	10	41	13	15	10	18	18	7	1	4	6	96	91	73	237	203	262	536	5	13	5	103	107.965	85	3	15	6	7	10	29	4	4	9	162	33
FRYL	907	494	955	194	265	221	1164	716	615.999	512.001	481	320.998	418	727	310	704	412	218.999	292	398	358	578	642	663	737.001	387.999	672.999	564	938.999	408.001	649	1026	331	364.999	406	386	502.001	569.001	929	685	360	445	597.001	481	1145	723.001	494	977.999	564
TMEM131	1778	557	2050	355	288	242	874	640	694	914	598	430.001	629	736	377.999	652	602.001	508.001	682	661.001	625	853.001	606	970	1068	589	771	989.001	1468	622	1342	702	484	656	841	640	847	1098	1465	853	543	442	796	584	2160	2257	860	857.001	688
FSCN1	1331	2132.99	2834.97	13	28	9	203	461	622	311	2938.98	2249	713	1994.99	385	808	1368.98	392.957	234	528	2383	1265.98	11	73	600	360	6269	5221	5570	3719	1545	6945.99	6	812	337	2018	2325	3627	194.994	6364.99	1055.98	793.001	3239	9309.99	97.93	153	3779	7029.99	4541
ACTB	485715	968202	894332	64623	56476.9	52491.7	80231.1	136137	299289	185134	288015	227443	87020	342966	259488	224641	254804	150261	154774	175720	285980	213901	52258.2	119426	263037	299490	569729	367345	326353	316677	183103	241040	52862.2	74865.7	128914	99504.1	191928	328910	247834	380876	77276.8	103654	279619	388405	313273	220307	519688	349132	264371
MOCOS	114	312	99	1062	609	528	387	257	608	2138	937	1631	1196	718	1625	414	979	1728	2198	1358	1422	1627	647	1296	1336	1707	1020	1386	658	790	802	353	773	560	1922	222	417	394	4827	2482	844	615	1095	1004	2602	2307	2637	496	548
PLD1	426.001	538.001	465	439.001	344	399	1586	1755	2156	685	1783	1242	644	1443	1197	1439	1793	395	595	1004	883.001	1250	1267	903	1230	2173	820.999	687.999	731	500.999	1026	800.001	256.001	400	383	619	737.999	709	602	357	798.001	974	1491	803	529.001	526	321	1219	896
ATP12A	1	2	0	0	4	0	0	34	0	2	0	2	0	105	23	121	5	0	2	0	0	2	0	0	1	1	3	2	0	2	4	10	0	0	0	0	0	0	0	0	0	1	1	0	0	1	0	2	0
WDR62	35.001	30	38	5.999	21	11	12	46.001	326.998	63.084	117.001	269.999	123.001	264.999	277.001	147	319.001	232.999	229.001	241.002	505.001	200	20	62	95.001	194	433.999	594.999	144	302.001	139.998	168	62	19	64.999	26.999	84	164.001	237.001	245.999	69.001	94	173	291.999	302	322.998	1210	158	162
DLG1	2232.84	1303	1532	517	503	439.001	1173.24	1084.6	1086.04	1127	834.09	2576.93	1269.8	2224	919	1141.03	921.227	753.586	866.993	738.108	1286.21	1366.72	947.999	1009.12	1133	1218	4015.59	1466	3084.14	717.998	1348	3061.99	600.998	585	494.083	803	1050.41	1232	1148.72	1007	723	795.998	885.141	1295.79	1450.02	1625.99	1696.19	1798.67	699.003
RAB7A	13972	17485	15899	3698	3099	3947	10871	5860	6846	5900	7965	7206	4675	10036	8384	6084	7150	5031	6513	5800	6619	6312	5283	8555	8234	9036	16939	11473	14655	11269	12019	11801	4119	9651	13417	8531	13393	12472	15473	12023	5377	5132	12288	11008	15794	12734	10804	9315	8981
BCAP29	2560.91	3346.17	2037.6	692.768	552.612	595.991	1786.92	1366.24	1897.37	1661.57	1367.42	1666.45	1495.31	1628.99	1561.24	1415.26	1593.97	1748.4	2264.84	1556.29	1533.57	1495.99	982.366	1470.02	2084.74	2007.37	2731.97	2003.4	2613.08	1609.65	2011.93	1455.39	1184.99	1188.66	2369.18	963.609	1495.91	2497.19	4636.91	2665.01	1695.54	1195.72	2263.33	2542.97	4856.96	3527.43	2675.23	1863.97	1329.81
SEC31B	203.471	304.301	242.718	126.928	143	61	149.403	197.415	119.377	341.107	482.045	695.199	323.078	572.219	383.985	432.124	425.569	277.456	400.856	476.582	607.04	398.488	416.806	209.999	288.231	512.211	786.142	409.931	866.993	345.284	314.001	786.325	656.277	375.014	228.873	286.013	354.897	341.605	545.395	304.613	641.615	1038.62	432.296	809.044	515.335	1122.45	137.031	1058.7	439.84
SART3	1620.98	2089.91	2011.95	413.001	343.001	336.999	1326.99	853.999	1486.8	1002.99	1870.94	2022.99	640.928	1885.92	1701.71	1026.89	1767.98	572.897	895.001	966.962	1074.9	1288.95	593.999	778.999	1752.97	2992.66	3918.89	2922.96	3101.88	2059.98	2263	2202.97	749.797	1093.99	1613.97	1080.99	1517.94	1452.77	2461.97	2742.98	1649.94	1442.37	2596.95	3211.93	1755.92	1463.87	2749.99	2518.97	1593.96
ARHGAP15	26.999	18	81	7	59	3	1	1	0	10	0	1	10	4	3	23	5	7	7	5	15	2	13	33	1	0	7	1	0	2	2	2	1	0	0	0	0	6	3	0	18	12	0	1	5	8	4	1	0
TUBA3D	4	0	1	93.072	32.129	20.47	0	1	0	25.453	1	0	2	3	1.536	1.657	0	4	5	5	0	3.815	11	22	33.834	2	1	2	1.426	1	2	0	0	2	4	0	2	2	3.821	6	2.257	6	3	1	8	2	2	4	2
PAX2	11	1	2	1	12	1	0	0	1	3	2	4	3	3	5	6	6	4	6	1	4	8	3	0	1	4	12	2	3	10	1	1	5	1	0	2	4	1	4	4	13	15	5	5	6	5	6	0	1
EXOSC7	2423	2157	3433	979	741	871	5258	1499	1979	1416	1761	1925	1033	2243	1906	1196	1694	924	1210	1262	1570	1535	1160	2191	1802	2036	3903	3412	5079	3345	3881	3540	866	2448	2027	3974	4461	4808	2413	3871	1165	1619	3328	2851	2557	2370	3230	3166	2332
KIFAP3	1528	1849	1378	298	243	254	483	388	495	473	1049	570.001	416	1159	560.001	1072	1179	446.001	656.001	838	707	743	487	677	837	1680	1066	573.999	750.999	575	754	575	370	278	691	299	745.999	531	1226	1306	714	632	1256	941	1513	1756	632	1153	832
MKRN2	2928.79	3816.16	3161.46	666.879	546.652	804.951	1467.12	887.685	1495.89	1396.3	1911.48	2344.39	829.903	2199.09	2098.66	1177.69	2170.45	1025.44	1336.63	1387.05	1645.1	1642.37	1144.22	1480.3	1887.77	2617.15	4591.59	3168.48	4628.81	3099.08	2989.27	3786.03	771.669	1511.08	1983.03	1338.99	2882.14	2466.54	2180.24	3554.57	1551.77	1650.87	3085.43	3711.77	1936.38	1694.01	2949.01	3756.42	2243.97
MCM6	690.999	693	838	61	28	75	1710	361	2146	288	879	673	281	1350	763	716.001	1149	803	910	1006	1383	884	110	437	251	1549	3427	3861	2846	2796	2557	1527	235	209	439	344	1686	1937	920	2010	325	596	1819	2689	567	447	4411	1237	886
REXO2	22514.7	25319.7	28277.4	1314	1166	1536.83	3975.71	2530.86	3446.71	3440	2690.14	3217.29	2426	3430.88	2979.05	2108.36	2984.3	2102	2727.67	2464.76	2873	2830.59	1920	3968.99	2948.87	3089.8	7469.56	4594	6904.36	4443	5494	6724.65	1565.95	2922.88	4404.74	5317.84	6635	8271	5612	5974	2050.73	2602.96	4643.56	4623	5576.91	4581.84	5259.83	4712.37	3960
RBM7	2760.85	4368.26	3132.45	1147	771.27	1067.91	2319.01	1161.19	1157.62	1208.29	2061.89	1714.46	729.087	2237.76	1704.52	1455.74	1723.66	781.087	890.314	968.279	1258.18	1384.25	948.286	1303.56	2055.78	2195.66	3386.24	2185.51	3714.72	2490.41	3152.14	3288.8	691.122	2142.11	1822.7	1723.4	4017.27	2838.55	2224.1	3195.18	1550.8	1535.29	2954.26	3050.43	1746.4	1308.24	2095.21	3130.5	2536.89
RBMS2	2400.01	2538.55	3238.35	16.222	87.848	28.965	1338.84	932.803	1320.24	659.707	1720.96	3207.61	615.858	2369.36	1576.79	1621.12	1740.91	560.832	403.269	706.318	1669.35	1679.2	57.573	89.009	938.639	2255.45	5949.87	2126.85	4057.08	2188.31	2420.05	4935.98	110.442	558.414	206.845	1696.24	2232.5	2640.52	481.721	1597.82	549.525	1203.03	1952.83	3728.62	455.457	302.575	1769	4496.09	1926.83
BAZ2A	1351.78	738	1336.97	251.473	400.151	261.035	542.156	843.167	1170.53	1110.12	1102.84	1678.59	619.077	1462.37	938.071	1315.97	1377.29	592.126	632.644	854.08	1092.89	1150.43	808.427	934.991	1080.17	1156.72	2061.14	1338.55	1360.24	969.651	979.908	1943.2	719.557	652.584	899.085	654.364	730.924	1013.96	1745.96	1146.93	890.14	854.495	1151.54	1467.13	1841.53	1440.06	1204.74	2384.56	1237.72
PTPN23	978.907	1237.87	1288.57	257	264	267	271.978	496	890.999	705.155	1108.66	2250.69	639	1430.96	1393.51	895.05	1418	499.752	634.05	734.841	1167.4	1009.9	499	783	1243.43	1567.83	2817.95	1877.99	1669.32	1545	1217	1924.47	582.021	886	1141.69	937.001	1336	1237	1740.9	1745	485.645	606.051	1661.98	2052.07	2257.12	1317.67	1425	1474.06	1734.29
MLH1	1365	1987	1892	408.001	336.998	434.999	864	719.001	1573	1399	1467	1773	863.999	1878	1816	995	1839	1092	1399	1285	1533.08	1409	677.006	1125	1893	1811	3375	3146	2834	2713	2643	2227	685.001	1427	2068	991.002	2289	2262	2786	2865	903	1213	2513	2789	2517	2012	3397	2452	1911
UNG	852	1229	1038	849	652.999	702.001	1474	1414	2166	1640	2408	2697	986	2077	2222	1353	1987	1197	1499	1572	2184	1752	1123	1764	2850	2892	3288	3574	3393	3392	2869	2597	817	2498	1950	1579	3605	2996	2501	3297	1659	1544	3291	3598	1813	1688	3814	3253	2920
FMO4	200	326	155	1070	517	700	33	30	36	596	655	359	411	180	199.001	77	433.001	306	453	300	212	221	1179	1474	1504	417	98	152	182	309	301.999	118	413	473.999	593	189	379	169	1681	171	388	432	731	220	1561	945	224	331	757
KLHL20	1744	1509	1540	442	411	390.001	410	419	406	545	504.999	827	459	547	596	412.999	639	309	406	400	452	564	669	946	631	709	1426	785.001	1130	505	734.999	1009	399	410	648.999	250.001	493	536.001	1406	1104	417	482.001	628	878	1018	724	848	992.999	495
RGS11	272.164	198.125	128.648	5.934	16.389	2	2.07	7	4.082	15	5.99	5.536	21.772	9	10.104	17.226	5.061	3	5.091	2	9.007	8.599	0	1	1	5.039	19.65	6.07	6	17	9.496	5.012	4.011	5.326	1	4.002	4.001	4.424	11	6	9.106	20.295	10.287	10.471	2	19.625	7	13.64	12
SLC46A1	346.208	312.523	433.292	392.473	433.451	674.742	114.277	231.028	323.68	1496.58	1331.84	2729.82	910.204	809.56	2894.36	310.705	2236.51	1841.98	1485.45	2059.81	1660.2	2471.17	1409.88	1771.91	1731.16	1536.67	1816.4	1571.52	917.692	1038.49	1122.87	692.024	1192.08	2546.62	3907.62	668.653	970.241	1260.72	3308.06	1928.76	915.244	674.758	1703.14	1496.53	3239	1838.44	1715.96	1054.85	1648.25
PLXNA2	475	398.892	1046	201	254	317.552	465	631	1002	957.001	463	446	566	449.001	544.999	394	470	341	595	655	519.999	720	291	599	1189	960	782	669	500	385.999	492	779.263	436	298	569	197	255	460.999	1281	680.574	443	254.001	530	472	1381	1279	666.999	618.999	463.001
SPAG5	203	242	271.001	110	74	89	351.001	179	1056	105	523	587.979	77.001	1203	672.001	424	646	444.943	421.999	538	914.995	373.999	360	751	114.001	783	2410	2617	1511	1659	1311	1282	77.999	74.001	67.927	291	700.999	940.002	331.999	810.994	88	390.999	876	2080	338.861	147.001	3224	977	577
ANKRD13A	3834.74	4465.81	8745.49	192.223	255.708	275.39	970.759	418.476	429.287	448.84	330.801	386.289	214.279	376.381	292.664	269.616	259.902	204.518	243.876	284.277	316.556	345.077	634.598	678.553	680.349	346.311	707.748	507.537	908.403	347.598	758.858	604.103	232.909	573.842	471.334	417.81	592.746	564.954	566.01	572.728	367.3	334.799	591.495	487.164	774.437	496.585	555.342	606.676	429.512
TPD52	7	14.781	58	607.6	658.76	754.776	2609.36	2152.92	2356.88	1973.05	3553.93	2376.72	1951.19	4367.26	2576	2941.65	2484.9	2252	2920.52	3541.29	2754.68	2966.56	1465.73	2660.31	4136.15	6436.07	5162.12	5162.86	6844.99	5340.74	5789.21	6779.45	1072.75	2306.64	2813.59	2155.43	5284.29	3226.18	5340.63	2943.89	3097.32	3516.71	4968.37	4929.95	6429.12	3906.24	4808.08	6316.29	4251.93
ACACB	65	40	72.999	2208	2460	1826	174	157.999	138	2583	566	307.002	267	333	169	267.001	818	1803	1016	1176	860.999	537.999	4292	4406	2267	388	329	434	408.001	356	318	507.001	575	767	845.001	211	286	272.999	1424	271.999	612	541.078	400.001	317.001	1438	714	277	842.001	585.999
TRAF4	369.472	504.958	813.99	599.587	646.301	609.907	657.719	996.439	2109.5	1125.2	1232.61	1551.35	1097.5	1130.44	1678.3	1113.44	848.547	1351.48	1464.93	1540.2	1511.42	1718.56	643.48	674.331	2016.83	2223.98	2790.34	2103.55	2244.49	1929.84	2393.97	1879.3	650.509	1626.67	1976.24	1563.79	2354.03	1697	3386	3169.57	891.878	854.756	1985.2	2360.85	3026.15	1936.01	3251.73	1552	1672.43
PAG1	536	555	388	32	90	41	2214	1077	1081	2024	2474	291	697	1972	371	1357	1122	774	606	1082	1132	576	326	571	2847	1205	1097	685	1366	860	809	1366	896	2261	1759	2715	1625	1546	2020	1033	2605.99	2495	1287	920	2332	3152	852	2972	1664
GPATCH1	545	600	649	135	108	71	356	187	274	285	605	649.001	180.999	469	551	205	402.999	116.001	175	254	292	298	220	255	482.001	684	1007	831	1131	885.001	679	863	214	415	465	239.999	595	456	552	858	485	555	823.999	803	421	389.999	705.999	715.999	584
ICAM3	761.616	688.321	1068.9	3293.72	1859.58	2260.61	477.499	311.226	623.187	1480.77	1038.66	715.605	581.946	621.378	783.225	554.841	942.448	1293.55	1306.61	1101.83	1201.83	745.653	2809.26	3248.78	1381.39	962.089	729.653	875.687	676.308	912.847	1330.96	573.498	553.79	1247.22	1419.89	912.474	1526.72	888.185	2079.22	1034.77	728.316	569.78	1347.18	555.532	3041.71	1507.06	943.125	501.735	1324.79
NT5C2	2276.67	5225.24	2835.73	342.387	255.498	513.484	1389.07	1720.2	2175.68	1060.63	2400.19	5607.58	1270.76	4022.06	3884.65	2307.4	2794.86	1470.53	1739.72	2070.49	2051.99	2158.4	671.767	1109.47	1572.64	6055.04	10652.5	4136.18	3556.49	1829.42	1862.51	2859.71	628.898	673.641	998.724	543.713	1183.55	1195.3	3613.96	4014.57	1476.57	1521.55	2547.22	5375.24	2893.81	1955.71	4753.74	2445.49	1450.3
MCAM	984.813	689.781	1636.74	12	41	16.001	58	1037	819.999	250	1010	1498	1233.52	3728	1123	2282.74	1091	1034.68	821.849	1562	1383	602	4	128	152	899	24445.5	991.001	6191.63	892.999	675	6235.93	5	901.999	38	2878	1909	4324.96	297.81	1593.62	226.999	430.001	757	4804	59.04	132.538	971	3095.11	2095.35
GPC4	526	1381	417	0	11	1	143	106	123	3	5	1	20	74	45	209	9	21	79	12	12	2	2	6	4	35	339	4	11	0	1	45	1	1	3	2	1	35	33	2	1	1	4	6	0	8	19	7	9
MBNL3	119	50	151	1604	1957	1204	213	254	534.999	1194	1483	3104	989	1209	1126	704.001	1791	927	909.999	783.001	1600	2149	3142	1848	974	1150	1932	3445	3679	2194	3087	2773	413	2177	746.001	1427	2182	2125	1690	972.002	621.001	488.999	1965	3155	1506	1109	1464	2473	1361
CAMSAP3	3	2	9	465	534	229	136	121	300	616.999	209.999	264.999	325	162	182	166	224.001	168	458	297	226.999	309.999	516	646	731	196	240.001	364	459	301	584	300.999	346.999	247	317.999	233	323	289.001	793.999	371	239	227.001	385	313	1206	524	697.001	384	281
RAP1GAP	4	2	28	213	234	424.002	406	718.001	1254	899.001	927.001	346.999	720.001	1686	514.999	949	948	1087	1418	1509	1335	721.999	657	762.999	1076	1105	567.999	961	646.999	561	551	533.001	678.001	403.999	2226	640	700	703	3242	731.999	1436	705	1041	552.999	3326	2681	586	884	695.001
XAB2	364	622	2384	303	612	534	230	509	845	711	633	675	196	1524	1267	694	1227	466.001	543	581	944	990	366	1059	1085	821	1221	1326	1481	1237	946	1503	233	1264	870.001	1560	1368	1130	1154	2190	962	1095	1980	1938	1244	766.999	1725	2110	1703
ARHGEF1	1029	1079	1879	331	431	317.001	248	667.999	1559	1553	1670	1346	657	1512	1478	1538	1845	670.001	1081	1366	1926	1749	528	864	1647	1848	2272	1494	744	924	734.999	1019	474	382.999	742.999	529	641.001	804	989.999	1227	1476	1248	1321	1803	867.999	848.001	1799	2174	1560
STXBP2	770.397	2986.49	2058.77	768.338	563.002	616.959	664	2513	4334	2487.08	3390.85	3244.61	1637	4559.58	2557	3528.09	2523.94	1314	1915	1964	2506.6	2013.52	598	1291	3557.32	5046	7886.63	3713.97	2467.51	3408.34	1667.11	4024.78	1182	1738.65	2626	1201	1991.16	2124.77	2899.56	3039.51	1851.03	1776.03	3560.5	3692.76	3989	2764.59	2643.56	4119.1	3777.48
MAP2K7	654.568	325.34	492.955	285	454.187	220.128	153	221	352.248	377.113	308.327	360.264	245.943	318.092	316.905	318.664	260	217.545	302.961	324.655	466.319	375.89	520.55	641.429	562.986	455.783	676.776	670.999	924.29	607.29	664	878.878	364.979	546	616.969	810	801.871	763.13	572.16	608	395.012	383.417	581	691.084	906.326	498.517	425.638	805.996	669
NMRK2	2	0	3	0	0	0	0	0	1	0	0	0	0	0	1	0	0	0	0	1	0	0	0	0	0	0	3	0	0	1	0	0	0	0	0	0	2	0	0	0	1	0	0	0	2	0	1	1	0
DGKD	540	266	492	141	231.001	217	462	334	630.001	781	552	425.998	422.999	699.999	383.999	418.999	466	439	737	721.999	606	614	419	504.001	691	648	960	753	1454	422	524	1317	613	455.001	668.001	624	452	641	1201	1245	612.999	731	565	745	1400	1076	985	2210	615.001
CTTNBP2	4	1	12	15	31	13	37	68	53	172	89	353	249.999	199	537	381.001	141	82	117	82.999	58	243	63	22	72	134	195	23	134	40	76	260	84	153	59	132	194.999	214	125	7	17	28	241	189	93	89	6	165	70
ACTL6B	0	0	0	0	0	0	1	0	0	0	2	0	4	1	5	1	2	2	1	0	2	2	0	0	1	0	2	0	0	1	0	1	1	0	0	0	0	0	1	0	3	2	0	2	1	0	0	0	1
RARB	1129	1184	1658	46	62	124.001	473	388	481	15	261.999	2005	152.001	482.999	1027	142	34	81	46	52.999	24.999	44	75	77	10	389.999	2400	49	179.001	261	385	542	11	8	3	62	141	12	31	132	16	34	220.999	125.999	46	58	17	51	52
TOP2B	2533	755.998	3365	736.999	765.999	670	1934	791	985.001	850	651	443	489	895.999	409.999	688	711.002	311.136	553.094	526	708	1008	1256	1423	831.997	514	815.999	885	1645	591.001	1459	876.001	432.999	376	457.001	542.999	724.999	824.001	904.002	894	541.999	580.998	803.001	642	800	624.999	967	1083	593.001
TM9SF3	8236	2616	5942	2021	1758	1637	11554	6542	6969	4586	2610	2514	2924	3634	2105	3597	2540	2262	3134	3069	2367	4468	3553	5759	5881	4037	4847	3052	4655	1931	5691	3846	1701	1646	2591	1919	2445	3195	6166	2962	1986	1533	3243	2612	7243	5300	3438	4312	2520
NFKB2	265	91	317.001	140.999	171	144	247	284	345	379.001	310	264.999	270.001	409.999	214.275	259	240	245	379.999	244.002	281.999	258.999	301	426	685.001	286.999	700.992	449	858.999	411	742.001	1088	308	416.001	607	768	702	687.999	589	443.999	452	306.001	563.994	446.001	710.999	474	473.001	849.001	554
UBE2T	546	438.999	539	21	9	7	2644	535	2174	145	808	957	298	1712	994	649.999	919.999	758.001	738	776.001	1214	852.001	35	288	112.999	728	2418	2401	2396	2634	2307	1843	110	397	270.999	1346	2247	2481	334	1494	199	702.999	1404	1596	317	349	3736	1323	999.999
PPP1R12B	1631.23	1761.57	1515.82	85.44	158.905	119.001	298.953	341.921	371.954	472.596	564.421	570.001	261.963	696.389	341.303	381.925	280.983	189.565	240.368	288.835	330.952	466.887	369.522	427.905	518.966	637.63	1047.37	578.5	867.218	518.161	425.806	1282.44	339.596	408	403.387	481.964	518.808	452.462	815.255	452.472	431.295	590.114	527.215	538.252	754.316	1055.15	409.493	1322.71	617.85
DNAJC10	5756.17	7955.01	4964	326	459.001	334.002	3550	4502	6050	2583	3010	5176	2934	5807	3592	3763	3782.75	2546	3128	3211	3239	3044	1162	1594	2998	5135	10212	2760	3744	2101	2758	3989	1542	1074	1348	1854	2249	2461	4496	4005	2150	2424	2897	4603	2768	3225	4586	3358	2113
GTF3C1	2047	1975	3077	516	660.001	560.999	490.999	977	2093	1632	2186	3572	1424	2307	1749	1697	3310	1317	1729	2101	2715	2404	1128	1572	1706	2276	3816	2543	2015	1502	1352	2231	959.001	818.001	1720	750.001	1073	1412	2801	2851	1244	1303	2012	2742	2995	2850	2887	2632	1805
IL4R	1205	1171.85	1964	1408	911	1437	507	349.999	395.001	851	598	268.969	279	710.999	279.01	702.001	504	371.999	556.011	743.971	525	411	1904	2017	1638	441.001	792.999	451	539.999	424.953	661	614	512.999	500	904.799	441	473	531.999	858.001	354.865	709.491	351.896	512.001	416.429	1240.84	987	307	930.343	637.999
USP33	1976	2920	1728	368	343	313.001	998	1638	2292	1001	1798	2676	853.001	2177	1620	1489	1888	871.001	1035	1156	1298	1292	630	882	1340	2569	2358	1078	1565	823	901.999	1637	567.999	653	548	592.001	842	752.999	2505	1326	1405	1581	1026	1361	2418	1619.63	2485	1266	843
PAK3	1	0	5	1	7	6	1	0	6	53	15	4	20	25	11	15	18	16	6.077	9	16	18	7	9	22	7	30	6	30	11	13	6	12	29	7	53	47	75	15	15	25	25	18.439	26	8	3	24	30	31
CAPN6	1	1	2	3	3	1	14	265	77	190	766	270	433	2055	157	2594	414	103	287	258	169	183	0	12	2639	4975	4274	260	761	764	588	1044	7	300	37	279	510	1291	154	34	98	20	681	4630	121	92	15	357	610
DCX	1	0	0	1	5	4	1	4	5	139	27	8	45	7	15	22	54	60	49	49	22	51	1	16	143.999	74	11	5	0	10	10	2	22	13	18	4	11	8	60	2	13	11	18	5	139	74	7	6	23
SNRPA	1041	961.988	2005	275	262	262.999	496	722	1911	898.999	1239	1341.99	479.999	2143	1421.99	1267	1482	733.001	878	1070	1776.99	1373	421.001	825.001	843	1330	2718.99	2914	2445	2133	1475	1963	622	494	1206	950	1615	1957	1088	987.907	784.999	1065	1700	2049	997	1027	2570	2798	1404
SPAG6	0	0	0	0	0	0	0	2	2	0	16	7	21	5	4	7.001	3	0	9	2	1	4	0	1	7	8.999	5	7	25	7	13	13	2	9	1	27	20	9	2	6	3	3	32	34	2	4	0	10	13
EXOSC5	1025	971	1643	1047	733.001	869	614	476	1052	832	1319	1183	461	1080	1270	450.001	1313	507	651	895	1078	1175	697	2187	904	1167	2116	2050	1834	1654.18	1545	1009	406	932	1923	1214	2047	2196	1147	2277	569	570	1815	1561	1211	765.001	2318	1074	1609.37
DYNC1I2	6875.97	4903.55	6991.41	632.923	593.783	621.89	4953.56	2459.55	2376.32	2067.46	2258.29	1875.68	1534.43	3254.52	1743.73	2540.09	1549.45	945.758	1367.73	1322.63	1489.84	1731.37	984.999	1775.95	2144.79	2407.7	4376.21	2536.47	5206.97	3427.27	4284.61	4051.46	803.89	1988.77	2481.64	2349.61	4546.14	3844.94	2753.49	3298.58	1234.58	1598.74	3196.9	3540.42	3297.53	3038.91	1992.91	3063.65	2404.63
APBB1IP	0	3	21	230	139	191	3	51	176	556	406	733	352	385	388.391	216	344	682	704	608	542	458	298	371	503	500	1087	745	1101	557	286	1253	276	227	213	204	252	317	1239	783	382	464	625	932	1113	1403	607	1256	690
LRCH4	190.399	267.848	376.486	126.027	270.954	85.086	108.652	290.169	553.42	355.219	241.675	434.232	450.201	283.774	255.013	432.279	144.435	317.049	457.6	428.633	467.663	449.81	138.564	240.449	472.939	554.532	682.567	337.725	263.897	161.12	207.608	584.119	232.607	139.81	224.038	107.3	150.684	168.519	571.181	408.206	234.984	276.383	222.151	380.762	843.435	545.776	559.486	454.645	324.335
FAM76B	536.001	336.999	314	250.001	289	177	417.001	185	238	267.001	248	195	171.001	334.001	189.001	243.999	201	102	142	151	229.001	279	631.999	507	620.001	283.998	427.999	323	706.999	275	396	315.999	223	220.999	170	260.001	359.001	280.999	303.001	413.999	275	446	335.999	401.001	344	358	426.999	549.002	249.999
SIRT6	216.001	612	504	94	102	133	119	375	878	651.001	1004	1215	491.999	999	990.998	681.001	767.002	484.001	647.001	660	890	776.999	159	306.001	766.999	919	1308	1183	599.999	865.001	435	750	307.001	375.001	623	301	457	485.999	1256	1307	452.999	554	883.999	1069	1316	766.001	1379	1003	818
TYR	0	0	0	0	0	0	0	0	0	2	0	0	2	0	0	0	0	1	1	0	3	1	0	1	0	0	0	0	0	0	1	0	0	0	0	0	0	1	1	1	0	1	0	0	0	0	0	0	1
POLD3	614.001	1056	458	128.999	88.001	153	948	547.001	1537	192	490	437	118	623.128	493	327	516	199	239.999	405	450	371	208	364	332.001	648.999	1173	1247	1001	1032	844.999	728	85	156	153	218.999	459.999	519	181	742	195.001	433	800.001	1068	116	141	1083	603.999	414
ACTN2	59.999	12	209	12	15	5.999	3	0	2	30.999	20	18	24.999	9	11	25.001	10.001	9.001	20	14	10	13	6	21.001	15	5	15	7	16	14	5	18	8	5	1	5	8	8	17	2	25.999	24	16	11	18	19	1	16	12
CAPZB	4655	6502.05	8012.01	943	1005	884.001	1078	2056	4769	3678	3001	5022	3158	3826	4156	3733	2973	3414	3951	3756	5222	4264	1327	2153	3453	3740	6571	5153	3698	2656	2011	3324	1453	861	1814	985	1610	2242	5561	3594	2510.07	2817	2498	4162	8151.01	6152.92	7929	5503	3090
GPR137B	450	121	396	162	152	208	286	156	107	286	130	96	422	122	100	169	149	168	525	159	147	201	131	349	409	102	127	119	217	117	336.999	147	216	97	284	167.999	224	225	673.999	196	219	92	225	120	840	598	303	228	200
NAALAD2	12	22	37	2	2	4	9	12	9	12	4	16	5.066	6.999	3	20	3	5	13	8	8	9	4	13	5	8	32	43	64	46	16	139.001	8	2	0	3	14	29	54	8	5	9	13	168.999	106	14.036	12	12	4
JADE1	4201.8	3375.64	1675.68	743.955	815.899	736.831	592.614	457	844.769	797.295	908.994	824.343	200.834	1425.41	780.212	388.001	892.478	434.804	385.834	512.877	779.528	737.698	1022.94	1023.9	898.767	1016.71	2948.51	1496.44	3767.51	1168.63	882.543	3231.01	268.87	673.988	635.102	912.93	876.876	1391.64	1182.81	1789.86	607.915	836.734	996.983	2520.21	789.891	316.735	2410.86	2986.25	740.951
SLC25A43	728	194.999	750.999	72	73	77	125	40	63	706	97	43	322	56	71	60	75	322	755	295	119.001	205	182	454	1211	197	100	206	320	180	276	146	459	134	299	165	183	216	1232	209	535	253	188	139	1596	1417	1004	509	290
UBE2A	3522.1	6573.38	5186	722.001	445	480	2588	2326	3037.13	1950	2523	3606.32	2113.59	3397	2698.56	2232	2894	2242	2526	2199	2702	2411.74	812.999	1487	2585	3440	5806	4268.12	4967.17	3909	3858	3941.42	1137.78	3073.06	3652	2974	4255	4287.2	5346.54	7306.25	1293	1430	4221.27	4426.17	6022.5	4121	5474.48	2836.34	2898.13
FGFR1	2288.43	1629.01	2834.27	26	193.999	24	356	735.134	1379.33	1301.89	2434.9	1932.54	1779.54	1889.15	1761.74	1706.82	2641.59	282.048	653.591	970.4	1806.01	3970.85	24	112	2259.29	2644	3395.11	6660	2711.3	2911	4836.15	2832	85.998	1076.11	555.695	2036.05	3750.01	3109	417.001	1792	1665.1	1683.09	5493	4409	282.999	398.002	3619	3518.78	3233
FKBP6	0	2	2	3	7	2	2	1	0	5.997	8.031	3	12	5	4	19.843	2	4.006	9.006	6.009	18.147	1	1	6	3.002	3	6.45	3	1	8	1	3.115	6	2	5	0	4	3	0	1	17	14.008	3.003	6.028	4.175	10.926	0	4	5
SMC1B	1	1	0	2	1	0	76	4	1	0	2	6	5	7	2	1	4	0	7	1	3	5	2	8	2	2	6	9	18	43	20	23	3	9	2	14	30	37	1	7	8	12	10	15	3	2	5	21	13
FBLN1	9763	704.999	2303	4	16	0	14	37	38	275	221	91	19	145	159	25	94	33	49	88.001	244.999	63.001	3	92	99	837	6580	256	1335	527	343	8104	8	145	11	518	524	916.001	23	302	166.001	196	292	4356	18	24	341	1237	710.999
ITGA8	1496	450	782	1	8	0	1	0	1	6	1	0	11.092	3	2	8	1	3	11	6	3	4	3	4	1	0	0	4	1	1	3	1	0	0	0	3	1	5	12	2	13	9	2	5	2	6	1	0	3
CST7	1	0	2	6	11	6	0	0	0	0	1	1	0	3	0	1	0	0	0	0	0	0	3	13	0	0	4	0	3	0	0	0	1	0	1	0	0	0	1	1	0	0	0	0	1	0	0	0	0
MAP2	308	383.999	752.999	4	31	2	30	280	167	1299	388	1571	1219	2165	481	1855	748	1404	809	652	483	817	9	27	323.999	1352	3024	232	522	248.001	291	1762	175	85	536	251.001	176	693	1588	95.999	80	84.001	130	398	1536	1977	457	173	214
PIAS2	629	319.999	656	206	240.999	186	581.001	354	364	934.999	560	283.001	670	684.999	398	589.001	301.937	453	815.001	694.999	628	616.001	405.001	645	1634	630	552	592.453	1362	562.001	671.001	1027	625.999	317	434	475	765	707	1640	730	1360	1574	627.001	873.999	1692	1414.46	1546	1576	757.001
AMPH	94	380	167	3	2	0	0	0	9	5	1	0	8	11	6	11	4	4	9	9	5	5	0	3	0	6	74	2	17	3	0	32	2	0	0	1	1	9	2	8	5	8	1	45	1	2	4	96.999	3
ARAF	1033	3647	2739	1623	1623	1493	462	1234	2295	2415	3239	3668	1404	3388	2911	1985	3264	2035	2428	2455	2835	2548	2414	3266	3122	3588	5144	3602	2142	2693	1642	2897	1311	1573	3046	1060	1815	1995	4681	3542	1555	1488	3281	3560	4670	3302	3122	3176	2779
MCCC1	1586	2914	3247	1393	1035	1130	1961	1178	1768	2888	3138	3893	1203	3423	2950	1351.99	3150	1799	1952	2156	2607	2255	1906	2464	3684	4407	6783	3970	4260	4040	3739	2927	1198	3593	2912	1571	5978	4050	4672	3726	2314	2879	5400	5358	5270	3970	4556	5079	4083
LAMP3	5	6	3.095	1	4	2	34	30	153	58	73.999	313	34.001	189	374	67	141.999	57	73.001	89	75	130.87	1	14	159	308.001	612	214	92	221	199	484	6	61	66	19	72	74	90	47	32	27	102	103	41	22	269	62.001	61
FAP	14527.7	12969.4	7851	2	2	3	0	4	0	18.959	9.994	3.49	39.644	4	6	14.857	1	2	4.993	17.852	0	13.974	1	10.386	16.265	16.943	58.974	6	2	0	3	0	9.042	2	0	1	8	136.872	7.922	1	4.987	3	2	0	8.116	20.781	12	6	7.72
NEBL	16	5	14	61	71	45	1079	317.999	249.001	215.998	127.001	96	109	306.999	45.999	390	70	27	68	54	104.999	83	135	51.001	331.999	101.002	419.001	185	1139	151	197	878.899	24	415	336	311.001	207	416.999	35	109	152	111.999	105.999	298	35	91	152	846	128.001
ACER3	694	911.001	905.594	93	72.999	31.235	887.001	525.001	908	443.001	616.025	1242	759.001	658.999	774	1014.96	616.001	734.001	882.19	704.876	684.999	671	138	297	641.002	1272	1309.88	523	399	286.001	492	338.001	301.001	246.999	466.999	189.001	442.001	535	1538	597	308.999	295	444	399.001	1955.15	1551	1302	300.001	273.001
UBE2K	3388	3174	4046	1846	1445	1253	3289	1876	2606	2946	2485	3187	2288	2693	2331	2003	2848	2406	2632	2525	3022	2631	2279	4667	3041	3217	4725	4393	4977	3435	4544	3263	1617	2666	5261	2513	3952	4381	5826	6824	1567	1215	3738	3451	6977	5004	5296	2799	2603
PIK3C3	1646	3170	1927	389.999	264.001	351.001	1002	701	809	702.001	1288	1428	637.999	1472	1356	921	1513	583.999	761.999	856	1095	1122	463	810.999	839	1783	2420	1598	2334	1213	1581	1761	491	570.001	999.026	484	921	900	1666	2126	1088	1210	1903.24	2203	1221	1089	1031	2018	1137
N4BP2	247	58	160	276	330	311	77	48	71	129	108	73	74	94	50	92	92	66	62	95.999	94	92	590	795	213	126	147	104	203	168	142	136	119	160.001	128	115	131	131.001	274	102	114	117	115	210	110	142	59	193	121
TIGAR	970.25	1231.8	1047.42	15.358	72.283	81	952.916	587.739	875.606	666.796	424.167	1719.72	511.423	816.311	1466.02	394.915	773.475	572.802	648.812	518.495	727.515	884.654	116	463	1020.21	1376.11	2513.89	1557.23	1309.2	844.575	1774.82	1195.25	277.885	311.465	602.16	383.798	792.087	786.547	1475.98	2289.61	175.12	306.357	1300.07	1065.75	1734.57	1338.14	2151.11	1011.78	1195.59
TULP3	2045	2753	2798.01	51	75	124	765	595	814	705	1351	880	356.999	1592.01	676	977	1163	311	464	568.001	859.006	598.008	217	383	1037	1355	2974.01	2002	2569	2311	1394	2945	415	958.001	900.002	1008	1512	1587	871.006	1654	1083	1110	1601	2398	826	647	1471	3034	1515
SYNJ2	2965	1361	2909	46	94	67	916	511	682	472.001	625	583	444.001	973.001	455.999	721.483	477	225	343	519	557	751.043	159	250.999	991.001	537	691.999	1036	734.001	764	1202	813	101	227	242.999	472	752	514	408	632.001	329	499.999	966	495	567.999	447.001	835	561.999	686.989
ADCY2	10	4	12	12	12	3	1	0	2	8	9	12.036	19	12	5	65	12	18.055	15	15.087	16	7	10	13	12	3	18	7	2	8.068	6	6	6	2	2	6	2	3	3	4	28	18	7	6	6	15	1	6	12
PPP2R5C	3441	4092.99	3650.96	1268	1295	1133	3400.99	1996	2348.99	1821	2375	2243.99	1238	3268.97	1759	2242.99	2191	1503	1859.2	1633	2062	1872	1828.98	2199	2435	2454	4094	2711	4586	2561	3132.99	3135	1018.99	1942	2137	2233	3048	3184	2702.99	2527.3	2209.99	2160.99	2673	2936	2506	2040.99	2560	3787	2243
PMS2P1	0	0	0	0	0	0	0	0	0	0	0	0	0	0	0	0	0	0	0	0	0	0	0	0	0	0	0	0	0	0	0	0	0	0	0	0	0	0	0	0	0	0	0	0	0	0	0	0	0
RBFOX1	17.001	2	6	3	18.001	3	1	2	2	15.003	10.008	4	18	13	6.017	44	12	7.007	16.741	14	18	10	1	16	4	2	7.013	8	4	6	2	0	5	1	2	1	0	2	2	0	45	23	10	4	4	25	1	10	6
GNB1	8742	4632	11312	1488.24	1307	1256	4442	3119	3033	3814	2810	2749	2836	3668	2117	2942	2314	1832	2703	2214	2806	2896	2307	4166	5464	2838	5205	4571	9148.63	4121	7224	7618	1705	3128	3538	6062	6251	7319	5597	4585	2269.47	2021	4332	4721.64	7674	5489	4446	6436.07	3590
HOXA9	3	5	1	1	0	0	0	0	0	0	3	0	0	1	5	1	1	4	4	0	1	0	0	1	0	2	3	4	1	3	1	0	1	0	0	1	1	0	0	0	4	2	1	0	3	3	1	0	2
EDN1	575	1659	1019	7	19	7	2307	2563	2491	1242	2708	3748	1159	6118	2694	1505	3275	495	392	534	3224	4316	32	83	679	5293	21533	2388	9994	5366	3639	19741	27	738	91	4854	5185	4802	183	4468	402	2617	5373	9748	51	64	2107	10158	5049
MLLT10	904	303	1087	237	290.999	234.001	388.999	218.002	257.999	573.999	392.001	326.999	272.122	415	191	345	262	206	262	285.998	360	534.001	705	698	714.001	367.001	552	477	976.001	418.999	670	522.999	367.001	352.999	382.999	360	526.999	517.999	499	455	381	375	444.008	528	654	819	460.999	1017	462.998
ZCWPW1	131.909	107.1	166.92	154.993	248.988	211.993	37.034	21.947	30.983	113.586	81.995	65.996	81.998	56.097	81.001	30.992	68.163	79.001	65.001	51.041	72.001	62.008	413.999	319.996	121.983	57.001	60.894	54.476	66	50.996	62.001	31.209	85.998	122.999	231	63.999	84.999	63.001	173.178	60.27	51.991	57	83.908	58.012	179.154	93.973	45.128	55.14	69.741
ADCYAP1R1	4	1	3	2	11	2	0	0	3	7	8	1	3	10	1	9	2	4	6	5	4	2	0	0	4	3	8	2	6	9	0	5	6	1	0	1	7	7	7	5	19	15	10	17	3	1	2	10	8
FGF20	4	0	2	1	3	0	0	0	2	0	1	0	5	0	1	5	1	2	5	3	2	3	1	0	0	1	8	0	0	5	0	2	1	0	3	0	0	1	0	1	0	3	1	1	1	1	0	2	0
P2RY10	0	0	0	1	1	2	0	5	0	5	2	3	12	0	3	10	3	3	1	4	4	4	1	2	0	0	1	0	1	1	0	1	0	0	0	0	0	0	1	1	2	0	0	0	3	1	2	3	1
ITM2A	1	7	67	5	23	14	112	77	456.999	113	250	70.999	505	67	46	10	98	61	34	177	38	30	6	33	26	95	304	6	98	18	115	614	0	11	0	73	113	37.999	9	9	2	4	18	87	6	25	12	106	16
NRDC	5321.45	10147.7	7054.43	1569.86	1423.23	1544.23	3649.43	3088.99	4421.84	5405.93	6721.4	6655.51	2601.6	8073.03	5982.6	3584.56	7309.28	4122.92	4769.31	4947.71	6131.61	5297.42	2837.84	4061.43	6485.65	9480.97	15527.7	8529.98	9826.65	5112.95	5359.89	8521.69	3502.93	4380.9	4804.78	4311.84	5134.93	5671.72	8775.11	7333.91	6411.39	6977.17	7295.91	10529.9	8034.12	7811.6	10107.9	10814.7	5546.88
VDAC3	5499	7922	7834	2013	1159	1512	11923	4266	6962	4555.99	5573	5977	3679	7311	5881	4198	5471	4237	5020	4275.99	5376	4796	2498	4384	5308	7090	12048	10824	13105	10668	11616	8786	2980	6783	7670	7899	12703	15115	11215	14163	3757	4682	9952	9565	11134	9093	14888	8494	7416
PCM1	3329	1853	3523	1246	997	991	2041	922.999	1159	1702	2030	1918	1055	2446	1245	1575	1987	841.999	1204	1561	1958	2042	1628	3822	1748	1239	2345	2625	3416	2226	2839.15	2082	888.001	1910	1275	1887	2204	2662	1854	1997	1796	1811	2163	2236	1734	1712	2284	3122	2083
TNRC6C	703.963	288.801	586.997	200	252.859	179.977	296.382	230.531	264.759	236.268	137.984	213.149	156.799	166.248	137.502	174.595	205.218	119.634	164.734	172.752	213.498	223.237	669.993	398.963	235.875	139.001	318.543	326.575	397.954	178.003	293.607	233.864	196	297.222	238.762	208.701	248.028	309.926	621.877	486.339	132.364	141.346	180.311	245.259	700.501	425.617	392.582	240.836	204.605
CBFA2T2	438	207	439.999	77	82	86	358	206	191	305	264	278	214	309.284	181	292.999	270.001	162	224.999	205	256.001	286.999	369.001	426	522	234	407	332	630	331.999	448	688	323	488	349	459.999	391	417	490	387	338.999	310.74	367	415	616.001	474.001	361	827	370.96
BRINP1	6	3	12	0	4	1	1	1	7	8	19	52	23	9	66	8	131	12	5	15	32	16	2	7	1	80	102	41	62	61	96	22	12	68	16	34	154	221	17	82	14	12	30	106	36	47	45	27	50
ITCH	389.628	431.051	458.341	623.346	629.54	655.449	308.415	344.058	386.231	696.057	495.196	778.209	457.904	556.138	398.834	572.025	774.689	471.839	709.085	816.315	699.979	496.98	949.056	813.786	787.358	594.496	885.675	542.271	720.702	490.229	416.027	871.772	374.078	305.275	571.464	262.898	307.056	246.318	931.32	733.738	616.639	474.604	474.492	588.002	810.974	929.691	678.577	722.278	411.619
PKD2L2	2.929	4	7.966	0	2	0	1.02	0	0	6	0	3	2.964	1	1	1.469	2	9.419	3.624	0	5.206	7.453	2	0	1	1	1	6	10.229	4	2	2.032	7	2	3	0	2	1	4.187	0	7.202	3	2	1	3.855	3	2	2	3
TP53INP2	641	942	1000	666	593	939	361	677	593	832	806	1047	825	765	604	780	649	1504	1405	815	815	364	578	871	1922	1115	1361	460	486	443	367	677	796	384	1253	376	380	556	2683	626	555	636	725	1004	4058	2828	506	1075	822
SDF4	2410	3051	4352	972	1172	688.001	743	1101	1625	13445	1457	2119	9881	1314	2399	1034	1663	3734	13011	6935	1894	3152	2895	5726	15640	2881	3299	2878	2247	1953	2185	2116	6338	1902	2697	1905	2497	2230	19884	2898	7204	4793	3027	2595	28572	8918	13493	3123	2985
MYH7B	7	3	5	17	34.999	17	3	7	1	15	7	3	7	18	10	16	12	6	5	6	11	4.184	58.001	24	21	10	8	9	10	8	9	25	11	23	12	18	24	8	9	8	35	42	13	10.775	47.001	12	3	34	18
BPIFB2	0	0	0	13	0	5	0	3	3	23	242	29	6	114	18	20	73	10	5	36	41	11	7	70	433	19	3	0	3	0	6	3	16	86	135	45	18	11	24	14	78	63	636	7	3	0	2	2	33
TP73	6.716	2.177	2.117	5.882	14.936	7.872	24.085	7.097	66.588	10.289	22.242	15.673	17.004	38.494	24.896	24.008	33.31	14.093	29.031	31.652	46.203	46.985	12.982	50.783	16.961	49.613	68.192	56.422	28.191	41.411	25.026	30.934	25.145	22.669	10.809	25.515	44.796	37.577	54.843	36.913	30.983	34.098	52.894	34.008	21.43	12	187.623	38.474	60.479
TOLLIP	1653	3901	4094	4947	4084	4474	1057	2696	4501	5649	8183	10494	4884	7703	8390	3740	9157	5115	5590	6614	6434	7031	5861	8254	8430	11506	12479	9930	6900	7834	6265	7089	3858	7066	9760	5868	7486	7205	14892	9764	5148	4105	12519	9068	16366	10720	9276	7237	8916
UBE2D4	941.076	942.442	1481.82	379.747	377.043	347.722	499.724	313.514	827.967	1093.72	591.142	798.013	933.585	539.056	1027.88	324.233	495.13	1264.96	1421.21	1162.63	1039.34	1415.76	1079.45	1145.86	1220.73	1441.6	998.228	1411.56	1413.69	1040.51	1536.45	831.724	550.932	1102.64	1216.51	909.471	1727.92	1073.51	2691.59	1995.59	708	581.889	943.294	1065.81	2885.69	1953.13	3130.78	955.497	943.817
CLUL1	4	2	0	1	6	2	22	9	3	10.003	10	12	15.722	8	17.679	16.999	17	8	9.999	8	5.957	16	0	0	9	9	21.014	15	14	9	13	16	2	8	1	9	10	5	6	5	6	8	8	6.001	6	0	2	8	11
RUNX1T1	1428	1526	1438	6	23	4	0	0	3.999	9	6	3	29	7	13	53	8	19	29	17	17	10	3	25	13.001	4	14	3	4	3	2	0	12.999	2	0	2	1	8	20	1	29	23	3	7	9	18	8	3	7
CDH17	2	1	0	3	1	0	11650	5449	4513	25	100	1173	5	142	5151	20	30	10	5	67	16	18	0	0	148	5259	62	115	169	99	123	160	1	1	4	6	9	47	37	10	18	0	19	3	58	173	49	129	15
THOC1	1203.56	977.078	789.998	185.734	182.018	250.335	1236.68	343.998	788.339	401.597	881.353	1090.7	258.153	948.414	945.642	529.117	793.387	371.376	402.628	468	845.001	711.749	458.999	561.621	644.437	1236	2104.22	2215.85	2654.54	2139.4	2292.01	1501.48	411.999	1243.84	754.469	727.362	2324.72	2013.93	1045	2680.75	792.556	1343.18	1933.68	2030.24	613.199	638.444	1898.71	1425.59	1423.02
[truncated: 61,792 more rows]
[truncated: 52 more columns]

## Sheet: S3_DEGs MM+WntS+TRULIvs PHHs
Supplementary Dataset 2_S3 - DEGs between MM+WtnS+TRULI and Primary (fresh isolated PHHs). Related to Extended Data Fig. 2
[truncated: 30,742 more rows]

[truncated: 8 more sheets: S4_GSEA KEGG_W+TRULIvs Primary, S5_GSEA_REACT_W+TRULIvs Primary, S6_publicly available gene list, S7_DEGs_DMvsEM, S8_GSEA KEGG_DMvsEM, S9_GSEA REACTOME_DMvsEM, S10_GSEA GO_TERMS_DMvsEM, S11_Donor specific genes]
