# Supplementary material for: Human assembloids recapitulate periportal liver tissue in vitro
Source: Research Square preprint supplement (doi:10.21203/rs.3.rs-5314788/v1), 2025-09-17
Supplement: Supplementary file 2 [file 446c51d892e29b46a1e6d5d8.xlsx]

## Sheet: Table S2_Donors used, culture
Supplementary Table S2: List of patients/donors under EM1 or EM2 culture conditions. Organoid formation and expansion potential are indicated. Note that for some donors used for the growth expansion graph we also indicate the passage number reached.
												Summary of the results
	Identifier	Gender	Age	Diagnosis*	Isolation metastasishod	Viability	Hepatocyte Organoid formation	Medium	Passage >3	Used in long term expansion
	PHH12	M	47	Unclear liver tumor	Perfusion	0.77	Yes	EM1: MM + Wnt S + TRULI	> 3			Isolations with >50% viability by Media Conditions
	PHH13	F	46	Sarcoma liver metastasis	Perfusion	0.94	Yes	EM1: MM + Wnt S + TRULI	> 3			Conditions	Age (median)	Gender	Organoid formation	Passage (>3)	Passage 10
	PHH14	F	78	HCC	Perfusion	0.71	Yes	EM1: MM + Wnt S + TRULI	> 3			EM1: MM + Wnt S + TRULI	11-78 (57)	14 M(54%) / 12 F(46%)	26/26 (100%)	26/26 (100%)	0/7
	PHH15	M	74	Colorectal liver metastasis	Perfusion	0.59	Yes	EM1: MM + Wnt S + TRULI	> 3			EM2: MM + Wnt S + TRULI (-Nic)	11-85 (62)	17 M (60.7%)/ 11 F (30.3%)	28/28 (100%)	28/28 (100%)	6/9
	PHH16	F	60	Colorectal liver metastasis	Perfusion	0.7	Yes	EM1: MM + Wnt S + TRULI	> 3
	PHH17	M	19	Adenoma	Perfusion	0.78	Yes	EM1: MM + Wnt S + TRULI	> 3
	PHH18	F	52	Andenomatosis	Perfusion	0.63	Yes	EM1: MM + Wnt S + TRULI	> 3
	PHH19	M	39	NET liver metastasis	Perfusion	0.81	Yes	EM1: MM + Wnt S + TRULI	> 3
	PHH20	F	39	Colorectal liver metastasis	Perfusion	0.62	Yes	EM1: MM + Wnt S + TRULI	> 3
	PHH21	M	76	CCC	Perfusion	0.71	Yes	EM1: MM + Wnt S + TRULI	> 3
	DSD35	F	68	HCC	Perfusion	0.45	Yes	EM1: MM + Wnt S + TRULI	> 3
	PHH23	M	60	Colorectal liver metastasis	Perfusion	0.68	Yes	EM1: MM + Wnt S + TRULI	> 3
	PHH24	F	72	NET liver metastasis	Perfusion	0.69	Yes	EM1: MM + Wnt S + TRULI	> 3
	PHH25	M	69	CCC	Perfusion	0.54	Yes	EM1: MM + Wnt S + TRULI	> 3 **
	PHH27	M	57	NET liver metastasis	Perfusion	0.52	Yes	EM1: MM + Wnt S + TRULI	6	this donors where used for long-term expansion, >10 passage****
								EM2: MM + Wnt S + TRULI (-Nic)	9
	PHH28	M	69	suspected hemangioma	Perfusion	< 50%	Yes	EM1: MM + Wnt S + TRULI	10
								EM2: MM + Wnt S + TRULI (-Nic)	>10 (29)
	PHH29	F	26	suspected adenoma	Perfusion	0.62	Yes	EM1: MM + Wnt S + TRULI	5
								EM2: MM + Wnt S + TRULI (-Nic)	8
	DSD40	M	65	CCC (Klatskin)	Perfusion	0.85	Yes	EM1: MM + Wnt S + TRULI	5
								EM2: MM + Wnt S + TRULI (-Nic)	9
	DSD42	M	57	Colorectal liver metastasis	Perfusion	0.83	Yes	EM1: MM + Wnt S + TRULI	9
								EM2: MM + Wnt S + TRULI (-Nic)	>10 (11)
	DSD43	M	39	Colorectal liver metastasis	Perfusion	0.79	Yes	EM1: MM + Wnt S + TRULI	6
								EM2: MM + Wnt S + TRULI (-Nic)	>10 (22)
	F-PHH3	M	20	Lonza cryo-human hepatocytes (HUM180201A) Caucasian	Perfusion	0.73	Yes	EM1: MM + Wnt S + TRULI	3
								EM2: MM + Wnt S + TRULI (-Nic)	>10 (21)
	PHH36	M	71	open liver resection (Healthy Phh)	Perfusion	0.45	Yes	EM2: MM + Wnt S + TRULI (-Nic)	>10
	F-PHH5	M	56	Lonza cryo-human hepatocytes (HUM4244) Caucasian	Perfusion	0.63	yes	EM2: MM + Wnt S + TRULI (-Nic)	> 10
	F-PHH1	M	11	Lonza cryo-human hepatocytes (HUM18116) Caucasian	Perfusion	0.5	Yes	EM1: MM + Wnt S + TRULI	> 3	These donors were used for experiments and their long term expansion beyond 3 passages was not tested
								EM2: MM + Wnt S + TRULI (-Nic)	> 3
	F-PHH2	F	20	Lonza cryo-human hepatocytes (HUM183001) Caucasian	Perfusion	0.85	Yes	EM1: MM + Wnt S + TRULI	> 3
								EM2: MM + Wnt S + TRULI (-Nic)	> 3
	F-PHH4	F	25	Lonza cryo-human hepatocytes (HUM181372) Caucasian	Perfusion	0.7	Yes	EM1: MM + Wnt S + TRULI	>3
							Yes	EM2: MM + Wnt S + TRULI (-Nic)	> 3
	PHH30	F	21	Colorectal liver metastasis	Perfusion	0.72	Yes	EM2: MM + Wnt S + TRULI (-Nic)	> 3
	PHH31	F	65	Colorectal liver metastasis	Perfusion	0.8	Yes	EM2: MM + Wnt S + TRULI (-Nic)	> 3
	PHH32	M	74	HCC	Perfusion	0.61	Yes	EM2: MM + Wnt S + TRULI (-Nic)	> 3
	PHH33	F	60	Hemangioma	Perfusion	0.64	Yes	EM1: MM + Wnt S + TRULI	> 3
								EM2: MM + Wnt S + TRULI (-Nic)	> 3
	DSD46	F	85	CCC (Klatskin)	Perfusion	0.56	Yes	EM2: MM + Wnt S + TRULI (-Nic)	> 3
	DSD47	F	75	HCC	Perfusion	0.84	Yes	EM2: MM + Wnt S + TRULI (-Nic)	>3
	PHH34	M	67	Colorectal liver metastasis	Perfusion	0.84	Yes	EM2: MM + Wnt S + TRULI (-Nic)	> 3
	PHH35	F	68	CCC (Klatskin)	Perfusion	0.56	Yes	EM1: MM + Wnt S + TRULI	>3
								EM2: MM + Wnt S + TRULI (-Nic)	> 3
	DSD48	M	52	GEJ liver metastasis	Perfusion	0.64	Yes	EM2: MM + Wnt S + TRULI (-Nic)	> 3
	DSD49***	F	66	Colorectal liver metastasis	Perfusion	0.94	Yes	EM2: MM + Wnt S + TRULI (-Nic)	> 3
					Digestion	0.94	NO	EM2: MM + Wnt S + TRULI (-Nic)	n/a
	DSD50	M	68	Colorectal liver metastasis	Perfusion	0.7	Yes	EM2: MM + Wnt S + TRULI (-Nic)	> 3
	PHH37***	M	67	Colorectal liver metastasis	Perfusion	0.67	Yes	EM2: MM + Wnt S + TRULI (-Nic)	> 3
					Digestion	0.67	NO	EM2: MM + Wnt S + TRULI (-Nic)	n/a
	PHH38	F	43	Adenoma	Perfusion	0.63	Yes	EM2: MM + Wnt S + TRULI (-Nic)	> 3
	PHH39***	M	74	Colorectal liver metastasis	Perfusion	0.57	Yes	EM2: MM + Wnt S + TRULI (-Nic)	> 3
					Digestion	0.57	NO	EM2: MM + Wnt S + TRULI (-Nic)	n/a
	PHH40	M	68	HCC	Perfusion	0.64	Yes	EM2: MM + Wnt S + TRULI (-Nic)	> 3
	DSD52	M	54	Colorectal liver metastasis	Perfusion	0.75	Yes	EM2: MM + Wnt S + TRULI (-Nic)	> 3
	*In all instances where there is a diagnosis (not cryo-preserved PHH) the healthy adjacent part of the tissue was collected and used for hepatocyte isolation and organoid generation.
	**discontinued because contamination.
	*** These lines were used in the cell viability experiments to compare our h-HepOrg-EM2 to our h-HepOrg EM1, and the published medium for Hepatocyte organoids from mouse (Peng et al.,2018) or human fetal (Hu et al.,2018) or Cholangiocyte medium from Huch et al.,2015 as well as to compare in MM before and after MACS or not perfused tissue, all on the same donor, as shown in Extended Data Fig 1 f
	**** note that for these donors, we check their expandability beyond 10 passages when cultured in either EM1 (MM+Wnt+TRULI) or EM2 (MM+Wnt+TRULI - Nicotinamide). As detailed in the table, under EM1 the cultures exhibit lower expansion potential, with none of them reaching beyond passage 10. For the donors that reached passage 10, we stopped culturing them at time of submission. For 2 of these, DS…
	Yellow highlight, samples obtained during the revision process
