# Supplementary material for: Human assembloids recapitulate periportal liver tissue in vitro
Source: Research Square preprint supplement (doi:10.21203/rs.3.rs-5314788/v1), 2025-09-17
Supplement: Supplementary file 3 [file 5b8331f2303a4db08ab71302.xlsx]

## Sheet: Supplementary Table Info
Supplementary Dataset 5
Supplementary Dataset 5_S1 -Antibodies
Supplementary Dataset 5_S2 -Primers
Supplementary Dataset 5_S3 - Kits

## Sheet: S1 -Antibodies
Primary antibodies							Secondary antibodies					Flow cytometry antibodies					MACS selection antibodies
Target	Vendor	Cat.no.	Working con.	application	Blocking and permeabilization solution		Target	Vendor	Cat.no.	Working con.		Target	Vendor	Cat.no.	Working con.		Target	Vendor	Cat.no.	Working con.
BD Pharmingen™ APC Mouse Anti-Human CD90	BD biosciences	BD561971	1:50	IF	PBS containing 10% donkey serum and 0.1% Triton X-100		Alexa Fluor® 647 donkey anti-mouse IgG (H+L)	Invitrogen	A31571	1:1000		BD Pharmingen™ APC Mouse Anti-Human CD90	BD biosciences	BD561971	1 μg/test		Biotin anti-human CD326 (Ep-CAM)	BioLegend	324216	1:100
Polyclonal Rabbit Anti-Cytokeratin	Dako	Z0622	1:100	IF	PBS containing 10% donkey serum and 0.1% Triton X-100		Goat anti-Rabbit IgG (H+L) Cross-Adsorbed Secondary Antibody, Alexa Fluor™ 514	Invitrogen	A31558	1:1000		Anti-Biotin MicroBeads	Miltenyi Biotec	130-105-637
Keratin 19 antibody (troma iii)	Sigma	MABT913-25UG	1:100	IF	PBS containing 2% BSA and either 0.2 % Triton X-100		Goat anti-Rat IgG (H+L) Cross-Adsorbed Secondary Antibody, Alexa Fluor™ 647	Invitrogen	A21247	1:1000		BD Pharmingen™ PE Mouse Anti-Human CD140a	BD biosciences	556002	20 μL/test
HNF4α (C11F12) Rabbit mAb	CST	3113S	1:200	IF	PBS containing 2% BSA and either 0.2 % Triton X-100		Goat anti-Rabbit IgG (H+L) Cross-Adsorbed Secondary Antibody, Alexa Fluor™ 532	Invitrogen	A11009	1:1000		BD Pharmingen™ PE-Cy™7 Mouse Anti-Human CD45	BD biosciences	557748	5 μL/test
Monoclonal Anti-Vimentin antibody produced in mouse	Merck millipore	V2258-100UL	1:100	IF	PBS containing 2% BSA and either 0.2 % Triton X-100		Alexa Fluor™ 488 Phalloidin	Invitrogen	A12379	1:500		BD Pharmingen™ PE-Cy™7 Rat Anti-CD11b	BD biosciences	552850	1:100
Anti-CD13 antibody	Abcam	ab7417	1:200	IF	PBS containing 0.2% gelatin, 300 mM NaCl, and 0.3% Triton X-100 (Tx buffer); or PBS containing 2% BSA and either 0.1 % Triton X-100		Alexa Fluor 647 Phalloidin	Thermofisher	A-22287	1:500		CD31 (PECAM-1) Monoclonal Antibody (WM-59 (WM59)), PE-Cyanine7, eBioscience™	Thermo Fisher	25-0319-42	5 μL/test
Ki-67 Monoclonal Antibody (SolA15)	eBioscience	14-5698	1:200	IF	PBS containing 2% BSA and either 0.2 % Triton X-100		Donkey anti-Mouse IgG (H+L) Highly Cross-Adsorbed Secondary Antibody, Alexa Fluor™ 488	Invitrogen	A-21202	1:1000		Alexa Fluor® 488 anti-human CD326 (EpCAM) Antibody	Biolegend	324210	1:100
Cleaved Caspase-3 (Asp175) (5A1E) Rabbit	CST	9664	1:100	IF	PBS containing 2% BSA and either 0.2 % Triton X-100		Donkey anti-Rabbit IgG (H+L) Highly Cross-Adsorbed Secondary Antibody, Alexa Fluor™ 568	Invitrogen	A10042	1:1000
YAP (D8H1X) Rabbit mAb	Cell Signaling Technology	14074	1:200	IF	PBS containing 2% BSA and 1% Triton X-100		Donkey anti-Rat IgG (H+L) Highly Cross-Adsorbed Secondary Antibody, Alexa Fluor™ 488	Invitrogen	A21208	1:1000
Radixin (C4G7) Rabbit mAb	Cell Signaling Technology	2636	1:200	IF	PBS containing 2% BSA and either 0.1 % Triton X-100
Human E-Cadherin purified from mouse	BD-Biosciences	610182	1:150	IF	PBS containing 2% BSA and either 0.1 % Triton X-100
ZO-1 Polyclonal Antibody produced in Rabbit	Thermo Fisher	40-2200	1:100	IF	PBS containing 2% BSA and either 0.1 % Triton X-100
Anti-Glutamine Synthetase antibody produced in rabbit	Sigma-Aldrich (Merck)	G2781	1:500	IF	PBS containing 0.2% gelatin, 300 mM NaCl, and 0.3% Triton X-100 (Tx buffer); or PBS containing 2% BSA and either 0.1 % Triton X-100
Rabbit Polyclonal Cytochrome P450 2E1 antibody	Abcam	ab28146	1:200	IF	PBS containing 2% BSA and either 0.1 % Triton X-100
Anti-HAL antibody produced in rabbit	Sigma-Aldrich (Merck)	HPA038547	1:200	IF	PBS containing 0.2% gelatin, 300 mM NaCl, and 0.3% Triton X-100 (Tx buffer); or PBS containing 2% BSA and either 0.1 % Triton X-100
Anti-hGAPDH antibody	Abcam	ab128915	1:2000	IHC	For antigen retrieval, we used 10 mM citrate buffer.Permeabilization was not performed.Peroxidase blocking was carried out using 3% H₂O₂ in methanol. For blocking, we used 3% normal goat serum (NGS) in PBS.		Dako REAL EnVision Detection System	Dako	#K5007	n/a
Anti-SAA1 + SAA2 antibody [EPR19550]	Abcam	ab207445	1:50	IF	PBS containing 2% BSA and either 0.1 % Triton X-100

## Sheet: S2 -Primers
Gene name		sequence
GZMA	Forward	CTCACTGCAGAGAAATGGCTCC
	Reverse	CCTTGATGTGGAAGGTGAGACC
CD68	Forward	CGAGCATCATTCTTTCACCAGCT
	Reverse	ATGAGAGGCAGCAAGATGGACC
CD3D	Forward	GTCATTGCCACTCTGCTCCTTG
	Reverse	CCTGGTCATTCCTCAACAGAGC
CD79A	Forward	GCAACGAGTCATACCAGCAGTC
	Reverse	GGCTGTGATGATTCGGTTCTTGG
PECAM1	Forward	AAGTGGAGTCCAGCCGCATATC
	Reverse	ATGGAGCAGGACAGGTTCAGTC
KDR	Forward	GGAACCTCACTATCCGCAGAGT
	Reverse	CCAAGTTCGTCTTTTCCTGGGC
ICAM2	Forward	ATGACACGGTCCTCCAATGCCA
	Reverse	GCACTCAATGGTGAAGGACTTGC
TTR	Forward	CGTGCATGTGTTCAGAAAGGCTG
	Reverse	CTCCTCAGTTGTGAGCCCATGC
TF	Forward	TCAGCAGAGACCACCGAAGACT
	Reverse	GACCACACTTGCCCGCTATGTA
MYH11	Forward	GTCCAGGAGATGAGGCAGAAAC
	Reverse	GTCTGCGTTCTCTTTCTCCAGC
ACTA2	Forward	CTATGCCTCTGGACGCACAACT
	Reverse	CAGATCCAGACGCATGATGGCA
RGS5	Forward	GAAGCCAGACTCAGTTGGTGAC
	Reverse	GGAGTTTGTCCAGGGAATCACG
LRAT	Forward	TTGTCAAAGTGGCCAGCATC
	Reverse	CTGATCGGGGTGCCATATCT
MFAP4	Forward	CGGCTGGAATGACTACAAGC
	Reverse	TGTCAGGAGGTGCATGTTCT
PDGFRA	Forward	GACTTTCGCCAAAGTGGAGGAG
	Reverse	AGCCACCGTGAGTTCAGAACGC
KRT19	Forward	CGCGGCGTATCCGTGTCCTC
	Reverse	AGCCTGTTCCGTCTCAAACTTGGT
COL1A1	Forward	GATTCCCTGGACCTAAAGGTGC
	Reverse	AGCCTCTCCATCTTTGCCAGCA
COL3A1	Forward	TGGTCTGCAAGGAATGCCTGGA
	Reverse	TCTTTCCCTGGGACACCATCAG
HGF	Forward	GAGAGTTGGGTTCTTACTGCACG
	Reverse	CTCATCTCCTCTTCCGTGGACA
CXCL12	Forward	CTCAACACTCCAAACTGTGCCC
	Reverse	CTCCAGGTACTCCTGAATCCAC
RSPO3	Forward	CCAGAAGGGTTGGAAGCCAACA
	Reverse	CCTTCTTCGTGCATGGACTCCA
WNT5A	Forward	TACGAGAGTGCTCGCATCCTCA
	Reverse	TGTCTTCAGGCTACATGAGCCG
IL6	Forward	AGACAGCCACTCACCTCTTCAG
	Reverse	TTCTGCCAGTGCCTCTTTGCTG
TGFB1	Forward	TACCTGAACCCGTGTTGCTCTC
	Reverse	GTTGCTGAGGTATCGCCAGGAA
FGF7	Forward	CTGTCGAACACAGTGGTACCTG
	Reverse	CCAACTGCCACTGTCCTGATTTC
PDGFRB	Forward	AGACTGTTGGGCGAAGGTTA
	Reverse	CGGCAGTATAGAGGACGGAG
COL1A2	Forward	CCTGGTGCTAAAGGAGAAAGAGG
	Reverse	ATCACCACGACTTCCAGCAGGA
DES	Forward	TCCAGTCCTACACCTGCGAGAT
	Reverse	CGCAATGTTGTCCTGGTAGCCA
DCN	Forward	GCTCTCCTACATCCGCATTGCT
	Reverse	GTCCTTTCAGGCTAGCTGCATC
THY1	Forward	TGCTCAGAGACAAACTGGTCA
	Reverse	AACTTGAGGCTTCCTGTCTCC
ALB	Forward	CTGCCTGCCTGTTGCCAAAGC
	Reverse	GGCAAGGTCCGCCCTGTCATC
MKI67	Forward	ACCCTACAGAGTGCTCAACAACTT
	Reverse	TTCTCTGAATTTGAAATAGCGATG
CD13	Forward	GAGTACATGGAGGGCAATGT
	Reverse	GGTGTGGAACTCAGTGACAT
EPCAM	Forward	TAATCGTCAATGCCAGTGTACTTC
	Reverse	CTTCTCCCAAGTTTTGAGCCAT
HNF4A	Forward	GTACTCCTGCAGATTTAGCC
	Reverse	CTGTCCTCATAGCTTGACCT
HPRT	Forward	AAGAGCTATTGTAATGACCAGT
	Reverse	CAAAGTCTGCATTGTTTTGC
AFP	Forward	TCGTTGCTTACACAAAGAAAGC
	Reverse	CTGAG CTTGGCACAG ATCCT
CYP1A2	Forward	CCTTCAACCAGAGGTTCCTG
	Reverse	TCTAGGCCCCTTCTTGCTGT
HPRT	Forward	AAGAGCTATTGTAATGACCAGT
	Reverse	CAAAGTCTGCATTGTTTTGC
ANKRD1	Forward	AGCCCAGATCGAATTCCGTG
	Reverse	CTCCTTCTCTGTCTTTGGCGT
CYR61	Forward	TGAAGCGGCTCCCTGTTTT
	Reverse	CGGGTTTCTTTCACAAGGCG
AMOTL2	Forward	GCGACTGTCAGAACAACTGC
	Reverse	GCACCTTTAACCTGCTTTCCA

## Sheet: S3 - Kits
Kit	Vendor	Cat.no.
RNeasy Mini Kit	QUIAGEN	74104
P450-Glo™ CYP2C9 Assay System	Promega	V8791
P450-Glo™ CYP3A4 Assay and Screening System, Luciferin IPA	Promega	V9001
human Albumin AssayMax ELISA Kit	AssayPro	EA3201-1
Total Bile acid assay (colorimetric)	BioCat	STA-631
Glucose-Glo™ Assay	promega	J6021
Urea Assay Kit	Abnova	KA1652
