# Supplementary material for: Human assembloids recapitulate periportal liver tissue in vitro
Source: Research Square preprint supplement (doi:10.21203/rs.3.rs-5314788/v1), 2025-09-17
Supplement: Supplementary file 4 [file 7b3511364c2afbd8c0dfa0c8.xlsx]

## Sheet: Supplementary Table Info
Supplementary Dataset 1: IPA analysis of publicly available datasets
Supplementary Dataset 1_S1 - DEG tables provided to IPA analysis. Filtered by |log2Foldchange| >1 and padj < 0.1
Supplementary Dataset 1_S2 - IPA pathway analysis output with -log(adj p-values) of overlap showed. Filtered for terms that -log(B-H p-values) >1.3 in at least 2 comparisons.
Supplementary Dataset 1_S3 - Subset of the IPA pathway analysis output and the adjp value from S2 used for Figure
Supplementary Dataset 1_S4 - IPA pathway analysis output with activity z-score showed. Filtered for terms that -log(B-H p-values) >1.3 in at least 2 comparisons.
Supplementary Dataset 1_S5 - Subset of the IPA pathway analysis activity z-score from S4 used for Figure
Supplementary Dataset 1_S6 - IPA upstream regulator analysis output. Filtered for the molecules belong to the two signalling pathway terms and has a upstream regulator adj-pvalue <0.1 identified as part of the shortlisted pathway.
Supplementary Dataset 1_S7 - Selected pathway members from S6 that used for Figure.
	DEG_HCCOrganoid_vs_HCCTissue	stands for the IPA analysis generated from the DEG in HCC organoid vs liver tissue from HCC patient(Broutie et al. 201, doi: 10.1038/nm.4438)
	DEG_PHx_vs_undamaged_Hepatocytes	stands for the IPA analysis generated from the DEG in post hapatactomy vs undamaged hepatocytes in mouse. The associated DEG file is in (Hu et al., 2018, DOI: 10.1016/j.cell.2018.11.013 Supplementary table 2: mRNA-seq diff exp after PHx )
	DE_HCCOrganoid_vs_HealthyTissue	stands for the IPA analysis generated from the DEG in HCC organoid vs liver tissue from healthy donor (Broutier et al. 2018, doi: 10.1038/nm.4438)
	HCC Mutated_genes	stands for the IPA analysis of the list of mutated genes shared by HCC patients in WES analysis (Broutier et al., 2018, doi: 10.1038/nm.4438, supplementary Dataset 4 S1 and S3)

## Sheet: S1_IPA analysis input
Supplementary Dataset 1_S1: DEG tables or gene list provided to IPA for analysis.
DEG table from HCC Oganoid vs Healthy donor tissue (List 1), Filtered by |log2Foldchange| >1 and padj < 0.1									DEG table from HCC Organoid vs HCC patient tissue (List2), Filtered by |log2Foldchange| >1 and padj < 0.1									DEG_PHx_vs_undamaged_Hepatocytes list in mouse (List 3), Downloaded from Hu et al., 2018 Supplementary tables2					Common HCC mutated sites (n=2) (List 4), Broutier et al., 2018
EnsemblID	gene_symbol	baseMean	log2FoldChange	lfcSE	stat	pvalue	padj		EnsemblID	gene_symbol	baseMean	log2FoldChange	lfcSE	stat	pvalue	padj			log2FoldChange	pvalue			gene_symbol
ENSG00000179403	VWA1	137.138	-2.22929	0.797696	-2.79465	0.00519551	0.0350248		ENSG00000188976	NOC2L	322.092	1.76319	0.687672	2.564	0.0103472	0.0592255		Lcn2__chr2	6.0086	7.9e-07			HSP90AB1
ENSG00000189409	MMP23B	6.76531	-6.20751	2.36809	-2.62132	0.00875906	0.0511084		ENSG00000187608	ISG15	152.539	-2.99465	0.791323	-3.78436	0.000154102	0.00228695		Sgol2__chr1	5.27136	0.000610443			RPN1
ENSG00000248333	CDK11B	84.5317	-2.09063	0.844006	-2.47703	0.0132481	0.0691045		ENSG00000160087	UBE2J2	152.998	1.96833	0.780922	2.52052	0.0117182	0.0648905		Saa1__chr7	5.186	1.04e-05			NCOA4
ENSG00000078369	GNB1	245.355	-2.05126	0.669235	-3.06508	0.0021761	0.0180006		ENSG00000179403	VWA1	152.209	-2.25662	0.793893	-2.84247	0.00447651	0.0316462		Ly6d__chr15	5.09323	5e-06			LASP1
ENSG00000157933	SKI	24.8244	-3.89303	1.29196	-3.01327	0.00258445	0.0206084		ENSG00000078369	GNB1	237.978	-1.81616	0.729589	-2.48928	0.0128	0.0692497		Orm3__chr4	5.07723	6.97e-05			CHD1L
ENSG00000198912	C1orf174	105.514	3.01791	0.78239	3.8573	0.000114645	0.00177793		ENSG00000157933	SKI	32.9437	-4.91316	1.62037	-3.03213	0.00242839	0.0200979		Cxcl14__chr13	4.90942	0.00166458			SPOP
ENSG00000069424	KCNAB2	35.8161	-4.71734	1.21535	-3.88147	0.000103827	0.00164702		ENSG00000157873	TNFRSF14	237.064	-2.14246	0.897859	-2.38619	0.0170241	0.0849895		Ckap2__chr8	4.8402	0.0004686			DDX3X
ENSG00000097021	ACOT7	98.1139	1.95898	0.844094	2.32081	0.0202971	0.0945659		ENSG00000198912	C1orf174	169.523	2.24744	0.78342	2.86875	0.00412101	0.0296839		Gstm3__chr3	4.80635	0.000631547			VHL
ENSG00000049246	PER3	120.803	-3.25749	0.961121	-3.38927	0.000700796	0.00755711		ENSG00000069424	KCNAB2	46.1043	-5.57399	1.45258	-3.83731	0.00012439	0.00190612		Cyp2b13__chr7	4.77306	0.00498647			RECQL4
ENSG00000049247	UTS2	12.7575	-3.30805	1.34108	-2.46672	0.0136359	0.0706161		ENSG00000187017	ESPN	165.785	-3.97576	0.904755	-4.3943	1.11131e-05	0.000259544		9030619P08Rik__chr15	4.51283	0.001574			THRAP3
ENSG00000116285	ERRFI1	358.141	-2.8371	0.663651	-4.27499	1.9115e-05	0.000428201		ENSG00000049246	PER3	73.4484	-2.2266	0.961626	-2.31545	0.0205882	0.0973656		Ccnb2__chr9	4.42984	0.0021255			JAZF1
ENSG00000142599	RERE	116.279	-3.42206	0.818495	-4.18092	2.90328e-05	0.000598603		ENSG00000116288	PARK7	1656.6	1.69078	0.599819	2.81882	0.00481999	0.0332802		Clhc1__chr4	4.42689	0.00287899			FIP1L1
ENSG00000074800	ENO1	8277	2.93232	0.88038	3.33074	0.000866154	0.00894594		ENSG00000116285	ERRFI1	812.806	-3.97885	0.742595	-5.35803	8.41325e-08	4.44924e-06		Cyp3a44__chr5	4.36484	0.0107453			PIM1
ENSG00000049239	H6PD	465.107	-2.86426	0.65671	-4.36152	1.29161e-05	0.000308072		ENSG00000142599	RERE	73.2283	-2.57498	0.944034	-2.72763	0.00637902	0.0411167		Hapln1__chr13	4.28256	0.00462504			TFE3
ENSG00000162444	RBP7	43.1053	-3.38305	0.965087	-3.50543	0.000455864	0.00544442		ENSG00000074800	ENO1	11905.5	3.05684	0.637907	4.79198	1.65147e-06	5.40291e-05		Cdkn3__chr14	4.27327	0.00327726			ROBO1
ENSG00000142657	PGD	1731.7	3.36162	1.06488	3.1568	0.00159511	0.0143085		ENSG00000049239	H6PD	473.984	-2.79345	0.728752	-3.83319	0.00012649	0.00193459		Cdkn2c__chr4	4.25606	0.000140633			MYH9
ENSG00000130940	CASZ1	19.994	-3.43725	1.21944	-2.81872	0.00482158	0.0329733		ENSG00000171621	SPSB1	65.0007	-2.81394	0.981776	-2.86618	0.00415462	0.0298991		Ccnd1__chr7	4.23562	0.0008499			BIVM-ERCC5
ENSG00000009724	MASP2	651.41	-5.73924	0.910986	-6.30003	2.97591e-10	3.91522e-08		ENSG00000142657	PGD	2636.24	2.85909	0.620828	4.60529	4.11889e-06	0.000113415		Alas1__chr9	4.22503	9.89e-09			FGFR1OP
ENSG00000198793	MTOR	103.785	-2.55874	0.82782	-3.09093	0.0019953	0.0169274		ENSG00000175279	CENPS	33.3232	4.04583	1.65416	2.44586	0.0144509	0.0755755		2810408I11Rik__chr1	4.15258	0.00409322			EML4
ENSG00000116663	FBXO6	248.533	3.92	0.719146	5.45091	5.01127e-08	3.21984e-06		ENSG00000009724	MASP2	547.353	-5.34099	0.767759	-6.95659	3.48599e-12	5.69071e-10		Prtn3__chr10	4.14011	0.00450393			MDM2
ENSG00000116685	KIAA2013	155.718	-2.33492	0.905228	-2.57938	0.00989781	0.05604		ENSG00000116661	FBXO2	187.261	-3.57911	0.815084	-4.39109	1.12782e-05	0.000262632		Fgl1__chr8	4.0643	2.45e-10			ETV1
ENSG00000048707	VPS13D	74.9	-4.01353	0.936297	-4.2866	1.81427e-05	0.000410863		ENSG00000116663	FBXO6	392.878	2.98982	0.674856	4.43031	9.40997e-06	0.000225024		Mis18bp1__chr12	3.91268	0.00786313			NCOA3
ENSG00000179172	HNRNPCL1	19.3521	2.77028	1.15357	2.40149	0.0163286	0.0805352		ENSG00000116685	KIAA2013	157.803	-2.22848	0.771758	-2.88753	0.00388276	0.0284143		Ncapd2__chr6	3.89453	0.00634485			BRD9
ENSG00000116731	PRDM2	102.833	-4.223	0.74155	-5.69483	1.23493e-08	9.79495e-07		ENSG00000048707	VPS13D	87.3325	-4.40333	1.02171	-4.30978	1.63418e-05	0.000356412		Il13ra1__chrX	3.89124	0.00454778			RELN
ENSG00000197312	DDI2	359.933	-2.45335	0.693585	-3.5372	0.000404389	0.0049952		ENSG00000162496	DHRS3	1365.61	-2.0748	0.717835	-2.89036	0.00384805	0.0281873		Ccna2__chr3	3.79947	0.0093723			ZRSR2
ENSG00000116786	PLEKHM2	40.0464	-2.59527	0.858253	-3.0239	0.00249536	0.0200706		ENSG00000116731	PRDM2	90.9795	-3.96165	0.930206	-4.2589	2.05439e-05	0.000429622		Mad2l1__chr6	3.7977	0.00676746			DDX6
ENSG00000065526	SPEN	151.462	-3.87403	0.74067	-5.23045	1.69101e-07	9.14516e-06		ENSG00000197312	DDI2	299.642	-2.00184	0.686888	-2.91436	0.00356418	0.0266447		Cenpm__chr15	3.79418	0.0077932			ZNF384
ENSG00000074964	ARHGEF10L	198.726	-2.75983	0.635237	-4.34456	1.39552e-05	0.000328601		ENSG00000116786	PLEKHM2	55.7818	-2.78718	1.11606	-2.49735	0.0125127	0.068034		Prc1__chr7	3.77131	0.0101961			WWTR1
ENSG00000169991	IFFO2	19.1999	-4.23776	1.52539	-2.77815	0.00546694	0.0361661		ENSG00000162460	TMEM82	183.492	-4.21365	1.08384	-3.88771	0.000101195	0.00162705		Top2a__chr11	3.7626	0.00157707			PRKCI
ENSG00000127481	UBR4	401.255	-2.52421	0.753361	-3.3506	0.000806364	0.00846555		ENSG00000233954	UQCRHL	132.767	2.50375	0.850121	2.94517	0.00322781	0.0247667		Ube2c__chr2	3.74927	0.00779673			SMAD4
ENSG00000053371	AKR7A2	427.278	2.19932	0.809033	2.71845	0.00655882	0.041435		ENSG00000065526	SPEN	115.984	-3.41105	0.858082	-3.9752	7.03207e-05	0.00120578		Card6__chr15	3.72963	0.00911768			MKL1
ENSG00000188257	PLA2G2A	4238.04	6.16358	1.3492	4.5683	4.91685e-06	0.000140287		ENSG00000074964	ARHGEF10L	214.349	-2.77588	0.751007	-3.69621	0.000218845	0.00303124		Mrps18c__chr5	3.72871	0.00698488			PIK3C2B
ENSG00000162543	UBXN10	38.6405	7.99274	1.64662	4.85402	1.20983e-06	4.70782e-05		ENSG00000169991	IFFO2	18.1227	-4.69613	1.96525	-2.38958	0.0168677	0.0844333		Acot3__chr12	3.72525	0.0158017			PHF6
ENSG00000158825	CDA	43.7949	-3.42647	1.26774	-2.70281	0.00687566	0.0428649		ENSG00000127481	UBR4	390.661	-2.32298	0.681124	-3.41051	0.00064841	0.0071028		Bmper__chr9	3.71488	0.00281288			MAPK9
ENSG00000158828	PINK1	486.711	-2.50807	0.835119	-3.00325	0.00267116	0.0211359		ENSG00000053372	MRTO4	233.024	2.34958	0.748081	3.14081	0.00168483	0.0151735		Tacc3__chr5	3.67513	0.00993453			STAG2
ENSG00000244038	DDOST	1796.37	2.77374	0.840796	3.29894	0.000970503	0.00977401		ENSG00000188257	PLA2G2A	6337.33	10.0278	4.05478	2.47309	0.013395	0.0715505		Cdk1__chr10	3.6751	0.000840145			ITGB8
ENSG00000075151	EIF4G3	190.891	-3.48207	0.719463	-4.83981	1.29961e-06	4.94119e-05		ENSG00000162545	CAMK2N1	176.935	-2.1263	0.766581	-2.77375	0.00554149	0.0369079		Gm2382__chr9	3.65852	0.0173782			MAP2K6
ENSG00000117298	ECE1	292.842	-1.99783	0.744342	-2.68402	0.00727437	0.0447614		ENSG00000158825	CDA	88.6502	-4.84526	1.48703	-3.25836	0.00112059	0.0109916		Ccnb1__chr13	3.63313	0.00225337			RABEP1
ENSG00000162551	ALPL	141.685	-5.69011	1.05471	-5.39496	6.85392e-08	4.23946e-06		ENSG00000158828	PINK1	525.082	-2.37328	0.662008	-3.58498	0.000337107	0.00424649		D7Ertd715e__chr7	3.61702	0.0196623			PCM1
ENSG00000187942	LDLRAD2	61.5582	-3.66609	1.35066	-2.7143	0.00664153	0.0417824		ENSG00000244038	DDOST	2508.65	3.28594	0.607983	5.40467	6.49294e-08	3.55733e-06		Adam32__chr8	3.60887	0.0150305			FNBP1
ENSG00000142798	HSPG2	124.417	-2.40623	0.814166	-2.95545	0.00312209	0.0236756		ENSG00000075151	EIF4G3	92.5475	-2.1721	0.882848	-2.46033	0.0138809	0.0733895		Iqgap3__chr3	3.6065	0.0131672			ATM
ENSG00000173372	C1QA	297.031	-10.1928	1.57103	-6.48795	8.7014e-11	1.35592e-08		ENSG00000117298	ECE1	267.546	-1.76063	0.764984	-2.30153	0.0213617	0.0999545		Mt1__chr8	3.60304	2.86e-05			AFF4
ENSG00000159189	C1QC	229.148	-9.85031	1.50288	-6.55428	5.59091e-11	9.4572e-09		ENSG00000187942	LDLRAD2	43.8057	-4.84453	1.7219	-2.81348	0.00490081	0.0336783		Crlf2__chr5	3.58829	0.0116955			BCR
ENSG00000173369	C1QB	302.404	-11.7025	1.72519	-6.78328	1.17474e-11	2.43421e-09		ENSG00000173372	C1QA	312.468	-10.2936	1.51938	-6.7749	1.24492e-11	1.82718e-09		Plk1__chr7	3.58371	0.0139679			COL1A2
ENSG00000179546	HTR1D	42.5507	4.83231	1.38706	3.48385	0.000494249	0.00580253		ENSG00000159189	C1QC	210.55	-9.70825	1.51705	-6.39941	1.5598e-10	1.69752e-08		Spc25__chr2	3.57156	0.0137677			AKT3
ENSG00000133226	SRRM1	314.099	-2.68537	0.678819	-3.95593	7.6236e-05	0.00127524		ENSG00000173369	C1QB	280.73	-11.6115	4.20748	-2.75973	0.00578496	0.0380385		Ect2__chr3	3.54197	0.0153698			PML
ENSG00000169504	CLIC4	203.969	-2.4623	0.72315	-3.40497	0.00066172	0.00724429		ENSG00000179546	HTR1D	65.5082	4.34454	1.32075	3.28944	0.00100386	0.0100941		Aurka__chr2	3.53786	0.0144226			HIST1H3B
ENSG00000204178	TMEM57	212.28	-2.88798	0.646039	-4.47028	7.81156e-06	0.000205217		ENSG00000142676	RPL11	3108.85	1.56501	0.589878	2.6531	0.00797555	0.0489988		Cdca2__chr14	3.53468	0.0147462			GPC3
ENSG00000117632	STMN1	845.51	3.69659	0.863682	4.28003	1.86867e-05	0.000420312		ENSG00000133226	SRRM1	237.89	-2.06809	0.723644	-2.85788	0.00426484	0.030474		Aim1__chr10	3.52769	0.0103364			SNX29
ENSG00000175087	PDIK1L	50.1913	-3.10112	1.04074	-2.97973	0.00288504	0.0223692		ENSG00000020633	RUNX3	14.9943	-7.08635	2.41613	-2.93293	0.00335779	0.0255435		Neurl1b__chr17	3.518	0.0161114			CHD1
ENSG00000169442	CD52	18.0019	-7.62727	2.2752	-3.35236	0.000801263	0.00842616		ENSG00000117632	STMN1	1255.12	3.84141	0.755427	5.08508	3.67464e-07	1.52297e-05		Mterfd1__chr13	3.47574	0.0271481			SMAD7
ENSG00000176092	CRYBG2	21.4689	8.14998	1.83419	4.44337	8.85591e-06	0.000228272		ENSG00000142669	SH3BGRL3	1703.73	1.58729	0.685868	2.31427	0.0206528	0.0976079		Ccrn4l__chr3	3.46673	0.000152176			PTCH1
ENSG00000198830	HMGN2	3528.36	3.05198	0.721927	4.22755	2.36253e-05	0.000507301		ENSG00000169442	CD52	64.4329	-9.37426	1.81098	-5.17635	2.26273e-07	1.03426e-05		Vps72__chr3	3.44482	0.0116769			ACVR2A
ENSG00000117713	ARID1A	260.042	-2.89421	0.663834	-4.35983	1.30162e-05	0.000309568		ENSG00000176092	CRYBG2	35.9724	4.4443	1.52684	2.91078	0.00360527	0.0269016		Ccdc104__chr11	3.44207	0.0267323			ARID2
ENSG00000175793	SFN	14.1649	4.35238	1.76715	2.46293	0.0137807	0.0711215		ENSG00000198830	HMGN2	5392.62	2.51078	0.653315	3.84314	0.000121472	0.00187258		Tmem43__chr6	3.43412	0.0123202			RALGDS
ENSG00000131910	NR0B2	123.892	-2.42168	0.820365	-2.95196	0.00315765	0.0238689		ENSG00000117713	ARID1A	241.243	-2.69539	0.73828	-3.6509	0.000261325	0.00348971		Cenpn__chr8	3.42759	0.0181323			DICER1
ENSG00000142748	FCN3	884.571	-13.2516	1.73249	-7.64885	2.02778e-14	8.40363e-12		ENSG00000175793	SFN	20.5499	7.19878	2.2739	3.16582	0.00154644	0.0141776		Ftsjd1__chr8	3.40192	0.035306			DLC1
ENSG00000000938	FGR	23.7458	-6.49237	1.67788	-3.86939	0.000109107	0.00171437		ENSG00000131910	NR0B2	533.637	-3.99444	0.861132	-4.63859	3.508e-06	9.89789e-05		Dnph1__chr17	3.39651	0.0169173			BIRC3
ENSG00000130772	MED18	132.21	2.5346	0.718186	3.52917	0.000416859	0.00508857		ENSG00000142748	FCN3	187.095	-25.139	4.8877	-5.14332	2.69928e-07	1.19293e-05		Thnsl2__chr6	3.38743	0.0157366			CREB3L1
ENSG00000159023	EPB41	143.161	-1.97662	0.817735	-2.41719	0.0156408	0.078094		ENSG00000158195	WASF2	220.638	-1.77219	0.71963	-2.46264	0.0137918	0.07306		Larp7__chr3	3.38185	0.0136092			NCOA1
ENSG00000253304	TMEM200B	24.466	-3.24307	1.2228	-2.65216	0.0079978	0.0478347		ENSG00000000938	FGR	14.2547	-5.56881	2.29812	-2.4232	0.0153844	0.0790367		Cox6b2__chr7	3.37173	0.0255262			SMARCA2
ENSG00000162511	LAPTM5	138.684	-6.67378	1.0917	-6.11318	9.76635e-10	1.1482e-07		ENSG00000130775	THEMIS2	21.6173	-5.27213	1.75493	-3.00419	0.00266292	0.021384		Nt5e__chr9	3.35993	0.0105768			KAT6A
ENSG00000134644	PUM1	166.309	-1.69446	0.683074	-2.48064	0.0131146	0.0685376		ENSG00000130772	MED18	214.195	1.73892	0.734457	2.36763	0.0179024	0.0883685		Knstrn__chr2	3.34672	0.021173			KSR1
ENSG00000060688	SNRNP40	89.039	2.83325	0.968329	2.92592	0.00343441	0.0255187		ENSG00000198492	YTHDF2	396.697	1.85342	0.670116	2.76582	0.00567797	0.0375511		Desi2__chr1	3.33419	0.0148776			JAK2
ENSG00000142910	TINAGL1	86.7204	-4.90845	0.918374	-5.34471	9.05596e-08	5.36145e-06		ENSG00000253304	TMEM200B	60.576	-4.80306	1.15119	-4.17224	3.01622e-05	0.000597261		Mcm6__chr1	3.33055	0.0192624			IGF2
ENSG00000184007	PTP4A2	281.231	-2.71918	0.664777	-4.09036	4.30701e-05	0.000821603		ENSG00000162511	LAPTM5	116.174	-6.37011	1.05183	-6.05623	1.39351e-09	1.30371e-07		Robo1__chr16	3.31872	0.0200298			PDGFRB
ENSG00000084623	EIF3I	1368.04	2.39836	0.985795	2.43292	0.0149777	0.0757431		ENSG00000162512	SDC3	70.7262	-3.26419	1.3303	-2.45372	0.0141387	0.0742341		Serpinb8__chr1	3.31826	0.0243872			SLIT2
ENSG00000183615	FAM167B	56.1067	-7.80706	1.52886	-5.10645	3.2827e-07	1.59581e-05		ENSG00000060688	SNRNP40	135.739	2.41018	0.80399	2.99777	0.00271961	0.0216625		Cyp2c69__chr19	3.30534	0.0437335			EPHA4
ENSG00000175130	MARCKSL1	933.957	2.78916	0.681216	4.09439	4.2328e-05	0.000809309		ENSG00000184007	PTP4A2	226.534	-2.17869	0.766142	-2.84371	0.00445915	0.0315513		Cdc20__chr4	3.2986	0.0240333			STAT4
ENSG00000160097	FNDC5	24.5146	-6.77573	1.67217	-4.05206	5.07678e-05	0.00094031		ENSG00000084623	EIF3I	1907.95	2.63805	0.604614	4.36319	1.28178e-05	0.000293782		Eppk1__chr15	3.29019	0.0231459
ENSG00000116514	RNF19B	12.8681	-3.85174	1.47189	-2.61686	0.00887431	0.0515631		ENSG00000183615	FAM167B	15.832	-5.35369	2.26962	-2.35885	0.0183319	0.0898509		Cldn14__chr16	3.28893	0.021705
ENSG00000134686	PHC2	158.067	-3.47637	0.881463	-3.94387	8.01771e-05	0.00133043		ENSG00000116478	HDAC1	208.812	1.76243	0.727553	2.4224	0.0154183	0.079075		Atp2c1__chr9	3.27899	0.0167576
ENSG00000187513	GJA4	22.1468	-6.2882	1.87674	-3.3506	0.000806354	0.00846555		ENSG00000175130	MARCKSL1	1241.84	4.58029	0.618637	7.40383	1.32312e-13	2.71376e-11		Rbl1__chr2	3.26469	0.000988777
ENSG00000146463	ZMYM4	98.0366	-2.96598	0.74831	-3.96357	7.38371e-05	0.00124516		ENSG00000160058	BSDC1	201.59	-1.86346	0.755394	-2.46688	0.0136297	0.0725376		Slc35a3__chr3	3.25908	0.0206687
ENSG00000092853	CLSPN	55.2592	2.70207	1.01884	2.65211	0.00799897	0.0478347		ENSG00000160097	FNDC5	75.6785	-5.97022	1.77193	-3.36934	0.000753492	0.00801487		Ncald__chr15	3.25581	0.0265287
ENSG00000116871	MAP7D1	76.8695	-2.60153	0.74324	-3.50026	0.000464803	0.00552332		ENSG00000134686	PHC2	145.923	-3.27702	0.800646	-4.09297	4.25875e-05	0.000797395		Tceb3__chr4	3.24593	0.0170267
ENSG00000054118	THRAP3	251.46	-1.80884	0.635029	-2.84844	0.00439345	0.030808		ENSG00000092853	CLSPN	79.3962	2.94659	0.960286	3.06845	0.00215171	0.0183004		Ptgr1__chr4	3.21729	0.0231263
ENSG00000119535	CSF3R	45.6164	-2.08491	0.892142	-2.33697	0.0194405	0.0919691		ENSG00000054118	THRAP3	263.044	-1.69409	0.698291	-2.42605	0.0152643	0.0786327		Lrtm1__chr14	3.21693	0.0386658
ENSG00000134690	CDCA8	18.526	5.78008	1.72233	3.35597	0.000790874	0.00833459		ENSG00000204084	INPP5B	220.605	1.71782	0.717322	2.39477	0.0166307	0.0835086		Cenpf__chr1	3.20697	0.0234752
ENSG00000116954	RRAGC	106.71	-3.03585	0.730006	-4.15867	3.20111e-05	0.000648714		ENSG00000174574	AKIRIN1	473.04	2.27683	0.657245	3.4642	0.000531819	0.00608151		Nudcd1__chr15	3.19989	0.0247093
ENSG00000127603	MACF1	378.038	-2.2085	0.645439	-3.42171	0.000622291	0.00696067		ENSG00000127603	MACF1	359.298	-1.86868	0.722823	-2.58525	0.00973085	0.0568154		Shcbp1__chr8	3.18676	0.0338322
ENSG00000168389	MFSD2A	193.206	-6.21093	0.970758	-6.39802	1.57405e-10	2.28887e-08		ENSG00000168389	MFSD2A	610.371	-5.66956	1.35888	-4.17221	3.01654e-05	0.000597261		Tpx2__chr2	3.17599	0.000917611
ENSG00000117000	RLF	52.9434	-2.3619	0.781008	-3.02417	0.00249313	0.0200624		ENSG00000084070	SMAP2	294.308	-2.34828	0.705028	-3.33076	0.0008661	0.00899148		Mmd2__chr5	3.1602	0.0162171
ENSG00000179862	CITED4	23.3699	-3.56622	1.3924	-2.5612	0.0104312	0.0580456		ENSG00000179862	CITED4	32.8175	-4.36738	1.43459	-3.04435	0.00233185	0.0194195		Slc41a3__chr6	3.14178	0.0300058
ENSG00000117385	P3H1	227.365	1.4565	0.628723	2.31659	0.0205259	0.0952847		ENSG00000127124	HIVEP3	37.9117	-3.44234	1.29588	-2.65638	0.00789843	0.0487121		Gss__chr2	3.11963	0.0215456
ENSG00000164008	C1orf50	47.3569	-2.02116	0.849696	-2.37869	0.0173745	0.0847606		ENSG00000117394	SLC2A1	350.688	5.55952	0.981368	5.66507	1.46967e-08	9.8789e-07		Immp2l__chr12	3.1169	0.0281844
ENSG00000117394	SLC2A1	238.643	4.25192	1.47422	2.88418	0.00392432	0.0282105		ENSG00000117399	CDC20	152.302	4.54631	1.45848	3.11715	0.00182608	0.0160691		Asf1b__chr8	3.11158	0.0294902
ENSG00000243710	CFAP57	72.0098	-2.91262	0.915293	-3.18218	0.00146173	0.0133947		ENSG00000198198	SZT2	354.983	-2.3936	0.672731	-3.55803	0.000373651	0.0046124		Copb2__chr9	3.11136	0.0195436
ENSG00000117399	CDC20	89.8505	5.09056	1.30617	3.89733	9.72607e-05	0.00155927		ENSG00000178922	HYI	175.9	-2.03514	0.767843	-2.65047	0.00803805	0.0492881		Prmt3__chr7	3.11037	0.0231237
ENSG00000142949	PTPRF	892.675	-2.13727	0.687606	-3.10827	0.00188183	0.0161884		ENSG00000142949	PTPRF	1242.72	-2.62901	0.62591	-4.2003	2.66567e-05	0.00053642		Gin1__chr1	3.1045	0.0303236
ENSG00000132768	DPH2	78.3166	2.78217	0.979374	2.84077	0.00450054	0.0313633		ENSG00000132768	DPH2	116.767	2.54678	0.840184	3.03122	0.00243568	0.0201479		Fabp2__chr3	3.09803	0.00412362
ENSG00000117410	ATP6V0B	2064.38	2.35751	0.810835	2.90751	0.00364314	0.0266515		ENSG00000117410	ATP6V0B	2859.99	2.50519	0.632367	3.96161	7.44449e-05	0.0012563		Gstt3__chr10	3.09602	0.000833186
ENSG00000085998	POMGNT1	196.791	1.62283	0.606311	2.67657	0.00743803	0.0454522		ENSG00000117411	B4GALT2	74.6678	-2.33401	0.946445	-2.46608	0.0136602	0.0726273		Atp2b2__chr6	3.09492	0.03421
ENSG00000117480	FAAH	184.349	-2.67505	0.7044	-3.79762	0.000146089	0.00216225		ENSG00000142945	KIF2C	31.3278	6.05711	1.80975	3.34693	0.000817113	0.00855003		Cenpe__chr3	3.07621	0.0157582
ENSG00000159658	EFCAB14	211.477	-1.81119	0.608876	-2.97464	0.00293328	0.0225793		ENSG00000132763	MMACHC	2645.73	1.87118	0.611541	3.05978	0.00221498	0.0186075		Mfsd2a__chr4	3.07064	0.0185037
ENSG00000187048	CYP4A11	1227.82	-6.64107	0.946095	-7.01946	2.22732e-12	5.4207e-10		ENSG00000117450	PRDX1	6543.11	2.54038	0.586343	4.33258	1.47374e-05	0.000327458		Col3a1__chr1	3.06539	0.0386136
ENSG00000162365	CYP4A22	563.628	-6.85032	1.09308	-6.26696	3.68153e-10	4.73091e-08		ENSG00000173660	UQCRH	1462.88	2.53259	0.607266	4.17048	3.03962e-05	0.000599953		Reep4__chr14	3.0577	0.0279608
ENSG00000162366	PDZK1IP1	10.1798	-5.53201	2.13764	-2.58791	0.00965607	0.0549875		ENSG00000187048	CYP4A11	1860.6	-6.70542	0.839641	-7.98605	1.39326e-15	4.37046e-13		Mcm2__chr6	3.04723	0.0334183
ENSG00000085832	EPS15	127.835	-3.34558	0.770636	-4.34133	1.41623e-05	0.000333005		ENSG00000186377	CYP4X1	22.3107	-3.81036	1.55502	-2.45035	0.0142717	0.0747851		Acnat2__chr4	3.04681	0.0353836
ENSG00000134744	ZCCHC11	169.653	-1.89806	0.645639	-2.93981	0.00328414	0.0247011		ENSG00000162365	CYP4A22	1154.35	-7.99145	0.818259	-9.7664	1.56926e-22	1.14114e-19		Kif18a__chr2	3.03039	0.0388411
ENSG00000162378	ZYG11B	294.433	-1.85004	0.678916	-2.72499	0.00643037	0.0408571		ENSG00000117834	SLC5A9	230.898	-3.17564	0.729951	-4.35049	1.35835e-05	0.000305639		Ifi27l2b__chr12	3.02645	0.00890216
ENSG00000121310	ECHDC2	890.562	-3.73899	0.724843	-5.15834	2.49146e-07	1.25535e-05		ENSG00000085832	EPS15	94.598	-2.84001	0.898941	-3.15929	0.00158155	0.014432		1700066M21Rik__chr1	3.02064	0.0355744
ENSG00000211452	DIO1	381.136	-3.04024	1.07733	-2.822	0.00477247	0.0327185		ENSG00000117862	TXNDC12	383.385	2.20778	0.775306	2.84762	0.00440476	0.0312771		Kpna2__chr11	3.01923	2.2e-05
ENSG00000157216	SSBP3	64.476	-3.08234	0.877047	-3.51445	0.000440661	0.00531261		ENSG00000121310	ECHDC2	1411.8	-3.69554	0.832928	-4.4368	9.13063e-06	0.000219657		Polq__chr16	3.00732	0.0426526
ENSG00000162402	USP24	73.7063	-2.7455	0.905407	-3.03234	0.00242665	0.0196131		ENSG00000211452	DIO1	301.377	-2.89424	0.850518	-3.40292	0.000666709	0.00725578		Immp1l__chr2	2.98378	0.0347957
ENSG00000162407	PLPP3	368.133	-3.76475	0.79554	-4.73232	2.2197e-06	7.49409e-05		ENSG00000162391	FAM151A	81.7897	-3.76801	1.14083	-3.30286	0.000957026	0.00969788		Cenpl__chr1	2.97962	0.0361448
ENSG00000187889	C1orf168	98.2891	-5.84386	1.06246	-5.50032	3.79092e-08	2.5755e-06		ENSG00000184313	MROH7	62.7466	-2.87534	1.01305	-2.83829	0.00453553	0.0319401		Srd5a3__chr5	2.9701	0.0332942
ENSG00000157131	C8A	1046.71	-4.15171	0.765322	-5.42478	5.80257e-08	3.61952e-06		ENSG00000162402	USP24	74.132	-2.89751	1.09042	-2.65724	0.00787834	0.0486444		Adal__chr2	2.96119	0.0390963
ENSG00000021852	C8B	1069.12	-5.54223	0.776194	-7.14027	9.31481e-13	2.45098e-10		ENSG00000162407	PLPP3	375.241	-3.59434	0.701173	-5.12618	2.95681e-07	1.26993e-05		Uhrf1__chr17	2.94788	0.0402844
ENSG00000134709	HOOK1	197.251	-3.1896	0.796977	-4.00212	6.27767e-05	0.00110707		ENSG00000187889	C1orf168	133.705	-5.85417	1.17169	-4.99635	5.84261e-07	2.26869e-05		Cdca3__chr6	2.93398	0.0156815
ENSG00000162599	NFIA	373.692	-6.18494	1.00775	-6.13735	8.39089e-10	1.00069e-07		ENSG00000157131	C8A	614.858	-2.40258	0.82133	-2.92523	0.00344199	0.0259846		Mki67__chr7	2.91987	0.0434452
ENSG00000132849	PATJ	165.647	-2.08409	0.8799	-2.36855	0.0178581	0.0864583		ENSG00000021852	C8B	898.338	-4.51979	0.889003	-5.08411	3.69361e-07	1.52688e-05		Ppm1m__chr9	2.914	0.0432842
ENSG00000132855	ANGPTL3	1784.86	-4.68049	0.626853	-7.46664	8.22655e-14	2.72096e-11		ENSG00000177606	JUN	146.803	-3.03394	0.847624	-3.57935	0.00034445	0.0043152		Sf3a1__chr11	2.90925	0.0339792
ENSG00000162434	JAK1	434.753	-3.53007	0.625779	-5.64108	1.68986e-08	1.27331e-06		ENSG00000134709	HOOK1	134.856	-2.1928	0.849973	-2.57985	0.00988427	0.0574611		Birc5__chr11	2.90461	0.00441222
ENSG00000198160	MIER1	108.988	-3.37754	0.87131	-3.87639	0.000106018	0.00168017		ENSG00000134716	CYP2J2	291.533	-1.9762	0.715045	-2.76374	0.00571436	0.0376827		Apcs__chr1	2.89121	5.57e-05
ENSG00000116704	SLC35D1	358.734	-2.28073	0.827294	-2.75685	0.00583606	0.0380261		ENSG00000162599	NFIA	268.432	-6.28967	1.04884	-5.99676	2.01294e-09	1.81938e-07		Fam172a__chr13	2.88623	0.0431986
ENSG00000172380	GNG12	230.45	-2.36757	0.777671	-3.04444	0.00233111	0.0190405		ENSG00000132855	ANGPTL3	943.093	-3.57767	0.708457	-5.04995	4.41917e-07	1.81743e-05		1700024P16Rik__chr4	2.87421	0.0458339
ENSG00000116729	WLS	143.684	-5.24638	0.839881	-6.24658	4.19532e-10	5.34968e-08		ENSG00000162434	JAK1	233.175	-2.36031	0.759299	-3.10854	0.00188014	0.0164298		Prom1__chr5	2.87192	0.034667
ENSG00000116754	SRSF11	509.184	-2.51308	0.68126	-3.68887	0.000225257	0.00309112		ENSG00000116704	SLC35D1	405.792	-2.37719	0.66621	-3.56822	0.000359408	0.0044676		Abhd2__chr7	2.86353	0.0464887
ENSG00000116761	CTH	146.101	-3.11469	1.01754	-3.06101	0.00220594	0.0182202		ENSG00000024526	DEPDC1	13.0186	7.0426	2.53421	2.77901	0.0054525	0.0364517		Ubxn8__chr8	2.85944	0.0424119
ENSG00000117054	ACADM	450.426	-2.19385	0.850721	-2.57881	0.00991422	0.0560753		ENSG00000116754	SRSF11	453.1	-2.14727	0.663289	-3.23731	0.00120664	0.011671		Lsm2__chr17	2.85924	0.0380145
ENSG00000162613	FUBP1	200.973	-2.02346	0.747129	-2.70831	0.00676258	0.0424152		ENSG00000116761	CTH	233.175	-2.89524	0.991798	-2.91918	0.00350948	0.0263714		Trappc13__chr13	2.85903	0.0395047
ENSG00000162616	DNAJB4	61.7653	-2.77959	0.96782	-2.87201	0.00407868	0.0290431		ENSG00000137959	IFI44L	13.917	-6.87237	2.51933	-2.72785	0.00637481	0.0411061		Prmt10__chr8	2.85849	0.0473018
ENSG00000137960	GIPC2	83.7464	-2.01313	0.865138	-2.32694	0.0199682	0.0935065		ENSG00000174021	GNG5	1030.32	1.74774	0.613892	2.84698	0.00441358	0.0313258		Ifih1__chr2	2.84402	0.0467984
ENSG00000137959	IFI44L	29.7505	-8.35442	2.04615	-4.08299	4.44592e-05	0.000839348		ENSG00000142871	CYR61	169.721	-4.14691	1.09893	-3.77359	0.000160917	0.00235315		Mt2__chr8	2.84353	0.0061381
ENSG00000137965	IFI44	37.8209	-4.06187	1.25877	-3.22686	0.00125159	0.0119139		ENSG00000122417	ODF2L	106.479	-2.97444	0.874482	-3.40137	0.00067049	0.00728208		Stam2__chr2	2.83586	0.0432827
ENSG00000162618	ADGRL4	55.1447	-5.73173	1.32762	-4.3173	1.57947e-05	0.000364156		ENSG00000065243	PKN2	86.579	-2.14135	0.891323	-2.40244	0.0162861	0.0821648		Tceal8__chrX	2.82943	0.0104791
ENSG00000142875	PRKACB	96.6651	-2.23894	0.8011	-2.79483	0.00519273	0.0350203		ENSG00000117228	GBP1	161.397	-4.93486	0.907382	-5.43857	5.37099e-08	3.01492e-06		Abcb10__chr8	2.82604	0.0466262
ENSG00000117151	CTBS	183.592	-1.59449	0.664328	-2.40015	0.0163885	0.0807345		ENSG00000162645	GBP2	59.0936	-4.47948	1.15758	-3.86968	0.000108979	0.00172619		Arl3__chr19	2.82206	0.045587
ENSG00000153904	DDAH1	468.419	-1.57077	0.634218	-2.4767	0.0132603	0.0691246		ENSG00000213512	GBP7	56.5568	-4.97379	1.3424	-3.70514	0.000211274	0.00295193		Vps26b__chr9	2.81996	0.0402175
ENSG00000142871	CYR61	141.46	-4.06697	1.26544	-3.21387	0.00130959	0.0122928		ENSG00000122484	RPAP2	313.846	-2.24988	0.684671	-3.28607	0.00101594	0.0102006		Pold4__chr19	2.81296	0.0447124
ENSG00000171502	COL24A1	5.9937	6.30025	2.41209	2.61195	0.00900278	0.052145		ENSG00000067208	EVI5	136.621	-2.28639	0.797579	-2.86667	0.00414815	0.0298659		Otud1__chr2	2.80674	0.0475475
ENSG00000122417	ODF2L	116.132	-3.22313	0.858902	-3.75262	0.000174999	0.00250731		ENSG00000122406	RPL5	10358.3	2.88826	0.582305	4.96005	7.04762e-07	2.64199e-05		Mgme1__chr2	2.80442	0.0491676
ENSG00000117226	GBP3	25.9933	-5.76125	1.4472	-3.98096	6.86377e-05	0.0011803		ENSG00000137962	ARHGAP29	124.079	-2.95004	0.845302	-3.48992	0.000483161	0.00565201		Pir__chrX	2.78517	0.0494147
ENSG00000117228	GBP1	132.397	-4.39895	0.85775	-5.12848	2.92094e-07	1.44538e-05		ENSG00000143036	SLC44A3	24.6824	4.45937	1.5372	2.90097	0.0037201	0.0275146		Tm6sf2__chr8	2.78371	9.71e-05
ENSG00000162645	GBP2	105.703	-5.45939	0.851661	-6.41029	1.45246e-10	2.16913e-08		ENSG00000117519	CNN3	834.096	1.66408	0.697813	2.3847	0.017093	0.0852309		Ttc9c__chr19	2.7705	0.0425155
ENSG00000213512	GBP7	91.8393	-5.54542	1.1302	-4.90658	9.26802e-07	3.7381e-05		ENSG00000152078	TMEM56	449.959	-2.85828	0.72106	-3.96399	7.37068e-05	0.00124525		Mtmr6__chr14	2.76151	0.0454701
ENSG00000162654	GBP4	143.099	-1.91129	0.689727	-2.77108	0.00558701	0.0367523		ENSG00000188641	DPYD	218.347	-4.57881	1.00606	-4.55125	5.3328e-06	0.00013963		Tk1__chr11	2.74456	0.0156882
ENSG00000162664	ZNF326	95.9247	-1.90561	0.697193	-2.73325	0.00627124	0.0401074		ENSG00000099260	PALMD	79.4912	-5.65856	1.16966	-4.8378	1.31287e-06	4.43398e-05		Spryd4__chr10	2.74356	0.0135529
ENSG00000122482	ZNF644	165.869	-2.5377	0.7807	-3.25054	0.00115185	0.0111532		ENSG00000181656	GPR88	22.1815	-3.79753	1.61904	-2.34554	0.0189993	0.0921009		Pdhx__chr2	2.74141	0.0496994
ENSG00000122484	RPAP2	367.498	-2.65605	0.855317	-3.10534	0.00190063	0.0163078		ENSG00000162692	VCAM1	87.2149	-4.14702	0.981506	-4.22516	2.38771e-05	0.000490355		1810055G02Rik__chr19	2.71793	0.046173
ENSG00000067208	EVI5	171.717	-2.80259	0.668465	-4.19257	2.75813e-05	0.000573669		ENSG00000170989	S1PR1	203.471	-4.38814	0.837038	-5.24246	1.58446e-07	7.56662e-06		Stmn1__chr4	2.70287	0.00157446
ENSG00000122406	RPL5	7788.76	2.23123	0.799645	2.79028	0.00526623	0.035303		ENSG00000185946	RNPC3	167.508	-2.04641	0.767447	-2.66652	0.0076642	0.0475424		Memo1__chr17	2.69718	0.0160375
ENSG00000117500	TMED5	518.455	-2.13459	0.768355	-2.77813	0.00546735	0.0361661		ENSG00000198890	PRMT6	63.0548	2.90043	1.03101	2.8132	0.0049051	0.0336934		Gas7__chr11	2.68915	0.044262
ENSG00000137962	ARHGAP29	126.804	-3.14033	0.674285	-4.65727	3.20427e-06	9.92845e-05		ENSG00000213366	GSTM2	497.251	-1.77831	0.733953	-2.42292	0.0153963	0.0790451		Parp12__chr6	2.67509	0.014507
ENSG00000152078	TMEM56	631.814	-3.74733	0.631881	-5.93044	3.02116e-09	3.0725e-07		ENSG00000134184	GSTM1	1026.11	-2.15611	0.718579	-3.00052	0.00269518	0.0215451		Shmt1__chr11	2.64747	0.0182957
ENSG00000271092	TMEM56-RWDD3	87.3642	-2.26335	0.781665	-2.89554	0.00378502	0.0274232		ENSG00000198758	EPS8L3	150.883	5.77036	1.48661	3.88155	0.000103792	0.00165715		Cenpw__chr10	2.64664	0.0217621
ENSG00000122481	RWDD3	58.0107	-2.31221	0.849205	-2.72279	0.00647331	0.0410199		ENSG00000143119	CD53	39.7564	-3.30828	1.29406	-2.55652	0.0105724	0.0601012		Dopey2__chr16	2.64288	0.000329229
ENSG00000188641	DPYD	263.301	-4.84438	0.918429	-5.27463	1.33024e-07	7.52607e-06		ENSG00000143110	C1orf162	39.5953	-7.44966	1.74772	-4.2625	2.0215e-05	0.000425723		Cdkn1a__chr17	2.64063	0.0152367
ENSG00000099260	PALMD	73.3656	-5.53358	1.17469	-4.71068	2.46896e-06	8.11213e-05		ENSG00000155366	RHOC	1326.96	1.99008	0.616733	3.22681	0.00125179	0.012012		Fndc3b__chr3	2.6167	0.0125685
ENSG00000162688	AGL	220.894	-2.92702	0.816183	-3.58622	0.000335503	0.00432476		ENSG00000271810	AL603832.3	505.896	2.61612	0.646779	4.04484	5.23579e-05	0.000945396		Pik3c2g__chr6	2.61349	0.0310225
ENSG00000181656	GPR88	38.0541	-4.95464	1.26162	-3.92719	8.59455e-05	0.00140922		ENSG00000081026	MAGI3	44.8694	-2.75263	1.13778	-2.41931	0.0155501	0.0795302		Cpsf3__chr12	2.60606	0.0183492
ENSG00000170989	S1PR1	121.062	-3.68553	0.747833	-4.92829	8.29538e-07	3.44591e-05		ENSG00000134242	PTPN22	11.7632	-5.68909	2.30328	-2.47	0.0135115	0.0720762		Mrps22__chr9	2.59858	0.00308301
ENSG00000185946	RNPC3	169.434	-2.25833	0.921112	-2.45174	0.0142167	0.0728277		ENSG00000163349	HIPK1	78.1999	-2.56508	0.937419	-2.73633	0.00621293	0.0403714		Slc16a7__chr10	2.59514	0.00920193
ENSG00000198758	EPS8L3	90.9021	8.46892	1.33285	6.354	2.09793e-10	2.87417e-08		ENSG00000197323	TRIM33	85.5892	-2.24403	0.90549	-2.47825	0.013203	0.070832		Krt8__chr15	2.56051	0.000149097
ENSG00000184371	CSF1	76.6469	-3.3516	0.858612	-3.90351	9.4808e-05	0.00152586		ENSG00000173212	MAB21L3	123.092	-2.79701	0.851623	-3.28433	0.00102225	0.0102341		Coq9__chr8	2.55061	0.0214349
ENSG00000168710	AHCYL1	393.671	-1.97694	0.710397	-2.78287	0.00538805	0.0358659		ENSG00000163399	ATP1A1	1675.56	2.57776	0.671215	3.84045	0.000122811	0.00188734		Steap4__chr5	2.53743	0.000229241
ENSG00000143119	CD53	46.7125	-3.33091	1.29606	-2.57004	0.0101688	0.057045		ENSG00000116824	CD2	38.7037	-8.60085	1.9471	-4.41726	9.99582e-06	0.000236558		9430016H08Rik__chr1	2.537	0.00131521
ENSG00000143110	C1orf162	43.1365	-7.5783	1.5255	-4.96773	6.77409e-07	2.89418e-05		ENSG00000198162	MAN1A2	131.464	-2.38874	0.812851	-2.93872	0.00329574	0.0251432		Rgn__chrX	2.52285	1.71e-06
ENSG00000121933	TMIGD3	24.5408	-8.07289	1.83579	-4.39751	1.095e-05	0.000270923		ENSG00000183508	FAM46C	41.3764	-5.20546	1.50677	-3.45472	0.000550864	0.0062413		Ccl9__chr11	2.49188	6.36e-05
ENSG00000282608	ADORA3	22.3578	-7.95607	2.23825	-3.55459	0.00037857	0.00475529		ENSG00000065183	WDR3	323.86	2.47537	0.707238	3.50005	0.000465165	0.00549204		Aco2__chr15	2.48651	0.017406
ENSG00000171385	KCND3	92.6515	-4.20328	1.10789	-3.79397	0.000148258	0.00218655		ENSG00000092607	TBX15	42.1603	-3.04675	1.30763	-2.32998	0.0198072	0.0949298		Cyp3a59__chr5	2.46286	0.0381432
ENSG00000155366	RHOC	1005.74	1.70403	0.665794	2.5594	0.0104853	0.0582445		ENSG00000116882	HAO2	300.953	-9.80817	1.32068	-7.42661	1.11415e-13	2.31482e-11		Mcm7__chr5	2.45842	0.00253239
ENSG00000271810	AL603832.3	377.382	2.1282	0.710991	2.99329	0.0027599	0.0216521		ENSG00000203857	HSD3B1	10.89	6.88869	2.6684	2.58159	0.00983477	0.0572341		Gosr2__chr11	2.4573	0.0222703
ENSG00000081026	MAGI3	87.6622	-3.96061	0.988814	-4.00542	6.19075e-05	0.00109876		ENSG00000134193	REG4	798.037	5.45582	1.17455	4.64502	3.40051e-06	9.74935e-05		Akr1d1__chr6	2.44647	0.00466111
ENSG00000081019	RSBN1	22.5433	-3.43938	1.23845	-2.77717	0.00548338	0.0362421		ENSG00000134250	NOTCH2	205.44	-4.15337	0.952965	-4.35836	1.31039e-05	0.000299053		Gfm1__chr3	2.43825	0.0265043
ENSG00000134242	PTPN22	13.1351	-5.8928	1.93287	-3.04873	0.00229812	0.0188407		ENSG00000263353	PPIAL4A	72.7483	3.28634	0.975557	3.36868	0.0007553	0.00802632		S100a11__chr3	2.43632	0.0154736
ENSG00000163349	HIPK1	168.108	-3.80707	0.857674	-4.43883	9.04494e-06	0.000232102		ENSG00000198019	FCGR1B	11.653	-5.53218	2.40365	-2.30157	0.0213594	0.0999545		Lin7c__chr2	2.42865	0.00836251
ENSG00000197323	TRIM33	104.149	-2.68264	0.708794	-3.7848	0.000153832	0.00225326		ENSG00000271567	PPIAL4E	62.6074	2.97414	0.994897	2.9894	0.00279529	0.0221272		H2afz__chr3	2.42016	5.02e-05
ENSG00000173212	MAB21L3	168.669	-3.192	1.09582	-2.9129	0.00358094	0.0263711		ENSG00000279782	PPIAL4F	47.6681	3.45608	1.1146	3.10074	0.00193037	0.0167775		Necab1__chr4	2.41134	0.00287676
ENSG00000163399	ATP1A1	1193.94	2.47735	0.805324	3.07621	0.00209649	0.0175225		ENSG00000256374	PPIAL4D	54.3775	3.31175	1.06182	3.11892	0.00181514	0.0159993		Banf1__chr19	2.40286	0.000814305
ENSG00000198162	MAN1A2	230.866	-3.43457	0.709495	-4.84087	1.29275e-06	4.92856e-05		ENSG00000162825	NBPF20	450.536	-3.93171	0.671577	-5.85445	4.78586e-09	3.77164e-07		Sdr39u1__chr14	2.39431	0.0303413
ENSG00000183508	FAM46C	29.2306	-4.34441	1.6196	-2.68239	0.00730974	0.0448957		ENSG00000131788	PIAS3	223.31	2.56202	0.74494	3.43923	0.000583377	0.00652192		Rrm2__chr12	2.38382	0.00955591
ENSG00000065183	WDR3	230.327	2.31148	0.626851	3.68744	0.00022652	0.00310545		ENSG00000265241	RBM8A	1130.79	1.96269	0.654711	2.99779	0.00271941	0.0216625		Sec23b__chr2	2.37175	0.0251759
ENSG00000092607	TBX15	90.6584	-4.64425	1.40635	-3.30233	0.00095884	0.00970329		ENSG00000265972	TXNIP	669.659	-2.53351	0.944461	-2.6825	0.00730752	0.0457721		Arfip1__chr3	2.36161	0.0136923
ENSG00000116882	HAO2	153.417	-9.4159	1.60499	-5.86665	4.44693e-09	4.16479e-07		ENSG00000168509	HFE2	727.595	-3.4211	0.631197	-5.42001	5.95942e-08	3.29892e-06		Sec24a__chr11	2.36023	0.00881242
ENSG00000203857	HSD3B1	7.32577	5.5134	2.12027	2.60032	0.00931358	0.0535709		ENSG00000271425	NBPF10	313.988	-4.05241	0.703372	-5.7614	8.34215e-09	6.09191e-07		Mlx__chr11	2.35869	0.0324804
ENSG00000134193	REG4	578.364	3.78756	1.21035	3.12931	0.00175217	0.01536		ENSG00000213240	AC239799.1	130.509	-3.74238	0.838874	-4.46119	8.15052e-06	0.000200295		Tuba1c__chr15	2.35654	0.000265954
ENSG00000134250	NOTCH2	142.945	-3.242	0.94997	-3.41274	0.000643132	0.0071154		ENSG00000264343	NOTCH2NL	268.382	-5.387	0.788808	-6.8293	8.53318e-12	1.30013e-09		Mrpl28__chr17	2.3539	0.0363262
ENSG00000273136	NBPF26	56.3974	-2.30627	0.90444	-2.54994	0.0107741	0.0594153		ENSG00000268043	NBPF12	167.599	-2.39792	0.791862	-3.0282	0.00246016	0.0203018		Ehhadh__chr16	2.35041	0.0253709
ENSG00000263353	PPIAL4A	48.5412	3.48732	0.939525	3.71179	0.000205798	0.00287406		ENSG00000131791	PRKAB2	244.161	-2.33925	0.787571	-2.97021	0.00297594	0.0232808		Commd1__chr11	2.34429	0.0122735
ENSG00000198019	FCGR1B	22.6135	-6.23534	2.0991	-2.97049	0.00297327	0.0228079		ENSG00000236334	PPIAL4G	424.031	2.95784	0.659968	4.4818	7.40173e-06	0.0001856		Tgm2__chr2	2.33644	0.00114279
ENSG00000271567	PPIAL4E	42.1678	3.17866	0.920209	3.45428	0.00055176	0.00634735		ENSG00000270629	NBPF14	365.515	-3.16329	0.7079	-4.46855	7.87515e-06	0.000195026		Ahr__chr12	2.33111	0.0368225
ENSG00000279782	PPIAL4F	30.9868	4.00018	1.00307	3.98795	6.66474e-05	0.00115325		ENSG00000269713	NBPF9	256.928	-2.98742	0.721687	-4.1395	3.48071e-05	0.00067333		Cenpa__chr5	2.32694	0.0151876
ENSG00000256374	PPIAL4D	36.3285	3.50614	0.982454	3.56876	0.000358674	0.00455613		ENSG00000271383	NBPF19	326.132	-3.59317	0.699902	-5.13381	2.83932e-07	1.24108e-05		Anp32b__chr4	2.32593	0.0283766
ENSG00000162825	NBPF20	310.437	-3.45369	0.751818	-4.59378	4.35295e-06	0.000128168		ENSG00000263464	PPIAL4C	383.333	3.23577	0.669704	4.83164	1.35412e-06	4.56067e-05		Zfp217__chr2	2.3164	0.0320383
ENSG00000131788	PIAS3	136.767	3.68775	1.16809	3.15707	0.00159361	0.0143085		ENSG00000150337	FCGR1A	18.3418	-7.38306	2.28674	-3.22865	0.00124377	0.0119578		Dmd__chrX	2.29182	0.0491446
ENSG00000198483	ANKRD35	16.9329	-7.54852	2.42294	-3.11544	0.0018367	0.0158901		ENSG00000270882	HIST2H4A	120.978	4.26463	0.931255	4.57944	4.66225e-06	0.000125567		Mapkapk5__chr5	2.2879	0.0322005
ENSG00000265241	RBM8A	807.866	1.93348	0.727544	2.65754	0.0078713	0.0472763		ENSG00000203812	HIST2H2AA3	446.566	2.54344	0.85884	2.96148	0.00306163	0.0237882		Casp6__chr3	2.28745	0.0103225
ENSG00000272031	ANKRD34A	8.15832	6.7344	2.43717	2.76321	0.00572361	0.0374626		ENSG00000184678	HIST2H2BE	129.959	2.15611	0.890947	2.42002	0.0155195	0.0794629		Fkbp9__chr6	2.28001	0.0366382
ENSG00000168509	HFE2	509.736	-2.90553	0.945426	-3.07325	0.00211741	0.0176295		ENSG00000272196	HIST2H2AA4	464.937	2.42996	0.823717	2.95	0.00317777	0.0244856		Nudt18__chr14	2.26774	0.0363697
ENSG00000271425	NBPF10	227.534	-3.63998	0.754444	-4.82472	1.40202e-06	5.23452e-05		ENSG00000270276	HIST2H4B	117.354	3.98247	0.896933	4.44009	8.99199e-06	0.000216647		Zfp664__chr5	2.25354	0.0413884
ENSG00000213240	AC239799.1	50.121	-2.31547	0.819034	-2.82708	0.00469752	0.0323652		ENSG00000143368	SF3B4	586.594	2.15007	0.883168	2.43449	0.0149128	0.0771835		Dnaja2__chr8	2.24525	0.002284
ENSG00000264343	NOTCH2NL	87.3943	-3.68035	0.818542	-4.49622	6.91719e-06	0.000185833		ENSG00000266472	MRPS21	1323.5	2.47178	0.655711	3.76961	0.0001635	0.00237572		Eci1__chr17	2.23655	0.038225
ENSG00000270339	AC243756.1	8.48787	5.73132	2.01928	2.8383	0.00453547	0.0315026		ENSG00000143382	ADAMTSL4	85.2131	-3.90414	0.983804	-3.96841	7.23537e-05	0.00122878		Avpi1__chr19	2.22106	0.0460706
ENSG00000268043	NBPF12	106.897	-1.92139	0.694509	-2.76654	0.00566538	0.0371646		ENSG00000163131	CTSS	203.261	-2.78236	0.744216	-3.73865	0.000185012	0.00262861		Mrpl51__chr6	2.21425	0.0361838
ENSG00000116128	BCL9	44.3061	3.00437	0.969918	3.09755	0.00195128	0.0166477		ENSG00000143437	ARNT	188.505	-2.01862	0.791715	-2.54968	0.0107823	0.0608661		Tuba1b__chr15	2.21058	6.15e-05
ENSG00000236334	PPIAL4G	283.814	3.18319	0.616293	5.16506	2.40366e-07	1.21851e-05		ENSG00000143442	POGZ	201.109	-1.96917	0.729428	-2.69961	0.00694206	0.0438622		Skap2__chr6	2.21035	0.0407705
ENSG00000270629	NBPF14	222.798	-2.44211	0.724992	-3.36847	0.000755862	0.00804748		ENSG00000143375	CGN	124.693	-1.88674	0.811202	-2.32585	0.0200264	0.0956367		Dars__chr1	2.20936	0.0367371
ENSG00000269713	NBPF9	170.3	-2.48197	0.862583	-2.87737	0.00401006	0.0286482		ENSG00000143365	RORC	405.393	-2.83705	0.846539	-3.35136	0.000804167	0.00843058		Alg2__chr4	2.19981	0.0420952
ENSG00000271383	NBPF19	172.755	-2.67765	0.746777	-3.58561	0.000336293	0.0043313		ENSG00000197747	S100A10	5513.36	3.35724	0.621973	5.39772	6.74934e-08	3.67265e-06		Aip__chr19	2.17486	0.032001
ENSG00000263464	PPIAL4C	257.862	3.35584	0.804948	4.16901	3.0592e-05	0.000624537		ENSG00000203783	PRR9	44.4068	5.4842	1.87391	2.92661	0.00342678	0.0259082		Spcs3__chr8	2.16996	0.0425218
ENSG00000270882	HIST2H4A	95.4066	2.41243	0.90382	2.66915	0.00760438	0.0462522		ENSG00000163220	S100A9	15381.2	7.5648	0.8809	8.58758	8.8823e-18	3.84051e-15		Cse1l__chr2	2.16512	0.0496684
ENSG00000203812	HIST2H2AA3	315.269	2.78902	0.848937	3.28531	0.0010187	0.0101571		ENSG00000143546	S100A8	26.5879	-8.12216	2.10398	-3.86038	0.000113211	0.00177229		Fmo5__chr3	2.16118	2.44e-07
ENSG00000272196	HIST2H2AA4	331.138	2.69239	0.863822	3.11683	0.00182804	0.0158408		ENSG00000143556	S100A7	22.5163	6.84456	2.22348	3.07831	0.00208182	0.0178387		Rnf144b__chr13	2.14599	0.0369262
ENSG00000270276	HIST2H4B	86.3524	2.82269	0.907535	3.11028	0.0018691	0.0160956		ENSG00000197956	S100A6	2008.57	2.74668	0.969561	2.83291	0.00461261	0.0322661		Cpox__chr16	2.13955	0.00384165
ENSG00000143368	SF3B4	383.836	2.93384	0.854889	3.43183	0.000599515	0.00676987		ENSG00000196154	S100A4	189.656	-2.36357	0.975536	-2.42284	0.0153995	0.0790451		Gtf2a2__chr9	2.12966	0.0474629
ENSG00000266472	MRPS21	881.297	2.83862	0.734958	3.86228	0.000112333	0.00175342		ENSG00000188643	S100A16	2132.57	2.2236	0.623969	3.56363	0.000365759	0.00453355		Gins1__chr2	2.12882	0.00290396
ENSG00000163125	RPRD2	84.2842	-1.77401	0.741553	-2.3923	0.0167433	0.0822137		ENSG00000143553	SNAPIN	425.571	2.2177	0.676613	3.27766	0.00104673	0.0104383		Txnl1__chr18	2.12417	0.00480045
ENSG00000143374	TARS2	143.097	2.20239	0.922991	2.38615	0.0170259	0.0834286		ENSG00000143621	ILF2	906.688	2.87117	0.659413	4.35412	1.336e-05	0.000302887		Idh2__chr7	2.10901	0.0181337
ENSG00000143369	ECM1	67.2255	-4.25455	0.917901	-4.63509	3.56787e-06	0.000108522		ENSG00000143570	SLC39A1	543.359	2.17905	0.738513	2.9506	0.00317158	0.0244643		Mrps5__chr2	2.09902	0.0186654
ENSG00000143382	ADAMTSL4	37.9549	-2.57517	1.00435	-2.56401	0.010347	0.0578228		ENSG00000177954	RPS27	8326.7	2.14617	0.626124	3.42772	0.00060868	0.00675453		Bbox1__chr2	2.09438	0.000112278
ENSG00000163131	CTSS	235.885	-3.15774	0.739878	-4.26792	1.97302e-05	0.000438428		ENSG00000143549	TPM3	2166.87	2.27851	0.632319	3.60342	0.000314061	0.00404863		Apoa4__chr9	2.08568	0.00667544
ENSG00000143412	ANXA9	200.739	-2.43229	0.917154	-2.65199	0.00800179	0.0478347		ENSG00000143612	C1orf43	1851.93	1.99458	0.751437	2.65435	0.00794605	0.0489506		Serpina3n__chr12	2.04876	0.00072316
ENSG00000163154	TNFAIP8L2	14.3145	-5.98668	1.80071	-3.32463	0.000885364	0.00908773		ENSG00000160712	IL6R	388.895	-2.44169	0.680457	-3.58831	0.000332831	0.00422926		Shmt2__chr10	2.04597	0.0145109
ENSG00000159352	PSMD4	1212.54	2.23736	0.876494	2.55262	0.0106916	0.059039		ENSG00000160714	UBE2Q1	105.351	-2.23237	0.84601	-2.63871	0.00832222	0.0505655		Dusp12__chr1	2.03416	0.0160901
ENSG00000143373	ZNF687	229.573	2.33939	0.847398	2.76068	0.00576816	0.0376452		ENSG00000160691	SHC1	3422.77	1.66775	0.589084	2.8311	0.00463889	0.032401		Gstm7__chr3	2.03066	0.00709683
ENSG00000143375	CGN	105.024	-1.76215	0.72958	-2.41529	0.0157225	0.0783177		ENSG00000173207	CKS1B	902.145	3.18083	0.718251	4.42857	9.48585e-06	0.000226162		Oat__chr7	2.02378	0.033868
ENSG00000143367	TUFT1	45.0348	2.3385	0.937798	2.49361	0.0126453	0.0668222		ENSG00000143537	ADAM15	963.231	3.12256	0.651574	4.79233	1.64858e-06	5.40291e-05		Hmgn2__chr4	2.02164	0.00075861
ENSG00000143450	OAZ3	49.9716	2.17046	0.804406	2.69821	0.00697137	0.0433312		ENSG00000243364	EFNA4	150.573	3.38329	1.07665	3.14243	0.00167549	0.0151191		Eif2s1__chr12	2.01825	0.000344286
ENSG00000197747	S100A10	3585.02	4.43884	0.952828	4.65859	3.18378e-06	9.88342e-05		ENSG00000251246	AL691442.1	17.6902	5.66949	2.05085	2.76446	0.00570171	0.0376598		Dnajc12__chr10	2.01456	0.0455167
ENSG00000163220	S100A9	10248.2	6.28732	1.50522	4.17702	2.95352e-05	0.000605198		ENSG00000169242	EFNA1	1512.89	-1.5284	0.62591	-2.44189	0.0146106	0.0761124		Tmem176a__chr6	2.01108	1.31e-05
ENSG00000163221	S100A12	14.6804	-7.33669	2.77729	-2.64167	0.00824991	0.0488948		ENSG00000169241	SLC50A1	533.473	2.15719	0.747484	2.88594	0.00390251	0.0285079		Bhmt2__chr13	2.00897	0.0481411
ENSG00000143546	S100A8	90.7664	-9.96542	2.0232	-4.92558	8.41089e-07	3.46834e-05		ENSG00000273088	AL713999.1	1297.39	1.42296	0.605124	2.35152	0.0186969	0.0910361		Cbr1__chr16	2.00527	0.000337529
ENSG00000143556	S100A7	14.3584	7.5717	2.19659	3.44702	0.0005668	0.0064799		ENSG00000143630	HCN3	197.261	-2.37093	0.810335	-2.92586	0.00343505	0.0259584		Dynll1__chr5	2.00366	0.000174762
ENSG00000197956	S100A6	1392.97	3.84198	1.17801	3.26142	0.00110857	0.0108545		ENSG00000143627	PKLR	620.9	-1.84768	0.65231	-2.83252	0.00461826	0.0322915		Dnaja3__chr16	1.97554	0.0106899
ENSG00000188643	S100A16	1544.2	2.10434	0.658	3.19808	0.00138345	0.0128191		ENSG00000160752	FDPS	8836.52	2.82843	0.596057	4.74524	2.0826e-06	6.55854e-05		Dera__chr6	1.96724	0.00636885
ENSG00000143553	SNAPIN	315.572	1.98549	0.760684	2.61014	0.00905048	0.0523664		ENSG00000160753	RUSC1	184.983	2.32284	0.807159	2.87779	0.00400466	0.0290288		Rpa2__chr4	1.96492	0.0415229
ENSG00000143621	ILF2	617.793	2.97778	0.920753	3.23407	0.00122039	0.0117006		ENSG00000116539	ASH1L	206.808	-3.22344	0.743871	-4.33333	1.4687e-05	0.000327041		Aprt__chr8	1.96044	0.0361524
ENSG00000169418	NPR1	27.1069	-6.67999	1.67711	-3.98304	6.80389e-05	0.00117243		ENSG00000125459	MSTO1	249.762	2.85503	0.95026	3.00447	0.00266045	0.0213838		Tubb5__chr17	1.95649	0.00273345
ENSG00000143614	GATAD2B	28.9936	-2.95708	1.09349	-2.70427	0.00684556	0.0427899		ENSG00000163479	SSR2	3826.97	3.16149	0.595963	5.30484	1.12772e-07	5.56828e-06		Ppa1__chr10	1.95485	0.00247101
ENSG00000177954	RPS27	5839.54	2.18342	0.717222	3.04427	0.00233245	0.0190405		ENSG00000196189	SEMA4A	34.1174	-7.06708	1.94725	-3.62925	0.000284243	0.00373859		Hsd17b4__chr18	1.95352	0.0220412
ENSG00000143549	TPM3	1545.22	2.20417	0.661644	3.33136	0.000864235	0.00893169		ENSG00000160781	PAQR6	32.9716	-5.04548	1.64975	-3.05833	0.00222576	0.0186819		Lyplal1__chr1	1.95248	0.0405575
ENSG00000163348	PYGO2	536.689	2.05282	0.886139	2.31659	0.0205261	0.0952847		ENSG00000163468	CCT3	3320.32	3.198	0.705539	4.5327	5.82347e-06	0.00015075		Cdkal1__chr13	1.93132	0.0124592
ENSG00000160691	SHC1	2149.82	2.56344	1.01844	2.51702	0.0118352	0.0635957		ENSG00000163382	NAXE	2452.15	1.99164	0.672163	2.96302	0.00304634	0.0237089		Hfe__chr13	1.92952	0.0085507
ENSG00000173207	CKS1B	611.386	3.24424	0.803001	4.04014	5.34183e-05	0.000975237		ENSG00000143319	ISG20L2	298.587	2.68915	0.716684	3.75221	0.000175283	0.00252174		Tob1__chr11	1.92325	0.015785
ENSG00000143537	ADAM15	649.192	3.25402	0.679462	4.78911	1.6752e-06	5.94641e-05		ENSG00000143321	HDGF	404.375	-1.62648	0.66004	-2.46421	0.0137317	0.0728776		Syap1__chrX	1.91789	0.038262
ENSG00000243364	EFNA4	100.73	3.65269	1.47108	2.483	0.0130281	0.0682092		ENSG00000143297	FCRL5	16.6644	-5.50602	2.04709	-2.68968	0.00715208	0.0449584		Csnk1d__chr11	1.91568	0.00520749
ENSG00000169241	SLC50A1	378.3	2.24775	0.766361	2.93301	0.00335689	0.0250889		ENSG00000073754	CD5L	75.0373	-6.59049	1.98459	-3.32083	0.000897513	0.00921592		Gstm2__chr3	1.90357	0.0182731
ENSG00000163463	KRTCAP2	974.496	1.52058	0.574402	2.64724	0.00811507	0.0483724		ENSG00000163565	IFI16	44.9649	-4.3361	1.46979	-2.95015	0.00317617	0.0244856		Anapc1__chr2	1.89607	0.0430164
ENSG00000273088	AL713999.1	935.561	1.51116	0.588452	2.56803	0.0102278	0.0572791		ENSG00000132703	APCS	6209.48	-2.25731	0.93409	-2.41659	0.0156666	0.0799473		Kcnn2__chr18	1.88478	0.0438181
ENSG00000116521	SCAMP3	795.784	3.02395	0.884435	3.41907	0.000628346	0.00700948		ENSG00000132693	CRP	3913.25	-7.38185	1.11777	-6.60408	3.99982e-11	5.11912e-09		Tmprss2__chr16	1.8833	0.0297136
ENSG00000160752	FDPS	5600.67	3.70565	0.787859	4.70344	2.55816e-06	8.31501e-05		ENSG00000085552	IGSF9	92.0864	-3.52543	0.961438	-3.66683	0.000245579	0.00331821		Isca2__chr12	1.8784	0.0242932
ENSG00000160753	RUSC1	121.125	2.96715	1.00824	2.94289	0.00325166	0.024479		ENSG00000162729	IGSF8	581.455	2.01467	0.641209	3.14198	0.00167808	0.015133		Abhd17a__chr10	1.86929	0.0213942
ENSG00000116539	ASH1L	157.865	-2.93083	0.731285	-4.00779	6.12908e-05	0.00109132		ENSG00000162736	NCSTN	654.071	2.17254	0.723516	3.00276	0.00267542	0.0214329		Hacl1__chr14	1.8651	0.000402364
ENSG00000125459	MSTO1	188.475	2.13474	0.866289	2.46424	0.0137305	0.0709732		ENSG00000117091	CD48	10.2368	-6.79045	2.7201	-2.4964	0.0125462	0.0681652		Cyb5__chr18	1.86458	0.000112226
ENSG00000163479	SSR2	2558.58	3.3611	0.78441	4.28488	1.82841e-05	0.000412375		ENSG00000186517	ARHGAP30	38.3136	-4.88498	1.37397	-3.55538	0.00037743	0.00464471		Vps35__chr8	1.8626	0.0233877
ENSG00000163472	TMEM79	226.412	1.76364	0.705814	2.49874	0.0124637	0.0660518		ENSG00000143222	UFC1	695.284	1.89973	0.686554	2.76705	0.00565666	0.0374567		Ly6e__chr15	1.86069	0.00108933
ENSG00000198715	GLMP	560.691	2.50963	0.686084	3.6579	0.000254288	0.00339947		ENSG00000143258	USP21	378.017	2.66956	0.869531	3.07011	0.00213977	0.018228		Tmem242__chr17	1.85679	0.00628103
ENSG00000163468	CCT3	2324.81	2.91114	0.761016	3.82534	0.000130594	0.00197343		ENSG00000158850	B4GALT3	325.523	3.03392	0.752786	4.03026	5.57162e-05	0.00099815		Yaf2__chr15	1.84969	0.0173499
ENSG00000132677	RHBG	159.046	3.43399	1.24209	2.7647	0.00569759	0.0373611		ENSG00000158864	NDUFS2	2404.63	1.80351	0.601749	2.99712	0.00272547	0.0216926		Usp4__chr9	1.84654	0.0211991
ENSG00000163382	NAXE	1491.4	3.21579	0.824133	3.90203	9.539e-05	0.001533		ENSG00000158869	FCER1G	130.076	-3.45108	0.839476	-4.11099	3.93973e-05	0.000750331		Eif5a__chr11	1.84323	0.0198649
ENSG00000143319	ISG20L2	213.06	2.48707	0.776223	3.20406	0.00135502	0.0126334		ENSG00000158874	APOA2	253115	1.61362	0.583443	2.76568	0.00568041	0.0375517		Echdc3__chr2	1.83367	0.0292241
ENSG00000143321	HDGF	454.283	-2.01601	0.677495	-2.97569	0.00292332	0.02255		ENSG00000143257	NR1I3	306.935	-2.65571	0.703571	-3.77461	0.00016026	0.00234984		Slc23a1__chr18	1.82467	9.06e-05
ENSG00000143294	PRCC	148.848	1.95776	0.789502	2.47974	0.0131479	0.0686896		ENSG00000143252	SDHC	1821.95	2.17246	0.62983	3.44929	0.000562068	0.00632791		Hpx__chr7	1.8204	0.00684462
ENSG00000143297	FCRL5	14.2479	-5.27527	1.84461	-2.85983	0.00423873	0.0299256		ENSG00000188931	CFAP126	16.8804	-5.96182	2.1617	-2.75794	0.00581674	0.0382161		Aldh7a1__chr18	1.8108	0.000127859
ENSG00000073754	CD5L	107.936	-10.2161	2.08821	-4.89226	9.9687e-07	3.99157e-05		ENSG00000143226	FCGR2A	23.7141	-6.6076	1.97156	-3.35145	0.000803894	0.00843058		Ggact__chr14	1.79149	0.0320093
ENSG00000163563	MNDA	14.2	-7.28554	2.29151	-3.17937	0.00147597	0.0134902		ENSG00000203747	FCGR3A	27.8381	-6.81776	1.96046	-3.47764	0.000505853	0.00583464		Bloc1s1__chr10	1.79129	0.0453148
ENSG00000163565	IFI16	98.4402	-4.47647	1.30251	-3.43681	0.000588618	0.0066708		ENSG00000072694	FCGR2B	52.7176	-6.64313	1.65917	-4.0039	6.2307e-05	0.00109177		Coa6__chr8	1.78483	0.0139104
ENSG00000132693	CRP	16253.5	-7.3855	1.4093	-5.24056	1.6009e-07	8.78744e-06		ENSG00000132185	FCRLA	87.9229	-3.99509	1.45295	-2.74965	0.00596593	0.0389722		Iyd__chr10	1.77669	0.0111239
ENSG00000085552	IGSF9	95.1856	-3.28122	1.28924	-2.54509	0.0109251	0.0599603		ENSG00000081721	DUSP12	98.1359	2.66607	1.00199	2.66079	0.00779584	0.0482411		Glrx__chr13	1.75792	0.0225696
ENSG00000143315	PIGM	728.123	2.37865	0.966915	2.46005	0.0138919	0.0715812		ENSG00000198929	NOS1AP	51.3774	-4.03025	1.16698	-3.45357	0.000553216	0.00626352		Mpp7__chr18	1.75511	0.0395552
ENSG00000162729	IGSF8	339.776	3.57864	0.801942	4.46246	8.10231e-06	0.000211182		ENSG00000143228	NUF2	23.1968	4.67747	1.96569	2.37956	0.0173334	0.0861611		Tmem258__chr19	1.75471	0.0262611
ENSG00000162736	NCSTN	445.412	2.61688	1.00977	2.59156	0.00955431	0.0545768		ENSG00000143198	MGST3	929.248	1.8895	0.650731	2.90366	0.00368829	0.0273425		Tmem176b__chr6	1.74417	0.000268066
ENSG00000158773	USF1	53.4786	3.67612	1.05768	3.47563	0.000509653	0.00596226		ENSG00000143183	TMCO1	1842.33	2.29052	0.74721	3.06543	0.00217357	0.0184373		Nme2__chr11	1.73034	0.0144058
ENSG00000186517	ARHGAP30	39.0008	-5.2324	1.19163	-4.39095	1.12858e-05	0.000275935		ENSG00000152382	TADA1	773.17	2.6644	0.633933	4.20296	2.63447e-05	0.000532823		Yap1__chr9	1.72935	0.0266906
ENSG00000162755	KLHDC9	10.5395	6.06679	2.03814	2.97663	0.0029144	0.0225021		ENSG00000143190	POU2F1	86.4122	-2.13947	0.908691	-2.35445	0.0185501	0.0906811		Gspt1__chr16	1.71708	0.0364101
ENSG00000143222	UFC1	504.087	1.99118	0.784273	2.53888	0.0111207	0.0607407		ENSG00000143162	CREG1	931.359	2.78543	0.684191	4.07114	4.67842e-05	0.000865265		Clp1__chr2	1.69699	0.044242
ENSG00000143258	USP21	258.139	2.92723	0.857954	3.41187	0.000645178	0.00713008		ENSG00000143158	MPC2	4165.71	2.49992	0.631643	3.9578	7.56426e-05	0.00127248		Scfd1__chr12	1.68334	0.0186173
ENSG00000143224	PPOX	73.3486	2.31412	0.960379	2.40959	0.0159703	0.0791447		ENSG00000143164	DCAF6	718.754	1.82967	0.625901	2.92325	0.003464	0.0261032		Kpnb1__chr11	1.68135	0.00557773
ENSG00000158850	B4GALT3	257.377	2.0308	0.788997	2.5739	0.0100559	0.0565265		ENSG00000143153	ATP1B1	1971.27	1.82963	0.627088	2.91766	0.00352674	0.0264638		Hadh__chr3	1.67206	0.000397437
ENSG00000158864	NDUFS2	1537.49	2.51508	0.816797	3.0792	0.00207555	0.0173946		ENSG00000198734	F5	1678.65	-2.02746	0.736453	-2.75301	0.00590494	0.0387478		Por__chr5	1.66943	0.0175502
ENSG00000158869	FCER1G	218.573	-4.28851	1.08957	-3.93598	8.28585e-05	0.00136671		ENSG00000188404	SELL	32.4936	3.6506	1.47019	2.48308	0.0130253	0.0701377		Mtap__chr4	1.66555	0.0430551
ENSG00000158874	APOA2	145837	3.07263	0.760193	4.04191	5.30183e-05	0.000970071		ENSG00000007933	FMO3	809.999	-3.74197	0.663968	-5.63577	1.74278e-08	1.15211e-06		Stra13__chr11	1.66463	0.00918575
ENSG00000143257	NR1I3	332.622	-2.96429	1.03727	-2.85779	0.00426599	0.0300944		ENSG00000076258	FMO4	82.1609	-3.48989	0.949649	-3.67492	0.000237922	0.00323938		Ndufaf6__chr4	1.6603	0.0204611
ENSG00000143252	SDHC	1430.45	1.68252	0.670085	2.51091	0.012042	0.0644769		ENSG00000117523	PRRC2C	413.82	-2.21881	0.686238	-3.23329	0.00122373	0.0118006		Fam188a__chr2	1.65554	0.0214641
ENSG00000188931	CFAP126	9.25537	-5.3682	1.94684	-2.75739	0.00582643	0.0379806		ENSG00000135845	PIGC	348.845	2.88058	0.684363	4.20913	2.5635e-05	0.000522558		Tank__chr2	1.65128	0.0440465
ENSG00000143226	FCGR2A	14.2123	-5.9803	1.87717	-3.18581	0.00144351	0.0132425		ENSG00000135870	RC3H1	96.1114	-2.16527	0.87379	-2.47802	0.0132113	0.0708532		Txnrd1__chr10	1.63474	0.0140818
ENSG00000203747	FCGR3A	156.914	-9.2643	1.58629	-5.84025	5.21233e-09	4.80863e-07		ENSG00000116161	CACYBP	664.681	2.57748	0.688981	3.741	0.00018329	0.0026111		1810037I17Rik__chr3	1.63473	0.0485015
ENSG00000072694	FCGR2B	105.292	-7.39828	1.42985	-5.17415	2.2895e-07	1.17502e-05		ENSG00000120341	SEC16B	290.728	-2.69835	0.701736	-3.84526	0.000120427	0.00186228		Amacr__chr15	1.62435	7.32e-05
ENSG00000162747	FCGR3B	37.4476	-7.38113	1.64228	-4.49445	6.97501e-06	0.000186793		ENSG00000135837	CEP350	159.638	-2.70173	0.773669	-3.4921	0.000479232	0.00562078		Mrfap1__chr5	1.62245	0.00294123
ENSG00000198929	NOS1AP	28.4022	-3.09356	1.03492	-2.98918	0.00279728	0.0218522		ENSG00000230124	ACBD6	207.675	2.16936	0.787783	2.75376	0.00589149	0.0386754		Glud1__chr14	1.62214	0.000319939
ENSG00000162733	DDR2	38.7268	-3.72602	1.43633	-2.59412	0.00948342	0.0543591		ENSG00000162783	IER5	24.1697	-3.38346	1.45885	-2.31927	0.0203805	0.0968549		Afg3l2__chr18	1.61779	0.0232442
ENSG00000143248	RGS5	216.262	-4.74483	0.943655	-5.02814	4.95265e-07	2.23706e-05		ENSG00000135821	GLUL	20634.9	3.02218	0.993434	3.04215	0.00234894	0.0195415		Uso1__chr5	1.61713	0.014825
ENSG00000143198	MGST3	684.085	1.72402	0.627121	2.7491	0.0059759	0.038651		ENSG00000143333	RGS16	43.6645	-2.89542	1.1654	-2.4845	0.0129734	0.0698937		Edem1__chr6	1.61429	0.000146392
ENSG00000143195	ILDR2	5.79225	-5.99539	2.43655	-2.4606	0.0138704	0.0714953		ENSG00000162704	ARPC5	763.125	1.66755	0.648198	2.57259	0.010094	0.0583086		Cltc__chr11	1.60686	0.00432511
ENSG00000143190	POU2F1	73.0952	-1.97267	0.762836	-2.58596	0.00971079	0.0552043		ENSG00000143344	RGL1	104.511	-2.78106	0.854414	-3.25493	0.00113419	0.0111045		Aldh3a2__chr11	1.60422	0.0149507
ENSG00000143158	MPC2	3045.12	2.21349	0.662871	3.33925	0.000840048	0.00876761		ENSG00000198756	COLGALT2	10.8038	6.92689	2.66773	2.59655	0.00941644	0.0555268		Gpt2__chr8	1.60382	0.0183394
ENSG00000143196	DPT	10.6014	-6.86605	2.80249	-2.44998	0.0142864	0.073091		ENSG00000116679	IVNS1ABP	413.186	2.26585	0.834522	2.71514	0.00662472	0.0423929		Ciapin1__chr8	1.59864	0.0127124
ENSG00000143153	ATP1B1	1321.01	2.42245	0.740237	3.27253	0.00106589	0.0105425		ENSG00000116690	PRG4	2911.08	-6.67424	0.732972	-9.10573	8.56871e-20	4.56941e-17		Usmg5__chr19	1.59387	0.00819185
ENSG00000007908	SELE	19.4723	-4.46795	1.91966	-2.32747	0.0199403	0.0934584		ENSG00000047410	TPR	623.732	-2.58897	0.641195	-4.03773	5.39701e-05	0.000971219		Mrps14__chr1	1.58755	0.0119912
ENSG00000007933	FMO3	397.714	-2.49351	0.975626	-2.5558	0.0105943	0.0587364		ENSG00000116711	PLA2G4A	44.8325	7.02912	1.94234	3.6189	0.000295859	0.0038575		Bub3__chr7	1.58511	0.0177103
ENSG00000094963	FMO2	18.1395	-6.34359	1.74617	-3.63286	0.000280293	0.00369056		ENSG00000090104	RGS1	32.7669	-5.98126	1.60995	-3.71519	0.00020305	0.00285197		Atp6v1a__chr16	1.58232	0.00573401
ENSG00000076258	FMO4	41.5689	-2.46173	1.00124	-2.45869	0.0139444	0.0717653		ENSG00000023572	GLRX2	186.737	3.15266	0.764367	4.12454	3.71483e-05	0.000711735		Tmem179b__chr19	1.58185	0.0435646
ENSG00000117523	PRRC2C	435.395	-2.48941	0.614336	-4.0522	5.07377e-05	0.00094031		ENSG00000162687	KCNT2	40.3264	-4.59945	1.30762	-3.51743	0.000435753	0.00521015		Acot13__chr13	1.57987	0.0385621
ENSG00000135845	PIGC	238.985	2.91596	0.81419	3.58143	0.000341719	0.00438782		ENSG00000000971	CFH	4138.25	-2.52032	0.911813	-2.76407	0.00570852	0.0376598		Abhd3__chr18	1.57624	0.0162344
ENSG00000117586	TNFSF4	16.9396	4.89146	1.86003	2.62978	0.00854407	0.0501008		ENSG00000116785	CFHR3	403.253	-4.21186	0.709614	-5.93542	2.93092e-09	2.48089e-07		Pnkd__chr1	1.57407	0.0241525
ENSG00000135870	RC3H1	132.147	-2.81105	0.810337	-3.46899	0.000522424	0.00606034		ENSG00000276911	BX248415.1	1025.31	-3.17047	0.902462	-3.51313	0.000442859	0.00526364		Rps27l__chr9	1.56991	0.0288562
ENSG00000116161	CACYBP	524.95	1.82123	0.662814	2.74773	0.00600098	0.0387829		ENSG00000244414	CFHR1	2062.48	-2.23003	0.905427	-2.46296	0.0137795	0.0730432		Tbc1d15__chr10	1.55756	0.0149879
ENSG00000116194	ANGPTL1	16.0955	-7.46819	1.88712	-3.95745	7.57547e-05	0.00127104		ENSG00000134365	CFHR4	213.149	-5.7541	0.885209	-6.50027	8.01765e-11	9.37506e-09		Tat__chr8	1.55598	0.0105236
ENSG00000135837	CEP350	204.988	-3.21399	0.682684	-4.70786	2.50325e-06	8.16859e-05		ENSG00000080910	CFHR2	1008.19	-3.16774	0.887028	-3.57118	0.000355376	0.00442092		Mavs__chr2	1.55429	0.0440722
ENSG00000230124	ACBD6	131.048	2.99762	0.942049	3.18202	0.00146253	0.0133947		ENSG00000134389	CFHR5	333.327	-4.87779	1.16465	-4.18819	2.8119e-05	0.000563013		Gamt__chr10	1.5518	0.00385182
ENSG00000135821	GLUL	13441.2	4.6391	1.18003	3.93136	8.4467e-05	0.0013896		ENSG00000213047	DENND1B	84.0992	-2.89386	0.922241	-3.13786	0.00170186	0.0152614		Acly__chr11	1.5329	0.0418676
ENSG00000198756	COLGALT2	6.99652	6.52639	2.29533	2.84334	0.00446438	0.0311735		ENSG00000081237	PTPRC	51.2902	-5.25805	1.43317	-3.66882	0.000243672	0.00330082		Sec24d__chr3	1.51628	0.00279992
ENSG00000116690	PRG4	2858.4	-6.73408	0.64402	-10.4563	1.37074e-25	3.2461e-22		ENSG00000162702	ZNF281	187.624	-1.70547	0.740803	-2.30218	0.0213248	0.0999278		Ddc__chr11	1.51499	0.0385587
ENSG00000047410	TPR	595.564	-2.60603	0.701741	-3.71366	0.000204284	0.00286256		ENSG00000116857	TMEM9	1487.66	1.8111	0.622456	2.9096	0.00361896	0.0269543		Serpina3m__chr12	1.50468	0.00891112
ENSG00000162687	KCNT2	52.3239	-4.92069	1.02459	-4.80262	1.56603e-06	5.67685e-05		ENSG00000134375	TIMM17A	1335.31	2.27975	0.618674	3.6849	0.000228794	0.00314981		Dap__chr15	1.50284	0.00942542
ENSG00000000971	CFH	5101.76	-2.55248	0.895037	-2.85181	0.00434707	0.0305216		ENSG00000176393	RNPEP	504.368	2.48004	0.686226	3.61404	0.000301468	0.00391468		Ldha__chr7	1.50203	0.00751909
ENSG00000116785	CFHR3	1612.95	-6.43158	0.736483	-8.73283	2.48368e-18	2.16695e-15		ENSG00000143851	PTPN7	43.2171	-3.37063	1.15988	-2.90601	0.0036607	0.0271758		Cebpb__chr2	1.49833	0.0259073
ENSG00000276911	BX248415.1	1423.08	-3.45913	0.814274	-4.24811	2.15579e-05	0.000472864		ENSG00000077152	UBE2T	125.67	4.39931	0.934132	4.70951	2.48309e-06	7.46701e-05		Ppif__chr14	1.49598	0.0238102
ENSG00000244414	CFHR1	3494.25	-2.50696	0.948354	-2.64348	0.00820582	0.0486579		ENSG00000183155	RABIF	146.249	2.43633	0.946468	2.57413	0.0100491	0.0582064		Tbl1xr1__chr3	1.48977	0.0423343
ENSG00000134365	CFHR4	601.23	-7.26935	0.936246	-7.76435	8.20623e-15	3.67661e-12		ENSG00000159346	ADIPOR1	1476.67	2.20117	0.673449	3.2685	0.00108118	0.0106902		Gsta4__chr9	1.48591	0.026962
ENSG00000080910	CFHR2	1368.41	-3.46849	0.795932	-4.35777	1.31396e-05	0.000311609		ENSG00000133048	CHI3L1	1149.01	-2.60526	1.06135	-2.45465	0.0141021	0.0741443		Man2a1__chr17	1.48453	0.00948038
ENSG00000134389	CFHR5	340.737	-3.41351	1.152	-2.96311	0.00304545	0.0232112		ENSG00000122176	FMOD	111.583	5.75953	1.17125	4.91742	8.76903e-07	3.18111e-05		Litaf__chr16	1.4765	0.0460025
ENSG00000213047	DENND1B	55.706	-2.29527	0.875545	-2.62153	0.00875365	0.0510948		ENSG00000058668	ATP2B4	187.525	-3.69697	0.772758	-4.78413	1.71732e-06	5.57276e-05		Pcbd1__chr10	1.47107	0.00667772
ENSG00000081237	PTPRC	65.9055	-5.27274	1.58576	-3.32506	0.000883991	0.00908293		ENSG00000058673	ZC3H11A	416.769	-2.23418	0.657147	-3.39982	0.000674303	0.00731852		Ifitm3__chr7	1.45614	0.00115945
ENSG00000116833	NR5A2	179.243	-2.06391	0.719121	-2.87004	0.0041042	0.0291746		ENSG00000257315	ZBED6	319.997	-4.34208	0.771795	-5.62595	1.84491e-08	1.20742e-06		Cth__chr3	1.45592	0.0171346
ENSG00000162702	ZNF281	200.636	-2.00816	0.727114	-2.76183	0.00574784	0.0375866		ENSG00000182004	SNRPE	2562.59	3.67913	0.658498	5.58716	2.3081e-08	1.44238e-06		Snx3__chr10	1.45566	0.0289824
ENSG00000163362	C1orf106	61.7374	3.09967	1.18651	2.61243	0.00899001	0.0521166		ENSG00000196188	CTSE	688.096	5.96487	0.888425	6.71398	1.8939e-11	2.63466e-09		Nipsnap3b__chr4	1.45044	0.0259954
ENSG00000116857	TMEM9	990.978	2.44316	0.762932	3.20233	0.00136319	0.0126669		ENSG00000263961	C1orf186	99.7533	-2.4513	0.99111	-2.47329	0.0133877	0.0715352		Mpc1__chr17	1.4494	0.00547343
ENSG00000134375	TIMM17A	939.134	2.31054	0.727713	3.17507	0.00149798	0.0136011		ENSG00000162889	MAPKAPK2	55.2799	-2.6303	1.0372	-2.53596	0.011214	0.0626402		Atp5g2__chr15	1.44872	0.0403802
ENSG00000077152	UBE2T	78.9967	6.43873	1.43441	4.48875	7.1641e-06	0.000190625		ENSG00000123843	C4BPB	1007.83	-3.44985	0.630462	-5.47194	4.45131e-08	2.58015e-06		Cyp2c70__chr19	1.44358	0.0030219
ENSG00000159346	ADIPOR1	1017.88	2.51394	0.790716	3.17932	0.00147622	0.0134902		ENSG00000117335	CD46	1554.27	1.68484	0.638214	2.63992	0.00829245	0.05042		Hspe1__chr1	1.44152	0.00514609
ENSG00000159388	BTG2	54.1436	3.86993	1.09842	3.52317	0.00042641	0.00518369		ENSG00000117625	RCOR3	110.919	-1.94065	0.837296	-2.31775	0.0204627	0.0970553		Tubb2a__chr13	1.43337	0.0422809
ENSG00000188783	PRELP	60.2765	-2.65734	0.806451	-3.2951	0.00098385	0.00988302		ENSG00000162772	ATF3	130.241	-2.85609	0.886391	-3.22216	0.0012723	0.0121663		Adh1__chr3	1.43307	0.00599137
ENSG00000058668	ATP2B4	96.6893	-2.60876	0.968131	-2.69463	0.0070466	0.0436842		ENSG00000143494	VASH2	91.4259	3.12679	0.890271	3.51218	0.000444455	0.00527868		Aadat__chr8	1.42665	0.0273985
ENSG00000058673	ZC3H11A	384.333	-2.24176	0.68309	-3.28179	0.00103151	0.0102638		ENSG00000117707	PROX1	612.183	-4.41694	0.675502	-6.53875	6.20357e-11	7.57593e-09		Commd3__chr2	1.42537	0.0453643
ENSG00000257315	ZBED6	214.654	-3.9049	0.714192	-5.46758	4.56223e-08	2.94273e-06		ENSG00000042781	USH2A	60.912	-3.94564	1.42422	-2.77039	0.00559886	0.0371705		Lgals9__chr11	1.42459	0.0102333
ENSG00000182004	SNRPE	1751.16	3.40862	0.760188	4.48392	7.32845e-06	0.000194063		ENSG00000067704	IARS2	861.436	1.96016	0.690018	2.84073	0.00450099	0.031763		Mrps21__chr3	1.4228	0.00544882
ENSG00000143850	PLEKHA6	86.5289	-2.05974	0.758238	-2.71648	0.00659807	0.0415879		ENSG00000117791	2002-03-01	313.13	-2.42233	0.69254	-3.49775	0.000469205	0.00553157		Ran__chr5	1.41942	0.0103016
ENSG00000276600	RAB7B	4.85436	6.00515	2.61821	2.29361	0.0218128	0.0994586		ENSG00000143498	TAF1A	49.3212	2.71688	1.15836	2.34545	0.0190039	0.0921009		Apon__chr10	1.41767	0.0155924
ENSG00000196188	CTSE	438.046	7.17915	1.27954	5.61071	2.01496e-08	1.50459e-06		ENSG00000143753	DEGS1	422.804	3.42907	0.725308	4.72774	2.27031e-06	7.03885e-05		Aldh1a7__chr19	1.41702	0.0238506
ENSG00000266094	RASSF5	45.4165	-2.97153	1.21408	-2.44755	0.0143832	0.0734747		ENSG00000162923	WDR26	148.313	-2.04806	0.790244	-2.59168	0.0095508	0.0560094		Slc25a39__chr11	1.41294	0.0307078
ENSG00000162889	MAPKAPK2	53.4409	-2.67014	0.875407	-3.05017	0.00228714	0.01876		ENSG00000143742	SRP9	5541.32	4.00804	0.59444	6.74255	1.55631e-11	2.22303e-09		Fam162a__chr16	1.40254	0.0364951
ENSG00000123843	C4BPB	1332.42	-3.94994	0.68492	-5.76701	8.06907e-09	6.96672e-07		ENSG00000255835	AL117348.2	124.405	3.0991	0.861139	3.59884	0.00031964	0.00410073		Zfp207__chr11	1.40162	0.0194624
ENSG00000117335	CD46	1086.59	1.93963	0.746571	2.59805	0.00937548	0.0538708		ENSG00000143811	PYCR2	272.975	1.92096	0.739985	2.59595	0.00943304	0.0555472		Pter__chr2	1.40007	0.014525
ENSG00000117594	HSD11B1	752.252	-11.5916	1.45156	-7.98563	1.39802e-15	7.24216e-13		ENSG00000163041	H3F3A	8146.4	2.39077	0.591007	4.04524	5.22698e-05	0.000944873		Morf4l2__chrX	1.39141	0.0127236
ENSG00000170385	SLC30A1	250.531	-1.81809	0.673027	-2.70137	0.00690549	0.0430023		ENSG00000143776	CDC42BPA	168.604	-2.71099	0.778568	-3.48202	0.000497652	0.00576081		Ywhah__chr5	1.38141	0.000894153
ENSG00000143476	DTL	17.8398	4.50647	1.79944	2.50438	0.0122668	0.0653006		ENSG00000143761	ARF1	3931.61	2.54136	0.609811	4.16746	3.08012e-05	0.000606098		Tmem86b__chr7	1.38042	0.0191972
ENSG00000117691	NENF	566.803	2.21808	0.666658	3.32716	0.000877353	0.00902786		ENSG00000168159	RNF187	169.233	-2.1926	0.767097	-2.85831	0.00425911	0.0304728		Ndufa8__chr2	1.37976	0.0196042
ENSG00000143494	VASH2	60.0484	3.52773	1.0192	3.46125	0.000537668	0.00621824		ENSG00000168118	RAB4A	549.794	1.58136	0.643219	2.4585	0.0139517	0.0736193		Yipf5__chr18	1.3758	0.0182406
ENSG00000117707	PROX1	468.369	-4.04375	0.670095	-6.0346	1.59359e-09	1.74947e-07		ENSG00000143632	ACTA1	125.687	4.00166	0.911111	4.39207	1.12278e-05	0.000261839		Stat3__chr11	1.37033	0.0335867
ENSG00000143499	SMYD2	355.527	2.06201	0.735562	2.80331	0.00505809	0.0342656		ENSG00000135776	ABCB10	53.9428	-2.65791	1.03977	-2.55624	0.010581	0.0601012		Got1__chr19	1.37006	0.00274388
ENSG00000042781	USH2A	35.1519	-4.12874	1.28203	-3.22046	0.00127985	0.0120958		ENSG00000135775	COG2	151.585	2.01509	0.807763	2.49465	0.0126081	0.0683975		Ppme1__chr7	1.36713	0.0470922
ENSG00000118873	RAB3GAP2	134.059	-1.60974	0.687459	-2.34157	0.0192026	0.0911573		ENSG00000135744	AGT	39651.8	3.07472	0.602441	5.10377	3.32955e-07	1.40225e-05		Cacul1__chr19	1.36513	0.0288658
ENSG00000117791	2002-03-01	276.386	-2.41271	0.703149	-3.43129	0.000600721	0.00677886		ENSG00000116906	GNPAT	675.115	2.06749	0.746289	2.77036	0.00559951	0.0371705		Arfgef2__chr2	1.3569	0.0437498
ENSG00000136630	HLX	30.6521	-4.64566	1.18656	-3.91522	9.03214e-05	0.00147006		ENSG00000270106	TSNAX-DISC1	55.529	2.6939	1.10058	2.4477	0.0143771	0.0752878		Psme3__chr11	1.35473	0.0320455
ENSG00000143507	DUSP10	78.0195	-2.88584	0.845639	-3.41262	0.000643421	0.0071154		ENSG00000116918	TSNAX	470.432	1.79521	0.763218	2.35215	0.0186651	0.0909547		Cd151__chr7	1.35342	0.00116366
ENSG00000197520	FAM177B	26.2927	-3.25973	1.17381	-2.77705	0.00548539	0.0362421		ENSG00000168275	COA6	732.446	2.83216	0.906585	3.12398	0.0017842	0.0158049		Slc25a5__chrX	1.34933	0.0111996
ENSG00000143753	DEGS1	395.794	1.34028	0.584694	2.29228	0.0218895	0.0997135		ENSG00000168264	IRF2BP2	679.994	-2.13296	0.630438	-3.3833	0.000716203	0.0076795		Cycs__chr6	1.34816	0.017302
ENSG00000143742	SRP9	3939.15	3.11418	0.620553	5.01839	5.21055e-07	2.31016e-05		ENSG00000186197	EDARADD	86.177	2.7927	1.11717	2.4998	0.0124262	0.0677556		Fh1__chr1	1.34651	0.0215178
ENSG00000143819	EPHX1	5342.58	3.05903	1.22222	2.50284	0.0123201	0.0654792		ENSG00000077522	ACTN2	18.1729	7.36953	2.3212	3.17488	0.00149901	0.0138369		Cd9__chr6	1.33998	0.0231009
ENSG00000255835	AL117348.2	88.8547	2.54611	0.985808	2.58276	0.0098013	0.0556235		ENSG00000116984	MTR	87.0911	-2.16573	0.892918	-2.42545	0.0152893	0.0786745		Hax1__chr3	1.33749	0.00484956
ENSG00000163041	H3F3A	5419.21	2.75158	0.630807	4.362	1.28877e-05	0.000307838		ENSG00000180875	GREM2	46.63	-6.58873	1.66008	-3.96892	7.21978e-05	0.00122744		Tango2__chr16	1.33179	0.0440625
ENSG00000143776	CDC42BPA	272.355	-3.57994	0.669757	-5.34513	9.03517e-08	5.36145e-06		ENSG00000179456	ZBTB18	52.3717	-2.70705	1.06314	-2.54629	0.0108876	0.0613525		Tceb2__chr17	1.32829	0.0355612
ENSG00000143761	ARF1	2819.38	2.35002	0.669822	3.50842	0.000450775	0.00539921		ENSG00000143653	SCCPDH	1680.93	1.70848	0.662241	2.57984	0.00988454	0.0574611		Got2__chr8	1.32783	0.00319841
ENSG00000162910	MRPL55	500.196	1.89286	0.753749	2.51126	0.0120302	0.0644345		ENSG00000184731	FAM110C	49.0116	-3.31846	1.09757	-3.02346	0.00249899	0.0204615		Atp13a3__chr16	1.32723	0.0255338
ENSG00000143774	GUK1	1119.39	1.74155	0.71883	2.42276	0.015403	0.0774448		ENSG00000143727	ACP1	643.321	1.69762	0.65216	2.60308	0.00923914	0.0547065		Txndc5__chr13	1.32214	0.0104957
ENSG00000168159	RNF187	173.309	-2.37655	0.629401	-3.7759	0.000159431	0.00232854		ENSG00000130508	PXDN	19.9867	-5.08354	1.8648	-2.72605	0.00640974	0.0412648		Ass1__chr2	1.31597	0.0473463
ENSG00000143632	ACTA1	84.4557	3.85806	0.817655	4.71845	2.37651e-06	7.86337e-05		ENSG00000182551	ADI1	6135.96	1.85313	0.617492	3.00106	0.0026904	0.0215205		Lect2__chr13	1.31369	0.0341246
ENSG00000135801	TAF5L	71.5143	-3.03032	0.96812	-3.1301	0.00174744	0.0153425		ENSG00000171863	RPS7	2939.56	1.91552	0.615172	3.1138	0.00184694	0.0162098		Mbl2__chr19	1.31226	0.00340025
ENSG00000135744	AGT	29850.9	2.3178	0.688155	3.36813	0.000756796	0.00805225		ENSG00000134308	YWHAQ	1763.63	2.28716	0.598266	3.82299	0.000131844	0.00199928		Tmpo__chr10	1.31057	0.0123603
ENSG00000116903	EXOC8	148.008	-2.55107	0.817438	-3.12081	0.00180353	0.0157226		ENSG00000172059	KLF11	120.625	-3.12945	0.8369	-3.73934	0.000184503	0.00262372		Nfs1__chr2	1.30913	0.012327
ENSG00000116918	TSNAX	301.412	2.55093	0.793523	3.21469	0.00130585	0.0122646		ENSG00000171848	RRM2	344.272	2.54372	1.04235	2.44036	0.0146725	0.0763587		Ewsr1__chr11	1.30737	0.0263929
ENSG00000168275	COA6	490.614	3.21676	1.08086	2.97611	0.00291929	0.0225294		ENSG00000115758	ODC1	2631.39	4.28926	0.69609	6.16193	7.18632e-10	6.92571e-08		Tpmt__chr13	1.30678	0.0397774
ENSG00000086619	ERO1B	147.556	-2.71237	0.941157	-2.88195	0.00395223	0.0283497		ENSG00000143882	ATP6V1C2	1945.74	2.36815	0.60024	3.94533	7.96894e-05	0.00132799		Suclg1__chr6	1.30374	0.00756622
ENSG00000186197	EDARADD	58.4194	3.05216	1.11444	2.73874	0.00616756	0.0396739		ENSG00000143870	PDIA6	4762.91	3.13463	0.603122	5.19734	2.02164e-07	9.4292e-06		Paics__chr5	1.29868	0.0144187
ENSG00000116984	MTR	125.468	-2.91247	1.00772	-2.89015	0.00385059	0.0277407		ENSG00000134324	LPIN1	236.172	-1.81938	0.710652	-2.56015	0.0104627	0.0596984		Rtn4__chr11	1.29693	0.0127524
ENSG00000244020	MT1HL1	16.2286	-7.47922	2.07062	-3.61207	0.000303757	0.00394313		ENSG00000197872	FAM49A	20.9603	-4.33671	1.82254	-2.37949	0.0173367	0.0861611		Prdx1__chr4	1.29676	0.0338481
ENSG00000133019	CHRM3	21.9946	3.35163	1.21031	2.76924	0.00561865	0.0369165		ENSG00000163029	SMC6	121.895	-1.96195	0.843231	-2.32671	0.0199806	0.0954749		Hibadh__chr6	1.29417	0.0138925
ENSG00000180875	GREM2	54.5023	-6.40916	1.46971	-4.36084	1.29565e-05	0.000308592		ENSG00000240857	RDH14	192.494	2.48378	0.740031	3.35631	0.000789888	0.00831358		Arpc5__chr1	1.29305	0.0435982
ENSG00000174371	EXO1	8.79022	4.44476	1.90523	2.33293	0.0196518	0.0926267		ENSG00000143867	OSR1	24.2124	8.06093	2.13702	3.77205	0.000161912	0.00236123		Mpp1__chrX	1.28967	0.0407278
ENSG00000143702	CEP170	119.567	-3.02105	0.812094	-3.72008	0.000199162	0.00280027		ENSG00000132031	MATN3	24.2909	4.40489	1.76162	2.50048	0.0124027	0.0676886		Psmd14__chr2	1.28823	0.0220595
ENSG00000179456	ZBTB18	51.8391	-2.68857	1.00933	-2.66372	0.0077281	0.0467038		ENSG00000068697	LAPTM4A	2044.01	2.18017	0.597618	3.6481	0.000264186	0.00351618		Cct4__chr11	1.2855	0.00163875
ENSG00000277462	ZNF670	9.00171	6.88001	2.18349	3.15093	0.00162752	0.0145285		ENSG00000143878	RHOB	962.232	-3.49719	0.682257	-5.12592	2.96089e-07	1.26993e-05		Atg12__chr18	1.28469	0.0129171
ENSG00000259823	LYPD8	6.52228	5.50123	2.39744	2.29462	0.0217547	0.0993463		ENSG00000143869	GDF7	46.2783	-4.39362	1.55351	-2.82819	0.00468124	0.0325894		Lasp1__chr11	1.28233	0.0311259
ENSG00000184731	FAM110C	33.5285	-2.82056	0.912177	-3.09212	0.00198732	0.0168856		ENSG00000084674	APOB	25446.8	-1.52273	0.651006	-2.33905	0.0193329	0.0932997		Cmas__chr6	1.28043	0.017846
ENSG00000130508	PXDN	67.496	-7.18044	1.35408	-5.30283	1.14019e-07	6.5628e-06		ENSG00000218819	TDRD15	16.7498	-5.33673	2.09889	-2.54265	0.0110015	0.0617768		Mbnl2__chr14	1.27569	0.0452163
ENSG00000171853	TRAPPC12	108.559	-1.63162	0.688609	-2.36944	0.017815	0.086369		ENSG00000119782	FKBP1B	112.827	-3.26516	0.993911	-3.28517	0.00101921	0.0102228		Bpnt1__chr1	1.27513	0.0408847
ENSG00000118004	COLEC11	228.028	-3.7652	0.96802	-3.88959	0.000100413	0.00160207		ENSG00000115128	SF3B6	765.221	2.10727	0.695263	3.03089	0.0024383	0.0201591		Acp1__chr12	1.2577	0.0112816
ENSG00000134313	KIDINS220	122.404	-2.78122	0.844934	-3.29164	0.000996061	0.00997686		ENSG00000198399	ITSN2	93.9848	-2.39544	0.886216	-2.703	0.0068716	0.0435889		Gch1__chr14	1.25428	0.00497482
ENSG00000134308	YWHAQ	1390.58	1.7076	0.682169	2.50319	0.0123078	0.0654559		ENSG00000084676	NCOA1	72.1684	-3.56115	0.98584	-3.6123	0.000303496	0.00393463		Aldh9a1__chr1	1.24198	0.0286189
ENSG00000172059	KLF11	103.931	-3.00313	0.889871	-3.37479	0.000738717	0.00790046		ENSG00000119772	DNMT3A	151.347	-2.08947	0.886084	-2.3581	0.0183687	0.089949		Calm3__chr7	1.23923	0.0366852
ENSG00000171848	RRM2	199.062	3.6112	0.768689	4.69787	2.62891e-06	8.49501e-05		ENSG00000143970	ASXL2	68.9026	-2.93155	0.973462	-3.01147	0.00259989	0.0210388		Ywhae__chr11	1.23827	0.0145439
ENSG00000115758	ODC1	1685.37	5.42095	1.35006	4.01535	5.93567e-05	0.00106604		ENSG00000084693	AGBL5	1454.41	1.56556	0.648203	2.41523	0.0157251	0.0801434		Bola3__chr6	1.23517	0.0134205
ENSG00000143882	ATP6V1C2	1486.47	1.91699	0.796282	2.40743	0.0160653	0.0795208		ENSG00000228474	OST4	2913.3	1.71924	0.660471	2.60305	0.00923972	0.0547065		Ostc__chr3	1.22644	0.0106709
ENSG00000143870	PDIA6	3460.37	2.62112	0.832047	3.15021	0.00163152	0.014555		ENSG00000138030	KHK	3007.27	-2.25849	0.608594	-3.711	0.000206446	0.00289712		Cope__chr8	1.22345	0.048457
ENSG00000134324	LPIN1	251.017	-2.10017	0.649503	-3.2335	0.00122282	0.0117104		ENSG00000138028	CGREF1	1490.42	-2.2041	0.609169	-3.6182	0.000296662	0.00386399		Cox8a__chr19	1.21692	0.0315003
ENSG00000163032	VSNL1	72.8513	2.11066	0.742718	2.84181	0.00448579	0.0313099		ENSG00000138074	SLC5A6	503.364	1.76837	0.745399	2.37238	0.0176741	0.0875389		Anxa4__chr6	1.20549	0.0267728
ENSG00000163029	SMC6	100.653	-1.83465	0.683354	-2.68477	0.00725797	0.0446937		ENSG00000138085	ATRAID	1245.03	2.32234	0.638919	3.6348	0.000278192	0.00367507		Hdac2__chr10	1.19423	0.0436947
ENSG00000143867	OSR1	16.3603	5.58213	1.73561	3.21624	0.00129883	0.0122264		ENSG00000115204	MPV17	836.642	1.99856	0.688101	2.90446	0.00367891	0.0272857		Golim4__chr3	1.19204	0.0226258
ENSG00000132031	MATN3	14.8126	7.59748	2.09312	3.62974	0.000283706	0.00372957		ENSG00000163795	ZNF513	96.7983	-2.84499	1.03081	-2.75996	0.00578084	0.0380271		Pcbp1__chr6	1.1862	0.0390275
ENSG00000055917	PUM2	191.151	-1.87142	0.677135	-2.76373	0.00571444	0.0374272		ENSG00000115241	PPM1G	591.539	2.09097	0.644433	3.24467	0.00117587	0.0114286		Acsl5__chr19	1.17857	0.0164552
ENSG00000115128	SF3B6	601.228	1.6448	0.645526	2.548	0.0108344	0.0596485		ENSG00000115216	NRBP1	872.819	2.15092	0.634214	3.39148	0.000695166	0.00748907		Cib1__chr7	1.17764	0.043414
ENSG00000198399	ITSN2	176.44	-3.51601	0.715641	-4.91309	8.96536e-07	3.63181e-05		ENSG00000084734	GCKR	203.631	-3.85485	1.01801	-3.78667	0.000152681	0.00226817		Chmp5__chr4	1.17742	0.020599
ENSG00000084676	NCOA1	59.4237	-3.40668	0.845344	-4.02994	5.57914e-05	0.00101394		ENSG00000243147	MRPL33	294.499	1.88532	0.72959	2.58409	0.00976372	0.0569449		Cd302__chr2	1.17214	0.0182857
ENSG00000143970	ASXL2	79.3354	-3.25533	0.872815	-3.72969	0.000191719	0.00271402		ENSG00000158125	XDH	214.238	-5.71379	0.84555	-6.75748	1.40408e-11	2.02365e-09		Apoc2__chr7	1.17156	0.00639394
ENSG00000138018	SELENOI	150.031	-2.19598	0.639602	-3.43335	0.000596164	0.00674427		ENSG00000277893	SRD5A2	143.979	-3.08607	1.10972	-2.78096	0.00541987	0.0363552		Hadhb__chr5	1.15891	0.0037052
ENSG00000138080	EMILIN1	46.8757	-4.15973	1.56896	-2.65127	0.00801906	0.0479206		ENSG00000115760	BIRC6	280.23	-3.82087	0.785973	-4.86132	1.16607e-06	4.02041e-05		Tomm70a__chr16	1.15699	0.0451675
ENSG00000138085	ATRAID	865.582	2.48476	0.806648	3.08035	0.00206759	0.0173454		ENSG00000049323	LTBP1	328.451	-3.76653	0.870988	-4.32443	1.52924e-05	0.000336709		Pipox__chr11	1.15596	0.0099054
ENSG00000115204	MPV17	576.401	2.21623	0.759151	2.91936	0.00350752	0.0259688		ENSG00000218739	CEBPZOS	404.585	1.85316	0.664583	2.78846	0.00529589	0.0357032		Caprin1__chr2	1.15569	0.010831
ENSG00000115241	PPM1G	415.234	2.14352	0.843769	2.54041	0.0110722	0.0605354		ENSG00000115828	QPCT	391.696	6.15434	1.03152	5.96627	2.42744e-09	2.10121e-07		Cct6a__chr5	1.15355	0.0366137
ENSG00000115216	NRBP1	595.281	2.35918	0.884605	2.66693	0.00765473	0.0464127		ENSG00000115875	SRSF7	611.899	1.6324	0.632261	2.58185	0.00982732	0.0572243		Sec13__chr6	1.14399	0.0414097
ENSG00000157992	KRTCAP3	26.8825	-3.7655	1.06901	-3.5224	0.000427653	0.00518975		ENSG00000115904	SOS1	114.014	-2.68902	0.846604	-3.17624	0.00149195	0.0137887		Immt__chr6	1.14092	0.0453339
ENSG00000115226	FNDC4	446.445	-2.29319	0.800154	-2.86593	0.00415784	0.0294927		ENSG00000143924	EML4	466.501	-1.99567	0.648475	-3.07748	0.00208757	0.0178689		Atp5g3__chr2	1.13129	0.0246586
ENSG00000084734	GCKR	127.153	-3.38822	0.892409	-3.79672	0.000146626	0.00216632		ENSG00000162881	OXER1	52.8014	-2.96542	1.15067	-2.57713	0.00996233	0.0578282		Errfi1__chr4	1.12293	0.0316185
ENSG00000213626	LBH	23.5824	-2.8981	1.18384	-2.44806	0.0143628	0.0733945		ENSG00000162882	HAAO	782.294	-3.35587	0.638011	-5.2599	1.44138e-07	6.96651e-06		Dbi__chr1	1.11999	0.0330979
ENSG00000013016	EHD3	243.091	-2.87122	0.898538	-3.19543	0.00139621	0.0129229		ENSG00000138075	ABCG5	230.438	-4.59395	0.936644	-4.90469	9.35761e-07	3.37169e-05		Nnt__chr13	1.10814	0.0494497
ENSG00000158125	XDH	108.657	-4.77852	0.942155	-5.07191	3.93849e-07	1.83044e-05		ENSG00000143921	ABCG8	144.786	-4.06358	0.930965	-4.36492	1.2717e-05	0.000292728		Tmx1__chr12	1.10201	0.0276476
ENSG00000115760	BIRC6	217.055	-3.24528	0.810388	-4.0046	6.21216e-05	0.00110038		ENSG00000171132	PRKCE	107.921	-3.53272	0.880723	-4.01116	6.04207e-05	0.00106455		Adk__chr14	1.09254	0.0268128
ENSG00000150938	CRIM1	66.9047	-2.76872	0.778462	-3.55666	0.000375602	0.00472768		ENSG00000250565	ATP6V1E2	17.5219	4.9322	1.99836	2.46812	0.0135824	0.0723823		Serping1__chr2	1.077	0.0365882
ENSG00000115828	QPCT	249.779	7.80287	1.30164	5.99464	2.03938e-09	2.19525e-07		ENSG00000151665	PIGF	85.5025	2.19153	0.892346	2.45592	0.0140526	0.0740005		Copb1__chr7	1.05935	0.032783
ENSG00000115841	RMDN2	53.0209	-2.73256	0.954179	-2.86378	0.00418615	0.0296049		ENSG00000273269	STPG4	253.087	3.89066	0.758645	5.12843	2.92163e-07	1.26667e-05		Ccbl2__chr3	1.0572	0.0420796
ENSG00000138061	CYP1B1	53.0795	-4.03285	1.21124	-3.32953	0.000869934	0.00896822		ENSG00000143933	CALM2	7198.66	3.06744	0.596393	5.14331	2.69933e-07	1.19293e-05		Idh1__chr1	1.05719	0.0444539
ENSG00000115904	SOS1	81.6729	-2.15154	0.905219	-2.37682	0.0174627	0.0851161		ENSG00000115239	ASB3	122.612	-2.01697	0.82616	-2.44139	0.014631	0.0761937		Sdc1__chr12	1.04864	0.031959
ENSG00000152154	TMEM178A	21.4722	5.24195	1.86123	2.81639	0.0048566	0.0331718		ENSG00000119737	GPR75	26.2152	-5.1642	1.58547	-3.2572	0.00112519	0.0110299		Hspa4__chr11	1.04788	0.0380598
ENSG00000143924	EML4	406.972	-1.92389	0.618307	-3.11155	0.0018611	0.0160434		ENSG00000068878	PSME4	235.958	-2.65177	0.726705	-3.64903	0.000263234	0.00350643		Ppp1cb__chr5	1.04258	0.0097298
ENSG00000138075	ABCG5	165.563	-3.34034	1.01103	-3.3039	0.000953492	0.00965549		ENSG00000115306	SPTBN1	1099.28	-2.99739	0.617019	-4.85785	1.18666e-06	4.07385e-05		Arf6__chr12	1.04136	0.0485157
ENSG00000143921	ABCG8	100.517	-3.26166	0.887317	-3.67586	0.000237046	0.00321671		ENSG00000143947	RPS27A	5856.81	2.35044	0.589656	3.98613	6.71606e-05	0.00116407		Acadm__chr3	1.03498	0.00400345
ENSG00000273269	STPG4	187.851	2.84651	0.896665	3.17455	0.0015007	0.0136089		ENSG00000138035	PNPT1	277.206	2.12055	0.692788	3.06089	0.00220681	0.0185979		Hsp90aa1__chr12	1.0323	0.0477699
ENSG00000143933	CALM2	5365.21	2.47826	0.967303	2.56203	0.0104063	0.0579655		ENSG00000162924	REL	366.386	-2.82533	0.675021	-4.18554	2.8449e-05	0.000568199		Pfdn2__chr1	1.02578	0.0165563
ENSG00000095002	MSH2	47.298	3.10744	0.834486	3.72378	0.000196261	0.00276887		ENSG00000115464	USP34	219.612	-2.06618	0.80753	-2.55864	0.0105081	0.0598458		Fbp1__chr13	1.02344	0.0281994
ENSG00000170802	FOXN2	104.028	-3.74075	0.725326	-5.15734	2.50482e-07	1.25826e-05		ENSG00000115484	CCT4	1011.46	2.43165	0.612612	3.96932	7.20784e-05	0.00122671		Cnih__chr14	1.02258	0.0014195
ENSG00000162869	PPP1R21	48.0157	-2.39717	1.0132	-2.36594	0.0179846	0.0868931		ENSG00000115507	OTX1	17.5192	4.75345	2.00397	2.37201	0.0176915	0.0875437		Tmem248__chr5	1.02054	0.0149405
ENSG00000119737	GPR75	17.3358	-4.65887	1.5578	-2.99067	0.00278366	0.0217869		ENSG00000143951	WDPCP	154.314	-2.40163	0.811393	-2.95988	0.00307759	0.0238543		Uqcrfs1__chr13	1.02025	0.0204599
ENSG00000068878	PSME4	196.234	-2.45492	0.653395	-3.75717	0.000171843	0.00247435		ENSG00000014641	MDH1	1551.06	2.55423	0.678767	3.76304	0.000167859	0.00243685		Nbr1__chr11	1.00358	0.00832898
ENSG00000170634	ACYP2	81.0154	-2.15919	0.740865	-2.91441	0.00356357	0.0262782		ENSG00000138069	RAB1A	927.019	1.53459	0.657472	2.33407	0.019592	0.0941803		Higd2a__chr13	1.00268	0.0481369
ENSG00000115306	SPTBN1	790.89	-2.53067	0.692996	-3.65178	0.00026043	0.00346759		ENSG00000243667	WDR92	96.8176	2.13048	0.875324	2.43394	0.0149355	0.0772761		Pcyox1__chr6	0.984953	0.0334468
ENSG00000143947	RPS27A	4393.18	1.96319	0.758316	2.58888	0.00962896	0.0548754		ENSG00000273398	AC017083.4	108.891	2.22803	0.840994	2.64928	0.00806624	0.0493974		Hsbp1__chr8	0.982473	0.0291719
ENSG00000275052	PPP4R3B	216.361	-2.27334	0.677473	-3.35561	0.000791891	0.00834002		ENSG00000115946	PNO1	163.637	2.9265	0.770414	3.79861	0.000145512	0.00217968		Serpind1__chr16	0.95412	0.0417615
ENSG00000162924	REL	300.828	-2.57958	0.918524	-2.80839	0.00497895	0.033854		ENSG00000115956	PLEK	21.4503	-5.78117	1.92755	-2.99923	0.00270667	0.0216182		Cox5a__chr9	0.92887	0.042046
ENSG00000115484	CCT4	814.329	1.68083	0.622258	2.70118	0.00690935	0.0430023		ENSG00000169564	PCBP1	2410.62	1.5013	0.593326	2.53032	0.0113959	0.0634791		Dram2__chr3	0.92668	0.029664
ENSG00000115504	EHBP1	213.715	-2.96798	0.692284	-4.28723	1.80917e-05	0.000410268		ENSG00000124374	PAIP2B	61.4144	-3.29092	1.1562	-2.84632	0.00442284	0.0313776		Pdia5__chr16	0.907892	0.0137704
ENSG00000115507	OTX1	10.5059	7.10473	2.0724	3.42826	0.000607462	0.00682243		ENSG00000075292	ZNF638	237.734	-2.63051	0.713945	-3.68447	0.000229177	0.00314981		Grpel1__chr5	0.902271	0.0474121
ENSG00000143951	WDPCP	185.34	-2.75556	0.891002	-3.09265	0.00198375	0.0168725		ENSG00000135636	DYSF	37.888	-5.24716	1.51772	-3.45726	0.000545703	0.0061916		Ppm1a__chr12	0.899928	0.0274582
ENSG00000014641	MDH1	1154.79	2.13932	0.77234	2.76993	0.0056069	0.0368539		ENSG00000003137	CYP26B1	33.6383	5.14258	2.21797	2.3186	0.0204167	0.0969534		Ube2k__chr5	0.899368	0.047659
ENSG00000169764	UGP2	1596.5	-2.25788	0.693997	-3.25344	0.00114018	0.011066		ENSG00000144040	SFXN5	252.807	-1.93092	0.714627	-2.70199	0.00689252	0.0436181		Impa1__chr3	0.896708	0.0412973
ENSG00000119844	AFTPH	130.077	-2.18623	0.700829	-3.11949	0.00181165	0.0157502		ENSG00000135624	CCT7	1606.62	2.1772	0.616167	3.53346	0.000410161	0.00498614		Atp5j__chr16	0.869373	0.0335465
ENSG00000143995	MEIS1	35.2896	-3.40944	1.3401	-2.54416	0.0109539	0.0600276		ENSG00000144034	TPRKB	166.146	2.1755	0.819936	2.65326	0.00797195	0.0489988		Sod2__chr17	0.850263	0.0401414
ENSG00000115946	PNO1	123.76	2.22697	0.939004	2.37163	0.0177099	0.0860423		ENSG00000115307	AUP1	1612.15	1.58232	0.604961	2.61558	0.00890762	0.0532726		Ubqln1__chr13	0.843117	0.0233233
ENSG00000119865	CNRIP1	67.143	-6.73866	1.43987	-4.68005	2.86808e-06	9.09066e-05		ENSG00000135622	SEMA4F	83.2325	3.18967	0.935068	3.41116	0.000646862	0.00709287		Chp1__chr2	0.841855	0.0266743
ENSG00000115956	PLEK	18.9251	-5.66343	1.79435	-3.15626	0.00159809	0.0143275		ENSG00000172016	REG3A	90726.8	7.52475	1.59465	4.71875	2.37299e-06	7.25354e-05		Ssr1__chr13	0.831661	0.0486432
ENSG00000169564	PCBP1	1756.93	1.52644	0.656816	2.324	0.0201255	0.0939512		ENSG00000115423	DNAH6	15.0823	-5.86126	2.21156	-2.65029	0.00804233	0.0492955		Ctsl__chr13	0.820203	0.0386796
ENSG00000163235	TGFA	14.8237	-4.80717	2.06461	-2.32837	0.0198924	0.0933889		ENSG00000186854	TRABD2A	384.259	1.91944	0.68536	2.80063	0.00510024	0.0347776		Hnf4a__chr2	0.762976	0.0449813
ENSG00000124357	NAGK	284.354	-1.76507	0.693539	-2.54502	0.0109272	0.0599603		ENSG00000034510	TMSB10	15138	2.82445	0.628719	4.49238	7.0431e-06	0.000178002		Pex5__chr6	0.76047	0.0431086
ENSG00000124370	MCEE	64.1505	-2.72763	0.892128	-3.05744	0.00223235	0.0184108		ENSG00000042445	RETSAT	353.287	-2.00547	0.683903	-2.93239	0.00336359	0.0255633		F13b__chr1	0.759612	0.0430036
ENSG00000124374	PAIP2B	93.5305	-4.3251	1.01329	-4.26837	1.96909e-05	0.000438428		ENSG00000168906	MAT2A	1830.04	2.46798	0.677634	3.64206	0.000270468	0.00358488		Abcb4__chr5	0.742773	0.0427958
ENSG00000075292	ZNF638	235.947	-2.73962	0.69244	-3.95647	7.60652e-05	0.00127367		ENSG00000153561	RMND5A	531.88	-1.51634	0.639468	-2.37125	0.0177279	0.0876427		Uqcrc2__chr7	0.687259	0.0446793
ENSG00000135636	DYSF	69.5064	-5.66908	1.16168	-4.88007	1.06047e-06	4.18558e-05		ENSG00000153563	CD8A	34.5648	-4.16862	1.33221	-3.12909	0.00175349	0.0156193		Mbl1__chr14	-0.736757	0.0348102
ENSG00000144040	SFXN5	186.098	-1.59439	0.642559	-2.48132	0.0130898	0.0684726		ENSG00000187627	RGPD1	286.221	-3.25934	0.996004	-3.27241	0.00106633	0.0106156		Ndufa5__chr6	-0.762978	0.0316772
ENSG00000135624	CCT7	1130.7	2.28425	0.70176	3.25503	0.0011338	0.0110194		ENSG00000183281	PLGLB1	703.147	-2.9925	0.937362	-3.19247	0.00141063	0.0131741		Prkd3__chr17	-0.769217	0.0357616
ENSG00000274049	INO80B-WBP1	260.017	1.91171	0.703536	2.71728	0.00658204	0.0415027		ENSG00000125551	PLGLB2	473.35	-2.49132	0.994634	-2.50476	0.0122533	0.06711		Tm2d3__chr7	-0.847692	0.0417314
ENSG00000239779	WBP1	255.094	2.18191	0.71748	3.04108	0.00235731	0.0191836		ENSG00000185304	RGPD2	320.183	-3.10908	1.01525	-3.06238	0.00219581	0.0185571		Ndufs6__chr13	-0.861533	0.0482888
ENSG00000144045	DQX1	9.43552	6.96793	2.34445	2.9721	0.00295775	0.0227282		ENSG00000174501	ANKRD36C	75.4167	-5.89912	1.22432	-4.8183	1.44789e-06	4.82568e-05		Serpinc1__chr1	-0.866074	0.0433719
ENSG00000115307	AUP1	1100.45	1.92685	0.837601	2.30043	0.0214236	0.0982132		ENSG00000168763	CNNM3	285.781	-2.99366	0.698118	-4.28818	1.8014e-05	0.00038787		Atf4__chr15	-0.878593	0.0373388
ENSG00000135622	SEMA4F	55.147	3.35052	1.13159	2.96088	0.0030676	0.0233371		ENSG00000135976	ANKRD36	102.327	-3.23425	0.879624	-3.67685	0.000236132	0.003226		Ugp2__chr11	-0.893597	0.0176336
ENSG00000115350	POLE4	313.442	1.75717	0.700118	2.50982	0.0120792	0.0646552		ENSG00000196912	ANKRD36B	65.1334	-2.59702	1.0015	-2.59312	0.00951093	0.0558632		Bri3bp__chr5	-0.904733	0.042219
ENSG00000176204	LRRTM4	13.9059	3.18842	1.36115	2.34245	0.0191578	0.0909705		ENSG00000115085	ZAP70	14.3088	-5.78335	2.27236	-2.54509	0.0109251	0.0614588		2700089E24Rik__chr6	-0.910421	0.0499375
ENSG00000143954	REG3G	256.903	25.0401	4.32817	5.78538	7.23488e-09	6.39073e-07		ENSG00000115514	TXNDC9	166.302	1.74997	0.755784	2.31543	0.0205893	0.0973656		Agpat2__chr2	-0.916982	0.0491063
ENSG00000172016	REG3A	57753.8	16.3774	3.22411	5.07965	3.78123e-07	1.78668e-05		ENSG00000071082	RPL31	6520.37	1.78233	0.590664	3.0175	0.0025487	0.0207713		Tmco1__chr1	-0.92342	0.0172939
ENSG00000115423	DNAH6	7.95933	-5.15891	2.09407	-2.46359	0.0137554	0.0710355		ENSG00000153165	RGPD3	106.207	-3.74497	1.08475	-3.45239	0.000555641	0.00628236		Sec63__chr10	-0.929216	0.0159853
ENSG00000186854	TRABD2A	239.7	3.258	0.970637	3.35656	0.000789186	0.00833188		ENSG00000135968	GCC2	263.888	-2.08884	0.739098	-2.82621	0.00471029	0.0327204		Oaz1__chr10	-0.936738	0.0375685
ENSG00000034510	TMSB10	9911.15	3.87994	1.02825	3.77332	0.000161088	0.00234654		ENSG00000153201	RANBP2	168.6	-1.93956	0.795342	-2.43865	0.0147424	0.0766239		Hsd3b7__chr7	-0.946646	0.0281598
ENSG00000042445	RETSAT	320.815	-2.01001	0.767434	-2.61913	0.00881537	0.0513105		ENSG00000015568	RGPD5	161.12	-2.60162	0.823377	-3.15969	0.00157938	0.0144263		Eva1a__chr6	-0.950685	0.0398641
ENSG00000168906	MAT2A	1378.28	1.93281	0.714526	2.70503	0.00682981	0.0427076		ENSG00000183054	RGPD6	126.624	-2.6501	0.847079	-3.12852	0.0017569	0.0156323		Mapre1__chr2	-0.962785	0.0444979
ENSG00000187627	RGPD1	352.02	-3.51803	0.835628	-4.21005	2.55319e-05	0.00054123		ENSG00000169679	BUB1	29.5704	4.17688	1.38018	3.02634	0.00247532	0.0203704		Cd59a__chr2	-0.968074	0.00719765
ENSG00000183281	PLGLB1	659.551	-2.74326	0.83337	-3.29177	0.000995599	0.00997686		ENSG00000153094	BCL2L11	75.8357	-2.95119	0.957637	-3.08175	0.00205791	0.0176923		Ctsd__chr7	-0.996553	0.038649
ENSG00000125551	PLGLB2	556.68	-2.61447	0.867677	-3.01319	0.00258519	0.0206084		ENSG00000169629	RGPD8	54.4794	-2.74234	1.05365	-2.6027	0.00924924	0.0547224		Afm__chr5	-0.998949	0.0497224
ENSG00000185304	RGPD2	375.376	-3.22013	0.867774	-3.71079	0.000206611	0.00288056		ENSG00000136689	IL1RN	562.93	-6.54361	0.758762	-8.62406	6.46226e-18	2.87176e-15		Eif5b__chr1	-1.0021	0.0241627
ENSG00000172086	KRCC1	132.269	-2.38536	0.686777	-3.47326	0.000514177	0.00598982		ENSG00000125637	PSD4	276.914	-1.63095	0.690901	-2.36061	0.0182448	0.0895889		Sppl2a__chr2	-1.00284	0.00409662
ENSG00000174501	ANKRD36C	37.8974	-4.52191	1.2031	-3.75855	0.000170903	0.00247213		ENSG00000136682	CBWD2	256.122	2.50628	0.730258	3.43205	0.000599045	0.00666142		Haao__chr17	-1.021	0.0402105
ENSG00000274286	ADRA2B	10.3346	-6.82899	2.08448	-3.27611	0.00105246	0.0104222		ENSG00000019169	MARCO	49.9695	-6.18255	2.11377	-2.92489	0.00344579	0.0259904		Cbx3__chr6	-1.03037	0.0494164
ENSG00000121152	NCAPH	17.5411	6.83358	1.70186	4.01536	5.93555e-05	0.00106604		ENSG00000155368	DBI	6478.45	1.61743	0.649819	2.48905	0.0128087	0.0692507		Yipf1__chr4	-1.03323	0.0237032
ENSG00000168763	CNNM3	219.995	-2.65242	0.668392	-3.96836	7.23694e-05	0.00122665		ENSG00000144120	TMEM177	236.65	1.88574	0.723639	2.60591	0.0091631	0.0543333		Ppara__chr15	-1.0367	0.0492178
ENSG00000158417	EIF5B	348.825	-1.60972	0.643408	-2.50187	0.0123539	0.0655958		ENSG00000226479	TMEM185B	68.9612	3.25379	0.972177	3.34691	0.000817164	0.00855003		Srd5a1__chr13	-1.03674	0.0470257
ENSG00000135945	REV1	60.903	-1.84309	0.804374	-2.29134	0.0219436	0.0998243		ENSG00000144118	RALB	77.5451	3.07066	1.08724	2.82426	0.00473894	0.0328909		Ppm1b__chr17	-1.04675	0.0340504
ENSG00000071054	MAP4K4	159.237	-1.74316	0.629706	-2.76822	0.00563637	0.0370161		ENSG00000163083	INHBB	47.8894	-3.34069	1.41644	-2.35851	0.0183487	0.0898927		Ypel5__chr17	-1.04749	0.0386433
ENSG00000115594	IL1R1	276.6	-2.55402	0.614864	-4.1538	3.26997e-05	0.000659781		ENSG00000155438	NIFK	213.41	2.56366	0.755592	3.39291	0.000691534	0.00745999		Hsd17b11__chr5	-1.06268	0.0459158
ENSG00000115598	IL1RL2	28.9511	-3.09041	1.29168	-2.39256	0.0167313	0.0822037		ENSG00000136732	GYPC	43.3666	-5.28801	1.63854	-3.22728	0.00124975	0.0120081		Hspa5__chr2	-1.0667	0.0122763
ENSG00000115604	IL18R1	47.5727	-4.88031	1.1602	-4.20643	2.5944e-05	0.000547168		ENSG00000169967	MAP3K2	180.666	-3.27228	0.778507	-4.20328	2.6308e-05	0.000532754		Agpat6__chr8	-1.0671	0.0103122
ENSG00000115652	UXS1	128.609	2.23196	0.883206	2.52711	0.0115004	0.0622404		ENSG00000115718	PROC	1854.7	-1.83801	0.616695	-2.98042	0.00287854	0.0226852		Ndufa3__chr7	-1.07109	0.0313181
ENSG00000153165	RGPD3	113.045	-3.46049	0.934624	-3.70255	0.000213442	0.00295838		ENSG00000072163	LIMS2	233.48	-7.60999	1.18757	-6.40801	1.47432e-10	1.61549e-08		Plin3__chr17	-1.10176	0.0277248
ENSG00000198203	SULT1C2	86.4757	3.43357	1.1019	3.11603	0.00183305	0.0158676		ENSG00000136720	HS6ST1	229.705	-2.17861	0.835746	-2.60678	0.00913976	0.0542433		Pbld2__chr10	-1.10355	0.0301204
ENSG00000135968	GCC2	273.48	-2.1914	0.741862	-2.95392	0.00313763	0.0237717		ENSG00000196604	POTEF	215.04	4.23138	0.794363	5.32675	9.99835e-08	5.01422e-06		Pigq__chr17	-1.10516	0.0311108
ENSG00000153201	RANBP2	170.658	-2.01124	0.805961	-2.49546	0.0125794	0.0665798		ENSG00000152086	TUBA3E	21.6147	6.96469	2.21944	3.13803	0.00170085	0.0152609		Creg1__chr1	-1.10717	0.00932643
ENSG00000183054	RGPD6	88.4254	-2.02443	0.807098	-2.50828	0.0121321	0.0648456		ENSG00000072135	PTPN18	166.797	-2.30398	0.781813	-2.94698	0.00320899	0.0246577		Cpsf7__chr19	-1.10825	0.040339
ENSG00000188177	ZC3H6	65.25	-1.81375	0.746334	-2.43021	0.01509	0.0762176		ENSG00000196834	POTEI	216.463	2.7985	0.726147	3.8539	0.00011625	0.00181088		Pih1d1__chr7	-1.12509	0.0325555
ENSG00000136689	IL1RN	77.942	-3.36974	0.99654	-3.38143	0.000721085	0.0077519		ENSG00000222038	POTEJ	221.204	3.40037	0.763629	4.4529	8.47164e-06	0.000207231		Rbm39__chr2	-1.12707	0.00462833
ENSG00000019169	MARCO	104.986	-10.1752	1.82664	-5.57043	2.54114e-08	1.81571e-06		ENSG00000188219	POTEE	241.494	3.49549	0.740123	4.72285	2.3256e-06	7.16858e-05		Zfand5__chr19	-1.13069	0.00592711
ENSG00000155368	DBI	4501.19	2.12189	0.898827	2.36074	0.0182387	0.087775		ENSG00000075886	TUBA3D	34.7724	5.25776	1.77487	2.96234	0.00305311	0.0237451		Ndufb10__chr17	-1.13083	0.0195635
ENSG00000115109	EPB41L5	168.058	-1.63476	0.673541	-2.42711	0.0152198	0.0767097		ENSG00000176771	NCKAP5	42.9148	-4.85965	1.30715	-3.71773	0.000201021	0.00283092		Fam32a__chr8	-1.13394	0.0496439
ENSG00000074054	CLASP1	50.5704	-2.11091	0.902733	-2.33836	0.0193688	0.09171		ENSG00000153086	ACMSD	147.612	-6.80411	1.06411	-6.39417	1.6142e-10	1.74486e-08		Hp1bp3__chr4	-1.13453	0.027825
ENSG00000136732	GYPC	104.049	-5.15391	1.47607	-3.49165	0.00048004	0.00567381		ENSG00000082258	CCNT2	115.975	-2.06453	0.823659	-2.50654	0.012192	0.06682		Kat2b__chr17	-1.14517	0.0190712
ENSG00000169967	MAP3K2	225.294	-3.60175	0.722589	-4.98451	6.2118e-07	2.70636e-05		ENSG00000144224	UBXN4	426.782	-1.69423	0.65424	-2.58962	0.00960824	0.0562844		Eif4a2__chr16	-1.14999	0.0007992
ENSG00000169994	MYO7B	26.4348	8.43574	1.9506	4.32469	1.52745e-05	0.000355626		ENSG00000121966	CXCR4	83.8999	-4.60795	1.41951	-3.24614	0.00116979	0.0113904		Dnajb6__chr5	-1.1549	0.00271213
ENSG00000072163	LIMS2	186.375	-6.32691	1.22021	-5.1851	2.15901e-07	1.11843e-05		ENSG00000075884	ARHGAP15	31.3579	-5.84892	1.68106	-3.47931	0.000502701	0.00580665		Rbbp6__chr7	-1.15957	0.0145368
ENSG00000136709	WDR33	185.569	-1.83068	0.657907	-2.78258	0.00539281	0.0358659		ENSG00000169554	ZEB2	57.3785	-5.7975	1.27674	-4.54084	5.60293e-06	0.000145513		Ranbp10__chr8	-1.1667	0.0481083
ENSG00000196604	POTEF	145.042	4.02243	0.829522	4.84909	1.24026e-06	4.77027e-05		ENSG00000187123	LYPD6	40.4902	6.85682	1.9526	3.51164	0.000445346	0.00528535		Uggt1__chr1	-1.16723	0.0417561
ENSG00000072135	PTPN18	104.115	-1.73228	0.725698	-2.38705	0.0169841	0.0832483		ENSG00000168288	MMADHC	610.752	2.07637	0.704045	2.94921	0.0031859	0.0245275		Eprs__chr1	-1.17176	0.00643516
ENSG00000196834	POTEI	140.49	3.43119	0.751707	4.56453	5.00604e-06	0.000142098		ENSG00000115963	RND3	138.346	-3.49052	1.02026	-3.4212	0.000623447	0.0068833		Krcc1__chr6	-1.17917	0.0226845
ENSG00000222038	POTEJ	142.142	4.19591	0.740983	5.66262	1.49076e-08	1.14409e-06		ENSG00000080345	RIF1	167.692	-2.05112	0.757305	-2.70844	0.00675993	0.0430687		Grb7__chr11	-1.17934	0.0146033
ENSG00000188219	POTEE	158.107	4.00049	0.796036	5.02552	5.02076e-07	2.25553e-05		ENSG00000115233	PSMD14	470.309	2.08923	0.670966	3.11377	0.00184713	0.0162098		Jtb__chr3	-1.18035	0.00335183
ENSG00000153086	ACMSD	115.663	-6.38352	0.967383	-6.59874	4.14654e-11	7.3068e-09		ENSG00000115267	IFIH1	59.2176	-2.69891	1.06595	-2.53194	0.0113435	0.0632307		Ebpl__chr14	-1.18314	0.00509516
ENSG00000082258	CCNT2	98.6685	-1.95066	0.739052	-2.63941	0.00830515	0.0491343		ENSG00000082438	COBLL1	484.411	-3.43136	0.731165	-4.69301	2.6922e-06	8.00555e-05		Nfe2l1__chr11	-1.18398	0.00532093
ENSG00000144224	UBXN4	463.438	-2.02306	0.575019	-3.51825	0.000434399	0.00525623		ENSG00000169432	SCN9A	62.9607	-5.19896	1.22065	-4.25917	2.05188e-05	0.000429622		Dusp11__chr6	-1.20117	0.0275528
ENSG00000150540	HNMT	271.607	-1.68886	0.62664	-2.69511	0.0070366	0.0436548		ENSG00000073734	ABCB11	70.7145	-9.57299	1.7935	-5.33759	9.41893e-08	4.81419e-06		Pde4b__chr4	-1.20189	0.025016
ENSG00000075884	ARHGAP15	42.4079	-6.51629	1.34309	-4.85171	1.224e-06	4.74069e-05		ENSG00000138385	SSB	602.574	1.86301	0.670013	2.78055	0.00542663	0.0363735		Ube2h__chr6	-1.20207	0.0422071
ENSG00000169554	ZEB2	142.81	-7.11661	1.11178	-6.40109	1.54272e-10	2.26316e-08		ENSG00000138382	METTL5	511.069	2.05325	0.653365	3.14258	0.00167468	0.0151191		Dusp3__chr11	-1.20383	0.041699
ENSG00000135999	EPC2	58.2246	-2.83706	0.788234	-3.59926	0.000319126	0.00412971		ENSG00000144357	UBR3	117.594	-3.88563	0.859431	-4.52116	6.15012e-06	0.000157929		Pcmtd1__chr1	-1.20557	0.00282287
ENSG00000150556	LYPD6B	9.36607	6.93492	2.49045	2.7846	0.00535935	0.0357657		ENSG00000204335	SP5	147.211	5.18817	1.44695	3.58559	0.000336313	0.0042436		Cox16__chr12	-1.20726	0.0304581
ENSG00000187123	LYPD6	27.3436	6.26971	1.99807	3.13788	0.00170176	0.0150534		ENSG00000115806	GORASP2	419.98	1.75771	0.677451	2.5946	0.00947018	0.0557		Ipo5__chr14	-1.21249	0.0460731
ENSG00000115963	RND3	96.6464	-3.08826	1.08448	-2.8477	0.00440368	0.0308357		ENSG00000198586	TLK1	198.259	-1.69813	0.734944	-2.31056	0.020857	0.0981674		Pkp4__chr2	-1.21281	0.0196693
ENSG00000123609	NMI	61.4102	-1.76607	0.744908	-2.37086	0.0177467	0.0861709		ENSG00000128708	HAT1	328.406	2.14571	0.704252	3.0468	0.00231294	0.0193022		Apom__chr17	-1.23642	0.0135796
ENSG00000136536	2007-03-01	656.268	-1.79485	0.750778	-2.39065	0.0168186	0.0825593		ENSG00000144354	CDCA7	81.2245	5.06923	1.57981	3.20875	0.00133314	0.0125752		Dnajc1__chr2	-1.24128	0.0108693
ENSG00000115267	IFIH1	40.3991	-2.3332	0.989088	-2.35894	0.0183275	0.0880366		ENSG00000138430	OLA1	370.213	1.99797	0.668206	2.99005	0.00278928	0.0221015		Srsf11__chr3	-1.24131	0.00514548
ENSG00000184611	KCNH7	12.0135	-7.06007	2.2462	-3.14311	0.00167162	0.0148627		ENSG00000115935	WIPF1	41.3707	-6.30525	1.53821	-4.09909	4.1477e-05	0.000781566		Serpina1c__chr12	-1.24147	0.0400344
ENSG00000115290	GRB14	167.202	-2.07841	0.845331	-2.4587	0.0139442	0.0717653		ENSG00000154518	ATP5G3	7860.08	3.20624	0.672328	4.76886	1.8527e-06	5.95172e-05		Phlda1__chr10	-1.24326	0.0377029
ENSG00000082438	COBLL1	611.966	-3.80218	0.668264	-5.68964	1.27306e-08	1.00493e-06		ENSG00000128654	MTX2	209.333	2.58068	0.79981	3.22661	0.00125265	0.012012		Brwd1__chr16	-1.2448	0.0264673
ENSG00000169432	SCN9A	84.9154	-5.65204	1.11841	-5.05365	4.33437e-07	1.99033e-05		ENSG00000170144	HNRNPA3	394.53	-1.79849	0.679749	-2.64582	0.00814943	0.0497158		Hsp90b1__chr10	-1.24558	0.00204679
ENSG00000073734	ABCB11	52.7405	-9.18737	1.83864	-4.99682	5.82825e-07	2.56273e-05		ENSG00000116044	NFE2L2	850.253	2.57813	0.703786	3.66323	0.000249052	0.00335947		Xrn2__chr2	-1.2489	0.0118783
ENSG00000138382	METTL5	389.053	1.70769	0.688839	2.47909	0.0131718	0.0687861		ENSG00000155657	TTN	40.2994	-3.29488	1.19106	-2.76633	0.00566913	0.0375237		Lpin2__chr17	-1.25079	0.0246507
ENSG00000144357	UBR3	103.8	-3.76521	0.788596	-4.77458	1.8008e-06	6.32454e-05		ENSG00000138434	SSFA2	276.817	-1.73439	0.691759	-2.50722	0.0121684	0.0667824		Twistnb__chr12	-1.25178	0.0306667
ENSG00000204335	SP5	95.3617	5.23319	1.42512	3.67211	0.000240552	0.00324731		ENSG00000188738	FSIP2	176.995	-2.69049	0.758509	-3.54708	0.00038952	0.00477148		Son__chr16	-1.25842	0.0334101
ENSG00000198586	TLK1	202.548	-1.94208	0.769435	-2.52404	0.0116015	0.0626647		ENSG00000144366	GULP1	41.5274	3.0344	1.1781	2.57566	0.0100048	0.0579913		Rabac1__chr7	-1.2589	0.0251585
ENSG00000144354	CDCA7	46.7885	9.26982	1.57808	5.87411	4.25114e-09	4.02692e-07		ENSG00000151687	ANKAR	31.398	-3.54207	1.30901	-2.70591	0.00681178	0.0432784		Fuca1__chr4	-1.26471	0.043808
ENSG00000115935	WIPF1	23.7875	-5.63885	1.4441	-3.90477	9.43168e-05	0.00151943		ENSG00000138378	STAT4	9.93195	-6.70654	2.74066	-2.44705	0.0144031	0.0753994		Rnf187__chr11	-1.26611	0.035552
ENSG00000154518	ATP5G3	5421.88	3.01479	0.633911	4.75586	1.97599e-06	6.89601e-05		ENSG00000128641	MYO1B	431.691	-2.84396	0.854161	-3.32953	0.000869925	0.00901817		Gabarapl1__chr6	-1.26735	0.0141742
ENSG00000144320	LNPK	100.517	-2.21614	0.677764	-3.26978	0.00107631	0.0106329		ENSG00000144381	HSPD1	4567.48	1.9732	0.587321	3.35967	0.000780369	0.00823506		Ctsz__chr2	-1.2703	0.0303276
ENSG00000197557	TTC30A	8.94169	5.31076	1.9453	2.73005	0.00633245	0.0403743		ENSG00000115541	HSPE1	1668.8	1.59856	0.607672	2.63062	0.00852282	0.0515746		Hyal2__chr9	-1.27223	0.0255842
ENSG00000155657	TTN	58.0239	-3.87655	0.939389	-4.12667	3.68049e-05	0.000723742		ENSG00000270757	HSPE1-MOB4	861.132	2.14876	0.629459	3.41366	0.000640971	0.0070476		BC003331__chr1	-1.27911	0.00339783
ENSG00000138434	SSFA2	408.583	-2.57789	0.616348	-4.18252	2.88298e-05	0.000595899		ENSG00000115540	MOB4	188.049	2.11633	0.752834	2.81115	0.00493641	0.033833		Atp11c__chrX	-1.27974	0.032908
ENSG00000188738	FSIP2	189.825	-2.86288	1.05885	-2.70377	0.00685579	0.0428146		ENSG00000138356	AOX1	1110.18	-1.6369	0.615158	-2.66094	0.00779226	0.0482411		Wdr33__chr18	-1.28717	0.0212224
ENSG00000064989	CALCRL	82.8302	-3.34324	0.983614	-3.39893	0.000676491	0.00735357		ENSG00000082153	BZW1	1185.15	1.7298	0.62129	2.78421	0.00536581	0.0360833		Crat__chr2	-1.28753	0.00998412
ENSG00000138449	SLC40A1	1022.81	-2.75068	0.73577	-3.73851	0.000185114	0.00263402		ENSG00000082126	MPP4	107.685	3.46348	0.877151	3.94855	7.86247e-05	0.00131594		Cstf3__chr2	-1.29099	0.038373
ENSG00000187699	C2orf88	27.6894	-2.88667	1.14666	-2.51746	0.0118205	0.0635372		ENSG00000116030	SUMO1	949.301	2.41776	0.64365	3.75633	0.000172421	0.00249011		Mtdh__chr15	-1.29122	0.00149662
ENSG00000198130	HIBCH	278.115	-1.60902	0.646974	-2.487	0.0128825	0.0676228		ENSG00000204217	BMPR2	145.993	-1.90225	0.823625	-2.30961	0.0209097	0.0983571		Atp2b1__chr10	-1.29413	0.0128468
ENSG00000128641	MYO1B	577.475	-3.50966	0.738275	-4.75387	1.99563e-06	6.92896e-05		ENSG00000163596	ICA1L	102.653	2.0859	0.86793	2.4033	0.0162478	0.0820237		Pan3__chr5	-1.29435	0.0294513
ENSG00000168497	CAVIN2	119.485	-7.30847	1.1178	-6.53827	6.22342e-11	1.01143e-08		ENSG00000138443	ABI2	545.355	-1.70762	0.712409	-2.39696	0.0165318	0.0830899		Clcn4-2__chr7	-1.295	0.0184876
ENSG00000138411	HECW2	34.6666	-3.22044	0.984184	-3.27219	0.00106718	0.010549		ENSG00000173166	RAPH1	428.266	-3.86627	0.772191	-5.00688	5.53189e-07	2.1691e-05		Cdh1__chr8	-1.29913	0.0391085
ENSG00000144381	HSPD1	3544.46	1.57422	0.596581	2.63873	0.00832171	0.0492148		ENSG00000116117	PARD3B	106.18	-3.3889	0.978872	-3.46205	0.000536076	0.00610836		Ccdc107__chr4	-1.29938	0.0342644
ENSG00000226124	FTCDNL1	34.9945	-3.58434	1.11644	-3.21052	0.00132497	0.012409		ENSG00000114933	INO80D	144.21	-3.99765	0.866546	-4.61331	3.96299e-06	0.000110091		Psmd7__chr8	-1.30096	0.00341257
ENSG00000138356	AOX1	2339.44	-2.98999	0.820239	-3.64527	0.000267113	0.00354518		ENSG00000114942	EEF1B2	3161.98	2.33747	0.599617	3.89828	9.68782e-05	0.00157027		Cdk11b__chr4	-1.30145	0.00206779
ENSG00000013441	CLK1	247.53	-1.70837	0.670232	-2.54892	0.0108057	0.0595698		ENSG00000118263	KLF7	29.646	-3.74439	1.39592	-2.68237	0.00731015	0.0457721		Scarb2__chr5	-1.31217	0.022104
ENSG00000115993	TRAK2	82.1289	-2.5257	0.847248	-2.98106	0.00287251	0.0223138		ENSG00000163251	FZD5	313.079	-2.43688	0.682992	-3.56795	0.000359782	0.00446879		Nelfcd__chr2	-1.32646	0.0189687
ENSG00000082126	MPP4	73.8261	3.22596	0.944394	3.41591	0.000635702	0.00706303		ENSG00000138413	IDH1	4486.84	2.58848	0.684169	3.78339	0.000154705	0.00229376		Apoa1__chr9	-1.32646	0.00140051
ENSG00000003393	ALS2	71.7993	-2.27421	0.804194	-2.82793	0.00468498	0.0323021		ENSG00000078018	MAP2	49.7397	-2.90209	1.12842	-2.57181	0.0101168	0.058368		Trabd__chr15	-1.32651	0.0308032
ENSG00000204217	BMPR2	184.17	-2.32593	0.78747	-2.95368	0.00314014	0.0237799		ENSG00000138363	ATIC	531.639	2.64176	0.650025	4.06409	4.82199e-05	0.000882662		Strn4__chr7	-1.32852	0.0323989
ENSG00000173166	RAPH1	319.616	-3.28941	0.873042	-3.76776	0.000164717	0.00239309		ENSG00000079246	XRCC5	1160.51	1.47816	0.608014	2.43113	0.0150519	0.0777776		Celf1__chr2	-1.33269	0.00236527
ENSG00000116117	PARD3B	74.5586	-3.18915	0.807099	-3.95138	7.77026e-05	0.00129585		ENSG00000197756	RPL37A	4251.02	1.38527	0.588726	2.353	0.0186228	0.090887		Acsl1__chr8	-1.33901	0.0154708
ENSG00000114933	INO80D	99.6115	-3.43281	0.874238	-3.92663	8.61442e-05	0.00140969		ENSG00000079308	TNS1	330.032	-6.71862	0.825327	-8.14055	3.93478e-16	1.33933e-13		Fam134a__chr1	-1.34067	0.0391909
ENSG00000114942	EEF1B2	2392.03	1.93108	0.810199	2.38346	0.0171507	0.0839405		ENSG00000163466	ARPC2	2767.47	2.94497	0.592575	4.96978	6.703e-07	2.54714e-05		Stk38__chr17	-1.34297	0.00239262
ENSG00000118263	KLF7	44.2188	-4.3293	1.17289	-3.69116	0.000223238	0.0030685		ENSG00000179921	GPBAR1	13.917	-6.87237	2.51933	-2.72785	0.00637481	0.0411061		Ndufb7__chr8	-1.34391	0.0165087
ENSG00000118260	CREB1	81.052	-1.93498	0.820409	-2.35856	0.0183462	0.0880756		ENSG00000127831	VIL1	332.287	2.49208	0.817922	3.04684	0.00231259	0.0193022		Itih1__chr14	-1.35247	0.0240405
ENSG00000163249	CCNYL1	56.57	-2.18886	0.905413	-2.41753	0.0156262	0.078094		ENSG00000135929	CYP27A1	2358.56	-1.84752	0.657163	-2.81136	0.00493319	0.0338282		Atf5__chr7	-1.35443	0.0427819
ENSG00000163251	FZD5	203.762	-1.87247	0.749874	-2.49704	0.0125234	0.0663262		ENSG00000115657	ABCB6	221.66	2.58738	0.725227	3.56768	0.000360151	0.00446989		Gart__chr16	-1.36233	0.0479521
ENSG00000144445	KANSL1L	76.4148	-1.68131	0.733497	-2.29218	0.0218952	0.0997135		ENSG00000115661	STK16	246.887	1.80747	0.754658	2.39508	0.0166167	0.0834646		Rp9__chr9	-1.3648	0.00869347
ENSG00000115361	ACADL	37.0023	-6.03405	1.29436	-4.6618	3.13452e-06	9.7855e-05		ENSG00000127824	TUBA4A	2830.04	5.63634	0.6215	9.06892	1.20203e-19	6.00941e-17		Eef2__chr10	-1.36677	0.0297479
ENSG00000138363	ATIC	377.692	2.46168	0.96403	2.55353	0.0106636	0.0589233		ENSG00000243910	TUBA4B	286.751	5.36988	0.822828	6.52612	6.74949e-11	8.11868e-09		Gclc__chr9	-1.36955	0.00509922
ENSG00000115457	IGFBP2	767.099	-5.35902	0.872428	-6.14265	8.11564e-10	9.74877e-08		ENSG00000135924	DNAJB2	70.8145	-2.29905	0.948918	-2.42281	0.0154009	0.0790451		Ints4__chr7	-1.37092	0.0333243
ENSG00000079308	TNS1	196.968	-5.94545	0.901023	-6.59855	4.15187e-11	7.3068e-09		ENSG00000123989	CHPF	729.656	2.09333	0.72331	2.8941	0.00380249	0.0279761		Xpo7__chr14	-1.37137	0.00157635
ENSG00000163466	ARPC2	2064.41	2.35768	0.69784	3.37854	0.000728729	0.00781381		ENSG00000124006	OBSL1	197.015	-3.49806	1.03562	-3.37774	0.000730851	0.00779477		Slc27a5__chr7	-1.37266	0.00663329
ENSG00000127831	VIL1	209.67	2.51839	0.834245	3.01876	0.00253807	0.0203648		ENSG00000135900	MRPL44	188.68	2.30441	0.780472	2.95259	0.00315123	0.0243425		Larp1b__chr3	-1.37359	0.000479318
ENSG00000115661	STK16	186.262	1.69427	0.702296	2.41247	0.0158447	0.0786907		ENSG00000135919	SERPINE2	767.194	3.8819	0.673114	5.76708	8.0656e-09	5.97377e-07		Abcc2__chr19	-1.37711	0.0179887
ENSG00000127824	TUBA4A	2026.87	3.68301	0.716896	5.13744	2.78506e-07	1.38642e-05		ENSG00000169047	IRS1	119.256	-1.98196	0.820118	-2.41668	0.0156629	0.0799473		Nsd1__chr13	-1.37964	0.00560412
ENSG00000243910	TUBA4B	190.024	5.0217	0.910257	5.5168	3.4523e-08	2.38453e-06		ENSG00000115009	CCL20	1014.42	4.04701	0.848402	4.77015	1.84084e-06	5.92552e-05		Spg7__chr8	-1.38195	0.0142426
ENSG00000123989	CHPF	499.577	2.16304	0.586058	3.69083	0.000223524	0.00306989		ENSG00000153823	PID1	212.523	-3.5055	0.929827	-3.77006	0.00016321	0.00237394		Apoh__chr11	-1.38484	0.00583413
ENSG00000124003	MOGAT1	9.52354	-6.70889	2.63638	-2.54474	0.0109361	0.0599859		ENSG00000135899	SP110	79.4592	-2.93125	0.938985	-3.12172	0.00179796	0.0159003		1300017J02Rik__chr9	-1.38699	0.0412138
ENSG00000135919	SERPINE2	494.148	4.47609	0.77682	5.76208	8.3086e-09	7.13636e-07		ENSG00000067066	SP100	208.782	-1.95917	0.739991	-2.64756	0.00810743	0.0495501		Creb3__chr4	-1.391	0.0495232
ENSG00000036257	CUL3	136.887	-2.43338	0.781278	-3.11462	0.00184182	0.015902		ENSG00000204128	C2orf72	308.892	-3.01447	0.696705	-4.32675	1.51325e-05	0.000334378		Il6st__chr13	-1.39808	0.0371908
ENSG00000115009	CCL20	590.054	6.77759	2.33863	2.8981	0.0037543	0.0272665		ENSG00000115053	NCL	3329.04	2.45379	0.589483	4.16262	3.14623e-05	0.000618347		Cyp4f13__chr17	-1.39846	0.0307676
ENSG00000153823	PID1	185.947	-3.14447	1.02366	-3.07179	0.00212777	0.0177068		ENSG00000187514	PTMA	3865.48	1.75199	0.605992	2.89111	0.00383879	0.0281357		H6pd__chr4	-1.39888	0.0285724
ENSG00000135899	SP110	76.8545	-2.94447	0.809436	-3.63768	0.000275103	0.00363865		ENSG00000182600	C2orf82	128.83	-3.55952	0.848872	-4.19323	2.75004e-05	0.00055201		Whamm__chr7	-1.39903	0.0188695
ENSG00000067066	SP100	276.337	-2.60408	0.637853	-4.08257	4.45405e-05	0.000839348		ENSG00000242366	UGT1A8	3621.74	4.38586	0.814798	5.38276	7.33525e-08	3.97566e-06		Myo6__chr9	-1.39997	0.0163281
ENSG00000204128	C2orf72	239.26	-2.69135	0.815351	-3.30085	0.000963932	0.00973149		ENSG00000242515	UGT1A10	3874.49	4.1904	0.763738	5.4867	4.0951e-08	2.39976e-06		Pik3ca__chr3	-1.40087	0.013486
ENSG00000115053	NCL	2354.17	2.39355	0.697993	3.42918	0.000605405	0.00680855		ENSG00000241119	UGT1A9	3641.16	4.35387	0.820098	5.30897	1.10247e-07	5.46046e-06		Ankrd17__chr5	-1.40095	0.00292125
ENSG00000123485	HJURP	24.6023	3.85797	1.40767	2.74068	0.0061313	0.0394866		ENSG00000244122	UGT1A7	3630.91	4.37275	0.817016	5.3521	8.69387e-08	4.53044e-06		Mtch1__chr17	-1.40297	0.0301376
ENSG00000144481	TRPM8	263.359	-5.96172	1.22409	-4.87033	1.11413e-06	4.37652e-05		ENSG00000167165	UGT1A6	4238.12	4.44769	0.879996	5.05422	4.3216e-07	1.78188e-05		Anp32a__chr9	-1.40708	0.0193849
ENSG00000072080	SPP2	186.91	-5.47404	0.814628	-6.71968	1.82123e-11	3.51053e-09		ENSG00000240224	UGT1A5	3724.75	4.44175	0.81933	5.4212	5.92019e-08	3.28858e-06		Eif4g3__chr4	-1.40977	0.0184227
ENSG00000144476	ACKR3	17.1506	4.64653	1.7671	2.62947	0.0085518	0.0501284		ENSG00000244474	UGT1A4	4197.14	4.57836	0.851933	5.37409	7.69699e-08	4.13209e-06		Syngr2__chr11	-1.41053	0.00936443
ENSG00000163359	COL6A3	107.181	-2.58696	0.755472	-3.4243	0.000616392	0.00690867		ENSG00000243135	UGT1A3	4124.71	4.17223	0.744841	5.60151	2.12494e-08	1.33313e-06		Ikzf5__chr7	-1.41063	0.00365533
ENSG00000124839	RAB17	498.455	-2.4383	0.755932	-3.22556	0.00125728	0.0119438		ENSG00000241635	UGT1A1	5365.92	4.36643	0.73016	5.9801	2.23007e-09	1.98204e-07		Zfp384__chr6	-1.41171	0.0499228
ENSG00000124831	LRRFIP1	671.197	-1.92001	0.647352	-2.96595	0.00301753	0.0230727		ENSG00000123485	HJURP	39.5466	3.0476	1.24902	2.44	0.0146873	0.0763875		Klkb1__chr8	-1.41462	0.0485932
ENSG00000144485	HES6	63.7177	2.74579	0.91077	3.0148	0.00257152	0.0205527		ENSG00000144481	TRPM8	157.18	-5.1823	0.877063	-5.90869	3.44837e-09	2.82908e-07		Daam1__chr12	-1.41802	0.00530779
ENSG00000142330	CAPN10	45.2749	4.24274	0.945057	4.48939	7.14258e-06	0.000190625		ENSG00000072080	SPP2	448.706	-6.71937	0.783343	-8.57781	9.66997e-18	4.07106e-15		Mfsd11__chr11	-1.41921	0.0382052
ENSG00000178623	GPR35	95.0402	6.38045	1.01182	6.30589	2.86534e-10	3.79991e-08		ENSG00000198612	COPS8	288.98	2.52346	0.836142	3.01799	0.0025446	0.0207489		Pwwp2a__chr11	-1.42034	0.0414982
ENSG00000172482	AGXT	5871.83	-3.7869	0.975319	-3.88273	0.000103292	0.00164142		ENSG00000132329	RAMP1	732.947	4.81583	1.04754	4.59727	4.28071e-06	0.000117065		Bfar__chr16	-1.42451	0.0063873
ENSG00000162804	SNED1	36.8391	-2.89855	1.07732	-2.69052	0.00713398	0.0441104		ENSG00000144485	HES6	87.333	3.41814	0.910356	3.75473	0.000173528	0.00250325		Wbscr27__chr5	-1.42932	0.0350508
ENSG00000168393	DTYMK	207.507	2.46401	0.913648	2.69689	0.00699909	0.0434546		ENSG00000142327	RNPEPL1	200.221	-1.872	0.745788	-2.5101	0.0120698	0.066355		Prrg2__chr7	-1.43701	0.0368368
ENSG00000204099	NEU4	129.877	-2.66611	0.767909	-3.47191	0.00051677	0.00601216		ENSG00000178623	GPR35	158.919	4.55154	1.13669	4.0042	6.22282e-05	0.00109159		Ccnl2__chr4	-1.44421	0.0487791
ENSG00000150995	ITPR1	11.1691	-3.37227	1.39676	-2.41435	0.0157631	0.0784363		ENSG00000172482	AGXT	7887.95	-4.84539	1.05132	-4.60888	4.04839e-06	0.000112052		Cpsf2__chr12	-1.44425	0.0290792
ENSG00000134107	BHLHE40	147.053	-2.37842	0.763053	-3.11697	0.00182718	0.0158408		ENSG00000172478	C2orf54	133.673	-4.6982	1.00727	-4.6643	3.09672e-06	9.007e-05		Ccar1__chr10	-1.44616	0.00407356
ENSG00000134109	EDEM1	113.711	-3.05414	0.891295	-3.42664	0.000611107	0.00685408		ENSG00000162804	SNED1	48.6365	-3.52141	1.21688	-2.89381	0.00380603	0.027982		Pcyt2__chr11	-1.45034	0.000630513
ENSG00000168137	SETD5	334.497	-2.59443	0.830353	-3.1245	0.00178111	0.0155397		ENSG00000134107	BHLHE40	316.607	-3.53288	0.790211	-4.47081	7.79251e-06	0.000193579		Fbxl17__chr17	-1.45346	0.00469054
ENSG00000241553	ARPC4	633.346	1.53458	0.621151	2.47054	0.013491	0.0700684		ENSG00000125046	SSUH2	59.3471	4.60007	1.7364	2.6492	0.00806823	0.0493974		Clmn__chr12	-1.45362	0.00251166
ENSG00000171135	JAGN1	358.302	1.80025	0.727107	2.47591	0.0132899	0.0692133		ENSG00000168137	SETD5	333.692	-2.42353	0.690661	-3.509	0.000449787	0.00533015		Psmd4__chr3	-1.45808	0.00314806
ENSG00000125037	EMC3	759.349	1.9668	0.619027	3.17725	0.00148679	0.0135421		ENSG00000241553	ARPC4	864.394	1.54392	0.618246	2.49726	0.0125156	0.068034		Dhx36__chr3	-1.45987	0.0232428
ENSG00000254999	BRK1	752.093	1.60494	0.635366	2.52601	0.0115365	0.0624049		ENSG00000187288	CIDEC	38.6132	5.19249	1.67345	3.10288	0.0019165	0.0166903		Hnrnpr__chr4	-1.46113	0.0231237
ENSG00000157020	SEC13	775.457	1.98579	0.619186	3.2071	0.0013408	0.0125219		ENSG00000171135	JAGN1	521.48	1.48166	0.641615	2.30926	0.020929	0.0984194		Ctcf__chr8	-1.46787	0.0089569
ENSG00000157087	ATP2B2	116.824	-3.1003	1.13608	-2.72894	0.00635377	0.040479		ENSG00000163702	IL17RC	269.399	-2.00151	0.703375	-2.84558	0.00443305	0.0314083		Mir22hg__chr11	-1.46851	0.0130495
ENSG00000132164	SLC6A11	211.065	6.26646	2.53097	2.47591	0.0132898	0.0692133		ENSG00000125037	EMC3	1022.37	2.25874	0.613957	3.67898	0.000234166	0.00320461		Rabep1__chr11	-1.47281	0.0248247
ENSG00000157103	SLC6A1	140.145	-3.26626	0.849225	-3.84616	0.000119983	0.00184675		ENSG00000157020	SEC13	1031.67	2.39649	0.612446	3.91297	9.11661e-05	0.00149128		Hspa1b__chr17	-1.47283	0.0334735
ENSG00000144713	RPL32	3041.85	2.09461	0.771159	2.71619	0.0066038	0.0416082		ENSG00000157087	ATP2B2	108.909	-3.99457	1.11061	-3.59675	0.000322218	0.00412326		Mettl7b__chr10	-1.48033	0.0405487
ENSG00000144711	IQSEC1	138.92	-2.2852	0.719751	-3.17498	0.00149846	0.0136011		ENSG00000157103	SLC6A1	243.232	-4.07086	0.733035	-5.55343	2.80114e-08	1.69745e-06		D19Bwg1357e__chr19	-1.48107	0.0374245
ENSG00000131370	SH3BP5	73.1357	-2.0329	0.716034	-2.83912	0.00452384	0.0314694		ENSG00000144713	RPL32	4254.74	2.06026	0.595691	3.4586	0.000542986	0.00616952		Rb1cc1__chr1	-1.48252	0.0220254
ENSG00000169814	BTD	502.889	1.98964	0.745678	2.66823	0.00762514	0.0463011		ENSG00000144711	IQSEC1	288.255	-3.37931	0.701726	-4.81571	1.46674e-06	4.86825e-05		Smim19__chr8	-1.48403	0.0365059
ENSG00000206560	ANKRD28	73.6297	-3.58128	0.967129	-3.703	0.000213067	0.00295565		ENSG00000131373	HACL1	456.402	1.94069	0.723097	2.68385	0.0072779	0.0456238		Msl2__chr9	-1.48706	0.000185098
ENSG00000131378	RFTN1	58.0986	-5.41701	1.31732	-4.11216	3.91981e-05	0.000761767		ENSG00000169814	BTD	746.167	1.64728	0.624371	2.63831	0.00833213	0.0506065		Dcaf11__chr14	-1.48733	0.000642789
ENSG00000182568	SATB1	62.3949	-3.03127	1.17875	-2.5716	0.010123	0.056865		ENSG00000206560	ANKRD28	109.587	-4.09272	0.903087	-4.53192	5.84491e-06	0.000151061		Zc3h13__chr14	-1.49355	0.0215105
ENSG00000114166	KAT2B	122.777	-4.86726	0.846794	-5.74786	9.0378e-09	7.45371e-07		ENSG00000131378	RFTN1	73.6028	-5.73721	1.20839	-4.7478	2.05642e-06	6.51458e-05		Zfp445__chr9	-1.49425	0.0412275
ENSG00000174748	RPL15	6938.76	2.12278	0.770434	2.7553	0.00586385	0.0381047		ENSG00000182568	SATB1	54.8844	-3.67114	1.46743	-2.50174	0.0123585	0.06755		Snx18__chr13	-1.49557	0.0205569
ENSG00000174738	NR1D2	71.5568	-2.02717	0.749867	-2.70337	0.00686394	0.0428402		ENSG00000114166	KAT2B	74.5319	-4.16507	1.09715	-3.79628	0.000146885	0.00219819		Qser1__chr2	-1.50202	0.0423376
ENSG00000151090	THRB	76.1434	-3.2407	0.769883	-4.20934	2.56122e-05	0.000542239		ENSG00000182247	UBE2E2	64.6314	2.90736	1.17903	2.4659	0.013667	0.0726394		Agpat5__chr8	-1.50366	0.0150944
ENSG00000077092	RARB	24.8228	-8.09965	1.79997	-4.49987	6.79943e-06	0.000183573		ENSG00000174748	RPL15	9020.15	2.89128	0.585167	4.94094	7.77461e-07	2.89252e-05		Apoe__chr7	-1.50509	0.0105731
ENSG00000077097	TOP2B	100.08	-2.08259	0.852033	-2.44426	0.0145151	0.074013		ENSG00000151090	THRB	92.6674	-3.45531	0.906349	-3.81234	0.000137655	0.00207168		Slc12a7__chr13	-1.50955	0.0130345
ENSG00000144642	RBMS3	102.001	-8.64583	1.58667	-5.44904	5.06413e-08	3.22877e-06		ENSG00000144635	DYNC1LI1	294.592	2.35972	0.70728	3.33633	0.00084892	0.00882843		Rock1__chr18	-1.51298	0.00348406
ENSG00000144635	DYNC1LI1	208.045	2.25445	0.805531	2.79872	0.00513061	0.0346719		ENSG00000170266	GLB1	1001.1	2.10455	0.621233	3.38769	0.000704832	0.00758299		Swt1__chr1	-1.5151	0.0413825
ENSG00000170266	GLB1	635.943	2.84182	0.853772	3.32855	0.000873008	0.00898872		ENSG00000170275	CRTAP	2210.81	3.2447	0.607252	5.34325	9.12938e-08	4.72659e-06		Eps8l2__chr7	-1.5203	0.0162028
ENSG00000170275	CRTAP	1583.47	2.81861	0.787614	3.57867	0.000345349	0.00441732		ENSG00000168016	TRANK1	122.256	-6.14239	1.0717	-5.73143	9.95875e-09	7.1444e-07		Zfp131__chr13	-1.53069	0.00863879
ENSG00000168016	TRANK1	72.3508	-5.11973	1.21684	-4.20738	2.5835e-05	0.000545563		ENSG00000144674	GOLGA4	441.694	-2.57508	0.657254	-3.91794	8.93086e-05	0.00146841		Eml4__chr17	-1.53106	0.0212824
ENSG00000144674	GOLGA4	640.209	-3.26734	0.63023	-5.18435	2.16766e-07	1.11942e-05		ENSG00000172939	OXSR1	83.2452	-2.49086	0.939209	-2.65208	0.00799976	0.0491287		Fahd1__chr17	-1.5407	0.0154869
ENSG00000144668	ITGA9	92.7126	-5.16553	1.02777	-5.02596	5.00928e-07	2.25553e-05		ENSG00000093217	XYLB	204.641	-2.1293	0.740075	-2.87714	0.00401301	0.0290762		Cdc37l1__chr19	-1.54585	0.0107061
ENSG00000144677	CTDSPL	218.028	-2.18151	0.893273	-2.44215	0.0146001	0.0742409		ENSG00000144655	CSRNP1	172.764	-2.53564	0.793941	-3.19375	0.0014044	0.0131236		Tmem184b__chr15	-1.54937	0.0309679
ENSG00000172939	OXSR1	69.1331	-2.34325	0.748356	-3.13119	0.00174099	0.0153106		ENSG00000188846	RPL14	4468.91	2.94961	0.59147	4.98691	6.13542e-07	2.37088e-05		Cln3__chr7	-1.55093	0.0450346
ENSG00000093217	XYLB	246.488	-2.52703	0.93826	-2.69332	0.0070745	0.043808		ENSG00000168038	ULK4	72.445	3.2729	1.25943	2.59871	0.00935751	0.0552642		mtNd6__chrM	-1.55665	0.027955
ENSG00000170011	MYRIP	93.1079	-3.52214	1.04229	-3.37925	0.000726851	0.00779871		ENSG00000182606	TRAK1	81.1395	-2.57396	0.913574	-2.81747	0.00484044	0.0333782		Chd1__chr17	-1.55783	0.0232603
ENSG00000188846	RPL14	3163.34	2.68274	0.654602	4.09828	4.16234e-05	0.0007986		ENSG00000187094	CCK	129.139	5.51124	1.22399	4.50268	6.71011e-06	0.000170665		Atp5e__chr2	-1.55908	0.00165302
ENSG00000168038	ULK4	49.1086	3.66211	1.41365	2.59053	0.00958287	0.0547022		ENSG00000114857	NKTR	405.191	-3.15639	0.670642	-4.70653	2.51971e-06	7.5629e-05		Edc4__chr8	-1.56401	0.0214163
ENSG00000187094	CCK	82.985	5.8979	1.22833	4.80158	1.57421e-06	5.67835e-05		ENSG00000280571	AC099329.3	302.298	2.24615	0.915914	2.45236	0.0141923	0.0743962		Mpp6__chr6	-1.56601	0.00649974
ENSG00000114812	VIPR1	93.9569	-3.22806	1.07606	-2.99988	0.00270084	0.0213199		ENSG00000180432	CYP8B1	2350.6	-6.06964	0.799852	-7.58846	3.23728e-14	8.09218e-12		Rnf152__chr1	-1.56955	0.0333022
ENSG00000114857	NKTR	464.311	-3.4305	0.788431	-4.35105	1.35488e-05	0.000319973		ENSG00000144647	POMGNT2	114.765	2.49608	0.831121	3.00327	0.00267097	0.0214186		Vezt__chr10	-1.57497	0.0231979
ENSG00000244607	CCDC13	24.6414	-5.13061	1.44745	-3.54458	0.00039324	0.00489763		ENSG00000172215	CXCR6	9.98754	-6.78076	2.73481	-2.47943	0.0131594	0.0706218		Ctsa__chr2	-1.57602	0.0491453
ENSG00000180432	CYP8B1	1666.81	-6.39286	0.943613	-6.77487	1.24517e-11	2.54829e-09		ENSG00000163825	RTP3	264.683	-4.90088	1.36644	-3.5866	0.000335024	0.00423695		Ypel2__chr11	-1.59058	0.0236294
ENSG00000144649	FAM198A	17.0857	-4.29509	1.39731	-3.07383	0.0021133	0.0176041		ENSG00000178038	ALS2CL	314.582	-3.18462	0.715023	-4.45388	8.43327e-06	0.000206609		Zzef1__chr11	-1.592	0.0248116
ENSG00000144647	POMGNT2	84.9639	2.12379	0.82803	2.56487	0.0103213	0.0577056		ENSG00000160801	PTH1R	30.9058	-6.53688	2.11224	-3.09476	0.0019697	0.0170423		Atxn2__chr5	-1.59538	0.00639543
ENSG00000163788	SNRK	117.88	-2.09101	0.733565	-2.85048	0.00436533	0.0306368		ENSG00000181555	SETD2	159.73	-2.70916	0.775714	-3.49247	0.000478574	0.00561718		Esyt2__chr12	-1.59598	0.0423378
ENSG00000196653	ZNF502	11.006	-5.62126	2.20111	-2.55383	0.0106544	0.0589014		ENSG00000164050	PLXNB1	716.612	-2.51808	0.637213	-3.95171	7.75934e-05	0.00130256		Fbxo21__chr5	-1.59631	0.0243378
ENSG00000163820	FYCO1	52.4291	-2.50634	0.920749	-2.72207	0.00648743	0.0410623		ENSG00000164051	CCDC51	297.863	1.64028	0.687537	2.38574	0.0170448	0.0850275		Smim13__chr13	-1.59752	0.00500464
ENSG00000163823	CCR1	24.8828	-6.4391	1.92943	-3.33731	0.000845924	0.00878224		ENSG00000232112	TMA7	1412.19	1.84091	0.652327	2.82207	0.00477151	0.033033		2810007J24Rik__chr7	-1.60286	0.0111046
ENSG00000241186	TDGF1	48.2905	3.11364	0.991497	3.14035	0.00168747	0.014975		ENSG00000225697	SLC26A6	235.181	4.22494	0.749298	5.63852	1.71513e-08	1.13853e-06		Mlxipl__chr5	-1.6038	0.0217146
ENSG00000160801	PTH1R	39.8555	-8.77959	1.78298	-4.92411	8.4744e-07	3.47723e-05		ENSG00000178537	SLC25A20	267.753	-2.73392	0.711709	-3.84135	0.00012236	0.00188404		Taok1__chr11	-1.60435	0.0129978
ENSG00000181555	SETD2	158.73	-2.81614	0.720487	-3.90867	9.28074e-05	0.00150095		ENSG00000172037	LAMB2	761.631	-1.57368	0.6784	-2.3197	0.0203572	0.0967829		Sema4g__chr19	-1.6063	0.027585
ENSG00000172113	NME6	115.263	2.0811	0.712571	2.92055	0.0034941	0.0259018		ENSG00000233276	GPX1	1176.98	-2.87507	1.24291	-2.31318	0.0207125	0.0977546		H2-K1__chr17	-1.60887	0.000546516
ENSG00000232112	TMA7	1050.45	1.74369	0.735933	2.36936	0.0178187	0.086369		ENSG00000067560	RHOA	4357.24	2.40041	0.597446	4.01779	5.8746e-05	0.00104087		Tnrc6a__chr7	-1.61214	0.022899
ENSG00000164054	SHISA5	1578.83	2.26355	0.622042	3.6389	0.000273807	0.00362822		ENSG00000164061	BSN	16.177	-4.85198	1.97214	-2.46026	0.0138836	0.0733895		Sltm__chr9	-1.61267	0.00869466
ENSG00000225697	SLC26A6	182.778	2.50185	0.727925	3.43696	0.000588284	0.0066708		ENSG00000173531	MST1	1806.18	-2.35806	0.810949	-2.90778	0.00364008	0.027073		Zcchc11__chr4	-1.61285	0.0205584
ENSG00000008300	CELSR3	24.7858	6.55635	1.56425	4.19138	2.77263e-05	0.000573894		ENSG00000182179	UBA7	141.312	-3.01594	0.804018	-3.75109	0.000176071	0.0025308		Aebp2__chr6	-1.61362	0.0139237
ENSG00000178537	SLC25A20	242.207	-2.73245	0.674388	-4.05174	5.08382e-05	0.000940563		ENSG00000183763	TRAIP	15.0215	7.3103	2.41425	3.02799	0.0024619	0.0203018		Clk3__chr9	-1.61604	0.00990229
ENSG00000178467	P4HTM	140.734	4.24684	0.895148	4.74428	2.09247e-06	7.16671e-05		ENSG00000214706	IFRD2	705.475	1.95851	0.639859	3.06084	0.00220718	0.0185979		Calr__chr8	-1.61757	0.0031234
ENSG00000067560	RHOA	3366.22	1.84055	0.626283	2.93885	0.00329429	0.0247213		ENSG00000068001	HYAL2	366.371	2.17327	0.720834	3.01494	0.0025703	0.0209048		Rassf3__chr10	-1.6178	0.000359517
ENSG00000182179	UBA7	106.789	-2.74872	0.850318	-3.23258	0.00122677	0.0117414		ENSG00000114383	TUSC2	325.016	1.58841	0.684431	2.32078	0.0202989	0.0965918		Ccdc28a__chr10	-1.61787	0.0104379
ENSG00000183763	TRAIP	10.593	4.34865	1.71806	2.53114	0.0113692	0.0617114		ENSG00000114737	CISH	148.076	-4.24522	0.868531	-4.88782	1.0196e-06	3.59127e-05		Rnf170__chr8	-1.62279	0.0271924
ENSG00000012171	SEMA3B	43.9923	2.74539	0.920776	2.98161	0.0028674	0.0222845		ENSG00000164080	RAD54L2	314.131	-1.97885	0.752248	-2.63059	0.00852377	0.0515746		Hmgb3__chrX	-1.6277	0.0335418
ENSG00000114383	TUSC2	244.232	1.45151	0.598897	2.42363	0.0153662	0.077288		ENSG00000162244	RPL29	8159.08	2.68757	0.653264	4.11407	3.88751e-05	0.000741267		Topors__chr4	-1.63007	0.0178848
ENSG00000114395	CYB561D2	134.454	1.84821	0.645724	2.86222	0.00420679	0.0297254		ENSG00000114841	DNAH1	164.232	-3.74316	0.842944	-4.44058	8.9717e-06	0.000216485		Trmt6__chr2	-1.63205	0.0145986
ENSG00000162244	RPL29	5708.39	2.83448	0.790556	3.58542	0.000336533	0.0043313		ENSG00000163930	BAP1	268.03	-1.78065	0.712174	-2.5003	0.0124089	0.0676886		Rab1b__chr19	-1.63273	0.0350985
ENSG00000023330	ALAS1	631.664	-1.46016	0.62798	-2.32517	0.0200627	0.0938428		ENSG00000168268	NT5DC2	235.958	2.54312	0.721056	3.52694	0.000420391	0.00507962		Nenf__chr1	-1.63311	0.0319726
ENSG00000010327	STAB1	262.517	-3.15165	0.836044	-3.76972	0.000163434	0.00237652		ENSG00000163939	PBRM1	237.656	-1.72311	0.712072	-2.41985	0.015527	0.0794629		Tbc1d8b__chrX	-1.63449	0.00176761
ENSG00000168268	NT5DC2	176.249	2.19238	0.763853	2.87016	0.00410264	0.0291746		ENSG00000016864	GLT8D1	239.157	1.67162	0.719416	2.32358	0.0201482	0.0960173		Gba__chr3	-1.636	0.0294723
ENSG00000163939	PBRM1	198.865	-1.62097	0.6309	-2.5693	0.0101905	0.0571284		ENSG00000114902	SPCS1	2967.96	2.80285	0.597662	4.6897	2.73612e-06	8.09103e-05		Ggnbp2__chr11	-1.63875	1.32e-06
ENSG00000114902	SPCS1	2087.88	2.63432	0.816903	3.22476	0.00126078	0.0119579		ENSG00000055957	ITIH1	3814.69	-2.37565	0.595573	-3.98884	6.63964e-05	0.00115332		2900026A02Rik__chr5	-1.63997	0.00556137
ENSG00000055957	ITIH1	2500.56	-1.87988	0.631398	-2.97733	0.00290774	0.0224716		ENSG00000055955	ITIH4	6737.85	-3.49858	0.975797	-3.58536	0.000336612	0.0042436		Adipor2__chr6	-1.64195	9.64e-05
ENSG00000055955	ITIH4	7315.51	-3.16079	0.896748	-3.52473	0.000423919	0.00516334		ENSG00000243696	AC006254.1	6750.51	-3.46602	0.972993	-3.56223	0.000367721	0.00454973		1110038F14Rik__chr15	-1.64293	0.00409894
ENSG00000243696	AC006254.1	7280.13	-3.13513	0.892381	-3.51322	0.000442706	0.00533339		ENSG00000163931	TKT	1938.5	3.22503	0.679453	4.74651	2.06952e-06	6.53021e-05		Ttc3__chr16	-1.64352	0.00781798
ENSG00000163931	TKT	1569.99	1.99892	0.71241	2.80586	0.0050183	0.0340936		ENSG00000056736	IL17RB	601.823	1.99649	0.666514	2.99541	0.00274072	0.0217923		Agap3__chr5	-1.6456	0.0131047
ENSG00000056736	IL17RB	455.513	1.65581	0.574907	2.88013	0.00397516	0.0284895		ENSG00000168374	ARF4	1239.57	2.36277	0.674989	3.50045	0.000464472	0.00549196		Gnl3__chr14	-1.65343	0.00534092
ENSG00000136068	FLNB	240.632	-2.36601	0.622485	-3.80091	0.000144169	0.00214339		ENSG00000136068	FLNB	296.531	-2.45836	0.71022	-3.4614	0.000537367	0.00611872		Atad2b__chr12	-1.65348	0.0312212
ENSG00000163687	DNASE1L3	332.533	-8.99275	1.14028	-7.88642	3.10967e-15	1.47283e-12		ENSG00000163687	DNASE1L3	122.836	-6.02897	1.52793	-3.94585	7.95189e-05	0.00132653		Ccdc174__chr6	-1.65542	0.028615
ENSG00000168306	ACOX2	275.284	-2.98717	0.747384	-3.99683	6.41955e-05	0.00112491		ENSG00000168306	ACOX2	325.285	-2.88295	0.951758	-3.02908	0.00245303	0.0202621		Sgta__chr10	-1.65556	0.0037771
ENSG00000163635	ATXN7	143.487	-4.49419	1.00139	-4.48793	7.19174e-06	0.000191054		ENSG00000168309	FAM107A	11.8184	-5.71423	2.30698	-2.47693	0.0132516	0.0709979		Ces1f__chr8	-1.65718	0.0441023
ENSG00000151276	MAGI1	73.4138	-2.42918	0.807291	-3.00905	0.00262066	0.0208458		ENSG00000144724	PTPRG	168.125	-2.04748	0.760348	-2.69282	0.00708511	0.0446074		Ier3ip1__chr18	-1.65804	2.66e-05
ENSG00000172340	SUCLG2	462.646	-1.91007	0.609146	-3.13564	0.00171478	0.0151524		ENSG00000163635	ATXN7	169.809	-4.68977	0.809119	-5.79614	6.78574e-09	5.12067e-07		Bace1__chr9	-1.65853	0.0374557
ENSG00000163412	EIF4E3	27.606	-5.02486	1.35322	-3.71325	0.000204616	0.0028648		ENSG00000163636	PSMD6	542.241	2.35148	0.750143	3.13471	0.00172025	0.0153746		Slc11a2__chr15	-1.65878	0.00759882
ENSG00000163605	PPP4R2	213.153	-1.71862	0.626974	-2.74113	0.00612282	0.0394627		ENSG00000151276	MAGI1	99.4839	-2.84762	0.974606	-2.92182	0.00347994	0.0261986		Fam210a__chr18	-1.66294	0.0026169
ENSG00000113805	CNTN3	21.6042	-6.27963	1.83112	-3.4294	0.000604927	0.00680837		ENSG00000144736	SHQ1	125.36	2.38046	0.809231	2.94163	0.00326491	0.0250153		Map3k5__chr10	-1.66553	0.0311425
ENSG00000175105	ZNF654	46.2039	-2.5538	1.03828	-2.45964	0.0139077	0.0716209		ENSG00000255423	EBLN2	17.8658	-4.02635	1.6817	-2.39421	0.0166563	0.0835845		Uspl1__chr5	-1.66768	0.0488128
ENSG00000269028	MTRNR2L12	51568.1	-3.38095	0.815113	-4.14783	3.35644e-05	0.00067279		ENSG00000185008	ROBO2	48.0833	-3.89687	1.44382	-2.699	0.00695483	0.0439256		Pdia3__chr2	-1.66771	0.0380795
ENSG00000080200	CRYBG3	80.4857	-2.37007	0.786266	-3.01433	0.00257545	0.0205651		ENSG00000184500	PROS1	1506.51	1.50879	0.605328	2.49252	0.012684	0.0687162		Zc3h11a__chr1	-1.67142	0.000258695
ENSG00000064225	ST3GAL6	142.268	-3.56188	0.73454	-4.84913	1.24005e-06	4.77027e-05		ENSG00000269028	MTRNR2L12	33309	-2.41566	0.864469	-2.79438	0.00519987	0.0353088		Serpinf1__chr11	-1.67167	0.00956365
ENSG00000036054	TBC1D23	130.706	-1.91163	0.69161	-2.76403	0.00570914	0.0374073		ENSG00000144820	ADGRG7	89.583	-5.08336	1.07934	-4.70969	2.48092e-06	7.46701e-05		Sf3b2__chr19	-1.67507	0.000549942
ENSG00000144820	ADGRG7	73.2085	-4.89099	0.992623	-4.92734	8.33571e-07	3.44591e-05		ENSG00000114354	TFG	823.552	1.85416	0.639525	2.89927	0.00374034	0.0276388		Plekha6__chr1	-1.67607	0.00322076
ENSG00000114391	RPL24	1629.7	1.74766	0.748746	2.33412	0.0195894	0.0924112		ENSG00000114391	RPL24	2166.3	1.99168	0.606367	3.28461	0.00102123	0.0102302		Fam173a__chr17	-1.68372	0.0021051
ENSG00000114439	BBX	111.267	-2.16611	0.721227	-3.00337	0.00267008	0.0211359		ENSG00000144802	NFKBIZ	218.968	-2.20107	0.836168	-2.63234	0.00847998	0.0513679		Ash1l__chr3	-1.69058	0.00960825
ENSG00000144824	PHLDB2	174.594	-3.42631	0.814689	-4.20567	2.60311e-05	0.000547611		ENSG00000196776	CD47	401.244	1.61503	0.668406	2.41625	0.0156813	0.0799795		Tarbp2__chr15	-1.69922	0.0497832
ENSG00000176542	USF3	134.448	-2.08086	0.646667	-3.21782	0.00129167	0.0121798		ENSG00000240891	PLCXD2	67.5513	-3.27733	1.08013	-3.0342	0.00241176	0.0199707		Map4k3__chr17	-1.70048	0.0119466
ENSG00000174255	ZNF80	16.5646	5.9769	1.65333	3.61507	0.00030027	0.00390705		ENSG00000144824	PHLDB2	158.599	-3.12005	0.918026	-3.39865	0.000677203	0.00734004		0610005C13Rik__chr7	-1.70482	0.0139801
ENSG00000181722	ZBTB20	133.914	-4.90708	0.834604	-5.87954	4.1142e-09	3.96181e-07		ENSG00000176542	USF3	224.836	-2.80029	0.722548	-3.87557	0.000106376	0.00169165		H2-Ke6__chr17	-1.70742	0.0183904
ENSG00000031081	ARHGAP31	14.8058	-4.86442	1.64617	-2.955	0.00312672	0.0236999		ENSG00000174255	ZNF80	26.6355	3.41559	1.41207	2.41885	0.0155696	0.0795788		Kdm5b__chr1	-1.70949	0.0346229
ENSG00000180353	HCLS1	55.585	-9.25668	1.72813	-5.35647	8.48623e-08	5.1155e-06		ENSG00000181722	ZBTB20	146.317	-4.75933	1.01028	-4.71092	2.46598e-06	7.45091e-05		Agfg2__chr5	-1.7106	0.00651662
ENSG00000173230	GOLGB1	358.616	-2.89245	0.689424	-4.19546	2.72316e-05	0.000567113		ENSG00000113845	TIMMDC1	442.842	2.56597	0.682148	3.76161	0.000168826	0.00244644		Erlec1__chr11	-1.71578	0.00424826
ENSG00000138496	PARP9	273.393	-3.35526	0.734329	-4.56916	4.89692e-06	0.000139959		ENSG00000144852	NR1I2	175.787	-2.16725	0.894673	-2.42239	0.0154187	0.079075		Foxp1__chr6	-1.71579	0.00670785
ENSG00000163840	DTX3L	238.63	-1.85688	0.734727	-2.52731	0.0114941	0.0622404		ENSG00000065518	NDUFB4	941.511	1.93535	0.708649	2.73105	0.00631331	0.0408247		Whsc1l1__chr8	-1.71699	0.00952247
ENSG00000173200	PARP15	104.641	-3.23638	1.10559	-2.9273	0.0034192	0.0254399		ENSG00000180353	HCLS1	55.3068	-9.09245	1.8638	-4.87845	1.06925e-06	3.71866e-05		Prorsd1__chr11	-1.72129	0.0173849
ENSG00000173193	PARP14	449.801	-3.03352	0.646643	-4.69119	2.71625e-06	8.71038e-05		ENSG00000173230	GOLGB1	349.989	-2.79251	0.745874	-3.74395	0.000181151	0.00258588		Bend7__chr2	-1.72175	0.0389647
ENSG00000173702	MUC13	194.757	10.3896	1.5425	6.73555	1.63314e-11	3.26176e-09		ENSG00000114013	CD86	25.5136	-6.68289	2.04392	-3.26964	0.00107686	0.0106607		Apoa5__chr9	-1.72177	0.0106798
ENSG00000173706	HEG1	75.4655	-3.14035	1.20694	-2.60191	0.00927069	0.0533612		ENSG00000138496	PARP9	297.026	-3.4333	0.700937	-4.89815	9.67419e-07	3.47013e-05		Nemf__chr12	-1.72345	0.000752683
ENSG00000163848	ZNF148	210.379	-2.83341	0.811503	-3.49156	0.000480205	0.00567381		ENSG00000173200	PARP15	129.184	-3.78789	0.880521	-4.30187	1.69362e-05	0.000368133		Csnk1g2__chr10	-1.72644	0.0264373
ENSG00000189366	ALG1L	57.6016	3.99376	1.04062	3.83787	0.000124107	0.00189441		ENSG00000173193	PARP14	506.956	-3.11656	0.648297	-4.8073	1.52979e-06	5.04609e-05		Gtf3c6__chr10	-1.73164	0.0329158
ENSG00000144908	ALDH1L1	1567.55	-3.92466	1.205	-3.25697	0.00112607	0.0109741		ENSG00000173702	MUC13	300.039	7.12379	1.09203	6.52347	6.87014e-11	8.20212e-09		Cfb__chr17	-1.73268	0.00650699
ENSG00000163884	KLF15	77.3998	-5.82232	1.14297	-5.09404	3.50518e-07	1.68421e-05		ENSG00000173706	HEG1	134.68	-5.0852	1.17586	-4.32466	1.52767e-05	0.000336709		Zfp639__chr3	-1.73737	0.0405052
ENSG00000070476	ZXDC	66.7133	-4.12191	1.05781	-3.89663	9.75402e-05	0.00156225		ENSG00000163848	ZNF148	188.868	-2.50434	0.743576	-3.36796	0.000757253	0.00803884		Il10rb__chr16	-1.73963	0.0134514
ENSG00000073111	MCM2	34.9259	3.39781	1.40844	2.41246	0.0158454	0.0786907		ENSG00000189366	ALG1L	97.9447	2.86651	1.13212	2.53198	0.011342	0.0632307		Chd6__chr2	-1.74034	0.00637057
ENSG00000175792	RUVBL1	290.342	2.6192	0.75715	3.45928	0.000541618	0.00624367		ENSG00000144908	ALDH1L1	767.284	-1.86583	0.769137	-2.42588	0.0152714	0.0786327		Brd2__chr17	-1.74051	0.000540121
ENSG00000169714	CNBP	3160.36	1.72148	0.671661	2.56301	0.0103768	0.0579248		ENSG00000163884	KLF15	47.3131	-5.03727	1.25556	-4.01197	6.02139e-05	0.00106325		Cir1__chr2	-1.74095	0.0154211
ENSG00000184897	H1FX	56.4445	-2.67184	0.928985	-2.87609	0.00402638	0.02872		ENSG00000070476	ZXDC	56.1708	-3.78517	1.07236	-3.52977	0.000415927	0.00504091		Herc2__chr7	-1.74108	0.0294689
ENSG00000138246	DNAJC13	106.34	-2.56611	0.957098	-2.68114	0.00733715	0.0450141		ENSG00000159650	UROC1	306.731	-4.37497	0.926008	-4.72455	2.30631e-06	7.13663e-05		Nfkbia__chr12	-1.74465	2.19e-05
ENSG00000081307	UBA5	193.46	-1.47169	0.627485	-2.34538	0.0190075	0.0903864		ENSG00000073111	MCM2	55.4232	2.51518	1.07466	2.34045	0.0192606	0.0930066		Evi5__chr5	-1.74671	3.05e-09
ENSG00000163785	RYK	64.9477	-2.47099	0.900894	-2.74282	0.00609149	0.0393095		ENSG00000114631	PODXL2	39.2297	6.14147	2.16559	2.83594	0.00456914	0.0321024		Cwf19l1__chr19	-1.75197	0.0490409
ENSG00000114019	AMOTL2	36.2547	-2.94667	1.11275	-2.6481	0.00809466	0.048268		ENSG00000074416	MGLL	738.42	-2.60815	0.791275	-3.29614	0.000980237	0.00988766		Apeh__chr9	-1.75264	0.0433421
ENSG00000118007	STAG1	94.4526	-2.93826	1.02074	-2.87856	0.0039949	0.0285939		ENSG00000175792	RUVBL1	455.785	1.90636	0.653139	2.91877	0.00351416	0.0263941		Abhd17c__chr7	-1.75436	5.67e-06
ENSG00000114113	RBP2	49.7548	5.69232	1.47866	3.84965	0.000118285	0.00182582		ENSG00000169714	CNBP	3797.09	2.88157	0.610696	4.71851	2.37583e-06	7.25354e-05		Fam193a__chr5	-1.75663	0.0156999
ENSG00000114120	SLC25A36	11.6588	-5.70011	2.03335	-2.80331	0.00505806	0.0342656		ENSG00000184897	H1FX	93.5528	-3.43541	0.900713	-3.8141	0.000136681	0.00206297		Uvssa__chr5	-1.75794	0.0299623
ENSG00000155893	PXYLP1	74.9308	3.09839	1.20876	2.56328	0.0103687	0.0579118		ENSG00000198585	NUDT16	189.054	-1.91118	0.761622	-2.50936	0.0120951	0.0664026		Dhrs3__chr4	-1.76051	0.0029205
ENSG00000069849	ATP1B3	652.511	4.65667	1.34052	3.47377	0.000513191	0.00598532		ENSG00000114686	MRPL3	466.267	2.59777	0.757904	3.42757	0.000609005	0.00675453		Zfp715__chr7	-1.76904	0.0321366
ENSG00000114127	XRN1	153.277	-2.78145	0.719246	-3.86717	0.000110107	0.00172636		ENSG00000240303	ACAD11	302.288	-1.58298	0.686341	-2.30641	0.0210876	0.0989906		Naa25__chr5	-1.76909	0.0116159
ENSG00000175054	ATR	78.3775	-2.08871	0.701983	-2.97545	0.00292562	0.0225557		ENSG00000274810	NPHP3-ACAD11	313.69	-1.60292	0.681141	-2.35329	0.018608	0.0908423		Vtn__chr11	-1.77187	0.00460332
ENSG00000181804	SLC9A9	33.0828	-8.50673	1.97273	-4.31217	1.61659e-05	0.000371681		ENSG00000144867	SRPRB	582.262	1.6685	0.672804	2.47993	0.013141	0.0705634		Terf2ip__chr8	-1.77217	0.0047156
ENSG00000152952	PLOD2	228.28	-2.29725	0.911075	-2.52148	0.0116864	0.063		ENSG00000154917	RAB6B	15.3394	5.44372	2.27339	2.39454	0.0166412	0.0835352		Tyw5__chr1	-1.77583	0.0154106
ENSG00000114698	PLSCR4	74.1125	-3.97184	1.05212	-3.7751	0.000159946	0.002334		ENSG00000129055	ANAPC13	466.786	2.15688	0.708332	3.04501	0.00232675	0.0193872		2310001H17Rik__chr6	-1.77714	0.0323797
ENSG00000163755	HPS3	2514.87	-3.30076	1.00765	-3.27571	0.00105397	0.0104308		ENSG00000114113	RBP2	80.9215	3.98596	1.18702	3.35795	0.000785218	0.00828076		Setd5__chr6	-1.77856	0.00626418
ENSG00000169908	TM4SF1	925.255	3.05515	1.01997	2.99534	0.00274143	0.021548		ENSG00000114125	RNF7	875.166	2.167	0.658388	3.29137	0.000997005	0.0100378		Ptrf__chr11	-1.77864	0.0412733
ENSG00000181788	SIAH2	117.068	-2.01576	0.856652	-2.35306	0.0186195	0.0889498		ENSG00000069849	ATP1B3	968.459	5.16036	0.640284	8.05949	7.66138e-16	2.45134e-13		Ddx42__chr11	-1.77899	0.00398553
ENSG00000181631	P2RY13	12.9949	-7.17326	2.01016	-3.5685	0.000359033	0.00455719		ENSG00000114127	XRN1	152.199	-2.70982	0.788875	-3.43504	0.00059246	0.0066004		Kif1c__chr11	-1.77946	0.00130795
ENSG00000152601	MBNL1	200.764	-2.76287	0.720008	-3.83728	0.000124406	0.00189722		ENSG00000163714	U2SURP	296.198	-1.8324	0.701329	-2.61275	0.00898161	0.0535159		Zfp410__chr12	-1.78137	0.0204868
ENSG00000169860	P2RY1	18.3213	-4.57792	1.92946	-2.37265	0.0176612	0.0859067		ENSG00000181744	C3orf58	107.496	-2.19493	0.902682	-2.43156	0.0150338	0.0777092		5033406O09Rik__chr12	-1.78156	0.0381947
ENSG00000114790	ARHGEF26	117.173	-2.70297	0.787277	-3.43332	0.000596239	0.00674427		ENSG00000114698	PLSCR4	41.1383	-3.26981	1.24058	-2.63571	0.00839621	0.050957		Fetub__chr16	-1.78347	0.0370762
ENSG00000174953	DHX36	183.158	-2.42909	0.832058	-2.91938	0.00350734	0.0259688		ENSG00000152977	ZIC1	20.4232	-6.39236	2.13669	-2.9917	0.00277425	0.022026		Txndc15__chr13	-1.78445	3.21e-05
ENSG00000163659	TIPARP	31.8287	-3.5253	1.03568	-3.40385	0.000664421	0.00725737		ENSG00000163754	GYG1	92.1599	2.51818	1.00048	2.51698	0.0118366	0.0653872		Mtf2__chr5	-1.78727	0.0295181
ENSG00000163660	CCNL1	187.02	-2.14479	0.76488	-2.80409	0.00504594	0.0342253		ENSG00000163755	HPS3	1715.86	-3.58651	0.985956	-3.63759	0.000275198	0.00364455		Fam126b__chr1	-1.78861	0.00107956
ENSG00000079257	LXN	23.3482	-3.64239	1.47316	-2.4725	0.0134171	0.0697884		ENSG00000047457	CP	3890.5	-4.85061	1.30183	-3.726	0.000194543	0.00274938		Nudcd3__chr11	-1.79059	0.00862433
ENSG00000169255	B3GALNT1	19.9774	4.27845	1.37145	3.11965	0.00181066	0.0157502		ENSG00000169908	TM4SF1	1275.03	3.05052	0.929479	3.28197	0.00103084	0.0103007		Ptpn21__chr12	-1.79109	0.0137183
ENSG00000121871	SLITRK3	20.4538	-5.78531	1.87337	-3.08818	0.00201387	0.0170153		ENSG00000070087	PFN2	155.473	3.48702	0.893202	3.90396	9.46322e-05	0.00154168		Dpp7__chr2	-1.795	0.0041639
ENSG00000008952	SEC62	593.089	-2.31675	0.67938	-3.41009	0.000649414	0.00716256		ENSG00000198843	SELENOT	802.486	2.35822	0.625517	3.77003	0.000163229	0.00237394		Zfp277__chr12	-1.79597	0.0384069
ENSG00000136603	SKIL	134.605	-3.02112	0.844117	-3.57903	0.000344866	0.00441515		ENSG00000181788	SIAH2	152.123	-2.44666	0.802611	-3.04838	0.00230081	0.0192311		Zfp191__chr18	-1.79729	0.0185151
ENSG00000163581	SLC2A2	1028.04	-2.98734	0.756655	-3.94809	7.8777e-05	0.00131113		ENSG00000152601	MBNL1	156.714	-2.22144	0.782298	-2.83964	0.00451644	0.031858		Sil1__chr18	-1.79785	0.00650169
ENSG00000186329	TMEM212	123.817	-3.35305	1.11135	-3.0171	0.00255205	0.0204472		ENSG00000174953	DHX36	154.265	-2.02525	0.773374	-2.61872	0.00882611	0.0529038		Ldlr__chr9	-1.79978	0.000240842
ENSG00000075420	FNDC3B	400.848	-1.73258	0.705952	-2.45424	0.0141182	0.0724818		ENSG00000163659	TIPARP	39.8962	-3.79363	1.20682	-3.1435	0.00166943	0.0150975		Wbp4__chr14	-1.79988	0.000197924
ENSG00000121858	TNFSF10	240.344	-3.51017	0.798897	-4.39377	1.11403e-05	0.000273995		ENSG00000163660	CCNL1	295.271	-2.75825	0.690254	-3.99599	6.4425e-05	0.00112396		Tysnd1__chr10	-1.80125	0.0231066
ENSG00000114346	ECT2	41.8791	2.53883	1.08223	2.34594	0.0189793	0.0903563		ENSG00000196542	SPTSSB	34.5354	5.16984	2.20392	2.34575	0.018989	0.0921009		Mphosph10__chr7	-1.80424	0.0154545
ENSG00000177694	NAALADL2	17.9346	-2.97497	1.25816	-2.36455	0.018052	0.087071		ENSG00000163536	SERPINI1	62.1041	3.9351	1.15322	3.41228	0.000644207	0.007074		Cml1__chr6	-1.80441	0.000922071
ENSG00000177565	TBL1XR1	372.215	-3.41497	0.62374	-5.47498	4.37557e-08	2.86695e-06		ENSG00000008952	SEC62	511.062	-2.00779	0.739349	-2.71562	0.00661522	0.042366		Phax__chr18	-1.80486	0.00462509
ENSG00000121879	PIK3CA	70.1197	-2.44648	0.888531	-2.7534	0.00589796	0.0382364		ENSG00000136603	SKIL	164.298	-3.29172	0.778067	-4.23063	2.33035e-05	0.000480424		Trappc5__chr8	-1.80648	0.00760214
ENSG00000136518	ACTL6A	115.563	1.81075	0.710499	2.54856	0.010817	0.059612		ENSG00000163577	EIF5A2	73.506	2.79468	1.02499	2.72654	0.00640014	0.0412196		1500012F01Rik__chr2	-1.80938	0.0012551
ENSG00000058063	ATP11B	65.5181	-2.30286	0.80397	-2.86436	0.00417851	0.0295634		ENSG00000163581	SLC2A2	1039.13	-3.08581	0.784336	-3.9343	8.34412e-05	0.00138188		D3Ertd751e__chr3	-1.81479	0.0458859
ENSG00000043093	DCUN1D1	273.117	-2.69557	0.789869	-3.41268	0.000643273	0.0071154		ENSG00000186329	TMEM212	109.181	-3.15591	0.89594	-3.52246	0.000427557	0.00513133		Socs7__chr11	-1.81761	0.0456028
ENSG00000161203	AP2M1	813.89	1.56741	0.671129	2.33548	0.0195185	0.0921866		ENSG00000121858	TNFSF10	351.74	-4.29466	0.759279	-5.65623	1.54738e-08	1.03146e-06		Rtfdc1__chr2	-1.81942	5.13e-06
ENSG00000214160	ALG3	1145.11	3.31707	0.762366	4.35103	1.35502e-05	0.000319973		ENSG00000177565	TBL1XR1	313.912	-3.03937	0.758386	-4.00769	6.13165e-05	0.00107796		Kansl1__chr11	-1.82063	0.0252871
ENSG00000175166	PSMD2	503.819	1.53637	0.651593	2.35787	0.0183802	0.0881111		ENSG00000136518	ACTL6A	155.153	2.03528	0.783232	2.59856	0.00936154	0.0552642		Dhx16__chr17	-1.82606	0.0417678
ENSG00000163882	POLR2H	460.508	1.8969	0.615755	3.08061	0.00206579	0.017339		ENSG00000058063	ATP11B	69.3193	-2.34539	0.988684	-2.37224	0.0176806	0.0875437		Heca__chr10	-1.82617	0.0436416
ENSG00000113790	EHHADH	763.39	-4.14827	0.784699	-5.28645	1.24715e-07	7.10446e-06		ENSG00000043093	DCUN1D1	213.145	-2.20677	0.752664	-2.93195	0.00336842	0.0255878		Abcc3__chr11	-1.82745	0.00335054
ENSG00000145192	AHSG	35887.5	2.43588	0.799472	3.04686	0.00231246	0.0189302		ENSG00000161203	AP2M1	1056.48	1.85263	0.626959	2.95495	0.00312716	0.0241799		Brd9__chr13	-1.83405	0.0274636
ENSG00000090512	FETUB	326.993	-4.9173	1.34809	-3.64761	0.00026469	0.00351812		ENSG00000214160	ALG3	1806.73	2.53709	0.63599	3.9892	6.62974e-05	0.00115292		Rad50__chr11	-1.83652	0.0122438
ENSG00000073849	ST6GAL1	3723.74	-2.98751	0.789402	-3.78452	0.000154005	0.00225326		ENSG00000163882	POLR2H	638.976	1.90644	0.630049	3.02586	0.00247931	0.0203928		H2afj__chr6	-1.8376	0.0014226
ENSG00000127241	MASP1	465.867	-2.86382	0.661929	-4.32647	1.51518e-05	0.000353264		ENSG00000113790	EHHADH	581.201	-3.02396	0.84291	-3.58753	0.00033383	0.00423255		Inca1__chr11	-1.83886	0.029703
ENSG00000136514	RTP4	37.6551	-4.60499	1.12203	-4.10416	4.05785e-05	0.000782174		ENSG00000090520	DNAJB11	655.005	1.97557	0.706214	2.79741	0.00515134	0.0350835		Golga4__chr9	-1.83888	0.00508791
ENSG00000157005	SST	274.008	11.8162	4.32816	2.73009	0.00633177	0.0403743		ENSG00000090512	FETUB	656.336	-6.01032	0.716309	-8.39068	4.83349e-17	1.8411e-14		Hexa__chr9	-1.83942	0.0490439
ENSG00000113916	BCL6	548.773	-1.98795	0.79851	-2.48958	0.0127894	0.0673691		ENSG00000113905	HRG	26525.3	-3.70148	1.17896	-3.13962	0.00169167	0.0152041		Zfp292__chr4	-1.83982	0.0233112
ENSG00000145012	LPP	529.137	-1.61466	0.6137	-2.63102	0.00851298	0.0499828		ENSG00000113889	KNG1	7266.99	-2.49143	1.06016	-2.35005	0.0187707	0.0913022		Rps19bp1__chr15	-1.85114	0.0430567
ENSG00000188001	TPRG1	43.5772	-5.19028	1.11226	-4.66645	3.06446e-06	9.60293e-05		ENSG00000163918	RFC4	95.8331	2.1147	0.894654	2.3637	0.0180933	0.0889816		Nlrp6__chr7	-1.8523	0.00190011
ENSG00000196083	IL1RAP	392.983	-4.26075	0.962121	-4.4285	9.48909e-06	0.00024129		ENSG00000073849	ST6GAL1	2054.61	-1.92257	0.63793	-3.01377	0.00258026	0.0209459		Rnf126__chr10	-1.85323	0.0393953
ENSG00000205835	GMNC	22.0309	-4.54556	1.90392	-2.38747	0.0169646	0.0831771		ENSG00000163923	RPL39L	342.286	2.32517	0.682346	3.40761	0.000655349	0.00715161		Mfhas1__chr8	-1.85576	0.00137393
ENSG00000198836	OPA1	133.525	-1.68177	0.69373	-2.42424	0.0153405	0.0772006		ENSG00000127241	MASP1	365.481	-2.33937	0.680182	-3.43932	0.000583175	0.00652192		Apoa2__chr1	-1.86093	7.21e-06
ENSG00000114315	HES1	84.6995	-2.59015	0.984206	-2.63171	0.0084956	0.0499364		ENSG00000145012	LPP	583.368	-1.62912	0.643936	-2.52993	0.0114084	0.0635106		Phf20l1__chr15	-1.86384	0.00188353
ENSG00000178772	CPN2	713.379	-3.42552	0.81189	-4.21919	2.45181e-05	0.000523758		ENSG00000196083	IL1RAP	290.659	-4.20278	0.874077	-4.80825	1.5226e-06	5.03277e-05		Adh6-ps1__chr3	-1.86946	0.00360478
ENSG00000133657	ATP13A3	383.145	-3.32661	0.792183	-4.19929	2.67752e-05	0.00056042		ENSG00000114315	HES1	121.152	-3.39102	0.942167	-3.59917	0.000319239	0.00409886		9930021J03Rik__chr19	-1.87093	0.00473096
ENSG00000072274	TFRC	132.075	-2.03286	0.829385	-2.45105	0.0142441	0.072923		ENSG00000178772	CPN2	487.304	-2.65353	0.657547	-4.0355	5.44854e-05	0.00097939		Txnip__chr3	-1.87287	0.0495406
ENSG00000213123	TCTEX1D2	13.7751	3.64898	1.3843	2.63598	0.0083894	0.0494739		ENSG00000133657	ATP13A3	350.984	-3.36042	0.837715	-4.01141	6.03582e-05	0.00106455		Pigu__chr2	-1.87601	0.0235295
ENSG00000174007	CEP19	23.1016	3.05365	1.20334	2.53764	0.0111602	0.0609162		ENSG00000072274	TFRC	209.057	-2.23448	0.855264	-2.61262	0.0089851	0.0535159		Slc25a47__chr12	-1.87852	0.0070892
ENSG00000180370	PAK2	420.506	-1.86435	0.690628	-2.6995	0.00694441	0.0431799		ENSG00000114503	NCBP2	381.398	2.56038	0.795458	3.21875	0.00128751	0.0122605		4932438A13Rik__chr3	-1.88037	0.00787283
ENSG00000075711	DLG1	78.4339	-1.85235	0.801981	-2.30972	0.0209038	0.0964706		ENSG00000075711	DLG1	104.376	-2.14182	0.857586	-2.49749	0.0125075	0.068034		Gm6484__chr9	-1.88108	0.0235684
ENSG00000161267	BDH1	757.03	-3.51581	0.597937	-5.8799	4.10526e-09	3.96181e-07		ENSG00000161267	BDH1	664.601	-3.09893	0.682042	-4.54361	5.52984e-06	0.000143848		Ubn2__chr6	-1.88443	0.00569494
ENSG00000272602	ZNF595	114.226	2.39458	0.717528	3.33727	0.000846066	0.00878224		ENSG00000182899	RPL35A	2605.75	1.6792	0.601285	2.79268	0.00522729	0.0353599		Apoc1__chr7	-1.88521	1.51e-05
ENSG00000127415	IDUA	70.0808	2.96535	0.861352	3.44266	0.000576013	0.00655358		ENSG00000272602	ZNF595	152.558	3.15197	0.80526	3.91422	9.06965e-05	0.00148664		Rbm25__chr12	-1.88534	0.000757818
ENSG00000123933	MXD4	122.112	-1.85651	0.796794	-2.32998	0.0198072	0.0931473		ENSG00000185619	PCGF3	153.703	-1.96487	0.771452	-2.54697	0.0108662	0.0612748		A230050P20Rik__chr9	-1.88536	3.14e-05
ENSG00000125386	FAM193A	62.302	-2.36452	0.838805	-2.81892	0.00481855	0.0329662		ENSG00000163950	SLBP	269.435	2.32879	0.703064	3.31235	0.000925159	0.00943628		Abcb6__chr1	-1.88595	0.00145963
ENSG00000109736	MFSD10	282.152	3.74026	0.837525	4.46585	7.97512e-06	0.000208523		ENSG00000068078	FGFR3	116.031	-2.01024	0.858624	-2.34123	0.0192203	0.0928682		Slmap__chr14	-1.88623	0.0245957
ENSG00000109758	HGFAC	241.129	-3.41326	1.30119	-2.62317	0.00871155	0.0509028		ENSG00000243449	C4orf48	87.2716	2.41188	0.934789	2.58013	0.00987617	0.0574542		mtNd4__chrM	-1.8878	0.000141317
ENSG00000163956	LRPAP1	948.418	2.66426	0.641157	4.15539	3.24727e-05	0.000656462		ENSG00000123933	MXD4	194.575	-2.45789	0.740837	-3.31772	0.000907562	0.0093012		Zmynd8__chr2	-1.89198	0.00246519
ENSG00000163132	MSX1	17.0685	4.33388	1.52219	2.84714	0.00441137	0.0308684		ENSG00000125386	FAM193A	86.156	-2.40136	0.945511	-2.53974	0.0110934	0.0622242		Deaf1__chr7	-1.89236	0.0157636
ENSG00000109501	WFS1	413.174	4.27532	0.723105	5.91244	3.37075e-09	3.34593e-07		ENSG00000087266	SH3BP2	245.64	-2.25872	0.749478	-3.01373	0.0025806	0.0209459		Ehmt1__chr2	-1.89248	0.0125165
ENSG00000178597	PSAPL1	80.0533	7.70767	3.0962	2.48939	0.0127961	0.0673741		ENSG00000109736	MFSD10	447.55	2.40549	0.688187	3.4954	0.000473358	0.00556822		Zkscan1__chr5	-1.89405	0.00153566
ENSG00000178163	ZNF518B	34.9081	-4.60143	1.56874	-2.93321	0.0033548	0.0250846		ENSG00000197386	HTT	198.275	-1.92479	0.736397	-2.6138	0.00895422	0.0534713		Lrp5__chr19	-1.89533	0.00849536
ENSG00000137449	CPEB2	34.3653	-3.1271	0.996621	-3.13771	0.00170276	0.0150542		ENSG00000109758	HGFAC	1098.55	-7.20974	1.2964	-5.56136	2.67675e-08	1.64071e-06		Zranb2__chr3	-1.89617	0.000103443
ENSG00000169762	TAPT1	124.012	-1.97542	0.717199	-2.75436	0.00588078	0.03814		ENSG00000163956	LRPAP1	1373.88	2.5036	0.623132	4.01777	5.87516e-05	0.00104087		Nufip2__chr11	-1.89718	7.53e-06
ENSG00000169744	LDB2	165.98	-9.3778	1.52044	-6.16782	6.92377e-10	8.43936e-08		ENSG00000163132	MSX1	25.457	5.6232	1.74417	3.22399	0.00126418	0.0121031		Ccdc55__chr11	-1.89996	0.00983055
ENSG00000152990	ADGRA3	150.952	-2.84129	0.977831	-2.90571	0.00366423	0.026735		ENSG00000109501	WFS1	610.051	4.66328	0.86209	5.40927	6.32814e-08	3.47896e-06		Tcf25__chr8	-1.90031	8.37e-05
ENSG00000109819	PPARGC1A	105.795	-4.77747	1.52635	-3.13	0.00174806	0.0153425		ENSG00000179010	MRFAP1	1875.23	1.93111	0.64454	2.99611	0.00273449	0.0217536		BC004004__chr17	-1.90149	5.68e-05
ENSG00000181982	CCDC149	27.127	-3.30527	1.2103	-2.73094	0.00631531	0.0402959		ENSG00000163993	S100P	85.5261	5.0798	1.1517	4.41069	1.03041e-05	0.00024242		Slc27a4__chr2	-1.9044	0.0422769
ENSG00000109618	SEPSECS	360.328	-2.24647	0.755032	-2.97532	0.00292679	0.0225557		ENSG00000071127	WDR1	979.104	1.65299	0.616798	2.67995	0.00736333	0.0460331		Rabl6__chr2	-1.91357	0.0449841
ENSG00000091490	SEL1L3	96.5026	1.89589	0.732941	2.58669	0.00969037	0.0551071		ENSG00000038219	BOD1L1	152.43	-2.05172	0.779023	-2.6337	0.0084459	0.0512002		Pigr__chr1	-1.91434	0.0280223
ENSG00000047365	ARAP2	21.4918	-2.7327	1.11761	-2.44512	0.0144803	0.073881		ENSG00000169744	LDB2	23.9666	-5.68375	2.0759	-2.73796	0.0061821	0.0402038		Gm4788__chr1	-1.9152	0.000699328
ENSG00000109787	KLF3	203.704	-1.78025	0.775337	-2.2961	0.0216701	0.0990716		ENSG00000109819	PPARGC1A	503.715	-8.07928	1.38407	-5.83733	5.30434e-09	4.10382e-07		Hsp90ab1__chr17	-1.91542	0.000257017
ENSG00000174125	TLR1	33.2045	-5.03934	1.18621	-4.24826	2.15441e-05	0.000472864		ENSG00000250317	SMIM20	190.143	2.80493	0.832957	3.36743	0.000758712	0.00804898		Riok1__chr13	-1.91674	0.0408739
ENSG00000035928	RFC1	280.651	-1.44658	0.63021	-2.2954	0.0217103	0.0991711		ENSG00000047365	ARAP2	31.2875	-3.33197	1.31959	-2.52501	0.0115695	0.0642447		Cadm1__chr9	-1.91695	0.00244225
ENSG00000134962	KLB	233.065	-2.71975	0.769376	-3.53501	0.000407759	0.00502559		ENSG00000035928	RFC1	366.937	-1.72783	0.674347	-2.56223	0.0104003	0.0594226		Zkscan3__chr13	-1.92076	6.94e-06
ENSG00000163683	SMIM14	1131.92	-2.42056	0.619661	-3.90626	9.37357e-05	0.00151153		ENSG00000134962	KLB	254.913	-2.77199	0.719229	-3.85411	0.000116151	0.00181088		S100a13__chr3	-1.92714	0.0457005
ENSG00000163694	RBM47	241.631	-2.05768	0.677162	-3.03868	0.0023762	0.0192773		ENSG00000109814	UGDH	954.129	2.10689	0.762222	2.76415	0.00570714	0.0376598		Phldb2__chr16	-1.92812	0.000249285
ENSG00000163697	APBB2	97.9857	-1.69814	0.702483	-2.41733	0.0156346	0.078094		ENSG00000151834	GABRA2	36.1304	5.39824	1.62229	3.32754	0.000876169	0.00906073		Arhgap5__chr12	-1.92925	0.0239709
ENSG00000124406	ATP8A1	10.6227	-3.5734	1.50018	-2.38197	0.0172202	0.0841565		ENSG00000170516	COX7B2	147.969	5.13899	1.08892	4.71934	2.36608e-06	7.25144e-05		Tnpo1__chr13	-1.93005	0.00625008
ENSG00000151834	GABRA2	25.0536	4.33964	1.57449	2.75622	0.00584732	0.038042		ENSG00000198515	CNGA1	85.0488	-4.6095	0.988327	-4.66394	3.10217e-06	9.007e-05		Tfe3__chrX	-1.93099	0.0353317
ENSG00000170516	COX7B2	91.7347	10.2382	3.84805	2.6606	0.00780006	0.0469675		ENSG00000163069	SGCB	86.2024	2.64519	0.924677	2.86066	0.0042276	0.0303199		Brd3__chr2	-1.93113	0.000213033
ENSG00000170448	NFXL1	150.825	2.7981	1.1611	2.40986	0.0159584	0.0791447		ENSG00000226887	ERVMER34-1	34.4622	2.94214	1.27178	2.31341	0.0207002	0.0977546		Btbd9__chr17	-1.93238	0.00620942
ENSG00000198515	CNGA1	49.3893	-3.82018	1.02601	-3.72335	0.000196595	0.00277123		ENSG00000128052	KDR	15.4667	-6.02459	2.50511	-2.40492	0.0161758	0.0818423		Prdm2__chr4	-1.93284	0.00633259
ENSG00000075539	FRYL	98.7573	-3.00455	1.03728	-2.89656	0.00377283	0.0273588		ENSG00000128039	SRD5A3	274.531	2.29222	0.701853	3.26596	0.00109094	0.0107734		Cdc14b__chr13	-1.94017	0.000460462
ENSG00000226887	ERVMER34-1	22.8857	3.24579	1.15716	2.80496	0.00503229	0.0341606		ENSG00000134852	CLOCK	89.3655	-2.73097	0.892468	-3.06002	0.00221319	0.0186075		Ldlrap1__chr4	-1.94056	0.0249142
ENSG00000128052	KDR	97.1302	-10.0623	1.69672	-5.93047	3.02073e-09	3.0725e-07		ENSG00000128050	PAICS	829.145	1.70769	0.66556	2.56579	0.0102941	0.0590267		Clasrp__chr7	-1.94415	0.0393298
ENSG00000128039	SRD5A3	178.296	3.02349	0.992627	3.04595	0.00231947	0.0189726		ENSG00000163453	IGFBP7	312.356	-3.16414	1.00681	-3.14274	0.00167374	0.0151191		Oaz2__chr9	-1.94422	0.00737186
ENSG00000134852	CLOCK	71.7274	-2.47176	0.9527	-2.59448	0.00947336	0.0543203		ENSG00000109181	UGT2B10	6624.68	3.41949	0.705762	4.8451	1.26548e-06	4.30747e-05		Ttc1__chr11	-1.94633	0.0352227
ENSG00000084093	REST	121.52	-1.56201	0.645472	-2.41995	0.0155227	0.0777165		ENSG00000135220	UGT2A3	170.947	2.29274	0.760634	3.01424	0.00257621	0.0209422		Morf4l1__chr9	-1.95404	0.0241329
ENSG00000163453	IGFBP7	1820.07	-6.12873	1.10974	-5.52265	3.33924e-08	2.32258e-06		ENSG00000213759	UGT2B11	10409.7	6.1306	0.595076	10.3022	6.88678e-25	5.79867e-22		Rnf41__chr10	-1.95699	0.0378878
ENSG00000109163	GNRHR	8.65574	-6.58416	2.66816	-2.46768	0.0135992	0.0704921		ENSG00000171234	UGT2B7	5277.29	2.836	0.92943	3.05133	0.0022783	0.0190729		Bod1l__chr5	-1.9576	0.00562007
ENSG00000196620	UGT2B15	897.075	-2.82283	0.584199	-4.83198	1.35184e-06	5.07003e-05		ENSG00000135226	UGT2B28	8401.89	6.04948	0.665096	9.09565	9.40233e-20	4.85221e-17		Tor1b__chr2	-1.9587	0.00185735
ENSG00000109181	UGT2B10	4261.56	3.33655	0.792907	4.20799	2.57649e-05	0.000544777		ENSG00000156096	UGT2B4	7965.06	2.69637	0.591785	4.55634	5.20534e-06	0.000137191		Kif1b__chr4	-1.95922	0.00262411
ENSG00000213759	UGT2B11	6654.15	6.9331	0.84277	8.22656	1.92667e-16	1.10132e-13		ENSG00000173610	UGT2A1	31.5765	4.37999	1.40944	3.10761	0.00188608	0.0164697		Tigd2__chr6	-1.95993	0.00740701
ENSG00000171234	UGT2B7	3891.14	1.49056	0.597635	2.4941	0.0126277	0.0667715		ENSG00000271271	UGT2A2	24.451	5.99288	1.80133	3.32692	0.000878129	0.00907513		Ccdc82__chr9	-1.96259	0.00563827
ENSG00000135226	UGT2B28	5380.92	6.68239	1.06433	6.27851	3.41823e-10	4.45798e-08		ENSG00000126550	HTN1	25.3903	-4.80842	1.55487	-3.09249	0.00198485	0.0171456		Adora1__chr1	-1.96642	0.0422597
ENSG00000173597	SULT1B1	553.326	-2.20443	0.710479	-3.10274	0.0019174	0.0164263		ENSG00000132465	JCHAIN	166.755	-8.45729	1.3195	-6.40949	1.4601e-10	1.61304e-08		Zfp467__chr6	-1.96675	0.021979
ENSG00000126550	HTN1	24.7601	-4.84492	1.47652	-3.28131	0.00103327	0.0102689		ENSG00000132463	GRSF1	551.793	2.03064	0.650486	3.12173	0.00179792	0.0159003		Golgb1__chr16	-1.96685	0.00659138
ENSG00000109205	ODAM	188.826	11.2794	4.32823	2.60599	0.00916079	0.0527941		ENSG00000132466	ANKRD17	201.584	-2.12168	0.739056	-2.87079	0.00409444	0.0295191		Ino80__chr2	-1.96896	0.0194634
ENSG00000132465	JCHAIN	98.2497	-7.64561	1.60868	-4.75272	2.00702e-06	6.9458e-05		ENSG00000081051	AFP	20527.6	4.28259	0.606494	7.06123	1.65039e-12	2.90143e-10		Onecut2__chr18	-1.96923	0.000868225
ENSG00000080493	SLC4A4	96.6026	-3.58942	1.14505	-3.13471	0.00172022	0.0151762		ENSG00000079557	AFM	992.826	-3.58726	0.622319	-5.76434	8.19756e-09	6.04353e-07		Cwf19l2__chr9	-1.97051	0.00124229
ENSG00000132466	ANKRD17	236.495	-2.52255	0.623866	-4.04342	5.26771e-05	0.000964894		ENSG00000163735	CXCL5	74.0348	6.35904	1.45349	4.37503	1.21418e-05	0.000281106		Fam63b__chr9	-1.97542	0.00388975
ENSG00000081051	AFP	12708.9	10.4028	1.20368	8.64252	5.49877e-18	4.55765e-15		ENSG00000081041	CXCL2	671.231	-4.12514	1.38586	-2.97659	0.00291469	0.0228687		Ncoa6__chr2	-1.97918	0.00770305
ENSG00000079557	AFM	445.396	-2.38397	0.77373	-3.08114	0.00206208	0.0173167		ENSG00000109321	AREG	167.552	4.45124	0.958459	4.64416	3.41458e-06	9.75471e-05		Wasl__chr6	-1.9827	4.13e-05
ENSG00000124875	CXCL6	78.3585	-7.19392	1.54786	-4.64766	3.35729e-06	0.000103062		ENSG00000169116	PARM1	41.5013	3.9314	1.48112	2.65434	0.0079463	0.0489506		Efnb1__chrX	-1.98288	0.00200769
ENSG00000163736	PPBP	17.5433	-3.92085	1.54301	-2.54104	0.0110524	0.0604672		ENSG00000138755	CXCL9	39.9482	-8.55757	1.93648	-4.41914	9.90957e-06	0.000235213		Prkca__chr11	-1.98402	0.0145519
ENSG00000163735	CXCL5	55.293	3.41787	1.35319	2.52579	0.011544	0.0624149		ENSG00000169245	CXCL10	43.6006	-4.66092	1.49899	-3.10938	0.00187481	0.0163987		R3hdm1__chr1	-1.98576	0.0133155
ENSG00000109321	AREG	103.382	9.47727	1.47474	6.4264	1.30663e-10	1.96909e-08		ENSG00000169248	CXCL11	10.4852	-6.74993	2.69287	-2.5066	0.01219	0.06682		Lsm3__chr6	-1.98659	0.0359572
ENSG00000169116	PARM1	24.2699	8.31208	1.96951	4.22037	2.43899e-05	0.000521692		ENSG00000272414	FAM47E-STBD1	213.227	-2.44677	0.76007	-3.21914	0.00128578	0.0122512		Efna1__chr3	-1.98872	0.00108573
ENSG00000138768	USO1	249.906	-2.11393	0.801204	-2.63844	0.00832874	0.0492388		ENSG00000118804	STBD1	212.284	-2.76583	0.794095	-3.48299	0.000495843	0.00575653		Rabggta__chr14	-1.99086	0.0419688
ENSG00000138744	NAAA	141.796	-2.16493	0.745878	-2.90253	0.00370159	0.026972		ENSG00000138767	CNOT6L	217.278	-1.83545	0.777682	-2.36016	0.0182671	0.089616		Zfhx3__chr8	-1.99191	0.0169978
ENSG00000272414	FAM47E-STBD1	429.127	-3.60412	0.723719	-4.98	6.35847e-07	2.75207e-05		ENSG00000156269	NAA11	13.9244	7.27644	2.46783	2.94852	0.00319302	0.0245587		Proc__chr18	-1.99257	0.00493856
ENSG00000118804	STBD1	449.365	-3.89542	0.750306	-5.19178	2.08295e-07	1.08241e-05		ENSG00000145293	ENOPH1	147.759	3.05507	0.917657	3.3292	0.000870955	0.00901847		Bdp1__chr13	-1.99286	0.0350731
ENSG00000138771	SHROOM3	63.7593	-3.42459	0.982887	-3.48422	0.000493582	0.0057988		ENSG00000172493	AFF1	172.743	-3.72998	0.901445	-4.13777	3.50691e-05	0.00067758		Akap8__chr17	-1.99371	0.000988062
ENSG00000138764	CCNG2	31.6836	-2.33901	0.957274	-2.4434	0.0145495	0.0740745		ENSG00000198189	HSD17B11	888.719	3.03542	0.621062	4.88747	1.02139e-06	3.59127e-05		Tcirg1__chr19	-1.99501	0.0255257
ENSG00000156269	NAA11	9.04751	6.89396	2.12491	3.24436	0.00117717	0.0113387		ENSG00000145337	PYURF	760.745	2.04032	0.653006	3.12451	0.00178102	0.0157942		Klhl12__chr1	-1.99549	0.0113701
ENSG00000138670	RASGEF1B	230.602	-2.76917	0.811776	-3.41125	0.00064665	0.00714158		ENSG00000138641	HERC3	780.24	1.86774	0.650189	2.87261	0.00407091	0.0294157		Ubn1__chr16	-1.99835	0.00202342
ENSG00000163625	WDFY3	73.2657	-4.10591	0.907445	-4.52469	6.04827e-06	0.000165927		ENSG00000255072	PIGY	233.767	2.66961	0.754224	3.53955	0.000400812	0.00489619		Ttc14__chr3	-2.00033	0.000530112
ENSG00000109339	MAPK10	14.2199	-7.29692	2.0523	-3.55548	0.00037729	0.00474532		ENSG00000138640	FAM13A	76.0093	-2.5205	1.08327	-2.32675	0.0199788	0.0954749		Nop14__chr5	-2.00274	0.0375192
ENSG00000172493	AFF1	348.98	-4.3916	0.97737	-4.49328	7.01349e-06	0.00018752		ENSG00000163110	PDLIM5	461.335	-1.7964	0.664195	-2.70462	0.0068382	0.0434117		Yeats2__chr16	-2.00326	0.0157133
ENSG00000170509	HSD17B13	252.232	-3.02427	0.853919	-3.54163	0.000397657	0.00493041		ENSG00000196616	ADH1B	5352.19	-3.75164	1.18	-3.17936	0.001476	0.0136728		Esco1__chr18	-2.00433	0.0260156
ENSG00000118762	PKD2	120.172	-3.56969	0.799004	-4.46768	7.90737e-06	0.000207078		ENSG00000164032	H2AFZ	2485.69	3.91126	0.87293	4.48061	7.44288e-06	0.00018634		Rbm28__chr6	-2.00599	0.0041286
ENSG00000138646	HERC5	33.592	-3.7325	1.18735	-3.14357	0.00166902	0.0148566		ENSG00000168769	TET2	36.2683	-4.89555	1.5425	-3.17378	0.00150469	0.0138664		Zfp263__chr16	-2.00714	0.00763702
ENSG00000177432	NAP1L5	21.7097	-4.91638	1.39088	-3.53474	0.000408177	0.00502701		ENSG00000138777	PPA2	445.526	1.83377	0.674107	2.72029	0.00652238	0.0418888		Scrn3__chr2	-2.00752	0.000169585
ENSG00000138640	FAM13A	90.1522	-3.28056	1.00701	-3.25774	0.00112305	0.0109704		ENSG00000168743	NPNT	91.9949	-3.98068	1.01674	-3.91515	9.03474e-05	0.00148244		Gab1__chr8	-2.00976	0.0481037
ENSG00000138722	MMRN1	20.3629	-6.18126	1.83559	-3.36745	0.000758678	0.0080671		ENSG00000138801	PAPSS1	56.5935	3.12761	1.12944	2.76916	0.00562007	0.0372817		Rlf__chr4	-2.01003	0.0462075
ENSG00000163110	PDLIM5	490.607	-2.13361	0.67682	-3.15241	0.0016193	0.0144629		ENSG00000164023	SGMS2	30.8525	-3.60997	1.34012	-2.69376	0.0070651	0.044499		Kdm5a__chr6	-2.01269	0.000907094
ENSG00000168785	TSPAN5	161.075	3.59697	1.28898	2.79055	0.00526185	0.0352998		ENSG00000198856	OSTC	1133.85	1.74598	0.695014	2.51216	0.0119996	0.0660825		Gm6525__chr3	-2.01407	0.0323703
ENSG00000198099	ADH4	2956.83	-3.56622	1.07006	-3.33273	0.000859983	0.00890674		ENSG00000138802	SEC24B	188.458	-1.96553	0.812527	-2.41904	0.0155616	0.0795638		Bicd2__chr13	-2.01661	0.00889226
ENSG00000187758	ADH1A	2776.18	-1.85749	0.785528	-2.36464	0.0180475	0.087071		ENSG00000205403	CFI	809.067	-3.20514	0.675171	-4.74716	2.06297e-06	6.52241e-05		Brms1__chr19	-2.02003	0.032099
ENSG00000196616	ADH1B	10529.7	-4.42839	1.06371	-4.16316	3.13869e-05	0.000636842		ENSG00000174749	C4orf32	373.21	-2.01666	0.666182	-3.02719	0.00246837	0.0203446		Sipa1__chr19	-2.02059	0.0339784
ENSG00000248144	ADH1C	1895.2	-4.63227	1.05105	-4.4073	1.04666e-05	0.00026091		ENSG00000174607	UGT8	46.0623	-2.81056	1.10717	-2.53851	0.0111324	0.0623587		Gltscr2__chr7	-2.02063	0.00121156
ENSG00000164035	EMCN	45.6443	-5.04592	1.12234	-4.49589	6.92795e-06	0.000185833		ENSG00000164109	MAD2L1	130.148	3.41579	1.0324	3.30861	0.000937613	0.00953587		Tmem160__chr7	-2.02076	0.00991105
ENSG00000164038	SLC9B2	148.804	-2.08938	0.839878	-2.48772	0.0128565	0.0675556		ENSG00000164111	ANXA5	2755.83	2.8617	0.602558	4.74925	2.04173e-06	6.49375e-05		Arhgap42__chr9	-2.0216	0.0242763
ENSG00000168769	TET2	54.5957	-4.92176	1.19279	-4.12625	3.68734e-05	0.000724231		ENSG00000145386	CCNA2	105.89	2.29885	0.90129	2.55062	0.010753	0.0607868		Trim41__chr11	-2.02473	0.0124203
ENSG00000138795	LEF1	10.8458	4.89499	2.03142	2.40964	0.0159682	0.0791447		ENSG00000138688	KIAA1109	281.209	-3.88243	0.725386	-5.35222	8.68828e-08	4.53044e-06		Hmg20a__chr9	-2.02509	0.0172271
ENSG00000164089	ETNPPL	151.376	-2.34779	0.880884	-2.66527	0.00769275	0.0465581		ENSG00000138709	LARP1B	113.226	-2.91085	0.851819	-3.41722	0.000632651	0.0069657		Zfp609__chr9	-2.02724	0.0197363
ENSG00000138802	SEC24B	327.492	-3.22557	0.808193	-3.99109	6.57703e-05	0.00114284		ENSG00000164040	PGRMC2	431.741	-2.68684	0.711425	-3.7767	0.00015892	0.00233676		Ikbkb__chr8	-2.0274	0.000255558
ENSG00000205403	CFI	1233.27	-4.11368	0.78527	-5.23856	1.61838e-07	8.84995e-06		ENSG00000151012	SLC7A11	96.1654	3.54167	0.889173	3.98311	6.80195e-05	0.00117438		Os9__chr10	-2.02886	0.000698121
ENSG00000170522	ELOVL6	248.5	-2.30348	1.00436	-2.29348	0.0218203	0.0994586		ENSG00000196782	MAML3	46.5055	-2.84031	1.10197	-2.57747	0.00995258	0.0577936		Slc9a8__chr2	-2.03107	0.0488615
ENSG00000138792	ENPEP	212.866	-4.43604	0.798683	-5.55419	2.78895e-08	1.98423e-06		ENSG00000153130	SCOC	425.265	2.04355	0.6603	3.09488	0.00196892	0.0170423		Cyp2d10__chr15	-2.03555	0.000604387
ENSG00000174749	C4orf32	452.815	-2.4767	0.848722	-2.91816	0.00352108	0.0260515		ENSG00000164164	OTUD4	158.005	-2.13828	0.769954	-2.77715	0.00548378	0.0366303		Kansl3__chr1	-2.03815	0.000988399
ENSG00000174720	LARP7	144.736	-1.91708	0.808911	-2.36996	0.0177902	0.0863314		ENSG00000151611	MMAA	74.42	-2.40717	0.943251	-2.55199	0.010711	0.0606566		Zfp617__chr8	-2.04069	0.00145717
ENSG00000145349	CAMK2D	198.994	-1.99234	0.719746	-2.76811	0.00563827	0.0370161		ENSG00000071205	ARHGAP10	15.2723	-7.2945	2.41701	-3.01798	0.00254465	0.0207489		Pura__chr18	-2.05064	0.0346234
ENSG00000174607	UGT8	51.93	-3.1269	1.18387	-2.64126	0.00825986	0.0489363		ENSG00000151623	NR3C2	16.186	-6.67031	2.41652	-2.7603	0.00577485	0.0380037		Tmem205__chr9	-2.05096	3.45e-05
ENSG00000150961	SEC24D	185.311	-2.22079	0.756109	-2.93712	0.00331272	0.0248372		ENSG00000198589	LRBA	80.9324	-2.16853	0.917025	-2.36474	0.0180426	0.0887865		2810008D09Rik__chr11	-2.05154	0.0455111
ENSG00000172403	SYNPO2	73.032	-3.0633	1.01591	-3.01532	0.00256709	0.020528		ENSG00000145425	RPS3A	6400.36	2.36585	0.584603	4.04694	5.18913e-05	0.000941222		Vps39__chr2	-2.0525	0.0163957
ENSG00000145390	USP53	64.1915	-2.69562	0.841397	-3.20374	0.00135654	0.0126404		ENSG00000109686	SH3D19	2380.5	2.15695	0.602827	3.57806	0.000346153	0.00433207		2810474O19Rik__chr6	-2.05757	0.000926073
ENSG00000164109	MAD2L1	87.8449	3.39691	0.919667	3.69363	0.000221077	0.00304385		ENSG00000109670	FBXW7	69.2036	-2.78499	0.965435	-2.8847	0.00391784	0.0285551		Tap1__chr17	-2.05794	0.0343868
ENSG00000145386	CCNA2	64.2652	3.3563	0.96057	3.49407	0.00047571	0.00563274		ENSG00000171566	PLRG1	171.603	1.80901	0.786096	2.30125	0.0213773	0.0999982		Ppil2__chr16	-2.05799	0.00328395
ENSG00000138688	KIAA1109	284.713	-3.89674	0.744887	-5.23131	1.68311e-07	9.14516e-06		ENSG00000256043	CTSO	121.302	-2.30623	0.902452	-2.55551	0.0106031	0.0601949		Slc23a2__chr2	-2.05898	0.00927833
ENSG00000138685	FGF2	82.2713	-2.48402	0.742625	-3.34492	0.000823065	0.00862995		ENSG00000109738	GLRB	11.3005	6.89253	2.64188	2.60895	0.0090821	0.0540333		Tjp2__chr19	-2.061	0.00788026
ENSG00000151458	ANKRD50	55.7357	-2.75954	1.0907	-2.53006	0.0114044	0.0618419		ENSG00000052795	FNIP2	101.218	-4.2763	1.05002	-4.07258	4.64957e-05	0.000861718		Wbscr16__chr5	-2.06148	0.0371045
ENSG00000196159	FAT4	168.673	-9.36775	1.59453	-5.87494	4.22996e-09	4.02692e-07		ENSG00000109756	RAPGEF2	54.7059	-4.04667	1.17261	-3.451	0.000558515	0.00630121		Gpatch1__chr7	-2.07036	0.0425702
ENSG00000138709	LARP1B	169.651	-3.66456	0.666145	-5.50115	3.77314e-08	2.57396e-06		ENSG00000145416	2001-03-01	11.9012	-5.71614	2.31404	-2.4702	0.0135039	0.0720596		Ubr4__chr4	-2.07036	0.00046731
ENSG00000164040	PGRMC2	383.851	-2.36671	0.848034	-2.79082	0.0052575	0.0352848		ENSG00000052802	MSMO1	4049.19	1.50248	0.595139	2.52459	0.0115833	0.0642988		Nub1__chr5	-2.07222	0.00588001
ENSG00000189184	PCDH18	32.8701	-8.49818	2.12212	-4.00456	6.21319e-05	0.00110038		ENSG00000109511	ANXA10	56.4425	-4.09818	1.41255	-2.90127	0.00371649	0.0275007		Chd8__chr14	-2.07267	0.0206035
ENSG00000151012	SLC7A11	66.6207	3.19411	1.14401	2.79204	0.00523776	0.0351951		ENSG00000137628	DDX60	44.8599	-3.54494	1.43206	-2.47542	0.0133079	0.0712039		Gigyf1__chr5	-2.07421	0.011465
ENSG00000145391	SETD7	195.582	-2.18032	0.654648	-3.33052	0.000866831	0.00894735		ENSG00000164120	HPGD	604.121	-3.08349	1.14201	-2.70005	0.00693288	0.0438388		Cyth1__chr11	-2.07471	0.0311945
ENSG00000196782	MAML3	62.3541	-3.40552	1.05191	-3.23747	0.00120596	0.0115756		ENSG00000151718	WWC2	90.6617	-3.05184	0.902341	-3.38213	0.000719253	0.00770605		Tspan33__chr6	-2.07782	0.0211013
ENSG00000164164	OTUD4	178.021	-2.47586	0.628551	-3.93899	8.18249e-05	0.00135101		ENSG00000177300	CLDN22	19.0171	-5.175	1.81854	-2.84569	0.00443159	0.0314083		Fbrs__chr7	-2.08093	0.0156386
ENSG00000170365	SMAD1	95.5429	-2.14794	0.819689	-2.62043	0.00878194	0.0512059		ENSG00000151726	ACSL1	1448.58	-3.67224	0.617703	-5.94499	2.76467e-09	2.36519e-07		Dido1__chr2	-2.08157	0.0106568
ENSG00000151611	MMAA	78.9043	-2.63768	0.840561	-3.138	0.00170105	0.0150534		ENSG00000151729	SLC25A4	926.619	2.25156	0.623748	3.60973	0.000306512	0.0039673		Kdm2a__chr19	-2.09667	0.000546096
ENSG00000071205	ARHGAP10	17.7097	-7.61372	1.99255	-3.82109	0.000132862	0.0019986		ENSG00000154556	SORBS2	552.997	-3.76146	0.698943	-5.38165	7.38074e-08	3.97566e-06		Dnase1l3__chr14	-2.09991	0.0130995
ENSG00000151623	NR3C2	34.4692	-8.56755	1.77064	-4.83866	1.30717e-06	4.95827e-05		ENSG00000109794	FAM149A	48.2325	-4.90984	1.38003	-3.55777	0.000374023	0.00461343		Unc93b1__chr19	-2.10077	0.0243454
ENSG00000198589	LRBA	101.546	-2.707	0.734501	-3.6855	0.000228252	0.00312215		ENSG00000164344	KLKB1	274.043	-2.83826	0.923649	-3.07288	0.00212005	0.0180888		Rundc1__chr11	-2.10292	0.0277373
ENSG00000145425	RPS3A	4814.88	1.93396	0.780133	2.47901	0.0131746	0.0687861		ENSG00000088926	F11	216.186	-2.35178	0.847733	-2.7742	0.00553384	0.0368723		Tdp2__chr13	-2.10541	0.010028
ENSG00000109686	SH3D19	1879.85	1.56278	0.675911	2.31211	0.0207719	0.0961294		ENSG00000249915	PDCD6	996.328	2.35423	0.614706	3.82985	0.00012822	0.00195358		Ercc5__chr1	-2.10787	0.0199568
ENSG00000109670	FBXW7	59.2075	-2.65536	0.944363	-2.8118	0.0049265	0.0335387		ENSG00000063438	AHRR	61.9399	3.54782	1.02804	3.45106	0.000558392	0.00630121		Pomgnt1__chr4	-2.10969	0.0402248
ENSG00000109654	TRIM2	83.3429	-2.36643	0.78991	-2.99583	0.00273702	0.0215338		ENSG00000071539	TRIP13	45.5845	3.05065	1.14397	2.66671	0.00765985	0.0475339		Fgfr4__chr13	-2.11294	0.0403612
ENSG00000121210	KIAA0922	73.8945	-2.42744	0.938207	-2.58732	0.00967248	0.055025		ENSG00000174358	SLC6A19	698.772	8.21531	1.00802	8.14994	3.64113e-16	1.26632e-13		Zfp800__chr6	-2.11393	0.0180105
ENSG00000137462	TLR2	19.1536	-6.41929	1.96804	-3.26177	0.00110717	0.0108537		ENSG00000153395	LPCAT1	83.1195	3.8624	1.23101	3.13758	0.00170348	0.0152674		Galnt11__chr5	-2.11451	0.0365973
ENSG00000171564	FGB	64655.1	-2.40775	1.03793	-2.31976	0.0203541	0.0947512		ENSG00000171421	MRPL36	464.172	1.63171	0.649022	2.51411	0.0119333	0.0657856		Klf4__chr4	-2.11702	0.0434315
ENSG00000171560	FGA	52085.7	-2.40491	1.03822	-2.31638	0.0205373	0.0953098		ENSG00000145536	ADAMTS16	20.9874	-5.0006	1.8943	-2.63982	0.00829513	0.05042		Rdh11__chr12	-2.13728	0.0139697
ENSG00000164116	GUCY1A3	37.7633	-8.69706	1.98048	-4.39138	1.12634e-05	0.000275935		ENSG00000133398	MED10	251.408	2.3334	0.714874	3.26407	0.00109824	0.0108187		Nostrin__chr2	-2.13776	0.00296152
ENSG00000061918	GUCY1B3	47.662	-9.03513	1.9281	-4.68602	2.78562e-06	8.8632e-05		ENSG00000112941	PAPD7	55.7078	-3.03915	1.0963	-2.7722	0.00556788	0.037031		Atp13a1__chr8	-2.15732	0.0101092
ENSG00000151790	TDO2	1560.02	-3.46374	0.980465	-3.53275	0.000411254	0.00504616		ENSG00000150753	CCT5	2307.08	3.31217	0.702976	4.71164	2.45732e-06	7.45091e-05		Nr6a1__chr2	-2.16045	0.0229261
ENSG00000145431	PDGFC	53.9902	-3.1155	0.924572	-3.36966	0.000752597	0.00801787		ENSG00000112977	DAP	1526.94	2.96163	0.662701	4.46903	7.85769e-06	0.000194895		Ing5__chr1	-2.16186	0.0490145
ENSG00000109738	GLRB	7.27016	6.58804	2.30637	2.85645	0.00428408	0.0301944		ENSG00000154122	ANKH	200.124	-3.20676	0.838716	-3.82341	0.000131617	0.00199773		Ecm1__chr3	-2.16288	0.021491
ENSG00000164125	FAM198B	35.4571	-4.09149	1.54173	-2.65383	0.00795828	0.0476778		ENSG00000176788	BASP1	25.8196	-6.51197	1.96924	-3.30684	0.000943545	0.00957794		Rrp8__chr7	-2.17107	0.0286603
ENSG00000052795	FNIP2	153.522	-5.26712	0.77176	-6.82482	8.80386e-12	1.87105e-09		ENSG00000113384	GOLPH3	3819.83	2.56458	0.60583	4.23317	2.30418e-05	0.000476258		Tnrc6c__chr11	-2.17271	0.02172
ENSG00000109756	RAPGEF2	52.7642	-3.97385	1.00064	-3.97133	7.14731e-05	0.0012127		ENSG00000113387	SUB1	2865.12	2.57241	0.591011	4.35256	1.34558e-05	0.000304047		Cdk10__chr8	-2.17593	0.0103011
ENSG00000164128	NPY1R	22.2326	-7.93025	2.28522	-3.47024	0.000520001	0.00604069		ENSG00000113407	TARS	357.522	1.87102	0.807801	2.31619	0.0205477	0.0972837		C4b__chr17	-2.17798	0.00863232
ENSG00000164129	NPY5R	9.50876	-6.70806	2.77489	-2.41742	0.0156311	0.078094		ENSG00000039560	RAI14	150.507	-2.43923	0.812019	-3.00391	0.00266531	0.021384		Ing4__chr6	-2.18552	0.0157162
ENSG00000145416	2001-03-01	11.3411	-5.65444	2.12429	-2.6618	0.00777229	0.0468602		ENSG00000113460	BRIX1	180.323	2.05033	0.848706	2.41583	0.0156992	0.0800371		Tubgcp5__chr7	-2.18644	0.0177903
ENSG00000109466	KLHL2	69.3288	-2.35409	0.914074	-2.57538	0.0100129	0.056438		ENSG00000113494	PRLR	122.379	-3.40392	0.855325	-3.97968	6.90082e-05	0.00118965		Ndfip1__chr18	-2.19136	0.016115
ENSG00000109511	ANXA10	132.62	-6.02206	0.95147	-6.32922	2.4641e-10	3.32093e-08		ENSG00000168685	IL7R	48.2856	-3.67766	1.13598	-3.23744	0.00120609	0.011671		Fem1a__chr17	-2.19145	0.00773808
ENSG00000145439	CBR4	130.106	-2.18839	0.721405	-3.03351	0.0024173	0.0195471		ENSG00000164188	RANBP3L	13.6726	-5.78532	2.19146	-2.63994	0.00829196	0.05042		Nuak2__chr1	-2.19872	0.0231615
ENSG00000154447	SH3RF1	30.3852	-3.08336	1.02236	-3.01594	0.00256187	0.0205061		ENSG00000164190	NIPBL	194.246	-2.96524	0.767174	-3.86515	0.000111019	0.0017464		Trmt1__chr8	-2.19893	0.00830719
ENSG00000137601	NEK1	54.4773	-2.76635	1.10702	-2.49891	0.0124576	0.0660409		ENSG00000197603	C5orf42	74.5633	-2.98779	0.948014	-3.15163	0.00162361	0.0147248		Tbc1d17__chr7	-2.20109	0.000538447
ENSG00000198948	MFAP3L	87.9498	-4.40201	0.910144	-4.83661	1.32073e-06	4.9872e-05		ENSG00000113594	LIFR	73.9878	-2.54736	1.02234	-2.4917	0.0127134	0.0688315		Ddhd2__chr8	-2.20415	0.0467069
ENSG00000164107	HAND2	24.3775	-8.07731	1.87537	-4.30705	1.65445e-05	0.000377765		ENSG00000082074	FYB	59.7093	-7.89445	1.72482	-4.57696	4.71785e-06	0.000126426		Tmem63b__chr17	-2.20855	0.0100327
ENSG00000164117	FBXO8	72.3612	-2.61333	0.978597	-2.67049	0.00757414	0.0461065		ENSG00000113600	C9	1517.9	-9.15462	0.908499	-10.0766	7.00799e-24	5.33875e-21		Nr5a2__chr1	-2.21296	0.00440862
ENSG00000150625	GPM6A	19.9319	-3.0844	1.32676	-2.32476	0.0200847	0.0938555		ENSG00000145592	RPL37	4322.14	2.15402	0.586977	3.66969	0.000242845	0.0032924		Traf4__chr11	-2.21319	0.00721434
ENSG00000218336	TENM3	15.3434	-6.11004	2.32645	-2.62634	0.00863086	0.0505561		ENSG00000112936	C7	128.209	-3.59244	1.375	-2.61269	0.00898331	0.0535159		Acad9__chr3	-2.22166	2.07e-08
ENSG00000151718	WWC2	107.316	-3.41376	0.714099	-4.78052	1.74845e-06	6.16684e-05		ENSG00000039537	C6	582.561	-6.16844	0.993226	-6.21051	5.28124e-10	5.31379e-08		Lemd2__chr17	-2.22215	0.00252029
ENSG00000177300	CLDN22	12.173	-4.52269	1.87369	-2.41378	0.0157878	0.0784988		ENSG00000112964	GHR	477.36	-3.53806	1.04621	-3.38178	0.00072018	0.00770605		Bcat2__chr7	-2.22311	0.0378798
ENSG00000173320	STOX2	54.8644	-5.1788	1.18327	-4.37668	1.20499e-05	0.000291181		ENSG00000112992	NNT	311.506	-2.12778	0.72238	-2.94551	0.00322425	0.0247512		Zfp259__chr9	-2.22709	0.00584934
ENSG00000168310	IRF2	114.126	-3.15434	0.757496	-4.16417	3.12489e-05	0.000634821		ENSG00000213949	ITGA1	620.807	-1.59471	0.640981	-2.48792	0.0128491	0.0693993		mtNd1__chrM	-2.22875	1.75e-06
ENSG00000151726	ACSL1	2007.49	-4.25567	0.841944	-5.05458	4.31337e-07	1.98619e-05		ENSG00000164171	ITGA2	96.0294	3.60291	1.11765	3.22366	0.00126565	0.01211		Zscan29__chr2	-2.23472	0.0231579
ENSG00000151729	SLC25A4	633.397	2.32526	0.850048	2.73545	0.00622951	0.0399329		ENSG00000134363	FST	179.023	-3.61408	1.19711	-3.019	0.00253608	0.0207213		Galnt10__chr11	-2.23834	0.0320672
ENSG00000154556	SORBS2	350.513	-3.41639	0.790464	-4.322	1.5462e-05	0.000358982		ENSG00000152669	CCNO	29.1958	8.29233	2.06072	4.024	5.72181e-05	0.00101708		Unc5b__chr10	-2.23947	0.0475351
ENSG00000145476	CYP4V2	666.975	-1.79292	0.726289	-2.4686	0.0135643	0.0703554		ENSG00000134352	IL6ST	982.632	-3.37824	0.620982	-5.44016	5.3234e-08	3.00932e-06		Ppp2r3a__chr9	-2.2398	0.00373811
ENSG00000164344	KLKB1	351.724	-3.56302	0.666932	-5.34241	9.1717e-08	5.37241e-06		ENSG00000152932	RAB3C	35.7569	3.68185	1.48996	2.4711	0.0134698	0.0719257		Fance__chr17	-2.24376	0.0116079
ENSG00000088926	F11	228.756	-3.03	0.6433	-4.71008	2.47616e-06	8.11213e-05		ENSG00000188725	SMIM15	215.464	2.28353	0.724648	3.15122	0.0016259	0.0147372		Arhgef10l__chr4	-2.24566	0.0181138
ENSG00000083857	FAT1	141.746	1.79528	0.771391	2.32733	0.0199477	0.0934584		ENSG00000086189	DIMT1	191.514	2.22687	0.962813	2.31287	0.0207296	0.0977849		Rsf1__chr7	-2.24738	0.00510738
ENSG00000249915	PDCD6	678.207	2.55029	0.599479	4.25418	2.0982e-05	0.000463141		ENSG00000153914	SREK1	243.161	-1.79982	0.731577	-2.4602	0.0138861	0.0733895		Ctsf__chr19	-2.2475	0.0463008
ENSG00000063438	AHRR	45.0346	2.73821	0.897472	3.05103	0.00228059	0.0187341		ENSG00000069020	MAST4	111.979	-2.24441	0.843583	-2.66057	0.00780095	0.0482411		Cdc40__chr10	-2.24982	0.0221589
ENSG00000174358	SLC6A19	462.333	7.9851	3.42623	2.33058	0.0197754	0.0930242		ENSG00000145675	PIK3R1	273.281	-4.23597	0.744292	-5.69127	1.26095e-08	8.6951e-07		Sox6__chr7	-2.25418	0.0145735
ENSG00000215217	C5orf49	22.717	-6.25748	2.09546	-2.98621	0.00282457	0.0220239		ENSG00000145740	SLC30A5	230.951	1.88944	0.717569	2.63311	0.00846063	0.0512702		Gripap1__chrX	-2.25509	0.0020405
ENSG00000112902	SEMA5A	54.5439	-2.68664	0.948582	-2.83227	0.00462186	0.0319502		ENSG00000134057	CCNB1	505.586	4.27331	0.761027	5.61518	1.96354e-08	1.2515e-06		Tsc1__chr2	-2.25565	0.0182032
ENSG00000150753	CCT5	1664.43	2.76636	0.847793	3.26301	0.00110235	0.0108192		ENSG00000153044	CENPH	90.1677	4.73156	1.06834	4.42887	9.47275e-06	0.000226162		Myo9b__chr8	-2.25676	0.048559
ENSG00000154122	ANKH	105.475	-2.28636	0.74183	-3.08205	0.00205581	0.0172903		ENSG00000085231	AK6	354.052	2.11959	0.793269	2.67197	0.00754072	0.0469894		Mrto4__chr4	-2.25833	0.00100419
ENSG00000154153	RETREG1	33.7842	-3.93111	1.13797	-3.45449	0.000551335	0.00634686		ENSG00000273841	TAF9	1503.66	3.93234	0.66929	5.87538	4.21867e-09	3.37451e-07		Ythdc1__chr5	-2.2621	5.77e-05
ENSG00000145555	MYO10	38.6964	-3.04883	0.916654	-3.32604	0.000880884	0.00905857		ENSG00000145734	BDP1	171.516	-4.54431	0.800816	-5.67459	1.39019e-08	9.42381e-07		Snx16__chr3	-2.26488	0.00454615
ENSG00000176788	BASP1	16.6611	-5.93495	1.75806	-3.37586	0.000735864	0.00788012		ENSG00000145741	BTF3	4170.95	3.64478	0.589737	6.18036	6.39572e-10	6.27723e-08		Mnt__chr11	-2.26641	0.0389591
ENSG00000113387	SUB1	1984.86	2.63407	0.830898	3.17015	0.00152363	0.0138017		ENSG00000049860	HEXB	2417.04	2.73645	0.612882	4.4649	8.01062e-06	0.000197768		Rsbn1l__chr5	-2.27069	0.00209806
ENSG00000113389	NPR3	44.9873	-5.70667	1.96035	-2.91104	0.00360222	0.0264685		ENSG00000254893	AC113404.3	213.722	1.76205	0.723347	2.43597	0.0148517	0.0770221		AU019823__chr9	-2.27974	2.79e-05
ENSG00000242110	AMACR	1584.43	3.33411	1.20671	2.76299	0.00572752	0.0374685		ENSG00000145703	IQGAP2	584.366	-2.4562	0.640186	-3.83669	0.000124703	0.0019091		Trove2__chr1	-2.28217	0.00734582
ENSG00000273294	C1QTNF3-AMACR	1390.88	3.18206	1.21323	2.6228	0.00872114	0.050923		ENSG00000145708	CRHBP	71.7171	-6.54549	1.99691	-3.27781	0.00104615	0.0104383		Ppig__chr2	-2.28236	1.43e-07
ENSG00000039560	RAI14	111.849	-2.02794	0.764467	-2.65275	0.00798392	0.0477969		ENSG00000132846	ZBED3	185.173	-3.2669	0.761983	-4.28736	1.80806e-05	0.000388781		4930581F22Rik__chr9	-2.28908	0.0349652
ENSG00000113460	BRIX1	123.842	2.31207	0.7586	3.04781	0.00230517	0.0188798		ENSG00000171530	TBCA	1483.64	1.88406	0.601675	3.13136	0.00174001	0.0155166		Upf2__chr2	-2.29005	0.00287185
ENSG00000113494	PRLR	70.46	-2.86946	0.874674	-3.28061	0.00103583	0.0102821		ENSG00000132837	DMGDH	321.308	-2.02481	0.786111	-2.57573	0.010003	0.0579913		Snrnp70__chr7	-2.29152	3.01e-05
ENSG00000164187	LMBRD2	70.5146	-2.43829	0.930899	-2.61929	0.00881136	0.0513052		ENSG00000145692	BHMT	974.852	-3.56277	0.778177	-4.57836	4.68637e-06	0.000125793		Pygo2__chr3	-2.29262	0.0135981
ENSG00000164188	RANBP3L	11.4991	-5.66998	1.98794	-2.85218	0.00434203	0.0305071		ENSG00000152409	JMY	93.5683	-3.50878	0.953655	-3.6793	0.000233877	0.00320339		Mfsd3__chr15	-2.29472	0.00647507
ENSG00000164190	NIPBL	188.098	-2.97804	0.724692	-4.10939	3.96702e-05	0.000768239		ENSG00000164309	CMYA5	82.6134	-3.60633	0.987626	-3.65151	0.000260705	0.00348434		Mob3c__chr4	-2.29982	0.0320385
ENSG00000113594	LIFR	214.368	-4.57451	0.807234	-5.6669	1.45406e-08	1.12635e-06		ENSG00000113319	RASGRF2	18.4894	-4.73426	2.04233	-2.31807	0.0204457	0.0970305		Prkag2__chr5	-2.30197	0.00369225
ENSG00000082074	FYB	41.1668	-7.32149	1.58959	-4.60591	4.10674e-06	0.000121567		ENSG00000172497	ACOT12	219.436	-6.88545	1.03297	-6.66569	2.63426e-11	3.51191e-09		Lmbr1__chr5	-2.30386	0.0490006
ENSG00000113600	C9	5243.69	-10.862	1.07472	-10.1069	5.15018e-24	1.06718e-20		ENSG00000152348	ATG10	6120.27	3.07413	0.612089	5.02236	5.10408e-07	2.05163e-05		Mafg__chr11	-2.30655	1.42e-06
ENSG00000145592	RPL37	3079.96	2.1217	0.733308	2.89332	0.00381188	0.0275576		ENSG00000186468	RPS23	10424.1	3.19433	0.60952	5.24073	1.59939e-07	7.61518e-06		Cyp2d13__chr15	-2.30668	0.00776832
ENSG00000112936	C7	339.417	-5.72058	1.27438	-4.4889	7.15932e-06	0.000190625		ENSG00000174695	TMEM167A	421.636	1.89545	0.677433	2.79799	0.00514217	0.035036		Atrx__chrX	-2.30683	0.000892036
ENSG00000039537	C6	789.935	-6.26534	1.02673	-6.10224	1.04592e-09	1.20405e-07		ENSG00000038427	VCAN	276.929	3.3692	0.839088	4.01531	5.93686e-05	0.00105064		Thoc2__chrX	-2.30927	1.39e-05
ENSG00000112964	GHR	277.237	-3.80133	0.66432	-5.72213	1.05197e-08	8.50663e-07		ENSG00000127184	COX7C	6640.84	2.16192	0.588369	3.67443	0.000238385	0.00324292		AI317395__chr10	-2.31305	0.000132299
ENSG00000112992	NNT	347.386	-2.64172	0.638432	-4.13782	3.50621e-05	0.000696911		ENSG00000081189	MEF2C	11.8129	-6.75576	2.59398	-2.6044	0.0092035	0.0545325		Zbtb21__chr16	-2.31325	0.00683927
ENSG00000164588	HCN1	6.48822	5.34335	2.18966	2.44026	0.0146767	0.074571		ENSG00000164292	RHOBTB3	275.026	-1.76161	0.693176	-2.54136	0.0110423	0.0619699		F10__chr8	-2.31441	4.64e-05
ENSG00000164171	ITGA2	64.1568	3.08225	1.25261	2.46066	0.0138683	0.0714953		ENSG00000153922	CHD1	100.312	-2.25717	0.865289	-2.60857	0.00909209	0.0540538		Nat6__chr9	-2.31483	0.0102647
ENSG00000152669	CCNO	18.8248	7.95754	1.7975	4.427	9.55507e-06	0.000242193		ENSG00000145725	PPIP5K2	184.239	-1.74242	0.74125	-2.35065	0.0187407	0.0912117		Mospd2__chrX	-2.31649	0.0246577
ENSG00000134352	IL6ST	1109.31	-3.64933	0.615839	-5.92578	3.10812e-09	3.14166e-07		ENSG00000181751	C5orf30	29.6579	5.88721	1.85468	3.17424	0.00150228	0.0138522		Dcaf6__chr1	-2.31856	0.00128617
ENSG00000035499	DEPDC1B	9.78103	6.07583	1.93576	3.13873	0.00169682	0.0150337		ENSG00000151422	FER	89.3125	-2.89961	0.904041	-3.20739	0.00133946	0.0126051		Arl16__chr11	-2.32131	0.0258493
ENSG00000130449	ZSWIM6	48.0683	-3.22606	0.870006	-3.70809	0.000208827	0.00290658		ENSG00000198961	PJA2	280.575	-1.89032	0.694956	-2.72005	0.00652721	0.041903		Mcrs1__chr15	-2.32549	0.0144545
ENSG00000186479	RGS7BP	7.74312	-6.42535	2.19741	-2.92405	0.00345505	0.025649		ENSG00000171444	MCC	77.0436	-3.37773	1.20159	-2.81104	0.00493812	0.033833		Slc35d1__chr4	-2.33018	0.00113092
ENSG00000112851	ERBIN	187.221	-1.90916	0.643802	-2.96544	0.00302249	0.0231		ENSG00000177879	AP3S1	559.947	2.07781	0.68761	3.02179	0.00251287	0.0205526		Nfix__chr8	-2.33084	0.000743278
ENSG00000153914	SREK1	199.792	-1.67366	0.627774	-2.66602	0.00767555	0.046471		ENSG00000145781	COMMD10	192.895	2.70347	0.763827	3.53937	0.00040108	0.00489619		Nf1__chr11	-2.33387	0.00135623
ENSG00000069020	MAST4	114.545	-2.40061	0.86368	-2.77951	0.00544412	0.0360844		ENSG00000172869	DMXL1	57.232	-3.41608	1.11722	-3.05764	0.00223084	0.0187147		Abt1__chr13	-2.3367	0.0166719
ENSG00000145675	PIK3R1	97.2416	-2.77062	0.864696	-3.20415	0.00135462	0.0126334		ENSG00000168938	PPIC	430.96	2.52497	0.720336	3.50527	0.000456147	0.00540151		Bcl7a__chr5	-2.34457	0.00604042
ENSG00000153044	CENPH	61.0412	4.08986	0.919297	4.4489	8.63124e-06	0.000223214		ENSG00000064651	SLC12A2	521.086	2.08276	0.669012	3.11318	0.00185081	0.0162243		Tc2n__chr12	-2.34709	0.0347812
ENSG00000085231	AK6	262.111	2.00135	0.78574	2.54709	0.0108626	0.0597446		ENSG00000169567	HINT1	9256.39	2.7919	0.58291	4.78959	1.6712e-06	5.4452e-05		Sec14l4__chr11	-2.34789	9.85e-05
ENSG00000273841	TAF9	1075.6	3.05961	0.793429	3.85619	0.000115167	0.00178423		ENSG00000158987	RAPGEF6	127.967	-2.06914	0.859393	-2.40768	0.0160544	0.0814391		Ehbp1l1__chr19	-2.3489	0.00698811
ENSG00000145734	BDP1	199.255	-4.85034	0.843825	-5.74805	9.02799e-09	7.45371e-07		ENSG00000273217	AC008695.1	106.058	-3.28575	1.01118	-3.24944	0.00115633	0.0112798		Med12__chrX	-2.35059	0.0110337
ENSG00000145741	BTF3	2923.88	3.16925	0.721231	4.39423	1.11168e-05	0.000273823		ENSG00000072682	P4HA2	244.43	1.93311	0.726544	2.66069	0.00779798	0.0482411		Zkscan8__chr13	-2.35164	0.0389873
ENSG00000049860	HEXB	1701.9	2.65158	0.733352	3.61569	0.000299544	0.00390524		ENSG00000197536	C5orf56	31.8718	-3.76558	1.3249	-2.84216	0.00448093	0.0316569		Lmbr1l__chr15	-2.35502	0.0464155
ENSG00000198780	FAM169A	22.5208	3.75241	1.35429	2.77076	0.00559263	0.0367747		ENSG00000164404	GDF9	478.427	1.84114	0.648687	2.83826	0.00453606	0.0319401		2510002D24Rik__chr16	-2.35508	0.0269006
ENSG00000113161	HMGCR	253.846	2.66715	0.890873	2.99386	0.00275474	0.0216218		ENSG00000164405	UQCRQ	5908.58	1.44355	0.58458	2.46937	0.0135351	0.0721781		Slc22a18__chr7	-2.35646	0.00399172
ENSG00000113163	COL4A3BP	111.966	-1.96058	0.776899	-2.5236	0.0116159	0.0627219		ENSG00000164406	LEAP2	1496.63	-5.03509	0.889126	-5.66297	1.48779e-08	9.95888e-07		Nfx1__chr4	-2.35814	4.44e-05
ENSG00000145703	IQGAP2	865.705	-3.23028	0.707472	-4.56595	4.97231e-06	0.000141625		ENSG00000072364	AFF4	579.855	-3.65108	0.785145	-4.6502	3.3161e-06	9.54155e-05		Apob__chr12	-2.36694	0.00101393
ENSG00000145708	CRHBP	452.547	-12.2844	1.74271	-7.04905	1.80142e-12	4.52457e-10		ENSG00000213585	VDAC1	2826.56	2.69093	0.610595	4.40706	1.04782e-05	0.000245793		Tlcd2__chr11	-2.37391	0.0184042
ENSG00000132846	ZBED3	79.1789	-1.9857	0.812446	-2.4441	0.0145212	0.0740215		ENSG00000113558	SKP1	3233.52	2.30366	0.638942	3.60543	0.000311632	0.0040248		Orc2__chr1	-2.37469	0.0486441
ENSG00000171530	TBCA	1085.71	1.77862	0.621247	2.86299	0.00419666	0.0296666		ENSG00000272772	AC104109.3	868.146	2.38916	0.63926	3.73739	0.00018594	0.00263946		Chd3__chr11	-2.37782	0.000194957
ENSG00000145692	BHMT	341.125	-2.72836	0.849107	-3.21321	0.0013126	0.0123141		ENSG00000113575	PPP2CA	1682.29	2.80871	0.729348	3.85099	0.00011764	0.00182897		Bptf__chr11	-2.38005	0.000406933
ENSG00000152409	JMY	67.8363	-2.98535	0.903511	-3.30416	0.000952601	0.00965236		ENSG00000237190	CDKN2AIPNL	241.745	2.23798	0.766402	2.92011	0.00349909	0.0263304		Git1__chr11	-2.38105	0.0190649
ENSG00000164309	CMYA5	118.073	-4.65537	1.0833	-4.2974	1.7281e-05	0.00039242		ENSG00000043143	JADE2	60.521	-2.75344	1.01166	-2.72171	0.00649458	0.0417606		D930016D06Rik__chr5	-2.38456	0.00451079
ENSG00000164300	SERINC5	321.178	-1.77705	0.714492	-2.48715	0.0128769	0.0676152		ENSG00000145833	DDX46	258.594	-1.68296	0.699623	-2.40553	0.0161491	0.0818352		Usp34__chr11	-2.3862	5.53e-05
ENSG00000172497	ACOT12	173.719	-6.55489	0.926816	-7.07248	1.52184e-12	3.88115e-10		ENSG00000113658	SMAD5	226.777	-1.85084	0.736902	-2.51165	0.0120167	0.0661309		Dek__chr13	-2.3864	0.000168619
ENSG00000152348	ATG10	4188.29	3.01877	0.806715	3.74206	0.000182519	0.00260604		ENSG00000120733	KDM3B	88.5906	-2.34819	0.915338	-2.56538	0.0103063	0.0590757		Elf1__chr14	-2.39494	0.00414984
ENSG00000186468	RPS23	7109.72	3.13533	0.817229	3.83654	0.000124779	0.0018997		ENSG00000132563	REEP2	54.2162	3.6193	1.15274	3.13974	0.00169098	0.0152041		Zfp629__chr7	-2.39593	0.0296579
ENSG00000127184	COX7C	4431.1	2.55548	0.738519	3.46028	0.000539612	0.00622838		ENSG00000113013	HSPA9	3630.15	2.24309	0.647283	3.4654	0.000529446	0.00605871		Rest__chr5	-2.39618	0.00766906
ENSG00000081189	MEF2C	54.7847	-9.24024	1.6733	-5.52216	3.34859e-08	2.32258e-06		ENSG00000146006	LRRTM2	26.9022	-5.86866	1.82425	-3.21702	0.00129531	0.0123127		Slc39a6__chr18	-2.40079	0.0357442
ENSG00000113369	ARRDC3	103.869	-2.23938	0.821522	-2.72589	0.00641283	0.0407769		ENSG00000120727	PAIP2	649.521	1.63407	0.630679	2.59096	0.00957075	0.0561058		Opa3__chr7	-2.40601	0.00851437
ENSG00000175745	NR2F1	32.8635	-2.63346	1.02804	-2.56164	0.0104178	0.0580103		ENSG00000170482	SLC23A1	741.936	-2.77778	0.922343	-3.01165	0.00259828	0.0210388		Slc22a15__chr3	-2.40842	0.044762
ENSG00000164292	RHOBTB3	283.479	-1.99505	0.746529	-2.67243	0.00753033	0.0459104		ENSG00000170476	MZB1	101.042	-5.90398	1.36112	-4.33759	1.44057e-05	0.000322776		Gm6402__chr17	-2.40982	0.0258469
ENSG00000175426	PCSK1	10.8473	7.14758	2.43167	2.93937	0.00328878	0.0247045		ENSG00000249751	ECSCR	11.5652	-6.61347	2.66467	-2.48191	0.0130681	0.0703206		Mtmr14__chr6	-2.41769	0.0163387
ENSG00000164307	ERAP1	243.608	-1.98641	0.803541	-2.47207	0.0134334	0.0698514		ENSG00000184584	TMEM173	40.1584	-3.61492	1.2058	-2.99794	0.00271812	0.0216625		Mysm1__chr4	-2.41933	0.000125937
ENSG00000153922	CHD1	118.431	-2.65601	0.685876	-3.87243	0.000107754	0.0017045		ENSG00000131508	UBE2D2	634.31	1.7195	0.685094	2.50987	0.0120775	0.0663743		Phactr2__chr10	-2.42489	0.0158586
ENSG00000145725	PPIP5K2	178.96	-1.87992	0.718973	-2.61474	0.00892963	0.0518042		ENSG00000185129	PURA	178.868	-3.52395	0.779859	-4.51871	6.22184e-06	0.000159514		Plcb1__chr2	-2.43505	0.00562564
ENSG00000151422	FER	86.6888	-3.09023	0.828754	-3.72877	0.000192417	0.00272158		ENSG00000182700	IGIP	36.6328	-4.58652	1.31188	-3.49613	0.000472061	0.00555705		Ccnl1__chr3	-2.4392	0.000499446
ENSG00000198961	PJA2	289.74	-2.14008	0.688838	-3.1068	0.00189125	0.0162488		ENSG00000120306	CYSTM1	2110.54	3.71952	0.661264	5.62486	1.85664e-08	1.20742e-06		Zfp740__chr15	-2.43967	0.00605761
ENSG00000164209	SLC25A46	215.795	-2.19519	0.665841	-3.29687	0.000977678	0.00983433		ENSG00000113068	PFDN1	181.575	2.29648	0.790145	2.9064	0.00365615	0.0271673		Prpf38b__chr3	-2.44161	5.33e-05
ENSG00000145777	TSLP	28.174	-6.67075	1.80581	-3.69405	0.000220712	0.00304385		ENSG00000170458	CD14	1197.99	-4.67762	1.05727	-4.42424	9.67836e-06	0.000230408		Rbm22__chr18	-2.44369	0.0272956
ENSG00000134987	WDR36	182.992	-2.02475	0.864351	-2.34251	0.0191546	0.0909705		ENSG00000204967	PCDHA4	79.3076	-3.60824	1.00598	-3.58679	0.000334768	0.00423695		Taf1__chrX	-2.44409	0.00234526
ENSG00000134986	NREP	188.355	3.29474	0.838687	3.92845	8.54943e-05	0.0014046		ENSG00000254221	PCDHGB1	32.1518	-2.95962	1.26721	-2.33554	0.0195154	0.0939506		Rasa2__chr9	-2.44512	0.0105806
ENSG00000212643	ZRSR1	12.6174	-3.57014	1.40461	-2.54173	0.0110307	0.0603682		ENSG00000253537	PCDHGA7	30.3661	-3.18984	1.32153	-2.41375	0.0157893	0.0804191		Mettl18__chr1	-2.44814	0.0230786
ENSG00000171444	MCC	62.513	-3.69583	0.909299	-4.06449	4.8138e-05	0.000896611		ENSG00000240764	PCDHGC5	28.5399	-3.10566	1.34261	-2.31315	0.0207144	0.0977546		Hps4__chr5	-2.45082	0.00258137
ENSG00000172869	DMXL1	87.4635	-4.14666	0.806743	-5.14	2.7474e-07	1.37179e-05		ENSG00000156453	PCDH1	107.79	3.49122	1.23799	2.82007	0.0048013	0.0331683		Ctnnbl1__chr2	-2.45119	0.0425247
ENSG00000155324	GRAMD3	105.162	-2.35716	0.707857	-3.32999	0.00086849	0.00895891		ENSG00000113580	NR3C1	221.031	-2.88208	0.735277	-3.91971	8.86539e-05	0.00146064		2810006K23Rik__chr5	-2.45929	0.0127201
ENSG00000169567	HINT1	6797.67	2.32959	0.680686	3.42241	0.000620687	0.00695211		ENSG00000145817	YIPF5	287.633	1.96837	0.700519	2.80987	0.00495613	0.0339419		Mfsd8__chr3	-2.45978	0.0269845
ENSG00000158987	RAPGEF6	102.149	-1.87425	0.715383	-2.61993	0.00879483	0.0512269		ENSG00000275740	AC091959.3	114.609	-2.03669	0.829733	-2.45463	0.0141028	0.0741443		mtCo1__chrM	-2.461	9.17e-05
ENSG00000273217	AC008695.1	70.0919	-2.55047	0.881806	-2.89232	0.00382403	0.0276093		ENSG00000091009	RBM27	139.171	-2.38693	0.804346	-2.96754	0.00300198	0.0234386		Llgl1__chr11	-2.46207	0.0263515
ENSG00000197536	C5orf56	17.2077	-2.85135	1.21141	-2.35374	0.0185858	0.0888654		ENSG00000164266	SPINK1	3886.08	2.58184	0.953812	2.70686	0.00679221	0.0432226		Tmem192__chr8	-2.46282	0.0219571
ENSG00000198944	SOWAHA	25.4547	6.25902	1.70277	3.67578	0.000237125	0.00321671		ENSG00000173210	ABLIM3	191.728	-3.63239	1.10071	-3.30005	0.000966659	0.00976918		Mphosph8__chr14	-2.46352	5.15e-05
ENSG00000164406	LEAP2	658.644	-3.30429	1.08786	-3.03742	0.00238614	0.0193234		ENSG00000182578	CSF1R	43.7945	-8.82655	1.90883	-4.62407	3.76288e-06	0.000105797		Zfp113__chr5	-2.46531	0.00838401
ENSG00000072364	AFF4	263.881	-2.53134	0.688209	-3.67816	0.000234926	0.00319997		ENSG00000113721	PDGFRB	99.0632	-3.41316	1.30186	-2.62176	0.00874782	0.0526119		Usp6nl__chr2	-2.46598	0.00385157
ENSG00000213585	VDAC1	2048.54	2.3629	0.718179	3.29012	0.00100144	0.0100125		ENSG00000019582	CD74	2093.83	-5.80872	0.933265	-6.22408	4.84385e-10	4.93579e-08		Xrn1__chr9	-2.46697	0.0179256
ENSG00000081059	TCF7	91.7323	2.29045	0.887992	2.57936	0.00989836	0.05604		ENSG00000164587	RPS14	7323.72	2.21777	0.591531	3.7492	0.000177402	0.00254536		Tenc1__chr15	-2.46864	0.00257302
ENSG00000113558	SKP1	2316.47	2.17037	0.623527	3.4808	0.000499919	0.0058608		ENSG00000171992	SYNPO	257.739	-5.1901	0.773708	-6.70809	1.97188e-11	2.71949e-09		Pramef8__chr4	-2.47303	0.0243335
ENSG00000272772	AC104109.3	600.449	2.47218	0.632201	3.91043	9.2132e-05	0.00149293		ENSG00000211445	GPX3	18197.4	3.22371	0.605303	5.32578	1.0052e-07	5.02537e-06		Sfi1__chr11	-2.47367	0.0304626
ENSG00000113575	PPP2CA	1227.59	2.36628	0.769166	3.07642	0.00209499	0.0175221		ENSG00000145901	TNIP1	412.707	-2.10712	0.659232	-3.19632	0.00139192	0.0130375		Msh2__chr17	-2.4765	0.0377485
ENSG00000237190	CDKN2AIPNL	173.679	2.13159	0.765888	2.78316	0.00538318	0.0358569		ENSG00000155508	CNOT8	150.503	2.03706	0.795805	2.55974	0.010475	0.0597428		Safb2__chr17	-2.48214	1.28e-05
ENSG00000113615	SEC24A	131.584	-1.86827	0.780363	-2.39411	0.0166609	0.0819064		ENSG00000145850	TIMD4	16.2968	-6.05962	2.46901	-2.45427	0.014117	0.0741443		Fcgr2b__chr1	-2.48254	0.032323
ENSG00000145833	DDX46	270.513	-1.94844	0.670446	-2.90618	0.00365868	0.0267298		ENSG00000221886	ZBED8	16.5406	5.02912	1.89719	2.65083	0.00802952	0.0492547		Amigo1__chr3	-2.48469	0.0461533
ENSG00000145824	CXCL14	154.925	-5.77472	1.21665	-4.74639	2.0708e-06	7.10717e-05		ENSG00000164611	PTTG1	200.332	4.63243	1.14064	4.06125	4.88111e-05	0.000892435		Fam65b__chr13	-2.48542	0.00802269
ENSG00000113658	SMAD5	174.689	-1.68326	0.63232	-2.66204	0.00776689	0.0468602		ENSG00000113328	CCNG1	806.621	1.74631	0.678824	2.57255	0.0100952	0.0583086		Jrkl__chr9	-2.48858	0.016119
ENSG00000177733	HNRNPA0	351.237	1.90359	0.754144	2.52417	0.0115971	0.0626616		ENSG00000113643	RARS	701.878	2.35325	0.667485	3.52555	0.000422598	0.0050909		Golga2__chr2	-2.49012	0.000194975
ENSG00000031003	FAM13B	62.3804	-2.16651	0.870892	-2.48769	0.0128575	0.0675556		ENSG00000120137	PANK3	546.738	-2.3637	0.647692	-3.64943	0.000262826	0.00350391		Ifnar2__chr16	-2.49071	4.12e-09
ENSG00000158402	CDC25C	10.0051	7.05031	2.14647	3.2846	0.00102127	0.010174		ENSG00000043462	LCP2	35.8888	-7.17326	1.87724	-3.82117	0.000132822	0.00201221		Pdia4__chr6	-2.49283	0.00180277
ENSG00000132563	REEP2	37.2592	3.74554	1.23293	3.03791	0.00238223	0.0193106		ENSG00000181163	NPM1	6793.31	3.92788	0.610923	6.42941	1.28097e-10	1.44317e-08		Tmtc4__chr14	-2.49719	0.0329536
ENSG00000120727	PAIP2	484.777	1.51895	0.641108	2.36925	0.017824	0.086369		ENSG00000120129	DUSP1	1646.58	-4.62069	0.896952	-5.15155	2.58344e-07	1.1577e-05		Mbd4__chr6	-2.5078	0.0188305
ENSG00000170476	MZB1	22.9607	-4.14684	1.62268	-2.55554	0.0106022	0.0587608		ENSG00000037241	RPL26L1	255.199	2.84079	0.755154	3.76187	0.000168648	0.00244609		H2-Eb1__chr17	-2.50842	0.010857
ENSG00000279686	AC142391.1	20.6444	-7.82662	2.13243	-3.67029	0.00024228	0.00326792		ENSG00000113732	ATP6V0E1	1488.46	1.71726	0.604978	2.83855	0.00453191	0.031939		Scyl2__chr10	-2.51401	0.0430131
ENSG00000249751	ECSCR	27.4103	-8.23611	2.0811	-3.95757	7.57157e-05	0.00127104		ENSG00000113739	STC2	31.8606	7.4918	2.03559	3.68041	0.000232858	0.00319217		Casp8ap2__chr4	-2.51492	0.0176384
ENSG00000184584	TMEM173	62.7544	-4.4149	1.08988	-4.05082	5.10377e-05	0.000943202		ENSG00000113742	CPEB4	222.882	-3.36219	0.732343	-4.591	4.4113e-06	0.000120225		Arhgap17__chr7	-2.51638	0.015312
ENSG00000185129	PURA	164.571	-3.45508	0.714542	-4.83538	1.32891e-06	5.00666e-05		ENSG00000051596	THOC3	156	2.22648	0.801176	2.77901	0.00545246	0.0364517		Snhg4__chr18	-2.5181	0.037793
ENSG00000182700	IGIP	16.1333	-3.47398	1.23044	-2.82337	0.00475224	0.0326071		ENSG00000048162	NOP16	593.015	1.83353	0.637854	2.87453	0.00404629	0.0292775		Rtf1__chr2	-2.52019	1.06e-07
ENSG00000120306	CYSTM1	1441.11	3.26561	0.67998	4.80251	1.56693e-06	5.67685e-05		ENSG00000160883	HK3	59.9808	-9.33372	1.83194	-5.095	3.48742e-07	1.46052e-05		Cbx1__chr11	-2.52158	0.0174286
ENSG00000131503	ANKHD1	324.459	-1.91229	0.58874	-3.24811	0.00116173	0.0112342		ENSG00000160867	FGFR4	1627.11	2.06204	0.801385	2.5731	0.0100793	0.0583086		Kdelc2__chr9	-2.52192	0.0027029
ENSG00000254996	ANKHD1-EIF4EBP3	434.759	-2.11716	0.639727	-3.30947	0.000934723	0.00951776		ENSG00000169228	RAB24	432.966	1.86253	0.659864	2.8226	0.00476366	0.0330195		Tnrc6b__chr15	-2.52363	0.00056386
ENSG00000243056	EIF4EBP3	135.396	-2.87271	1.02199	-2.81091	0.00494021	0.0336182		ENSG00000213347	MXD3	2083.49	2.44512	0.619251	3.94852	7.8637e-05	0.00131594		Maoa__chrX	-2.52397	0.00520533
ENSG00000170458	CD14	1277.94	-3.88886	1.00565	-3.867	0.000110182	0.00172636		ENSG00000169230	PRELID1	2706.84	2.88974	0.608575	4.74837	2.05064e-06	6.50914e-05		Il11ra1__chr4	-2.52666	0.000294123
ENSG00000204967	PCDHA4	44.9089	-2.80072	1.06315	-2.63436	0.00842954	0.0496576		ENSG00000169223	LMAN2	3812.3	2.26201	0.614505	3.68103	0.000232298	0.00318846		Taf4b__chr18	-2.52773	0.0422948
ENSG00000204956	PCDHGA1	51.542	-4.03388	0.88788	-4.54327	5.53882e-06	0.000155037		ENSG00000131187	F12	3943.77	-2.06025	0.802128	-2.56848	0.0102146	0.0587605		Stxbp2__chr8	-2.53003	3.15e-05
ENSG00000081853	PCDHGA2	53.5069	-3.02045	0.862853	-3.50054	0.000464317	0.00552151		ENSG00000198055	GRK6	601.829	-1.8542	0.785606	-2.36021	0.0182645	0.089616		Slc4a4__chr5	-2.5303	1.82e-05
ENSG00000254245	PCDHGA3	50.8533	-4.0952	0.892473	-4.5886	4.46232e-06	0.000130232		ENSG00000131188	PRR7	72.864	3.24644	0.956366	3.39455	0.000687404	0.00742044		Acer2__chr4	-2.53277	0.00425516
ENSG00000254221	PCDHGB1	51.3319	-3.78678	0.866961	-4.36788	1.25461e-05	0.000301414		ENSG00000113758	DBN1	150.759	3.44878	0.913132	3.77686	0.000158816	0.00233676		Esrp2__chr8	-2.53455	0.000932282
ENSG00000262576	PCDHGA4	51.1495	-3.92436	0.877966	-4.46983	7.82828e-06	0.000205331		ENSG00000196923	PDLIM7	175.859	2.05748	0.74976	2.74418	0.00606617	0.0395302		Zbtb7a__chr10	-2.53739	3.51e-05
ENSG00000253910	PCDHGB2	51.742	-3.61986	0.872628	-4.14823	3.35048e-05	0.00067279		ENSG00000146067	FAM193B	115.165	-1.9444	0.826883	-2.35148	0.0186989	0.0910361		Casp4__chr9	-2.54029	0.0440061
ENSG00000262209	PCDHGB3	50.8533	-4.0952	0.892473	-4.5886	4.46232e-06	0.000130232		ENSG00000184840	TMED9	5481.78	2.74906	0.598907	4.59013	4.42976e-06	0.000120523		Trip11__chr12	-2.5414	0.000523668
ENSG00000253537	PCDHGA7	51.466	-4.11269	0.886874	-4.63729	3.5301e-06	0.000107571		ENSG00000145916	RMND5B	1347.98	2.08236	0.714648	2.91382	0.00357033	0.0266658		Erdr1__chrY	-2.54324	0.000198928
ENSG00000253953	PCDHGB4	60.9064	-4.06137	0.843365	-4.81567	1.46704e-06	5.41554e-05		ENSG00000145912	NHP2	1917.55	2.70955	0.729106	3.71626	0.000202191	0.0028424		Ylpm1__chr12	-2.54407	0.000452221
ENSG00000253767	PCDHGA8	88.6381	-3.24212	0.784773	-4.13129	3.60734e-05	0.000715298		ENSG00000197451	HNRNPAB	789.266	1.9242	0.673261	2.85803	0.00426279	0.030474		Wdr81__chr11	-2.54689	0.00492472
ENSG00000276547	PCDHGB5	54.8881	-3.78001	0.8552	-4.42003	9.8685e-06	0.000248996		ENSG00000175309	PHYKPL	302.857	-1.92773	0.749239	-2.57291	0.0100847	0.0583086		Slc39a10__chr1	-2.55354	0.0373928
ENSG00000261934	PCDHGA9	52.9448	-3.65496	0.872008	-4.19143	2.77198e-05	0.000573894		ENSG00000161011	SQSTM1	23507.7	3.00933	0.921695	3.265	0.00109465	0.0107967		Rbm38__chr2	-2.55409	0.0303448
ENSG00000253305	PCDHGB6	79.2519	-3.194	0.838204	-3.81053	0.00013867	0.00207094		ENSG00000161010	MRNIP	11498.3	2.55546	0.917555	2.78508	0.0053515	0.0360022		Vasp__chr7	-2.55656	0.028808
ENSG00000253846	PCDHGA10	71.0531	-4.12415	0.868745	-4.74725	2.06197e-06	7.09153e-05		ENSG00000196670	ZFP62	46.2066	3.21119	1.1882	2.70256	0.00688082	0.0435889		Alkbh2__chr5	-2.56255	0.0194712
ENSG00000254122	PCDHGB7	52.551	-4.14411	0.890908	-4.65156	3.29436e-06	0.000101618		ENSG00000204628	RACK1	7857.25	2.48442	0.583263	4.25952	2.04862e-05	0.000429622		Slc25a37__chr14	-2.56273	9.92e-07
ENSG00000253873	PCDHGA11	51.0969	-4.1023	0.89206	-4.59868	4.25182e-06	0.000125413		ENSG00000137265	IRF4	29.7319	-4.2592	1.5235	-2.79567	0.00517919	0.0351983		Rn45s__chr17	-2.57081	0.0018531
ENSG00000253159	PCDHGA12	50.8533	-4.0952	0.892473	-4.5886	4.46232e-06	0.000130232		ENSG00000112699	GMDS	570.477	4.40336	0.665808	6.61356	3.75179e-11	4.84042e-09		Mug1__chr6	-2.57327	0.00223257
ENSG00000240184	PCDHGC3	61.2395	-4.21496	0.874333	-4.82077	1.43008e-06	5.32728e-05		ENSG00000021355	SERPINB1	449.03	1.7102	0.741668	2.30589	0.021117	0.0990993		Zfp324__chr7	-2.57412	0.0273747
ENSG00000242419	PCDHGC4	50.8533	-4.0952	0.892473	-4.5886	4.46232e-06	0.000130232		ENSG00000137267	TUBB2A	1335.83	3.11371	0.627772	4.95993	7.05169e-07	2.64199e-05		Spice1__chr16	-2.57427	0.00942782
ENSG00000240764	PCDHGC5	52.3851	-4.13855	0.879617	-4.70494	2.53938e-06	8.2702e-05		ENSG00000137285	TUBB2B	942.209	3.84572	0.685446	5.61053	2.01706e-08	1.27545e-06		Mllt10__chr2	-2.57525	7.38e-06
ENSG00000113555	PCDH12	10.4708	-5.55365	2.41033	-2.3041	0.0212169	0.0975625		ENSG00000219607	PPP1R3G	184.474	-2.32037	0.782039	-2.96708	0.00300643	0.0234505		Mcoln1__chr8	-2.57836	0.00129045
ENSG00000113580	NR3C1	246.912	-3.14896	0.665495	-4.73176	2.22584e-06	7.49927e-05		ENSG00000124491	F13A1	44.7883	-8.13632	1.91166	-4.25614	2.07983e-05	0.000433243		Mbnl3__chrX	-2.57981	0.012435
ENSG00000275740	AC091959.3	121.519	-2.28132	0.757829	-3.01034	0.00260957	0.0207776		ENSG00000124782	RREB1	585.379	-3.30618	0.647864	-5.1032	3.33951e-07	1.40225e-05		Trim8__chr19	-2.57984	1.44e-06
ENSG00000091009	RBM27	141.016	-2.53035	0.688531	-3.67501	0.000237844	0.00322382		ENSG00000096696	DSP	606.761	-1.83709	0.652869	-2.81387	0.00489492	0.0336668		Sass6__chr3	-2.58104	0.0461044
ENSG00000173210	ABLIM3	279.621	-3.46301	1.05411	-3.28524	0.00101896	0.0101571		ENSG00000265818	EEF1E1-BLOC1S5	262.467	4.36263	0.744539	5.85951	4.64245e-09	3.67673e-07		Baz2b__chr2	-2.58259	0.0016334
ENSG00000182578	CSF1R	50.4944	-9.11777	1.97536	-4.61574	3.91689e-06	0.000116781		ENSG00000124802	EEF1E1	495.75	4.49418	0.676185	6.64638	3.00383e-11	3.97151e-09		Arid4b__chr13	-2.58395	4.14e-05
ENSG00000019582	CD74	840.987	-3.59798	1.05547	-3.40889	0.000652276	0.00717504		ENSG00000111843	TMEM14C	1067.47	2.45177	0.626677	3.91233	9.14094e-05	0.00149374		Prpf4b__chr13	-2.58397	1.03e-05
ENSG00000164587	RPS14	5091.75	2.30062	0.705629	3.26038	0.00111265	0.010888		ENSG00000137210	TMEM14B	1148.02	1.9955	0.693124	2.879	0.00398941	0.0289445		E4f1__chr17	-2.59054	0.0437315
ENSG00000171992	SYNPO	187.238	-4.68164	0.918949	-5.09455	3.49566e-07	1.68421e-05		ENSG00000272162	AL024498.2	294.239	2.02241	0.789279	2.56236	0.0103965	0.0594226		5031439G07Rik__chr15	-2.59078	0.00189481
ENSG00000256235	SMIM3	41.2375	4.65269	1.70802	2.72402	0.00644921	0.0409298		ENSG00000095951	HIVEP1	111.635	-3.05394	0.850882	-3.58915	0.000331757	0.00421896		Myo18a__chr11	-2.59394	9.67e-05
ENSG00000211445	GPX3	12490.2	3.088	0.545456	5.66132	1.50214e-08	1.14751e-06		ENSG00000145990	GFOD1	113.156	-2.02966	0.873152	-2.32452	0.0200974	0.0958898		2410131K14Rik__chr5	-2.5949	0.0286639
ENSG00000145901	TNIP1	296.698	-1.71208	0.697378	-2.45503	0.0140875	0.0723669		ENSG00000124523	SIRT5	204.878	-1.81838	0.763397	-2.38196	0.0172207	0.0856645		Trim47__chr11	-2.60455	0.031724
ENSG00000275765	AC091982.4	25.2496	2.99545	1.02866	2.91198	0.00359146	0.0264368		ENSG00000050393	MCUR1	419.854	2.17222	0.708062	3.06784	0.00215611	0.0183086		Exosc2__chr2	-2.60672	0.0471273
ENSG00000145907	G3BP1	735.079	2.11059	0.857437	2.46151	0.0138355	0.0713601		ENSG00000124788	ATXN1	92.7793	-2.93044	0.941283	-3.11324	0.00185048	0.0162243		Lmf1__chr17	-2.6125	0.000290132
ENSG00000145850	TIMD4	65.38	-9.49689	1.73572	-5.47145	4.46369e-08	2.90175e-06		ENSG00000137177	KIF13A	79.7007	-3.57315	0.94362	-3.78664	0.000152695	0.00226817		Spata2__chr2	-2.61455	0.00746907
ENSG00000113282	CLINT1	472.185	-1.91973	0.604662	-3.17487	0.00149902	0.0136011		ENSG00000137393	RNF144B	62.0197	-5.70705	1.33536	-4.27379	1.92174e-05	0.000408287		Mum1__chr10	-2.6149	0.0276797
ENSG00000164611	PTTG1	128.124	4.59566	1.16013	3.96132	7.45355e-05	0.00125567		ENSG00000112293	GPLD1	285.315	-3.82162	0.721747	-5.29495	1.19046e-07	5.80641e-06		Dusp7__chr9	-2.61547	0.0352534
ENSG00000113643	RARS	470.809	2.67993	0.671018	3.99382	6.50173e-05	0.00113811		ENSG00000112312	GMNN	307.812	2.40282	0.866781	2.77212	0.00556924	0.037031		Rmi2__chr16	-2.61918	0.040837
ENSG00000043462	LCP2	54.5253	-7.72982	1.60892	-4.80435	1.55252e-06	5.66873e-05		ENSG00000111913	RIPOR2	46.2063	-3.88321	1.18176	-3.28596	0.00101636	0.0102006		Fos__chr12	-2.6202	0.0187016
ENSG00000094755	GABRP	17.5593	-2.93947	1.2779	-2.30024	0.0214347	0.0982368		ENSG00000079689	SCGN	229.29	4.05788	1.01812	3.98566	6.72925e-05	0.00116509		Mrc1__chr2	-2.62084	0.000883694
ENSG00000181163	NPM1	4772.63	3.25237	0.702041	4.63273	3.60878e-06	0.000109565		ENSG00000146039	SLC17A4	275.699	-5.04607	0.833155	-6.05658	1.39042e-09	1.30371e-07		Ppcdc__chr9	-2.62398	0.00357908
ENSG00000214357	NEURL1B	52.137	-6.71318	1.65542	-4.05527	5.00756e-05	0.000929567		ENSG00000197061	HIST1H4C	323.449	-5.91156	0.783503	-7.54504	4.52138e-14	1.09595e-11		Qtrt1__chr9	-2.62944	0.0288959
ENSG00000037241	RPL26L1	181.012	2.54893	0.645578	3.9483	7.87087e-05	0.00131113		ENSG00000180596	HIST1H2BC	51.4426	3.068	1.06469	2.88159	0.0039567	0.0287724		Ptprb__chr10	-2.63063	0.0044075
ENSG00000113739	STC2	20.3297	8.07211	2.02462	3.98698	6.69185e-05	0.00115673		ENSG00000180573	HIST1H2AC	893.709	3.83929	0.695241	5.52225	3.34687e-08	1.98308e-06		Pim1__chr17	-2.63225	8.7e-05
ENSG00000113742	CPEB4	154.175	-2.87949	0.866457	-3.32329	0.000889611	0.00912002		ENSG00000168298	HIST1H1E	72.2646	-9.60374	1.7925	-5.35774	8.42681e-08	4.44924e-06		mtNd3__chrM	-2.63302	2.25e-06
ENSG00000048162	NOP16	417.176	1.94856	0.724563	2.68929	0.00716037	0.0442241		ENSG00000274290	HIST1H2BE	24.4449	3.51795	1.44304	2.43788	0.0147735	0.0767609		Osbpl3__chr6	-2.63504	0.0221797
ENSG00000146066	HIGD2A	763.648	2.07009	0.71828	2.882	0.00395154	0.0283497		ENSG00000277075	HIST1H2AE	14.2954	6.56163	2.46574	2.66112	0.00778803	0.0482411		Fkbp3__chr12	-2.63693	0.0290564
ENSG00000160883	HK3	30.0894	-8.36858	1.83045	-4.57187	4.83402e-06	0.0001384		ENSG00000158406	HIST1H4H	28.4142	7.98735	2.09316	3.81592	0.000135675	0.00205154		C730027H18Rik__chr10	-2.63853	0.0348281
ENSG00000160867	FGFR4	960.29	3.48551	0.68812	5.06527	4.07831e-07	1.88844e-05		ENSG00000182952	HMGN4	91.0315	3.44458	0.96284	3.57752	0.000346872	0.00433535		Zcchc6__chr13	-2.64192	0.0331486
ENSG00000169228	RAB24	294.886	2.14237	0.629614	3.40267	0.000667315	0.00728247		ENSG00000276180	HIST1H4I	345.959	4.85875	0.743048	6.53895	6.19543e-11	7.57593e-09		Tle1__chr4	-2.64272	0.000141629
ENSG00000213347	MXD3	1497.9	2.29446	0.724528	3.16684	0.00154106	0.0139344		ENSG00000197903	HIST1H2BK	336.018	5.16265	0.777735	6.63805	3.17857e-11	4.16809e-09		Nktr__chr9	-2.65245	0.000645537
ENSG00000169230	PRELID1	1956.81	2.50626	0.81249	3.08466	0.00203785	0.017178		ENSG00000197153	HIST1H3J	14.3703	5.18514	2.20245	2.35426	0.0185597	0.0906811		Top3a__chr11	-2.65466	0.0319061
ENSG00000169223	LMAN2	2512.95	2.69247	0.746896	3.60487	0.000312306	0.00404777		ENSG00000278677	HIST1H2AM	14.3703	5.18514	2.20245	2.35426	0.0185597	0.0906811		Zfp507__chr7	-2.65652	0.0306143
ENSG00000113758	DBN1	100.559	4.31817	1.05863	4.07903	4.52237e-05	0.00084997		ENSG00000137185	ZSCAN9	19.6668	4.96005	1.97518	2.51118	0.0120327	0.0661962		Serpina1d__chr12	-2.65922	0.000113298
ENSG00000196923	PDLIM7	120.621	2.33282	0.847809	2.75159	0.00593066	0.0384034		ENSG00000146112	PPP1R18	53.5373	-4.00428	1.35295	-2.95966	0.00307977	0.0238596		Nipbl__chr15	-2.67117	4.47e-05
ENSG00000184840	TMED9	3637.94	3.08288	0.668587	4.61104	4.00664e-06	0.000118816		ENSG00000196230	TUBB	13257.1	4.61262	0.629041	7.33278	2.25424e-13	4.45226e-11		Kctd2__chr11	-2.6713	0.000793386
ENSG00000145916	RMND5B	918.409	2.52181	0.761298	3.31251	0.000924619	0.00944388		ENSG00000137310	TCF19	48.6559	3.95273	1.38076	2.86271	0.00420036	0.0301739		Setd7__chr3	-2.67512	0.0176785
ENSG00000145912	NHP2	1291.85	3.10448	0.789067	3.93436	8.34175e-05	0.00137457		ENSG00000204520	MICA	405.222	2.39505	0.66119	3.62233	0.000291961	0.00381601		Soat2__chr15	-2.68556	0.0489878
ENSG00000197451	HNRNPAB	596.503	1.68714	0.651737	2.58868	0.00963436	0.0548827		ENSG00000227507	LTB	31.2976	-5.08271	1.81992	-2.79282	0.00522512	0.0353599		N4bp2l2__chr5	-2.69262	1.94e-22
ENSG00000175309	PHYKPL	246.911	-1.83862	0.618324	-2.97356	0.00294368	0.0226333		ENSG00000204482	LST1	15.9091	-6.97184	2.427	-2.87262	0.00407084	0.0294157		Gimap8__chr6	-2.69543	0.0254654
ENSG00000113240	CLK4	101.923	-1.62452	0.68844	-2.35971	0.0182891	0.087929		ENSG00000204472	AIF1	70.7859	-7.18229	1.41217	-5.08598	3.65724e-07	1.52297e-05		Mb21d1__chr9	-2.69982	0.0127052
ENSG00000161011	SQSTM1	16425.8	3.39049	1.14209	2.96868	0.00299082	0.0229046		ENSG00000204435	CSNK2B	2215.17	2.73463	0.606319	4.51021	6.47628e-06	0.000165243		Eif2ak2__chr17	-2.70366	0.00231874
ENSG00000161010	MRNIP	8411.27	2.77614	1.10736	2.507	0.0121761	0.064985		ENSG00000263020	AL662899.3	1811.64	2.71987	0.604002	4.50309	6.69738e-06	0.000170613		Abcc4__chr14	-2.70645	0.00101487
ENSG00000113303	BTNL8	48.4041	9.31111	1.61972	5.7486	8.9984e-09	7.45371e-07		ENSG00000213719	CLIC1	3452.06	3.33633	0.665702	5.01174	5.39406e-07	2.12067e-05		Dio1__chr4	-2.70654	0.00089919
ENSG00000204628	RACK1	5403.1	2.60246	0.741103	3.51161	0.000445405	0.00535647		ENSG00000204392	LSM2	282.009	2.00668	0.763114	2.62959	0.00854879	0.0516869		Btbd7__chr12	-2.71568	0.0186876
ENSG00000112699	GMDS	398.897	3.51771	1.26533	2.78008	0.00543456	0.0360355		ENSG00000204371	EHMT2	293.546	2.2999	0.742627	3.09698	0.00195505	0.0169614		Parp10__chr15	-2.71627	0.0164591
ENSG00000137267	TUBB2A	1004.7	2.50199	0.859355	2.91148	0.00359727	0.026456		ENSG00000204356	NELFE	608.915	2.47808	0.765866	3.23565	0.00121365	0.0117246		Trim56__chr5	-2.72066	0.0383571
ENSG00000137285	TUBB2B	641.855	3.88094	0.821535	4.72402	2.31231e-06	7.69701e-05		ENSG00000204344	STK19	271.386	-2.01233	0.696048	-2.89108	0.00383924	0.0281357		Sugp2__chr8	-2.72263	0.00883906
ENSG00000112739	PRPF4B	247.282	-2.00093	0.767575	-2.60681	0.00913892	0.0527126		ENSG00000244731	C4A	4746.78	-4.84374	0.598226	-8.09684	5.64063e-16	1.84161e-13		Ap5z1__chr5	-2.72323	0.00912618
ENSG00000198721	ECI2	1029.65	1.48626	0.634777	2.34139	0.0192123	0.0911772		ENSG00000224389	C4B	4812.05	-4.88233	0.591822	-8.24966	1.5885e-16	5.6473e-14		Clasp1__chr1	-2.73078	0.00445913
ENSG00000112799	LY86	18.7253	-7.68428	2.20986	-3.47728	0.000506534	0.00593415		ENSG00000231852	CYP21A2	72.6317	-4.12322	1.21368	-3.39727	0.000680608	0.00736198		Slfn5__chr11	-2.73101	0.00284473
ENSG00000124782	RREB1	282.375	-2.2338	0.604341	-3.69625	0.000218805	0.00302261		ENSG00000168477	TNXB	43.7848	-5.95974	1.46541	-4.06694	4.76337e-05	0.00087692		Mup3__chr4	-2.73119	0.0150935
ENSG00000111846	GCNT2	54.5052	-2.62809	0.925954	-2.83825	0.00453621	0.0315026		ENSG00000204287	HLA-DRA	517.635	-12.4884	4.20739	-2.9682	0.00299549	0.0233993		2210018M11Rik__chr7	-2.73184	0.00723921
ENSG00000111843	TMEM14C	741.177	2.5197	0.734687	3.42963	0.000604408	0.00680837		ENSG00000198502	HLA-DRB5	179.024	-7.68033	1.28732	-5.96613	2.42945e-09	2.10121e-07		Mup20__chr4	-2.732	0.0320688
ENSG00000137210	TMEM14B	817.997	2.1654	0.772121	2.80448	0.00503978	0.0341975		ENSG00000196126	HLA-DRB1	366.833	-7.79835	1.04149	-7.48769	7.00942e-14	1.62517e-11		Nxf1__chr19	-2.73291	0.000121633
ENSG00000272162	AL024498.2	204.37	2.3588	0.817471	2.88549	0.00390806	0.0281062		ENSG00000196735	HLA-DQA1	50.8311	-6.4063	1.47843	-4.33316	1.46982e-05	0.000327041		Zc2hc1a__chr3	-2.73792	0.029141
ENSG00000095951	HIVEP1	152.428	-3.65502	0.949446	-3.84964	0.000118293	0.00182582		ENSG00000179344	HLA-DQB1	107.054	-6.11008	1.25192	-4.88057	1.0578e-06	3.68684e-05		Bach2__chr4	-2.73896	0.00542633
ENSG00000145979	TBC1D7	140.476	2.50581	1.02154	2.45296	0.0141686	0.0726484		ENSG00000237541	HLA-DQA2	25.0931	-8.08416	2.11974	-3.81375	0.000136871	0.00206378		Snhg11__chr2	-2.73932	0.0480549
ENSG00000124523	SIRT5	154.619	-1.66717	0.665783	-2.50407	0.0122774	0.0653363		ENSG00000232629	HLA-DQB2	17.4234	-4.01175	1.70723	-2.34986	0.0187805	0.0913112		Cd3eap__chr7	-2.74008	0.043912
ENSG00000124788	ATXN1	64.0518	-2.50586	0.984243	-2.54598	0.0108973	0.0598556		ENSG00000204264	PSMB8	230.185	-2.00154	0.85395	-2.34387	0.019085	0.0924378		Bdnf__chr2	-2.74149	0.00859599
ENSG00000112183	RBM24	6.47258	6.42356	2.44257	2.62984	0.00854259	0.0501008		ENSG00000240065	PSMB9	172.47	-2.50497	0.945316	-2.64987	0.00805216	0.0493368		Fam109a__chr5	-2.7437	0.00590252
ENSG00000137177	KIF13A	38.3576	-2.52494	1.0785	-2.34116	0.0192237	0.0911794		ENSG00000231389	HLA-DPA1	289.86	-6.83129	1.325	-5.15568	2.52711e-07	1.13884e-05		Cars__chr7	-2.74375	0.030831
ENSG00000137393	RNF144B	106.316	-6.1785	1.30682	-4.72788	2.26872e-06	7.56713e-05		ENSG00000223865	HLA-DPB1	191.429	-5.59785	1.36643	-4.09671	4.19068e-05	0.000788736		mtCytb__chrM	-2.7457	2.72e-09
ENSG00000146038	DCDC2	60.793	4.03767	1.07401	3.75945	0.000170288	0.00246539		ENSG00000204228	HSD17B8	362.131	-1.98689	0.744738	-2.6679	0.00763271	0.0474022		Iqcc__chr4	-2.74577	0.0153868
ENSG00000112312	GMNN	193.422	2.81214	1.20809	2.32775	0.0199253	0.0934426		ENSG00000231500	RPS18	5165.52	1.90541	0.641573	2.9699	0.00297898	0.0232931		Acin1__chr14	-2.74663	5.56e-05
ENSG00000079689	SCGN	139.831	4.37166	1.39672	3.12996	0.00174832	0.0153425		ENSG00000112514	CUTA	2578.61	1.66478	0.677083	2.45875	0.0139422	0.0736193		Dhx57__chr17	-2.74831	0.00893302
ENSG00000146039	SLC17A4	129.848	-3.56206	0.914873	-3.8935	9.88086e-05	0.00157799		ENSG00000161896	IP6K3	25.2595	-8.09871	2.12018	-3.81982	0.000133547	0.00202128		Ankhd1__chr18	-2.75313	3.5e-07
ENSG00000124568	SLC17A1	118.753	-3.54675	1.0227	-3.46803	0.00052428	0.00607486		ENSG00000137309	HMGA1	287.299	2.34695	0.775388	3.0268	0.00247156	0.0203604		Frmd6__chr12	-2.75793	0.0065837
ENSG00000112337	SLC17A2	196.451	-2.78409	1.02556	-2.7147	0.0066336	0.0417642		ENSG00000270800	RPS10-NUDT3	3230.79	2.12181	0.589677	3.59826	0.000320355	0.0041066		Arid4a__chr12	-2.76156	0.000334987
ENSG00000124610	HIST1H1A	13.0596	-7.16475	2.58385	-2.77289	0.00555601	0.0365774		ENSG00000124614	RPS10	3463.51	2.07964	0.588721	3.53246	0.000411705	0.00500111		Spata5__chr3	-2.76269	0.0258914
ENSG00000197061	HIST1H4C	181.329	-5.19527	1.00603	-5.16412	2.4157e-07	1.22089e-05		ENSG00000196821	C6orf106	467.482	-2.29077	0.650248	-3.52292	0.000426827	0.00512912		Pmaip1__chr18	-2.7628	0.026876
ENSG00000180573	HIST1H2AC	765.604	1.83543	0.568526	3.22841	0.00124481	0.0118935		ENSG00000124562	SNRPC	1790.15	2.72901	0.768249	3.55225	0.000381956	0.00468959		Brd1__chr15	-2.76823	8.4e-07
ENSG00000168298	HIST1H1E	35.8739	-8.63049	1.7334	-4.97893	6.39371e-07	2.75295e-05		ENSG00000023892	DEF6	23.3646	-4.6251	1.62736	-2.84208	0.004482	0.0316569		Ino80d__chr1	-2.76877	0.00313375
ENSG00000274290	HIST1H2BE	14.8332	5.82639	1.60588	3.62816	0.000285446	0.0037465		ENSG00000198755	RPL10A	1959.51	1.9903	0.600751	3.31303	0.000922927	0.00942824		H2-Ab1__chr17	-2.76932	0.0348412
ENSG00000158406	HIST1H4H	18.8225	5.78659	1.78339	3.24471	0.0011757	0.0113311		ENSG00000112081	SRSF3	805.153	1.63836	0.619732	2.64366	0.00820159	0.0499844		Rprd1b__chr2	-2.77139	0.00305071
ENSG00000182952	HMGN4	70.0208	2.2578	0.799123	2.82534	0.00472302	0.0325116		ENSG00000124762	CDKN1A	1332.68	1.98255	0.767325	2.58372	0.00977424	0.0569856		Abcg1__chr17	-2.77374	0.0334186
ENSG00000196787	HIST1H2AG	36.8	2.61341	0.992666	2.63271	0.00847059	0.0498286		ENSG00000137168	PPIL1	426.65	3.54355	0.683786	5.18225	2.19221e-07	1.00779e-05		Sbf1__chr15	-2.78026	0.00474621
ENSG00000276180	HIST1H4I	233.491	4.29772	0.782218	5.49427	3.9232e-08	2.63299e-06		ENSG00000137409	MTCH1	1247.69	1.77265	0.615889	2.87819	0.00399959	0.0290052		mtAtp6__chrM	-2.78077	8.6e-09
ENSG00000197903	HIST1H2BK	229.32	4.15588	0.680234	6.1095	9.99461e-10	1.16677e-07		ENSG00000137193	PIM1	134.187	-2.02447	0.840461	-2.40876	0.0160067	0.0812681		Nlrp12__chr7	-2.78479	0.0242798
ENSG00000275221	HIST1H2AK	6.22139	6.34476	2.46127	2.57784	0.00994211	0.0561752		ENSG00000124767	GLO1	2419.44	2.75517	0.702214	3.92354	8.72575e-05	0.00143912		St3gal6__chr16	-2.78531	0.0337464
ENSG00000274641	HIST1H2BO	10.9778	6.13717	1.88425	3.25709	0.00112559	0.0109741		ENSG00000124602	UNC5CL	116.852	-5.32617	0.974107	-5.46774	4.55804e-08	2.61361e-06		Mtg1__chr7	-2.78915	0.0111771
ENSG00000204632	HLA-G	204.209	2.75429	0.805749	3.4183	0.000630142	0.00702007		ENSG00000124593	AL365205.1	1942.86	2.56215	0.668623	3.83198	0.000127115	0.0019423		Zfp788__chr7	-2.79493	0.00173196
ENSG00000206503	HLA-A	2972.14	2.35495	0.758956	3.10288	0.00191649	0.0164263		ENSG00000214736	TOMM6	1919.1	2.64744	0.666779	3.97049	7.1726e-05	0.00122202		Aatf__chr11	-2.80155	0.0223433
ENSG00000137343	ATAT1	32.7438	2.51218	0.9569	2.62533	0.00865657	0.050653		ENSG00000024048	UBR2	113.515	-2.10716	0.828235	-2.54416	0.010954	0.061575		Mettl6__chr14	-2.80201	0.000875659
ENSG00000146112	PPP1R18	64.6876	-3.41149	1.17345	-2.90723	0.00364644	0.0266639		ENSG00000124659	TBCC	111.061	2.57976	0.862721	2.99026	0.00278742	0.0220988		Abcd4__chr12	-2.80284	0.0445269
ENSG00000196230	TUBB	9366.69	3.45124	0.710132	4.86	1.17384e-06	4.57853e-05		ENSG00000124713	GNMT	434.537	-5.76936	1.21894	-4.73309	2.21125e-06	6.88242e-05		Lipc__chr9	-2.80645	1.61e-05
ENSG00000204482	LST1	37.0356	-8.67416	1.75822	-4.93349	8.07734e-07	3.38126e-05		ENSG00000112640	PPP2R5D	1087.16	1.72691	0.667428	2.58742	0.0096699	0.0565639		Tbx3__chr5	-2.80755	0.00549764
ENSG00000204472	AIF1	121.695	-7.72582	1.19409	-6.47003	9.79831e-11	1.50395e-08		ENSG00000124733	MEA1	1135.66	2.04909	0.667228	3.07105	0.00213307	0.0181805		Rft1__chr14	-2.80813	0.0356438
ENSG00000204444	APOM	2718.64	3.02384	0.947807	3.19035	0.00142098	0.0130865		ENSG00000124702	KLHDC3	738.531	2.22133	0.630136	3.52517	0.000423214	0.00509449		Baz2a__chr10	-2.80934	7.36e-07
ENSG00000204435	CSNK2B	1612.26	2.35447	0.5797	4.06153	4.87523e-05	0.000907033		ENSG00000112658	SRF	63.1214	-3.16119	1.04737	-3.01823	0.00254254	0.0207489		E330033B04Rik__chr15	-2.80954	0.027418
ENSG00000263020	AL662899.3	1282.8	2.53866	0.574565	4.4184	9.94334e-06	0.000250503		ENSG00000137204	SLC22A7	2288.61	-5.92009	0.653755	-9.05552	1.35922e-19	6.58936e-17		Fam160a1__chr3	-2.81085	0.0290196
ENSG00000213719	CLIC1	2270.94	3.5331	0.737651	4.78966	1.67063e-06	5.94641e-05		ENSG00000146215	CRIP3	216.441	-3.03131	0.764715	-3.96397	7.37123e-05	0.00124525		Tnks__chr8	-2.81435	0.0287585
ENSG00000255152	MSH5-SAPCD1	21.9653	4.0503	1.52941	2.64827	0.00809044	0.0482603		ENSG00000137207	YIPF3	2326.4	2.98318	0.596527	5.00092	5.70584e-07	2.22639e-05		1700008J07Rik__chr7	-2.81829	0.0272484
ENSG00000204371	EHMT2	201.546	2.4357	0.872215	2.79255	0.00522944	0.0351535		ENSG00000112715	VEGFA	347.817	-3.65249	0.689006	-5.3011	1.15107e-07	5.6487e-06		Cpeb4__chr11	-2.81896	0.0362303
ENSG00000204356	NELFE	420.187	2.67004	0.784433	3.40379	0.000664577	0.00725737		ENSG00000096384	HSP90AB1	9827.17	2.67192	0.680822	3.92456	8.68901e-05	0.00143602		Myof__chr19	-2.8252	0.0335974
ENSG00000204344	STK19	207.836	-1.72418	0.653895	-2.63678	0.00836973	0.0494106		ENSG00000157593	SLC35B2	1059.23	2.20409	0.714017	3.08688	0.00202266	0.0174252		Deptor__chr15	-2.8277	5.26e-05
ENSG00000244731	C4A	4249.97	-4.74238	0.645149	-7.35083	1.96982e-13	6.16108e-11		ENSG00000146070	PLA2G7	179.292	4.96931	0.885634	5.61102	2.01142e-08	1.27545e-06		Sgsm2__chr11	-2.82816	0.00318971
ENSG00000224389	C4B	4171.66	-4.73656	0.638162	-7.42219	1.152e-13	3.67244e-11		ENSG00000112818	MEP1A	1982.86	8.06126	1.06764	7.55057	4.33359e-14	1.0666e-11		Zcchc7__chr4	-2.82876	0.000829835
ENSG00000231852	CYP21A2	70.5923	-3.59794	1.07994	-3.33161	0.000863463	0.00892927		ENSG00000146072	TNFRSF21	157.067	3.09827	0.855174	3.62297	0.000291242	0.00381284		Fbxo18__chr2	-2.82987	0.00661924
ENSG00000168477	TNXB	67.1109	-6.65738	1.26681	-5.25524	1.47833e-07	8.25125e-06		ENSG00000146085	MUT	445.59	-1.90721	0.657695	-2.89984	0.00373352	0.0276011		9030624G23Rik__chr12	-2.83112	0.0363701
ENSG00000258388	PPT2-EGFL8	124.069	2.69719	0.708124	3.80892	0.000139574	0.00208069		ENSG00000031691	CENPQ	21.622	3.79794	1.57442	2.41228	0.0158529	0.0807178		Neat1__chr19	-2.83773	9.7e-05
ENSG00000204310	AGPAT1	135.447	2.61627	0.84369	3.10099	0.00192875	0.0164808		ENSG00000124490	CRISP2	69.752	9.18058	1.82848	5.02087	5.14373e-07	2.06239e-05		Diexf__chr1	-2.83978	0.0196174
ENSG00000204287	HLA-DRA	350.672	-11.9165	1.86594	-6.38629	1.69953e-10	2.40796e-08		ENSG00000170927	PKHD1	19.5673	-3.81697	1.62611	-2.3473	0.0189098	0.0917835		Cep120__chr18	-2.84676	0.0143187
ENSG00000198502	HLA-DRB5	209.107	-7.04764	1.62706	-4.33151	1.48091e-05	0.00034625		ENSG00000112118	MCM3	384.395	3.21164	0.737364	4.35557	1.32721e-05	0.000302029		Gcgr__chr11	-2.84719	1.06e-09
ENSG00000196126	HLA-DRB1	318.218	-6.94256	1.44845	-4.79309	1.64233e-06	5.88011e-05		ENSG00000170915	PAQR8	69.3167	3.0441	1.06628	2.85488	0.00430534	0.0306986		Rif1__chr2	-2.84805	0.00012254
ENSG00000179344	HLA-DQB1	56.3761	-4.01709	1.5623	-2.57126	0.0101329	0.0568919		ENSG00000096092	TMEM14A	902.835	3.322	0.662032	5.01788	5.22438e-07	2.07713e-05		Aplf__chr6	-2.84825	0.00179913
ENSG00000242574	HLA-DMB	400.273	4.29597	1.59776	2.68874	0.00717227	0.0442646		ENSG00000243955	GSTA1	3372.01	-1.57055	0.668557	-2.34916	0.018816	0.0914393		3110062M04Rik__chr6	-2.84834	0.00872545
ENSG00000248993	AL645941.2	154.492	3.85153	1.53067	2.51624	0.0118613	0.0636955		ENSG00000170899	GSTA4	585.363	2.07822	0.679963	3.05637	0.00224031	0.0187843		Csnk1g1__chr9	-2.85152	0.0022726
ENSG00000231389	HLA-DPA1	249.64	-4.53914	1.51037	-3.00531	0.00265311	0.0210232		ENSG00000146147	MLIP	77.2843	-2.42523	0.92519	-2.62133	0.0087587	0.0526575		Il22ra1__chr4	-2.85271	0.0179064
ENSG00000112514	CUTA	1606.44	2.56423	0.626148	4.09524	4.21726e-05	0.000808119		ENSG00000137251	TINAG	20.8727	7.86872	2.2146	3.55311	0.000380699	0.00467774		Arf5__chr6	-2.85288	0.04163
ENSG00000137309	HMGA1	183.865	3.15565	0.748298	4.2171	2.47463e-05	0.000527273		ENSG00000151914	DST	1087.72	-4.87237	0.703097	-6.92986	4.21247e-12	6.73911e-10		Zfp358__chr8	-2.85446	0.0202949
ENSG00000196821	C6orf106	449.623	-2.37176	0.670752	-3.53597	0.000406275	0.00501103		ENSG00000112208	BAG2	278.689	2.92583	0.844848	3.46315	0.000533899	0.00609429		Nphs1__chr7	-2.86199	0.0348964
ENSG00000124562	SNRPC	1242.6	2.74313	0.877924	3.12456	0.00178068	0.0155397		ENSG00000198225	FKBP1C	246.348	3.40326	0.746668	4.55793	5.166e-06	0.000136604		Gapvd1__chr2	-2.86992	0.000210534
ENSG00000124762	CDKN1A	743.884	4.03174	1.07708	3.7432	0.000181693	0.00259648		ENSG00000118482	PHF3	276.624	-1.83082	0.699842	-2.61605	0.00889523	0.053256		Ccnt1__chr15	-2.87172	0.00420012
ENSG00000137168	PPIL1	312.425	2.71684	1.06468	2.55179	0.0107171	0.0591206		ENSG00000168216	LMBRD1	1425.77	2.89336	0.604017	4.79019	1.66625e-06	5.44015e-05		Mapk15__chr15	-2.87394	0.0153401
ENSG00000137409	MTCH1	804.716	2.39737	0.62132	3.85851	0.000114078	0.00177399		ENSG00000156508	EEF1A1	59489.7	2.89179	0.581101	4.9764	6.47778e-07	2.4733e-05		Crebbp__chr16	-2.87509	0.000230255
ENSG00000137193	PIM1	131.88	-2.17058	0.761048	-2.8521	0.00434318	0.0305071		ENSG00000112695	COX7A2	2979.38	1.6647	0.613626	2.71289	0.00666988	0.0426478		Pex6__chr17	-2.8779	0.00206165
ENSG00000124767	GLO1	1609.64	3.17971	0.84731	3.75272	0.000174929	0.00250731		ENSG00000146247	PHIP	264.58	-2.64075	0.702898	-3.75694	0.000172001	0.00248795		Pla2g6__chr15	-2.88398	0.00837844
ENSG00000164626	KCNK5	32.0698	-2.43811	0.90585	-2.69152	0.00711273	0.0440118		ENSG00000118418	HMGN3	668.956	1.52102	0.6523	2.33178	0.019712	0.0946438		Rora__chr9	-2.88405	0.0326746
ENSG00000146122	DAAM2	83.8749	-2.57773	1.01857	-2.53074	0.0113822	0.0617417		ENSG00000118402	ELOVL4	14.7819	5.97962	2.48832	2.40308	0.0162578	0.0820481		Irak3__chr10	-2.88517	0.0486048
ENSG00000124602	UNC5CL	81.2057	-4.83883	1.2234	-3.95523	7.64605e-05	0.00127771		ENSG00000112742	TTK	20.4242	7.83549	2.22711	3.51823	0.00043443	0.00519822		Gpatch8__chr11	-2.88925	6.79e-05
ENSG00000096088	PGC	256.439	6.44618	1.43152	4.50301	6.69965e-06	0.000181471		ENSG00000005700	IBTK	247.232	-1.87084	0.706525	-2.64794	0.00809831	0.0495248		Sap130__chr18	-2.8903	0.00727353
ENSG00000124593	AL365205.1	1339.75	2.70564	0.699561	3.86763	0.0001099	0.0017252		ENSG00000135324	MRAP2	42.8309	3.84854	1.54024	2.49865	0.0124666	0.0679292		Palld__chr8	-2.89252	0.0246864
ENSG00000214736	TOMM6	1302.29	2.89608	0.726068	3.98872	6.64294e-05	0.00115188		ENSG00000135318	NT5E	950.348	3.49824	0.633296	5.52386	3.31639e-08	1.97233e-06		Hmga2-ps1__chr1	-2.89574	0.0497553
ENSG00000024048	UBR2	105.917	-2.14907	0.698005	-3.07888	0.00207783	0.0174048		ENSG00000188994	ZNF292	239.932	-3.02666	0.748127	-4.04565	5.21786e-05	0.000944291		Zfp612__chr8	-2.89737	0.000922318
ENSG00000124713	GNMT	161.528	-5.41883	1.13297	-4.78287	1.72807e-06	6.12099e-05		ENSG00000213204	AL049697.1	67.9364	3.008	0.981739	3.06396	0.00218431	0.0184794		Tyms__chr5	-2.89796	0.000880926
ENSG00000112640	PPP2R5D	753.601	2.02003	0.780744	2.58732	0.00967261	0.055025		ENSG00000164414	SLC35A1	114.471	2.18289	0.845503	2.58177	0.0098295	0.0572243		BC005537__chr13	-2.89828	0.00965316
ENSG00000124733	MEA1	747.76	2.52818	0.844913	2.99224	0.00276939	0.021706		ENSG00000083099	LYRM2	520.13	2.01149	0.644651	3.12028	0.00180678	0.0159519		Bmf__chr2	-2.89937	0.0434823
ENSG00000124702	KLHDC3	543.785	1.98	0.762455	2.59688	0.0094076	0.054018		ENSG00000112159	MDN1	132.332	-2.82881	0.81144	-3.48616	0.000489999	0.00570525		Zfp764__chr7	-2.90451	0.0496958
ENSG00000137204	SLC22A7	495.422	-3.44457	0.850766	-4.04879	5.14833e-05	0.000947366		ENSG00000132424	PNISR	461.239	-1.95909	0.656227	-2.98538	0.00283226	0.0223866		Phf1__chr17	-2.9049	0.0333919
ENSG00000137207	YIPF3	1536.77	3.38596	0.621269	5.45006	5.03515e-08	3.22269e-06		ENSG00000112237	CCNC	560.895	2.28861	0.642685	3.56101	0.000369424	0.00456374		Ptgs1__chr2	-2.90549	0.0169024
ENSG00000112715	VEGFA	285.579	-3.37892	0.772843	-4.37206	1.23078e-05	0.000296119		ENSG00000132429	POPDC3	64.4283	6.65312	1.97205	3.37371	0.000741617	0.00790432		1110028F11Rik__chr11	-2.91643	0.0302067
ENSG00000096384	HSP90AB1	7311.93	2.13831	0.579264	3.69142	0.000223003	0.00306782		ENSG00000085377	PREP	102.062	2.58777	0.858818	3.01318	0.00258528	0.0209626		G6pc3__chr11	-2.91761	0.0168705
ENSG00000157593	SLC35B2	677.27	2.95165	0.67429	4.37742	1.2009e-05	0.000290618		ENSG00000112320	SOBP	45.1403	-2.61915	1.11955	-2.33946	0.0193115	0.0932244		Akap17b__chrX	-2.92315	0.0128018
ENSG00000196284	SUPT3H	5.75875	5.15045	2.22796	2.31174	0.0207923	0.0961701		ENSG00000112335	SNX3	1216.92	1.7718	0.643759	2.75227	0.00591829	0.0388036		Tbc1d10b__chr7	-2.92671	0.0124018
ENSG00000146070	PLA2G7	129.6	3.25779	0.736409	4.42388	9.69418e-06	0.000245344		ENSG00000118689	FOXO3	245.483	-1.76787	0.70598	-2.50413	0.0122752	0.0671989		mt-Tg__chrM	-2.93281	0.00073851
ENSG00000112818	MEP1A	1265.26	12.0394	1.42626	8.44121	3.14076e-17	2.16935e-14		ENSG00000135535	CD164	1778.69	1.93214	0.649937	2.9728	0.00295092	0.0231076		Etaa1__chr11	-2.93335	0.000207985
ENSG00000069122	ADGRF5	27.8478	-5.00883	1.22475	-4.08967	4.31996e-05	0.000823126		ENSG00000135596	MICAL1	116.779	2.67658	0.898926	2.97753	0.00290583	0.0228327		Nxpe3__chr16	-2.95164	0.0283978
ENSG00000146072	TNFRSF21	92.4749	4.92865	1.20227	4.09944	4.14152e-05	0.00079645		ENSG00000123505	AMD1	211.381	2.06598	0.72909	2.83364	0.00460209	0.0322475		Ttc8__chr12	-2.95824	0.0281106
ENSG00000198087	CD2AP	125.822	-1.98859	0.654446	-3.03858	0.00237696	0.0192773		ENSG00000009413	REV3L	157.99	-3.24039	0.83143	-3.89737	9.72449e-05	0.00157462		Orai2__chr5	-2.96717	0.0390899
ENSG00000146085	MUT	419.445	-2.01439	0.768779	-2.62025	0.00878666	0.0512154		ENSG00000010810	FYN	94.5943	-3.08948	1.06796	-2.89287	0.00381734	0.0280523		Rdh18-ps__chr10	-2.96876	0.00233382
ENSG00000124490	CRISP2	44.67	9.20492	1.69688	5.42461	5.808e-08	3.61952e-06		ENSG00000074935	TUBE1	96.0828	-2.53985	0.896093	-2.83436	0.00459176	0.0321906		mtCo2__chrM	-2.97193	4.06e-11
ENSG00000096006	CRISP3	6.40357	6.38422	2.6799	2.38227	0.0172065	0.0841145		ENSG00000281613	AL365214.3	38.5219	3.7422	1.24558	3.00437	0.00266128	0.0213838		Trim39__chr17	-2.97328	0.00461665
ENSG00000170927	PKHD1	41.868	-4.936	1.20162	-4.10778	3.99482e-05	0.000772404		ENSG00000196591	HDAC2	423.989	2.49795	0.689856	3.62098	0.000293487	0.00383097		Arrdc3__chr13	-2.97426	1.54e-10
ENSG00000112118	MCM3	291.573	2.27395	0.978165	2.32471	0.0200873	0.0938555		ENSG00000111816	FRK	193.454	-2.35362	0.743868	-3.16403	0.00155602	0.0142491		Akap9__chr5	-2.97554	4.26e-07
ENSG00000096093	EFHC1	48.1013	3.00918	0.892142	3.37298	0.000743601	0.00794108		ENSG00000111817	DSE	163.406	2.15957	0.801491	2.69444	0.00705062	0.0444428		Ybey__chr10	-2.97759	0.00176378
ENSG00000096092	TMEM14A	664.658	2.59224	0.679211	3.81655	0.000135332	0.00203023		ENSG00000188820	FAM26F	34.6374	-8.51222	1.98661	-4.28479	1.82916e-05	0.000392263		Polr1b__chr2	-2.98014	0.0434819
ENSG00000170899	GSTA4	379.486	3.01203	1.01446	2.96909	0.00298687	0.022891		ENSG00000173626	TRAPPC3L	11.15	-6.78762	2.66061	-2.55115	0.0107367	0.0607163		mtNd2__chrM	-2.98566	1.18e-22
ENSG00000001084	GCLC	302.709	-1.62528	0.708657	-2.29346	0.0218213	0.0994586		ENSG00000025156	HSF2	39.4924	4.34743	1.49418	2.90959	0.00361907	0.0269543		Smpd2__chr10	-2.98662	0.00101709
ENSG00000137269	LRRC1	14.8833	4.6559	1.66624	2.79425	0.00520205	0.0350477		ENSG00000111897	SERINC1	1941.69	1.5201	0.59608	2.55016	0.0107674	0.0608229		Plekha2__chr8	-2.98815	0.0439364
ENSG00000137251	TINAG	13.5145	7.47624	1.90959	3.9151	9.03658e-05	0.00147006		ENSG00000135549	PKIB	160.443	4.71893	0.918815	5.13589	2.80811e-07	1.2308e-05		Snrnp48__chr13	-2.99027	4.32e-12
ENSG00000146151	HMGCLL1	12.3651	-7.0821	2.65415	-2.66831	0.00762328	0.0463011		ENSG00000172594	SMPDL3A	198.213	1.87365	0.743846	2.51887	0.0117732	0.0650819		Camsap1__chr2	-2.9911	0.000184323
ENSG00000151914	DST	922.451	-4.40127	0.780793	-5.63692	1.73115e-08	1.29852e-06		ENSG00000118520	ARG1	1261.76	-5.15292	1.0527	-4.89498	9.83154e-07	3.51082e-05		Ppp1r12a__chr10	-2.99343	9.03e-08
ENSG00000118482	PHF3	375.563	-2.52293	0.626475	-4.02719	5.64464e-05	0.00102152		ENSG00000112299	VNN1	213.091	-3.83005	1.3412	-2.85569	0.00429438	0.0306566		mtCo3__chrM	-2.99648	2.6e-10
ENSG00000168216	LMBRD1	1094.09	2.1384	0.610671	3.50172	0.000462257	0.00550096		ENSG00000093134	VNN3	66.7704	-5.79935	1.41765	-4.09081	4.29867e-05	0.000802453		2700054A10Rik__chr17	-2.99683	0.0347884
ENSG00000156508	EEF1A1	41364.5	2.7835	0.650704	4.27767	1.8886e-05	0.000424219		ENSG00000146409	SLC18B1	82.2859	3.14294	0.994097	3.1616	0.00156905	0.014352		Aspg__chr12	-2.99703	0.000484937
ENSG00000111799	COL12A1	16.1723	-4.52931	1.60847	-2.81591	0.00486389	0.0332079		ENSG00000112306	RPS12	6428.87	2.10597	0.619501	3.39946	0.000675181	0.00732308		Zfp428__chr7	-2.99741	0.0363892
ENSG00000112695	COX7A2	2098.31	1.82346	0.772153	2.36152	0.0182	0.0876274		ENSG00000118515	SGK1	395.629	-5.14959	0.731111	-7.04352	1.87448e-12	3.25956e-10		Irak1bp1__chr9	-2.99908	0.0148285
ENSG00000146247	PHIP	204.68	-2.3665	0.716686	-3.302	0.000959968	0.00970329		ENSG00000118514	ALDH8A1	391.558	-5.09793	0.958486	-5.31873	1.04492e-07	5.1915e-06		Gm5176__chr10	-3.00015	0.03727
ENSG00000118418	HMGN3	436.744	2.12581	0.759253	2.79987	0.00511234	0.0345766		ENSG00000029363	BCLAF1	384.628	-1.52302	0.661697	-2.30169	0.0213528	0.0999545		Bicc1__chr10	-3.00203	0.0366715
ENSG00000118402	ELOVL4	9.75349	6.99326	2.4236	2.88548	0.00390812	0.0281062		ENSG00000197442	MAP3K5	36.3029	-4.54769	1.51178	-3.00816	0.00262832	0.0212256		4930556M19Rik__chr15	-3.00299	0.00225212
ENSG00000146250	PRSS35	16.5667	-7.51177	3.0373	-2.47317	0.013392	0.0697236		ENSG00000027697	IFNGR1	489.643	2.49932	0.65104	3.83897	0.00012355	0.00189689		F830016B08Rik__chr18	-3.00322	0.000781453
ENSG00000135324	MRAP2	23.9983	8.30834	1.73402	4.79138	1.65636e-06	5.91755e-05		ENSG00000112378	PERP	2738.64	2.36256	0.712903	3.31401	0.000919697	0.00940147		Pmm1__chr15	-3.01418	0.0326563
ENSG00000135315	CEP162	42.2807	-3.6575	1.16108	-3.15008	0.00163225	0.014555		ENSG00000135540	NHSL1	180.408	-3.06265	0.756774	-4.04698	5.18832e-05	0.000941222		Cyp4b1__chr4	-3.02143	0.0074464
ENSG00000112837	TBX18	6.13082	6.34754	2.66129	2.38514	0.0170726	0.083608		ENSG00000146386	ABRACL	206.552	2.11261	0.861179	2.45316	0.0141606	0.0743139		Spopl__chr2	-3.02244	0.00685536
ENSG00000135318	NT5E	733.656	2.40756	0.640659	3.75795	0.000171313	0.00247374		ENSG00000009844	VTA1	1065.31	2.96879	0.630841	4.70609	2.52509e-06	7.56487e-05		Sema6a__chr18	-3.0255	0.00112358
ENSG00000135346	CGA	3224.39	12.9624	4.12419	3.14302	0.00167214	0.0148627		ENSG00000112414	ADGRG6	301.959	-1.99782	0.855909	-2.33415	0.019588	0.0941803		Nol12__chr15	-3.02869	0.00367984
ENSG00000188994	ZNF292	204.477	-2.98184	0.642774	-4.63902	3.50058e-06	0.000107065		ENSG00000010818	HIVEP2	51.1253	-2.81532	1.07747	-2.61289	0.00897812	0.0535159		mt-Tt__chrM	-3.02935	0.0450364
ENSG00000213204	AL049697.1	50.7909	2.30982	0.9197	2.51149	0.0120223	0.0644322		ENSG00000001036	FUCA2	3852.94	4.4718	0.608411	7.34997	1.98256e-13	3.96462e-11		Maml2__chr9	-3.02995	0.0228211
ENSG00000146281	PM20D2	100.133	1.99078	0.735575	2.70643	0.00680102	0.0425757		ENSG00000152818	UTRN	263.438	-3.07308	0.735866	-4.17614	2.96491e-05	0.000589225		Ano1__chr7	-3.03233	0.0252224
ENSG00000083099	LYRM2	374.048	1.92926	0.639959	3.01466	0.00257266	0.0205527		ENSG00000146414	SHPRH	119.094	-3.98957	0.916296	-4.35402	1.33665e-05	0.000302887		Ankrd24__chr10	-3.03461	0.0074834
ENSG00000112159	MDN1	194.712	-3.54507	0.888898	-3.98816	6.65867e-05	0.00115325		ENSG00000131023	LATS1	121.626	-2.43144	0.853254	-2.8496	0.00437736	0.031124		Pdgfb__chr15	-3.03607	0.0340967
ENSG00000118412	CASP8AP2	73.1525	-2.51165	0.779553	-3.22191	0.00127339	0.0120622		ENSG00000091831	ESR1	47.8114	-6.13796	2.13078	-2.88062	0.00396897	0.0288485		Lrit2__chr14	-3.03774	0.019137
ENSG00000112182	BACH2	29.9961	-6.29315	1.53305	-4.10498	4.04342e-05	0.000780301		ENSG00000131018	SYNE1	421.056	-1.59791	0.662779	-2.41092	0.0159122	0.0808908		Herc1__chr9	-3.04599	0.000598355
ENSG00000172469	MANEA	124.772	-2.5163	0.71736	-3.50772	0.000451965	0.00540565		ENSG00000120279	MYCT1	13.1698	-7.00385	2.53076	-2.76748	0.00564907	0.0374329		A230072C01Rik__chrX	-3.046	0.0206606
ENSG00000132424	PNISR	453.924	-2.09989	0.808343	-2.59778	0.00938298	0.0538953		ENSG00000049618	ARID1B	108.947	-2.91703	0.857287	-3.40263	0.000667405	0.00725843		S1pr2__chr9	-3.0464	0.0243117
ENSG00000112246	SIM1	6.52958	-6.15816	2.54846	-2.41642	0.0156739	0.0781489		ENSG00000272047	GTF2H5	582.989	1.55415	0.655338	2.37153	0.0177147	0.0876081		Ptpn23__chr9	-3.05454	0.0227079
ENSG00000112249	ASCC3	189.581	-1.62374	0.699639	-2.32083	0.0202959	0.0945659		ENSG00000112096	SOD2	1531.5	-1.62857	0.601258	-2.70861	0.00675661	0.0430646		F8__chrX	-3.05471	0.026077
ENSG00000187772	LIN28B	16.3635	7.75613	1.85669	4.1774	2.94855e-05	0.000605052		ENSG00000120437	ACAT2	2244.27	1.56787	0.656416	2.38853	0.0169161	0.0846227		Plekha4__chr7	-3.05804	0.0257171
ENSG00000272398	CD24	2099.46	3.8097	1.28096	2.97409	0.00293856	0.0226044		ENSG00000120438	TCP1	2257.72	2.27433	0.605892	3.75369	0.000174251	0.00251141		Cyp2d37-ps__chr15	-3.06742	6.83e-05
ENSG00000135587	SMPD2	55.3872	2.74366	0.860948	3.18679	0.00143861	0.0132268		ENSG00000112110	MRPL18	504.067	2.37215	0.662467	3.58078	0.000342572	0.00430178		Arl2__chr19	-3.07538	0.0299147
ENSG00000123505	AMD1	164.631	1.6188	0.690164	2.34553	0.0190001	0.0903864		ENSG00000175003	SLC22A1	1553.47	-10.6437	1.0366	-10.2679	9.82908e-25	7.86228e-22		Lhfpl2__chr13	-3.08054	0.00221891
ENSG00000009413	REV3L	87.3696	-2.34734	0.82507	-2.84502	0.00444089	0.0310226		ENSG00000198670	LPA	454.662	-2.65334	0.839773	-3.1596	0.00157988	0.0144263		Ccdc84__chr9	-3.08063	0.024717
ENSG00000281613	AL365214.3	23.6875	5.37314	1.31488	4.08641	4.38104e-05	0.000829995		ENSG00000112531	QKI	157.009	-2.94515	0.77705	-3.79017	0.000150543	0.00224664		Gpr157__chr4	-3.08316	0.0151261
ENSG00000251258	RFPL4B	40.9287	9.0679	1.74117	5.20792	1.9097e-07	1.00819e-05		ENSG00000249141	AL159163.1	651.192	2.87018	0.654369	4.38618	1.15361e-05	0.000268249		Nuak1__chr10	-3.08472	0.0403866
ENSG00000196591	HDAC2	307.657	2.20013	0.703652	3.12673	0.00176762	0.0154627		ENSG00000026297	RNASET2	1113.09	2.67097	0.62136	4.29859	1.71891e-05	0.000372704		Acaa1b__chr9	-3.08761	0.000233987
ENSG00000111816	FRK	167.416	-2.2626	0.972803	-2.32586	0.0200261	0.0936984		ENSG00000112486	CCR6	111.505	3.04843	0.848515	3.59266	0.000327314	0.00417574		Oit3__chr10	-3.09147	0.00610179
ENSG00000188820	FAM26F	13.0521	-7.16287	2.35165	-3.04589	0.00231993	0.0189726		ENSG00000112494	UNC93A	98.0808	-2.4652	0.926814	-2.65986	0.00781724	0.0483231		1700025G04Rik__chr1	-3.09213	0.0155017
ENSG00000153989	NUS1	216.092	-2.18601	0.709181	-3.08244	0.0020531	0.0172763		ENSG00000130396	AFDN	322.424	-2.49284	0.739163	-3.37252	0.000744842	0.00793341		Gon4l__chr3	-3.09775	0.00403828
ENSG00000111860	CEP85L	24.2707	-3.75623	1.37407	-2.73365	0.00626374	0.0400903		ENSG00000008018	PSMB1	3778.68	2.14047	0.595732	3.59301	0.000326879	0.00417351		Phgdh__chr3	-3.09946	0.0316623
ENSG00000135549	PKIB	111.294	3.6981	0.793385	4.66117	3.14421e-06	9.79729e-05		ENSG00000071994	PDCD2	563.227	2.23056	0.747069	2.98574	0.00282892	0.0223713		Zfp553__chr7	-3.10265	0.0299084
ENSG00000066651	TRMT11	73.3367	-2.37709	1.03097	-2.30568	0.0211284	0.0973175		ENSG00000177706	FAM20C	117.069	-3.95924	0.88104	-4.49383	6.99534e-06	0.000177356		mt-Rnr2__chrM	-3.10439	2.67e-10
ENSG00000146374	RSPO3	44.349	-8.93722	1.72781	-5.17257	2.30902e-07	1.18138e-05		ENSG00000157778	PSMG3	362.34	2.42419	0.752426	3.22183	0.00127376	0.012173		Gtpbp4__chr13	-3.10717	7.47e-11
ENSG00000152894	PTPRK	124.97	-1.89609	0.736493	-2.57449	0.0100389	0.0565075		ENSG00000225968	ELFN1	49.4725	-5.09413	1.35018	-3.77292	0.000161347	0.00235729		Zfhx4__chr3	-3.10934	0.0100256
ENSG00000196569	LAMA2	13.9406	-7.25719	2.1055	-3.44677	0.000567329	0.00648147		ENSG00000122687	MRM2	134.002	2.65808	0.951537	2.79346	0.00521469	0.035349		Fgd4__chr16	-3.11853	0.0169094
ENSG00000118507	AKAP7	74.1671	-1.66591	0.711656	-2.34089	0.0192379	0.0912202		ENSG00000174945	AMZ1	9.90511	-6.4677	2.78468	-2.3226	0.0202007	0.0962389		Gpatch2__chr1	-3.11929	0.000536709
ENSG00000118520	ARG1	1660.34	-5.42946	0.910275	-5.96463	2.45184e-09	2.5888e-07		ENSG00000075624	ACTB	67442.2	2.43591	0.583775	4.17268	3.01034e-05	0.000597261		Npr3__chr15	-3.12818	0.03822
ENSG00000112299	VNN1	660.068	-4.32196	1.29425	-3.33936	0.000839714	0.00876761		ENSG00000106305	AIMP2	411.133	1.95846	0.671545	2.91635	0.00354152	0.0265373		Slc29a3__chr10	-3.13212	0.0237286
ENSG00000093134	VNN3	43.9417	-3.88194	1.40489	-2.76317	0.00572436	0.0374626		ENSG00000164535	DAGLB	174.873	1.88808	0.765589	2.46618	0.0136564	0.0726273		Camk4__chr18	-3.13346	0.02955
ENSG00000146409	SLC18B1	59.7394	2.53913	0.984936	2.57797	0.00993835	0.0561752		ENSG00000136240	KDELR2	3383.06	2.03643	0.599683	3.39585	0.00068417	0.00739551		Sfrs18__chr4	-3.14124	0.000433955
ENSG00000118526	TCF21	21.5791	-7.8911	2.29609	-3.43675	0.00058873	0.0066708		ENSG00000106392	C1GALT1	303.319	1.63356	0.692642	2.35845	0.0183516	0.0898927		Smg9__chr7	-3.14164	0.0178718
ENSG00000118515	SGK1	185.069	-3.9426	1.05945	-3.72136	0.00019815	0.00278839		ENSG00000189043	NDUFA4	3529.26	1.65996	0.612012	2.71231	0.0066817	0.0426722		Abca8b__chr11	-3.14348	0.00161998
ENSG00000118514	ALDH8A1	553.54	-5.24837	0.889534	-5.90014	3.63197e-09	3.58376e-07		ENSG00000136261	BZW2	186.062	1.85896	0.775253	2.39787	0.0164905	0.0829116		Gm10653__chr9	-3.14398	0.00458855
ENSG00000135541	AHI1	168.377	-3.16652	0.843287	-3.75497	0.000173364	0.00249034		ENSG00000106537	TSPAN13	384.588	4.82845	0.806992	5.98326	2.18712e-09	1.95472e-07		mt-Ti__chrM	-3.14585	1.33e-05
ENSG00000135525	MAP7	106.231	-4.7356	0.871722	-5.43246	5.55819e-08	3.50335e-06		ENSG00000106541	AGR2	23745.3	9.17881	1.43802	6.38296	1.73697e-10	1.85254e-08		Fastkd1__chr2	-3.14716	0.0101831
ENSG00000197442	MAP3K5	18.3947	-3.88963	1.24652	-3.12038	0.00180615	0.0157333		ENSG00000229937	PRPS1L1	9.69635	6.72663	2.76286	2.43466	0.0149059	0.0771728		Slc2a4rg-ps__chr2	-3.15085	0.00144003
ENSG00000112378	PERP	1892.31	2.79893	0.78933	3.54596	0.000391188	0.0048794		ENSG00000136237	RAPGEF5	50.067	-5.79157	1.496	-3.87137	0.000108226	0.00171596		Arid5b__chr10	-3.15364	0.000396152
ENSG00000135540	NHSL1	211.156	-3.40693	0.62568	-5.44516	5.1759e-08	3.28739e-06		ENSG00000105889	STEAP1B	45.3418	5.16661	1.30218	3.96766	7.25828e-05	0.00123137		Mll5__chr5	-3.15487	1.17e-05
ENSG00000024862	CCDC28A	122.265	-2.52285	0.7435	-3.39321	0.000690792	0.00746497		ENSG00000196683	TOMM7	1268.59	1.40496	0.605104	2.32185	0.0202412	0.0964032		Nudt8__chr19	-3.15519	0.00750806
ENSG00000112406	HECA	37.3226	-2.37113	0.945897	-2.50675	0.0121846	0.0649917		ENSG00000136243	NUPL2	107.826	2.02378	0.839169	2.41165	0.0158807	0.0807692		Pfkp__chr13	-3.15948	0.0210244
ENSG00000009844	VTA1	723.098	3.05269	1.00739	3.0303	0.00244312	0.0197174		ENSG00000136235	GPNMB	109.509	-3.41151	1.00884	-3.38162	0.000720606	0.00770605		Plekha7__chr7	-3.1624	0.0214066
ENSG00000112414	ADGRG6	347.617	-2.10813	0.788884	-2.6723	0.00753342	0.0459123		ENSG00000070882	OSBPL3	49.6965	2.94531	1.18166	2.49252	0.0126839	0.0687162		Arglu1__chr8	-3.16414	7.72e-09
ENSG00000001036	FUCA2	2676.94	3.65579	0.682791	5.35419	8.59399e-08	5.16169e-06		ENSG00000172115	CYCS	1437.57	2.10973	0.602554	3.50131	0.000462982	0.00547839		5830473C10Rik__chr5	-3.17143	0.00594614
ENSG00000112419	PHACTR2	160.941	-2.19538	0.861694	-2.54775	0.010842	0.0596705		ENSG00000122566	HNRNPA2B1	3502.76	1.57283	0.600149	2.62073	0.00877423	0.0526915		Izumo4__chr10	-3.17203	0.0118731
ENSG00000152818	UTRN	169.162	-2.68277	0.670474	-4.00131	6.29939e-05	0.00110972		ENSG00000253293	HOXA10	10.909	6.91668	2.66425	2.59611	0.00942865	0.0555472		Ms4a6c__chr19	-3.17257	0.0410446
ENSG00000146414	SHPRH	97.5893	-3.88901	0.828658	-4.69314	2.69047e-06	8.66016e-05		ENSG00000106049	HIBADH	392.186	1.62715	0.706292	2.3038	0.0212341	0.0995323		Heatr3__chr8	-3.18068	0.00983418
ENSG00000203727	SAMD5	114.471	-3.02685	1.01411	-2.98474	0.00283821	0.0220991		ENSG00000106066	CPVL	420.178	4.04191	0.786238	5.14082	2.73538e-07	1.20221e-05		Slfn2__chr11	-3.18305	0.0226557
ENSG00000111961	SASH1	68.6751	-2.18294	0.829369	-2.63204	0.00848731	0.0499093		ENSG00000006625	GGCT	351.03	2.21201	0.700963	3.15566	0.00160133	0.0145775		Ttll4__chr1	-3.18311	0.0277382
ENSG00000055208	TAB2	102.821	-2.60356	0.71233	-3.65499	0.000257195	0.00343556		ENSG00000281039	AC005154.6	142.033	2.21683	0.83553	2.65321	0.00797314	0.0489988		Gdpd1__chr11	-3.18716	0.00754197
ENSG00000131023	LATS1	87.9012	-2.04862	0.795857	-2.57411	0.0100499	0.0565265		ENSG00000106105	GARS	1221.68	3.17157	0.740964	4.28033	1.86618e-05	0.000398209		Cnot3__chr7	-3.18906	0.00380881
ENSG00000131016	AKAP12	146.256	-1.93532	0.739975	-2.61539	0.00891257	0.051731		ENSG00000240583	AQP1	37.1082	-6.45919	1.72516	-3.7441	0.000181042	0.00258588		Tanc2__chr11	-3.18953	0.00293969
ENSG00000120279	MYCT1	24.4617	-8.07957	1.82471	-4.42788	9.5165e-06	0.000241585		ENSG00000122642	FKBP9	277.223	2.28897	0.693538	3.30042	0.0009654	0.00976262		Dll4__chr2	-3.19257	0.0168578
ENSG00000049618	ARID1B	80.3296	-2.51149	0.772059	-3.25298	0.00114201	0.0110708		ENSG00000010270	STARD3NL	133.619	2.4343	0.815463	2.98518	0.00283412	0.0223903		Phka2__chrX	-3.19646	0.004521
ENSG00000130340	SNX9	297.647	-1.75284	0.692398	-2.53155	0.0113559	0.0616799		ENSG00000122641	INHBA	55.9499	-6.6747	1.45868	-4.57585	4.7428e-06	0.000126882		Ift81__chr5	-3.19856	0.0125128
ENSG00000112096	SOD2	2461.22	-2.60626	0.65274	-3.9928	6.52976e-05	0.00114013		ENSG00000256646	AC010132.3	1895.48	1.95896	0.610558	3.20847	0.00133443	0.0125781		Agtrap__chr4	-3.19867	0.00197908
ENSG00000120438	TCP1	1782.58	1.68513	0.692674	2.43278	0.0149833	0.0757482		ENSG00000106588	PSMA2	2035.59	1.78839	0.608168	2.94062	0.00327561	0.0250592		Zfp451__chr1	-3.20403	0.0115138
ENSG00000112110	MRPL18	380.321	1.96837	0.695541	2.82998	0.0046551	0.0321531		ENSG00000106605	BLVRA	279.361	2.92395	0.719292	4.06504	4.80249e-05	0.000882092		Intu__chr3	-3.20749	0.0165788
ENSG00000146453	PNLDC1	18.9776	-7.71289	2.36353	-3.2633	0.00110124	0.0108147		ENSG00000136206	SPDYE1	68.245	-5.99096	1.24777	-4.80132	1.57621e-06	5.17786e-05		Eif2b5__chr16	-3.21108	5.16e-05
ENSG00000175003	SLC22A1	503.341	-9.15902	1.24811	-7.33829	2.16343e-13	6.64132e-11		ENSG00000106624	AEBP1	26.2355	-5.37478	2.10108	-2.55811	0.0105244	0.0598753		Pabpn1__chr14	-3.21145	9.28e-13
ENSG00000112531	QKI	199.419	-3.41645	0.687365	-4.97036	6.68304e-07	2.86265e-05		ENSG00000106628	POLD2	1291.97	1.55564	0.622645	2.49844	0.0124742	0.0679477		Bcl9l__chr9	-3.21461	0.00403835
ENSG00000060762	MPC1	1463.45	-2.62081	0.872793	-3.00279	0.00267519	0.0211577		ENSG00000136271	DDX56	802.431	2.79491	0.62786	4.45149	8.52777e-06	0.000207652		Polr2a__chr11	-3.21924	0.0155854
ENSG00000071242	RPS6KA2	43.7845	-2.43173	1.00387	-2.42237	0.0154198	0.0774822		ENSG00000158604	TMED4	689.386	2.03599	0.628742	3.2382	0.00120287	0.0116486		Ankrd12__chr17	-3.22103	0.00033098
ENSG00000249141	AL159163.1	408.557	4.24102	1.11052	3.81895	0.00013402	0.00201418		ENSG00000196262	PPIA	26377.5	3.18622	0.582397	5.47088	4.47805e-08	2.58113e-06		Mup9__chr4	-3.22623	0.0310858
ENSG00000026297	RNASET2	685.994	4.17357	1.04371	3.99878	6.36696e-05	0.00112044		ENSG00000136270	TBRG4	413.3	1.93448	0.662948	2.918	0.00352287	0.0264471		Lrrc17__chr5	-3.25021	0.0177074
ENSG00000112486	CCR6	73.6498	3.51219	1.14987	3.05441	0.00225505	0.0185795		ENSG00000122679	RAMP3	49.2215	-8.42683	1.86526	-4.51778	6.24918e-06	0.000159959		Lgals4__chr7	-3.25324	0.0117086
ENSG00000130396	AFDN	265.165	-2.1619	0.718741	-3.0079	0.00263056	0.0208945		ENSG00000136205	TNS3	287.518	-1.99375	0.688756	-2.89472	0.00379497	0.0279392		Zfp318__chr17	-3.25762	0.000284217
ENSG00000164488	DACT2	21.2381	4.60258	1.58801	2.89833	0.00375153	0.027264		ENSG00000185811	IKZF1	15.3271	-7.39001	2.40002	-3.07914	0.00207596	0.0178076		Acrbp__chr6	-3.25789	0.0281778
ENSG00000186340	THBS2	82.0493	-4.26378	1.70647	-2.4986	0.0124684	0.066056		ENSG00000106078	COBL	122.382	-1.98659	0.826054	-2.40492	0.0161761	0.0818423		Usp28__chr9	-3.25832	0.0075017
ENSG00000008018	PSMB1	2753.55	1.98033	0.850658	2.32799	0.0199125	0.0934426		ENSG00000132432	SEC61G	886.815	1.62283	0.626542	2.59013	0.00959395	0.0562212		Adcy9__chr16	-3.26118	0.00047953
ENSG00000071994	PDCD2	394.877	2.41079	0.915556	2.63314	0.00845996	0.0498014		ENSG00000146648	EGFR	341.125	-3.61416	0.952292	-3.79522	0.000147514	0.00220553		A730098P11Rik__chr16	-3.26296	0.00149948
ENSG00000177706	FAM20C	147.785	-4.39767	0.760973	-5.77901	7.51411e-09	6.52154e-07		ENSG00000146733	PSPH	664.316	3.18142	0.735706	4.32431	1.53011e-05	0.000336709		Mfap1a__chr2	-3.26394	0.00010434
ENSG00000146540	C7orf50	223.921	2.10623	0.678864	3.10258	0.00191843	0.0164265		ENSG00000146731	CCT6A	1467.58	3.00652	0.73329	4.10004	4.13077e-05	0.000779294		Pcf11__chr7	-3.26433	7.28e-06
ENSG00000164850	GPER1	105.828	-1.96975	0.732365	-2.68957	0.00715433	0.0442033		ENSG00000106153	CHCHD2	7703.14	2.77479	0.597537	4.64371	3.42205e-06	9.75863e-05		Gm20300__chr10	-3.28196	5.57e-06
ENSG00000157778	PSMG3	253.447	2.47643	0.718638	3.446	0.000568948	0.00649102		ENSG00000197008	ZNF138	15.8567	6.12848	2.12788	2.88008	0.0039757	0.0288786		Vps13c__chr9	-3.28457	0.0032386
ENSG00000146587	RBAK	85.584	-3.16963	0.794105	-3.99145	6.56707e-05	0.00114271		ENSG00000169919	GUSB	1037.43	1.66519	0.627611	2.65321	0.00797296	0.0489988		Btbd19__chr4	-3.30331	0.00225644
ENSG00000164638	SLC29A4	211.153	2.79796	0.753699	3.71231	0.000205376	0.00287059		ENSG00000158321	AUTS2	170.04	-5.91197	1.28992	-4.58321	4.57899e-06	0.000123741		Mup7__chr4	-3.30377	0.000726926
ENSG00000075624	ACTB	43998.6	3.01162	0.6849	4.39717	1.09671e-05	0.000270942		ENSG00000130305	NSUN5	372.761	2.25601	0.767566	2.93918	0.00329082	0.0251176		Tnip3__chr6	-3.30886	0.0360215
ENSG00000164535	DAGLB	119.005	2.1987	0.860844	2.55412	0.0106458	0.0589014		ENSG00000009950	MLXIPL	2656.31	-2.18596	0.812046	-2.69192	0.00710429	0.0446931		5031425E22Rik__chr5	-3.31037	0.0186581
ENSG00000106392	C1GALT1	226.386	1.5272	0.616322	2.47793	0.0132148	0.0689742		ENSG00000071462	BUD23	1129.51	2.61771	0.637001	4.10943	3.9664e-05	0.000754511		Srek1__chr13	-3.31037	6.13e-06
ENSG00000189043	NDUFA4	2445.81	1.82398	0.661879	2.75576	0.0058556	0.038066		ENSG00000165215	CLDN3	786.67	4.00521	0.72062	5.55801	2.72873e-08	1.66619e-06		Cdk8__chr5	-3.31101	0.000621079
ENSG00000136261	BZW2	129.807	1.93431	0.834382	2.31825	0.0204358	0.0949982		ENSG00000189143	CLDN4	1545.74	7.67243	0.788132	9.73496	2.13908e-22	1.48787e-19		Bbs1__chr19	-3.32164	0.0167542
ENSG00000106541	AGR2	15696.3	9.83989	1.28929	7.63201	2.31122e-14	8.91003e-12		ENSG00000049541	RFC2	196.119	2.46236	0.741317	3.32161	0.000895003	0.00920196		Map1b__chr13	-3.32202	0.0164795
ENSG00000106546	AHR	209.172	-1.66797	0.675184	-2.4704	0.0134963	0.0700684		ENSG00000158517	NCF1	28.1334	-3.36309	1.34927	-2.49253	0.0126835	0.0687162		5530601H04Rik__chrX	-3.32218	0.000936944
ENSG00000071189	SNX13	62.2179	-1.79377	0.744335	-2.4099	0.015957	0.0791447		ENSG00000170092	SPDYE5	67.5658	-5.40502	1.18846	-4.5479	5.41827e-06	0.000141405		Vmn2r55__chr7	-3.32372	0.000344541
ENSG00000229937	PRPS1L1	6.55633	5.34596	2.15371	2.48221	0.013057	0.0683226		ENSG00000127948	POR	10706.1	2.05286	0.670494	3.06172	0.00220071	0.0185887		Kcnk6__chr7	-3.32808	0.0170273
ENSG00000136237	RAPGEF5	45.5412	-5.83172	1.22322	-4.76751	1.86519e-06	6.53682e-05		ENSG00000146701	MDH2	4688.65	3.10167	0.602657	5.14666	2.65167e-07	1.18002e-05		Cers3__chr7	-3.33376	0.033872
ENSG00000156928	MALSU1	264.228	1.60787	0.652235	2.46517	0.0136949	0.0708334		ENSG00000106211	HSPB1	2209.81	1.78333	0.687801	2.5928	0.00951985	0.0558689		Setd1a__chr7	-3.33429	0.00108915
ENSG00000164548	TRA2A	158.509	-2.42016	0.685161	-3.53225	0.000412035	0.005052		ENSG00000185040	SPDYE16	94.4786	-4.3826	0.932772	-4.69847	2.62124e-06	7.80904e-05		E130102H24Rik__chr4	-3.34041	0.0349038
ENSG00000070882	OSBPL3	31.7382	3.12289	1.25773	2.48295	0.0130298	0.0682092		ENSG00000127951	FGL2	44.3321	-4.49885	1.31266	-3.42727	0.000609672	0.00675453		Srrm2__chr17	-3.34411	4.44e-12
ENSG00000172115	CYCS	1015.46	2.12708	0.804665	2.64343	0.008207	0.0486579		ENSG00000186088	GSAP	114.135	-2.08387	0.832579	-2.50291	0.0123177	0.0673702		Ankrd11__chr8	-3.3458	7.95e-07
ENSG00000122565	CBX3	849.624	1.58219	0.690385	2.29174	0.0219204	0.0997817		ENSG00000075223	SEMA3C	44.3363	3.82658	1.17211	3.26469	0.00109586	0.0108019		Phf20__chr2	-3.34793	3.48e-05
ENSG00000253293	HOXA10	7.04217	6.53896	2.30186	2.84073	0.00450109	0.0313633		ENSG00000170381	SEMA3E	69.0467	2.23635	0.950229	2.35348	0.0185984	0.0908232		Cps1__chr1	-3.35109	2.33e-06
ENSG00000106066	CPVL	292.181	3.44238	1.2569	2.73877	0.00616687	0.0396739		ENSG00000075213	SEMA3A	9.97396	6.64674	2.75617	2.41159	0.0158832	0.0807692		Taf1d__chr9	-3.3538	3.06e-06
ENSG00000180354	MTURN	74.0997	-2.95828	1.11833	-2.64526	0.00816271	0.0485168		ENSG00000005471	ABCB4	415.954	-2.00012	0.664726	-3.00893	0.00262168	0.0212041		Lpar1__chr4	-3.35915	0.00537569
ENSG00000180233	ZNRF2	57.9598	-4.4484	0.916647	-4.8529	1.2167e-06	4.72349e-05		ENSG00000085563	ABCB1	180.845	1.881	0.811564	2.31775	0.020463	0.0970553		4930503L19Rik__chr18	-3.36003	0.0304144
ENSG00000006625	GGCT	249.349	2.22182	0.815339	2.72502	0.0064297	0.0408571		ENSG00000075142	SRI	437.266	1.75218	0.693196	2.52769	0.0114816	0.0638454		Brd4__chr17	-3.36521	1.56e-07
ENSG00000281039	AC005154.6	98.841	2.37402	1.00588	2.36015	0.0182675	0.0878504		ENSG00000164647	STEAP1	270.201	3.61347	0.880652	4.10318	4.07515e-05	0.00077059		AY512931__chr8	-3.36609	0.0498772
ENSG00000106105	GARS	892.146	2.66222	0.964224	2.761	0.00576241	0.0376225		ENSG00000058091	CDK14	70.7263	-2.89328	0.980493	-2.95084	0.00316912	0.0244571		mtNd5__chrM	-3.36643	3.65e-19
ENSG00000250424	AC004691.2	41.5668	-4.56425	1.09545	-4.16655	3.09243e-05	0.000629768		ENSG00000127914	AKAP9	459.432	-2.81277	0.703593	-3.99772	6.39561e-05	0.00111822		Zfp157__chr5	-3.37335	0.0112047
ENSG00000240583	AQP1	171.437	-9.56657	1.43663	-6.65905	2.75602e-11	5.19166e-09		ENSG00000105852	PON3	2574.1	2.13926	0.704027	3.0386	0.00237678	0.0197321		Zfp566__chr7	-3.37356	0.0111097
ENSG00000122642	FKBP9	203.926	2.04284	0.65056	3.14013	0.00168873	0.0149781		ENSG00000105854	PON2	6996.67	4.25742	0.605415	7.03223	2.03264e-12	3.45938e-10		A730017L22Rik__chr2	-3.38564	0.000428517
ENSG00000164619	BMPER	51.6527	-5.91334	1.43182	-4.12995	3.62844e-05	0.000716909		ENSG00000005981	ASB4	107.996	4.93775	0.962487	5.1302	2.89442e-07	1.25829e-05		Zbtb7c__chr18	-3.38615	0.031728
ENSG00000010270	STARD3NL	97.0427	2.09639	0.76251	2.74933	0.00597168	0.0386388		ENSG00000158560	DYNC1I1	34.4211	7.12926	1.75361	4.06547	4.79353e-05	0.000881458		Mex3a__chr3	-3.38921	0.0307721
ENSG00000168303	MPLKIP	406.966	1.59417	0.62676	2.54351	0.0109745	0.0601003		ENSG00000196636	SDHAF3	403.969	3.80213	0.669833	5.67624	1.37688e-08	9.39567e-07		Cdc42ep3__chr17	-3.39016	0.0138731
ENSG00000122641	INHBA	40.9358	-6.31676	1.86383	-3.38913	0.000701142	0.00755711		ENSG00000164713	BRI3	240.406	-1.98966	0.707599	-2.81184	0.00492593	0.0337929		Rbm6__chr9	-3.39377	5.05e-06
ENSG00000256646	AC010132.3	1510.12	1.452	0.621871	2.3349	0.0195489	0.0922705		ENSG00000241685	ARPC1A	1772.35	3.24965	0.675302	4.81214	1.49321e-06	4.94584e-05		Mug-ps1__chr6	-3.39624	0.00491123
ENSG00000106605	BLVRA	175.866	3.88486	1.21395	3.20017	0.00137345	0.0127336		ENSG00000130429	ARPC1B	1006.48	2.67894	0.643802	4.16113	3.16676e-05	0.000621618		Gm3414__chr5	-3.40168	0.0116721
ENSG00000136206	SPDYE1	30.1515	-4.60305	1.27324	-3.61522	0.000300096	0.00390705		ENSG00000106245	BUD31	719.228	1.85271	0.629859	2.94146	0.00326664	0.0250166		Gata3__chr2	-3.40169	0.0095462
ENSG00000106624	AEBP1	28.9925	-6.73974	1.74442	-3.8636	0.000111727	0.00174726		ENSG00000106246	PTCD1	873.937	2.16819	0.622032	3.48566	0.000490931	0.00571194		Ccdc88a__chr11	-3.40393	0.00227246
ENSG00000106628	POLD2	825.265	2.30586	0.751332	3.06903	0.00214755	0.0178446		ENSG00000248919	ATP5J2-PTCD1	1187.69	2.89956	0.614398	4.71935	2.36598e-06	7.25144e-05		Pkp3__chr7	-3.40412	0.0132901
ENSG00000058404	CAMK2B	17.492	-4.33316	1.69728	-2.553	0.0106798	0.0589934		ENSG00000241468	ATP5J2	2627.38	2.64212	0.607711	4.34765	1.37601e-05	0.000309178		Cdyl2__chr8	-3.40948	0.0104582
ENSG00000136271	DDX56	537.093	3.02879	0.743766	4.07224	4.6563e-05	0.000870208		ENSG00000106258	CYP3A5	1642.3	-2.88034	0.685531	-4.20161	2.65023e-05	0.000535333		Ipo13__chr4	-3.41041	0.00315861
ENSG00000158604	TMED4	476.728	2.17991	0.667353	3.2665	0.00108887	0.010725		ENSG00000282301	CYP3A7-CYP3A51P	515.979	-5.23396	0.702812	-7.44717	9.53655e-14	2.09638e-11		Gm10069__chr6	-3.41284	0.032417
ENSG00000196262	PPIA	17877.9	3.2282	0.730746	4.41768	9.97675e-06	0.000250963		ENSG00000160870	CYP3A7	936.56	-5.50448	0.644509	-8.54058	1.33551e-17	5.34136e-15		BC068281__chr12	-3.4167	0.0269534
ENSG00000122679	RAMP3	136.471	-10.5558	1.61363	-6.54165	6.08444e-11	9.98632e-09		ENSG00000160868	CYP3A4	3287.74	-3.94551	0.981988	-4.01788	5.87236e-05	0.00104087		Mboat2__chr12	-3.41909	0.0266012
ENSG00000136205	TNS3	308.174	-2.27325	0.687584	-3.30615	0.000945884	0.00961958		ENSG00000021461	CYP3A43	126.332	-3.73485	0.960634	-3.88791	0.000101112	0.00162705		Cyp4a12b__chr4	-3.4219	0.0269615
ENSG00000185811	IKZF1	16.4485	-7.50072	2.69058	-2.78777	0.00530717	0.0354746		ENSG00000166508	MCM7	783.863	2.82877	0.771813	3.6651	0.000247246	0.00333792		Txlng__chrX	-3.4263	1.11e-09
ENSG00000106070	GRB10	91.8917	-1.75144	0.728894	-2.40287	0.016267	0.0803272		ENSG00000106290	TAF6	117.253	2.52227	0.838385	3.00848	0.00262554	0.0212246		Ifnar1__chr16	-3.42807	7.42e-11
ENSG00000146648	EGFR	264.954	-2.86001	0.912298	-3.13495	0.00171886	0.0151762		ENSG00000214300	SPDYE3	85.3267	-3.84658	0.955765	-4.02461	5.70701e-05	0.00101671		Marf1__chr16	-3.42853	1.48e-08
ENSG00000146733	PSPH	436.58	3.26245	0.70287	4.64162	3.45693e-06	0.000105925		ENSG00000172336	POP7	430.515	2.09078	0.657219	3.18125	0.00146641	0.0135919		Upf3b__chrX	-3.43282	2.4e-07
ENSG00000146731	CCT6A	1073.79	2.47755	0.66523	3.72436	0.000195814	0.00276491		ENSG00000087077	TRIP6	235.102	-1.80084	0.720016	-2.50111	0.0123806	0.0676452		2410002F23Rik__chr7	-3.43507	0.00230865
ENSG00000129103	SUMF2	886.395	1.57266	0.661794	2.37636	0.0174844	0.0851964		ENSG00000106366	SERPINE1	321.313	-3.83137	0.775802	-4.93859	7.86885e-07	2.91403e-05		4930470H14Rik__chr17	-3.44435	0.0343982
ENSG00000106153	CHCHD2	5187.55	2.96781	0.745583	3.98052	6.87643e-05	0.00118041		ENSG00000106367	AP1S1	418.857	2.76628	0.818161	3.3811	0.000721962	0.00771539		Cops7b__chr1	-3.45032	0.000153643
ENSG00000169919	GUSB	739.798	1.74949	0.690903	2.53218	0.0113356	0.0616299		ENSG00000257923	CUX1	413.73	-1.90984	0.702898	-2.7171	0.00658571	0.0421939		Diap1__chr18	-3.45538	0.00751358
ENSG00000158321	AUTS2	108.284	-4.23258	1.18654	-3.56716	0.000360866	0.00456996		ENSG00000260097	SPDYE6	20.1007	-4.69851	1.69058	-2.77923	0.00544876	0.0364517		Pak3__chrX	-3.45984	0.0240113
ENSG00000130305	NSUN5	239.777	3.119	0.810295	3.84922	0.000118495	0.00182724		ENSG00000160993	ALKBH4	86.2741	3.26822	0.999215	3.27079	0.00107248	0.0106362		Cdk12__chr11	-3.46508	4.75e-09
ENSG00000009954	BAZ1B	263.605	-1.71661	0.614607	-2.79302	0.00522192	0.0351457		ENSG00000161036	LRWD1	165.055	1.88555	0.75984	2.48151	0.0130827	0.0703517		Zfp282__chr6	-3.46584	0.00121039
ENSG00000071462	BUD23	811.162	2.40261	0.654194	3.67263	0.00024007	0.00324604		ENSG00000205238	SPDYE2	34.0769	-5.18639	1.43557	-3.61276	0.000302949	0.00393073		Gjc3__chr5	-3.47087	0.0492907
ENSG00000106077	ABHD11	94.3649	2.52011	0.929504	2.71124	0.00670316	0.0421222		ENSG00000173678	SPDYE2B	27.9186	-3.97634	1.40145	-2.83731	0.00454959	0.0320072		mt-Rnr1__chrM	-3.47708	1.03e-07
ENSG00000165215	CLDN3	547.294	3.03455	1.04711	2.89803	0.00375517	0.0272665		ENSG00000161057	PSMC2	781.937	1.70955	0.731513	2.337	0.0194391	0.0936988		Isg15__chr4	-3.48707	0.0107426
ENSG00000189143	CLDN4	985.943	9.05743	1.18762	7.62656	2.41094e-14	9.08322e-12		ENSG00000005483	KMT2E	309.576	-2.48058	0.797083	-3.11208	0.00185775	0.0162672		Satb1__chr17	-3.49217	0.0479224
ENSG00000049540	ELN	21.5455	-2.87261	1.05959	-2.71105	0.00670701	0.0421237		ENSG00000146776	ATXN7L1	34.5478	-3.51156	1.28907	-2.7241	0.00644766	0.0414755		Rprd1a__chr18	-3.49331	0.000795699
ENSG00000170092	SPDYE5	29.6775	-4.42375	1.18344	-3.73806	0.000185449	0.00263652		ENSG00000008282	SYPL1	870.95	2.22478	0.657007	3.38624	0.000708585	0.00761312		Sort1__chr3	-3.49412	0.00670306
ENSG00000005486	RHBDD2	643.727	1.87508	0.77247	2.42738	0.0152083	0.076675		ENSG00000253276	CCDC71L	49.3674	-3.70001	1.27939	-2.892	0.00382794	0.0281044		B930025P03Rik__chr8	-3.49891	0.0453803
ENSG00000127948	POR	6991.52	2.83518	0.823298	3.44368	0.000573844	0.00653339		ENSG00000091138	SLC26A3	15.527	7.2248	2.39264	3.01959	0.00253116	0.0206917		Nlrp10__chr7	-3.50269	0.0265876
ENSG00000146701	MDH2	3316.12	2.77864	0.712124	3.90191	9.54371e-05	0.001533		ENSG00000091140	DLD	521.059	1.78646	0.642689	2.77966	0.00544154	0.0364394		Eps8l1__chr7	-3.50667	0.00901467
ENSG00000106211	HSPB1	1651.89	1.5496	0.580574	2.66908	0.00760593	0.0462522		ENSG00000091136	LAMB1	115.523	3.21008	0.982122	3.26852	0.00108113	0.0106902		Itsn2__chr12	-3.5106	0.000288986
ENSG00000185040	SPDYE16	42.1908	-3.26061	0.994573	-3.2784	0.00104398	0.0103505		ENSG00000091129	NRCAM	148.987	3.60382	1.14707	3.14175	0.00167939	0.0151363		Sytl2__chr7	-3.51586	0.0163056
ENSG00000135205	CCDC146	20.6237	-3.58697	1.40077	-2.56071	0.0104459	0.0580883		ENSG00000135269	TES	176.957	2.59419	0.783427	3.31134	0.000928497	0.00944917		Cacnb4__chr2	-3.51701	0.0355623
ENSG00000127951	FGL2	41.0612	-4.49427	1.31851	-3.40861	0.000652942	0.0071776		ENSG00000198898	CAPZA2	693.874	2.23116	0.632251	3.52891	0.000417279	0.00505347		Hmga2__chr10	-3.51891	0.00586157
ENSG00000075223	SEMA3C	28.101	4.72698	1.30778	3.61451	0.000300913	0.00390927		ENSG00000128609	NDUFA5	533.739	1.88889	0.642375	2.94048	0.00327699	0.0250592		Fam133b__chr5	-3.51978	8.64e-13
ENSG00000170381	SEMA3E	46.9796	2.45589	1.06007	2.31671	0.0205194	0.0952847		ENSG00000106299	WASL	471.193	-1.75843	0.735149	-2.39193	0.0167598	0.0840251		Galnt3__chr2	-3.52694	0.0232625
ENSG00000075213	SEMA3A	6.52214	5.49391	2.19627	2.50147	0.012368	0.0656295		ENSG00000048405	ZNF800	82.0969	-2.30054	0.906694	-2.53728	0.0111718	0.0624483		Asap3__chr4	-3.5284	0.00202361
ENSG00000164659	KIAA1324L	7.45219	6.61258	2.25569	2.93152	0.0033731	0.0251421		ENSG00000004059	ARF5	893.381	1.57222	0.634919	2.47626	0.0132768	0.0711086		Slc8a1__chr17	-3.52962	0.0209283
ENSG00000127954	STEAP4	134.461	-2.28991	0.806137	-2.8406	0.00450291	0.0313633		ENSG00000128594	LRRC4	29.963	-8.32718	2.04884	-4.06433	4.81697e-05	0.000882662		Cmah__chr13	-3.53526	1.89e-07
ENSG00000058091	CDK14	75.9064	-3.06211	0.807503	-3.79207	0.000149397	0.00219943		ENSG00000106348	IMPDH1	175.755	4.57527	0.872158	5.24592	1.55503e-07	7.44831e-06		Alkbh8__chr9	-3.53841	0.0168106
ENSG00000127914	AKAP9	658.325	-3.45882	0.665869	-5.19445	2.05325e-07	1.0715e-05		ENSG00000135245	HILPDA	106.07	3.5332	0.950687	3.71647	0.000202026	0.0028424		Rab27b__chr18	-3.54536	0.0200404
ENSG00000001630	CYP51A1	1807.14	2.12635	0.84509	2.51612	0.0118653	0.0636955		ENSG00000128595	CALU	1200.69	1.72697	0.67507	2.55821	0.0105213	0.0598753		Tmem136__chr9	-3.5481	0.0188734
ENSG00000240720	LRRD1	1771.72	2.09133	0.848793	2.46388	0.0137441	0.0710211		ENSG00000135253	KCP	238.481	2.50763	0.752991	3.33022	0.000867759	0.00900286		Mau2__chr8	-3.54851	3.92e-06
ENSG00000001629	ANKIB1	89.3583	-1.87911	0.797987	-2.35481	0.0185323	0.0886608		ENSG00000128524	ATP6V1F	1442.76	2.34797	0.67258	3.49099	0.000481227	0.00563592		Bik__chr15	-3.56009	0.00507153
ENSG00000177409	SAMD9L	16.6026	-4.269	1.5647	-2.72832	0.00636583	0.0405303		ENSG00000158457	TSPAN33	109.766	-2.96128	0.866481	-3.41759	0.000631774	0.00696083		Chd7__chr4	-3.56025	5.5e-09
ENSG00000127920	GNG11	216.538	-4.95099	0.886114	-5.58731	2.30614e-08	1.68409e-06		ENSG00000128602	SMO	122.543	-3.19902	0.86976	-3.67805	0.000235023	0.00321359		mtNd4l__chrM	-3.56808	1.12e-14
ENSG00000127990	SGCE	121.85	3.18545	0.961897	3.31163	0.000927546	0.00945887		ENSG00000186591	UBE2H	207.397	-1.98059	0.730198	-2.7124	0.00667971	0.0426722		Nkapl__chr13	-3.57192	0.00140996
ENSG00000105852	PON3	2019.65	1.51405	0.548365	2.76102	0.00576216	0.0376225		ENSG00000128607	KLHDC10	114.166	-2.51351	0.883407	-2.84524	0.00443781	0.0314281		Ebf2__chr14	-3.57437	0.0335105
ENSG00000105854	PON2	4795.24	3.71374	0.970316	3.82735	0.000129529	0.00195913		ENSG00000106484	MEST	314.502	1.73723	0.680674	2.55222	0.010704	0.0606382		5930430L01Rik__chr5	-3.57761	0.00176986
ENSG00000005981	ASB4	69.9417	5.15615	1.15325	4.47098	7.78614e-06	0.000204874		ENSG00000128585	MKLN1	264.71	-1.99226	0.705307	-2.82467	0.00473289	0.0328632		Peg3__chr7	-3.58297	0.00309071
ENSG00000004799	PDK4	131.958	-2.47515	0.962003	-2.57291	0.0100847	0.0566692		ENSG00000106554	CHCHD3	235.177	2.16534	0.771362	2.80716	0.00499797	0.0341991		Scara3__chr14	-3.58714	0.0278225
ENSG00000158560	DYNC1I1	26.975	2.7752	1.1015	2.51948	0.0117529	0.0632149		ENSG00000198074	AKR1B10	4910.95	5.85222	0.819886	7.13784	9.48093e-13	1.70422e-10		Lmbrd2__chr15	-3.58957	3.19e-05
ENSG00000196636	SDHAF3	272.882	3.75961	0.891449	4.21742	2.47116e-05	0.000527212		ENSG00000227471	AKR1B15	494.274	3.33027	0.99649	3.342	0.000831781	0.00868172		Gm8221__chr15	-3.59043	0.037685
ENSG00000070669	ASNS	273.045	4.36163	1.3857	3.14761	0.00164611	0.0146707		ENSG00000122786	CALD1	973.269	-2.04535	0.620083	-3.29851	0.000971992	0.00981525		Rpph1__chr14	-3.60045	0.0272677
ENSG00000164713	BRI3	259.09	-2.27431	0.708879	-3.20832	0.00133511	0.0124825		ENSG00000122783	C7orf49	415.14	2.76102	0.714737	3.86299	0.000112009	0.00176023		Zfp462__chr4	-3.6199	0.0143237
ENSG00000006453	BAIAP2L1	198.234	-1.99173	0.763144	-2.6099	0.00905675	0.0523697		ENSG00000243317	C7orf73	1131.03	2.62224	0.717625	3.65406	0.000258123	0.00345851		Pcdh7__chr5	-3.62403	0.0363642
ENSG00000241685	ARPC1A	1277.4	2.7358	0.690697	3.96093	7.46582e-05	0.00125646		ENSG00000122787	AKR1D1	345.302	-2.92593	0.6989	-4.18648	2.83313e-05	0.000566555		Pdcd4__chr19	-3.63186	0.000363857
ENSG00000130429	ARPC1B	780.221	1.98459	0.713038	2.78328	0.00538118	0.0358569		ENSG00000236279	CLEC2L	180.383	9.4788	1.51508	6.25631	3.94202e-10	4.04259e-08		Tgfb2__chr1	-3.63233	0.00987553
ENSG00000106245	BUD31	510.486	1.91881	0.684569	2.80295	0.00506377	0.0342901		ENSG00000064393	HIPK2	220.69	-3.27152	0.800699	-4.08582	4.39206e-05	0.000817976		Lrrd1__chr5	-3.64368	0.0252156
ENSG00000106246	PTCD1	587.574	2.48295	0.589419	4.21254	2.52511e-05	0.000535964		ENSG00000257093	KIAA1147	90.1898	-4.05924	1.05568	-3.84515	0.000120481	0.00186228		mtAtp8__chrM	-3.65313	1.71e-11
ENSG00000248919	ATP5J2-PTCD1	755.861	3.72459	0.751856	4.95386	7.27554e-07	3.07714e-05		ENSG00000106028	SSBP1	962.514	1.95991	0.618008	3.17133	0.0015174	0.0139594		Snora30__chr7	-3.65915	0.0154038
ENSG00000241468	ATP5J2	1684.27	3.32508	0.769901	4.31884	1.5685e-05	0.000363142		ENSG00000127364	TAS2R4	52.8862	3.15417	1.05865	2.97942	0.00288795	0.022731		Napb__chr2	-3.67128	0.0104215
ENSG00000106258	CYP3A5	1808.07	-3.48136	0.993281	-3.50491	0.000456767	0.00545128		ENSG00000243896	OR2A7	15.354	-7.10866	2.40007	-2.96185	0.00305793	0.023771		Kdm6b__chr11	-3.67781	0.00492843
ENSG00000282301	CYP3A7-CYP3A51P	230.111	-3.99962	1.24863	-3.2032	0.00135909	0.01265		ENSG00000155660	PDIA4	2443.81	1.49037	0.603582	2.46921	0.0135413	0.072187		Trps1__chr15	-3.67986	0.0198663
ENSG00000160870	CYP3A7	291.387	-3.83336	1.19008	-3.22109	0.00127705	0.0120831		ENSG00000171130	ATP6V0E2	1442.7	1.93411	0.639368	3.02503	0.00248604	0.0204124		Scd3__chr19	-3.68197	0.0086165
ENSG00000160868	CYP3A4	4961.25	-6.50322	2.26775	-2.86771	0.00413461	0.0293703		ENSG00000106538	RARRES2	5593.89	-1.86824	0.719786	-2.59554	0.00944413	0.055576		Cyp1b1__chr17	-3.68811	0.00801461
ENSG00000021461	CYP3A43	187.086	-4.71174	1.53068	-3.07819	0.00208261	0.0174361		ENSG00000179144	GIMAP7	31.6259	-4.54354	1.80109	-2.52266	0.011647	0.0645801		Syne1__chr10	-3.68847	8.48e-11
ENSG00000166508	MCM7	510.044	3.26081	0.757957	4.30211	1.69181e-05	0.000385476		ENSG00000106560	GIMAP2	114.623	3.02714	0.847121	3.57345	0.000352312	0.00438622		Lamp3__chr16	-3.68993	0.00747372
ENSG00000106351	AGFG2	293.012	-1.78537	0.754018	-2.36781	0.0178935	0.0865793		ENSG00000281887	GIMAP1-GIMAP5	54.3084	-9.19298	1.8514	-4.96541	6.8555e-07	2.59277e-05		Cd84__chr1	-3.69092	9.44e-05
ENSG00000106333	PCOLCE	102.173	-2.98478	0.732713	-4.0736	4.62911e-05	0.000867082		ENSG00000196329	GIMAP5	56.4662	-9.24443	1.8424	-5.01759	5.23243e-07	2.07713e-05		Secisbp2__chr13	-3.6973	0.00138325
ENSG00000172336	POP7	332.727	1.66649	0.581307	2.8668	0.0041465	0.0294249		ENSG00000164885	CDK5	146.202	1.95244	0.784308	2.48938	0.0127967	0.0692497		Usp42__chr5	-3.70032	0.0020827
ENSG00000130427	EPO	45.5178	-7.36401	1.81815	-4.05027	5.11594e-05	0.000943348		ENSG00000106615	RHEB	1591.05	3.00473	0.690298	4.3528	1.34409e-05	0.000304047		E030024N20Rik__chr19	-3.70576	0.0242794
ENSG00000106367	AP1S1	282.367	3.09504	0.832609	3.71728	0.000201376	0.00282899		ENSG00000106617	PRKAG2	147.715	-3.50594	1.09276	-3.20834	0.00133502	0.0125781		Hoxc8__chr15	-3.71021	0.0312831
ENSG00000106397	PLOD3	390.588	2.30361	0.701526	3.28372	0.00102448	0.0101998		ENSG00000055609	KMT2C	280.095	-4.50272	0.728395	-6.18169	6.34181e-10	6.26273e-08		Ryr2__chr13	-3.71527	0.0218354
ENSG00000260097	SPDYE6	12.04	-4.08339	1.76418	-2.31462	0.0206338	0.0957039		ENSG00000186480	INSIG1	4669.63	-1.51385	0.592186	-2.55637	0.0105769	0.0601012		Arid3a__chr10	-3.74143	0.0205429
ENSG00000160993	ALKBH4	65.0368	2.36224	0.885885	2.66653	0.00766382	0.0464169		ENSG00000184863	RBM33	145.667	-2.45927	0.819249	-3.00186	0.00268332	0.0214854		March7__chr2	-3.74333	0.0065196
ENSG00000161036	LRWD1	113.14	2.12993	0.788001	2.70296	0.00687257	0.0428618		ENSG00000105993	DNAJB6	493.927	2.0333	0.650716	3.12472	0.00177975	0.0157917		Tyw3__chr3	-3.75637	0.00510869
ENSG00000005075	POLR2J	407.117	1.88426	0.699497	2.69374	0.0070655	0.0437686		ENSG00000182378	PLCXD1	411.144	1.6278	0.676095	2.40765	0.0160557	0.0814391		H2-Q4__chr17	-3.75964	0.0110024
ENSG00000205238	SPDYE2	14.2073	-4.01389	1.52526	-2.63162	0.00849795	0.0499364		ENSG00000169100	SLC25A6	2918.28	1.969	0.62056	3.17295	0.00150899	0.013898		Dusp18__chr11	-3.77606	0.00457254
ENSG00000173678	SPDYE2B	16.7503	-3.29128	1.38138	-2.3826	0.017191	0.0840757		ENSG00000002586	CD99	2579.62	1.66269	0.609376	2.72851	0.00636204	0.0410569		Nat10__chr2	-3.77676	1.38e-06
ENSG00000161048	NAPEPLD	100.886	-2.09393	0.786836	-2.66121	0.00778611	0.0469006		ENSG00000006756	ARSD	304.714	-2.2554	0.689333	-3.27186	0.00106844	0.0106167		Rep15__chr6	-3.78884	0.0164331
ENSG00000005483	KMT2E	317.134	-2.54499	0.703777	-3.61619	0.000298974	0.00390243		ENSG00000101849	TBL1X	118.553	-2.22029	0.824027	-2.69444	0.00705061	0.0444428		Zbed6__chr1	-3.78952	5.37e-05
ENSG00000185055	EFCAB10	35.1353	-2.62623	1.11345	-2.35864	0.0183422	0.0880756		ENSG00000101911	PRPS2	170.676	1.95082	0.808899	2.41169	0.0158787	0.0807692		mt-Tr__chrM	-3.79028	0.0274338
ENSG00000146776	ATXN7L1	36.3648	-3.65614	1.30119	-2.80984	0.00495667	0.0337163		ENSG00000044446	PHKA2	342.564	-2.53275	0.705321	-3.59092	0.000329516	0.00419713		mt-Tl1__chrM	-3.79154	0.0111964
ENSG00000105835	NAMPT	563.798	-1.92764	0.713677	-2.70099	0.00691326	0.0430023		ENSG00000177189	RPS6KA3	269.643	-1.71201	0.700955	-2.4424	0.01459	0.0760296		Grk4__chr5	-3.7933	0.00506718
ENSG00000253276	CCDC71L	43.6684	-3.67263	1.0335	-3.55357	0.000380034	0.00476898		ENSG00000174010	KLHL15	16.1542	-4.64066	1.96355	-2.36339	0.0181084	0.0890281		Ccdc171__chr4	-3.7966	0.0135224
ENSG00000005249	PRKAR2B	18.09	-4.63111	1.72084	-2.69119	0.00711981	0.0440392		ENSG00000099399	MAGEB2	12.5013	6.44755	2.56222	2.51639	0.0118564	0.0654744		8430431K14Rik__chr19	-3.79875	0.0270796
ENSG00000091138	SLC26A3	10.164	7.05543	2.11433	3.33696	0.000846991	0.00878634		ENSG00000157625	TAB3	162.881	-2.44874	0.76882	-3.18506	0.00144722	0.0134452		Simc1__chr13	-3.79924	0.00539777
ENSG00000091129	NRCAM	90.3664	10.2193	1.68927	6.04955	1.45248e-09	1.61596e-07		ENSG00000198947	DMD	207.538	-2.61339	0.759082	-3.44284	0.00057565	0.00645358		Gm9159__chrX	-3.79927	0.0242289
ENSG00000173114	LRRN3	16.5157	-5.68868	2.35358	-2.41703	0.0156476	0.078094		ENSG00000165168	CYBB	63.2163	-9.39378	1.81636	-5.17178	2.31879e-07	1.05687e-05		Gpc6__chr14	-3.81471	0.00433404
ENSG00000128512	DOCK4	76.1449	-4.00492	0.881933	-4.54107	5.59683e-06	0.00015593		ENSG00000165169	DYNLT3	305.938	1.70642	0.695696	2.45282	0.0141741	0.0743468		Rasef__chr4	-3.81754	0.0146863
ENSG00000135272	MDFIC	74.869	-3.59726	0.985583	-3.64988	0.000262358	0.00349046		ENSG00000182220	ATP6AP2	1053.96	2.49067	0.646827	3.85059	0.000117831	0.00183016		Rnf125__chr18	-3.81804	5.18e-08
ENSG00000105967	TFEC	7.55205	-6.37309	2.48128	-2.56847	0.0102148	0.0572257		ENSG00000130988	RGN	608.706	-2.75233	0.746185	-3.68853	0.000225553	0.00311875		Sema5a__chr15	-3.83336	0.00403165
ENSG00000071243	ING3	53.3081	-1.91204	0.782789	-2.4426	0.0145817	0.0741895		ENSG00000102265	TIMP1	7848.15	1.83311	0.77866	2.35418	0.0185636	0.0906811		Snora81__chr16	-3.83447	0.0249025
ENSG00000106034	CPED1	107.595	-3.30503	0.800257	-4.12996	3.62829e-05	0.000716909		ENSG00000165583	SSX5	11.5994	5.70131	2.35204	2.42399	0.0153511	0.0789159		Tmem26__chr10	-3.84707	0.0165474
ENSG00000235631	RNF148	20.4279	-6.53919	2.32422	-2.8135	0.00490053	0.0333893		ENSG00000126752	SSX1	490.938	8.60065	1.17613	7.31269	2.6185e-13	5.04707e-11		Ces2a__chr8	-3.86074	1.22e-10
ENSG00000048405	ZNF800	87.3888	-2.55525	0.759828	-3.36293	0.000771199	0.00817925		ENSG00000165584	SSX3	18.5337	7.63917	2.28014	3.3503	0.000807234	0.00845719		Slc5a12__chr2	-3.86592	0.0175495
ENSG00000004059	ARF5	585.454	2.1244	0.723659	2.93563	0.00332868	0.0249343		ENSG00000268009	SSX4	49.0818	7.58043	1.63278	4.64264	3.43979e-06	9.77439e-05		Slco5a1__chr1	-3.87375	0.0257244
ENSG00000128594	LRRC4	30.3505	-8.38254	1.81562	-4.61689	3.89536e-06	0.000116558		ENSG00000269791	SSX4B	53.9079	8.83167	1.88483	4.68565	2.79075e-06	8.23735e-05		A830082N09Rik__chr10	-3.87595	0.00456569
ENSG00000106348	IMPDH1	132.904	2.93343	0.839726	3.49332	0.000477054	0.00564463		ENSG00000102109	PCSK1N	259.439	2.26029	0.898344	2.51607	0.0118673	0.0655115		Gm8234__chr3	-3.87629	0.00265628
ENSG00000135245	HILPDA	78.4131	2.61807	1.08367	2.41593	0.0156951	0.0782256		ENSG00000243279	PRAF2	221.665	3.14443	0.734767	4.27949	1.87321e-05	0.000398505		Serpina12__chr12	-3.89047	0.0134234
ENSG00000128595	CALU	763.806	2.34086	0.93334	2.50805	0.01214	0.0648456		ENSG00000049768	FOXP3	27.1805	-4.84386	1.66475	-2.90967	0.00361814	0.0269543		Slfn10-ps__chr11	-3.89619	0.0101421
ENSG00000135253	KCP	164.918	2.50077	0.673781	3.71156	0.000205989	0.00287431		ENSG00000049769	PPP1R3F	214.296	5.24031	0.909668	5.76068	8.37743e-09	6.09191e-07		Ccnjl__chr11	-3.91434	0.0259277
ENSG00000128524	ATP6V1F	968.199	2.54361	0.761063	3.34219	0.000831213	0.00869338		ENSG00000215274	GAGE10	3727.63	11.9329	1.07989	11.0502	2.18778e-28	2.33334e-25		Gm20752__chr3	-3.92405	0.0240755
ENSG00000158457	TSPAN33	71.3342	-2.4881	0.808843	-3.07612	0.00209716	0.0175225		ENSG00000224659	GAGE12J	6683.26	11.4784	0.892111	12.8665	6.94393e-38	2.22178e-34		BC005561__chr5	-3.94899	3.7e-12
ENSG00000186591	UBE2H	199.421	-2.05831	0.742277	-2.77297	0.00555469	0.0365774		ENSG00000274274	GAGE13	7386.1	10.6709	0.922331	11.5694	5.88698e-31	6.72713e-28		Gad2__chr2	-3.95165	0.0116244
ENSG00000128607	KLHDC10	96.706	-2.5036	0.800962	-3.12574	0.00177359	0.0154922		ENSG00000275113	GAGE2E	4458.72	13.3156	1.14757	11.6033	3.96512e-31	4.87954e-28		Bin3__chr14	-3.95208	1.37e-06
ENSG00000106484	MEST	216.153	1.96111	0.774028	2.53364	0.0112883	0.061468		ENSG00000236737	GAGE12B	578.41	12.2724	4.29012	2.86061	0.00422827	0.0303199		Fam228b__chr12	-3.95334	0.00736044
ENSG00000128585	MKLN1	281.956	-2.22484	0.665505	-3.34308	0.000828532	0.0086763		ENSG00000237671	GAGE12C	5772.96	11.9748	0.954526	12.5453	4.2164e-36	9.63629e-33		D430020J02Rik__chr12	-3.97356	0.00818075
ENSG00000198074	AKR1B10	3139.16	7.04569	1.55358	4.53513	5.75682e-06	0.000158787		ENSG00000227488	GAGE12D	5815.57	11.6043	1.08348	10.7102	9.11451e-27	8.57729e-24		Gm19757__chr6	-3.98039	0.00941165
ENSG00000227471	AKR1B15	312.886	5.66956	1.38885	4.0822	4.46106e-05	0.000839399		ENSG00000216649	GAGE12E	5763.74	12.2908	1.04261	11.7885	4.47323e-32	5.96357e-29		Luc7l3__chr11	-3.98827	1.79e-26
ENSG00000122786	CALD1	1103.96	-2.44498	0.577547	-4.23339	2.30191e-05	0.000496212		ENSG00000236362	GAGE12F	5829.89	12.016	0.963557	12.4705	1.08127e-35	2.16228e-32		Zfp300__chrX	-3.98884	0.0217782
ENSG00000122783	C7orf49	297.021	2.53035	0.784672	3.22473	0.00126092	0.0119579		ENSG00000215269	GAGE12G	5859.79	13.3075	1.07715	12.3544	4.61465e-35	8.2028e-32		A630001G21Rik__chr1	-4.00433	0.020418
ENSG00000243317	C7orf73	784.645	2.67582	0.735078	3.64018	0.000272445	0.00361306		ENSG00000224902	GAGE12H	6191.92	10.803	1.00643	10.7339	7.05242e-27	7.05154e-24		Ptchd4__chr17	-4.01096	0.0211102
ENSG00000189320	FAM180A	14.9849	-6.06032	1.78805	-3.38935	0.000700581	0.00755711		ENSG00000205777	GAGE1	7622.63	11.6632	0.964034	12.0983	1.07793e-33	1.5677e-30		Gm1966__chr7	-4.02862	0.0214489
ENSG00000236279	CLEC2L	116.026	10.5786	1.48145	7.1407	9.28538e-13	2.45098e-10		ENSG00000189064	GAGE2A	9678.54	12.3109	0.958104	12.8493	8.68108e-38	2.31466e-34		Cep85l__chr10	-4.05682	0.00649721
ENSG00000064393	HIPK2	367.824	-4.20252	0.662492	-6.3435	2.24602e-10	3.05182e-08		ENSG00000068985	PAGE1	355.483	6.27431	1.22377	5.12703	2.94344e-07	1.26993e-05		Itga4__chr2	-4.05817	0.00301466
ENSG00000006459	KDM7A	69.4626	-4.40983	1.02898	-4.28564	1.8221e-05	0.000411902		ENSG00000171365	CLCN5	144.411	-2.24773	0.792763	-2.83531	0.00457808	0.032137		Nbea__chr3	-4.05916	0.000548034
ENSG00000133597	ADCK2	65.619	3.15316	1.16009	2.71803	0.00656727	0.0414568		ENSG00000187690	CXorf67	90.8856	7.11158	1.71484	4.14709	3.36723e-05	0.000653749		mt-Th__chrM	-4.08356	5.81e-10
ENSG00000090266	NDUFB2	1120.63	1.67777	0.719479	2.33192	0.0197048	0.0927711		ENSG00000179222	MAGED1	1531.62	2.09649	0.602182	3.4815	0.000498614	0.00576777		Ces1e__chr8	-4.08591	2.24e-05
ENSG00000257093	KIAA1147	36.6644	-2.40748	1.0339	-2.32853	0.0198839	0.0933755		ENSG00000187243	MAGED4B	77.4781	4.50076	1.00508	4.47801	7.53416e-06	0.000188037		Gm9926__chr18	-4.09708	0.00430846
ENSG00000127364	TAS2R4	37.588	2.73954	0.959571	2.85497	0.00430413	0.0302643		ENSG00000154545	MAGED4	84.4809	3.61049	0.964378	3.74385	0.000181223	0.00258588		Phf11d__chr14	-4.09863	0.00221539
ENSG00000197448	GSTK1	1819.67	2.32135	0.758719	3.05956	0.00221659	0.0182899		ENSG00000204379	XAGE1A	2156.24	6.37834	1.17846	5.41242	6.21792e-08	3.43015e-06		Ugt2b38__chr5	-4.09879	0.0187567
ENSG00000159840	ZYX	562.862	1.81289	0.753386	2.40632	0.0161142	0.0797387		ENSG00000204382	XAGE1B	2182.9	6.68468	1.24457	5.37108	7.82686e-08	4.18777e-06		Plekha5__chr6	-4.11119	4e-05
ENSG00000174469	CNTNAP2	108.355	2.45737	0.759748	3.23445	0.00121877	0.0116919		ENSG00000187754	SSX7	17.154	6.26314	2.11728	2.9581	0.00309541	0.0239692		Fut9__chr4	-4.12291	0.0120337
ENSG00000171130	ATP6V0E2	894.264	3.13375	1.10581	2.83389	0.00459851	0.031802		ENSG00000241476	SSX2	54.3438	6.45732	1.53375	4.21014	2.55211e-05	0.000521438		Kcnq1ot1__chr7	-4.13063	1.04e-06
ENSG00000106526	ACTR3C	104.318	-1.82878	0.670475	-2.72759	0.00637983	0.0405982		ENSG00000268447	SSX2B	48.8213	6.12864	1.37939	4.44301	8.87073e-06	0.000214371		Ppp4r1l-ps__chr2	-4.13802	0.00387109
ENSG00000171115	GIMAP8	107.658	-7.53285	1.32631	-5.67954	1.35059e-08	1.05607e-06		ENSG00000086758	HUWE1	570.661	-2.62159	0.638437	-4.10626	4.02117e-05	0.000762212		4833422C13Rik__chr13	-4.15405	0.00388151
ENSG00000179144	GIMAP7	65.5564	-3.91458	1.36051	-2.87728	0.00401113	0.0286482		ENSG00000184083	FAM120C	58.2337	-3.01697	1.07141	-2.81588	0.0048644	0.0335001		Zfp560__chr9	-4.1744	2.16e-05
ENSG00000133574	GIMAP4	94.6765	-3.53212	1.40927	-2.50634	0.0121987	0.0650353		ENSG00000196632	WNK3	92.5083	-4.11002	0.926517	-4.43599	9.16507e-06	0.000220154		Bmp8a__chr4	-4.19081	0.00217803
ENSG00000133561	GIMAP6	32.756	-8.49495	2.23566	-3.79975	0.000144841	0.00214569		ENSG00000102302	FGD1	54.6741	-2.4798	1.06236	-2.33423	0.0195839	0.0941803		mt-Tq__chrM	-4.20054	0.00336617
ENSG00000281887	GIMAP1-GIMAP5	81.5805	-9.81114	1.78488	-5.49681	3.86724e-08	2.61662e-06		ENSG00000158571	PFKFB1	110.452	-4.69103	0.973368	-4.81938	1.44008e-06	4.80968e-05		Ppargc1b__chr18	-4.20187	0.000506849
ENSG00000213203	GIMAP1	35.1406	-2.67701	1.09706	-2.44016	0.0146809	0.074571		ENSG00000238269	PAGE2B	887.119	5.39133	0.986631	5.46439	4.64504e-08	2.65398e-06		Zfp867__chr11	-4.20308	0.000135013
ENSG00000196329	GIMAP5	78.6906	-9.75921	1.74851	-5.58145	2.38518e-08	1.73168e-06		ENSG00000234068	PAGE2	943.29	4.58357	0.828554	5.53201	3.16576e-08	1.88977e-06		Cbl__chr9	-4.20982	0.0020727
ENSG00000133612	AGAP3	114.097	-1.66268	0.672356	-2.47292	0.0134013	0.0697372		ENSG00000158639	PAGE5	996.85	4.70888	0.858499	5.48501	4.13443e-08	2.41396e-06		mt-Tp__chrM	-4.23325	0.0171913
ENSG00000106615	RHEB	1162.41	2.53453	0.735829	3.44445	0.000572213	0.00651929		ENSG00000165591	FAAH2	66.0074	-3.02367	1.23877	-2.44086	0.0146524	0.0762802		2900005J15Rik__chr5	-4.26458	0.00291536
ENSG00000106617	PRKAG2	123.074	-4.31151	1.10369	-3.90647	9.36556e-05	0.00151153		ENSG00000169083	AR	362.552	-6.05215	0.863523	-7.00867	2.40587e-12	4.00928e-10		Dynlt1a__chr17	-4.26551	0.00137988
ENSG00000055609	KMT2C	257.269	-4.41157	0.815052	-5.41262	6.21098e-08	3.85616e-06		ENSG00000079482	OPHN1	344.222	-3.72171	0.747855	-4.97652	6.47388e-07	2.4733e-05		Tex13__chrX	-4.2797	0.0151838
ENSG00000184863	RBM33	167.484	-2.75235	0.784187	-3.50981	0.000448419	0.00538655		ENSG00000120509	PDZD11	260.566	1.96796	0.718812	2.7378	0.00618522	0.0402077		Gm4956__chr1	-4.28084	0.0158077
ENSG00000182378	PLCXD1	228.024	3.21978	0.941283	3.42063	0.000624767	0.00698012		ENSG00000169562	GJB1	1151.55	-2.14588	0.623565	-3.44131	0.000578903	0.00648096		E030030I06Rik__chr10	-4.28724	0.00171571
ENSG00000169100	SLC25A6	1903.81	2.82719	0.951279	2.97199	0.00295876	0.0227282		ENSG00000198034	RPS4X	8087.43	1.75558	0.667475	2.63018	0.00853406	0.0516173		Csad__chr15	-4.29488	1.18e-07
ENSG00000169084	DHRSX	401.714	2.22598	0.781944	2.84672	0.00441718	0.0308763		ENSG00000147100	SLC16A2	214.65	-3.67134	1.05294	-3.48676	0.000488918	0.00570096		Vmn1r65__chr7	-4.30617	0.000463397
ENSG00000002586	CD99	1628.03	2.61391	0.841644	3.10572	0.00189816	0.0162951		ENSG00000085224	ATRX	321.503	-2.34316	0.720978	-3.24997	0.00115417	0.0112795		Pclo__chr5	-4.31152	0.00208941
ENSG00000006756	ARSD	209.415	-1.77457	0.649648	-2.73158	0.00630309	0.040249		ENSG00000226784	PGAM4	256.272	3.97029	0.805499	4.92898	8.2658e-07	3.026e-05		Nek1__chr8	-4.31586	0.000956381
ENSG00000101825	MXRA5	11.3058	-6.95093	2.37093	-2.93174	0.00337073	0.0251356		ENSG00000102144	PGK1	5790.95	3.37507	0.592908	5.6924	1.25268e-08	8.67547e-07		A630089N07Rik__chr16	-4.34413	5.77e-05
ENSG00000130021	PUDP	205.795	2.16346	0.922052	2.34635	0.0189581	0.0902916		ENSG00000173198	CYSLTR1	176.675	-2.76207	0.838219	-3.29517	0.000983622	0.00991555		Metap1d__chr2	-4.35235	0.0019949
ENSG00000101849	TBL1X	89.0908	-1.89121	0.801966	-2.35822	0.0183629	0.0881111		ENSG00000078596	ITM2A	20.5713	-4.28573	1.6834	-2.54588	0.0109002	0.0614019		Ctnnd2__chr15	-4.36645	0.0134056
ENSG00000165195	PIGA	35.9913	-2.40591	1.03499	-2.32457	0.0200951	0.0938619		ENSG00000147180	ZNF711	11.1661	6.92917	2.63963	2.62505	0.00866362	0.0522233		Akap8l__chr17	-4.37707	6.34e-09
ENSG00000147003	TMEM27	41.2248	-4.42092	1.20691	-3.66301	0.000249273	0.00334673		ENSG00000179083	FAM133A	24.6157	7.64311	2.17192	3.51906	0.000433079	0.00518982		Slfn9__chr11	-4.39328	0.00534428
ENSG00000182798	MAGEB17	9.20768	6.92959	2.83149	2.44733	0.0143918	0.0734747		ENSG00000147202	DIAPH2	91.2477	-4.01136	0.948874	-4.22749	2.36312e-05	0.000485927		Phlpp2__chr8	-4.39569	0.000107502
ENSG00000044446	PHKA2	275.32	-2.10689	0.902959	-2.33332	0.0196315	0.0925728		ENSG00000204086	RPA4	9.2679	-6.56342	2.80423	-2.34055	0.0192556	0.0930066		Ehf__chr2	-4.40627	0.000351127
ENSG00000177189	RPS6KA3	251.399	-1.72607	0.69446	-2.48548	0.0129376	0.0678478		ENSG00000010671	BTK	16.1903	-6.01183	2.08744	-2.88	0.00397672	0.0288786		Ppp1r9a__chr6	-4.4084	3.73e-05
ENSG00000130066	SAT1	3380.61	1.86468	0.805883	2.31383	0.0206768	0.0958501		ENSG00000241343	RPL36A	3114.02	2.81157	0.592804	4.74283	2.10749e-06	6.6109e-05		mt-Tw__chrM	-4.40857	2.74e-12
ENSG00000099399	MAGEB2	8.22673	6.74674	2.35539	2.86438	0.00417831	0.0295634		ENSG00000257529	RPL36A-HNRNPH2	3044.97	2.90265	0.593168	4.89347	9.90748e-07	3.52222e-05		Gm20172__chr1	-4.4141	0.00854272
ENSG00000198814	GK	364.181	-3.14915	1.18063	-2.66734	0.00764544	0.0463734		ENSG00000196440	ARMCX4	26.1678	-3.55174	1.41528	-2.50957	0.0120878	0.0664026		Ddx55__chr5	-4.42605	2.31e-05
ENSG00000198947	DMD	236.383	-3.02348	0.659199	-4.5866	4.50522e-06	0.000131253		ENSG00000126947	ARMCX1	12.5177	5.44524	2.30233	2.3651	0.0180253	0.0887834		Runx1t1__chr4	-4.44106	0.00798969
ENSG00000147027	TMEM47	78.3615	-3.93704	0.924067	-4.26056	2.03914e-05	0.000452515		ENSG00000184905	TCEAL2	153.259	5.39655	1.28292	4.20648	2.59382e-05	0.000526426		Gm10785__chr16	-4.44187	8.46e-07
ENSG00000130962	PRRG1	38.3609	-2.49595	0.910098	-2.7425	0.00609725	0.0393132		ENSG00000184515	BEX5	82.6469	7.16276	1.39899	5.11994	3.05636e-07	1.30389e-05		Rufy3__chr5	-4.4554	9.98e-06
ENSG00000165168	CYBB	89.4463	-9.94384	1.91092	-5.2037	1.95364e-07	1.02811e-05		ENSG00000180964	TCEAL8	566.139	2.12395	0.65979	3.21914	0.00128577	0.0122512		Scaper__chr9	-4.45807	1.44e-11
ENSG00000147044	CASK	49.5579	-2.02532	0.827554	-2.44736	0.0143907	0.0734747		ENSG00000166681	BEX3	2557.6	2.06834	0.644838	3.20753	0.00133881	0.0126051		Hspa1a__chr17	-4.46179	0.000222692
ENSG00000171659	GPR34	10.066	-6.78881	2.69051	-2.52324	0.011628	0.062742		ENSG00000123562	MORF4L2	882.674	1.53191	0.616602	2.48444	0.0129756	0.0698937		Gm6225__chr18	-4.46611	0.00614948
ENSG00000189221	MAOA	397.33	-2.88903	0.617674	-4.67727	2.90724e-06	9.19719e-05		ENSG00000133138	TBC1D8B	332.757	-2.96364	0.730181	-4.05878	4.93306e-05	0.000898851		Mup21__chr4	-4.47244	1.23e-08
ENSG00000069535	MAOB	653.042	-2.02888	0.642669	-3.15695	0.00159427	0.0143085		ENSG00000165376	CLDN2	947.203	2.90414	0.629519	4.61327	3.96376e-06	0.000110091		Map3k13__chr16	-4.47511	0.000738638
ENSG00000130988	RGN	491.107	-2.64078	0.620389	-4.25665	2.0751e-05	0.000458653		ENSG00000157514	TSC22D3	303.862	-2.48666	1.01161	-2.45812	0.0139666	0.0736686		D630045M09Rik__chr13	-4.47828	0.00555324
ENSG00000102225	CDK16	262.999	2.06201	0.79635	2.58933	0.0096162	0.0548358		ENSG00000101843	PSMD10	1593.23	3.34646	0.606691	5.51592	3.46961e-08	2.04822e-06		mt-Tm__chrM	-4.48051	2.82e-10
ENSG00000126759	CFP	49.9902	-4.80078	1.10783	-4.33349	1.46767e-05	0.000344124		ENSG00000197565	COL4A6	22.2634	6.02709	2.2437	2.68623	0.0072263	0.04535		Slc7a14__chr3	-4.50573	0.000122755
ENSG00000126752	SSX1	316.84	10.2762	1.23805	8.30032	1.03831e-16	6.14719e-14		ENSG00000188153	COL4A5	22.3899	4.13352	1.57042	2.63212	0.0084855	0.0513819		Malat1__chr19	-4.5092	4.19e-09
ENSG00000165584	SSX3	12.0784	7.30823	1.9786	3.69364	0.000221063	0.00304385		ENSG00000077264	PAK3	106.2	2.605	0.977745	2.6643	0.00771495	0.0478202		Gm5577__chr6	-4.51113	0.0105091
ENSG00000268009	SSX4	31.3601	8.69551	1.73787	5.00354	5.62862e-07	2.48154e-05		ENSG00000268104	SLC6A14	69.3522	4.03877	1.26922	3.1821	0.00146211	0.0135678		Cxcl13__chr5	-4.51347	7.61e-05
ENSG00000269791	SSX4B	34.5281	8.83423	1.74004	5.07701	3.83412e-07	1.80563e-05		ENSG00000204019	CT83	150.016	9.99479	1.69758	5.88767	3.91682e-09	3.18078e-07		Ttn__chr2	-4.52922	0.00938194
ENSG00000101945	SUV39H1	34.5584	3.41803	1.469	2.32678	0.0199771	0.0935216		ENSG00000005022	SLC25A5	3743.34	2.92625	0.737629	3.9671	7.27538e-05	0.00123296		E130008D07Rik__chr17	-4.55923	0.00839087
ENSG00000102109	PCSK1N	140.654	7.98585	1.67755	4.76043	1.93185e-06	6.75618e-05		ENSG00000125354	2006-09-01	163.345	-5.44277	1.04849	-5.19105	2.09109e-07	9.71722e-06		Cxcl2__chr5	-4.56332	0.000270796
ENSG00000126768	TIMM17B	342.74	2.30883	0.764685	3.01932	0.00253343	0.0203373		ENSG00000203989	RHOXF2B	417.284	6.8971	1.09046	6.32493	2.53352e-10	2.65656e-08		Lyst__chr13	-4.57296	0.000718495
ENSG00000243279	PRAF2	151.37	3.11745	1.12177	2.77905	0.00545174	0.036114		ENSG00000131721	RHOXF2	429.337	6.27142	0.864522	7.25421	4.04018e-13	7.60409e-11		Mcmdc2__chr1	-4.57396	0.0069526
ENSG00000049769	PPP1R3F	133.67	8.30604	1.37355	6.04715	1.47431e-09	1.62931e-07		ENSG00000171155	C1GALT1C1	353.884	2.29468	0.719908	3.18746	0.00143526	0.0133419		Gm10845__chr14	-4.5779	1.41e-08
ENSG00000215274	GAGE10	2380.93	14.9357	2.91152	5.12988	2.89933e-07	1.43899e-05		ENSG00000182890	GLUD2	512.81	2.38186	0.6436	3.70085	0.000214881	0.00298999		Rsbn1__chr3	-4.62255	0.000265745
ENSG00000224659	GAGE12J	4269.01	15.7781	2.87982	5.47884	4.28118e-08	2.81623e-06		ENSG00000009694	TENM1	93.2783	-5.9128	1.2981	-4.55496	5.23948e-06	0.000137864		Supt20__chr3	-4.68523	0.00100957
ENSG00000274274	GAGE13	4719.2	13.9892	1.42116	9.84352	7.31039e-23	1.34649e-19		ENSG00000122122	SASH3	13.0366	-5.80616	2.37446	-2.44525	0.014475	0.0756274		Tigd4__chr3	-4.69633	0.0016116
ENSG00000275113	GAGE2E	2849.09	14.2097	1.54974	9.16907	4.77099e-20	4.65228e-17		ENSG00000085185	BCORL1	94.2316	-2.48182	0.87457	-2.83776	0.00454315	0.0319759		Six3__chr17	-4.7501	0.00731304
ENSG00000236737	GAGE12B	369.738	12.2489	2.79718	4.37903	1.19207e-05	0.000288902		ENSG00000147255	IGSF1	130.703	3.35497	0.826517	4.05916	4.92488e-05	0.000898383		Ppp2r2b__chr18	-4.77744	6.18e-05
ENSG00000237671	GAGE12C	3686.63	13.8196	1.45222	9.51619	1.79648e-21	2.29079e-18		ENSG00000076770	MBNL3	462.027	-3.31935	0.940866	-3.52797	0.000418759	0.00506756		Gm17644__chr1	-4.78218	0.00442905
ENSG00000227488	GAGE12D	3714.62	15.5774	2.90634	5.3598	8.33164e-08	5.0591e-06		ENSG00000165704	HPRT1	119.615	2.35559	0.907572	2.59549	0.00944562	0.055576		Zfp488__chr14	-4.79682	0.000715786
ENSG00000216649	GAGE12E	3681.31	14.5784	1.5624	9.33074	1.0513e-20	1.08921e-17		ENSG00000203950	RTL8A	590.643	2.0173	0.650795	3.09975	0.00193682	0.0168216		Gm17821__chr12	-4.8497	4.73e-07
ENSG00000236362	GAGE12F	3724.73	15.5813	2.84906	5.46894	4.52734e-08	2.93163e-06		ENSG00000169551	CT55	12.8082	7.1521	2.53436	2.82205	0.0047718	0.033033		Dppa2__chr16	-4.87939	0.00148331
ENSG00000215269	GAGE12G	3745.18	13.6548	1.42335	9.59342	8.52159e-22	1.2842e-18		ENSG00000181433	SAGE1	14.9251	6.14123	2.46718	2.48917	0.0128041	0.0692497		Kcnb2__chr1	-4.88277	0.00576303
ENSG00000224902	GAGE12H	3952.88	15.6671	2.99751	5.22669	1.7257e-07	9.23508e-06		ENSG00000129675	ARHGEF6	25.1546	-6.6741	1.86414	-3.58026	0.000343259	0.00430365		mt-Tv__chrM	-4.92569	8.15e-07
ENSG00000205777	GAGE1	4872.85	12.4351	1.10996	11.2032	3.93356e-29	1.08678e-25		ENSG00000101981	F9	468.906	-8.12415	1.08757	-7.47	8.0195e-14	1.80699e-11		Aim2__chr1	-4.92766	0.000357957
ENSG00000189064	GAGE2A	6178.63	16.3114	3.04771	5.35204	8.69686e-08	5.20462e-06		ENSG00000101974	ATP11C	212.53	-3.58462	0.851674	-4.20891	2.56608e-05	0.000522558		Bcl6__chr16	-4.9302	1.85e-11
ENSG00000068985	PAGE1	219.414	11.4946	1.48946	7.7173	1.18816e-14	5.05027e-12		ENSG00000155495	MAGEC1	65.6672	4.1392	1.57689	2.62492	0.00866691	0.0522234		9430076C15Rik__chr6	-4.93598	0.00464773
ENSG00000101951	PAGE4	90.7548	10.2226	4.22092	2.42188	0.0154404	0.077539		ENSG00000102081	FMR1	111.347	-2.76847	0.92583	-2.99026	0.0027874	0.0220988		Olfr613__chr7	-4.97332	0.000438679
ENSG00000187690	CXorf67	60.5748	7.55163	1.90406	3.96608	7.30647e-05	0.00123339		ENSG00000156009	MAGEA8	10.2018	6.62605	2.71814	2.43772	0.0147803	0.0767712		Etv1__chr12	-5.04666	0.00406312
ENSG00000179222	MAGED1	943.335	3.15486	0.794401	3.97136	7.14621e-05	0.0012127		ENSG00000102287	GABRE	128.082	-2.52557	0.819881	-3.08041	0.00206713	0.0177414		Pisd-ps1__chr11	-5.04942	3.88e-12
ENSG00000187243	MAGED4B	49.0101	6.35144	1.24734	5.09201	3.54293e-07	1.69743e-05		ENSG00000221867	MAGEA3	705.995	12.8203	4.20739	3.0471	0.00231064	0.0193022		Gm20362__chr6	-5.06106	3.26e-06
ENSG00000154545	MAGED4	50.3432	9.37366	1.54099	6.08289	1.18035e-09	1.34018e-07		ENSG00000183305	MAGEA2B	68.4809	9.41213	1.81328	5.19066	2.09554e-07	9.71722e-06		Zc3h6__chr2	-5.06388	9.01e-07
ENSG00000204379	XAGE1A	1341.14	13.1372	1.37325	9.56652	1.10564e-21	1.52735e-18		ENSG00000198930	CSAG1	111.661	8.08142	1.54852	5.21881	1.80073e-07	8.47296e-06		6030440G07Rik__chr12	-5.09092	0.00410092
ENSG00000204382	XAGE1B	1356.75	12.2193	1.29144	9.4618	3.02684e-21	3.58399e-18		ENSG00000213401	MAGEA12	399.701	11.8527	4.42758	2.67702	0.00742804	0.0463832		Vmn1r58__chr7	-5.12383	0.00283904
ENSG00000187754	SSX7	11.0302	7.18058	2.00998	3.57246	0.000353637	0.00450249		ENSG00000268606	MAGEA2	68.7836	7.9681	1.6364	4.86929	1.12001e-06	3.87834e-05		Gm6251__chr10	-5.13456	0.000138235
ENSG00000241476	SSX2	34.9608	6.58148	1.30398	5.04724	4.48239e-07	2.04696e-05		ENSG00000197172	MAGEA6	685.929	9.99744	1.10534	9.04467	1.50114e-19	7.06328e-17		Gm7609__chr1	-5.14045	5.6e-06
ENSG00000268447	SSX2B	31.458	7.08236	1.49488	4.73774	2.16115e-06	7.32624e-05		ENSG00000198681	MAGEA1	347.787	8.04523	1.39924	5.74971	8.93965e-09	6.44218e-07		Rorb__chr19	-5.16023	0.00297588
ENSG00000072501	SMC1A	234.149	-1.69414	0.664835	-2.54821	0.0108278	0.0596321		ENSG00000182492	BGN	381.486	-4.98666	1.05422	-4.73018	2.2432e-06	6.9683e-05		Slfn8__chr11	-5.20278	0.00293311
ENSG00000086758	HUWE1	319.698	-1.78415	0.66605	-2.6787	0.00739081	0.0452762		ENSG00000185825	BCAP31	3955.19	2.48349	0.628634	3.95061	7.79538e-05	0.00130724		Lrrc45__chr11	-5.2939	1.05e-05
ENSG00000172943	PHF8	125.802	-2.82895	1.01668	-2.78252	0.00539384	0.0358659		ENSG00000089820	ARHGAP4	313.776	1.6299	0.679372	2.39912	0.0164343	0.0827041		A130077B15Rik__chr10	-5.3204	0.00180789
ENSG00000196632	WNK3	75.8596	-3.87156	0.845693	-4.57797	4.69508e-06	0.000135298		ENSG00000102030	NAA10	453.51	1.9895	0.669534	2.97146	0.00296384	0.0231974		Mageb16-ps1__chrX	-5.33625	0.000993016
ENSG00000102316	MAGED2	430.981	2.18908	0.719095	3.04422	0.00233283	0.0190405		ENSG00000147403	RPL10	6742.3	1.56084	0.584198	2.67176	0.00754538	0.0469894		Gm21319__chr12	-5.46864	0.00154279
ENSG00000158571	PFKFB1	38.9346	-3.25907	1.10123	-2.95948	0.00308154	0.023411		ENSG00000071553	ATP6AP1	3267.25	2.39879	0.62685	3.82675	0.000129848	0.00197463		Cacna2d1__chr5	-5.51946	0.00163953
ENSG00000238269	PAGE2B	565.665	11.8021	2.88769	4.08703	4.36931e-05	0.000828718		ENSG00000160211	G6PD	534.339	3.47823	0.864233	4.02464	5.70618e-05	0.00101671		Cxcr2__chr1	-5.64381	1.87e-09
ENSG00000234068	PAGE2	584.661	12.9097	3.90658	3.30461	0.000951103	0.00965184		ENSG00000268651	CTAG1A	18.8518	4.43464	1.9178	2.31236	0.0207581	0.0978167		Gm14327__chr2	-5.72702	2.82e-05
ENSG00000158639	PAGE5	613.795	11.9279	2.6729	4.46255	8.099e-06	0.000211182		ENSG00000184033	CTAG1B	19.0654	4.50425	1.71436	2.62737	0.00860473	0.051927		Gm3002__chr14	-5.92328	0.000826262
ENSG00000165591	FAAH2	66.8403	-3.91831	0.905566	-4.32692	1.51209e-05	0.000353041		ENSG00000126890	CTAG2	75.8708	5.67685	1.31202	4.3268	1.51292e-05	0.000334378		Col27a1__chr4	-6.18153	2.03e-09
ENSG00000169083	AR	286.85	-5.9366	0.860183	-6.90155	5.14374e-12	1.16805e-09		ENSG00000160219	GAB3	22.3447	-5.20422	1.94525	-2.67534	0.00746532	0.0465978		Naaa__chr5	-6.25526	2.32e-10
ENSG00000079482	OPHN1	249.905	-3.02621	0.947368	-3.19433	0.00140156	0.0129506		ENSG00000277203	F8A1	27.7008	-4.29517	1.7043	-2.52019	0.0117291	0.0649281		4933438K21Rik__chr4	-6.73566	2.58e-05
ENSG00000147168	IL2RG	690.541	7.03117	1.55135	4.53229	5.83471e-06	0.000160668		ENSG00000155959	VBP1	770.397	3.29102	0.653923	5.03274	4.83525e-07	1.96331e-05		Palm2__chr4	-7.47445	1.19e-06
ENSG00000169562	GJB1	823.637	-1.73512	0.652553	-2.65898	0.00783785	0.0471266		ENSG00000277150	F8A3	25.337	-3.46113	1.42405	-2.43048	0.0150787	0.0778913		1700047E10Rik__chr14	-8.00248	5.59e-07
ENSG00000198034	RPS4X	5253.57	2.94133	0.950345	3.09501	0.00196803	0.0167733		ENSG00000104714	ERICH1	56.9662	-2.59394	1.1039	-2.34979	0.0187839	0.0913112
ENSG00000147099	HDAC8	134.09	1.80363	0.761261	2.36927	0.0178233	0.086369		ENSG00000173281	PPP1R3B	533.7	-2.23628	0.868071	-2.57615	0.00999085	0.0579527
ENSG00000204116	CHIC1	60.6543	-3.66636	1.0907	-3.36148	0.000775256	0.00820653		ENSG00000175806	MSRA	148.933	-2.55805	0.799994	-3.19759	0.00138581	0.013003
ENSG00000147100	SLC16A2	164.108	-2.59904	1.10304	-2.35626	0.0184599	0.0883654		ENSG00000079459	FDFT1	3214.9	2.33713	0.610088	3.83081	0.00012772	0.00194783
ENSG00000085224	ATRX	340.328	-2.39807	0.742248	-3.23082	0.00123434	0.0118071		ENSG00000164741	DLC1	161.107	-2.94699	0.778152	-3.78716	0.000152379	0.00226768
ENSG00000226784	PGAM4	170.774	3.93947	0.75803	5.19699	2.02541e-07	1.06251e-05		ENSG00000104723	TUSC3	146.124	5.25991	0.918491	5.72668	1.02413e-08	7.2496e-07
ENSG00000102144	PGK1	4184.65	2.78243	0.815035	3.41387	0.000640467	0.00710644		ENSG00000038945	MSR1	52.548	-4.34803	1.14744	-3.78934	0.000151048	0.00225207
ENSG00000173198	CYSLTR1	171.538	-2.65252	0.986698	-2.68828	0.00718215	0.0442926		ENSG00000003989	SLC7A2	502.579	-3.35948	1.03175	-3.2561	0.00112955	0.0110659
ENSG00000198157	HMGN5	48.175	-3.46919	0.896275	-3.87068	0.000108533	0.00171022		ENSG00000078674	PCM1	491.126	-2.35997	0.675697	-3.49265	0.000478255	0.00561718
ENSG00000155008	APOOL	113.308	-1.69098	0.689882	-2.45112	0.0142412	0.072923		ENSG00000156011	PSD3	182.178	-3.78439	1.14489	-3.30546	0.000948205	0.00961914
ENSG00000179083	FAM133A	15.7485	7.70469	1.99885	3.85456	0.00011594	0.00179452		ENSG00000104611	SH2D4A	176.318	-1.96486	0.767486	-2.56012	0.0104635	0.0596984
ENSG00000147202	DIAPH2	108.412	-4.32684	0.763739	-5.66534	1.46733e-08	1.13135e-06		ENSG00000036565	SLC18A1	277.041	6.46076	1.66199	3.88737	0.000101336	0.00162769
ENSG00000102362	SYTL4	41.7037	-2.73804	0.944599	-2.89863	0.00374803	0.0272505		ENSG00000147443	DOK2	16.766	-7.5013	2.34754	-3.19539	0.00139642	0.0130566
ENSG00000241343	RPL36A	2122.64	2.99483	0.826834	3.62205	0.000292281	0.00383015		ENSG00000104635	SLC39A14	1125.08	-1.62392	0.626415	-2.5924	0.00953097	0.0559136
ENSG00000257529	RPL36A-HNRNPH2	2076.33	3.0598	0.834666	3.6659	0.000246473	0.00331369		ENSG00000120907	ADRA1A	145.504	-2.65372	0.846067	-3.13653	0.00170959	0.0153136
ENSG00000196440	ARMCX4	22.3119	-3.36912	1.11943	-3.00968	0.00261521	0.0208125		ENSG00000120899	PTK2B	81.4233	-3.14795	0.934052	-3.37021	0.000751119	0.00799494
ENSG00000184905	TCEAL2	97.8221	6.94615	1.36113	5.10324	3.33883e-07	1.61398e-05		ENSG00000120915	EPHX2	765.522	-2.29115	0.722626	-3.17059	0.00152129	0.0139871
ENSG00000184515	BEX5	55.4187	4.82149	1.4152	3.40694	0.000656965	0.00721704		ENSG00000168078	PBK	60.3657	4.13021	1.64439	2.5117	0.012015	0.0661309
ENSG00000102409	BEX4	159.261	3.54233	1.42245	2.49031	0.0127633	0.0672941		ENSG00000186918	ZNF395	129.652	-2.75908	0.81615	-3.3806	0.000723268	0.00772419
ENSG00000180964	TCEAL8	371.395	2.45326	0.857709	2.86025	0.00423306	0.0298984		ENSG00000214050	FBXO16	83.1395	-3.00615	0.917151	-3.2777	0.00104657	0.0104383
ENSG00000133134	BEX2	108.558	5.12889	1.45913	3.51504	0.000439683	0.00530467		ENSG00000197892	KIF13B	98.4965	-2.98434	0.985243	-3.02904	0.00245329	0.0202621
ENSG00000166681	BEX3	1555.28	3.82932	0.831757	4.6039	4.14659e-06	0.000122528		ENSG00000104695	PPP2CB	123.361	-2.13641	0.912031	-2.34247	0.0191565	0.0927278
ENSG00000133138	TBC1D8B	391.752	-3.20454	0.937647	-3.41765	0.000631651	0.00703216		ENSG00000157168	NRG1	53.7659	-5.64118	1.95485	-2.88574	0.00390498	0.028513
ENSG00000165376	CLDN2	716.203	2.21798	0.76008	2.91809	0.00352184	0.0260515		ENSG00000187840	EIF4EBP1	636.791	2.58872	0.6361	4.06968	4.70777e-05	0.000868685
ENSG00000157514	TSC22D3	129.786	-2.08995	0.761894	-2.7431	0.00608623	0.0393033		ENSG00000156735	BAG4	94.7811	-2.80394	0.953596	-2.94039	0.00327804	0.0250592
ENSG00000101843	PSMD10	1161.96	2.6705	0.563378	4.74016	2.13551e-06	7.25416e-05		ENSG00000168615	ADAM9	68.5981	3.11992	0.984604	3.1687	0.00153121	0.0140702
ENSG00000197565	COL4A6	15.1229	5.81045	2.02846	2.86446	0.00417726	0.0295634		ENSG00000197140	ADAM32	49.0449	-5.337	1.43923	-3.70824	0.000208705	0.00292625
ENSG00000077264	PAK3	72.3327	3.32089	1.18748	2.79659	0.00516453	0.0348727		ENSG00000176907	C8orf4	258.385	-4.01322	1.62655	-2.46731	0.0136132	0.0724889
ENSG00000102024	PLS3	524.385	-2.2016	0.931136	-2.36442	0.0180582	0.087071		ENSG00000083168	KAT6A	157.233	-3.93985	0.828922	-4.75299	2.00433e-06	6.40025e-05
ENSG00000268104	SLC6A14	44.8992	6.06059	1.53522	3.94771	7.89015e-05	0.00131189		ENSG00000254673	AC110275.1	46.8571	2.61993	1.10215	2.37711	0.017449	0.0866922
ENSG00000204019	CT83	98.7207	10.3408	1.67599	6.17	6.82917e-10	8.38572e-08		ENSG00000221869	CEBPD	310.489	-4.56663	0.728224	-6.27091	3.58937e-10	3.72875e-08
ENSG00000131725	WDR44	48.426	-3.54069	1.02659	-3.44897	0.000562728	0.00644667		ENSG00000104738	MCM4	341.74	1.95217	0.833652	2.34171	0.0191954	0.0928602
ENSG00000005022	SLC25A5	2763.35	2.37195	0.610251	3.88684	0.000101559	0.00161723		ENSG00000169139	UBE2V2	706.9	2.01618	0.696002	2.8968	0.00376995	0.027821
ENSG00000125354	2006-09-01	61.6974	-3.30416	1.12844	-2.92809	0.0034105	0.0253865		ENSG00000120992	LYPLA1	577.5	1.51729	0.641264	2.36609	0.017977	0.0886002
ENSG00000203989	RHOXF2B	268.157	11.7842	1.56191	7.5447	4.53324e-14	1.59888e-11		ENSG00000137547	MRPL15	324.225	1.5633	0.676865	2.30963	0.0209089	0.0983571
ENSG00000131721	RHOXF2	276.081	9.33819	1.29022	7.23765	4.5651e-13	1.32764e-10		ENSG00000008988	RPS20	4384.92	2.23167	0.586811	3.80305	0.000142927	0.00214297
ENSG00000171155	C1GALT1C1	248.632	2.58473	0.892764	2.8952	0.00378922	0.0274391		ENSG00000171316	CHD7	156.852	-2.51798	0.772581	-3.25918	0.00111733	0.0109663
ENSG00000230347	CT47A8	15.1087	7.63003	2.7063	2.81935	0.00481203	0.0329352		ENSG00000137563	GGH	6473.85	3.84033	0.889181	4.31896	1.5677e-05	0.000344033
ENSG00000224089	CT47A10	9.27491	6.92143	2.57775	2.68507	0.00725149	0.0446704		ENSG00000066855	MTFR1	78.6343	-2.17083	0.930822	-2.33216	0.0196922	0.0946054
ENSG00000226600	CT47A9	8.88749	6.86248	2.97888	2.30371	0.0212387	0.0975813		ENSG00000147576	ADHFE1	150.46	-2.70188	0.857899	-3.14942	0.00163596	0.0148116
ENSG00000226023	CT47A6	15.405	7.65811	2.69834	2.83809	0.00453847	0.0315051		ENSG00000175073	VCPIP1	59.8769	-2.3427	1.00062	-2.34124	0.0192198	0.0928682
ENSG00000228517	CT47A7	13.9237	7.51189	2.74125	2.74032	0.00613799	0.0395144		ENSG00000140396	NCOA2	169.41	-2.11325	0.757796	-2.78869	0.00529223	0.0356935
ENSG00000237957	CT47A5	16.59	7.76529	2.66908	2.90935	0.00362186	0.0265427		ENSG00000147604	RPL7	7633.45	2.30081	0.593256	3.87828	0.000105196	0.00167622
ENSG00000230594	CT47A4	11.2575	7.20444	2.8436	2.53356	0.0112909	0.061468		ENSG00000121039	RDH10	210.796	-1.75628	0.741905	-2.36725	0.0179206	0.0883964
ENSG00000236126	CT47A3	11.2575	7.20444	2.8436	2.53356	0.0112909	0.061468		ENSG00000154582	ELOC	424.22	2.01722	0.683829	2.94988	0.00317893	0.0244856
ENSG00000182890	GLUD2	358.319	2.42507	0.778835	3.11371	0.00184749	0.0159427		ENSG00000175606	TMEM70	317.014	1.84505	0.70499	2.61713	0.00886738	0.0531113
ENSG00000101972	STAG2	137.093	-1.77053	0.647993	-2.73232	0.00628892	0.0401739		ENSG00000154589	LY96	13.2299	-5.70783	2.32506	-2.45492	0.0140915	0.0741443
ENSG00000009694	TENM1	38.6874	-4.61271	1.48374	-3.10883	0.00187831	0.0161665		ENSG00000091656	ZFHX4	102.631	-3.10596	0.880818	-3.52622	0.00042154	0.00508662
ENSG00000147255	IGSF1	87.049	3.53498	1.0894	3.24489	0.00117495	0.0113305		ENSG00000164683	HEY1	24.5685	4.84836	1.77894	2.72543	0.00642182	0.0413259
ENSG00000076770	MBNL3	233.587	-2.8204	0.741062	-3.80589	0.000141296	0.00210446		ENSG00000205189	ZBTB10	56.6582	-3.24223	1.16371	-2.78611	0.00533443	0.0359176
ENSG00000147257	GPC3	20.6994	4.19871	1.66867	2.51619	0.0118631	0.0636955		ENSG00000076641	PAG1	149.325	-3.31844	0.798574	-4.15545	3.24646e-05	0.000634925
ENSG00000184785	SMIM10	8.17783	-5.18568	2.10168	-2.46739	0.0136101	0.0705267		ENSG00000176566	DCAF4L2	231.904	4.7325	0.821474	5.76099	8.36232e-09	6.09191e-07
ENSG00000212747	RTL8B	50.6954	2.3215	1.00739	2.30447	0.0211964	0.0975222		ENSG00000155099	TMEM55A	64.8626	4.42507	1.06547	4.15315	3.27928e-05	0.000639779
ENSG00000134590	RTL8C	426.952	1.62704	0.665856	2.44352	0.0145446	0.0740745		ENSG00000079112	CDH17	284.598	3.58386	1.37085	2.61433	0.00894032	0.0534082
ENSG00000203950	RTL8A	355.777	3.54832	0.736263	4.81937	1.44015e-06	5.35278e-05		ENSG00000164938	TP53INP1	740.006	-5.25451	0.773598	-6.7923	1.10361e-11	1.65006e-09
ENSG00000169551	CT55	8.27283	6.77067	2.18918	3.09279	0.00198283	0.0168725		ENSG00000156471	PTDSS1	514.373	2.09686	0.675722	3.10314	0.00191479	0.0166846
ENSG00000186376	ZNF75D	53.4228	-3.53533	1.05876	-3.33913	0.000840425	0.00876761		ENSG00000104341	LAPTM4B	760.704	2.37505	0.627115	3.78726	0.000152316	0.00226768
ENSG00000181433	SAGE1	9.84465	7.00651	2.38365	2.93941	0.00328837	0.0247045		ENSG00000132561	MATN2	195.108	-2.1611	0.755725	-2.85964	0.00424121	0.030372
ENSG00000129675	ARHGEF6	23.8105	-6.73101	1.7777	-3.78637	0.000152866	0.00224253		ENSG00000156482	RPL30	5652.92	2.09815	0.605898	3.46288	0.000534428	0.00609429
ENSG00000101981	F9	564.497	-7.90341	1.03498	-7.63629	2.23573e-14	8.82423e-12		ENSG00000132549	VPS13B	149.731	-2.88372	0.785345	-3.67191	0.000240741	0.00326665
ENSG00000101974	ATP11C	312.099	-4.51811	0.80956	-5.58094	2.39219e-08	1.73168e-06		ENSG00000147669	POLR2K	538.498	2.36338	0.647193	3.65175	0.000260464	0.00348403
ENSG00000227234	SPANXB1	8.88749	6.86248	2.97888	2.30371	0.0212387	0.0975813		ENSG00000186106	ANKRD46	226.094	2.42839	0.742362	3.27117	0.00107105	0.0106295
ENSG00000196406	SPANXD	8.88749	6.86248	2.97888	2.30371	0.0212387	0.0975813		ENSG00000070756	PABPC1	8128.99	2.9014	0.618662	4.68981	2.73465e-06	8.09103e-05
ENSG00000155495	MAGEC1	32.2017	8.7251	1.62854	5.35762	8.43266e-08	5.10176e-06		ENSG00000164924	YWHAZ	4421.17	2.64601	0.616842	4.28961	1.78991e-05	0.000386436
ENSG00000046774	MAGEC2	308.598	11.9881	1.40537	8.5302	1.46095e-17	1.10082e-14		ENSG00000120963	ZNF706	746.653	2.07805	0.624496	3.32756	0.0008761	0.00906073
ENSG00000102081	FMR1	118.207	-2.80454	0.823824	-3.40429	0.00066336	0.00725364		ENSG00000164933	SLC25A32	390.454	3.28014	0.68496	4.78881	1.67771e-06	5.45528e-05
ENSG00000241489	AC244197.3	77.6777	-2.62983	1.01895	-2.58092	0.0098538	0.055864		ENSG00000164934	DCAF13	581.805	2.50447	0.818227	3.06085	0.00220712	0.0185979
ENSG00000156009	MAGEA8	6.98357	5.41965	2.17561	2.49109	0.0127351	0.0671895		ENSG00000147647	DPYS	483.766	-2.87496	0.911838	-3.15293	0.00161638	0.0146925
ENSG00000013619	MAMLD1	9.12052	4.26742	1.85141	2.30496	0.0211687	0.0974488		ENSG00000104408	EIF3E	1143.84	2.12796	0.670955	3.17153	0.00151637	0.013958
ENSG00000063601	MTMR1	43.3566	-2.48439	0.848873	-2.9267	0.00342584	0.0254664		ENSG00000120533	ENY2	618.696	1.52976	0.636066	2.40504	0.0161707	0.0818423
ENSG00000130032	PRRG3	12.0134	-4.10106	1.72771	-2.3737	0.0176111	0.0857382		ENSG00000147642	SYBU	126.515	-3.14998	1.02649	-3.06869	0.00215	0.0182956
ENSG00000221867	MAGEA3	453.237	12.5434	1.48883	8.42495	3.6091e-17	2.39312e-14		ENSG00000104447	TRPS1	23.3326	-5.41013	1.72506	-3.13619	0.00171158	0.0153228
ENSG00000183305	MAGEA2B	44.0313	9.18328	1.61832	5.67458	1.39033e-08	1.08204e-06		ENSG00000147677	EIF3H	705.176	1.83346	0.651667	2.8135	0.00490054	0.0336783
ENSG00000198930	CSAG1	71.0625	9.8702	3.06523	3.22005	0.00128168	0.0120985		ENSG00000182197	EXT1	209.208	-2.71178	0.74723	-3.62911	0.000284402	0.00373859
ENSG00000213401	MAGEA12	255.85	11.719	1.56999	7.46435	8.37116e-14	2.72096e-11		ENSG00000184374	COLEC10	29.0521	-5.62866	2.36944	-2.37553	0.0175238	0.087019
ENSG00000268606	MAGEA2	44.2694	8.19519	1.56938	5.22192	1.7708e-07	9.43877e-06		ENSG00000136982	DSCC1	19.1914	5.6842	2.1265	2.67303	0.00751696	0.0468836
ENSG00000197172	MAGEA6	439.814	12.5	1.49441	8.36453	6.03542e-17	3.70552e-14		ENSG00000172172	MRPL13	1003.07	2.64216	0.616705	4.28432	1.83297e-05	0.000392555
ENSG00000198681	MAGEA1	221.505	11.5112	1.6018	7.18639	6.65277e-13	1.8692e-10		ENSG00000170873	MTSS1	639.396	-2.36511	0.635559	-3.72132	0.000198188	0.00279595
ENSG00000182492	BGN	351.066	-3.60864	1.17517	-3.07074	0.00213532	0.0177608		ENSG00000173334	TRIB1	296.466	-2.28047	0.736757	-3.09528	0.0019663	0.0170423
ENSG00000130829	DUSP9	14.998	3.87984	1.61558	2.40151	0.0163274	0.0805352		ENSG00000136997	MYC	206.634	2.86706	0.742686	3.8604	0.000113204	0.00177229
ENSG00000130822	PNCK	6.60866	6.4305	2.74817	2.33992	0.0192879	0.0914052		ENSG00000153310	FAM49B	253.474	2.03743	0.773459	2.63418	0.00843399	0.0511474
ENSG00000185825	BCAP31	2511.29	3.17895	0.715484	4.44308	8.86814e-06	0.000228272		ENSG00000155926	SLA	43.0496	-8.82575	1.92343	-4.58855	4.46337e-06	0.000121231
ENSG00000102030	NAA10	312.484	2.12939	0.630075	3.37958	0.000725969	0.00779429		ENSG00000008513	ST3GAL1	595.01	-1.83323	0.65187	-2.81226	0.00491948	0.0337632
ENSG00000147403	RPL10	4726.96	1.75084	0.760281	2.30288	0.0212856	0.0977429		ENSG00000123908	AGO2	174.679	-2.4151	0.75416	-3.20236	0.00136304	0.0127969
ENSG00000071553	ATP6AP1	2044.71	3.23423	0.66342	4.87509	1.0876e-06	4.28245e-05		ENSG00000130193	THEM6	463.931	1.65091	0.659439	2.50351	0.0122969	0.0672795
ENSG00000160211	G6PD	341.316	4.50521	1.05837	4.25673	2.0744e-05	0.000458653		ENSG00000180155	LYNX1	214.338	-2.48639	0.762376	-3.26137	0.00110877	0.0108956
ENSG00000268651	CTAG1A	11.1894	7.19284	2.10388	3.41885	0.000628862	0.00701053		ENSG00000147813	NAPRT	725.346	-1.81103	0.670174	-2.70233	0.00688554	0.0435912
ENSG00000184033	CTAG1B	11.8959	7.28305	2.02692	3.59316	0.000326698	0.0042211		ENSG00000179950	PUF60	1467.11	2.38084	0.696578	3.41791	0.000631041	0.00695755
ENSG00000126890	CTAG2	47.5609	9.28563	1.62709	5.70691	1.15045e-08	9.16875e-07		ENSG00000185189	NRBP2	178.81	-2.82494	0.754392	-3.74466	0.00018064	0.00258487
ENSG00000185010	F8	71.7874	-2.67752	0.771748	-3.46942	0.000521578	0.00605476		ENSG00000261150	EPPK1	41.442	-8.56116	1.92494	-4.44749	8.68802e-06	0.000210592
ENSG00000277203	F8A1	36.353	-4.08753	1.18364	-3.45337	0.00055363	0.00635563		ENSG00000178209	PLEC	326.899	-1.89695	0.783305	-2.42172	0.0154472	0.0791559
ENSG00000155959	VBP1	568.666	2.5087	0.65802	3.81249	0.000137572	0.00205823		ENSG00000178814	OPLAH	180.181	-1.83373	0.756002	-2.42556	0.0152846	0.0786745
ENSG00000277150	F8A3	36.37	-4.10807	1.06087	-3.87236	0.000107786	0.0017045		ENSG00000197858	GPAA1	1680.35	1.91653	0.599658	3.19604	0.00139329	0.0130426
ENSG00000176595	KBTBD11	20.3722	-6.12743	1.97573	-3.10136	0.00192637	0.016469		ENSG00000179091	CYC1	3709.56	2.0195	0.644027	3.13574	0.00171418	0.0153375
ENSG00000206047	DEFA1	8.62753	-6.56101	2.28	-2.87763	0.00400676	0.0286417		ENSG00000179632	MAF1	511.599	2.21797	0.682538	3.24959	0.00115573	0.0112798
ENSG00000240247	DEFA1B	13.6951	-7.22724	2.07124	-3.48934	0.000484218	0.00571308		ENSG00000185803	SLC52A2	188.774	1.84036	0.753197	2.4434	0.0145494	0.0758676
ENSG00000239839	DEFA3	14.0719	-7.26597	2.08451	-3.4857	0.000490858	0.00578319		ENSG00000160949	TONSL	143.562	2.1458	0.782608	2.74185	0.00610941	0.0397795
ENSG00000175806	MSRA	145.781	-2.72185	0.82231	-3.31	0.000932944	0.00950548		ENSG00000167701	GPT	594.052	-4.47624	0.675584	-6.62573	3.45532e-11	4.49417e-09
ENSG00000136574	GATA4	152.258	-2.69185	0.669385	-4.02138	5.78587e-05	0.00104594		ENSG00000213563	C8orf82	104.223	-3.87832	1.00426	-3.86187	0.000112524	0.00176659
ENSG00000079459	FDFT1	2024.01	3.05742	0.662311	4.61629	3.90654e-06	0.000116682		ENSG00000161016	RPL8	12175.8	2.96764	0.599106	4.95344	7.29134e-07	2.71904e-05
ENSG00000164741	DLC1	134.754	-2.70481	0.770817	-3.50902	0.00044976	0.00539485		ENSG00000172785	CBWD1	289.807	1.87296	0.690143	2.71387	0.00665031	0.0425396
ENSG00000104723	TUSC3	113.934	2.60385	1.08479	2.40034	0.0163799	0.0807164		ENSG00000107104	KANK1	400.209	-1.9102	0.660635	-2.89147	0.0038345	0.0281283
ENSG00000038945	MSR1	48.0397	-4.22994	1.28902	-3.2815	0.00103255	0.0102679		ENSG00000080503	SMARCA2	95.4073	-3.94003	1.17042	-3.36632	0.000761779	0.00807617
ENSG00000155970	MICU3	48.819	-3.8615	0.95867	-4.02798	5.62591e-05	0.00101924		ENSG00000106688	SLC1A1	56.1967	-5.05256	1.4179	-3.5634	0.000366088	0.00453355
ENSG00000003989	SLC7A2	575.481	-3.33051	0.897049	-3.71274	0.000205024	0.00286808		ENSG00000106686	SPATA6L	68.8028	-2.36429	0.961689	-2.45848	0.0139526	0.0736193
ENSG00000078674	PCM1	386.057	-1.90895	0.807196	-2.36492	0.018034	0.087071		ENSG00000183354	KIAA2026	108.034	-3.00749	0.93135	-3.22917	0.00124149	0.0119431
ENSG00000156006	NAT2	111.806	-4.30303	0.979963	-4.39101	1.12823e-05	0.000275935		ENSG00000147854	UHRF2	81.2704	-2.11009	0.905888	-2.32931	0.0198427	0.0950715
ENSG00000104611	SH2D4A	131.57	-1.82032	0.776349	-2.34471	0.0190417	0.0904974		ENSG00000153707	PTPRD	40.2478	-4.02709	1.28302	-3.13875	0.00169671	0.0152323
ENSG00000036565	SLC18A1	182.995	10.3307	3.44718	2.99686	0.00272777	0.0214712		ENSG00000107186	MPDZ	148.948	-3.71535	1.01487	-3.6609	0.000251331	0.00338451
ENSG00000147443	DOK2	40.7231	-8.81484	1.93098	-4.56496	4.99597e-06	0.000142055		ENSG00000147862	NFIB	147.146	-3.27116	0.935315	-3.49739	0.000469828	0.00553484
ENSG00000168476	REEP4	108.893	2.38559	0.803604	2.96862	0.00299141	0.0229046		ENSG00000044459	CNTLN	121.378	-2.56206	0.864695	-2.96296	0.00304698	0.0237089
ENSG00000104635	SLC39A14	1551.7	-2.42741	0.870039	-2.79	0.00527081	0.0353059		ENSG00000155876	RRAGA	861.685	3.61591	0.729921	4.95383	7.27666e-07	2.71904e-05
ENSG00000173535	TNFRSF10C	16.7545	-3.06645	1.33465	-2.29757	0.0215862	0.0988355		ENSG00000137154	RPS6	4578.64	1.79075	0.595523	3.00702	0.00263824	0.0212659
ENSG00000092964	DPYSL2	114.353	-2.98163	0.936801	-3.18278	0.00145869	0.0133743		ENSG00000147889	CDKN2A	45.3115	4.77641	1.75131	2.72734	0.00638478	0.0411372
ENSG00000120907	ADRA1A	82.5376	-1.85994	0.73309	-2.53712	0.0111767	0.0609833		ENSG00000120156	TEK	15.0515	-6.80182	2.46618	-2.75803	0.005815	0.0382161
ENSG00000120885	CLU	30503.7	2.80123	1.19092	2.35216	0.0186649	0.0891409		ENSG00000086062	B4GALT1	619.923	-1.89429	0.631838	-2.99805	0.0027171	0.0216625
ENSG00000147419	CCDC25	177.304	-1.68972	0.728128	-2.32064	0.0203064	0.0945827		ENSG00000165006	UBAP1	162.761	-2.08267	0.774867	-2.68778	0.00719297	0.0451799
ENSG00000168078	PBK	31.789	4.80978	1.43924	3.34189	0.000832113	0.00869731		ENSG00000186638	KIF24	39.5161	-3.09853	1.17351	-2.64039	0.00828114	0.0503924
ENSG00000186918	ZNF395	128.513	-2.7956	0.781113	-3.579	0.000344913	0.00441515		ENSG00000164976	KIAA1161	490.641	-2.09565	0.74306	-2.8203	0.00479785	0.0331683
ENSG00000214050	FBXO16	65.1158	-2.70852	0.876492	-3.09018	0.00200035	0.0169522		ENSG00000168913	ENHO	206.863	-5.74079	0.84693	-6.77835	1.21555e-11	1.80059e-09
ENSG00000147421	HMBOX1	106.173	-3.03278	0.890732	-3.40482	0.000662068	0.00724429		ENSG00000147955	SIGMAR1	6349.5	3.35338	0.586755	5.71514	1.09615e-08	7.65773e-07
ENSG00000197892	KIF13B	80.7735	-2.60965	0.963773	-2.70774	0.00677434	0.0424568		ENSG00000213930	GALT	675.728	-2.20115	0.629008	-3.4994	0.0004663	0.00550137
ENSG00000104695	PPP2CB	157.633	-2.47095	0.825137	-2.99459	0.00274812	0.0215855		ENSG00000258728	AL162231.3	235.202	-2.13849	0.711538	-3.00545	0.00265187	0.021337
ENSG00000165392	WRN	33.4981	-3.05398	0.988644	-3.08906	0.00200791	0.0169909		ENSG00000137070	IL11RA	202.756	-2.51881	0.756536	-3.32939	0.000870362	0.00901817
ENSG00000129696	TTI2	109.111	-1.73862	0.708965	-2.45234	0.0141932	0.0727299		ENSG00000172724	CCL19	10.7352	-6.54407	2.72075	-2.40525	0.0161615	0.0818423
ENSG00000147471	PLPBP	275.367	-1.55529	0.599017	-2.59641	0.00942034	0.0540537		ENSG00000165280	VCP	1661.78	2.12158	0.606134	3.50019	0.000464926	0.00549204
ENSG00000156735	BAG4	122.911	-3.17311	0.797765	-3.9775	6.96434e-05	0.00119141		ENSG00000165283	STOML2	1657.43	2.72508	0.603251	4.51732	6.26281e-06	0.000160052
ENSG00000147548	NSD3	150.817	-1.69629	0.68215	-2.48669	0.0128939	0.0676398		ENSG00000137135	ARHGEF39	405.802	1.59525	0.678014	2.35282	0.0186317	0.0908948
ENSG00000197140	ADAM32	41.5586	-4.67342	1.29671	-3.60407	0.000313277	0.00405718		ENSG00000107159	CA9	404.848	3.51183	0.762266	4.60709	4.0835e-06	0.000112634
ENSG00000083168	KAT6A	98.283	-3.1748	0.877207	-3.61921	0.000295499	0.00386621		ENSG00000137076	TLN1	411.349	-2.70122	0.676063	-3.99551	6.45544e-05	0.00112499
ENSG00000104371	DKK4	1213.16	9.74691	3.7588	2.59309	0.00951185	0.0544386		ENSG00000122705	CLTA	1550.32	1.5413	0.600925	2.56489	0.0103209	0.0591172
ENSG00000221869	CEBPD	184.633	-3.86827	0.756741	-5.11175	3.1918e-07	1.55619e-05		ENSG00000165304	MELK	35.0791	3.64222	1.26324	2.88323	0.00393624	0.0286366
ENSG00000104738	MCM4	228.984	2.34909	0.859127	2.73428	0.00625169	0.0400442		ENSG00000168795	ZBTB5	85.4385	-2.86978	0.917737	-3.12702	0.00176587	0.0156946
ENSG00000169139	UBE2V2	531.525	1.78286	0.677609	2.63111	0.00851077	0.0499828		ENSG00000256966	AL513165.2	526.875	2.76945	0.644277	4.29853	1.71931e-05	0.000372704
ENSG00000023287	RB1CC1	253.973	-2.09314	0.680738	-3.07481	0.00210638	0.0175852		ENSG00000175768	TOMM5	1058.33	2.96878	0.612906	4.84377	1.27398e-06	4.32722e-05
ENSG00000164736	SOX17	13.6087	-5.94395	2.56305	-2.31909	0.0203899	0.0948382		ENSG00000255872	AL138752.2	999.25	2.68639	0.613882	4.37607	1.2084e-05	0.000280173
ENSG00000254087	LYN	95.9965	-2.37897	0.824018	-2.88704	0.00388889	0.0280044		ENSG00000107338	SHB	69.0842	-3.21636	1.04242	-3.08548	0.00203223	0.0174888
ENSG00000008988	RPS20	2887.36	2.74821	0.809209	3.39617	0.000683368	0.00740889		ENSG00000215126	CBWD6	196.289	2.26435	0.743287	3.04641	0.00231595	0.0193173
ENSG00000177182	CLVS1	134.502	-1.98713	0.777901	-2.55447	0.0106349	0.0588835		ENSG00000147996	CBWD5	297.649	1.91305	0.719481	2.65894	0.00783881	0.0484377
ENSG00000137563	GGH	4673.82	3.05642	1.06289	2.87559	0.00403279	0.0287533		ENSG00000196873	CBWD3	281.866	1.93453	0.720953	2.68329	0.00729013	0.0456825
ENSG00000066855	MTFR1	75.4528	-2.22298	0.771926	-2.87979	0.00397942	0.0285077		ENSG00000119139	TJP2	148.218	-2.54158	0.925727	-2.7455	0.00604195	0.0394045
ENSG00000147576	ADHFE1	171.509	-3.24455	0.778615	-4.16708	3.08522e-05	0.000629074		ENSG00000188647	PTAR1	148.555	-3.4272	0.925479	-3.70316	0.000212931	0.0029699
ENSG00000169085	C8orf46	36.1423	-3.35524	1.04015	-3.22571	0.00125659	0.0119438		ENSG00000119138	KLF9	251.483	-6.15824	0.896192	-6.87156	6.35017e-12	9.8631e-10
ENSG00000175073	VCPIP1	64.6783	-2.61519	0.850543	-3.07473	0.00210695	0.0175852		ENSG00000165092	ALDH1A1	4932.17	1.83711	0.670189	2.74118	0.00612192	0.0398448
ENSG00000066777	ARFGEF1	111.729	-1.69915	0.723776	-2.34762	0.0188936	0.0900513		ENSG00000135045	C9orf40	15.7028	5.39437	2.14642	2.51319	0.0119644	0.0659112
ENSG00000140396	NCOA2	136.475	-1.9064	0.730455	-2.60988	0.00905736	0.0523697		ENSG00000106733	NMRK1	181.781	-2.28158	0.888654	-2.56746	0.0102447	0.058829
ENSG00000147604	RPL7	5786.97	1.93047	0.786628	2.45411	0.0141234	0.0724841		ENSG00000135002	RFK	385.753	1.72368	0.699491	2.4642	0.0137319	0.0728776
ENSG00000121039	RDH10	194.129	-1.80007	0.64708	-2.78183	0.00540528	0.0359131		ENSG00000187210	GCNT1	21.3912	5.30872	1.82956	2.90164	0.00371216	0.0274813
ENSG00000154589	LY96	47.9458	-7.54983	1.58034	-4.77736	1.77615e-06	6.25122e-05		ENSG00000197969	VPS13A	120.252	-2.22262	0.863179	-2.57493	0.0100261	0.0580941
ENSG00000091656	ZFHX4	81.7805	-2.84008	0.747175	-3.80109	0.00014406	0.00214339		ENSG00000156052	GNAQ	199.975	-2.9122	0.73881	-3.94174	8.08913e-05	0.00134522
ENSG00000164683	HEY1	15.3828	7.65634	1.87985	4.07284	4.64433e-05	0.000868952		ENSG00000135069	PSAT1	3420.28	3.25141	0.664342	4.89418	9.87163e-07	3.51729e-05
ENSG00000205189	ZBTB10	63.8739	-3.44877	0.95287	-3.61936	0.000295338	0.00386621		ENSG00000165119	HNRNPK	2810.71	1.90416	0.610627	3.11837	0.00181855	0.0160191
ENSG00000133731	IMPA1	129.308	-1.80486	0.682565	-2.64423	0.00818778	0.0485961		ENSG00000135052	GOLM1	180.862	2.04032	0.800003	2.5504	0.0107601	0.0608052
ENSG00000104497	SNX16	46.2542	-3.87843	1.05972	-3.65986	0.000252351	0.00338175		ENSG00000083223	ZCCHC6	132.525	-3.7812	0.855406	-4.42035	9.85394e-06	0.00023424
ENSG00000123124	WWP1	423.93	-2.07671	0.598827	-3.46797	0.000524409	0.00607486		ENSG00000196730	DAPK1	253.63	-3.59855	1.0867	-3.31145	0.000928134	0.00944917
ENSG00000176566	DCAF4L2	144.228	9.28225	1.45289	6.38882	1.67167e-10	2.40796e-08		ENSG00000123975	CKS2	964.963	3.53935	0.667461	5.3027	1.141e-07	5.61651e-06
ENSG00000079102	RUNX1T1	23.0374	-4.74658	1.39388	-3.40531	0.000660889	0.00724095		ENSG00000130222	GADD45G	373.817	-5.48879	0.742571	-7.3916	1.45069e-13	2.93774e-11
ENSG00000079112	CDH17	188.189	6.60718	1.60748	4.11027	3.95194e-05	0.000766214		ENSG00000165030	NFIL3	152.374	-3.23092	0.947382	-3.41037	0.000648745	0.0071028
ENSG00000164938	TP53INP1	524.85	-4.4292	0.845584	-5.23803	1.62296e-07	8.84995e-06		ENSG00000106823	ECM2	38.4462	-3.07021	1.19397	-2.57142	0.0101281	0.058368
ENSG00000180543	TSPYL5	16.3982	-7.50552	1.9531	-3.84288	0.000121598	0.00186553		ENSG00000127084	FGD3	22.7375	-4.95597	1.8126	-2.73418	0.00625358	0.0405532
ENSG00000104341	LAPTM4B	528.379	2.43321	0.975536	2.49423	0.012623	0.0667681		ENSG00000131669	NINJ1	1106.14	1.44898	0.625381	2.31695	0.0205063	0.0971741
ENSG00000156482	RPL30	4030.53	2.07219	0.778979	2.66014	0.00781077	0.047014		ENSG00000165238	WNK2	26.6168	-3.73252	1.45073	-2.57285	0.0100864	0.0583086
ENSG00000132541	RIDA	1782.75	-2.87822	0.697008	-4.12939	3.63727e-05	0.000717798		ENSG00000048828	FAM120A	250.073	-2.36867	0.806983	-2.93522	0.00333312	0.0253678
ENSG00000132549	VPS13B	162.529	-3.12426	0.709472	-4.40364	1.06451e-05	0.000264563		ENSG00000148110	MFSD14B	89.4836	-2.11383	0.912803	-2.31575	0.0205717	0.0973656
ENSG00000164919	COX6C	1581.87	1.53469	0.668399	2.29606	0.0216723	0.0990716		ENSG00000130948	HSD17B3	49.3337	-3.42881	1.16447	-2.94451	0.00323467	0.0248074
ENSG00000070756	PABPC1	5927.33	2.45276	0.712831	3.44088	0.000579832	0.00658348		ENSG00000119508	NR4A3	11.4261	-6.95699	2.61918	-2.65618	0.00790322	0.0487228
ENSG00000164924	YWHAZ	3066.51	2.60301	0.664306	3.91839	8.91415e-05	0.001453		ENSG00000136897	MRPL50	407.07	2.78638	0.671146	4.15167	3.30052e-05	0.000643139
ENSG00000120963	ZNF706	537.144	2.02356	0.838151	2.41431	0.0157649	0.0784363		ENSG00000136870	ZNF189	128.545	-3.00579	0.850988	-3.53211	0.000412254	0.00500397
ENSG00000104517	UBR5	124.38	-2.43514	0.694209	-3.50779	0.000451848	0.00540565		ENSG00000136872	ALDOB	13304.3	-3.08416	1.28318	-2.40353	0.0162378	0.082005
ENSG00000164933	SLC25A32	285.427	2.60929	0.605083	4.31228	1.61577e-05	0.000371681		ENSG00000165029	ABCA1	267.193	-2.95702	0.729248	-4.05489	5.01589e-05	0.000912904
ENSG00000164934	DCAF13	374.671	3.39487	0.801859	4.23375	2.29824e-05	0.000496068		ENSG00000119318	RAD23B	165.684	-2.18737	0.794151	-2.75435	0.00588097	0.0386222
ENSG00000147647	DPYS	414.028	-3.06484	0.898024	-3.41287	0.000642835	0.0071154		ENSG00000119326	CTNNAL1	139.675	2.07822	0.823776	2.52279	0.0116426	0.0645801
ENSG00000164830	OXR1	150.753	-1.85852	0.802157	-2.3169	0.0205093	0.0952847		ENSG00000157654	PALM2-AKAP2	174.077	-3.47828	0.784813	-4.43198	9.33699e-06	0.000223948
ENSG00000147642	SYBU	95.8209	-3.55732	1.01013	-3.52164	0.000428887	0.00520092		ENSG00000241978	AKAP2	167.398	-3.54466	0.796642	-4.4495	8.60723e-06	0.000209016
ENSG00000104447	TRPS1	12.7853	-4.60624	1.81034	-2.5444	0.0109465	0.0600066		ENSG00000136810	TXN	3595.6	2.26667	0.703995	3.21973	0.00128312	0.0122405
ENSG00000147677	EIF3H	522.141	1.74283	0.714734	2.43843	0.0147514	0.0748038		ENSG00000059769	DNAJC25	142.568	-2.48686	0.965015	-2.57702	0.00996576	0.0578282
ENSG00000182197	EXT1	251.021	-2.97945	0.955119	-3.11945	0.00181188	0.0157502		ENSG00000244115	DNAJC25-GNG10	342.413	2.16136	0.82467	2.62088	0.00877042	0.0526884
ENSG00000184374	COLEC10	94.1941	-10.0192	1.87569	-5.34159	9.21347e-08	5.37788e-06		ENSG00000242616	GNG10	327.111	2.47751	0.785905	3.15243	0.00161919	0.0147014
ENSG00000136982	DSCC1	12.0336	7.31779	2.15652	3.39334	0.000690458	0.00746497		ENSG00000148154	UGCG	87.9344	-2.52449	0.934804	-2.70055	0.00692241	0.0437899
ENSG00000187955	COL14A1	32.106	-8.46395	2.20262	-3.84267	0.000121702	0.00186553		ENSG00000119314	PTBP3	68.5392	-2.34229	0.957411	-2.44648	0.0144258	0.0754935
ENSG00000172172	MRPL13	716.894	2.42433	0.678295	3.57416	0.000351357	0.00447689		ENSG00000148218	ALAD	543.029	-3.42714	0.693907	-4.9389	7.85636e-07	2.91403e-05
ENSG00000172164	SNTB1	612.331	-1.8928	0.800861	-2.36345	0.0181057	0.0872493		ENSG00000157657	ZNF618	25.4856	-3.91504	1.51331	-2.58707	0.00967956	0.0565985
ENSG00000165156	ZHX1	205.525	-2.20433	0.715344	-3.08149	0.00205967	0.0173052		ENSG00000196739	COL27A1	141.655	-2.8218	0.839514	-3.36123	0.000775951	0.00819384
ENSG00000156795	WDYHV1	51.5638	3.51676	0.990762	3.54955	0.000385894	0.00482426		ENSG00000229314	ORM1	19687.9	-3.57318	0.603172	-5.92399	3.14222e-09	2.6319e-07
ENSG00000170873	MTSS1	625.225	-2.44046	0.697907	-3.49683	0.000470821	0.00558283		ENSG00000228278	ORM2	10826	-2.68109	0.58557	-4.5786	4.68092e-06	0.000125793
ENSG00000104549	SQLE	705.576	3.29278	0.959735	3.43093	0.000601516	0.00678322		ENSG00000136888	ATP6V1G1	828.656	2.06681	0.626149	3.30082	0.000964011	0.00975474
ENSG00000153310	FAM49B	173.049	2.39862	0.759361	3.15874	0.00158454	0.0142523		ENSG00000148219	ASTN2	139.392	-2.21215	0.809141	-2.73394	0.00625809	0.0405634
ENSG00000155926	SLA	29.4227	-8.34602	1.80709	-4.61849	3.86537e-06	0.000116234		ENSG00000136869	TLR4	26.6062	-5.12729	1.94631	-2.63437	0.00842944	0.0511392
ENSG00000169427	KCNK9	6.19879	6.34766	2.38793	2.65823	0.00785523	0.047214		ENSG00000136861	CDK5RAP2	184.769	-2.39459	0.967345	-2.47542	0.0133079	0.0712039
ENSG00000104472	CHRAC1	116.327	1.76391	0.693418	2.54379	0.0109655	0.0600713		ENSG00000106780	MEGF9	195.303	-2.39654	0.738344	-3.24582	0.00117111	0.0113963
ENSG00000130193	THEM6	311.442	2.06446	0.829789	2.48793	0.0128488	0.0675531		ENSG00000106804	C5	1834.77	-3.65309	0.748223	-4.88235	1.04829e-06	3.66168e-05
ENSG00000250571	GLI4	25.2505	2.9107	1.13976	2.55378	0.0106561	0.0589014		ENSG00000119397	CNTRL	29.9137	-3.33579	1.34078	-2.48795	0.0128482	0.0693993
ENSG00000179950	PUF60	963.31	2.90774	0.664923	4.37304	1.22526e-05	0.00029522		ENSG00000148180	GSN	592.41	-2.83065	1.04157	-2.71768	0.00657406	0.042153
ENSG00000185189	NRBP2	101.074	-1.99893	0.866192	-2.30772	0.0210149	0.0968483		ENSG00000148175	STOM	898.67	-2.22395	0.85099	-2.61337	0.00896538	0.053498
ENSG00000178719	GRINA	1579.4	1.79267	0.761745	2.35338	0.0186039	0.0889006		ENSG00000171448	ZBTB26	17.0369	4.91162	2.09214	2.34765	0.018892	0.0917252
ENSG00000197858	GPAA1	1095.89	2.46589	0.556582	4.43041	9.4055e-06	0.000240239		ENSG00000011454	RABGAP1	115.126	-2.92124	0.83661	-3.49176	0.000479841	0.00562381
ENSG00000179091	CYC1	2318.65	3.06975	0.821615	3.73624	0.000186792	0.00265107		ENSG00000148204	CRB2	17.451	-4.01023	1.70226	-2.35582	0.0184819	0.0904202
ENSG00000179632	MAF1	399.903	1.64248	0.670265	2.4505	0.014266	0.0730123		ENSG00000136942	RPL35	3663.12	2.01288	0.599636	3.35683	0.00078842	0.00830358
ENSG00000185000	DGAT1	547.844	2.65335	0.989541	2.6814	0.00733149	0.044996		ENSG00000044574	HSPA5	3742.7	1.65477	0.593051	2.79026	0.00526654	0.0355503
ENSG00000185803	SLC52A2	118.595	2.69774	0.977021	2.76119	0.00575915	0.0376225		ENSG00000167081	PBX3	103.175	-2.22354	0.865537	-2.56898	0.0101999	0.0587184
ENSG00000160948	VPS28	507.408	1.36739	0.573109	2.38592	0.0170366	0.0834561		ENSG00000136856	SLC2A8	219.821	-1.864	0.724371	-2.57327	0.0100743	0.0583086
ENSG00000167701	GPT	302.945	-3.63225	0.714722	-5.08204	3.73408e-07	1.77792e-05		ENSG00000197958	RPL12	2352.61	1.44514	0.593254	2.43595	0.0148527	0.0770221
ENSG00000213563	C8orf82	112.42	-3.60584	1.03798	-3.4739	0.000512945	0.00598532		ENSG00000136877	FPGS	391.607	-2.15826	0.685063	-3.15045	0.00163021	0.0147679
ENSG00000161016	RPL8	8318.02	2.97912	0.662334	4.49791	6.86236e-06	0.000184671		ENSG00000106991	ENG	101.79	-9.71658	1.73039	-5.61525	1.96277e-08	1.2515e-06
ENSG00000182307	C8orf33	274.021	2.05472	0.848832	2.42064	0.0154931	0.0776553		ENSG00000136908	DPM2	521.277	1.96706	0.756852	2.599	0.00934949	0.0552542
ENSG00000107104	KANK1	345.827	-1.85104	0.782832	-2.36455	0.0180521	0.087071		ENSG00000167106	FAM102A	97.52	-2.84829	0.878281	-3.24303	0.00118267	0.0114878
ENSG00000080503	SMARCA2	149.735	-5.38609	0.787797	-6.8369	8.09232e-12	1.74216e-09		ENSG00000148339	SLC25A25	224.689	-3.82249	0.804479	-4.75151	2.019e-06	6.43426e-05
ENSG00000106688	SLC1A1	104.022	-6.43299	1.07104	-6.00629	1.89816e-09	2.07012e-07		ENSG00000197694	SPTAN1	309.642	-1.78127	0.682614	-2.60948	0.00906788	0.0539888
ENSG00000106686	SPATA6L	53.4908	-2.09738	0.811824	-2.58354	0.00977916	0.0555168		ENSG00000167136	ENDOG	126.977	-2.19658	0.822977	-2.66907	0.00760614	0.0472739
ENSG00000106993	CDC37L1	154.233	-2.26777	0.652849	-3.47365	0.000513429	0.00598532		ENSG00000187239	FNBP1	133.749	-2.60081	0.811323	-3.20564	0.00134763	0.0126671
ENSG00000096968	JAK2	44.7092	-4.49709	1.36358	-3.29801	0.000973726	0.00980052		ENSG00000126883	NUP214	136.302	-1.98871	0.791232	-2.51343	0.0119562	0.065889
ENSG00000197646	PDCD1LG2	15.3485	-7.40151	3.06218	-2.41707	0.015646	0.078094		ENSG00000130723	PRRC2B	316.651	-2.32343	0.681124	-3.41117	0.000646849	0.00709287
ENSG00000183354	KIAA2026	118.834	-3.04916	0.840247	-3.62889	0.00028464	0.00373889		ENSG00000107263	RAPGEF1	88.8735	-2.21066	0.897811	-2.46227	0.0138059	0.0731085
ENSG00000137033	IL33	327.196	-3.1266	1.33431	-2.34324	0.019117	0.0908292		ENSG00000107290	SETX	192.737	-2.94733	0.863747	-3.41226	0.000644257	0.007074
ENSG00000147854	UHRF2	119.48	-2.89538	0.748799	-3.8667	0.000110319	0.00172688		ENSG00000148303	RPL7A	5632.95	2.22949	0.603169	3.6963	0.000218767	0.00303124
ENSG00000153707	PTPRD	36.3639	-3.61929	1.16095	-3.11753	0.00182376	0.0158202		ENSG00000148248	SURF4	3022.15	1.83205	0.598761	3.05974	0.00221528	0.0186075
ENSG00000153714	LURAP1L	45.4041	-2.62688	0.908811	-2.89045	0.00384687	0.0277259		ENSG00000123454	DBH	54.4245	-7.75098	1.78131	-4.35127	1.35351e-05	0.000304979
ENSG00000107186	MPDZ	163.524	-4.19756	0.732702	-5.72888	1.01098e-08	8.25566e-07		ENSG00000160293	VAV2	150.975	-2.19402	0.807108	-2.71837	0.00656047	0.0420828
ENSG00000147862	NFIB	195.238	-3.94811	0.750291	-5.2621	1.42416e-07	8.00279e-06		ENSG00000186350	RXRA	331.174	-4.20571	0.757534	-5.55185	2.82663e-08	1.70643e-06
ENSG00000175893	ZDHHC21	57.7162	-3.10413	0.929851	-3.33831	0.00084289	0.00878224		ENSG00000160339	FCN2	48.7519	-7.62978	1.86386	-4.09353	4.24862e-05	0.000796828
ENSG00000044459	CNTLN	226.946	-3.77814	0.727369	-5.19425	2.05548e-07	1.0715e-05		ENSG00000122140	MRPS2	701.408	1.73934	0.700911	2.48154	0.0130817	0.0703517
ENSG00000155876	RRAGA	666.063	2.40398	0.953716	2.52064	0.0117142	0.0630678		ENSG00000122133	PAEP	647.111	2.96116	1.06452	2.7817	0.00540756	0.0363031
ENSG00000147883	CDKN2B	7.04247	6.54696	2.58056	2.53703	0.0111798	0.0609833		ENSG00000148411	NACC2	76.8176	-2.50577	1.01865	-2.45989	0.0138979	0.0734278
ENSG00000120156	TEK	18.9388	-7.70133	2.10257	-3.66281	0.000249461	0.00334673		ENSG00000148396	SEC16A	195.098	-2.05039	0.838402	-2.44559	0.0144616	0.075582
ENSG00000107201	DDX58	80.8059	-4.01378	0.906075	-4.42985	9.42996e-06	0.000240493		ENSG00000148400	NOTCH1	75.9994	-4.33106	1.34944	-3.20953	0.00132953	0.0125486
ENSG00000147955	SIGMAR1	4463.12	2.95132	0.680372	4.3378	1.43916e-05	0.000337918		ENSG00000169692	AGPAT2	1128.65	-2.18257	0.860186	-2.53732	0.0111704	0.0624483
ENSG00000172724	CCL19	16.4076	-7.49539	2.53522	-2.9565	0.00311149	0.023606		ENSG00000165716	FAM69B	90.2602	-5.37319	1.1131	-4.82725	1.38433e-06	4.64289e-05
ENSG00000137077	CCL21	67.7489	-9.54374	2.08579	-4.5756	4.74847e-06	0.000136359		ENSG00000213213	CCDC183	54.8624	2.66722	1.14924	2.32085	0.0202952	0.0965918
ENSG00000165283	STOML2	1142.42	2.74109	0.593424	4.61911	3.85395e-06	0.000116158		ENSG00000054148	PHPT1	1919.92	1.6176	0.641253	2.52257	0.0116501	0.0645801
ENSG00000005238	FAM214B	33.6004	-2.26367	0.97902	-2.31218	0.0207678	0.0961294		ENSG00000176919	C8G	3045.84	-2.38751	0.923069	-2.58649	0.00969583	0.056673
ENSG00000159884	CCDC107	129.676	2.35217	0.87015	2.70318	0.00686798	0.0428493		ENSG00000184925	LCN12	49.3037	-5.03892	1.21944	-4.13216	3.59372e-05	0.000691846
ENSG00000137135	ARHGEF39	247.945	2.85022	0.773546	3.68462	0.000229044	0.00313014		ENSG00000107317	PTGDS	51.4183	-6.37573	1.72414	-3.69792	0.000217372	0.00301867
ENSG00000107159	CA9	256.731	6.54909	1.26693	5.16927	2.35012e-07	1.19871e-05		ENSG00000054179	ENTPD2	146.817	6.59705	1.18249	5.57893	2.42e-08	1.50059e-06
ENSG00000137076	TLN1	333.536	-2.53021	0.642	-3.94114	8.10946e-05	0.00134337		ENSG00000212864	RNF208	33.4686	-4.86601	1.40317	-3.46786	0.000524623	0.00601643
ENSG00000137075	RNF38	76.5392	-2.32626	0.965949	-2.40827	0.0160285	0.0793858		ENSG00000188229	TUBB4B	9236.01	5.00885	0.58437	8.57136	1.02274e-17	4.19531e-15
ENSG00000256966	AL513165.2	390.042	2.28935	0.86155	2.65724	0.00787831	0.0473007		ENSG00000188163	FAM166A	1075.99	3.66489	0.626389	5.85082	4.89157e-09	3.83605e-07
ENSG00000175768	TOMM5	794.748	2.2953	0.829243	2.76794	0.00564118	0.0370205		ENSG00000130653	PNPLA7	26.9089	-5.00018	1.65128	-3.02807	0.00246119	0.0203018
ENSG00000255872	AL138752.2	748.84	2.1646	0.793066	2.72941	0.0063448	0.0404374		ENSG00000177963	RIC8A	419.571	1.67836	0.664466	2.52587	0.0115412	0.0641321
ENSG00000107371	EXOSC3	140.144	2.07344	0.726159	2.85535	0.0042989	0.0302641		ENSG00000142102	PGGHG	165.516	-2.81694	1.11262	-2.53182	0.0113474	0.0632307
ENSG00000107338	SHB	61.2857	-2.9015	0.912256	-3.18058	0.00146981	0.0134465		ENSG00000185187	SIGIRR	359.322	-2.64927	1.10292	-2.40205	0.0163035	0.0822266
ENSG00000154330	PGM5	32.635	-5.92808	1.53685	-3.85729	0.000114653	0.00177793		ENSG00000023191	RNH1	1157.05	1.63178	0.639492	2.55168	0.0107205	0.0606672
ENSG00000119139	TJP2	140.555	-2.24499	0.84	-2.6726	0.00752653	0.0459104		ENSG00000185507	IRF7	108.896	-2.27129	0.892581	-2.54463	0.0109394	0.0615145
ENSG00000188647	PTAR1	117.103	-2.84753	0.862653	-3.3009	0.000963752	0.00973149		ENSG00000099834	CDHR5	873.609	-3.33553	0.621703	-5.36516	8.08771e-08	4.3129e-06
ENSG00000198887	SMC5	152.814	-1.8139	0.706489	-2.56749	0.0102438	0.0573399		ENSG00000177156	TALDO1	1757.23	2.02573	0.616689	3.28485	0.00102037	0.010228
ENSG00000119138	KLF9	108.99	-5.03299	0.846578	-5.9451	2.76288e-09	2.86251e-07		ENSG00000177600	RPLP2	4787.17	1.56534	0.58824	2.66105	0.00778966	0.0482411
ENSG00000106733	NMRK1	155.705	-2.014	0.828969	-2.42952	0.0151187	0.0763163		ENSG00000184545	DUSP8	33.0247	-5.75447	1.65193	-3.48349	0.000494925	0.00575422
ENSG00000156049	GNA14	31.9428	-6.85445	1.81215	-3.78249	0.000155266	0.00226971		ENSG00000250644	AC068580.4	13517.5	2.39325	0.719431	3.32659	0.000879145	0.00907976
ENSG00000156052	GNAQ	159.708	-2.67993	0.812931	-3.29663	0.000978536	0.00983699		ENSG00000117984	CTSD	30147.4	1.60249	0.683842	2.34337	0.0191106	0.0925335
ENSG00000135069	PSAT1	2472.12	2.76001	0.881121	3.13239	0.00173389	0.0152643		ENSG00000130592	LSP1	44.877	-2.91737	1.11347	-2.62007	0.0087912	0.0527232
ENSG00000165115	KIF27	53.7166	-3.70735	0.983193	-3.77072	0.000162777	0.00236905		ENSG00000167244	IGF2	18107.7	-7.53632	1.15946	-6.49985	8.04019e-11	9.37506e-09
ENSG00000083223	ZCCHC6	197.87	-4.45084	1.03	-4.3212	1.55184e-05	0.000359789		ENSG00000129965	INS-IGF2	4794.41	-7.10957	1.39107	-5.11085	3.20709e-07	1.35733e-05
ENSG00000196730	DAPK1	265.032	-2.69537	1.09312	-2.46575	0.0136725	0.0707506		ENSG00000254827	SLC22A18AS	74.6334	2.5606	1.02145	2.50684	0.0121817	0.06682
ENSG00000123975	CKS2	606.967	4.53897	1.23607	3.67211	0.000240556	0.00324731		ENSG00000110628	SLC22A18	1040.04	2.1538	0.675126	3.19022	0.00142163	0.0132537
ENSG00000130222	GADD45G	323.512	-5.36613	0.932169	-5.7566	8.58234e-09	7.30889e-07		ENSG00000181649	PHLDA2	469.503	6.07987	1.0003	6.07804	1.21657e-09	1.15164e-07
ENSG00000148090	AUH	114.89	-2.99014	0.744323	-4.01726	5.88794e-05	0.00105977		ENSG00000132109	TRIM21	150.924	-2.00194	0.834888	-2.39786	0.0164911	0.0829116
ENSG00000106819	ASPN	50.1251	-7.57427	1.66979	-4.53607	5.73131e-06	0.000158434		ENSG00000132274	TRIM22	129.957	-2.29215	0.907674	-2.5253	0.0115601	0.0642147
ENSG00000106823	ECM2	86.1699	-4.36822	0.795554	-5.49079	4.00151e-08	2.67472e-06		ENSG00000166311	SMPD1	222.223	-3.33372	0.891287	-3.74034	0.000183772	0.00261564
ENSG00000131669	NINJ1	711.805	2.03075	0.558152	3.63835	0.00027439	0.00363304		ENSG00000110169	HPX	17694.2	-5.67266	0.834971	-6.79384	1.09188e-11	1.64791e-09
ENSG00000048828	FAM120A	344.171	-2.96935	0.695442	-4.26973	1.95709e-05	0.000436643		ENSG00000132254	ARFIP2	375.83	1.89847	0.670094	2.83314	0.00460928	0.0322569
ENSG00000197724	PHF2	25.6194	-2.65977	1.06159	-2.50545	0.0122295	0.0651653		ENSG00000179532	DNHD1	222.487	-3.91362	0.757814	-5.16435	2.41275e-07	1.09657e-05
ENSG00000130950	NUTM2F	9.41297	-6.71005	2.73492	-2.45348	0.0141483	0.0725671		ENSG00000166340	TPP1	1858.68	1.72677	0.677705	2.54796	0.0108355	0.0611235
ENSG00000182150	ERCC6L2	58.8364	-2.60489	0.992935	-2.62343	0.00870506	0.0508828		ENSG00000166387	PPFIBP2	145.142	-2.28819	0.788223	-2.90297	0.00369644	0.0273903
ENSG00000188152	NUTM2G	8.32653	-6.53119	2.71467	-2.40589	0.0161333	0.0797856		ENSG00000166444	ST5	131.558	-2.63723	0.845496	-3.11915	0.00181372	0.0159955
ENSG00000136943	CTSV	22.2931	4.05873	1.23712	3.2808	0.00103512	0.0102812		ENSG00000166452	AKIP1	162.092	2.21427	0.943066	2.34795	0.018877	0.09168
ENSG00000136842	TMOD1	77.2514	-2.96389	0.780518	-3.79734	0.000146259	0.00216283		ENSG00000184014	DENND5A	201.412	-3.79768	0.794993	-4.777	1.77931e-06	5.75057e-05
ENSG00000136925	TSTD2	68.2837	-2.12745	0.830617	-2.56129	0.0104285	0.0580456		ENSG00000110321	EIF4G2	3198.63	1.78828	0.694802	2.57379	0.0100591	0.0582428
ENSG00000136897	MRPL50	330.545	1.7776	0.76457	2.32496	0.0200741	0.0938555		ENSG00000110328	GALNT18	33.2992	-5.50715	1.56241	-3.52477	0.000423843	0.00509823
ENSG00000136870	ZNF189	67.1531	-2.4187	0.959838	-2.51991	0.0117385	0.0631578		ENSG00000187079	TEAD1	79.9032	-2.40457	1.01874	-2.36033	0.0182585	0.089616
ENSG00000165029	ABCA1	242.561	-2.9341	0.670585	-4.37543	1.21194e-05	0.000292435		ENSG00000133794	ARNTL	77.2505	-2.16767	0.937597	-2.31194	0.020781	0.0978958
ENSG00000148143	ZNF462	27.2074	-4.71042	1.20967	-3.89396	9.86212e-05	0.00157651		ENSG00000256206	AC018523.2	1002.25	2.52497	0.620806	4.06725	4.7572e-05	0.000876794
ENSG00000119318	RAD23B	172.45	-2.49646	0.725461	-3.4412	0.000579137	0.00658348		ENSG00000129084	PSMA1	1406.49	2.19334	0.61089	3.5904	0.000330171	0.00420213
ENSG00000095203	EPB41L4B	139.198	-3.10552	0.750267	-4.13922	3.4849e-05	0.000693508		ENSG00000110700	RPS13	3378.25	1.87531	0.589273	3.18242	0.00146051	0.0135608
ENSG00000070159	PTPN3	430.374	-3.3403	0.624248	-5.35092	8.75102e-08	5.21819e-06		ENSG00000070081	NUCB2	425.977	1.63194	0.653874	2.49581	0.012567	0.068221
ENSG00000243444	PALM2	73.8797	-3.32404	0.868116	-3.82902	0.000128652	0.00194942		ENSG00000006611	USH1C	75.6768	4.56831	1.11629	4.0924	4.26929e-05	0.000797898
ENSG00000157654	PALM2-AKAP2	269.474	-4.26387	0.845521	-5.04289	4.58563e-07	2.08263e-05		ENSG00000166788	SAAL1	72.948	2.86874	0.979779	2.92795	0.00341209	0.0258337
ENSG00000241978	AKAP2	238.116	-4.21283	0.954007	-4.41594	1.00574e-05	0.000252225		ENSG00000148965	SAA4	2854.02	-7.6684	1.30415	-5.88002	4.10222e-09	3.31451e-07
ENSG00000165124	SVEP1	48.3154	-4.66161	1.17972	-3.95145	7.76803e-05	0.00129585		ENSG00000255071	SAA2-SAA4	3311.01	-7.57293	1.31536	-5.75731	8.54645e-09	6.1867e-07
ENSG00000059769	DNAJC25	117.959	-3.03646	0.84935	-3.57504	0.00035018	0.00446533		ENSG00000134339	SAA2	1336.94	-5.79105	1.26271	-4.5862	4.51397e-06	0.00012219
ENSG00000165181	C9orf84	15.2546	-7.40644	2.23069	-3.32025	0.000899361	0.00920859		ENSG00000173432	SAA1	1749.75	-7.28393	1.33916	-5.43917	5.35284e-08	3.01492e-06
ENSG00000148154	UGCG	83.2014	-2.65305	0.902599	-2.93935	0.00328906	0.0247045		ENSG00000134333	LDHA	19283.8	3.03237	0.606561	4.99928	5.75441e-07	2.23988e-05
ENSG00000119314	PTBP3	60.4356	-2.33412	0.770726	-3.02847	0.00245794	0.0198177		ENSG00000074319	TSG101	555.841	1.67262	0.652775	2.56232	0.0103976	0.0594226
ENSG00000119321	FKBP15	101.414	-2.78771	0.942594	-2.95749	0.0031016	0.0235417		ENSG00000151117	TMEM86A	15.0016	-5.78106	2.25796	-2.5603	0.0104582	0.0596984
ENSG00000148218	ALAD	369.604	-3.12222	0.668058	-4.67358	2.95998e-06	9.34622e-05		ENSG00000166833	NAV2	184.174	-2.75797	0.784855	-3.51399	0.000441436	0.00526123
ENSG00000229314	ORM1	54865.7	-5.35295	0.960526	-5.57293	2.50489e-08	1.80537e-06		ENSG00000109854	HTATIP2	814.524	2.7346	0.661958	4.13108	3.61056e-05	0.000694251
ENSG00000228278	ORM2	24069.1	-4.08569	0.926561	-4.40952	1.03599e-05	0.000258639		ENSG00000183161	FANCF	92.9844	2.86815	0.884603	3.2423	0.0011857	0.0115102
ENSG00000041982	TNC	16.6954	-5.85479	1.92621	-3.03955	0.00236933	0.0192437		ENSG00000148935	GAS2	84.5428	-2.48417	0.925221	-2.68495	0.00725402	0.0454919
ENSG00000148219	ASTN2	206.629	-3.01607	1.07812	-2.79752	0.00514958	0.0347859		ENSG00000066382	MPPED2	53.3261	3.06725	1.07618	2.85012	0.00437031	0.0310877
ENSG00000136869	TLR4	68.7751	-6.07393	1.30368	-4.65906	3.17658e-06	9.87958e-05		ENSG00000060749	QSER1	88.9353	-2.86775	0.908325	-3.15718	0.00159303	0.0145215
ENSG00000106780	MEGF9	223.269	-2.71741	0.699908	-3.88253	0.000103375	0.00164142		ENSG00000110422	HIPK3	118.614	-3.02046	0.830699	-3.63604	0.000276858	0.00366047
ENSG00000056558	TRAF1	32.8077	3.32763	1.34957	2.4657	0.0136747	0.0707506		ENSG00000110436	SLC1A2	179.568	-3.33859	0.783264	-4.2624	2.02244e-05	0.000425723
ENSG00000106804	C5	1364.37	-2.67401	0.892256	-2.99691	0.00272729	0.0214712		ENSG00000187479	C11orf96	13.0862	-7.16519	2.51254	-2.85177	0.00434766	0.0309679
ENSG00000119397	CNTRL	27.3182	-3.33405	1.041	-3.20274	0.00136124	0.0126629		ENSG00000019485	PRDM11	22.7703	-4.12674	1.69206	-2.43888	0.0147327	0.0765986
ENSG00000119396	RAB14	407.665	-1.69116	0.676361	-2.50038	0.012406	0.0658092		ENSG00000121671	CRY2	151.557	-2.56681	0.797639	-3.21801	0.00129081	0.0122846
ENSG00000119421	NDUFA8	257.424	1.73181	0.715491	2.42046	0.0155011	0.0776553		ENSG00000135365	PHF21A	53.8779	-2.61489	1.03774	-2.5198	0.0117422	0.0649783
ENSG00000056586	RC3H2	64.6117	-2.06926	0.805458	-2.56905	0.0101977	0.0571494		ENSG00000157613	CREB3L1	50.7791	4.1465	1.4497	2.86025	0.00423302	0.0303269
ENSG00000136942	RPL35	2695.33	1.92696	0.748052	2.57597	0.0099959	0.0564159		ENSG00000066336	SPI1	12.5097	-5.73571	2.29652	-2.49757	0.0125049	0.068034
ENSG00000095370	SH2D3C	20.3802	-7.81167	1.88097	-4.153	3.28141e-05	0.000660947		ENSG00000149187	CELF1	265.717	-2.4152	0.703079	-3.43517	0.00059218	0.0066004
ENSG00000136877	FPGS	411.885	-2.41841	0.591699	-4.08723	4.36557e-05	0.000828718		ENSG00000109920	FNBP4	159.366	-2.41999	0.776552	-3.11632	0.00183123	0.0161056
ENSG00000106991	ENG	296.561	-11.6746	1.75922	-6.63625	3.21771e-11	5.92666e-09		ENSG00000149177	PTPRJ	203.62	-4.40369	0.770753	-5.71349	1.10685e-08	7.69883e-07
ENSG00000136908	DPM2	344.681	2.39788	0.695316	3.44862	0.000563466	0.00644992		ENSG00000134817	APLNR	70.7202	-8.57987	1.74758	-4.90957	9.12782e-07	3.29632e-05
ENSG00000167106	FAM102A	100.462	-3.03234	0.794662	-3.81588	0.000135697	0.00203385		ENSG00000149131	SERPING1	9791.36	-4.15847	1.04602	-3.97553	7.02238e-05	0.00120541
ENSG00000148334	PTGES2	264.897	2.74134	1.00655	2.7235	0.00645946	0.0409718		ENSG00000213593	TMX2	793.397	2.29524	0.623549	3.68093	0.000232388	0.00318846
ENSG00000171159	C9orf16	159.422	2.67902	0.693894	3.86086	0.000112991	0.00176204		ENSG00000254462	TMX2-CTNND1	74.9041	3.60707	0.982007	3.67316	0.000239566	0.00325623
ENSG00000187239	FNBP1	105.999	-2.39358	0.677305	-3.53398	0.00040935	0.00503397		ENSG00000198561	CTNND1	783.923	-2.16462	0.623772	-3.47021	0.000520045	0.0059725
ENSG00000126883	NUP214	107.126	-1.74408	0.751244	-2.32159	0.0202553	0.0944241		ENSG00000186660	ZFP91	167.718	-2.57586	0.761675	-3.38183	0.000720047	0.00770605
ENSG00000130723	PRRC2B	189.299	-1.59005	0.620458	-2.5627	0.0103862	0.0579248		ENSG00000255073	ZFP91-CNTF	46.0454	-3.121	1.14327	-2.72989	0.00633552	0.0409187
ENSG00000107290	SETX	201.51	-2.84756	0.80777	-3.52521	0.000423146	0.00515772		ENSG00000149124	GLYAT	483.084	-5.84093	1.02141	-5.71847	1.07486e-08	7.54196e-07
ENSG00000148303	RPL7A	4094.38	2.17269	0.809864	2.68278	0.0073013	0.0448772		ENSG00000166840	GLYATL1	359.411	-2.78368	0.772092	-3.60537	0.000311709	0.0040248
ENSG00000196990	FAM163B	8.24245	-6.49831	2.75736	-2.35671	0.0184375	0.0882838		ENSG00000110042	DTX4	131.749	-2.78713	0.807308	-3.45238	0.000555666	0.00628236
ENSG00000123454	DBH	38.9544	-7.21901	1.6428	-4.39434	1.11111e-05	0.000273823		ENSG00000197629	MPEG1	45.4861	-8.47649	1.90507	-4.44943	8.60994e-06	0.000209016
ENSG00000160293	VAV2	111.745	-1.81018	0.686652	-2.63624	0.00838293	0.0494533		ENSG00000110048	OSBP	134.299	-3.81244	0.833346	-4.57486	4.76545e-06	0.000127275
ENSG00000186350	RXRA	323.709	-4.2763	0.732249	-5.83996	5.22141e-09	4.80863e-07		ENSG00000134827	TCN1	1376.64	10.5582	1.27505	8.28061	1.22545e-16	4.45561e-14
ENSG00000160339	FCN2	270.653	-11.5429	1.70063	-6.78746	1.14127e-11	2.39479e-09		ENSG00000110077	MS4A6A	107.328	-8.76174	1.45465	-6.02327	1.70928e-09	1.58064e-07
ENSG00000085265	FCN1	41.4672	-2.58132	0.875491	-2.94842	0.00319401	0.0240997		ENSG00000110079	MS4A4A	22.7729	-6.27432	2.04422	-3.06929	0.00214565	0.0182683
ENSG00000130558	OLFM1	17.1749	-6.25032	1.76404	-3.54319	0.000395314	0.00491976		ENSG00000166927	MS4A7	111.489	-3.40357	0.859525	-3.95982	7.50049e-05	0.00126441
ENSG00000122140	MRPS2	488.425	1.9401	0.611414	3.17314	0.00150802	0.0136678		ENSG00000110446	SLC15A3	43.0906	-5.54463	1.40507	-3.94616	7.94133e-05	0.00132615
ENSG00000122133	PAEP	421.528	6.39321	1.55507	4.11121	3.93591e-05	0.000763999		ENSG00000011347	SYT7	491.979	-5.72325	0.760743	-7.52324	5.34348e-14	1.27589e-11
ENSG00000148400	NOTCH1	105.475	-3.29926	1.23639	-2.66846	0.00762009	0.0463011		ENSG00000134825	TMEM258	1035.46	1.5514	0.638509	2.42973	0.01511	0.0780278
ENSG00000213213	CCDC183	32.8332	3.24162	1.29535	2.50251	0.0123318	0.0655204		ENSG00000167995	BEST1	72988.2	2.92802	0.675333	4.33566	1.4532e-05	0.000324697
ENSG00000054148	PHPT1	1075.41	4.02979	0.802599	5.02093	5.14227e-07	2.29767e-05		ENSG00000167996	FTH1	83602	2.99062	0.67182	4.45152	8.52648e-06	0.000207652
ENSG00000177943	MAMDC4	196.344	2.58459	0.836007	3.09158	0.00199092	0.0168989		ENSG00000124942	AHNAK	1490.99	-4.63805	0.636576	-7.28594	3.19439e-13	6.08379e-11
ENSG00000054179	ENTPD2	94.4147	10.2764	1.58414	6.48707	8.75208e-11	1.35592e-08		ENSG00000254772	EEF1G	6186.66	1.49774	0.593847	2.5221	0.0116656	0.0646434
ENSG00000176058	TPRN	82.6683	-1.83316	0.793571	-2.31001	0.0208876	0.0964496		ENSG00000255508	AP002990.1	6234.05	1.47775	0.592508	2.49407	0.0126289	0.0684874
ENSG00000188229	TUBB4B	6186.54	4.68856	0.934216	5.01871	5.20197e-07	2.31016e-05		ENSG00000168000	BSCL2	808.886	2.56295	0.647418	3.95873	7.53498e-05	0.00126889
ENSG00000188163	FAM166A	746.172	3.29709	0.858049	3.84254	0.000121765	0.00186553		ENSG00000214753	HNRNPUL2	274.002	-3.81624	0.786254	-4.85369	1.21183e-06	4.1425e-05
ENSG00000130653	PNPLA7	98.7878	-6.85498	1.45767	-4.70269	2.5676e-06	8.32938e-05		ENSG00000168002	POLR2G	884.495	1.67965	0.714041	2.35232	0.0186568	0.0909481
ENSG00000182154	MRPL41	604.307	1.73894	0.74048	2.3484	0.0188542	0.0899157		ENSG00000168003	SLC3A2	1561.76	3.62872	0.665724	5.45078	5.01488e-08	2.85509e-06
ENSG00000177963	RIC8A	278.733	2.10275	0.87582	2.40089	0.0163551	0.0806422		ENSG00000197658	SLC22A24	15.7684	-6.18468	2.42088	-2.55472	0.0106273	0.0602678
ENSG00000185507	IRF7	158.282	-2.93521	0.744826	-3.94081	8.12083e-05	0.0013435		ENSG00000184999	SLC22A10	48.7332	-6.53489	1.54719	-4.22372	2.40301e-05	0.000492864
ENSG00000099834	CDHR5	350.681	-1.9674	0.698937	-2.81485	0.00488008	0.0332921		ENSG00000196600	SLC22A25	262.167	-6.73327	0.876681	-7.68041	1.58578e-14	4.29987e-12
ENSG00000177156	TALDO1	1223.98	2.19218	0.703775	3.11488	0.00184017	0.015896		ENSG00000149742	SLC22A9	116.995	-2.37913	0.833195	-2.85543	0.0042978	0.0306674
ENSG00000177700	POLR2L	1059.53	2.13121	0.800276	2.66309	0.00774261	0.0467667		ENSG00000133321	RARRES3	199.049	-4.14165	0.762708	-5.43019	5.6295e-08	3.13801e-06
ENSG00000177830	CHID1	624.19	2.59609	0.756165	3.43323	0.000596435	0.00674427		ENSG00000133318	RTN3	928.321	1.85852	0.68681	2.70601	0.00680969	0.0432784
ENSG00000250644	AC068580.4	8561.38	4.04478	1.03848	3.89489	9.82432e-05	0.00157199		ENSG00000110583	NAA40	89.0825	2.55278	1.02278	2.49593	0.0125628	0.068221
ENSG00000117984	CTSD	18626.4	3.20868	0.907842	3.5344	0.000408699	0.00502969		ENSG00000133315	MACROD1	110.208	-4.05437	1.09634	-3.6981	0.000217218	0.00301867
ENSG00000181649	PHLDA2	307.236	5.36972	1.03003	5.21315	1.85663e-07	9.83301e-06		ENSG00000168439	STIP1	757.847	1.97008	0.629872	3.12776	0.00176146	0.0156642
ENSG00000244734	HBB	334.221	-11.8474	3.01701	-3.92687	8.60588e-05	0.00140968		ENSG00000149781	FERMT3	30.6684	-3.42875	1.33726	-2.564	0.0103472	0.0592255
ENSG00000223609	HBD	9.99602	-6.78035	2.75821	-2.45824	0.0139618	0.0718327		ENSG00000173511	VEGFB	46.5741	-3.75399	1.21333	-3.09395	0.00197513	0.0170801
ENSG00000213934	HBG1	8.06046	-6.48812	2.7389	-2.36888	0.0178423	0.086407		ENSG00000173113	TRMT112	2945.41	2.54365	0.598833	4.24768	2.15992e-05	0.000449342
ENSG00000258588	TRIM6-TRIM34	47.5751	-3.35582	0.994853	-3.37318	0.000743041	0.00794108		ENSG00000126432	PRDX5	3772.93	1.57137	0.642995	2.44383	0.0145323	0.075803
ENSG00000258659	TRIM34	52.9485	-2.29119	0.865608	-2.64691	0.00812305	0.0484025		ENSG00000126391	FRMD8	147.641	1.78945	0.775261	2.30819	0.0209887	0.0986418
ENSG00000166311	SMPD1	202.243	-2.90837	0.893496	-3.25505	0.00113374	0.0110194		ENSG00000168056	LTBP3	305.421	-2.35857	0.683919	-3.44861	0.000563486	0.00633942
ENSG00000110169	HPX	12619.6	-5.38874	0.768801	-7.00929	2.39534e-12	5.67252e-10		ENSG00000172757	CFL1	10663.4	3.44773	0.58652	5.87828	4.14547e-09	3.33262e-07
ENSG00000132254	ARFIP2	288.154	1.58713	0.600161	2.6445	0.00818114	0.0485903		ENSG00000172803	SNX32	1662.03	3.80259	0.607406	6.26038	3.84032e-10	3.96371e-08
ENSG00000166337	TAF10	1049.9	1.77422	0.667761	2.65697	0.0078847	0.0473053		ENSG00000175334	BANF1	1532.51	2.1843	0.601248	3.63294	0.000280209	0.00369561
ENSG00000166340	TPP1	1343.21	1.93452	0.749519	2.58101	0.00985118	0.055864		ENSG00000174807	CD248	29.0853	-5.6818	2.02737	-2.80255	0.00507007	0.0345985
ENSG00000166341	DCHS1	39.0346	-5.51319	1.41043	-3.90887	9.2727e-05	0.00150095		ENSG00000174684	B4GAT1	285.266	3.27015	0.732276	4.46573	7.97952e-06	0.000197305
ENSG00000170743	SYT9	10.1248	-6.8089	2.31728	-2.93832	0.00330002	0.0247531		ENSG00000254986	DPP3	175.711	2.008	0.753366	2.66538	0.00769023	0.0476854
ENSG00000166405	RIC3	46.1888	-2.72448	0.883468	-3.08385	0.00204341	0.0172122		ENSG00000173120	KDM2A	258.849	-2.29464	0.702738	-3.26528	0.00109356	0.0107926
ENSG00000184014	DENND5A	118.542	-3.36522	0.723608	-4.65061	3.30948e-06	0.000101783		ENSG00000173020	GRK2	90.3368	-2.11413	0.880764	-2.40034	0.0163799	0.0824822
ENSG00000255823	MTRNR2L8	23017.4	-2.85712	0.813476	-3.51224	0.000444347	0.00534927		ENSG00000172531	PPP1CA	1194.19	1.56163	0.607248	2.57165	0.0101215	0.058368
ENSG00000133800	LYVE1	155.136	-10.7398	1.63138	-6.58326	4.60242e-11	7.94732e-09		ENSG00000175463	TBC1D10C	33.7847	-3.17033	1.28763	-2.46215	0.0138109	0.0731085
ENSG00000110328	GALNT18	42.1179	-5.9693	1.38252	-4.3177	1.5766e-05	0.000364002		ENSG00000213402	PTPRCAP	64.1226	-5.88452	1.26001	-4.6702	3.00909e-06	8.78455e-05
ENSG00000170242	USP47	176.484	-1.73502	0.644083	-2.69378	0.0070647	0.0437686		ENSG00000084207	GSTP1	115.963	-2.4456	0.906173	-2.69882	0.0069585	0.0439313
ENSG00000050165	DKK3	37.1372	4.44212	1.51763	2.92702	0.00342227	0.0254513		ENSG00000110721	CHKA	211.237	-2.04026	0.727082	-2.80609	0.00501467	0.0342841
ENSG00000187079	TEAD1	57.3851	-2.09461	0.857566	-2.44251	0.0145855	0.0741895		ENSG00000110090	CPT1A	351.178	-2.6918	0.701368	-3.83792	0.00012408	0.00190319
ENSG00000133794	ARNTL	82.4483	-2.47034	0.836643	-2.95269	0.00315021	0.0238381		ENSG00000131620	ANO1	106.996	-8.75815	1.45529	-6.01816	1.76405e-09	1.62192e-07
ENSG00000197601	FAR1	10.3008	-5.14942	1.92023	-2.68166	0.00732573	0.0449773		ENSG00000162105	SHANK2	143.354	-2.60756	0.820951	-3.17627	0.00149181	0.0137887
ENSG00000152270	PDE3B	157.451	-1.73918	0.728015	-2.38893	0.0168973	0.0828717		ENSG00000137496	IL18BP	178.991	-3.42053	0.793694	-4.30963	1.63525e-05	0.000356412
ENSG00000006611	USH1C	46.5027	8.26795	1.54742	5.34305	9.13963e-08	5.37241e-06		ENSG00000149357	LAMTOR1	824.074	2.30997	0.620128	3.72499	0.000195322	0.00275796
ENSG00000148965	SAA4	3142.29	-5.37816	1.40612	-3.82483	0.000130863	0.0019757		ENSG00000165457	FOLR2	46.4798	-8.96111	1.89782	-4.72179	2.33774e-06	7.19214e-05
ENSG00000255071	SAA2-SAA4	16249.9	-7.56293	1.49709	-5.05175	4.3779e-07	2.00476e-05		ENSG00000054965	FAM168A	79.6785	-3.16861	1.00163	-3.16346	0.00155903	0.0142685
ENSG00000134339	SAA2	27237.6	-9.9528	1.35892	-7.32406	2.40578e-13	7.25102e-11		ENSG00000021300	PLEKHB1	126.562	2.88088	0.901539	3.19551	0.00139584	0.0130566
ENSG00000173432	SAA1	48858	-10.9548	1.45746	-7.51635	5.63267e-14	1.94527e-11		ENSG00000175567	UCP2	99.5774	-8.63105	1.61668	-5.33874	9.35926e-08	4.79902e-06
ENSG00000110756	HPS5	157.995	-2.70089	0.871738	-3.09828	0.00194648	0.0166152		ENSG00000166439	RNF169	68.6899	-3.15546	0.989373	-3.18935	0.00142591	0.013278
ENSG00000134333	LDHA	14530.5	2.42176	0.837197	2.8927	0.0038194	0.0275879		ENSG00000149273	RPS3	7389.35	2.20677	0.591743	3.72927	0.000192032	0.0027187
ENSG00000148935	GAS2	124.237	-3.14518	0.740556	-4.24705	2.16607e-05	0.000473083		ENSG00000151365	THRSP	706.174	-9.22621	1.21066	-7.62082	2.5207e-14	6.50422e-12
ENSG00000169550	MUC15	19.6902	8.01485	1.76696	4.53595	5.73446e-06	0.000158434		ENSG00000118369	USP35	28.7022	-3.25698	1.38825	-2.34611	0.0189705	0.0920502
ENSG00000129151	BBOX1	84.5279	-2.46045	0.93299	-2.63717	0.00836013	0.0493715		ENSG00000033327	GAB2	67.2106	-3.17717	1.03124	-3.08093	0.00206356	0.0177202
ENSG00000135378	PRRG4	113.12	-2.16042	0.725377	-2.97834	0.00289816	0.0224422		ENSG00000150687	PRSS23	472.852	2.49821	0.721383	3.46309	0.000534012	0.00609429
ENSG00000060749	QSER1	47.4537	-1.94731	0.80065	-2.43216	0.0150091	0.0758553		ENSG00000109861	CTSC	2756.86	5.65499	0.604901	9.34861	8.88068e-21	4.89908e-18
ENSG00000121690	DEPDC7	138.638	-2.92445	0.733712	-3.98582	6.72468e-05	0.0011612		ENSG00000166025	AMOTL1	134.865	-3.55941	1.04002	-3.42245	0.000620593	0.00686127
ENSG00000110422	HIPK3	156.437	-3.57869	0.743198	-4.81526	1.47011e-06	5.41554e-05		ENSG00000263465	SRSF8	166.919	2.06821	0.84267	2.45435	0.014114	0.0741443
ENSG00000135363	LMO2	20.6339	-6.26138	1.70631	-3.66954	0.000242989	0.00327482		ENSG00000023445	BIRC3	102.833	-3.96309	0.897308	-4.41664	1.00247e-05	0.000236892
ENSG00000166016	ABTB2	36.2305	-2.8173	0.916534	-3.07386	0.00211305	0.0176041		ENSG00000137692	DCUN1D5	177.54	2.56196	0.794038	3.2265	0.00125316	0.012012
ENSG00000110436	SLC1A2	184.354	-3.54564	0.861035	-4.11788	3.8237e-05	0.000746387		ENSG00000137752	CASP1	29.7866	-4.65746	1.60846	-2.89559	0.00378441	0.0279
ENSG00000149090	PAMR1	10.2241	-6.81082	2.27261	-2.99692	0.00272721	0.0214712		ENSG00000152404	CWF19L2	92.2149	-3.09697	0.927071	-3.3406	0.000835985	0.00871844
ENSG00000187479	C11orf96	35.5749	-8.61255	2.01661	-4.2708	1.94777e-05	0.00043515		ENSG00000149289	ZC3H12C	33.2165	-4.01365	1.45959	-2.74985	0.00596229	0.0389722
ENSG00000110492	MDK	201.373	6.89714	1.06078	6.50196	7.92805e-11	1.25165e-08		ENSG00000170145	SIK2	325.629	-1.78381	0.686454	-2.59859	0.0093607	0.0552642
ENSG00000066336	SPI1	25.5427	-6.83179	1.65893	-4.11818	3.81876e-05	0.000746387		ENSG00000137713	PPP2R1B	435.966	-2.13392	0.696753	-3.06267	0.00219374	0.0185494
ENSG00000149187	CELF1	186.181	-1.96785	0.61764	-3.18609	0.00144212	0.013237		ENSG00000204370	SDHD	603.194	2.57744	0.732559	3.5184	0.000434159	0.00519822
ENSG00000109920	FNBP4	110.074	-2.0499	0.742889	-2.75936	0.00579143	0.0377822		ENSG00000255292	SDHD	137.489	2.74729	0.974856	2.81815	0.00483017	0.0333217
ENSG00000149177	PTPRJ	127.947	-3.73928	0.801831	-4.66343	3.10986e-06	9.72683e-05		ENSG00000109906	ZBTB16	172.779	-3.38341	0.946157	-3.57595	0.00034896	0.00435126
ENSG00000134817	APLNR	260.03	-11.4852	1.70858	-6.72209	1.79131e-11	3.49347e-09		ENSG00000166741	NNMT	4029.81	-5.224	1.44696	-3.61032	0.00030582	0.00396155
ENSG00000149131	SERPING1	8704.13	-2.83044	1.06489	-2.65798	0.00786108	0.047232		ENSG00000109917	ZPR1	3210.95	-1.53528	0.597034	-2.57151	0.0101256	0.058368
ENSG00000213593	TMX2	628.361	1.6541	0.585666	2.82431	0.00473832	0.0325516		ENSG00000110243	APOA5	1621.49	-4.29935	0.624326	-6.8864	5.72233e-12	8.97509e-10
ENSG00000254462	TMX2-CTNND1	63.6147	1.80682	0.770066	2.34631	0.0189603	0.0902916		ENSG00000110245	APOC3	48463.1	-2.32798	0.65453	-3.55671	0.000375523	0.0046248
ENSG00000198561	CTNND1	738.514	-2.19879	0.617985	-3.558	0.000373693	0.0047108		ENSG00000160584	SIK3	125.97	-3.83961	0.847835	-4.52872	5.93429e-06	0.000152877
ENSG00000186660	ZFP91	139.063	-2.42562	0.709248	-3.41999	0.000626231	0.0069906		ENSG00000149577	SIDT2	173.954	-2.04454	0.756542	-2.70248	0.00688246	0.0435889
ENSG00000255073	ZFP91-CNTF	35.2544	-2.81149	0.990475	-2.83853	0.00453216	0.0315009		ENSG00000149591	TAGLN	74.7919	-7.8934	1.63166	-4.83767	1.31373e-06	4.43398e-05
ENSG00000149124	GLYAT	421.03	-6.47916	1.42647	-4.54208	5.57016e-06	0.000155449		ENSG00000186318	BACE1	171.958	-1.80312	0.751029	-2.40087	0.0163563	0.0824036
ENSG00000166840	GLYATL1	394.354	-3.36635	0.737819	-4.56257	5.05315e-06	0.00014319		ENSG00000198851	CD3E	16.2672	-7.36957	2.36105	-3.12131	0.0018005	0.015914
ENSG00000110042	DTX4	95.7958	-2.42004	1.04893	-2.30714	0.0210468	0.0969683		ENSG00000167283	ATP5L	2528.91	1.76152	0.62107	2.83627	0.00456437	0.032083
ENSG00000197629	MPEG1	55.118	-9.24333	1.74071	-5.3101	1.09564e-07	6.32835e-06		ENSG00000118058	KMT2A	291.41	-3.44541	0.698996	-4.92909	8.26137e-07	3.026e-05
ENSG00000110048	OSBP	161.119	-4.15045	0.803254	-5.16705	2.37818e-07	1.2093e-05		ENSG00000172425	TTC36	382.989	-26.1769	4.88767	-5.35571	8.52231e-08	4.48486e-06
ENSG00000166889	PATL1	150.536	-1.74976	0.66141	-2.64551	0.00815689	0.0485168		ENSG00000186174	BCL9L	69.5281	-3.85257	1.00307	-3.84077	0.000122647	0.00188665
ENSG00000134827	TCN1	917.391	7.32948	1.56363	4.68748	2.76585e-06	8.83421e-05		ENSG00000188486	H2AFX	109.038	3.39945	1.02303	3.32294	0.000890754	0.00917597
ENSG00000110077	MS4A6A	276.08	-10.2569	1.44717	-7.08759	1.36469e-12	3.53477e-10		ENSG00000172269	DPAGT1	326.821	1.75598	0.677048	2.59358	0.00949813	0.0558233
ENSG00000110079	MS4A4A	43.8983	-7.60477	1.54439	-4.92412	8.47426e-07	3.47723e-05		ENSG00000154096	THY1	23.0688	-5.04535	1.90888	-2.6431	0.00821514	0.0500479
ENSG00000166927	MS4A7	158.008	-4.0102	0.968544	-4.14044	3.46635e-05	0.000691476		ENSG00000184232	OAF	1210.19	-2.68264	0.655877	-4.09016	4.31074e-05	0.000803767
ENSG00000166928	MS4A14	9.82927	-6.74832	2.32622	-2.90098	0.00372001	0.0270824		ENSG00000196914	ARHGEF12	290.106	-2.30789	0.726391	-3.1772	0.00148706	0.0137594
ENSG00000110107	PRPF19	86.3068	-3.14035	0.732797	-4.28543	1.82383e-05	0.000411902		ENSG00000154114	TBCEL	62.8595	-2.58005	0.986711	-2.6148	0.0089281	0.0533751
ENSG00000110446	SLC15A3	46.8496	-5.86259	1.25452	-4.67316	2.96599e-06	9.34738e-05		ENSG00000137642	SORL1	460.586	-3.05241	0.755148	-4.04213	5.29678e-05	0.000955331
ENSG00000011347	SYT7	46.471	-2.36208	0.843393	-2.80069	0.00509933	0.0345168		ENSG00000109971	HSPA8	14360.1	4.05128	0.583255	6.94598	3.75854e-12	6.07365e-10
ENSG00000134824	FADS2	3724.89	3.36242	0.874624	3.84442	0.000120836	0.00185816		ENSG00000221932	HEPN1	558.192	2.92505	1.14799	2.54798	0.010835	0.0611235
ENSG00000149485	FADS1	1280	2.42255	0.720088	3.36424	0.000767541	0.00814566		ENSG00000134910	STT3A	951.761	1.89369	0.614513	3.08161	0.00205885	0.0176923
ENSG00000167995	BEST1	48901.1	3.20458	0.693899	4.61822	3.87048e-06	0.000116234		ENSG00000110063	DCPS	207.298	-1.91832	0.748458	-2.56303	0.0103764	0.0593498
ENSG00000167996	FTH1	55952	3.26466	0.692159	4.71663	2.39782e-06	7.90966e-05		ENSG00000134909	ARHGAP32	56.5049	-4.26731	1.09898	-3.88296	0.000103193	0.00164923
ENSG00000124942	AHNAK	784.544	-3.90472	0.639556	-6.10536	1.02567e-09	1.18899e-07		ENSG00000151715	TMEM45B	2478.24	2.9228	0.848674	3.44396	0.000573255	0.00643574
ENSG00000204922	UQCC3	142.909	1.82263	0.669066	2.72414	0.00644689	0.0409298		ENSG00000261456	TUBB8	143.125	5.27694	0.889448	5.93282	2.97772e-09	2.50724e-07
ENSG00000168000	BSCL2	565.368	2.54185	0.809245	3.14102	0.00168363	0.0149489		ENSG00000151240	DIP2C	82.1556	-3.23157	1.17524	-2.7497	0.00596496	0.0389722
ENSG00000214753	HNRNPUL2	224.911	-3.65105	0.661069	-5.52295	3.33356e-08	2.32258e-06		ENSG00000107937	GTPBP4	346.294	1.89892	0.671554	2.82765	0.00468907	0.0326044
ENSG00000168002	POLR2G	586.977	2.2476	0.754522	2.97884	0.00289343	0.0224238		ENSG00000067064	IDI1	4710.67	2.41219	0.591763	4.07628	4.57613e-05	0.000851266
ENSG00000168003	SLC3A2	1182.09	2.5472	0.987532	2.57936	0.00989831	0.05604		ENSG00000067082	KLF6	995.216	-4.96348	0.661404	-7.50446	6.16818e-14	1.45115e-11
ENSG00000184999	SLC22A10	140.279	-8.24554	1.34785	-6.11755	9.50249e-10	1.12516e-07		ENSG00000151632	AKR1C2	9091.67	3.63979	0.590381	6.16515	7.04159e-10	6.82736e-08
ENSG00000196600	SLC22A25	180.897	-6.27463	1.24406	-5.04367	4.56688e-07	2.07981e-05		ENSG00000187134	AKR1C1	11125.4	3.29236	0.586308	5.61541	1.96099e-08	1.2515e-06
ENSG00000149742	SLC22A9	114.292	-2.44695	0.898743	-2.72263	0.00647646	0.0410242		ENSG00000196139	AKR1C3	16078.5	4.55615	0.611832	7.44674	9.56769e-14	2.09638e-11
ENSG00000133321	RARRES3	181.367	-4.07722	0.713966	-5.71066	1.12536e-08	9.01209e-07		ENSG00000178462	TUBAL3	19.9259	7.20655	2.24781	3.20603	0.0013458	0.0126573
ENSG00000256100	AP000721.1	254.557	1.82651	0.696363	2.62293	0.00871761	0.0509203		ENSG00000057608	GDI2	1857.6	1.89155	0.629396	3.00535	0.00265279	0.021337
ENSG00000167770	OTUB1	712.822	2.03183	0.665763	3.05189	0.00227408	0.0186967		ENSG00000134470	IL15RA	52.2684	-3.49392	1.12198	-3.11406	0.00184532	0.0162098
ENSG00000133315	MACROD1	40.3777	-2.41803	1.02997	-2.34767	0.0188913	0.0900513		ENSG00000165629	ATP5C1	2764.88	1.91449	0.685965	2.79095	0.00525541	0.0355201
ENSG00000149781	FERMT3	32.3354	-3.52772	1.0635	-3.31707	0.000909655	0.0093025		ENSG00000048740	CELF2	29.1326	-8.30518	2.05275	-4.04588	5.21269e-05	0.000944291
ENSG00000173511	VEGFB	26.4836	-3.56818	1.12179	-3.18078	0.00146878	0.0134445		ENSG00000148426	PROSER2	123.72	-2.79294	0.81792	-3.41468	0.00063857	0.00702602
ENSG00000173113	TRMT112	2116.39	2.32533	0.608375	3.8222	0.000132264	0.00199141		ENSG00000151461	UPF2	144.882	-2.94541	0.803141	-3.66737	0.000245061	0.00331682
ENSG00000126432	PRDX5	2379.19	2.50075	0.652873	3.83038	0.000127944	0.00194047		ENSG00000165609	NUDT5	909.114	1.68996	0.703108	2.40356	0.0162365	0.082005
ENSG00000149809	TM7SF2	884.196	3.40354	1.14849	2.96349	0.00304174	0.0231936		ENSG00000151465	CDC123	627.844	2.47978	0.638565	3.88336	0.000103024	0.00164819
ENSG00000149806	FAU	2189.53	1.84215	0.735985	2.50297	0.0123156	0.0654764		ENSG00000183049	CAMK1D	147.415	-1.89831	0.776186	-2.44569	0.0144575	0.075582
ENSG00000172757	CFL1	7235.31	3.43832	0.686631	5.00752	5.51353e-07	2.43727e-05		ENSG00000151474	FRMD4A	170.032	-3.23711	0.832439	-3.8887	0.000100781	0.00162366
ENSG00000172803	SNX32	1125.09	3.69399	0.63385	5.82786	5.61442e-09	5.08581e-07		ENSG00000026025	VIM	154.904	-5.77098	0.90722	-6.36116	2.00231e-10	2.12139e-08
ENSG00000172500	FIBP	153.918	2.71716	0.88579	3.0675	0.00215859	0.0179004		ENSG00000260314	MRC1	82.5607	-9.3949	1.7636	-5.32713	9.97786e-08	5.01422e-06
ENSG00000175592	FOSL1	9.78277	-3.76697	1.63856	-2.29895	0.0215079	0.0985181		ENSG00000165997	ARL5B	276.655	-2.67013	0.72402	-3.68793	0.00022609	0.00311943
ENSG00000175334	BANF1	1050.59	2.36867	0.575762	4.11397	3.88917e-05	0.0007567		ENSG00000269897	COMMD3-BMI1	498.477	2.16797	0.692889	3.12889	0.0017547	0.0156214
ENSG00000174684	B4GAT1	215.491	2.3508	0.946791	2.48291	0.0130312	0.0682092		ENSG00000120549	KIAA1217	157.693	-3.66181	0.949721	-3.85567	0.000115413	0.00180134
ENSG00000174080	CTSF	541.43	2.27463	0.724545	3.1394	0.00169295	0.0150075		ENSG00000107863	ARHGAP21	168.665	-2.09326	0.758347	-2.7603	0.00577491	0.0380037
ENSG00000173599	PC	679.631	-2.4742	0.688297	-3.59466	0.000324809	0.00419997		ENSG00000107890	ANKRD26	126.074	-2.66398	0.814047	-3.27251	0.00106597	0.0106156
ENSG00000173621	LRFN4	16.4362	-7.51405	2.34341	-3.20646	0.00134377	0.0125426		ENSG00000095739	BAMBI	561.042	3.74641	0.64779	5.78337	7.32184e-09	5.47359e-07
ENSG00000173120	KDM2A	169.952	-1.70231	0.710335	-2.39649	0.0165531	0.0814485		ENSG00000197321	SVIL	146.149	-3.78208	0.811521	-4.66048	3.15477e-06	9.12657e-05
ENSG00000172531	PPP1CA	790.403	2.04014	0.67133	3.03895	0.00237401	0.0192722		ENSG00000148516	ZEB1	70.815	-2.34132	0.950965	-2.46205	0.0138147	0.0731085
ENSG00000084207	GSTP1	186.846	-3.44135	0.765058	-4.49815	6.85458e-06	0.000184671		ENSG00000120616	EPC1	147.373	-2.78455	0.784936	-3.54748	0.000388933	0.00476793
ENSG00000110721	CHKA	160.492	-1.79161	0.703686	-2.54604	0.0108954	0.0598556		ENSG00000148498	PARD3	218.202	-2.01543	0.817758	-2.46458	0.0137175	0.0728593
ENSG00000110066	KMT5B	116.001	-2.1585	0.676869	-3.18895	0.00142789	0.0131428		ENSG00000108100	CCNY	207.915	-2.05212	0.72574	-2.82762	0.0046895	0.0326044
ENSG00000171067	C11orf24	519.308	1.91194	0.70672	2.70538	0.00682267	0.042679		ENSG00000075407	ZNF37A	159.5	-2.3701	0.774573	-3.05988	0.00221427	0.0186075
ENSG00000110090	CPT1A	220.035	-2.00055	0.648473	-3.08502	0.00203537	0.017178		ENSG00000169813	HNRNPF	839.683	1.64364	0.647709	2.53762	0.011161	0.0624483
ENSG00000131620	ANO1	74.9578	-8.38665	1.68115	-4.98865	6.0804e-07	2.65949e-05		ENSG00000196793	ZNF239	14.9558	7.33759	2.42552	3.02516	0.00248498	0.0204124
ENSG00000162105	SHANK2	86.6862	-2.19732	0.865149	-2.53982	0.011091	0.0605982		ENSG00000107551	RASSF4	398.532	-1.63509	0.684113	-2.39009	0.016844	0.0843678
ENSG00000172893	DHCR7	2346.34	2.56589	0.881752	2.90999	0.00361445	0.0265171		ENSG00000165507	C10orf10	281.233	-4.16073	0.953364	-4.36426	1.27551e-05	0.000292763
ENSG00000158483	FAM86C1	30.0177	2.28451	0.958855	2.38254	0.0171935	0.0840757		ENSG00000265354	TIMM23	2014.83	2.5569	0.607878	4.20626	2.59626e-05	0.000526426
ENSG00000137496	IL18BP	151.797	-3.20883	0.68035	-4.71644	2.40005e-06	7.90966e-05		ENSG00000266524	GDF10	13.1515	7.20876	2.50995	2.87208	0.00407782	0.0294391
ENSG00000149357	LAMTOR1	595.521	2.16654	0.650834	3.32886	0.000872007	0.00898401		ENSG00000204172	AGAP9	43.9053	-3.40555	1.14227	-2.9814	0.00286933	0.0226404
ENSG00000186642	PDE2A	58.3487	-6.6275	1.34104	-4.94207	7.72976e-07	3.25219e-05		ENSG00000165633	VSTM4	154.333	2.09313	0.774241	2.70346	0.00686226	0.0435472
ENSG00000137478	FCHSD2	55.0122	-1.98208	0.840592	-2.35795	0.018376	0.0881111		ENSG00000225830	ERCC6	36.9242	-4.66905	1.58922	-2.93794	0.00330401	0.0251823
[truncated: 1,647 more rows]

## Sheet: S2_IPA pathway_adjpvalue 
Supplementary Dataset 1_S2: IPA pathway analysis output with -log(adj p-values) of overlap showed. Filtered for terms that -log(B-H p-values) >1.3 in at least 2 comparisons
Terms	DEG_HCCOrganoid_vs_HCCTissue	DEG_PHx_vs_undamaged_Hepatocytes	DE_HCCOrganoid_vs_HealthyTissue	HCC Mutated_genes
Selenoamino acid metabolism	34.0482	0	15.4309	0
SRP-dependent cotranslational protein targeting to membrane	33.5918	0	15.3637	0
Eukaryotic Translation Elongation	33.702	0	15.2089	0
Eukaryotic Translation Termination	32.18	0	14.6999	0
Response of EIF2AK4 (GCN2) to amino acid deficiency	32.8929	0	12.9768	0
EIF2 Signaling	27.9835	0.457892	13.0776	3.39307
Eukaryotic Translation Initiation	30.3956	0	14.1831	0
Nonsense-Mediated Decay (NMD)	29.099	0	15.4309	0
Neutrophil degranulation	23.1705	0	17.06	0
Hepatic Fibrosis Signaling Pathway	2.24035	0.693256	2.56102	32.0246
Acute Phase Response Signaling	9.77244	2.89242	11.0934	13.6003
Myelination Signaling Pathway	4.92301	0.365678	4.61966	27.1652
Pulmonary Fibrosis Idiopathic Signaling Pathway	2.41584	0.453253	2.13837	32.0246
Molecular Mechanisms of Cancer	0.714522	0.618076	2.87071	32.0846
Hereditary Breast Cancer Signaling	4.22048	0.518123	4.89556	26.3143
Chronic Myeloid Leukemia Signaling	1.61438	0.764582	2.85019	29.2944
Activin Inhibin Signaling Pathway	0.89712	0.271813	2.05993	30.5975
Aryl Hydrocarbon Receptor Signaling	8.70071	4.42871	6.28167	14.1097
Estrogen Receptor Signaling	5.70167	1.30913	6.77846	19.7195
Ribonucleotide Reductase Signaling Pathway	3.23692	0.826425	2.43516	27.0088
Regulation of the Epithelial-Mesenchymal Transition Pathway	0.588621	0	1.98938	30.3598
Senescence Pathway	1.91063	1.65628	1.86148	26.9629
Regulation Of The Epithelial Mesenchymal Transition By Growth Factors Pathway	1.48167	0.228366	2.08974	28.4262
CLEAR Signaling Pathway	5.28523	2.4609	4.96497	18.4155
Acute Myeloid Leukemia Signaling	1.53233	0.348636	2.23793	26.2854
LXR/RXR Activation	12.0337	2.89242	14.0494	1.04378
Production of Nitric Oxide and Reactive Oxygen Species in Macrophages	5.29404	2.14296	5.41197	17.0215
Xenobiotic Metabolism Signaling	6.61788	1.76095	5.90209	14.6846
Glucocorticoid Receptor Signaling	6.97469	1.31786	4.24184	16.2646
HER-2 Signaling in Breast Cancer	4.46671	1.16805	2.98315	19.6396
NGF Signaling	1.15108	0.787241	2.43565	23.7743
Huntington's Disease Signaling	7.58816	1.70765	5.28414	13.4543
Role of Tissue Factor in Cancer	1.10696	0.16574	3.57965	22.9334
HIF1α Signaling	3.91597	0.732175	2.33104	20.7806
MSP-RON Signaling In Cancer Cells Pathway	3.41334	0.706176	2.82912	20.6353
ID1 Signaling Pathway	3.46306	0.453253	2.40717	21.2447
DHCR24 Signaling Pathway	7.17821	3.09239	8.94039	8.05328
RAR Activation	2.10757	0	4.91847	19.7415
NRF2-mediated Oxidative Stress Response	8.33825	4.4777	4.89556	8.98035
Pancreatic Adenocarcinoma Signaling	0.55081	0.319189	1.47146	24.3418
Sirtuin Signaling Pathway	10.7512	1.75962	11.2035	2.86168
Germ Cell-Sertoli Cell Junction Signaling	6.00668	0.250388	5.83389	14.4121
Glioblastoma Multiforme Signaling	2.17995	0	1.78989	22.4784
FGF Signaling	0.829775	0.924864	1.66475	22.9334
TR/RXR Activation	5.7726	0.732175	7.44239	12.2247
Transcriptional Regulatory Network in Embryonic Stem Cells	0.744578	0.466631	1.81816	23.027
Xenobiotic Metabolism General Signaling Pathway	4.23906	0.826194	2.16158	18.287
RHO GTPase cycle	12.4469	0	12.9768	0
Major pathway of rRNA processing in the nucleolus and cytosol	16.9786	0	8.09535	0
Glioma Signaling	2.10572	1.12881	1.94983	19.7342
p53 Signaling	2.97883	0.521124	2.44542	18.9429
IL-12 Signaling and Production in Macrophages	5.33858	1.8151	3.9425	13.7544
PXR/RXR Activation	13.4181	1.78977	8.94039	0.430319
Endocannabinoid Cancer Inhibition Pathway	0.814506	0.787241	2.75736	20.0182
STAT3 Pathway	2.4519	0.963229	2.01885	18.9024
Epithelial Adherens Junction Signaling	5.7637	0.518123	4.59355	13.2946
ILK Signaling	5.33373	0.189042	4.82873	13.6698
IGF-1 Signaling	3.98463	0.348636	4.84143	14.8288
PTEN Signaling	2.7943	0.177745	1.09761	19.7342
EGF Signaling	1.55762	0.384231	2.51807	19.3415
PI3K/AKT Signaling	3.2281	1.79243	2.02621	16.4839
Colorectal Cancer Metastasis Signaling	1.47119	0	3.52047	18.2322
Prostate Cancer Signaling	1.57134	1.33182	1.69613	18.5417
Mouse Embryonic Stem Cell Pluripotency	0.875363	0	2.72751	19.5028
IL-6 Signaling	2.46266	0.199927	3.09672	17.2472
Role Of Osteoclasts In Rheumatoid Arthritis Signaling Pathway	3.93261	0.239974	1.50588	17.3154
PPARα/RXRα Activation	2.95753	1.46839	6.2481	12.2197
Neurotrophin/TRK Signaling	1.58855	0.826194	1.24713	18.8219
14-3-3-mediated Signaling	3.89393	1.8151	3.5207	13.2145
Autophagy	2.49886	0.792595	2.46991	16.5212
Sperm Motility	0.714768	0	1.80652	19.7576
Macrophage Alternative Activation Signaling Pathway	5.34419	1.77957	3.91468	10.7957
Ovarian Cancer Signaling	0.397688	0	2.03186	19.221
ATM Signaling	0.994064	1.96267	1.11434	17.5771
Complement System	10.7572	0.453253	10.3968	0
Hypoxia Signaling in the Cardiovascular System	7.63695	1.76265	2.51764	9.66861
ERBB Signaling	1.0046	0.207941	1.86148	18.3118
Aggrephagy	11.686	0	9.39726	0
mTOR Signaling	8.55526	0.207899	4.69096	7.53705
PDGF Signaling	1.45023	0.506803	0.947634	17.7525
Sumoylation Pathway	8.9853	0.363456	3.08431	7.93963
Natural Killer Cell Signaling	2.30636	0.280291	2.08974	15.6453
Renal Cell Carcinoma Signaling	2.84024	0.595678	3.00884	13.8055
Remodeling of Epithelial Adherens Junctions	10.2851	0.787241	7.69484	1.34551
Mitochondrial Dysfunction	6.61898	2.509	5.88042	5.0422
Th1 and Th2 Activation Pathway	4.1107	0.239974	3.12879	12.4652
Role of Macrophages, Fibroblasts and Endothelial Cells in Rheumatoid Arthritis	0.95238	0.80022	3.40598	14.7193
AMPK Signaling	2.48408	0.814899	4.64865	11.8674
Endocannabinoid Developing Neuron Pathway	0.535279	0.421801	1.43696	17.3946
IL-8 Signaling	2.31373	0.302074	2.96991	14.1097
IL-10 Signaling	5.31243	1.26544	4.84143	8.15868
Th2 Pathway	4.29065	0	3.54852	11.6174
Phase I - Functionalization of compounds	9.703	0	9.74013	0
Integrin Signaling	5.64774	0.555727	3.36031	9.87339
Clathrin-mediated Endocytosis Signaling	5.56672	1.23829	5.33074	7.00229
JAK/STAT Signaling	2.63607	0.421801	3.50883	12.3994
Cardiac Hypertrophy Signaling	1.10899	0.228366	3.23069	14.3417
Role of Osteoblasts, Osteoclasts and Chondrocytes in Rheumatoid Arthritis	0	0.222382	1.73439	16.8064
Cardiac Hypertrophy Signaling (Enhanced)	0.493993	0.268754	1.93975	16.0136
Thyroid Cancer Signaling	1.8246	0.310019	1.46361	14.9774
Sertoli Cell-Sertoli Cell Junction Signaling	5.41743	0	6.06048	7.0648
Renin-Angiotensin Signaling	1.31921	0.348636	3.25571	13.6127
Ephrin Receptor Signaling	3.41588	0.348636	2.83157	11.9022
FXR/RXR Activation	4.86297	7.46525	2.97484	3.14333
FLT3 Signaling in Hematopoietic Progenitor Cells	1.66752	0.421801	1.58747	14.6827
Serotonin Receptor Signaling	1.44998	1.61179	1.94983	13.2718
ERK5 Signaling	4.60467	0.693256	3.00884	9.8128
Gap Junction Signaling	3.74526	1.17198	6.58308	6.58607
MicroRNA Biogenesis Signaling Pathway	1.82324	0.664809	2.0576	13.4948
Role Of Osteoblasts In Rheumatoid Arthritis Signaling Pathway	0	0.162986	1.81531	15.9898
Regulation of eIF4 and p70S6K Signaling	7.73026	0.280291	4.88862	4.99716
Non-Small Cell Lung Cancer Signaling	0.981282	0.199927	1.81442	14.6846
IL-7 Signaling Pathway	1.08097	0	1.51086	15.083
Role of NANOG in Mammalian Embryonic Stem Cell Pluripotency	0.27534	0.138011	1.75993	15.4661
Signaling by Rho Family GTPases	3.91189	0	4.24184	9.47528
ERK/MAPK Signaling	3.35283	0.80022	2.1289	11.3411
Phagosome Maturation	9.55905	2.01796	5.90209	0
RHO GTPases activate IQGAPs	8.95763	0	8.50754	0
Mitotic Metaphase and Anaphase	10.8711	0	6.58308	0
CNTF Signaling	0.957873	0.22608	2.07088	13.8079
Axonal Guidance Signaling	3.60801	0.472778	2.05066	10.93
Hepatic Fibrosis / Hepatic Stellate Cell Activation	3.52241	0	2.91986	10.5938
MHC class II antigen presentation	9.82874	0	7.18822	0
VEGF Signaling	2.91074	0.280291	2.71129	11.0904
LPS/IL-1 Mediated Inhibition of RXR Function	5.86775	2.32956	7.5221	1.26165
Cell Cycle: G2/M DNA Damage Checkpoint Regulation	2.68647	1.96267	2.53353	9.72367
S100 Family Signaling Pathway	0.51391	0	2.59103	13.6127
Melanocyte Development and Pigmentation Signaling	1.03725	0.28343	3.07559	12.1924
Protein folding	8.60751	0	7.96514	0
Insulin Secretion Signaling Pathway	2.42613	1.12264	4.39148	8.60444
Telomerase Signaling	1.57062	0.766377	1.70426	12.4807
Heme signaling	8.12431	0	8.34075	0
Osteoarthritis Pathway	2.47878	0	4.11485	9.76985
Mitotic G2-G2/M phases	9.33949	0	7.01001	0
Adipogenesis pathway	3.8055	0.238311	2.60021	9.70275
Semaphorin Neuronal Repulsive Signaling Pathway	0.890274	0.363456	2.11286	12.7493
Neuroinflammation Signaling Pathway	2.30693	0.276808	1.31075	12.2197
Insulin Receptor Signaling	1.73246	0.336341	2.55194	11.4441
GNRH Signaling	0.647615	0.49485	1.55486	13.2946
UVB-Induced MAPK Signaling	0.911387	0.4411	1.41025	13.2014
RHO GTPases Activate Formins	10.3847	0	5.56342	0
Growth Hormone Signaling	1.37062	0.518123	2.8694	11.1573
Role of JAK1 and JAK3 in γc Cytokine Signaling	2.44017	0.138387	1.9685	11.3292
Prolactin Signaling	3.19799	0.558637	3.63667	8.39146
Response to elevated platelet cytosolic Ca2+	8.66322	0	7.04062	0
Estrogen-Dependent Breast Cancer Signaling	3.41588	0.984013	2.14499	9.15447
Superpathway of Melatonin Degradation	8.745	0.558637	6.33963	0
Gα12/13 Signaling	1.33665	0.179637	1.23646	12.8096
Pulmonary Healing Signaling Pathway	1.83968	0	1.68156	12.0382
Adrenomedullin signaling pathway	0.635646	0.276808	3.43943	11.1995
BEX2 Signaling Pathway	1.66752	0.421801	2.14499	11.3133
Synaptogenesis Signaling Pathway	2.36378	0.49485	3.20311	9.4407
TCR signaling	10.3873	0	5.05604	0
Fcγ Receptor-mediated Phagocytosis in Macrophages and Monocytes	5.86635	0.453253	3.35205	5.70047
PD-1, PD-L1 cancer immunotherapy pathway	2.43416	0.348636	1.98976	10.5637
Post-translational protein phosphorylation	7.98362	0	7.3428	0
Oxytocin Signaling Pathway	0.990791	1.16805	2.718	10.4466
ESR-mediated signaling	7.2239	0	8.09535	0
Estrogen Biosynthesis	6.83964	1.36486	7.06376	0
Opioid Signaling Pathway	1.01705	0.356933	1.86148	11.9988
Role of JAK family kinases in IL-6-type Cytokine Signaling	2.84024	1.96267	3.00884	7.41799
Xenobiotic Metabolism CAR Signaling Pathway	6.13127	1.27035	4.30218	3.49994
Leukocyte Extravasation Signaling	5.49695	0.150502	2.0576	7.48793
Circadian Clock	7.86578	0	7.32505	0
Coronavirus Pathogenesis Pathway	5.47628	0.935918	2.29652	6.41106
Th1 Pathway	2.52753	0.453253	1.39898	10.6082
Gap junction trafficking and regulation	8.9403	0	5.98946	0
Nicotine Degradation II	8.90836	0.571431	5.40545	0
MSP-RON Signaling In Macrophages Pathway	4.47907	0.618076	1.72389	8.02637
Plasma lipoprotein assembly, remodeling, and clearance	8.85187	0	5.96494	0
Angiopoietin Signaling	1.41246	0.465894	2.18227	10.7247
HSP90 chaperone cycle for steroid hormone receptors in the presence of ligand	8.65061	0	6.07874	0
Thrombopoietin Signaling	1.78439	0.454874	1.7067	10.7523
Nicotine Degradation III	8.99658	0.731232	4.8645	0
Transcriptional regulation by RUNX1	8.50408	0	6.06048	0
WNT/β-catenin Signaling	0.474968	0.416675	3.04019	10.6304
Protein Kinase A Signaling	2.07148	1.62765	4.27723	6.54633
Actin Cytoskeleton Signaling	4.46671	0	3.98434	6.00037
IL-9 Signaling	1.53233	0.282623	2.29188	10.2895
Role of NFAT in Cardiac Hypertrophy	0.584266	0.472778	1.51184	11.7905
IL-2 Signaling	2.2018	0	2.43089	9.72367
Neuregulin Signaling	2.21194	0.377616	1.80877	9.95665
Regulation of lipid metabolism by PPARalpha	8.65061	0	5.65156	0
Apelin Endothelial Signaling Pathway	1.2883	0.228366	2.24226	10.4912
Type II Diabetes Mellitus Signaling	1.1305	1.55264	0.754909	10.7574
Role of PKR in Interferon Induction and Antiviral Response	0.62797	4.17705	0.351058	8.95888
TGF-β Signaling	1.78405	0	1.01829	11.2994
Bupropion Degradation	6.22721	1.11682	6.73335	0
GDNF Family Ligand-Receptor Interactions	1.16037	0	2.18227	10.7247
Phase II - Conjugation of compounds	9.04208	0	5.01538	0
Regulation of Insulin-like Growth Factor (IGF) transport and uptake by IGFBPs	7.57971	0	6.47435	0
Xenobiotic Metabolism PXR Signaling Pathway	5.36011	1.71625	5.83923	1.10973
VEGF Family Ligand-Receptor Interactions	1.08879	0.271813	1.49818	11.1573
NAD Signaling Pathway	2.7943	1.3247	4.69512	5.16432
Reelin Signaling in Neurons	1.37749	0	1.90271	10.6404
SPINK1 General Cancer Pathway	1.46869	0.261807	1.9685	10.2203
ERB2-ERBB3 Signaling	1.66752	0.165436	1.3115	10.577
Melatonin Degradation I	8.33825	0.454874	4.88862	0
PPAR Signaling	2.75069	0.584488	3.49603	6.83883
Polyamine Regulation in Colon Cancer	2.83134	0	1.9401	8.87017
Cell Cycle Checkpoints	9.04339	0	4.55219	0
Acetone Degradation I (to Methylglyoxal)	6.18772	1.59819	5.80613	0
Signaling by NOTCH4	8.412	0	5.15771	0
GM-CSF Signaling	0.936386	0.250388	2.22889	10.1396
Ceramide Signaling	2.09386	0.621738	1.20849	9.6302
RAC Signaling	2.36028	0	1.30493	9.79807
UVA-Induced MAPK Signaling	0.693266	0.93444	1.64027	10.1543
Ephrin A Signaling	2.2728	0.327771	3.13152	7.67272
Class I MHC mediated antigen processing and presentation	7.39077	0	5.98814	0
Neutrophil Extracellular Trap Signaling Pathway	2.68716	0.466631	2.85092	7.37066
Arachidonic acid metabolism	7.79121	0	5.28414	0
Role of JAK2 in Hormone-like Cytokine Signaling	3.46306	0.328145	4.63652	4.58734
PAK Signaling	1.46058	0	1.58186	9.95665
GP6 Signaling Pathway	1.76859	0	1.6499	9.42076
RHOGDI Signaling	5.17502	0	4.65782	2.99452
Translocation of SLC2A4 (GLUT4) to the plasma membrane	7.17391	0	5.55856	0
Iron homeostasis signaling pathway	4.58837	0.911936	2.37597	4.85424
RAF/MAP kinase cascade	7.63695	0	5.00426	0
P2Y Purigenic Receptor Signaling Pathway	1.33665	0.618076	2.35062	8.23379
Transcriptional regulation by RUNX3	8.85187	0	3.55475	0
CXCR4 Signaling	1.6224	0	3.06002	7.60656
eNOS Signaling	0.645198	1.23829	1.48931	8.90279
G-Protein Coupled Receptor Signaling	0	0	1.81746	10.4466
Factors Promoting Cardiogenesis in Vertebrates	0	0.453253	1.58447	9.89115
Hepatic Cholestasis	3.80099	1.11682	4.51266	2.44557
NR1H2 and NR1H3-mediated signaling	6.77591	0	5.09812	0
Thrombin Signaling	1.15527	0.234094	3.28387	7.19672
ABRA Signaling Pathway	4.68318	0	4.31676	2.69716
COPI-mediated anterograde transport	7.00077	0	4.69096	0
Mitotic Prometaphase	6.61898	0	5.00081	0
Leptin Signaling in Obesity	0.305603	0.465894	3.22022	7.60588
Nitric Oxide Signaling in the Cardiovascular System	0	0.787241	1.92689	8.87301
Ferroptosis Signaling Pathway	4.35131	1.46981	2.72751	3.00506
PFKFB4 Signaling Pathway	1.03076	0.707385	1.93044	7.58484
Cytoprotection by HMOX1	6.07306	0	5.11009	0
Xenobiotic Metabolism AHR Signaling Pathway	4.7076	1.75962	1.88148	2.83148
Paxillin Signaling	1.85823	0	1.51184	7.72965
DNA Methylation and Transcriptional Repression Signaling	2.01915	2.68816	1.64027	4.71556
RORA activates gene expression	5.6606	0	5.34376	0
WNK Renal Signaling Pathway	1.64191	0.454874	1.11961	7.77895
Apelin Pancreas Signaling Pathway	0.312709	0.17379	1.44487	8.94089
Regulation of mitotic cell cycle	6.56929	0	4.26219	0
Protein Ubiquitination Pathway	5.60957	1.46839	2.22082	1.45058
Histone Modification Signaling Pathway	5.06134	0	5.56342	0
Sphingosine-1-phosphate Signaling	0.978353	0.787241	1.69025	7.10914
Glucose metabolism	5.93632	0	4.60028	0
Cholecystokinin/Gastrin-mediated Signaling	2.69825	0	1.50869	6.31083
Hedgehog 'off' state	5.82327	0	4.59355	0
Parkinson's Signaling	5.03838	0.105111	4.72967	0.531777
Maturity Onset Diabetes of Young (MODY) Signaling	3.67308	2.31937	2.65899	1.71638
White Adipose Tissue Browning Pathway	2.05904	0.731232	2.65098	4.85424
MAPK6/MAPK4 signaling	7.16389	0	3.12981	0
TP53 Regulates Metabolic Genes	6.02443	0	4.26219	0
ABC-family proteins mediated transport	7.64559	0	2.5898	0
CREB Signaling in Neurons	0	0	2.33591	7.86579
KEAP1-NFE2L2 pathway	7.27799	0	2.87276	0
Synthesis of DNA	6.61898	0	3.38512	0
Virus Entry via Endocytic Pathways	2.75069	0.16574	1.54491	5.53567
Activation of gene expression by SREBF (SREBP)	3.26038	0	6.67496	0
Signaling by NOTCH1	4.19947	0	5.73496	0
Signaling by VEGF	4.55255	0	5.38169	0
Cyclins and Cell Cycle Regulation	0.829775	1.49989	0.465903	7.0648
Pathogen Induced Cytokine Storm Signaling Pathway	3.62784	0.385438	2.61934	3.17056
Androgen Signaling	1.05465	0.842871	2.52101	5.33351
Docosahexaenoic Acid (DHA) Signaling	1.05295	0.674828	1.82077	6.19574
Assembly and cell surface presentation of NMDA receptors	4.71766	0	5.00081	0
Amyloid fiber formation	4.71766	0	4.8443	0
PTEN Regulation	6.41065	0	3.12879	0
Breast Cancer Regulation by Stathmin1	0.452192	0	3.35147	5.58565
Mitotic G1 phase and G1/S transition	6.37472	0	3.00677	0
Oxidative Phosphorylation	3.85001	1.96267	3.49603	0
DNA Replication Pre-Initiation	6.25405	0	3.02967	0
Regulation of Apoptosis	5.63065	0	3.63667	0
Circadian Rhythm Signaling	1.24543	0.348636	2.18657	5.425
L1CAM interactions	4.02903	0	5.12837	0
Deubiquitination	4.94697	0	4.15871	0
IL-13 Signaling Pathway	0.745748	0.276808	1.62255	6.43587
BMAL1:CLOCK,NPAS2 activates circadian gene expression	4.92418	0	3.93303	0
Nuclear Cytoskeleton Signaling Pathway	5.81236	0	3.02748	0
Atherosclerosis Signaling	3.85001	0.984013	2.62163	1.3552
TCF dependent signaling in response to WNT	4.15053	0	4.63652	0
Activation of NMDA receptors and postsynaptic events	4.53634	0	4.20074	0
HIPPO signaling	0.997907	1.16805	2.1626	4.37649
Gαq Signaling	1.03552	0.171399	1.43939	6.02406
Degradation of beta-catenin by the destruction complex	5.14826	0	3.49603	0
Tight Junction Signaling	2.53209	0.580805	3.86657	1.66112
Cellular response to hypoxia	6.0149	0	2.58905	0
Regulation of Actin-based Motility by Rho	5.23201	0.179637	2.40863	0.724572
ROBO SLIT Signaling Pathway	3.89393	0	4.63591	0
RHOA Signaling	3.74526	0.228366	2.51807	1.99426
Regulation of RUNX2 expression and activity	5.7362	0	2.72812	0
C-type lectin receptors (CLRs)	5.60957	0	2.85019	0
Interleukin-4 and Interleukin-13 signaling	4.80923	0	3.63525	0
Mitotic Roles of Polo-Like Kinase	0.823723	2.01796	1.22118	4.34575
Signaling by CSF3 (G-CSF)	3.65045	0	4.72967	0
Agrin Interactions at Neuromuscular Junction	1.76005	0	0.542978	6.07407
MSP-RON Signaling Pathway	1.16037	0	2.35658	4.7932
FLT3 Signaling	3.94249	0	4.30526	0
Coronavirus Replication Pathway	3.31489	1.8151	3.08709	0
Interferon gamma signaling	4.06707	0	4.14979	0
EPH-Ephrin signaling	4.49588	0	3.72023	0
Cachexia Signaling Pathway	4.92848	0	3.23814	0
FOXO-mediated transcription	5.33858	0	2.77068	0
Signaling by ROBO receptors	5.99171	0	2.09178	0
Metabolism of polyamines	5.35095	0	2.66697	0
SUMOylation of transcription cofactors	5.19666	0	2.75765	0
Mitophagy	5.02851	0	2.86748	0
Hedgehog ligand biogenesis	5.66876	0	2.21957	0
Semaphorin interactions	4.71841	0	3.03486	0
VDR/RXR Activation	1.87733	0.453253	0.654434	4.71177
Transcriptional regulation of white adipocyte differentiation	5.01362	0	2.66697	0
Glycolysis I	4.17621	0.215111	3.277	0
NFE2L2 regulates pentose phosphate pathway genes	4.46791	0	3.09672	0
fMLP Signaling in Neutrophils	1.20392	0.282231	1.71768	4.35836
Aldosterone Signaling in Epithelial Cells	1.50563	0.984013	1.05292	3.94297
NIK-->noncanonical NF-kB signaling	5.23371	0	2.21487	0
Folate Signaling Pathway	4.10323	0	3.33571	0
Death Receptor Signaling	1.57134	0.967615	0.858606	4.01076
S Phase	4.40528	0	2.9643	0
Signaling by CSF1 (M-CSF) in myeloid cells	3.4845	0	3.87262	0
Metabolism of water-soluble vitamins and cofactors	4.26897	0	3.05369	0
Integration of energy metabolism	2.6712	0	4.61966	0
ISG15 antiviral mechanism	3.07771	0	4.1267	0
Complement cascade	3.38303	0	3.67786	0
TNFR2 non-canonical NF-kB pathway	5.30305	0	1.72389	0
Interleukin-1 family signaling	4.1165	0	2.83084	0
Carboxyterminal post-translational modifications of tubulin	3.85001	0	3.08709	0
Mitochondrial biogenesis	3.73782	0	3.03486	0
Transcriptional activity of SMAD2/SMAD3:SMAD4 heterotrimer	4.45291	0	2.29652	0
Bile acid and bile salt metabolism	3.4845	0	3.25909	0
IL-1 Signaling	0	0.189042	1.72027	4.79066
Role of IL-17F in Allergic Inflammatory Airway Diseases	1.78405	0.16574	1.09556	3.51576
Relaxin Signaling	0.349735	0.347351	2.14539	3.71505
Unfolded protein response	1.84332	2.63841	0.524708	1.50517
Antiproliferative Role of Somatostatin Receptor 2	0.553234	0.199927	1.82761	3.92227
Caveolar-mediated Endocytosis Signaling	2.39366	0.348636	1.93562	1.80462
Intra-Golgi and retrograde Golgi-to-ER traffic	4.54944	0	1.9319	0
Microautophagy Signaling Pathway	4.52423	0	1.9527	0
Transcriptional Regulation by MECP2	3.36557	0	3.10668	0
Signaling by FGFR4	2.27497	0	4.14036	0
Phagosome Formation	0.521167	0	1.9319	3.95681
Signaling by FGFR2	2.91074	0	3.4744	0
Glioma Invasiveness Signaling	1.84643	0	0.455767	4.08037
Inhibition of ARE-Mediated mRNA Degradation Pathway	3.05975	0.769591	1.8545	0.688752
Toll-like Receptor Signaling	0.690978	0.453253	2.06666	3.10933
Signaling by ERBB4	2.83134	0	3.48492	0
Metallothioneins bind metals	2.32622	0	3.98434	0
Signaling by NTRK1 (TRKA)	3.08116	0	3.21085	0
Antigen Presentation Pathway	3.52047	0.943407	1.56423	0.255149
Interleukin-15 signaling	3.22202	0	3.06002	0
iNOS Signaling	1.78405	0.731232	1.09556	2.65501
Cellular response to heat stress	3.43396	0	2.83157	0
Cilium Assembly	3.04051	0	3.21069	0
Role of MAPK Signaling in Promoting the Pathogenesis of Influenza	1.57134	0.186796	0.270728	4.16073
p75 NTR receptor-mediated signalling	3.2145	0	2.9643	0
NFE2L2 regulating anti-oxidant/detoxification enzymes	4.45411	0	1.64027	0
Mitochondrial protein import	3.73782	0	2.28905	0
Notch Signaling	1.32164	0	1.64027	3.06457
NAFLD Signaling Pathway	3.656	0	2.3605	0
Signaling by Insulin receptor	3.55729	0	2.40717	0
RHO GTPases activate PKNs	2.17995	0	3.73193	0
Costimulation by the CD28 family	3.76016	0	2.06666	0
Sertoli Cell-Germ Cell Junction Signaling Pathway (Enhanced)	2.2728	0	3.54286	0
Synaptic Long Term Potentiation	0.459666	0.80022	2.14436	2.4097
Electron transport, ATP synthesis, and heat production by uncoupling proteins	3.47919	0	2.31928	0
Protein Sorting Signaling Pathway	2.37605	0	3.38512	0
Interleukin-3, Interleukin-5 and GM-CSF signaling	2.75223	0	3.00884	0
Superpathway of Inositol Phosphate Compounds	1.04051	0	1.34296	3.27175
SUMOylation of intracellular receptors	3.98463	0	1.65115	0
MyD88:MAL(TIRAP) cascade initiated on plasma membrane	2.18373	0	3.42892	0
Cell Cycle Control of Chromosomal Replication	1.55762	2.07962	0.963823	0.998039
Superpathway of Methionine Degradation	2.46266	1.17198	1.93487	0
RUNX1 regulates megakaryocyte differentiation and platelet function	3.87479	0	1.68534	0
Necroptosis Signaling Pathway	1.63499	0.238311	1.15404	2.51537
Nucleotide Excision Repair	2.69979	0	2.83157	0
Clathrin-mediated endocytosis	2.70463	0	2.77398	0
Signaling by EGFR	1.9408	0	3.49603	0
Coagulation System	2.40439	1.88689	0.841453	0.284063
Signaling by MET	3.67308	0	1.72389	0
Beta-catenin independent WNT signaling	1.82324	0	3.49603	0
Eicosanoid Signaling	1.89837	0	3.40337	0
Hematoma Resolution Signaling Pathway	2.7943	0	2.50743	0
Senescence-Associated Secretory Phenotype (SASP)	2.91074	0	2.36781	0
Dopamine-DARPP32 Feedback in cAMP Signaling	0	1.62765	1.03303	2.52546
Gene and protein expression by JAK-STAT signaling after IL-12 stimulation	3.80468	0	1.34089	0
MAPK targets/ Nuclear events mediated by MAP kinases	2.12756	0	3.00884	0
Agranulocyte Adhesion and Diapedesis	3.03735	0	2.08993	0
Cristae formation	2.8748	0	2.23956	0
Serotonin Degradation	2.52315	0.518123	2.05066	0
Signaling by FGFR3	1.92766	0	3.15717	0
Gluconeogenesis I	2.84957	0	2.20073	0
Hedgehog 'on' state	3.08803	0	1.9319	0
Signaling by NOTCH3	1.9408	0	3.03809	0
Signaling by ERBB2	2.34116	0	2.62163	0
Smooth Muscle Contraction	2.10024	0	2.85095	0
Processing of Capped Intron-Containing Pre-mRNA	3.08504	0	1.84232	0
Role of IL-17A in Psoriasis	2.43416	0.138011	2.35409	0
Iron uptake and transport	2.91746	0	2.00631	0
Multiple Sclerosis Signaling Pathway	2.10757	0	1.56448	1.20289
Semaphorin Signaling in Neurons	2.27497	0	0.414811	2.16859
Cytosolic sensors of pathogen-associated DNA	2.70246	0	2.14845	0
Regulation of TP53 Expression and Degradation	2.01915	0	2.81419	0
NER (Nucleotide Excision Repair, Enhanced Pathway)	1.53233	0.348636	1.44487	1.50517
Macrophage Classical Activation Signaling Pathway	1.75828	0.512393	0.979682	1.53702
G alpha (12/13) signalling events	2.76703	0	1.9527	0
Chaperone Mediated Autophagy	1.83815	0	2.87858	0
Retinoate Biosynthesis I	2.10024	0.208423	2.40717	0
IL-17A Signaling in Gastric Cells	1.44758	0	0.454636	2.77527
UFMylation Signaling Pathway	2.58083	0	2.07844	0
SUMOylation of DNA replication proteins	2.34782	0	2.22889	0
Formation of Fibrin Clot (Clotting Cascade)	2.96082	0	1.56423	0
Regulation of TLR by endogenous ligand	1.46058	0	3.04019	0
Transcriptional regulation of granulopoiesis	2.68647	0	1.79271	0
trans-Golgi Network Vesicle Budding	1.78815	0	2.65689	0
RHO GTPases Activate ROCKs	1.66539	0	2.77068	0
MyD88-independent TLR4 cascade	2.68647	0	1.70766	0
Regulation of mRNA stability by proteins that bind AU-rich elements	1.6224	0	2.75765	0
Immunogenic Cell Death Signaling Pathway	0.904802	1.96267	0	1.50517
ISGylation Signaling Pathway	2.09464	0	2.20932	0
Endoplasmic Reticulum Stress Pathway	0.412121	1.8151	0	2.06768
The citric acid (TCA) cycle and respiratory electron transport	2.34116	0	1.86703	0
Peroxisomal protein import	2.49886	0	1.7067	0
Carnitine metabolism	2.43416	0	1.73104	0
Signaling by TGF-beta Receptor Complex	2.49823	0	1.66489	0
Valine Degradation I	0.744578	1.88415	1.52998	0
Aspirin ADME	1.76859	0	2.35409	0
Signaling by SCF-KIT	1.69042	0	2.40717	0
Glycosaminoglycan metabolism	2.41414	0	1.68156	0
Transcriptional regulation by the AP-2 (TFAP2) family of transcription factors	2.30136	0	1.78925	0
Pentose Phosphate Pathway	1.61438	0.179637	2.25299	0
Pentose Phosphate Pathway (Oxidative Branch)	1.35207	0.348636	2.2513	0
TP53 Regulates Transcription of Cell Cycle Genes	2.01915	0	1.93044	0
Extracellular matrix organization	1.90723	0	2.03916	0
Retinoid metabolism and transport	1.6224	0	2.31547	0
RAF-independent MAPK1/3 activation	1.72263	0	2.16836	0
Signaling by PDGF	2.49757	0	1.3816	0
Regulation of TP53 Activity through Methylation	1.66539	0	2.15819	0
Signaling by NTRK3 (TRKC)	1.92648	0	1.88148	0
Superpathway of Serine and Glycine Biosynthesis I	0.678686	1.65628	1.34521	0
MyD88 dependent cascade initiated on endosome	1.85963	0	1.80652	0
RET signaling	1.4766	0	2.16354	0
Granulocyte Adhesion and Diapedesis	2.1852	0	1.43508	0
Ion channel transport	2.18349	0	1.42693	0
Extra-nuclear estrogen signaling	1.84643	0	1.74933	0
Cargo concentration in the ER	1.60867	0	1.94983	0
ERCC6 (CSB) and EHMT2 (G9a) positively regulate rRNA expression	2.2018	0	1.34089	0
Regulation of beta-cell development	1.77151	0	1.70766	0
Signaling by NTRK2 (TRKB)	1.53233	0	1.9401	0
Nucleotide catabolism	1.96003	0	1.48597	0
Kinesins	1.91063	0	1.51911	0
Protein ubiquitination	1.52704	0	1.89658	0
GPVI-mediated activation cascade	1.53233	0	1.86703	0
Gene Silencing by RNA	1.87733	0	1.5213	0
Interleukin-7 signaling	1.46058	0	1.90542	0
Aryl hydrocarbon receptor signalling	1.66882	0	1.66485	0
Atorvastatin ADME	1.66882	0	1.66485	0
Pentose phosphate pathway	1.66882	0	1.66485	0
RNA Polymerase III Transcription	1.84643	0	1.42857	0
Endosomal Sorting Complex Required For Transport (ESCRT)	1.44849	0	1.80652	0
Signaling by Leptin	1.61438	0	1.59764	0
B-WICH complex positively regulates rRNA expression	1.46993	0	1.72382	0
Transport of bile salts and organic acids, metal ions and amine compounds	1.6224	0	1.54319	0
Signaling by PTK6	1.61438	0	1.55105	0
RNA Polymerase II Transcription	1.43501	0	1.71491	0
Cargo recognition for clathrin-mediated endocytosis	1.60867	0	1.51184	0
Metabolism of steroid hormones	1.53233	0	1.48616	0
Amino acids regulate mTORC1	1.30465	0	1.55105	0
DNA Damage Bypass	1.37749	0	1.32294	0

## Sheet: S3_IPA pathway_Figure_S1
Supplementary Dataset 1_S3: Selected pathways used for Fig from IPA pathways analysis output from S2. Filtered for terms that -log(B-H p-values) >1.3 in at least 2 comparisons
Terms	DEG_HCCOrganoid_vs_HCCTissue	DEG_PHx_vs_undamaged_Hepatocytes	DE_HCCOrganoid_vs_HealthyTissue	HCC Mutated_genes	significant in 2,3 or 4 comparisons
MAPK6/MAPK4 signaling	7.16389	0	3.12981	0	2
Signaling by NOTCH1	4.19947	0	5.73496	0	2
TCF dependent signaling in response to WNT	4.15053	0	4.63652	0	2
Signaling by MET	3.67308	0	1.72389	0	2
Signaling by CSF1 (M-CSF) in myeloid cells	3.4845	0	3.87262	0	2
Signaling by FGFR2	2.91074	0	3.4744	0	2
mTOR Signaling	8.55526	0.207899	4.69096	7.53705	3
IGF-1 Signaling	3.98463	0.348636	4.84143	14.8288	3
ID1 Signaling Pathway	3.46306	0.453253	2.40717	21.2447	3
Cholecystokinin/Gastrin-mediated Signaling	2.69825	0	1.50869	6.31083	3
AMPK Signaling	2.48408	0.814899	4.64865	11.8674	3
IL-6 Signaling	2.46266	0.199927	3.09672	17.2472	3
Neuregulin Signaling	2.21194	0.377616	1.80877	9.95665	3
Insulin Receptor Signaling	1.73246	0.336341	2.55194	11.4441	3
EGF Signaling	1.55762	0.384231	2.51807	19.3415	3
HIPPO signaling	0.997907	1.16805	2.1626	4.37649	3
Estrogen Receptor Signaling	5.70167	1.30913	6.77846	19.7195	4
NAD Signaling Pathway	2.7943	1.3247	4.69512	5.16432	4

## Sheet: S4_Output IPA pathway_activity 
Supplementary Dataset 1_S4: IPA pathway analysis output indicating the activity z-score. Filtered for terms that -log(B-H p-values) >1.3 in at least 2 comparisons.
Canonical Pathways	DEG_HCCOrganoid_vs_HCCTissue	DEG_PHx_vs_undamaged_Hepatocytes	DE_HCCOrganoid_vs_HealthyTissue	HCC Mutated_genes
Selenoamino acid metabolism	7.239	NA	5.824	NA
SRP-dependent cotranslational protein targeting to membrane	8.544	NA	7.348	NA
Eukaryotic Translation Elongation	8.124	NA	6.928	NA
Eukaryotic Translation Termination	8	NA	6.856	NA
Response of EIF2AK4 (GCN2) to amino acid deficiency	7.761	NA	6.856	NA
EIF2 Signaling	4.737	0.302	3.244	NA
Eukaryotic Translation Initiation	8.25	NA	6.804	NA
Nonsense-Mediated Decay (NMD)	8.066	NA	6.607	NA
Neutrophil degranulation	1.151	NA	-0.338	NA
Hepatic Fibrosis Signaling Pathway	-2.462	0	-2.39	NA
Acute Phase Response Signaling	-3.087	-0.243	-2.874	NA
Myelination Signaling Pathway	-3.16	-1.279	-3.022	NA
Pulmonary Fibrosis Idiopathic Signaling Pathway	-2.782	-1.279	-3.576	NA
[truncated: 455 more rows]

## Sheet: S5_path_activity for Figure_1
Supplementary Dataset 1_S5: Selected pathways used for Fig from IPA pathway activity z-score analysis from S4.
[truncated: 29 more rows]

[truncated: 2 more sheets: S6_IPA upstream regulators, S7_IPA upstream reg for Figure]
