# Supplementary material for: Human assembloids recapitulate periportal liver tissue in vitro
Source: Research Square preprint supplement (doi:10.21203/rs.3.rs-5314788/v1), 2025-09-17
Supplement: Supplementary file 5 [file a71615c496aabb34b351a8e1.docx]

**Supplementary Information**

**Human assembloids recapitulate periportal liver tissue *in vitro***

Lei Yuan, Sagarika Dawka, Yohan Kim, Anke Liebert, Fabian Rost, Robert Arnes-Benito, Franziska Baenke, Christina Götz, David Long Hin Tsang, Andrea Schuhmann, Anna Shevchenko, Roberta Rezende de Castro, Seunghee Kim, Aleksandra Sljukic, Anna M. Dowbaj, Andrej Schevchenko, Daniel Seehofer, Dongho Choi, Georg Damm, Daniel E. Stange, Meritxell Huch

**Supplementary Tables Legends……...……………………………………………..…Page 2**

**Supplementary Dataset Legends……...………………………………………………Page 3**

**Supplementary Tables Legends**

**Supplementary Table 1 - Summary of hepatocyte isolation and organoid generation from human liver tissues**

Summary of clinical data, isolation methods, and hepatocyte-like organoid formation outcomes from human liver tissues. Successful hepatocyte-organoid generation occurred only when perfusion was used and cell viability exceeded 50%.

**Supplementary Table 2 – Donor overview for hepatocyte organoid formation and expansion under EM1 and EM2 conditions**

Summary of patient information, isolation methods, viability, and hepatocyte organoid formation under EM1 (MM + Wnt S+ TRULI) and EM2 (MM + Wnt S+ TRULI- Nicotinamide) culture conditions. Long-term expansion (>10 passages) was achieved in 6 of 9 donors under EM2, but not in any of the 7 EM1 donors tested. n/a, not applicable.

**Supplementary Table 3 – Comparison with previous research of generation of hepatocytes organoids vs our work**

Summary of key parameters in recent studies generating hepatocyte organoids from tissue-derived human or mouse hepatocytes, in comparison to this study. Parameters include cellular origin, donor age, biobank size, culture method, long-term expansion potential, hepatocyte maturity, patient specificity, functional characteristics, and disease modelling capabilities. Only human cell-derived cultures are considered for maturity, precision, functionality, and disease modelling columns. n/a, not applicable.

**Supplementary Table 4 – Donor-specific gene signatures recapitulated in hepatocytes organoids, associated with metabolism, viral response, and liver disease susceptibility**

A curated list of donor-specific genes whose expression is recapitulated in human liver organoids. The genes are annotated based on their involvement in metabolism, lipid processing, antiviral responses (HBV/HCV), and susceptibility to liver diseases including cirrhosis and cancer. Each gene entry includes symbol, full name, functional annotation, and supporting references (PubMed ID or DOI). Genes are color-coded by functional category: metabolic enzymes, lipid metabolism-related genes, interferon-stimulated genes, and disease-associated markers. This dataset highlights how liver organoids retain individualized transcriptional features relevant to hepatic function and disease.

**Supplementary Dataset Legends**

**Supplementary Dataset 1: IPA analysis of differentially expressed genes (DEGs) from publicly available datasets.**

This dataset contains the results of Ingenuity Pathway Analysis (IPA) performed on DEGs derived from publicly available transcriptomic and mutational datasets related to hepatocellular carcinoma (HCC). The analyzed datasets include comparisons between HCC organoids and liver tissue, post-hepatectomy regenerating hepatocytes, and shared mutations in HCC patient samples, as referenced in the main text and supplementary figures.

- Supplementary Dataset 1-S1. DEG tables provided to IPA analysis. Filtered by |log2Foldchange| >1 and padj < 0.1
- Supplementary Dataset 1-S2. IPA pathway analysis output with -log (adj p-values) of overlap showed. Filtered for terms that -log (B-H p-values) >1.3 in at least 2 comparisons.
- Supplementary Dataset 1-S3. Subset of the IPA pathway analysis output and the adjp value from S2 used for Figure.
- Supplementary Dataset 1-S4. IPA pathway analysis output with activity z-score showed. Filtered for terms that -log (B-H p-values) >1.3 in at least 2 comparisons.
- Supplementary Dataset 1-S5. Subset of the IPA pathway analysis activity z-score from S4 used for Figure.
- Supplementary Dataset 1-S6. IPA upstream regulator analysis output. Filtered for the molecules belong to the two signalling pathway terms and has a upstream regulator adj-pvalue <0.1 identified as part of the shortlisted pathway.
- Supplementary Dataset 1-S7. Selected pathway members from S6 that used for Figure.

**Supplementary Dataset 2: RNAseq analysis.**

This dataset includes bulk RNA-seq analyses across multiple experimental conditions. All pathway analyses include KEGG and Reactome annotations, with p.adjust < 0.05 filtering applied where indicated.

- Supplementary Dataset 2-S1. Meta data for all the samples analysed by bulk RNA seq. Related to Fig 2,3 and Extended Data Fig. 2-4,6.
- Supplementary Dataset 2-S2. Raw counts for all the samples analysed by bulk RNA seq. Related to Fig 2,3 and Extended Data Fig. 2-4,6.
- Supplementary Dataset 2-S3. DEGs between MM+WtnS+TRULI and Primary (fresh isolated PHHs). Related to Extended Data Fig. 2.
- Supplementary Dataset 2-S4. Gene set renrichment analysis (GSEA) MM+WntS+TRULI vs Primary (fresh isolated PHHs). KEGG pathway analysis. Related to Extended Data Fig. 2. Not filtered.
- Supplementary Dataset 2-S5. Gene set renrichment analysis (GSEA) MM+WntS+TRULI vs Primary (fresh isolated PHHs). REACTOME pathway analysis. Related to Extended Data Fig. 2. Not filtered.
- Supplementary Dataset 2-S6. Gene lists from publicly available datasets used for Extended Data Fig. 2,3.
- Supplementary Dataset 2-S7. DEGs between h-HepOrg cultured in DM vs EM. Related to Fig. 2 and Extended Data Fig. 3.
- Supplementary Dataset 2-S8. Gene set renrichment analysis (GSEA) for h-HepOrg cultured in DM vs EM. KEGG pathway analysis. Related to Fig. 2 and Extended Data Fig. 3.
- Supplementary Dataset 2-S9. Gene set renrichment analysis (GSEA) between h-HepOrg in DM vs EM. REACTOME pathway analysis used for Fig. 2.
- Supplementary Dataset 2-S10. Gene set renrichment analysis (GSEA) between h-HepOrg in DM vs EM. Go-terms pathway analysis used for Extended Data Fig. 3.
- Supplementary Dataset 2-S11. Donor specific genes shown in Heatmap in Fig. 3 (ordered like in the heatmap).

**Supplementary Dataset 3: Single-cell RNA sequencing analyses**

This dataset contains scRNA-seq analyses of hepatocytes, cholangiocytes, and mesenchymal cells in liver assembloids, alongside comparative reference data from publicly available human liver tissue. All enrichment results are filtered for adjusted P < 0.05.

- Supplementary Dataset 3-S1. Top1000 Marker gene list of Cholangiocytes in assembloids related to Fig. 4 and Extended Data Fig. 8.
- Supplementary Dataset 3-S2. Top1000 Marker gene list of Hepatocytes in assembloids related to Fig. 4 and Extended Data Fig. 8.
- Supplementary Dataset 3-S3. Top1000 Marker gene list of Portal mesenchyme (MSC) in assembloids related to Fig. 4 and Extended Data Fig. 8.
- Supplementary Dataset 3-S4. Top1000 Marker gene list of Cholangiocytes in human Tissue related to Fig. 4 and Extended Data Fig. 8.
- Supplementary Dataset 3-S5. Top1000 Marker gene list of Hepatocytes in human Tissue related to Fig. 4 and Extended Data Fig. 8.
- Supplementary Dataset 3-S6. Top1000 Marker gene list of Portal mesenchyme (MSC) in human Tissue related to Fig. 4 and Extended Data Fig. 8.
- Supplementary Dataset 3-S7. GSEA for Cholangiocyte cells in assembloids. KEGG and REACTOME pathways. Related to Fig. 4 and Extended Data Fig. 8.
- Supplementary Dataset 3-S8. GSEA for Cholangiocyte cells in human Tissue. KEGG and REACTOME pathways. Related to Fig. 4 and Extended Data Fig. 8.
- Supplementary Dataset 3-S9. GSEA for Hepatocyte cells in assembloids. KEGG and REACTOME pathways. Related to Fig. 4 and Extended Data Fig. 8.
- Supplementary Dataset 3-S10. GSEA for Hepatocyte cells in human Tissue. KEGG and REACTOME pathways. Related to Fig. 4 and Extended Data Fig. 8.
- Supplementary Dataset 3-S11. GSEA for Mesenchymal cells in assembloids. KEGG and REACTOME pathways. Related to Fig. 4 and Extended Data Fig. 8.
- Supplementary Dataset 3-S12. GSEA for Mesenchymal cells in human Tissue. KEGG and REACTOME pathways. Related to Fig. 4 and Extended Data Fig. 8.

**Supplementary Dataset 4: Single-cell RNA sequencing analysis of fibrosis-like assembloids.**

This dataset contains gene set enrichment analyses (GSEA) of cholangiocytes, hepatocytes, and mesenchymal cells from fibrosis-like liver assembloids, compared with cell populations from publicly available fibrotic and healthy human liver tissue. All enrichment results are filtered for adjusted P < 0.05.

- Supplementary Dataset 4-S1. GSEA enriched in Cholangiocyte cells from fibrotic compared to healthy conditions. KEGG pathways. Related to Fig.5 and Extended Data Fig.10.
- Supplementary Dataset 4-S2. GSEA enriched in Cholangiocyte cells from fibrotic compared to healthy conditions. GO-terms pathways. Related to Fig.5 and Extended Data Fig.10.
- Supplementary Dataset 4-S3. GSEA enriched in Cholangiocyte cells from fibrotic compared to healthy conditions. REACTOME pathways. Related to Fig.5 and Extended Data Fig.10.
- Supplementary Dataset 4-S4. GSEA enriched in Hepatocyte cells from fibrotic compared to healthy conditions. KEGG pathways. Related to Fig.5 and Extended Data Fig.10.
- Supplementary Dataset 4-S5. GSEA enriched in Hepatocyte cells from fibrotic compared to healthy conditions. GO-terms pathways. Related to Fig.5 and Extended Data Fig.10.
- Supplementary Dataset 4-S6. GSEA enriched in Hepatocyte cells from fibrotic compared to healthy conditions. REACTOME pathways. Related to Fig.5 and Extended Data Fig.10.
- Supplementary Dataset 4-S7. GSEA enriched in Mesenchyme cells from fibrotic compared to healthy conditions. KEGG pathways. Related to Fig.5 and Extended Data Fig.10.
- Supplementary Dataset 4-S8. GSEA enriched in Mesenchyme cells from fibrotic compared to healthy conditions. GO-terms pathways. Related to Fig.5 and Extended Data Fig.10.
- Supplementary Dataset 4-S9. GSEA enriched in Mesenchyme cells from fibrotic compared to healthy conditions. REACTOME pathways. Related to Fig.5and Extended Data Fig.10.

**Supplementary Dataset 5: Antibodies, primers, and reagents used in this study.**

Comprehensive list of experimental materials used throughout this study.

- Supplementary Dataset 5-S1. Antibodies with details of target, vendor and catalog number, working concentration, application, and blocking/permeabilization solution.
- Supplementary Dataset 5-S2. Primers with sequence information.
- Supplementary Dataset 5-S3. Commercial kits with supplier and catalog number. All reagents were used according to manufacturers’ instructions unless otherwise specified.
