# Supplementary material for: Human assembloids recapitulate periportal liver tissue in vitro
Source: Research Square preprint supplement (doi:10.21203/rs.3.rs-5314788/v1), 2025-09-17
Supplement: Supplementary file 6 [file ab1861da9ceb21480f5fd356.xlsx]

## Sheet: Supplementary Table Info
Supplementary Table 4: Highlights donor-specific genes that are preserved in liver organoids and linked to key hepatic functions and pathologies.
Genes are grouped and color-coded by function: 🟩 Metabolic(green): Core regulators of hepatic detoxification and intermediary metabolism (e.g., GSTM3, GSTM1, PGM2, TREH, VNN1, LDHC). 🟧 Lipid metabolism (orange): Genes involved in lipid biosynthesis, transport, or storage (e.g., APOA4, ACSL3P1, ACSM1, TMPRSS2, FAR2, CD36, METRNL, PLCB1). 🟦 Viral response (blue): Interferon-stimulated and immune-re…

## Sheet: Table 4
Metabolism	HBV, or HCV Viral infection	susceptibility to liver disease		gene	gene name	gene function	reference			metabolism	lipid metabolism	virus	enzyme	DISEASE
Metabol				GSTM3	Glutathione S-Transferase Mu 3	Glutathione-S-transferases genes-promising predictors of hepatic dysfunction	PMID: 34239698
Lipid M				APOA4		ApoA4 deficiency increases the hepatic lipid burden, insulin resistance, and metabolic inflammatio	https://doi.org/10.3389/fimmu.2022.1038401
Lipid M				FAR2	Fatty Acyl-CoA Reductase 2	It encodes a reductase enzyme involved in the first step of wax biosynthesis wherein fatty acids are converted to fatty alcohols.	PMID: 15220348
Metabolism			pseudogene	LDHA4P4	lactate dehydrogenase A subunit,	The LDHAP4 gene encodes a pseudogene, not a functional enzyme. It's related to LDHA, which encodes a protein involved in energy metabolism in the liver, especially under hypoxic conditions. In the liver, LDHA is involved in converting pyruvate to lactate and vice versa, a process crucial for energy production when oxygen is limited.	this ref is for LDHA: not the pseudogene doi: 10.1016/j.jcmgh.2022.06.003
	HCB, and HCV	liver chirrosis		IFI27	IFN-alpha-inducible protein 27	The IFI27 gene, also known as IFN-alpha-inducible protein 27, is involved in the antiviral defense mechanism of the liver and is upregulated during type I interferon signaling. It's a key interferon-stimulated gene (ISG) that plays a role in restricting viral replication, particularly in the context of hepatitis B virus (HBV) and hepatitis C virus (HCV).	PMID: 38275754 and https://doi.org/10.3389/fmicb.2021.656353
		liver cancer		IFI44L	IFI44L	The IFI44L gene plays a role in liver health, particularly in the context of hepatocellular carcinoma (HCC). Studies indicate that IFI44L is a tumor suppressor in HCC, affecting cancer stemness, metastasis, and drug resistance. L	PMID: 29848298
Lipid M			pseudogene	ACSL3P1 Gene -	ACSL3 Pseudogene 1	The ACSL3P1 gene, also known as ACSL3 pseudogene 1, is expressed in the right lobe of the liver. It is a pseudogene, meaning it's a non-functional copy of a functional gene, ACSL3. ACSL3 is involved in lipogenesis, the synthesis of fatty acids.	J Biol Chem . 2009 Sep 8;284(44):30474–30483. doi: 10.1074/jbc.M109.036665
Metabolism				GSTM1	glutathione S-transferase mu-1	The GSTM1 gene, which encodes glutathione S-transferase mu-1, plays a role in the liver's detoxification processes. Specifically, it is involved in conjugating glutathione with a wide range of compounds, helping the liver eliminate them. Individuals with a GSTM1 null genotype (lacking the gene) may have reduced detoxification capacity and could be more susceptible to certain liver diseases	PMID: 36197156
			pseudogene	EIF3FP3
			pseudogene	WASH8P
Metabolism			pseudogene	GPX1P1	glutathione peroxidase 1	GPX1: This is the functional gene encoding glutathione peroxidase 1 (GPx1). GPx1 is a selenium-dependent enzyme that protects cells from oxidative damage by reducing hydrogen peroxide and other peroxides,
enzyme	covid			TMPRSS2		The TMPRSS2 gene encodes a protein that belongs to the serine proteasefamily.
Metabolism				PGM2	Phosphoglucomutase 2	The PGM2 gene is expressed in the liver and plays a role in glucose metabolism, specifically in the conversion of glucose-1-phosphate to glucose-6-phosphate, which is a step in glycogen synthesis and catabolism.	PMID 927504
Metabolism				TREH	Alpha,Alpha-Trehalose Glucohydrolase	participates in starch and sucrose metabolism
				RAI2	Retinoic Acid-Induced Protein 2
Lipid M				CD36		The CD36 gene plays a significant role in hepatic lipid metabolism, particularly in the context of non-alcoholic fatty liver disease (NAFLD). CD36 is a major transporter of long-chain fatty acids across the hepatocyte membrane, contributing to the accumulation of lipids in the liver. CD36 is involved in regulating DNL, the process of producing new fatty acids in the live	PMID: 26650570; https://doi.org/10.1016/j.molmet.2021.101428;PMID: 34974159
		liver cancer		Syk
		liver cancer		mctp1
		liver cancer		CLIC6	chloride intracellular channel	chloride intracellular channel protein, exhibits downregulation in hepatocellular carcinoma (HCC) compared to normal liver tissue.	PMID: 40134565
		Liver cholestasis in pregnancy		GABRP		It plays a role in regulating GABA receptor function and is involved in processes like autophagy. Studies have shown that GABRP expression is altered in various liver conditions, including intrahepatic cholestasis of pregnancy (ICP) and liver cancer.	https://doi.org/10.1016/j.heliyon.2023.e13221
enzyme				PTPRH		Receptor-type tyrosine-protein phosphatase H, which is a transmembrane protein tyrosine phosphatase
Lipid M				PLBD1	Phospholipase B Domain Containing 1	Predicted to enable phospholipase activity. Predicted to be involved in phospholipid catabolic process. L	https://www.ncbi.nlm.nih.gov/gene/79887
enzyme				WFDC2	WAP four-disulfide core domain 2	This gene encodes a protein that is a member of the WFDC domain family. The WFDC domain, or WAP Signature motif, contains eight cysteines forming four disulfide bonds at the core of the protein, and functions as a protease inhibitor in many family members.	https://www.ncbi.nlm.nih.gov/gene/10406
				EEIG1	EEIG1 estrogen-induced osteoclastogenesis regulator 1
Lipid M				Metrnl	Meteorin-like	Metrnl promotes PC biosynthesis, leading to increased TG secretion, thus alleviating TG accumulation in hepatocytes. Additionally, we observed that Metrnl positively regulates FAO in the liver and skeletal muscle through an AMPK-dependent pathway	https://doi.org/10.1016/j.celrep.2025.115246
				NCF2		The NCF2 gene, which codes for the neutrophil cytosolic factor 2 protein (p67-phox), plays a role in the immune system,
		LIVER FIBROSIS AND CANCER		PKN3	protein kinase N3,	Deletion of Protein Kinase D3 Promotes Liver Fibrosis in Mice	PMID: 32048304
			pseudogene	PKD1P2		(Polycystin 1, Transient Receptor Potential Channel Interacting Pseudogene 2)
			pseudogene	KRT8P3 Gene -	Keratin 8 Pseudogene 3
				KRT8P36	The gene, also known as KRT8 pseudogene 36
			pseudogene	FAM153CP gene (Pseudogene)
enzyme				FKBP7 (FKBP Prolyl Isomerase 7)		Members of this family exhibit PPIase activity and function as molecular chaperones
				MIF-AS1		Long non-coding RNA
enzyme				GATD3	(Glutamine Amidotransferase Class 1 Domain Containing 3) is
				TAPBP		is a member of the variable-constant Ig superfamily that links major histocompatibility complex (MHC) class I molecules to the transporter associated with antigen processing
Transcription F		liver cancer related		ID3		The ID3 gene plays a crucial role in the liver, particularly in liver development, cancer, and immune responses. It's involved in the development of hepatoblasts,	https://doi.org/10.1016/j.mod.2006.05.001
				AMN	(Amnion Associated Transmembrane Protein)
Metabolism				VNN1	Vanin-1	The VNN1 gene, encoding for Vanin-1, is primarily expressed in the liver, particularly by centrolobular hepatocytes. It plays a role in various metabolic processes, including gluconeogenesis, hepatic glucose output, and lipid metabolism. VNN1 is a key regulatory gene for PPAR-α in the liver and is involved in hepatic fat oxidation.
Lipid M				ACSM1	Acyl-CoA Synthetase Medium Chain Family Member 1	ACSM1 gene encodes a protein called Acyl-CoA Synthetase Medium Chain Family Member 1, which is involved in fatty acid metabolism, particularly the activation of medium-chain fatty acids to produce acyl-CoA. Catalyzes the activation of fatty acids by CoA to produce an acyl-CoA, the first step in fatty acid metabolism (PubMed:10434065). Capable of activating medium-chain fatty acids (e.g. butyric (…	PubMed:10434065; PubMed:10434065
		liver cancer		SNHG5		The long non-coding RNA (lncRNA) plays a role in liver fibrosis and hepatocellular carcinoma (HCC)
				RGPD1	(RANBP2 Like And GRIP Domain Containing 1
	susceptibility to HBV infection	liver cancer		IL1RL1		The Il1rl1 gene, also known as ST2, plays a role in liver diseases, particularly in the context of inflammation and fibrosis. It is a receptor for IL-33, a cytokine involved in various inflammatory processes. Studies suggest that genetic variations in the Il1rl1 gene can influence susceptibility to liver cirrhosis and other liver conditions. Genetic variants in IL33 and IL1RL1 genes confer suscep…	https://doi.org/10.1016/j.meegid.2021.104983
	susceptibility to HCV infection			ERAP2		The ERAP gene is associated with HCV chronic infection in a Chinese Han population	https://doi.org/10.1016/j.humimm.2017.10.005
				FAM106A () is an RNA Gene,	Family With Sequence Similarity 106 Member A	and is affiliated with the lncRNA class.
				TBC1D3H	TBC1 Domain Family Member 3H)
				ATP6V0E2-AS1		The ATP6V0E2-AS1 gene is an antisense RNA gene related to ATP6V0E2, which encodes a protein involved in proton transport and is associated with diseases like osteopetrosis.
			pseudogene	POLRMTP1		gene (Pseudogene), RNA Polymerase Mitochondrial Pseudogene
Metabolism				LDHC	lactate dehydrogenase C (LDH-C)	The LDHC gene codes for , an enzyme found primarily in the liver and other tissues. LDH-C is involved in energy production by converting pyruvate to lactate, particularly during anaerobic metabolism.	https://www.sciencedirect.com/topics/medicine-and-dentistry/lactate-dehydrogenase-isoenzyme#:~:text=The%20LDH%2D1%20isoenzyme%20is%20found%20predominately%20in%20cardiac%20muscle,the%20liver%20and%20skeletal%20muscle.
				MMP17		The MMP17 gene, which encodes the matrix metallopeptidase 17 (MT4-MMP), plays a role in liver diseases, particularly in the context of extracellular matrix (ECM) remodeling. MMP17 is a membrane-type MMP and its expression can be dysregulated in various liver conditions, including fibrosis and hepatocellular carcinoma.	PMID: 30769840
			pseudogene	PNMA6B		PNMA6B gene (Pseudogene), PNMA Family Member 6B (Pseudogene),
		liver cancer		GPC3	Glypican-3 (GPC3)	Glypican-3 (GPC3) is overexpressed in hepatocellular carcinomas and hepatoblastomas and represents an important therapeutic target but the biologic importance of GPC3 in liver cancer is unclear
		NAFLD		ADGR1		GPR56/ADGRG1 is a versatile adhesion G protein-coupled receptor Studies have shown that Adgrf1 (a mouse ortholog of ADGRG1) expression in the liver is correlated with fat content in both obese mice and NAFLD patients	doi: 10.7554/eLife.85131
enzyme				GUCY1A1		GUCY1A1 encodes the alpha-1 subunit of soluble guanylate cyclase (sGC), a key enzyme in the nitric oxide signaling pathway. Stellate cell specific
				PCDHAC2	protocadherin alpha subfamily C, 2	PCDHAC2 protocadherin alpha subfamily C, 2
				SCL16A5	SLC16A5 (Solute Carrier Family 16 Member 5)
enzyme				RENBP		The RENBP gene encodes renin-binding protein, which is expressed in the liver and involved in renin activity inhibition by forming a complex with renin. It also functions as a GlcNAc 2-epimerase, catalyzing the interconversion of N-acetylglucosamine and N-acetylmannosamine. RENBP is also involved in the biosynthesis of N-acetylneuraminic acid in the liver.	https://www.genecards.org/cgi-bin/carddisp.pl?gene=RENBP
enzyme				CPO		Mutations in the CPOX gene can cause hereditary coproporphyria (HCP), a liver-related condition, and a variant called harderoporphyria. The CPOX enzyme is essential for converting coproporphyrinogen III to protoporphyrinogen IX, a precursor of heme.
metabolism				CUBN	cubilin	Cubilin (CUBN) acts as a receptor for intrinsic factor-vitamin B12 complexes
				CDC42EP5		(CDC42 Effector Protein 5)
enzyme				NOS2		The NOS2 gene, which encodes inducible nitric oxide synthase (iNOS), is expressed in the liver and plays a role in liver physiology and disease.
lipid M		role in CCA		PLCB1	phospholipase C beta 1	The PLCB1 gene encodes (PLCB1), an enzyme involved in intracellular signaling and phospholipid hydrolysis, particularly in the liver. PLCB1 expression is observed in both normal and cancerous liver tissue, with increased levels seen in certain liver cancers. PLCB1 plays a role in the progression of cholangiocarcinoma (CCA), a type of liver cancer, by activating the PI3K/AKT signaling pathway and …	PubMed:9188725 and PMID: 34580062
				NPIPB15	Nuclear Pore Complex Interacting Protein Family Member B15)
				RSRP1	Arginine And Serine Rich Protein 1	Involved in spliceosomal complex assembly. Located in nucleus
				PRPF31-AS1		lncRNA class
			pseudogene	MTND2P28		MTND2P28 gene (Pseudogene),
		LIVER FIBROSIS		NPHP3		The NPHP3 gene is associated with various liver conditions, including hepatic fibrosis and renal-hepatic-pancreatic dysplasia (RHPD). Mutations in NPHP3 can cause juvenile or adolescent nephronophthisis (NPH) with or without extrarenal symptoms like hepatic fibrosis. NPHP3 is a component of the ciliary protein complex, and its dysfunction can lead to multisystemic diseases affecting the kidneys, …
				FAM153A	Family With Sequence Similarity 153 Member A
		liver cancer		TBC1D3		TBC1D3 is a protein coding gene that functions as a GTPase-activating protein for Rab5, which is involved in vesicle trafficking and Rab regulation. Studies have shown that TBC1D3 overexpression can promote the development of liver cancer.
				CDRT4	CMT1A Duplicated Region Transcript 4	Diseases associated with CDRT4 include Podoconiosis and Elephantiasis.	https://www.genecards.org/cgi-bin/carddisp.pl?gene=CDRT4
