# Supplementary material for: Human assembloids recapitulate periportal liver tissue in vitro
Source: Research Square preprint supplement (doi:10.21203/rs.3.rs-5314788/v1), 2025-09-17
Supplement: Supplementary file 7 [file abe86a462f0e8bac1bd340b3.xlsx]

## Sheet: Supplementary Table Info
Supplementary Dataset 3: scRNAseq analysis
Supplementary Dataset 3_S1 - Top1000 Marker gene list of Cholangiocytes in assembloids related to Fig. 4 and Extended Data Fig. 8
Supplementary Dataset 3_S2: Top1000 Marker gene list of Hepatocytes in assembloids related to Fig. 4 and Extended Data Fig. 8
Supplementary Dataset 3_S3: Top1000 Marker gene list of Portal mesenchyme (MSC) in assembloids related to Fig. 4 and Extended Data Fig. 8
Supplementary Dataset 3_S4 - Top1000 Marker gene list of Cholangiocytes in human Tissue related to Fig. 4 and Extended Data Fig. 8
Supplementary Dataset 3_S5: Top1000 Marker gene list of Hepatocytes in human Tissue related to Fig. 4 and Extended Data Fig. 8
Supplementary Dataset 3_S6: Top1000 Marker gene list of Portal mesenchyme (MSC) in human Tissue related to Fig. 4 and Extended Data Fig. 8
Supplementary Dataset 3_S7: GSEA for Cholangiocyte cells in assembloids. KEGG and REACTOME pathways. Related to Fig. 4 and Extended Data Fig. 8. Filtered for Adjusted P-value < 0.05.
Supplementary Dataset 3_S8: GSEA for Cholangiocyte cells in human Tissue. KEGG and REACTOME pathways. Related to Fig. 4 and Extended Data Fig. 8. Filtered for Adjusted P-value < 0.05.
Supplementary Dataset 3_S9: GSEA for Hepatocyte cells in assembloids. KEGG and REACTOME pathways. Related to Fig. 4 and Extended Data Fig. 8. Filtered for Adjusted P-value < 0.05.
Supplementary Dataset 3_S10: GSEA for Hepatocyte cells in human Tissue. KEGG and REACTOME pathways. Related to Fig. 4 and Extended Data Fig. 8. Filtered for Adjusted P-value < 0.05.
Supplementary Dataset 3_S11: GSEA for Mesenchymal cells in assembloids. KEGG and REACTOME pathways. Related to Fig. 4 and Extended Data Fig. 8. Filtered for Adjusted P-value < 0.05.
Supplementary Dataset 3_S12: GSEA for Mesenchymal cells in human Tissue. KEGG and REACTOME pathways. Related to Fig. 4 and Extended Data Fig. 8. Filtered for Adjusted P-value < 0.05.

## Sheet: S1_Top1000_markers_Chol_Assembl
Supplementary Dataset 3_S1 - Top1000 Marker gene list of Cholangiocytes in assembloids related to Fig. 4 and Extended Data Fig. 8
group	names	scores	logfoldchanges	pvals	pvals_adj
cholangiocyte	CYBA	74.2673	5.09997	0	0
cholangiocyte	RAB25	69.0445	3.74245	0	0
cholangiocyte	GSTP1	65.8588	3.17911	0	0
cholangiocyte	SPINT2	56.5828	2.2526	0	0
cholangiocyte	TSPAN1	47.1922	3.97923	1.56066e-290	7.21163e-288
cholangiocyte	OCIAD2	46.7011	1.82393	0	0
cholangiocyte	KRT7	45.4034	2.56225	0	0
cholangiocyte	ADGRG1	45.135	3.79682	1.01958e-278	4.10734e-276
cholangiocyte	GSN	44.5498	1.85036	0	0
cholangiocyte	PKM	43.3238	1.57422	0	0
cholangiocyte	EPCAM	42.8432	1.79781	0	0
cholangiocyte	CTSE	42.568	2.90901	3.11799e-290	1.39962e-287
cholangiocyte	MARCKSL1	41.6307	1.63742	8.65731e-300	4.25047e-297
cholangiocyte	SLC44A4	41.6	5.2671	8.87904e-236	2.08207e-233
cholangiocyte	GALNT7	41.0912	2.92965	1.74351e-249	5.07263e-247
cholangiocyte	LLGL2	39.6126	2.19484	7.63015e-249	2.17959e-246
cholangiocyte	UGT8	39.5885	5.85606	4.28056e-219	8.20144e-217
cholangiocyte	BACE2	39.5868	3.11986	5.31446e-239	1.30462e-236
cholangiocyte	KLK6	39.0987	4.71439	1.77114e-220	3.43535e-218
cholangiocyte	PLPP2	38.7942	1.82996	7.64666e-259	2.50285e-256
cholangiocyte	SMIM22	37.7258	4.19389	1.90678e-209	3.25624e-207
cholangiocyte	LAMB3	37.0512	2.06965	8.32313e-234	1.86807e-231
cholangiocyte	USH1C	37.0483	1.6133	2.25603e-241	5.81056e-239
cholangiocyte	SERPINB5	36.66	5.65278	2.57582e-197	3.929e-195
cholangiocyte	NUDT4	36.5887	2.1927	6.23279e-222	1.27173e-219
cholangiocyte	PKP3	36.5451	2.89321	2.80704e-213	5.1884e-211
cholangiocyte	HMGA1	36.2994	1.81407	5.038e-225	1.05536e-222
cholangiocyte	MMP7	36.0732	2.63716	1.15711e-237	2.79683e-235
cholangiocyte	KRT19	35.7577	2.0311	1.54376e-232	3.41605e-230
cholangiocyte	TSPO	35.1072	1.05204	6.70682e-227	1.44344e-224
cholangiocyte	SERPINB1	34.9329	1.50954	1.01702e-220	1.99731e-218
cholangiocyte	HMGN1	34.8663	1.06971	1.7113e-223	3.53765e-221
cholangiocyte	CKB	34.5405	2.43273	7.52009e-202	1.23071e-199
cholangiocyte	TMEM54	33.5448	2.11009	1.05784e-192	1.51088e-190
cholangiocyte	SYTL1	33.4191	3.49039	7.48953e-179	8.5889e-177
cholangiocyte	FERMT1	33.3986	2.53622	1.06584e-188	1.40718e-186
cholangiocyte	MACC1	33.3897	2.49049	2.96926e-187	3.85537e-185
cholangiocyte	SERPINB6	33.2936	1.41157	6.36839e-200	1.01064e-197
cholangiocyte	MECOM	33.2821	3.87052	3.96125e-176	4.44538e-174
cholangiocyte	EHF	33.1322	1.8942	1.37702e-195	2.04098e-193
cholangiocyte	LAMA3	32.9764	2.35056	2.34462e-187	3.06969e-185
cholangiocyte	EFHD2	32.9758	1.66817	8.48042e-191	1.18961e-188
cholangiocyte	DSG2	32.7552	1.62085	6.71032e-196	1.00406e-193
cholangiocyte	CDH1	32.7036	1.52365	5.46981e-195	8.03142e-193
cholangiocyte	BMP4	32.6929	2.09391	3.02903e-184	3.77691e-182
cholangiocyte	KIF5B	32.6796	1.14337	5.25242e-199	8.17038e-197
cholangiocyte	LYPD6B	32.6197	3.42832	3.96113e-174	4.32176e-172
cholangiocyte	CD44	32.4954	1.35593	2.0942e-196	3.16365e-194
cholangiocyte	INPP4B	32.3853	3.54017	1.07573e-170	1.12672e-168
cholangiocyte	CLSTN1	32.344	1.92657	2.13383e-181	2.57882e-179
cholangiocyte	PPDPF	32.0156	0.981846	4.3234e-193	6.24614e-191
cholangiocyte	DSP	31.9601	1.55875	1.18147e-189	1.60018e-187
cholangiocyte	FKBP1B	31.9425	2.01453	2.56481e-178	2.91997e-176
cholangiocyte	CAPN8	31.6425	2.71828	1.55986e-170	1.62298e-168
cholangiocyte	CST6	31.5718	4.21896	2.51636e-161	2.35324e-159
cholangiocyte	HSPG2	31.5687	1.87619	8.92087e-176	9.94013e-174
cholangiocyte	EZR	31.4957	1.3088	1.30423e-185	1.63926e-183
cholangiocyte	RAB10	31.3916	1.13422	2.00111e-182	2.45621e-180
cholangiocyte	PERP	31.3073	1.20078	7.26674e-187	9.35801e-185
cholangiocyte	ANXA3	31.2492	1.86901	1.04326e-180	1.23238e-178
cholangiocyte	CALM1	31.1028	0.816393	7.82994e-184	9.68632e-182
cholangiocyte	CCND1	31.0119	1.83308	5.34676e-174	5.79331e-172
cholangiocyte	AMIGO2	30.6905	3.059	5.54345e-158	4.92052e-156
cholangiocyte	MYO10	30.2082	2.17091	1.0457e-161	9.89695e-160
cholangiocyte	FOXC2	30.1438	2.75852	5.49378e-158	4.90413e-156
cholangiocyte	GALNT3	30.1423	2.95262	5.72154e-155	4.93908e-153
cholangiocyte	LAD1	30.1225	1.26382	8.12351e-172	8.62354e-170
cholangiocyte	ADD3	30.0268	1.50211	9.11128e-166	9.11766e-164
cholangiocyte	MAL2	30.0149	1.69896	9.86787e-166	9.81229e-164
cholangiocyte	SRP14	29.7583	0.648938	3.38521e-170	3.49902e-168
cholangiocyte	MYL12B	29.7262	0.769986	3.21378e-171	3.3887e-169
cholangiocyte	TM7SF3	29.6353	1.2157	3.79122e-166	3.81819e-164
cholangiocyte	IQGAP1	29.4806	1.52392	1.187e-162	1.15117e-160
cholangiocyte	CHD3	29.3878	2.13973	1.2335e-154	1.05899e-152
cholangiocyte	KLK11	29.3297	5.61023	1.90805e-142	1.40081e-140
cholangiocyte	VAMP8	29.279	1.04589	1.22299e-166	1.23964e-164
cholangiocyte	HDAC1	29.2521	1.23995	7.78041e-161	7.23302e-159
cholangiocyte	APP	29.2271	1.02118	3.51304e-163	3.42816e-161
cholangiocyte	CXADR	29.106	1.30367	1.30822e-161	1.23074e-159
cholangiocyte	EFNB2	29.0865	2.05889	6.08418e-153	5.05759e-151
cholangiocyte	SUMO2	29.0423	0.71122	4.56973e-162	4.37775e-160
cholangiocyte	LAMC2	28.9708	2.46424	5.6647e-148	4.42776e-146
cholangiocyte	RNASET2	28.9091	1.58335	3.47834e-153	2.90682e-151
cholangiocyte	LDHB	28.7957	1.13922	8.11966e-161	7.504e-159
cholangiocyte	KLK10	28.5905	4.45351	2.37712e-138	1.65987e-136
cholangiocyte	SPINT1	28.5823	1.3801	5.11765e-156	4.51705e-154
cholangiocyte	SYNGR2	28.5589	1.43829	1.03886e-151	8.45672e-150
cholangiocyte	ANXA1	28.5521	2.00355	1.19002e-152	9.84025e-151
cholangiocyte	ARPC3	28.5261	0.671926	4.04544e-158	3.63188e-156
cholangiocyte	BCL2L15	28.4341	3.50977	3.99659e-139	2.8284e-137
cholangiocyte	VSIG2	28.4138	4.10213	1.71407e-137	1.18113e-135
cholangiocyte	ATP6V1G1	28.3816	0.769816	1.05693e-155	9.2252e-154
cholangiocyte	RBP1	28.3726	1.88634	2.0041e-154	1.70197e-152
cholangiocyte	PTMA	28.3297	0.72131	4.57505e-154	3.86444e-152
cholangiocyte	PMEPA1	28.3153	2.05722	5.43443e-149	4.31214e-147
cholangiocyte	C12orf75	28.2709	1.17374	7.36776e-156	6.46675e-154
cholangiocyte	RAB11A	28.0635	0.923917	3.33979e-153	2.80596e-151
cholangiocyte	ITGB4	27.9468	1.62716	1.1298e-147	8.70109e-146
cholangiocyte	CAPG	27.9359	1.71215	2.50399e-148	1.97689e-146
cholangiocyte	ICA1	27.7987	2.49086	1.00161e-138	7.05666e-137
cholangiocyte	PLK2	27.6195	1.59012	6.98835e-143	5.15465e-141
cholangiocyte	WNT7B	27.5725	3.64642	3.3736e-132	2.19928e-130
cholangiocyte	GDE1	27.557	1.22982	2.08582e-145	1.56796e-143
cholangiocyte	HS3ST1	27.5075	5.84784	5.99688e-129	3.70933e-127
cholangiocyte	SYNE2	27.409	1.55832	1.11418e-141	8.10411e-140
cholangiocyte	SYT13	27.3701	1.516	9.73571e-144	7.21499e-142
cholangiocyte	MLPH	27.3156	1.90419	6.16023e-138	4.28245e-136
cholangiocyte	UBE2E3	27.3086	0.966661	1.69608e-145	1.28111e-143
cholangiocyte	HSP90AA1	27.2839	0.556965	6.95565e-146	5.27924e-144
cholangiocyte	TMEM125	27.2122	3.76019	1.99712e-129	1.24511e-127
cholangiocyte	GIPC1	27.0215	1.19057	3.94884e-140	2.84588e-138
cholangiocyte	CLTB	26.8191	1.23435	1.68741e-137	1.16788e-135
cholangiocyte	KCNMB4	26.7821	3.79844	4.42966e-126	2.63615e-124
cholangiocyte	POF1B	26.7311	4.7448	3.35106e-124	1.90755e-122
cholangiocyte	RAB13	26.692	1.13226	1.67562e-138	1.17526e-136
cholangiocyte	CEACAM6	26.6314	3.43418	5.61143e-126	3.31433e-124
cholangiocyte	YWHAZ	26.619	0.936739	5.27176e-137	3.61679e-135
cholangiocyte	TMC6	26.5929	2.18041	3.52173e-130	2.2132e-128
cholangiocyte	CTSD	26.4247	1.06411	3.70435e-134	2.48714e-132
cholangiocyte	ZDHHC3	26.4043	1.25115	5.00661e-134	3.34719e-132
cholangiocyte	ST6GALNAC1	26.2726	4.3172	1.98596e-121	1.07221e-119
cholangiocyte	DBN1	26.267	1.72131	5.67821e-130	3.55419e-128
cholangiocyte	S100A4	26.2616	1.75166	8.78655e-132	5.6576e-130
cholangiocyte	PRSS22	26.2357	3.57938	9.31241e-122	5.13359e-120
cholangiocyte	ABLIM1	26.1577	1.4735	2.05145e-130	1.29439e-128
cholangiocyte	ADAM28	26.0806	4.30728	5.63245e-120	2.95958e-118
cholangiocyte	ROBO2	26.0679	5.25241	8.17133e-119	4.12797e-117
cholangiocyte	ENSA	26.037	0.949514	4.49812e-132	2.90823e-130
cholangiocyte	SH3BGRL3	26.0202	0.908548	1.77522e-134	1.19702e-132
cholangiocyte	SYT8	25.9705	2.73828	2.58676e-121	1.38705e-119
cholangiocyte	PPP1R9A	25.9622	3.02214	1.00657e-121	5.52945e-120
cholangiocyte	CAPS	25.9042	3.36498	1.88493e-119	9.67781e-118
cholangiocyte	STMN1	25.8432	1.94721	5.44665e-126	3.22914e-124
cholangiocyte	CD74	25.8419	2.63564	1.56048e-121	8.51274e-120
cholangiocyte	CDKN1C	25.8112	3.26629	1.17632e-119	6.11962e-118
cholangiocyte	CHMP3	25.783	0.962595	1.0147e-130	6.45421e-129
cholangiocyte	ERN2	25.7555	3.21916	1.79255e-119	9.23371e-118
cholangiocyte	PCBD1	25.7302	1.03016	9.40151e-131	6.00436e-129
cholangiocyte	KRT8	25.7043	1.15003	3.66914e-132	2.38206e-130
cholangiocyte	IFI27	25.6795	3.14013	2.30684e-119	1.18054e-117
cholangiocyte	SMIM14	25.6369	1.23868	2.55003e-126	1.535e-124
cholangiocyte	RAB11FIP1	25.6318	1.46011	4.31415e-126	2.57717e-124
cholangiocyte	YWHAB	25.5851	0.707732	1.75979e-130	1.11484e-128
cholangiocyte	TSPAN8	25.5037	1.64703	1.9707e-126	1.19083e-124
cholangiocyte	TSPAN13	25.4351	1.27118	9.11683e-126	5.3247e-124
cholangiocyte	S100A6	25.4143	1.18589	3.25333e-129	2.02028e-127
cholangiocyte	MUC1	25.3806	3.75079	1.08176e-114	5.1346e-113
cholangiocyte	TSPAN3	25.3304	0.994686	3.22137e-126	1.93172e-124
cholangiocyte	NPDC1	25.2844	1.3431	4.29663e-124	2.41951e-122
cholangiocyte	TCN2	25.2818	1.9447	1.61048e-120	8.57702e-119
cholangiocyte	HIF1A	25.251	1.06109	8.23494e-125	4.73916e-123
cholangiocyte	SLCO2A1	25.2312	5.13416	7.92155e-113	3.69304e-111
cholangiocyte	AP1M2	25.2055	1.21511	8.07209e-126	4.73211e-124
cholangiocyte	KRT17	25.1579	3.42694	3.90448e-116	1.911e-114
cholangiocyte	FOXQ1	25.1245	2.0748	4.29616e-119	2.19146e-117
cholangiocyte	JUP	25.0663	1.36932	1.55347e-121	8.50402e-120
cholangiocyte	PROM2	25.0659	5.05358	8.98456e-112	4.09149e-110
cholangiocyte	ST14	25.0559	1.38324	2.43833e-121	1.31194e-119
cholangiocyte	MSX2	25.0483	5.27238	1.67823e-111	7.55492e-110
cholangiocyte	SFT2D1	25.0238	1.3172	1.56742e-121	8.52102e-120
cholangiocyte	RABGAP1L	25.0142	1.68388	1.45472e-118	7.32535e-117
cholangiocyte	FOLR1	25.0058	1.82291	1.99741e-118	1.0026e-116
cholangiocyte	XRCC5	25.0014	0.710268	3.50667e-124	1.98893e-122
cholangiocyte	ITGA6	24.8692	1.29007	4.43759e-123	2.4811e-121
cholangiocyte	QSOX1	24.8568	1.18985	4.25495e-121	2.27379e-119
cholangiocyte	CDK2AP1	24.8143	0.995234	1.35359e-123	7.5951e-122
cholangiocyte	CSTB	24.7813	0.771641	4.71588e-123	2.62735e-121
cholangiocyte	ONECUT3	24.71	2.25556	4.25017e-115	2.04203e-113
cholangiocyte	RABL6	24.6782	1.51877	1.41662e-117	7.02099e-116
cholangiocyte	YWHAE	24.5659	0.646705	2.87179e-120	1.52428e-118
cholangiocyte	PRSS8	24.5283	2.07014	1.48e-113	6.941e-112
cholangiocyte	IL20RA	24.5243	4.81707	4.64048e-108	1.96514e-106
cholangiocyte	CDK6	24.4479	1.33244	1.4997e-115	7.24976e-114
cholangiocyte	MYOF	24.4264	1.45383	2.30016e-117	1.13285e-115
cholangiocyte	CCDC186	24.3952	1.32208	6.80423e-116	3.31992e-114
cholangiocyte	BAX	24.3788	0.760778	4.33047e-119	2.20181e-117
cholangiocyte	ADGRF1	24.3754	5.6123	1.68905e-106	7.02027e-105
cholangiocyte	FAM3D	24.3072	5.10393	2.57598e-106	1.05946e-104
cholangiocyte	NQO1	24.3049	1.42511	3.64044e-117	1.78734e-115
cholangiocyte	SGPP2	24.2904	2.16512	7.61742e-111	3.40961e-109
cholangiocyte	PTBP3	24.2136	1.11846	7.15857e-115	3.41849e-113
cholangiocyte	S100A11	24.1873	0.9048	8.43545e-118	4.20728e-116
cholangiocyte	CXCL16	24.1304	2.2476	3.89496e-109	1.69043e-107
cholangiocyte	CASK	24.0611	1.21668	8.91326e-114	4.1927e-112
cholangiocyte	WNT7A	24.0522	3.49415	5.08135e-106	2.07359e-104
cholangiocyte	C19orf33	24.0476	1.80388	4.44305e-112	2.04706e-110
cholangiocyte	HPGD	24.0371	1.45631	1.03783e-115	5.04808e-114
cholangiocyte	PCDH7	24.0158	2.97842	2.53058e-107	1.05459e-105
cholangiocyte	TRAK1	24.0138	1.86044	3.78073e-110	1.66851e-108
cholangiocyte	GPRC5A	23.9937	2.06993	4.67442e-110	2.05714e-108
cholangiocyte	ITGB6	23.9759	2.24087	8.05614e-108	3.3933e-106
cholangiocyte	ITGA3	23.9034	1.38451	1.19022e-112	5.5324e-111
cholangiocyte	FHL2	23.8968	1.3289	1.46965e-111	6.65409e-110
cholangiocyte	RASSF6	23.894	2.15374	2.58901e-108	1.10833e-106
cholangiocyte	LGALS3BP	23.8796	1.17888	1.55628e-111	7.02609e-110
cholangiocyte	ANKRD22	23.8383	3.94267	8.92802e-104	3.54212e-102
cholangiocyte	CDCP1	23.8302	1.76242	1.74522e-109	7.63766e-108
cholangiocyte	SPECC1	23.7981	1.3699	2.95175e-109	1.28462e-107
cholangiocyte	LIPH	23.789	1.99191	3.70627e-108	1.57376e-106
cholangiocyte	RAC2	23.775	2.55991	3.17583e-106	1.30275e-104
cholangiocyte	S100A16	23.7608	0.913697	1.02036e-114	4.85782e-113
cholangiocyte	SET	23.6261	0.645546	6.41431e-112	2.93806e-110
cholangiocyte	TMEM106B	23.6095	1.11367	1.85797e-109	8.1085e-108
cholangiocyte	TRAF5	23.5667	2.8671	2.05977e-103	8.11052e-102
cholangiocyte	AHNAK2	23.555	1.76665	2.57887e-108	1.10701e-106
cholangiocyte	TMEM50A	23.5169	0.814123	4.84979e-111	2.177e-109
cholangiocyte	CMTM7	23.5156	1.60041	2.36681e-106	9.7855e-105
cholangiocyte	GALNT5	23.4884	1.56785	3.15739e-108	1.34798e-106
cholangiocyte	SLC7A7	23.409	1.83419	2.32293e-106	9.62945e-105
cholangiocyte	TIMP2	23.354	1.47951	1.62179e-110	7.21813e-109
cholangiocyte	MISP	23.2622	1.20941	1.47442e-108	6.34648e-107
cholangiocyte	TACSTD2	23.2545	1.75896	6.49797e-106	2.64481e-104
cholangiocyte	LGALS3	23.2	0.684738	1.62081e-109	7.11302e-108
cholangiocyte	CDH3	23.1995	3.37206	3.00177e-100	1.14191e-98
cholangiocyte	LPCAT2	23.1971	2.67012	1.14181e-100	4.37538e-99
cholangiocyte	CALM2	23.1672	0.687516	1.3784e-107	5.7904e-106
cholangiocyte	IFI6	23.0935	1.40068	2.58259e-105	1.03772e-103
cholangiocyte	DSC2	22.9035	1.67488	3.37326e-104	1.34853e-102
cholangiocyte	CHMP2A	22.8463	0.715059	9.54804e-106	3.85628e-104
cholangiocyte	SFN	22.7903	1.52169	4.27339e-103	1.67429e-101
cholangiocyte	NBEAL2	22.708	2.7269	3.4673e-97	1.28478e-95
cholangiocyte	B3GALT5	22.6825	5.50274	7.86146e-95	2.78179e-93
cholangiocyte	AQP5	22.6543	4.78694	4.0871e-95	1.45606e-93
cholangiocyte	TMEM92	22.5598	1.64173	2.65247e-100	1.01394e-98
cholangiocyte	HSPA8	22.5094	0.62866	6.79866e-103	2.65706e-101
cholangiocyte	TTC9	22.4331	1.90013	1.95049e-98	7.29623e-97
cholangiocyte	KLF5	22.4134	1.18517	4.97543e-101	1.92534e-99
cholangiocyte	CLIC1	22.4059	0.679576	4.09904e-103	1.61e-101
cholangiocyte	SUMO1	22.3977	0.717734	3.80224e-102	1.48231e-100
cholangiocyte	MFSD10	22.3896	1.09175	9.86015e-101	3.7876e-99
cholangiocyte	GAS6	22.3847	1.78838	4.34169e-97	1.60123e-95
cholangiocyte	DUSP4	22.3383	1.39097	3.83157e-100	1.45405e-98
cholangiocyte	LAMP1	22.2684	0.73501	3.40009e-101	1.31898e-99
cholangiocyte	HSP90AB1	22.2655	0.473053	2.89225e-101	1.12476e-99
cholangiocyte	COL17A1	22.2435	1.80881	3.75435e-97	1.38787e-95
cholangiocyte	C6orf132	22.2398	1.35913	9.23605e-99	3.4798e-97
cholangiocyte	KCNN4	22.2213	3.85367	1.62565e-92	5.45738e-91
cholangiocyte	FUT8	22.126	1.8586	9.14672e-96	3.28842e-94
cholangiocyte	KDELR1	22.1125	0.548209	8.38485e-100	3.17432e-98
cholangiocyte	PDZD8	22.0317	1.10496	4.91716e-97	1.80921e-95
cholangiocyte	SRI	22.0216	1.17647	1.25627e-97	4.67709e-96
cholangiocyte	DAB2	21.9769	1.37017	6.76192e-96	2.44222e-94
cholangiocyte	ADAM9	21.9169	1.06186	1.47622e-96	5.38117e-95
cholangiocyte	GALNT1	21.8889	0.90379	6.45106e-97	2.36253e-95
cholangiocyte	PAFAH1B3	21.8517	1.15622	3.07447e-96	1.11812e-94
cholangiocyte	OTUB2	21.8235	2.56408	1.29819e-91	4.32115e-90
cholangiocyte	SDCBP	21.7837	0.910856	7.65329e-96	2.75782e-94
cholangiocyte	FBLIM1	21.7831	1.25108	3.76621e-95	1.34479e-93
cholangiocyte	CDS1	21.7759	1.94179	8.85969e-93	2.99988e-91
cholangiocyte	UFC1	21.7576	0.638763	5.58123e-97	2.04876e-95
cholangiocyte	CTNNBIP1	21.7422	1.34325	6.13187e-94	2.13137e-92
cholangiocyte	EPHA4	21.7229	5.06108	2.43612e-88	7.70098e-87
cholangiocyte	DYNLT1	21.6639	0.683841	5.64394e-96	2.04785e-94
cholangiocyte	ARMC10	21.6284	1.12618	1.71564e-93	5.91104e-92
cholangiocyte	PAPSS1	21.5849	1.2137	4.20292e-93	1.42927e-91
cholangiocyte	CHMP5	21.5396	0.813922	1.06829e-94	3.75477e-93
cholangiocyte	TM4SF1	21.5091	1.10115	1.05599e-94	3.71986e-93
cholangiocyte	TINAGL1	21.504	1.43265	1.45898e-92	4.9189e-91
cholangiocyte	CLTA	21.453	0.501062	7.11385e-95	2.52293e-93
cholangiocyte	APOBEC3C	21.4477	2.89097	1.25781e-88	4.00031e-87
cholangiocyte	ATP6V1F	21.4212	0.704539	8.07236e-94	2.79967e-92
cholangiocyte	DHX32	21.4019	1.24374	6.61415e-92	2.20626e-90
cholangiocyte	BIK	21.3935	2.45274	1.06738e-88	3.40154e-87
cholangiocyte	DDR1	21.3819	1.16175	1.04894e-92	3.54408e-91
cholangiocyte	PDGFB	21.3689	2.77163	1.87335e-87	5.85133e-86
cholangiocyte	MBOAT2	21.3625	3.0454	2.92846e-87	9.12879e-86
cholangiocyte	ARPC5	21.3263	0.690122	2.79957e-93	9.58259e-92
cholangiocyte	MSLN	21.2929	3.67422	3.73846e-86	1.14717e-84
cholangiocyte	TUSC3	21.2723	1.24805	2.14342e-91	7.10448e-90
cholangiocyte	RALA	21.2493	0.922858	1.59789e-91	5.30748e-90
cholangiocyte	CAPN2	21.2479	0.727147	2.12816e-93	7.31629e-92
cholangiocyte	SLCO1B3	21.2337	1.65491	2.6256e-90	8.52288e-89
cholangiocyte	MAP9	21.2305	1.79741	2.57905e-89	8.25243e-88
cholangiocyte	SEMA3C	21.22	1.88226	2.51349e-89	8.05907e-88
cholangiocyte	NTN4	21.1861	2.03267	3.45955e-88	1.08924e-86
cholangiocyte	TANC2	21.1779	2.31747	6.71487e-87	2.08081e-85
cholangiocyte	RCN2	21.077	0.957583	1.63759e-90	5.3489e-89
cholangiocyte	EPB41L3	21.0634	5.0997	3.08171e-84	9.13522e-83
cholangiocyte	LINC00511	21.0475	1.08723	1.60702e-90	5.25998e-89
cholangiocyte	BAG1	21.0144	0.819892	5.14422e-90	1.66298e-88
cholangiocyte	SLC2A1	21.0119	1.88937	3.13709e-87	9.75978e-86
cholangiocyte	DCTPP1	20.9858	1.04152	2.60308e-89	8.31239e-88
cholangiocyte	TRIM29	20.9655	3.84553	6.00251e-84	1.76602e-82
cholangiocyte	KLK7	20.8852	4.77088	9.15517e-83	2.62956e-81
cholangiocyte	CCNI	20.8284	0.650278	2.56833e-90	8.35424e-89
cholangiocyte	EPS8L1	20.8125	2.08815	3.72786e-85	1.11985e-83
cholangiocyte	EMC10	20.7557	0.855305	2.10389e-88	6.66415e-87
cholangiocyte	CLDN4	20.6958	1.11525	2.91463e-88	9.19512e-87
cholangiocyte	B4GALT4	20.6706	1.57731	4.5153e-85	1.35123e-83
cholangiocyte	EEF1A2	20.6622	4.16565	1.31769e-81	3.70345e-80
cholangiocyte	S100A10	20.5687	0.765957	1.86197e-87	5.82736e-86
cholangiocyte	ITPR3	20.5584	1.46757	3.05351e-85	9.22572e-84
cholangiocyte	MYO5C	20.5059	1.58461	4.43198e-84	1.30885e-82
cholangiocyte	MBOAT7	20.4962	1.13848	3.42586e-85	1.03111e-83
cholangiocyte	FUT3	20.48	4.49817	2.90526e-80	7.92439e-79
cholangiocyte	FKBP1A	20.4795	0.741062	5.86943e-87	1.82242e-85
cholangiocyte	DHRS9	20.4643	3.46949	4.70721e-81	1.29974e-79
cholangiocyte	SFTA2	20.4105	3.24148	1.89935e-80	5.21691e-79
cholangiocyte	SLC6A8	20.3961	1.8049	6.04434e-83	1.74564e-81
cholangiocyte	SH3YL1	20.3939	1.05276	3.20252e-85	9.65734e-84
cholangiocyte	NPC2	20.3879	0.648054	2.55081e-86	7.85798e-85
cholangiocyte	FANK1	20.368	2.63821	3.84111e-81	1.06433e-79
cholangiocyte	OLA1	20.3425	0.728815	1.15286e-85	3.5034e-84
cholangiocyte	PLA2R1	20.3316	2.75391	1.05517e-80	2.90329e-79
cholangiocyte	RAC1	20.3288	0.54015	3.02721e-86	9.30734e-85
cholangiocyte	NHS	20.2915	2.61862	2.27924e-80	6.24942e-79
cholangiocyte	GRN	20.2753	0.852799	3.43291e-84	1.01572e-82
cholangiocyte	TSPAN14	20.2632	1.20302	5.26092e-83	1.52499e-81
cholangiocyte	CLDN2	20.2273	1.12437	1.0508e-84	3.13266e-83
cholangiocyte	MYH14	20.2099	1.28673	6.24762e-83	1.80103e-81
cholangiocyte	UNC13D	20.2079	5.31441	3.46784e-78	8.93169e-77
cholangiocyte	SMCHD1	20.1653	1.30624	2.10386e-81	5.87101e-80
cholangiocyte	MAPK13	20.0762	1.21542	3.32276e-82	9.44013e-81
cholangiocyte	UBC	20.0738	0.657245	1.77437e-83	5.17201e-82
cholangiocyte	TMC5	20.0704	3.12328	2.03186e-78	5.26775e-77
cholangiocyte	VILL	20.0499	2.44807	2.03205e-79	5.4203e-78
cholangiocyte	STEAP2	20.0397	2.25656	4.00754e-79	1.05819e-77
cholangiocyte	AGR2	20.0186	1.39924	3.69345e-82	1.04743e-80
cholangiocyte	ANXA2	20.003	0.695953	1.98963e-83	5.78872e-82
cholangiocyte	NCF2	19.9384	2.01401	2.8456e-79	7.57751e-78
cholangiocyte	CST3	19.9313	0.592123	4.34256e-82	1.22875e-80
cholangiocyte	FIBP	19.929	0.818109	3.18101e-82	9.05377e-81
cholangiocyte	SORT1	19.9259	1.40769	3.08357e-80	8.39618e-79
cholangiocyte	LXN	19.8675	2.72975	6.90055e-78	1.77148e-76
cholangiocyte	BRK1	19.8671	0.546483	4.35324e-82	1.22875e-80
cholangiocyte	FAM83E	19.8499	3.29393	6.90294e-77	1.73246e-75
cholangiocyte	HLA-B	19.8343	1.13836	2.94824e-79	7.83753e-78
cholangiocyte	TMEM9B	19.8337	0.866303	3.11938e-81	8.6741e-80
cholangiocyte	CMTM6	19.8322	0.743306	3.26666e-81	9.06757e-80
cholangiocyte	GAPDH	19.8048	0.466352	2.45525e-81	6.83943e-80
cholangiocyte	CXXC5	19.7324	0.808401	2.49051e-80	6.81679e-79
cholangiocyte	CD9	19.7105	1.13779	2.02581e-81	5.66325e-80
cholangiocyte	GPRIN2	19.6851	2.62901	2.39683e-76	5.9489e-75
cholangiocyte	ATP6V0E1	19.6759	0.519671	5.50106e-81	1.51627e-79
cholangiocyte	ATP6V1D	19.6596	0.750964	4.68655e-80	1.26296e-78
cholangiocyte	DYNLL1	19.5883	0.487311	1.09048e-79	2.92364e-78
cholangiocyte	ENC1	19.5585	1.21705	5.2912e-78	1.36056e-76
cholangiocyte	CTNNA1	19.5464	0.620652	3.65593e-79	9.66976e-78
cholangiocyte	TMEM165	19.5458	0.822547	1.78123e-79	4.76744e-78
cholangiocyte	CDH17	19.5458	3.97513	2.74948e-74	6.55495e-73
cholangiocyte	SOX4	19.5395	1.01203	3.25112e-79	8.61355e-78
cholangiocyte	TMEM134	19.5231	0.850776	6.7664e-79	1.77474e-77
cholangiocyte	CSNK1A1	19.5082	0.740376	9.68722e-79	2.52817e-77
cholangiocyte	TPRG1	19.4907	4.20134	9.26222e-74	2.17842e-72
cholangiocyte	PLEKHG3	19.4907	2.35702	2.08809e-75	5.10998e-74
cholangiocyte	MYRF	19.482	1.54284	4.11355e-77	1.0357e-75
cholangiocyte	METTL9	19.4552	0.843861	4.94631e-79	1.30388e-77
cholangiocyte	LRPAP1	19.4144	0.67861	1.86522e-78	4.84371e-77
cholangiocyte	KDM5B	19.4108	0.897974	1.30572e-77	3.33023e-76
cholangiocyte	JUN	19.406	0.933651	1.3122e-78	3.41889e-77
cholangiocyte	CYTIP	19.3678	4.42775	4.31308e-73	1.00241e-71
cholangiocyte	CFAP36	19.3207	0.974226	5.66253e-77	1.42343e-75
cholangiocyte	CAPNS1	19.3164	0.70534	2.00239e-77	5.08232e-76
cholangiocyte	TNFSF9	19.2643	1.87241	1.13231e-74	2.74532e-73
cholangiocyte	ZDHHC12	19.2638	0.914477	7.96451e-77	1.9957e-75
cholangiocyte	NET1	19.2204	1.27142	1.30831e-75	3.21672e-74
cholangiocyte	SYPL1	19.2107	0.743887	9.35181e-77	2.33959e-75
cholangiocyte	PPIC	19.1979	0.751745	3.26206e-77	8.22637e-76
cholangiocyte	PLEKHA5	19.1962	0.907208	3.06356e-76	7.59173e-75
cholangiocyte	SVIP	19.186	1.42061	5.01255e-75	1.21719e-73
cholangiocyte	MGAT4B	19.1858	0.691339	1.01466e-76	2.53439e-75
cholangiocyte	RNF43	19.1489	1.36432	3.88521e-75	9.46365e-74
cholangiocyte	IFT57	19.0977	1.04054	1.46104e-75	3.58663e-74
cholangiocyte	EHD4	19.0913	1.31072	1.49621e-74	3.60537e-73
cholangiocyte	VANGL1	19.0862	1.80866	1.58821e-73	3.71315e-72
cholangiocyte	GNPDA1	19.0814	1.0661	4.63839e-75	1.12808e-73
cholangiocyte	HEBP2	19.0724	0.659247	5.12028e-76	1.26485e-74
cholangiocyte	PRDX5	19.06	0.518841	7.74491e-76	1.91021e-74
cholangiocyte	TCF7L2	19.026	1.19754	2.66623e-74	6.36612e-73
cholangiocyte	ATXN7L3B	18.9883	0.89112	1.54483e-74	3.71682e-73
cholangiocyte	CERS6	18.9677	1.40078	2.89114e-73	6.7293e-72
cholangiocyte	NPNT	18.9162	3.78452	2.47459e-70	5.43753e-69
cholangiocyte	SLK	18.858	0.91328	1.01242e-73	2.37406e-72
cholangiocyte	TMSB4X	18.857	0.800237	1.21886e-74	2.95063e-73
cholangiocyte	PDLIM7	18.8438	1.24113	4.6353e-73	1.0757e-71
cholangiocyte	TAX1BP3	18.8142	0.815913	5.55124e-74	1.31547e-72
cholangiocyte	CD63	18.8079	0.499693	2.04177e-74	4.89745e-73
cholangiocyte	CCT8	18.799	0.645978	7.62169e-74	1.79796e-72
cholangiocyte	TMEM167A	18.7944	0.675471	7.25042e-74	1.71295e-72
cholangiocyte	SLC16A3	18.7702	1.48281	3.52154e-72	8.06515e-71
cholangiocyte	DYNC1LI2	18.7616	0.775224	1.25705e-73	2.94329e-72
cholangiocyte	CDC42SE1	18.7611	1.1737	1.90896e-72	4.39116e-71
cholangiocyte	LRRN1	18.7456	5.5275	9.06452e-69	1.93759e-67
cholangiocyte	CFL1	18.738	0.431472	2.8088e-74	6.68621e-73
cholangiocyte	GUK1	18.7235	0.526787	5.4891e-74	1.30271e-72
cholangiocyte	MMP1	18.6567	1.92655	3.53476e-71	7.95624e-70
cholangiocyte	DLG3	18.6083	1.46661	6.9181e-71	1.54609e-69
cholangiocyte	TCN1	18.5973	1.98242	4.07805e-71	9.166e-70
cholangiocyte	RASEF	18.5965	1.18647	9.5804e-72	2.17197e-70
cholangiocyte	PPM1G	18.5913	0.688631	2.90799e-72	6.6697e-71
cholangiocyte	EPS8L2	18.5892	0.998305	8.57666e-72	1.94722e-70
cholangiocyte	FAM43A	18.563	1.87904	7.0458e-70	1.52896e-68
cholangiocyte	GTF2A2	18.5613	0.712302	5.6234e-72	1.28228e-70
cholangiocyte	PLCD3	18.5524	1.42399	1.04597e-70	2.32109e-69
cholangiocyte	TM9SF3	18.5501	0.634548	4.78151e-72	1.09189e-70
cholangiocyte	NPTN	18.4684	0.762482	1.54649e-71	3.49596e-70
cholangiocyte	HDAC2	18.464	0.890766	6.43093e-71	1.43926e-69
cholangiocyte	TMC4	18.4353	1.26988	3.50805e-70	7.6655e-69
cholangiocyte	SMARCC1	18.43	0.862588	1.58427e-70	3.50569e-69
cholangiocyte	PEG10	18.4287	2.30007	2.79973e-68	5.9361e-67
cholangiocyte	CD164	18.4272	0.677165	9.35276e-71	2.08132e-69
cholangiocyte	PPP1R14B	18.4018	0.62775	7.23368e-71	1.61432e-69
cholangiocyte	LIMA1	18.3645	1.09877	1.10353e-69	2.38809e-68
cholangiocyte	FAM3C	18.3575	0.811361	1.80506e-70	3.98865e-69
cholangiocyte	TTC39A	18.3175	1.94343	5.63962e-68	1.19413e-66
cholangiocyte	NBEA	18.3059	2.50622	1.54818e-67	3.26489e-66
cholangiocyte	PBX1	18.2684	1.58586	1.71812e-68	3.65268e-67
cholangiocyte	DSTN	18.1639	0.472133	3.41653e-70	7.48635e-69
cholangiocyte	TPGS2	18.1394	0.821524	7.06899e-69	1.51309e-67
cholangiocyte	SRP9	18.1314	0.537628	2.09935e-69	4.52439e-68
cholangiocyte	PRSS23	18.1224	1.04459	4.47353e-69	9.61472e-68
cholangiocyte	AP1S3	18.1155	1.47806	7.46792e-68	1.57912e-66
cholangiocyte	SAMD12	18.0876	1.91826	1.07512e-66	2.22252e-65
cholangiocyte	FXYD3	18.0869	1.67945	5.01688e-67	1.04259e-65
cholangiocyte	ATP2A3	18.0853	3.35082	2.11668e-65	4.26349e-64
cholangiocyte	GABARAPL2	18.0349	0.600122	1.37053e-68	2.91766e-67
cholangiocyte	CAPN12	17.9808	2.28662	3.2062e-65	6.43328e-64
cholangiocyte	PROCR	17.9651	1.44902	1.08909e-66	2.24845e-65
cholangiocyte	FUCA1	17.9543	1.00009	2.67902e-67	5.62702e-66
cholangiocyte	NOSTRIN	17.9247	1.37053	1.44882e-66	2.98718e-65
cholangiocyte	FLRT2	17.916	3.73199	4.51458e-64	8.74582e-63
cholangiocyte	SRPK1	17.904	0.85961	2.77497e-67	5.82076e-66
cholangiocyte	CSDE1	17.8896	0.523349	9.61676e-68	2.03076e-66
cholangiocyte	NCK2	17.8856	0.997727	3.92248e-67	8.18407e-66
cholangiocyte	RNASE1	17.8738	4.67613	1.97078e-63	3.76677e-62
cholangiocyte	FNBP1L	17.8318	0.853996	9.52695e-67	1.97464e-65
cholangiocyte	APLP2	17.795	0.577174	3.54079e-67	7.40737e-66
cholangiocyte	RHOC	17.7527	0.604114	4.74946e-67	9.88328e-66
cholangiocyte	IFI27L2	17.7419	1.19635	1.89228e-65	3.8213e-64
cholangiocyte	STK38L	17.7283	1.28238	4.23657e-65	8.45752e-64
cholangiocyte	SERINC2	17.7177	0.680679	1.0292e-66	2.13041e-65
cholangiocyte	MDK	17.7064	1.41724	2.80565e-65	5.63678e-64
cholangiocyte	ARHGAP5	17.6867	0.829226	1.42228e-65	2.89449e-64
cholangiocyte	GPR35	17.6756	1.64795	1.50146e-64	2.94868e-63
cholangiocyte	ARL4A	17.6496	0.831672	2.0194e-65	4.07276e-64
cholangiocyte	SLC39A4	17.6405	1.31814	1.40329e-64	2.7628e-63
cholangiocyte	ANXA5	17.6273	0.569593	6.26083e-66	1.28078e-64
cholangiocyte	MAP1LC3B	17.6104	0.762408	1.50554e-65	3.05997e-64
cholangiocyte	THBS1	17.6098	1.46918	1.97065e-64	3.8539e-63
cholangiocyte	ARHGAP18	17.6012	0.946772	1.05738e-64	2.0949e-63
cholangiocyte	BTF3L4	17.5896	0.798211	4.19789e-65	8.39097e-64
cholangiocyte	ABRACL	17.5824	0.641914	1.51298e-65	3.06321e-64
cholangiocyte	CIRBP	17.5716	0.607339	1.87181e-65	3.78482e-64
cholangiocyte	GALNT6	17.5648	2.97685	2.4377e-62	4.54853e-61
cholangiocyte	PROM1	17.5561	1.53547	1.10696e-63	2.1313e-62
cholangiocyte	ITGB8	17.5376	1.95292	3.44384e-63	6.52668e-62
cholangiocyte	AP2M1	17.5293	0.676012	1.5082e-65	3.06141e-64
cholangiocyte	UQCRH	17.5226	0.474311	6.00297e-65	1.19534e-63
cholangiocyte	TPM3	17.5142	0.601601	1.09165e-64	2.16007e-63
cholangiocyte	CARD11	17.5114	2.1372	6.3931e-63	1.20434e-61
cholangiocyte	UBE2N	17.5015	0.718185	7.47945e-65	1.48746e-63
cholangiocyte	DYNC1I2	17.4818	0.794113	3.26396e-64	6.33871e-63
cholangiocyte	BCL2L1	17.4585	0.68379	1.15403e-64	2.28062e-63
cholangiocyte	SAP18	17.4464	0.471983	1.31511e-64	2.59243e-63
cholangiocyte	NUTF2	17.4367	0.705667	3.66331e-64	7.10547e-63
cholangiocyte	TMBIM4	17.4335	0.565863	2.41184e-64	4.69547e-63
cholangiocyte	ARHGAP26	17.3909	1.55481	1.41034e-62	2.64099e-61
cholangiocyte	SPATS2	17.3836	1.0409	4.20568e-63	7.95132e-62
cholangiocyte	FABP5	17.3721	1.42661	3.24693e-63	6.16094e-62
cholangiocyte	MYL12A	17.3715	0.482867	2.15013e-64	4.19636e-63
cholangiocyte	DDA1	17.3338	0.870139	3.78759e-63	7.1695e-62
cholangiocyte	SPCS1	17.329	0.458338	1.2181e-63	2.33956e-62
cholangiocyte	ERH	17.3109	0.475053	1.11411e-63	2.14245e-62
cholangiocyte	FAM177A1	17.3003	0.780296	2.92362e-63	5.5609e-62
cholangiocyte	ARPC2	17.2891	0.51913	4.68172e-64	9.05844e-63
cholangiocyte	ABHD2	17.2838	0.761715	1.53597e-63	2.93929e-62
cholangiocyte	ATP9A	17.2337	1.35716	9.0295e-62	1.67291e-60
cholangiocyte	PDLIM4	17.2163	1.71061	2.41799e-61	4.44837e-60
cholangiocyte	DEGS2	17.2042	2.84959	3.75061e-60	6.72669e-59
cholangiocyte	BTF3	17.1945	0.399421	6.96716e-63	1.31091e-61
cholangiocyte	LGALS9	17.1943	1.546	2.09931e-61	3.86661e-60
cholangiocyte	TAGLN2	17.1697	0.811885	3.44137e-62	6.41369e-61
cholangiocyte	PRRG2	17.1696	1.44573	2.46225e-61	4.5245e-60
cholangiocyte	GPC4	17.1619	2.81148	4.87172e-60	8.67796e-59
cholangiocyte	TM2D2	17.1617	0.81147	4.18717e-62	7.78516e-61
cholangiocyte	GPR160	17.131	2.60162	8.23362e-60	1.45838e-58
cholangiocyte	FUNDC1	17.1292	1.12983	1.92452e-61	3.55301e-60
cholangiocyte	PDXK	17.1276	0.839734	1.13878e-61	2.10734e-60
cholangiocyte	UBE2H	17.1251	0.791339	6.68204e-62	1.24092e-60
cholangiocyte	CHMP2B	17.1103	0.655886	3.53594e-62	6.58212e-61
cholangiocyte	GALNT10	17.1023	1.14506	3.74916e-61	6.85717e-60
cholangiocyte	TSPAN15	17.0956	1.27753	2.05575e-61	3.79084e-60
cholangiocyte	CD2AP	17.0594	0.746088	8.23197e-62	1.52695e-60
cholangiocyte	TMEM51	17.0484	1.70685	2.77873e-60	4.98933e-59
cholangiocyte	DCAF7	17.0362	0.980483	5.17891e-61	9.43919e-60
cholangiocyte	SRSF9	16.9966	0.500749	1.34065e-61	2.478e-60
cholangiocyte	SLAMF7	16.9739	6.01017	6.67836e-58	1.13924e-56
cholangiocyte	SYTL2	16.9684	2.08351	2.73919e-59	4.78172e-58
cholangiocyte	RCAN3	16.9595	1.68438	1.11264e-59	1.96412e-58
cholangiocyte	DDX5	16.9545	0.482414	3.44795e-61	6.31361e-60
cholangiocyte	EDN1	16.9485	1.53535	5.02285e-60	8.93704e-59
cholangiocyte	ITM2C	16.9301	0.912296	8.48683e-61	1.54504e-59
cholangiocyte	CXCL5	16.9198	1.72045	8.67871e-60	1.53549e-58
cholangiocyte	RFK	16.9133	0.832974	2.10287e-60	3.78011e-59
cholangiocyte	TMOD3	16.9109	0.713915	1.20915e-60	2.19364e-59
cholangiocyte	TRAPPC3	16.9074	0.725039	9.42217e-61	1.71333e-59
cholangiocyte	ZFYVE21	16.9048	0.917502	3.88837e-60	6.94997e-59
cholangiocyte	VDAC2	16.8984	0.593898	4.24068e-61	7.73813e-60
cholangiocyte	CTXN1	16.8967	1.92898	5.95598e-59	1.03397e-57
cholangiocyte	HAPLN3	16.8964	2.58441	1.77105e-58	3.05769e-57
cholangiocyte	ATP6AP1	16.8938	0.769507	1.46851e-60	2.65498e-59
cholangiocyte	TMEM59	16.8512	0.573401	1.58275e-60	2.85822e-59
cholangiocyte	VPS35	16.8236	0.729937	6.77166e-60	1.20214e-58
cholangiocyte	COL4A4	16.8234	2.22525	1.0642e-58	1.84341e-57
cholangiocyte	AP2B1	16.822	0.993171	1.66231e-59	2.91874e-58
cholangiocyte	SPNS2	16.8088	2.77012	1.37371e-57	2.32819e-56
cholangiocyte	CLDN7	16.7831	0.877438	1.84448e-60	3.32324e-59
cholangiocyte	HYAL2	16.7685	0.998479	2.5918e-59	4.52945e-58
cholangiocyte	SLC52A2	16.7606	0.979676	1.08668e-59	1.92046e-58
cholangiocyte	BZW2	16.742	0.802284	1.87341e-59	3.28496e-58
cholangiocyte	PIN1	16.7092	0.708795	2.92355e-59	5.09788e-58
cholangiocyte	SLC12A2	16.689	1.11868	4.26181e-59	7.42321e-58
cholangiocyte	SUSD6	16.685	1.37758	2.97531e-58	5.09761e-57
cholangiocyte	PRR5L	16.6786	2.20615	1.58703e-57	2.67834e-56
cholangiocyte	UBXN1	16.6642	0.5473	2.14687e-59	3.75607e-58
cholangiocyte	GNAS	16.6641	0.47852	8.14253e-60	1.44387e-58
cholangiocyte	SPTBN2	16.6276	1.74938	2.15192e-57	3.61592e-56
cholangiocyte	SLC4A4	16.6054	1.50943	2.00488e-57	3.37606e-56
cholangiocyte	STX3	16.585	1.20657	7.1379e-58	1.21631e-56
cholangiocyte	HSPA4	16.5757	0.670381	1.80796e-58	3.11116e-57
cholangiocyte	GTF2F2	16.5757	0.894557	4.70703e-58	8.04702e-57
cholangiocyte	ATRX	16.5714	0.615823	1.78341e-58	3.07565e-57
cholangiocyte	CASZ1	16.5593	2.13788	1.10348e-56	1.81538e-55
cholangiocyte	SLC22A3	16.5581	1.8296	1.07453e-56	1.7696e-55
cholangiocyte	XRCC4	16.5512	1.62139	9.95342e-57	1.64263e-55
cholangiocyte	CTTNBP2NL	16.5437	1.06978	7.83322e-58	1.3319e-56
cholangiocyte	TMED4	16.5134	0.680705	3.98954e-58	6.82784e-57
cholangiocyte	ZFP36L2	16.51	0.876063	6.60713e-58	1.12831e-56
cholangiocyte	CARD6	16.5073	1.32877	2.91597e-57	4.8737e-56
cholangiocyte	FOXC1	16.4627	2.6423	1.05844e-55	1.69167e-54
cholangiocyte	DCBLD2	16.4504	1.02223	1.88743e-57	3.18169e-56
cholangiocyte	ITPR2	16.445	1.10417	5.78362e-57	9.6155e-56
cholangiocyte	ST3GAL1	16.4435	1.1716	7.82345e-57	1.2952e-55
cholangiocyte	TMPRSS4	16.4353	1.59274	8.27356e-57	1.36827e-55
cholangiocyte	FXYD5	16.4066	0.812706	1.56028e-57	2.6387e-56
cholangiocyte	PRPF40A	16.403	0.547419	2.03894e-57	3.42974e-56
cholangiocyte	IGF2BP3	16.4021	1.04786	6.86915e-57	1.13961e-55
cholangiocyte	SDCBP2	16.397	0.848553	1.45186e-57	2.45799e-56
cholangiocyte	TMBIM6	16.3817	0.406094	2.39828e-57	4.02129e-56
cholangiocyte	CCT2	16.3698	0.535816	2.55066e-57	4.27223e-56
cholangiocyte	HLA-DMA	16.3686	2.40866	3.41985e-55	5.38369e-54
cholangiocyte	GNPTAB	16.3562	1.17994	2.04478e-56	3.33598e-55
cholangiocyte	PRKACB	16.3492	1.04843	1.36861e-56	2.24684e-55
cholangiocyte	PPP1R14C	16.3483	1.86481	8.57054e-56	1.3754e-54
cholangiocyte	LFNG	16.3345	2.01868	1.38624e-55	2.20885e-54
cholangiocyte	DRAM1	16.3328	1.56674	9.92932e-56	1.58859e-54
cholangiocyte	C1GALT1	16.3308	0.91791	1.29486e-56	2.12799e-55
cholangiocyte	ACTG1	16.3259	0.732689	2.55857e-57	4.2809e-56
cholangiocyte	ANXA10	16.3228	4.84939	3.65145e-54	5.6243e-53
cholangiocyte	MYEF2	16.3035	3.29361	1.7053e-54	2.65266e-53
cholangiocyte	PRKCI	16.2979	1.10696	4.82579e-56	7.7911e-55
cholangiocyte	SYK	16.2821	4.29098	4.1115e-54	6.32052e-53
cholangiocyte	FAM3B	16.2635	3.69536	4.84353e-54	7.43132e-53
cholangiocyte	PRRC2C	16.2522	0.527836	1.45429e-56	2.38501e-55
cholangiocyte	FSTL3	16.2234	1.34177	2.55987e-55	4.05016e-54
cholangiocyte	CMIP	16.2179	0.999114	8.14192e-56	1.30929e-54
cholangiocyte	VAMP3	16.2171	0.731075	3.39555e-56	5.50542e-55
cholangiocyte	MTPN	16.2154	0.630089	2.38322e-56	3.87606e-55
cholangiocyte	MVP	16.1902	0.668972	4.83007e-56	7.7911e-55
cholangiocyte	FAM83B	16.1683	3.22161	8.08555e-54	1.23212e-52
cholangiocyte	PON2	16.157	0.668297	2.2593e-56	3.68214e-55
cholangiocyte	RAB3B	16.1562	1.59395	1.07774e-54	1.68481e-53
cholangiocyte	FAR1	16.1447	1.81768	1.32114e-54	2.05713e-53
cholangiocyte	TRIM2	16.1372	1.53536	1.25786e-54	1.96248e-53
cholangiocyte	PACSIN2	16.1332	0.842205	1.6248e-55	2.58373e-54
cholangiocyte	DNALI1	16.1309	1.13503	4.75337e-55	7.46803e-54
cholangiocyte	PTPRF	16.1296	0.781274	9.57663e-56	1.53373e-54
cholangiocyte	RRAS	16.1289	0.749467	8.47987e-56	1.36224e-54
cholangiocyte	VPS4B	16.1235	0.805448	2.50601e-55	3.96895e-54
cholangiocyte	PLP2	16.1171	0.798841	1.35154e-55	2.15574e-54
cholangiocyte	CTTN	16.0946	0.640906	1.44948e-55	2.30728e-54
cholangiocyte	HSBP1	16.0706	0.53479	1.95227e-55	3.09819e-54
cholangiocyte	TRAPPC4	16.0663	0.731876	3.34226e-55	5.26682e-54
cholangiocyte	BEX4	16.0644	1.85812	6.77812e-54	1.03389e-52
cholangiocyte	ARL6IP1	16.0595	0.650857	2.76816e-55	4.3753e-54
cholangiocyte	SNX6	16.0547	0.656553	4.14111e-55	6.51261e-54
cholangiocyte	SLC25A24	16.0462	0.939199	1.16066e-54	1.81264e-53
cholangiocyte	SLC39A10	16.0299	1.08586	1.26793e-54	1.97624e-53
cholangiocyte	BHLHE41	16.0294	2.9729	5.91787e-53	8.85483e-52
cholangiocyte	HNRNPA1	16.0184	0.46452	2.82991e-55	4.46841e-54
cholangiocyte	TNFAIP8	16.0035	1.30148	5.12314e-54	7.845e-53
cholangiocyte	RALY	15.9993	0.740024	7.0313e-55	1.10358e-53
cholangiocyte	SLC35F2	15.9983	1.56213	8.14731e-54	1.24033e-52
cholangiocyte	LMO7	15.9555	0.824742	2.49725e-54	3.86165e-53
cholangiocyte	TESC	15.9455	0.849607	7.70788e-55	1.20857e-53
cholangiocyte	ARFIP1	15.9399	0.873967	4.39077e-54	6.74325e-53
cholangiocyte	ABR	15.9379	1.46477	1.6486e-53	2.4881e-52
cholangiocyte	PIGS	15.9211	1.24296	1.10395e-53	1.67379e-52
cholangiocyte	DYNC1H1	15.9165	0.715177	1.98106e-54	3.07249e-53
cholangiocyte	KCNJ15	15.9111	4.23799	7.26802e-52	1.06024e-50
cholangiocyte	TMPRSS3	15.8878	5.1129	1.21599e-51	1.75916e-50
cholangiocyte	KTN1	15.8868	0.55194	5.03183e-54	7.71269e-53
cholangiocyte	IL1RN	15.8848	2.42465	1.30392e-52	1.93264e-51
cholangiocyte	RBBP8	15.8696	1.22566	2.5837e-53	3.88818e-52
cholangiocyte	PLEKHB2	15.8652	0.928597	8.5843e-54	1.30433e-52
cholangiocyte	EIF4G2	15.8639	0.486271	5.81685e-54	8.88129e-53
cholangiocyte	MYL6	15.862	0.50066	3.45619e-54	5.32877e-53
cholangiocyte	APH1A	15.8346	0.677986	1.11429e-53	1.68658e-52
cholangiocyte	EFNA5	15.8345	2.52841	3.95561e-52	5.8081e-51
cholangiocyte	USP54	15.8117	2.31128	4.09319e-52	6.0045e-51
cholangiocyte	TRIOBP	15.8089	0.961722	3.05722e-53	4.58758e-52
cholangiocyte	PPP1R2	15.7777	0.722034	2.74581e-53	4.12818e-52
cholangiocyte	LY6E	15.7718	0.838225	3.66898e-53	5.50031e-52
cholangiocyte	PIK3IP1	15.7649	1.93007	3.91858e-52	5.7591e-51
cholangiocyte	PSMC5	15.7563	0.553252	1.40578e-53	2.12572e-52
cholangiocyte	ARPC1A	15.7554	0.570942	1.61535e-53	2.44026e-52
cholangiocyte	DNAJA1	15.7435	0.523162	2.89858e-53	4.35369e-52
cholangiocyte	ARHGAP21	15.7196	0.872409	8.12915e-53	1.20944e-51
cholangiocyte	DDX6	15.7189	0.750355	6.44102e-53	9.61929e-52
cholangiocyte	VCL	15.7118	0.954915	6.61749e-53	9.86408e-52
cholangiocyte	SLC28A3	15.6443	4.88185	2.53808e-50	3.58596e-49
cholangiocyte	TSG101	15.6442	0.656488	1.32646e-52	1.96419e-51
cholangiocyte	SARAF	15.6355	0.528481	6.57778e-53	9.81419e-52
cholangiocyte	TNFRSF21	15.5978	0.988635	3.67905e-52	5.41213e-51
cholangiocyte	MANSC1	15.5937	1.38167	1.84714e-51	2.65754e-50
cholangiocyte	ATP6V0D1	15.5627	0.635581	3.55124e-52	5.229e-51
cholangiocyte	LAMTOR3	15.5602	0.805059	6.76441e-52	9.87692e-51
cholangiocyte	STON2	15.5588	2.68043	2.27992e-50	3.22701e-49
cholangiocyte	RHOD	15.5569	0.828422	5.36775e-52	7.85221e-51
cholangiocyte	WNT11	15.5565	3.52487	6.03501e-50	8.46572e-49
cholangiocyte	CDKN2A	15.5328	1.00347	9.52355e-52	1.38798e-50
cholangiocyte	BTBD10	15.5137	1.14984	3.73133e-51	5.33906e-50
cholangiocyte	VLDLR	15.5053	1.83376	2.02957e-50	2.88045e-49
cholangiocyte	AMOT	15.4804	1.6625	1.56593e-50	2.22445e-49
cholangiocyte	ZNF706	15.4742	0.512615	1.25392e-51	1.81236e-50
cholangiocyte	LAMA5	15.4735	1.08377	4.29606e-51	6.13595e-50
cholangiocyte	CUEDC1	15.4525	1.24804	8.65357e-51	1.2326e-49
cholangiocyte	ZDHHC20	15.4316	1.08276	8.43335e-51	1.20233e-49
cholangiocyte	RTN3	15.4289	0.577328	1.92409e-51	2.76573e-50
cholangiocyte	HHLA2	15.4077	4.7904	5.79381e-49	7.96383e-48
cholangiocyte	SYNPO	15.4052	1.6249	3.41067e-50	4.80584e-49
cholangiocyte	KRT18	15.4017	0.745263	1.19394e-51	1.72885e-50
cholangiocyte	MAP7	15.3817	0.976382	1.00066e-50	1.42403e-49
cholangiocyte	TIPARP	15.352	1.04582	2.07123e-50	2.93692e-49
cholangiocyte	ECT2	15.3316	1.12215	2.90379e-50	4.09897e-49
cholangiocyte	BCAS1	15.3305	2.43334	3.38862e-49	4.69476e-48
cholangiocyte	ABCC1	15.316	1.63194	1.318e-49	1.84227e-48
cholangiocyte	GJA1	15.3129	1.78718	1.42221e-49	1.9844e-48
cholangiocyte	BMPR2	15.2967	0.867339	3.27518e-50	4.61906e-49
cholangiocyte	ILF2	15.2951	0.586534	1.50563e-50	2.14072e-49
cholangiocyte	SPSB2	15.2919	1.58484	1.35052e-49	1.88604e-48
cholangiocyte	SCEL	15.2577	2.98996	1.56088e-48	2.1232e-47
cholangiocyte	CHMP4B	15.2514	0.81134	5.56376e-50	7.81862e-49
cholangiocyte	CDC42BPB	15.2424	0.759598	5.96829e-50	8.37961e-49
cholangiocyte	BCR	15.2376	1.18172	1.58674e-49	2.212e-48
cholangiocyte	PKP4	15.2038	1.00179	1.59849e-49	2.22641e-48
cholangiocyte	PIGT	15.2008	0.797057	8.36898e-50	1.17293e-48
cholangiocyte	BID	15.1842	0.736617	9.27664e-50	1.29898e-48
cholangiocyte	TMEM154	15.1674	2.3194	2.07558e-48	2.81358e-47
cholangiocyte	RAB27B	15.1554	1.53048	8.25541e-49	1.13078e-47
cholangiocyte	C15orf48	15.146	3.53023	9.91702e-48	1.31261e-46
cholangiocyte	CAPRIN1	15.1414	0.690542	1.87383e-49	2.60529e-48
cholangiocyte	TCEAL8	15.1082	0.687735	1.99509e-49	2.76898e-48
cholangiocyte	KRT6B	15.098	2.63506	5.35615e-48	7.13744e-47
cholangiocyte	TNFRSF11B	15.0954	1.32324	6.53379e-49	8.97311e-48
cholangiocyte	CRB3	15.0936	0.890295	4.02874e-49	5.57255e-48
cholangiocyte	PCMTD1	15.093	0.763818	4.27767e-49	5.90567e-48
cholangiocyte	RAI2	15.0746	3.41069	2.03616e-47	2.67475e-46
cholangiocyte	LPCAT1	15.0724	1.33085	2.30727e-48	3.11958e-47
cholangiocyte	SKP1	15.0596	0.682769	7.52486e-49	1.03162e-47
cholangiocyte	EIF4E	15.0591	0.656356	4.89073e-49	6.7402e-48
cholangiocyte	SPAG16	15.0534	0.893694	1.12503e-48	1.53432e-47
cholangiocyte	HHIP-AS1	15.0417	2.59139	1.63217e-47	2.15307e-46
cholangiocyte	FMN1	15.0246	1.80887	3.33586e-48	4.47947e-47
cholangiocyte	ODF2L	15.0008	0.93436	1.53564e-48	2.09068e-47
cholangiocyte	PTPRE	14.9872	2.27229	2.13222e-47	2.79627e-46
cholangiocyte	SMS	14.9872	0.791021	1.94739e-48	2.64438e-47
cholangiocyte	PTTG1IP	14.9869	0.625255	2.17826e-48	2.94768e-47
cholangiocyte	SLC44A2	14.984	1.51538	6.20844e-48	8.2452e-47
cholangiocyte	GDF15	14.9787	1.16204	3.05365e-48	4.10401e-47
cholangiocyte	TMEM87A	14.9781	0.769188	2.12829e-48	2.88255e-47
cholangiocyte	LBH	14.9565	1.34152	8.15077e-48	1.08065e-46
cholangiocyte	VWA5A	14.9483	2.47041	5.10249e-47	6.6143e-46
cholangiocyte	TFF1	14.9366	3.316	1.11853e-46	1.43807e-45
cholangiocyte	GCC2	14.9358	0.595496	1.64067e-48	2.2298e-47
cholangiocyte	IP6K2	14.9316	0.742803	3.50591e-48	4.69977e-47
cholangiocyte	CRABP2	14.9251	4.39875	2.52637e-46	3.21983e-45
cholangiocyte	RAMP1	14.9227	1.03705	5.70082e-48	7.59031e-47
cholangiocyte	TP53I3	14.9196	0.653147	2.86278e-48	3.85078e-47
cholangiocyte	CHMP4C	14.9181	0.840567	3.96584e-48	5.31179e-47
cholangiocyte	LRAT	14.9157	1.55684	2.29374e-47	3.00558e-46
cholangiocyte	DCTN5	14.9121	1.05101	1.05133e-47	1.38919e-46
cholangiocyte	PGM2L1	14.9015	1.04997	8.11843e-48	1.07727e-46
cholangiocyte	ELF1	14.8888	0.626906	4.28108e-48	5.71939e-47
cholangiocyte	ASAP2	14.8822	1.05624	1.793e-47	2.36126e-46
cholangiocyte	MLLT3	14.8681	1.05925	1.83426e-47	2.41357e-46
cholangiocyte	DMKN	14.8442	0.939983	1.72198e-47	2.26963e-46
cholangiocyte	MFHAS1	14.8432	1.08725	2.96527e-47	3.87582e-46
cholangiocyte	KIDINS220	14.8406	0.80508	1.56692e-47	2.06872e-46
cholangiocyte	ITGA2	14.8091	0.771363	1.0512e-47	1.38919e-46
cholangiocyte	DNAJC10	14.7961	0.754075	2.0818e-47	2.73243e-46
cholangiocyte	CD55	14.7881	1.70759	1.22522e-46	1.57266e-45
cholangiocyte	SMARCA4	14.78	0.730865	2.97326e-47	3.88303e-46
cholangiocyte	SAMD9	14.778	1.13585	8.59108e-47	1.10726e-45
cholangiocyte	TC2N	14.7581	1.44069	1.20261e-46	1.5449e-45
cholangiocyte	TRIM24	14.7517	0.787774	5.46296e-47	7.0699e-46
cholangiocyte	VTI1B	14.7393	0.582699	3.66552e-47	4.77501e-46
cholangiocyte	RBBP7	14.7393	0.72899	5.00881e-47	6.49821e-46
cholangiocyte	ITGAE	14.7357	0.840521	7.77015e-47	1.00227e-45
cholangiocyte	VPS26A	14.7337	0.708941	5.30943e-47	6.87688e-46
cholangiocyte	MAP2K6	14.7163	1.4673	2.95721e-46	3.762e-45
cholangiocyte	REEP1	14.6961	3.52461	3.15809e-45	3.91917e-44
cholangiocyte	STX1A	14.6952	1.84473	6.59326e-46	8.28031e-45
cholangiocyte	RASSF9	14.6737	2.68745	1.99454e-45	2.48503e-44
cholangiocyte	UCHL3	14.6467	0.717912	1.26348e-46	1.62046e-45
cholangiocyte	UBE2I	14.6419	0.478256	8.6757e-47	1.11724e-45
cholangiocyte	ERGIC3	14.6304	0.516115	1.96126e-46	2.50923e-45
cholangiocyte	ARF3	14.6239	0.652779	1.79808e-46	2.30233e-45
cholangiocyte	CNN2	14.6091	0.898394	4.56895e-46	5.78427e-45
cholangiocyte	PEX2	14.6074	0.882201	4.21599e-46	5.34172e-45
cholangiocyte	PPA2	14.6069	0.666818	2.85904e-46	3.64006e-45
cholangiocyte	PSMA4	14.6019	0.441092	1.98005e-46	2.53121e-45
cholangiocyte	ARL14	14.5965	2.1034	3.05576e-45	3.79518e-44
cholangiocyte	CETN2	14.5822	0.764645	4.90313e-46	6.19735e-45
cholangiocyte	TMBIM1	14.5743	0.721685	5.07523e-46	6.40457e-45
cholangiocyte	USP9Y	14.5634	1.4574	2.45405e-45	3.0527e-44
cholangiocyte	KIAA0232	14.5561	0.809188	8.61622e-46	1.08036e-44
cholangiocyte	SPRR3	14.55	5.9016	3.49357e-44	4.24497e-43
cholangiocyte	SCOC	14.5482	0.615634	4.70897e-46	5.95673e-45
cholangiocyte	TTC19	14.5407	0.784899	9.56343e-46	1.19532e-44
cholangiocyte	EI24	14.538	0.50676	4.95215e-46	6.25428e-45
cholangiocyte	REC8	14.532	3.01832	1.95242e-44	2.37786e-43
cholangiocyte	RSF1	14.5255	0.686253	9.04473e-46	1.13228e-44
cholangiocyte	SDF2	14.5201	0.579507	6.67957e-46	8.382e-45
cholangiocyte	MYO5B	14.52	0.945489	1.39861e-45	1.74531e-44
cholangiocyte	NDFIP1	14.514	0.592544	9.16785e-46	1.14678e-44
cholangiocyte	AGTRAP	14.5022	0.901673	2.17627e-45	2.7093e-44
cholangiocyte	NAV1	14.4669	1.23388	3.32449e-45	4.12242e-44
cholangiocyte	ADAP1	14.4667	1.86089	1.28564e-44	1.57066e-43
cholangiocyte	NIPAL3	14.4664	1.30916	5.16196e-45	6.36074e-44
cholangiocyte	ARPC5L	14.4659	0.544987	1.67388e-45	2.08717e-44
cholangiocyte	STRBP	14.4634	1.08418	4.03649e-45	4.98955e-44
cholangiocyte	SLC37A1	14.462	1.46025	7.4281e-45	9.11741e-44
cholangiocyte	MFSD6	14.4463	1.17039	6.10146e-45	7.50666e-44
cholangiocyte	CDKN2AIPNL	14.4084	0.946905	6.87625e-45	8.44666e-44
cholangiocyte	SH3BGRL	14.3912	0.59863	3.91446e-45	4.84253e-44
cholangiocyte	ARL2	14.3878	0.689513	4.11179e-45	5.07864e-44
cholangiocyte	STEAP1	14.3861	0.98901	1.05253e-44	1.28888e-43
cholangiocyte	IGBP1	14.3738	0.576271	4.66508e-45	5.75299e-44
cholangiocyte	RBM47	14.3621	0.965385	1.19298e-44	1.45859e-43
cholangiocyte	TGFBI	14.3604	1.30112	3.761e-44	4.56639e-43
cholangiocyte	ARL6IP5	14.3435	0.429912	4.54771e-45	5.61265e-44
cholangiocyte	B3GNT7	14.321	4.47226	4.40337e-43	5.22913e-42
cholangiocyte	MID1	14.2993	1.38282	6.49435e-44	7.85471e-43
cholangiocyte	FGF19	14.2977	2.75067	2.41424e-43	2.88662e-42
cholangiocyte	LYZ	14.2944	1.42259	3.80231e-44	4.61297e-43
cholangiocyte	HRH1	14.2902	2.5149	2.16368e-43	2.59493e-42
cholangiocyte	MXD1	14.2812	1.28811	5.60869e-44	6.79924e-43
cholangiocyte	PPP1CB	14.2796	0.602035	1.38653e-44	1.69261e-43
cholangiocyte	ATP8B1	14.2737	1.13981	6.11908e-44	7.41225e-43
cholangiocyte	PIP4K2C	14.2334	1.42475	1.53873e-43	1.85249e-42
cholangiocyte	PTK2	14.2138	0.908551	9.02235e-44	1.08871e-42
cholangiocyte	NTPCR	14.2137	0.736526	6.2714e-44	7.59091e-43
cholangiocyte	PPIA	14.2115	0.276096	3.10831e-44	3.77978e-43
cholangiocyte	ESRP1	14.1765	1.32315	2.2264e-43	2.66608e-42
cholangiocyte	FMNL2	14.1703	1.1885	1.82258e-43	2.18918e-42
cholangiocyte	DGUOK	14.1665	0.568021	7.77673e-44	9.39125e-43
cholangiocyte	STIM2	14.1551	1.05221	2.34446e-43	2.80531e-42
cholangiocyte	ABHD11	14.1466	1.11892	2.96888e-43	3.53365e-42
cholangiocyte	SSBP2	14.1463	1.20323	2.74947e-43	3.27995e-42
cholangiocyte	CCT6A	14.145	0.408581	7.37255e-44	8.91001e-43
cholangiocyte	HMGA2	14.1432	1.47715	5.19709e-43	6.15309e-42
cholangiocyte	VANGL2	14.1431	5.03425	4.36725e-42	5.04885e-41
cholangiocyte	CCK	14.1164	2.23995	1.31808e-42	1.54309e-41
cholangiocyte	PAIP1	14.1119	0.585197	1.645e-43	1.97891e-42
cholangiocyte	SDR16C5	14.1117	3.97829	4.28683e-42	4.95953e-41
cholangiocyte	PGLS	14.1053	0.476528	1.42591e-43	1.71798e-42
cholangiocyte	CD47	14.0955	0.698612	2.43706e-43	2.91168e-42
cholangiocyte	STXBP2	14.0872	1.08967	5.20266e-43	6.15505e-42
cholangiocyte	ADAM15	14.0703	1.14006	8.23154e-43	9.69458e-42
cholangiocyte	PPP1R11	14.0586	0.764923	4.71278e-43	5.59233e-42
cholangiocyte	ENPP5	14.0534	2.14768	3.22586e-42	3.74033e-41
cholangiocyte	VWA1	14.0457	1.05493	8.69636e-43	1.02343e-41
cholangiocyte	KIAA1522	14.0436	0.795707	4.93233e-43	5.84403e-42
cholangiocyte	TMEM14A	14.0051	0.724853	9.30287e-43	1.09317e-41
cholangiocyte	STUB1	14.0022	0.45646	4.37558e-43	5.20005e-42
cholangiocyte	HLA-DRA	13.9952	3.81262	2.10001e-41	2.39428e-40
cholangiocyte	ETS2	13.9771	0.77293	1.50227e-42	1.75481e-41
cholangiocyte	PLEKHB1	13.9748	1.81752	4.95051e-42	5.70634e-41
cholangiocyte	SH3GLB1	13.9732	0.54793	6.06225e-43	7.15582e-42
cholangiocyte	TMEM163	13.9698	2.84294	1.39253e-41	1.59113e-40
cholangiocyte	VPS41	13.9697	0.756267	1.42749e-42	1.6687e-41
cholangiocyte	PSMD2	13.9645	0.640586	1.25723e-42	1.47296e-41
cholangiocyte	RNF7	13.9635	0.409546	7.43207e-43	8.76616e-42
cholangiocyte	TWF1	13.9508	0.640139	1.58362e-42	1.84846e-41
cholangiocyte	WFDC2	13.9457	2.00182	8.97942e-42	1.02825e-40
cholangiocyte	RNF11	13.9272	0.736749	2.42614e-42	2.81931e-41
cholangiocyte	CCNG2	13.9209	1.30342	5.847e-42	6.71998e-41
cholangiocyte	UCP2	13.9093	4.75788	7.13594e-41	8.04252e-40
cholangiocyte	VPS37B	13.9067	1.42151	8.63399e-42	9.89413e-41
cholangiocyte	PAM	13.8993	0.946116	2.73795e-42	3.17695e-41
cholangiocyte	PPA1	13.8794	0.424072	1.63557e-42	1.90768e-41
cholangiocyte	TMEM25	13.86	1.21383	1.11326e-41	1.27388e-40
cholangiocyte	SDC1	13.8526	0.629801	3.39623e-42	3.93497e-41
cholangiocyte	DDRGK1	13.8484	0.497202	4.42404e-42	5.11074e-41
cholangiocyte	TKT	13.8246	0.444684	6.15931e-42	7.07375e-41
cholangiocyte	LY75	13.8214	2.91548	9.05096e-41	1.01789e-39
cholangiocyte	RPS6KA1	13.7926	1.41176	3.6495e-41	4.14887e-40
cholangiocyte	KCNQ1	13.7889	3.26769	1.79239e-40	2.00144e-39
cholangiocyte	YBX1	13.7835	0.300649	6.31831e-42	7.25106e-41
cholangiocyte	PAK1	13.7728	0.928643	2.60816e-41	2.97148e-40
cholangiocyte	TRAPPC1	13.7697	0.463078	1.24414e-41	1.42261e-40
cholangiocyte	TEX9	13.762	1.23682	3.96609e-41	4.50552e-40
cholangiocyte	MST1R	13.7572	1.71328	7.87449e-41	8.86219e-40
cholangiocyte	PSMB6	13.7408	0.404622	1.57333e-41	1.79641e-40
cholangiocyte	OAS1	13.7341	1.14591	6.39746e-41	7.22577e-40
cholangiocyte	BSPRY	13.7286	1.55931	9.8774e-41	1.11004e-39
cholangiocyte	TMEM179B	13.7048	0.494268	2.89807e-41	3.297e-40
cholangiocyte	DNAJB6	13.6837	0.624636	4.44168e-41	5.03486e-40
cholangiocyte	TXNDC9	13.6793	0.655691	5.0402e-41	5.70097e-40
cholangiocyte	PLAUR	13.6682	0.961805	6.9733e-41	7.86486e-40
cholangiocyte	TMEM219	13.6654	0.438974	4.65652e-41	5.27459e-40
cholangiocyte	CXCL3	13.6517	1.77566	3.0579e-40	3.39525e-39
cholangiocyte	AQP1	13.6332	3.33654	1.48054e-39	1.6187e-38
cholangiocyte	CCDC90B	13.6104	0.621473	1.12589e-40	1.26439e-39
cholangiocyte	LYPLA1	13.5875	0.569901	1.57791e-40	1.76571e-39
cholangiocyte	SEMA3E	13.5845	2.95919	1.62568e-39	1.77369e-38
cholangiocyte	PIK3R3	13.5754	2.42372	1.50851e-39	1.64814e-38
cholangiocyte	PITPNC1	13.5744	1.1925	3.93558e-40	4.35436e-39
cholangiocyte	TM9SF2	13.5698	0.52018	1.78846e-40	1.99847e-39
cholangiocyte	ABHD3	13.5631	1.07887	4.92793e-40	5.44081e-39
cholangiocyte	ADAMTS9	13.5617	2.68492	2.63358e-39	2.84568e-38
cholangiocyte	SGPL1	13.557	0.979185	4.28086e-40	4.73151e-39
cholangiocyte	TMEM132A	13.5562	1.01033	3.48551e-40	3.86457e-39
cholangiocyte	CLCN3	13.5436	0.805552	3.75356e-40	4.1559e-39
cholangiocyte	ARL3	13.5361	0.657169	3.22946e-40	3.58319e-39
cholangiocyte	TMEM9	13.5193	0.69226	4.28248e-40	4.73151e-39
cholangiocyte	LPCAT4	13.5109	1.29186	1.17893e-39	1.29344e-38
cholangiocyte	TNFSF15	13.4791	1.37289	2.00605e-39	2.1796e-38
cholangiocyte	RCC2	13.4729	0.857977	1.00334e-39	1.10388e-38
cholangiocyte	STK39	13.4612	1.10576	1.72432e-39	1.8774e-38
cholangiocyte	ARPP19	13.4498	0.624875	1.06354e-39	1.1693e-38
cholangiocyte	SMPDL3B	13.4498	0.955337	1.26713e-39	1.38827e-38
cholangiocyte	EDAR	13.4405	3.55845	1.33503e-38	1.42008e-37
cholangiocyte	TES	13.4402	0.731831	1.23881e-39	1.3582e-38
cholangiocyte	ATP10B	13.4397	3.96905	1.67691e-38	1.77772e-37
cholangiocyte	PDCD10	13.4255	0.552334	1.11899e-39	1.2294e-38
cholangiocyte	RNF149	13.4247	0.779677	1.90536e-39	2.07164e-38
cholangiocyte	EPHX4	13.4234	4.57195	2.2748e-38	2.3906e-37
cholangiocyte	BPTF	13.4178	0.582751	1.46791e-39	1.60601e-38
cholangiocyte	ZFHX3	13.4147	0.982685	2.21568e-39	2.40239e-38
cholangiocyte	CMTM4	13.4106	1.05148	2.69946e-39	2.91486e-38
cholangiocyte	AKAP13	13.4047	0.631583	1.28435e-39	1.40616e-38
cholangiocyte	CLIC5	13.4014	4.52761	2.90275e-38	3.04034e-37
cholangiocyte	RUSC1	13.4	1.05775	2.80642e-39	3.02827e-38
cholangiocyte	PPL	13.3939	1.22421	4.31828e-39	4.63735e-38
cholangiocyte	SYNJ2BP	13.3931	0.726798	2.2738e-39	2.46371e-38
cholangiocyte	LPAR2	13.3916	1.3903	4.56093e-39	4.88792e-38
cholangiocyte	IL18	13.381	0.78654	1.15651e-39	1.26974e-38
cholangiocyte	SLMAP	13.3707	0.782362	3.11294e-39	3.34983e-38
cholangiocyte	HSPH1	13.3706	0.658005	2.55237e-39	2.75983e-38
cholangiocyte	TAX1BP1	13.36	0.473924	2.17426e-39	2.35911e-38
cholangiocyte	SPTLC2	13.3533	0.989998	5.19721e-39	5.55843e-38
cholangiocyte	TFF3	13.3532	1.45643	1.05954e-38	1.12857e-37
cholangiocyte	MIEN1	13.3432	0.527936	2.93543e-39	3.16531e-38
cholangiocyte	ADIPOR1	13.3423	0.754987	4.33622e-39	4.65344e-38
cholangiocyte	RHOA	13.3266	0.409131	2.15755e-39	2.34259e-38
cholangiocyte	IL32	13.2956	0.618336	3.11176e-39	3.34983e-38
cholangiocyte	ATP2C1	13.2872	0.845804	9.09112e-39	9.69658e-38
cholangiocyte	GSTO2	13.2839	1.34612	1.84257e-38	1.95071e-37
cholangiocyte	PLEKHG1	13.2816	1.55246	2.46924e-38	2.59146e-37
cholangiocyte	METRNL	13.2803	1.48176	1.79576e-38	1.90244e-37
cholangiocyte	COMMD9	13.2684	0.708315	9.63537e-39	1.02701e-37
cholangiocyte	MARK2	13.2634	0.810347	1.18668e-38	1.26314e-37
cholangiocyte	IQCE	13.2605	0.944333	1.4768e-38	1.5677e-37
cholangiocyte	ROR1	13.242	1.81398	5.00029e-38	5.20607e-37
cholangiocyte	SLC44A3	13.2394	1.00338	2.03582e-38	2.14807e-37
cholangiocyte	GNAI2	13.2162	0.547544	1.51164e-38	1.6036e-37
cholangiocyte	PPP3CA	13.2113	0.798945	2.61598e-38	2.74363e-37
cholangiocyte	RNF167	13.1954	0.667611	2.08502e-38	2.19851e-37
cholangiocyte	LYPD3	13.191	2.32472	1.7222e-37	1.76847e-36
cholangiocyte	BLOC1S2	13.1829	0.567918	1.98638e-38	2.09732e-37
cholangiocyte	IFT22	13.1786	0.73655	2.69069e-38	2.82011e-37
cholangiocyte	CDKN1A	13.1771	0.641733	2.1206e-38	2.23452e-37
cholangiocyte	YIPF3	13.164	0.492108	2.38835e-38	2.50825e-37
cholangiocyte	LRBA	13.1607	0.809452	4.37101e-38	4.55693e-37
cholangiocyte	PWWP2B	13.1582	2.07733	1.90643e-37	1.95636e-36
cholangiocyte	RHBDL2	13.1566	3.61456	3.83322e-37	3.89293e-36
cholangiocyte	B3GNT5	13.1443	1.17534	7.70822e-38	7.98312e-37
cholangiocyte	UBE2D2	13.1421	0.486325	3.10402e-38	3.24682e-37
cholangiocyte	CTBP2	13.1405	0.705283	3.94411e-38	4.11461e-37
cholangiocyte	WNT10A	13.1403	2.11708	2.1547e-37	2.20393e-36
cholangiocyte	CD58	13.1351	0.668166	3.50541e-38	3.65936e-37
cholangiocyte	BAIAP2L1	13.129	0.843685	6.26732e-38	6.49939e-37
cholangiocyte	FTH1	13.1233	0.35934	5.00365e-38	5.20611e-37
cholangiocyte	PTK6	13.1222	4.58089	7.80723e-37	7.83266e-36
cholangiocyte	TBC1D19	13.1135	1.7967	2.24191e-37	2.29016e-36
cholangiocyte	TSPAN5	13.1112	1.09389	5.97655e-38	6.20196e-37
cholangiocyte	SPINK5	13.108	5.49119	1.02358e-36	1.0243e-35
cholangiocyte	CCT3	13.1045	0.390697	5.47655e-38	5.68685e-37
cholangiocyte	CNKSR1	13.097	2.18107	3.26897e-37	3.3285e-36
cholangiocyte	CORO1B	13.0917	0.668316	9.19425e-38	9.51586e-37
cholangiocyte	RAB3D	13.0861	2.604	5.86015e-37	5.90185e-36
cholangiocyte	VCAN	13.0827	0.669744	9.33712e-38	9.65738e-37
cholangiocyte	FGF2	13.0782	1.22573	1.98807e-37	2.03748e-36
cholangiocyte	ARF5	13.0776	0.523195	7.47132e-38	7.74287e-37
cholangiocyte	DPCD	13.0745	0.764043	1.16565e-37	1.20325e-36
cholangiocyte	CNOT6	13.0723	1.05365	1.91244e-37	1.96124e-36
cholangiocyte	FRMD6	13.071	1.16069	3.02115e-37	3.08016e-36
cholangiocyte	B3GALT4	13.0656	2.13508	5.72342e-37	5.76784e-36
cholangiocyte	GULP1	13.0604	1.12005	1.18897e-37	1.22652e-36
cholangiocyte	PGD	13.0601	0.708425	1.27987e-37	1.31942e-36
cholangiocyte	ACTR10	13.05	0.701581	1.15621e-37	1.1943e-36
cholangiocyte	EIF3I	13.0401	0.400525	1.08344e-37	1.11986e-36
cholangiocyte	HLA-DMB	13.0178	4.03318	2.1546e-36	2.13571e-35
cholangiocyte	LITAF	13.0037	0.591962	2.16186e-37	2.20982e-36
cholangiocyte	PLEKHG5	13.0001	2.79604	1.78078e-36	1.76962e-35
cholangiocyte	ZBTB7C	12.9907	5.94975	3.9632e-36	3.89893e-35
cholangiocyte	C4orf48	12.9879	1.11025	5.88254e-37	5.9206e-36
cholangiocyte	EFCAB14	12.9852	0.660582	3.28091e-37	3.33849e-36
cholangiocyte	RHOV	12.9786	2.83609	2.54242e-36	2.51062e-35
cholangiocyte	AP1S1	12.9577	0.488944	3.0515e-37	3.10908e-36
cholangiocyte	PIGG	12.9539	1.01843	7.60657e-37	7.63621e-36
cholangiocyte	SMARCA5	12.9508	0.524372	3.934e-37	3.99271e-36
cholangiocyte	PIGR	12.9416	1.65873	2.32245e-36	2.29918e-35
cholangiocyte	CUX1	12.9342	0.685468	5.44196e-37	5.49477e-36
cholangiocyte	JARID2	12.9211	1.12771	1.18975e-36	1.1868e-35
cholangiocyte	NAP1L4	12.9155	0.560465	6.8992e-37	6.93495e-36
cholangiocyte	CD59	12.9128	0.49073	4.27436e-37	4.32975e-36
cholangiocyte	PDCD6IP	12.9048	0.56415	6.94055e-37	6.97206e-36
cholangiocyte	MTX2	12.9019	0.721944	9.38759e-37	9.40615e-36
cholangiocyte	PTPRB	12.898	4.45358	9.84647e-36	9.58475e-35
cholangiocyte	SEZ6L2	12.8976	0.976796	1.18421e-36	1.18203e-35
cholangiocyte	PKIB	12.8878	0.633787	5.494e-37	5.5402e-36
cholangiocyte	TLE3	12.8794	1.63788	3.23222e-36	3.18779e-35
cholangiocyte	ASAH1	12.8671	0.577179	9.48618e-37	9.49888e-36
cholangiocyte	PGK1	12.8621	0.410724	1.14138e-36	1.14072e-35
cholangiocyte	NCOR1	12.8609	0.468522	1.18202e-36	1.1806e-35
cholangiocyte	TMEM147	12.8579	0.484419	1.28568e-36	1.28087e-35
cholangiocyte	SPATA20	12.8466	0.852383	2.05826e-36	2.0415e-35
cholangiocyte	HLA-DRB1	12.8462	3.03827	1.20724e-35	1.17225e-34
cholangiocyte	YIPF1	12.8413	0.984448	2.67565e-36	2.64052e-35
cholangiocyte	ZNF462	12.8342	1.36475	3.90378e-36	3.84287e-35
cholangiocyte	ZCRB1	12.8287	0.597639	1.94879e-36	1.93414e-35
cholangiocyte	RIPK3	12.8209	3.35231	1.73017e-35	1.67176e-34
cholangiocyte	RNF13	12.8161	0.637512	2.19555e-36	2.17493e-35
cholangiocyte	TSC22D1	12.8161	0.552191	1.87417e-36	1.86125e-35
cholangiocyte	CAPZA2	12.8156	0.468609	1.74616e-36	1.73632e-35
cholangiocyte	RHPN1	12.8003	2.51871	1.55207e-35	1.50151e-34
cholangiocyte	ZBTB38	12.7979	0.580801	2.51124e-36	2.48139e-35
cholangiocyte	ARID4B	12.7918	0.628518	3.4167e-36	3.3655e-35
cholangiocyte	CANT1	12.7705	0.919943	5.64975e-36	5.52011e-35
cholangiocyte	OVOL2	12.7603	1.5779	1.27919e-35	1.24058e-34
cholangiocyte	STK32A	12.7429	3.23448	4.3141e-35	4.10283e-34
cholangiocyte	TFCP2L1	12.7418	2.12366	2.07183e-35	1.99451e-34
cholangiocyte	NRARP	12.7404	1.99968	2.15384e-35	2.0722e-34
cholangiocyte	GJB3	12.739	1.32313	1.00176e-35	9.73325e-35
cholangiocyte	RBPJ	12.7311	0.790739	9.30151e-36	9.06551e-35
cholangiocyte	PSORS1C1	12.7154	1.60189	1.87527e-35	1.80861e-34
cholangiocyte	RTKN2	12.6888	2.25308	4.85271e-35	4.60392e-34
cholangiocyte	NONO	12.6809	0.454389	9.90631e-36	9.63391e-35
cholangiocyte	CGN	12.6801	0.877082	1.37974e-35	1.33644e-34
cholangiocyte	SMAD2	12.6783	0.745852	1.42075e-35	1.37531e-34
cholangiocyte	CKMT1B	12.6601	3.52081	1.21019e-34	1.1358e-33
cholangiocyte	SGK1	12.6577	1.23329	3.16099e-35	3.03004e-34
cholangiocyte	ARFGEF3	12.6502	1.34763	4.22663e-35	4.02452e-34
cholangiocyte	EFNB1	12.6413	1.02824	2.86936e-35	2.75554e-34
cholangiocyte	ATP2C2	12.6341	1.76356	5.91713e-35	5.59014e-34
cholangiocyte	PIK3C2G	12.6273	1.42694	5.4546e-35	5.16248e-34
cholangiocyte	TOMM20	12.6255	0.36134	1.79608e-35	1.73437e-34
cholangiocyte	CXCL1	12.6216	1.28642	3.4849e-35	3.33037e-34
cholangiocyte	SUCLA2	12.6131	0.733677	3.76062e-35	3.58514e-34
cholangiocyte	TRIM16	12.6129	1.02868	4.27971e-35	4.07259e-34
cholangiocyte	PITPNM3	12.6081	1.68927	7.01141e-35	6.60805e-34
cholangiocyte	MNX1	12.6033	3.19179	1.87854e-34	1.75364e-33
cholangiocyte	BNIP3L	12.6006	0.667591	3.28936e-35	3.14732e-34
cholangiocyte	MALT1	12.5971	0.693015	3.22524e-35	3.08974e-34
cholangiocyte	RASSF7	12.5945	0.737197	3.23911e-35	3.10114e-34
cholangiocyte	ATP13A2	12.5942	1.21483	5.50158e-35	5.20068e-34
cholangiocyte	PLAU	12.5869	1.65856	5.49916e-35	5.20068e-34
cholangiocyte	PPFIA1	12.5812	0.71964	4.38205e-35	4.16494e-34
cholangiocyte	ATL1	12.5598	1.52533	1.16849e-34	1.09732e-33
cholangiocyte	B2M	12.559	0.474274	7.8288e-35	7.37399e-34
cholangiocyte	ZNF185	12.5179	2.45057	3.56814e-34	3.29566e-33
cholangiocyte	IRF2BP2	12.5071	0.505671	6.98436e-35	6.58651e-34
cholangiocyte	SERTAD4-AS1	12.5003	3.68196	7.39811e-34	6.75766e-33
cholangiocyte	CCZ1B	12.4926	1.44301	2.21592e-34	2.06246e-33
cholangiocyte	SUSD4	12.4666	2.87833	8.44627e-34	7.70612e-33
cholangiocyte	MFAP1	12.4619	0.650126	1.55393e-34	1.45493e-33
cholangiocyte	DCTN1	12.4555	0.811212	2.01232e-34	1.8763e-33
cholangiocyte	TIMMDC1	12.4543	0.563601	1.60062e-34	1.49687e-33
cholangiocyte	LINC01133	12.4482	3.83597	1.3169e-33	1.18976e-32
cholangiocyte	SH3RF1	12.4477	0.911514	2.5804e-34	2.39461e-33
cholangiocyte	CYTH1	12.4399	1.2142	3.82162e-34	3.5277e-33
cholangiocyte	ONECUT2	12.4377	0.921087	3.01955e-34	2.79718e-33
cholangiocyte	FRYL	12.4364	0.892893	2.97131e-34	2.75412e-33
cholangiocyte	POLR2A	12.4329	0.797157	2.86501e-34	2.65715e-33
cholangiocyte	SNF8	12.431	0.476726	1.7788e-34	1.66152e-33
cholangiocyte	TNPO1	12.425	0.667719	2.5044e-34	2.32545e-33
cholangiocyte	REEP3	12.4205	0.563879	1.91094e-34	1.78282e-33
cholangiocyte	G3BP2	12.4062	0.467689	2.27222e-34	2.11236e-33
cholangiocyte	CLIC3	12.4052	1.80678	7.80719e-34	7.12718e-33
cholangiocyte	RNPEP	12.3996	0.715644	3.19634e-34	2.95572e-33
cholangiocyte	AHCYL2	12.397	1.60293	8.99902e-34	8.19616e-33
cholangiocyte	POLB	12.3858	1.13523	6.81749e-34	6.23455e-33
cholangiocyte	SPTBN1	12.3852	0.426329	2.43981e-34	2.26682e-33
cholangiocyte	ZBTB1	12.3766	0.775412	5.68302e-34	5.2153e-33
cholangiocyte	MMADHC	12.3662	0.487403	4.14791e-34	3.82665e-33
cholangiocyte	WSB2	12.3658	0.690971	5.07538e-34	4.66585e-33
cholangiocyte	UBE2L3	12.3621	0.415239	4.67122e-34	4.30185e-33

## Sheet: S2_Top1000_markers_Hep_Assembl
Supplementary Dataset 3_S2: Top1000 Marker gene list of Hepatocytes in assembloids related to Fig. 4 and Extended Data Fig. 8
group	names	scores	logfoldchanges	pvals	pvals_adj
hepatocyte	ITIH2	90.7201	5.49876	0	0
hepatocyte	ALB	84.559	5.58757	0	0
hepatocyte	VTN	66.907	4.83389	0	0
hepatocyte	CFH	65.0851	3.78733	0	0
hepatocyte	APCS	64.8693	4.8968	0	0
hepatocyte	UGT2B7	64.2578	3.08227	0	0
hepatocyte	ALDOB	62.2252	3.92504	0	0
hepatocyte	IGFBP2	62.0064	4.16792	0	0
hepatocyte	AMBP	61.6244	4.84111	0	0
hepatocyte	ASGR2	61.5543	5.62533	0	0
hepatocyte	QPRT	60.9689	3.21064	0	0
hepatocyte	SERPING1	60.6378	5.11837	0	0
hepatocyte	RBP4	59.7	4.69959	0	0
hepatocyte	APOB	59.5929	4.976	0	0
hepatocyte	ASGR1	57.2711	3.95939	0	0
hepatocyte	APOH	56.359	4.30482	0	0
hepatocyte	FGL1	56.1582	4.40394	0	0
hepatocyte	TFPI	54.7744	2.6767	0	0
hepatocyte	HSD17B2	54.5799	3.01885	0	0
hepatocyte	UGT2B4	54.4719	4.28444	0	0
hepatocyte	SERPINA1	53.3942	3.13473	0	0
hepatocyte	HPN	52.9826	4.62493	0	0
hepatocyte	FMO3	52.4639	5.161	0	0
hepatocyte	CLU	51.3404	3.1903	0	0
hepatocyte	CPB2	50.8697	4.01838	0	0
hepatocyte	HSD17B11	49.0551	2.17998	0	0
hepatocyte	PAH	48.3882	3.87533	0	0
hepatocyte	C8G	47.9471	5.3093	0	0
hepatocyte	MGST1	47.4222	2.38132	0	0
hepatocyte	A1CF	46.8985	2.84777	0	0
hepatocyte	TF	46.896	5.40533	0	0
hepatocyte	BST2	46.6056	3.72125	0	0
hepatocyte	CFI	45.8975	2.85541	0	0
hepatocyte	APOE	45.67	4.00452	0	0
hepatocyte	CP	45.6318	5.07785	8.42716e-306	2.75831e-303
hepatocyte	TTR	45.4574	3.12572	0	0
hepatocyte	TRPM8	45.0782	4.00967	0	0
hepatocyte	ACAA2	44.7752	1.89791	0	0
hepatocyte	PLG	44.5944	5.69479	9.24376e-291	2.64052e-288
hepatocyte	GC	44.5058	3.59286	0	0
hepatocyte	ABCC2	44.4867	2.67724	0	0
hepatocyte	FGB	44.419	4.92225	2.90414e-293	8.60886e-291
hepatocyte	PON1	44.2592	3.45374	0	4.22237e-307
hepatocyte	CYP2E1	44.0716	4.51888	3.65646e-296	1.10474e-293
hepatocyte	CYP2C9	43.9395	4.03396	5.25718e-293	1.52955e-290
hepatocyte	AADAC	43.8593	3.58823	1.30036e-304	4.16937e-302
hepatocyte	C1S	43.3079	4.39931	8.51858e-287	2.30751e-284
hepatocyte	AOX1	43.15	5.0007	5.01617e-282	1.27111e-279
hepatocyte	FGA	42.8138	4.79585	6.39336e-279	1.56947e-276
hepatocyte	AHSG	42.5103	5.15147	3.76141e-273	8.56456e-271
hepatocyte	BHMT2	42.3968	5.36031	6.16671e-273	1.38407e-270
hepatocyte	C8B	42.249	5.69156	5.92313e-269	1.27477e-266
hepatocyte	DEFB1	41.4224	3.43149	2.00118e-274	4.62361e-272
hepatocyte	VNN1	41.2696	3.43098	2.02922e-277	4.90477e-275
hepatocyte	TMEM37	41.2135	1.97803	6.32824e-297	1.94947e-294
hepatocyte	APOM	41.1644	3.82509	7.59405e-267	1.6123e-264
hepatocyte	ERRFI1	40.9039	2.27025	3.99684e-288	1.10166e-285
hepatocyte	PLA2G12B	40.8274	4.53934	4.66808e-266	9.77869e-264
hepatocyte	CYB5A	40.5779	2.01298	1.00601e-285	2.67889e-283
hepatocyte	IFITM3	40.5769	2.14691	1.0263e-289	2.87933e-287
hepatocyte	UGT2B10	40.2995	4.04476	2.92305e-260	5.81317e-258
hepatocyte	AZGP1	40.1378	2.35529	2.27339e-282	5.85529e-280
hepatocyte	RARRES2	39.8334	3.21323	3.73554e-262	7.52425e-260
hepatocyte	ORM2	39.7092	5.21863	9.74981e-247	1.84553e-244
hepatocyte	ODAM	39.6342	2.82401	4.14415e-275	9.71772e-273
hepatocyte	SERPINF1	39.5738	2.81259	3.46479e-277	8.24778e-275
hepatocyte	DBI	39.053	1.39366	3.94082e-271	8.72031e-269
hepatocyte	APOA1	39.0019	4.54025	5.80698e-242	1.02509e-239
hepatocyte	CBR1	38.9398	1.63564	9.22803e-270	2.01363e-267
hepatocyte	CYP1A1	38.8583	4.48836	1.52251e-242	2.74945e-240
hepatocyte	RBP5	38.8438	5.04328	1.23468e-240	2.13165e-238
hepatocyte	GATM	38.7863	2.55486	1.04501e-264	2.13223e-262
hepatocyte	PDZK1	38.4246	3.62522	8.98757e-246	1.681e-243
hepatocyte	SERPIND1	38.3455	5.09986	2.50106e-237	4.18022e-235
hepatocyte	SLC2A2	38.0767	4.00541	8.06906e-238	1.37797e-235
hepatocyte	FUOM	37.2788	2.41851	2.94437e-247	5.64135e-245
hepatocyte	TM4SF5	37.2264	2.49381	2.54328e-245	4.70088e-243
hepatocyte	ONECUT1	37.1723	6.03627	7.12383e-223	1.03632e-220
hepatocyte	MTTP	37.1446	5.0521	1.99368e-225	2.92735e-223
hepatocyte	SHMT1	36.6561	3.05876	1.16959e-231	1.8561e-229
hepatocyte	ORM1	36.2082	4.51589	6.59902e-216	9.09449e-214
hepatocyte	AIG1	36.1417	1.41603	1.2639e-236	2.09023e-234
hepatocyte	SDC2	36.1222	1.94725	1.35308e-237	2.28584e-235
hepatocyte	C5	36.1072	3.75501	1.68008e-219	2.35676e-217
hepatocyte	FGGY	36.0432	2.40316	3.4012e-230	5.23885e-228
hepatocyte	ALDH1A1	35.9695	2.12854	6.81137e-235	1.10323e-232
hepatocyte	PRAP1	35.8646	2.4672	9.3782e-236	1.5348e-233
hepatocyte	GAMT	35.8025	1.83766	1.88233e-233	3.01769e-231
hepatocyte	AK4	35.622	2.25261	1.165e-230	1.83034e-228
hepatocyte	ACMSD	35.3113	2.43066	1.87375e-227	2.80367e-225
hepatocyte	PEBP1	34.9199	1.03041	3.84207e-226	5.6946e-224
hepatocyte	ITIH5	34.8401	4.6455	8.33806e-205	1.07376e-202
hepatocyte	ACSS3	34.782	4.13439	1.3335e-208	1.76056e-206
hepatocyte	AR	34.6302	3.62196	4.94779e-209	6.58769e-207
hepatocyte	C11orf54	34.6154	2.05617	1.4144e-219	2.00442e-217
hepatocyte	AGT	34.6053	2.27802	1.06664e-222	1.53742e-220
hepatocyte	RASSF4	34.2973	2.44873	1.34366e-212	1.81985e-210
hepatocyte	HHEX	34.174	2.37672	1.06628e-214	1.45672e-212
hepatocyte	ALDH8A1	34.0215	5.38294	1.18161e-195	1.38539e-193
hepatocyte	PROC	33.9779	2.31894	5.6794e-212	7.62641e-210
hepatocyte	CYP27A1	33.8304	3.15355	5.72992e-204	7.25991e-202
hepatocyte	GOLT1A	33.7739	2.81126	1.04939e-204	1.3404e-202
hepatocyte	APOC1	33.3749	4.37311	2.22598e-190	2.46285e-188
hepatocyte	ST6GAL1	33.3299	2.10993	1.44715e-206	1.87902e-204
hepatocyte	NEU4	33.143	4.91031	7.24941e-189	7.69564e-187
hepatocyte	HAO1	33.0843	4.6584	4.42694e-189	4.73141e-187
hepatocyte	FGG	32.9138	4.79306	2.48857e-186	2.60652e-184
hepatocyte	PROS1	32.9067	1.61387	1.17629e-203	1.47846e-201
hepatocyte	CRYL1	32.8182	1.76241	5.36162e-203	6.68543e-201
hepatocyte	STARD10	32.8125	1.53103	1.25363e-200	1.51506e-198
hepatocyte	ABCB1	32.7958	2.25749	2.32405e-200	2.78727e-198
hepatocyte	KHK	32.7202	2.84029	3.30118e-194	3.8136e-192
hepatocyte	CYP2C8	32.5226	4.29387	9.07978e-184	9.14438e-182
hepatocyte	BCHE	32.4291	4.99605	3.71655e-182	3.67237e-180
hepatocyte	ADH4	32.3317	3.39015	2.96548e-186	3.08547e-184
hepatocyte	C1R	32.2956	3.94457	1.56966e-182	1.57076e-180
hepatocyte	EVA1A	32.1686	1.85973	3.14739e-195	3.66286e-193
hepatocyte	SPP1	31.9049	3.00562	1.13725e-189	1.23223e-187
hepatocyte	PROX1	31.7763	2.32061	7.61537e-190	8.30869e-188
hepatocyte	FCGRT	31.7602	1.42981	8.57052e-191	9.68716e-189
hepatocyte	GHR	31.703	4.64489	2.86901e-176	2.60549e-174
hepatocyte	AFM	31.6117	5.31716	2.31308e-173	2.03022e-171
hepatocyte	HNMT	31.5949	1.39124	1.70408e-190	1.89878e-188
hepatocyte	CAT	31.5042	1.51934	1.8762e-189	2.01897e-187
hepatocyte	SEPHS2	31.0364	1.22078	1.4275e-184	1.45633e-182
hepatocyte	NNMT	31.0287	1.91556	1.12594e-184	1.15618e-182
hepatocyte	ABCC3	30.9994	1.28586	2.73527e-181	2.66918e-179
hepatocyte	LRG1	30.7715	2.77686	1.63609e-173	1.44408e-171
hepatocyte	GDA	30.7035	2.2677	1.01644e-178	9.56244e-177
hepatocyte	HNF4A	30.6952	1.74722	8.51573e-181	8.20802e-179
hepatocyte	CYP4F2	30.5994	3.90221	7.11658e-169	5.82337e-167
hepatocyte	GGH	30.5153	1.93438	2.54552e-178	2.38051e-176
hepatocyte	HSPD1	30.3825	0.949649	3.87989e-177	3.56473e-175
hepatocyte	C4BPA	30.0409	3.18993	1.31351e-165	1.03701e-163
hepatocyte	ECHDC3	30.0098	2.66328	9.10162e-169	7.4091e-167
hepatocyte	TFR2	29.9722	5.23951	8.84099e-160	6.55192e-158
hepatocyte	DPYS	29.9093	5.01338	5.71222e-160	4.27356e-158
hepatocyte	CFHR1	29.8839	5.23204	1.21037e-158	8.84468e-157
hepatocyte	IFITM2	29.8703	2.14984	6.16525e-171	5.20764e-169
hepatocyte	SOD2	29.729	1.54704	4.98063e-171	4.25275e-169
hepatocyte	PGM1	29.6995	1.62272	1.05147e-170	8.83402e-169
hepatocyte	MPST	29.5553	1.06912	6.28172e-169	5.19432e-167
hepatocyte	CITED4	29.4876	1.57886	6.42556e-169	5.28544e-167
hepatocyte	A2M	29.3934	3.10355	1.04816e-160	7.91711e-159
hepatocyte	FBP1	29.3213	1.96385	2.85693e-167	2.29006e-165
hepatocyte	EBP	29.0572	1.29856	3.19547e-163	2.48535e-161
hepatocyte	RGN	29.0531	3.07166	9.70792e-158	7.06117e-156
hepatocyte	APOC2	29.0394	5.69309	1.42513e-151	9.82026e-150
hepatocyte	ANG	29.0212	2.01298	6.73535e-161	5.11203e-159
hepatocyte	SULT1B1	29.0167	2.53228	4.44741e-160	3.34322e-158
hepatocyte	GPX3	28.8838	2.64961	1.49912e-156	1.0804e-154
hepatocyte	ITIH4	28.8718	4.9609	5.74541e-151	3.94175e-149
hepatocyte	ALDH4A1	28.8438	2.23368	3.0646e-159	2.2499e-157
hepatocyte	CYP4A11	28.7677	5.2078	2.87028e-149	1.88682e-147
hepatocyte	SPINK1	28.7612	1.81128	1.23659e-161	9.47708e-160
hepatocyte	GALK1	28.7376	1.79195	5.79568e-160	4.31544e-158
hepatocyte	CYP4F3	28.664	2.03921	1.83429e-159	1.35299e-157
hepatocyte	PIPOX	28.6432	5.45295	2.39301e-148	1.54085e-146
hepatocyte	NR1H4	28.6235	2.85637	1.86631e-155	1.32677e-153
hepatocyte	DIO1	28.4312	3.61416	4.02233e-150	2.68914e-148
hepatocyte	TGM2	28.2996	2.32518	1.41731e-153	9.98533e-152
hepatocyte	FN1	28.2932	2.07244	2.00396e-150	1.34548e-148
hepatocyte	GJB1	28.2893	1.60216	5.30976e-157	3.84431e-155
hepatocyte	SMLR1	28.0996	4.11127	3.39137e-145	2.13127e-143
hepatocyte	ABCA6	28.0622	3.5805	4.52142e-147	2.88765e-145
hepatocyte	CDK5RAP2	28.0271	1.60287	2.64187e-153	1.84473e-151
hepatocyte	FAXDC2	27.9353	2.38963	7.94261e-151	5.40201e-149
hepatocyte	FABP1	27.9007	4.17801	1.9338e-142	1.16854e-140
hepatocyte	RBKS	27.8407	2.16912	6.60326e-150	4.35898e-148
hepatocyte	NAT8	27.8374	5.14157	6.64653e-142	3.95544e-140
hepatocyte	PBLD	27.586	1.63256	4.44846e-150	2.94894e-148
hepatocyte	GOT1	27.5269	1.61616	8.31514e-149	5.39831e-147
hepatocyte	TMEM156	27.3814	3.22711	3.17994e-142	1.89962e-140
hepatocyte	UGT1A1	27.3724	4.08293	9.89696e-139	5.75893e-137
hepatocyte	SERPINA10	27.349	4.44672	1.15734e-139	6.7847e-138
hepatocyte	ETFB	27.3249	0.860809	1.15469e-143	7.11423e-142
hepatocyte	HP	27.2638	3.75746	2.26014e-137	1.29124e-135
hepatocyte	SALL1	27.1589	2.89018	2.83937e-141	1.67704e-139
hepatocyte	CYP2C18	27.1446	1.77189	1.37969e-145	8.74043e-144
hepatocyte	CFHR2	27.1124	5.47227	5.38289e-135	3.02038e-133
hepatocyte	C8A	27.1007	2.52652	1.15255e-142	6.99138e-141
hepatocyte	HPD	26.9765	4.76495	2.17032e-134	1.20487e-132
hepatocyte	ECI1	26.9646	1.17985	4.59034e-144	2.83933e-142
hepatocyte	GPD1	26.9519	2.883	4.11285e-139	2.40212e-137
hepatocyte	APOC3	26.7895	3.78013	1.23248e-133	6.74687e-132
hepatocyte	CEBPD	26.772	1.50658	2.66146e-142	1.60208e-140
hepatocyte	MIR99AHG	26.7682	4.74277	2.8537e-133	1.55137e-131
hepatocyte	FXYD2	26.6806	1.83164	2.56155e-141	1.51866e-139
hepatocyte	CES2	26.5819	1.58409	1.20918e-140	7.11514e-139
hepatocyte	ANPEP	26.3653	1.87656	1.45971e-138	8.46257e-137
hepatocyte	TKFC	26.3635	2.07236	2.05011e-135	1.15446e-133
hepatocyte	FMO5	26.3379	2.18678	1.44158e-135	8.14702e-134
hepatocyte	MAOA	26.3036	1.84199	2.19171e-137	1.25671e-135
hepatocyte	LEAP2	26.2768	3.48708	3.88104e-130	1.99265e-128
hepatocyte	BNIP3	26.2748	1.48359	9.22864e-138	5.31103e-136
hepatocyte	CRP	26.2088	4.3124	3.45689e-128	1.70255e-126
hepatocyte	AGXT2	26.0479	5.04817	4.33424e-127	2.1017e-125
hepatocyte	ECH1	26.02	1.06029	1.16191e-134	6.49633e-133
hepatocyte	PRG4	25.8866	5.34241	2.89929e-125	1.38452e-123
hepatocyte	CEBPA	25.7257	3.14107	2.60467e-126	1.25144e-124
hepatocyte	ECHS1	25.7162	0.899894	1.57854e-132	8.49333e-131
hepatocyte	SUSD3	25.6919	5.2068	2.19089e-124	1.03678e-122
hepatocyte	AGMAT	25.6819	2.16402	6.61295e-131	3.42892e-129
hepatocyte	MGST2	25.5996	1.04728	3.21622e-131	1.69564e-129
hepatocyte	PRODH2	25.5598	4.77481	9.13948e-123	4.19855e-121
hepatocyte	AFP	25.5071	3.81435	5.35633e-124	2.51956e-122
hepatocyte	SAA4	25.4708	4.80005	4.31253e-122	1.96389e-120
hepatocyte	NPW	25.4151	2.25329	8.35538e-127	4.02673e-125
hepatocyte	ACAT1	25.4007	1.45856	1.08764e-128	5.47688e-127
hepatocyte	MAT1A	25.3192	5.22103	8.95212e-121	3.98433e-119
hepatocyte	C4BPB	25.2654	2.02115	4.39437e-127	2.12431e-125
hepatocyte	DDT	25.0076	1.23218	5.52931e-125	2.63246e-123
hepatocyte	EREG	24.9942	1.60118	7.48437e-126	3.58497e-124
hepatocyte	APOA2	24.897	3.36669	1.61724e-118	6.98033e-117
hepatocyte	CHST9	24.88	4.207	2.56122e-118	1.09944e-116
hepatocyte	MBNL3	24.8389	2.29307	8.26528e-122	3.74224e-120
hepatocyte	DAB1	24.8237	3.71663	1.22932e-118	5.35011e-117
hepatocyte	CYP3A5	24.7911	1.64422	4.7085e-124	2.22148e-122
hepatocyte	IQGAP2	24.7904	1.62195	9.88502e-124	4.60841e-122
hepatocyte	SLC30A10	24.6411	3.26167	5.72776e-118	2.44535e-116
hepatocyte	AKR1C4	24.5764	2.92906	3.28053e-117	1.38549e-115
hepatocyte	PNRC1	24.5339	1.09891	8.55331e-122	3.86152e-120
hepatocyte	ENTPD5	24.5317	1.71159	4.01666e-121	1.80302e-119
hepatocyte	ALDH3A2	24.5256	1.24344	5.4494e-121	2.43919e-119
hepatocyte	SPP2	24.3263	4.88499	8.66118e-113	3.40189e-111
hepatocyte	HAAO	24.3032	4.11799	1.17884e-113	4.73678e-112
hepatocyte	ETFA	24.2646	0.882051	2.62923e-119	1.15064e-117
hepatocyte	MST1	24.2524	3.83036	2.38702e-113	9.54261e-112
hepatocyte	AKR1C2	24.25	1.51681	2.92395e-119	1.27606e-117
hepatocyte	PCSK1N	24.1258	1.48419	4.10403e-118	1.7569e-116
hepatocyte	FST	24.1091	3.0116	6.33844e-114	2.55998e-112
hepatocyte	BBOX1	23.971	3.95706	2.1868e-111	8.44148e-110
hepatocyte	PKLR	23.9593	4.42003	1.31974e-110	5.04489e-109
hepatocyte	DNPH1	23.8364	1.04158	2.07286e-115	8.5477e-114
hepatocyte	HSDL2	23.7936	1.18736	3.33869e-115	1.37314e-113
hepatocyte	EHHADH	23.7826	2.20456	5.68754e-113	2.2508e-111
hepatocyte	LINC01485	23.7545	3.71464	4.23372e-110	1.6028e-108
hepatocyte	HYAL1	23.7503	2.58235	5.68969e-112	2.21264e-110
hepatocyte	XBP1	23.6776	1.01419	5.46164e-114	2.21154e-112
hepatocyte	CNTNAP2	23.6513	2.71463	2.28383e-111	8.79442e-110
hepatocyte	ADH6	23.6132	1.9039	5.94002e-113	2.34482e-111
hepatocyte	GPX2	23.5929	1.70121	1.58288e-111	6.12528e-110
hepatocyte	PEPD	23.5312	1.17254	6.67196e-113	2.62715e-111
hepatocyte	SERPINF2	23.3446	4.06329	5.93843e-106	2.07792e-104
hepatocyte	SLC37A4	23.3236	1.57679	1.30416e-110	4.99746e-109
hepatocyte	EML4	23.2885	1.32686	2.79123e-110	1.05925e-108
hepatocyte	KIF12	23.2037	1.90134	6.53087e-109	2.4086e-107
hepatocyte	NAT2	23.0965	3.49577	9.56838e-105	3.28947e-103
hepatocyte	FAH	23.0588	1.5289	3.30951e-108	1.19256e-106
hepatocyte	PPP1R16A	23.0535	1.35371	1.45018e-108	5.29855e-107
hepatocyte	EEF1B2	23.0532	0.545988	1.88986e-108	6.87305e-107
hepatocyte	KRT23	23.0424	1.78405	2.58544e-108	9.35941e-107
hepatocyte	MSRB2	23.0165	0.860797	2.02356e-108	7.34228e-107
hepatocyte	TM4SF4	23.012	1.35199	1.53357e-105	5.33052e-104
hepatocyte	TMEM97	23.0086	1.77736	2.04446e-107	7.2671e-106
hepatocyte	RPL34	22.9566	0.677875	5.66022e-108	2.03031e-106
hepatocyte	ARHGEF26	22.881	2.22282	3.15391e-105	1.08903e-103
hepatocyte	LACTB2	22.867	0.972648	3.88674e-107	1.37843e-105
hepatocyte	CHDH	22.831	1.31032	7.1296e-107	2.5115e-105
hepatocyte	SULT1E1	22.8038	2.13381	1.7185e-105	5.96013e-104
hepatocyte	ID2	22.739	1.13932	4.21375e-106	1.47773e-104
hepatocyte	ANGPTL3	22.7334	4.83197	1.66533e-100	5.32872e-99
hepatocyte	ACOX2	22.7083	3.87784	2.66682e-101	8.63885e-100
hepatocyte	SERPINA6	22.6418	1.74119	4.72303e-105	1.62727e-103
hepatocyte	ITIH3	22.6046	5.45265	2.85222e-99	8.89111e-98
hepatocyte	SLCO1B1	22.5655	3.77077	1.01349e-99	3.19098e-98
hepatocyte	EPHX2	22.4801	2.05132	5.73367e-103	1.91663e-101
hepatocyte	NEB	22.4588	1.57512	1.43706e-103	4.87637e-102
hepatocyte	GLDC	22.4562	1.83192	9.50249e-103	3.14966e-101
hepatocyte	CUX2	22.3691	5.20665	1.09094e-97	3.3281e-96
hepatocyte	OTC	22.2325	2.63816	1.39393e-99	4.38001e-98
hepatocyte	POR	22.1973	1.11452	1.72257e-101	5.62647e-100
hepatocyte	CDO1	22.1825	5.03514	1.62055e-96	4.84963e-95
hepatocyte	C1orf115	22.1489	1.80853	1.24239e-100	3.99165e-99
hepatocyte	FOS	22.113	1.40515	8.03335e-101	2.58631e-99
hepatocyte	RPL23A	22.0552	0.555145	2.72243e-100	8.69352e-99
hepatocyte	MTUS1	22.0277	1.52963	5.54915e-100	1.76127e-98
hepatocyte	PRLR	21.9354	4.31853	5.97169e-95	1.74065e-93
hepatocyte	BDH1	21.7391	2.13812	2.77474e-96	8.27209e-95
hepatocyte	PTGR1	21.6107	1.16733	1.34171e-96	4.02283e-95
hepatocyte	SERPINA5	21.4116	1.53911	5.21598e-95	1.52604e-93
hepatocyte	IL17RB	21.3964	2.46194	1.0841e-92	3.04147e-91
hepatocyte	FNDC4	21.372	1.26149	1.06622e-94	3.08498e-93
hepatocyte	CES1	21.3336	5.14903	3.88641e-90	1.04554e-88
hepatocyte	GSTO1	21.2953	0.685532	1.45512e-93	4.15663e-92
hepatocyte	ACSM5	21.2813	6.65803	2.66407e-89	7.07013e-88
hepatocyte	C2orf72	21.2531	2.37544	3.25144e-92	9.04129e-91
hepatocyte	ACSL4	21.1761	1.50624	2.58274e-91	7.05695e-90
hepatocyte	NIPSNAP1	21.1449	1.10407	6.59628e-93	1.86058e-91
hepatocyte	SAA1	21.1318	3.30825	2.54855e-89	6.77499e-88
hepatocyte	AGTR1	21.1052	4.41105	1.32191e-88	3.47882e-87
hepatocyte	ABCA1	21.0836	2.04227	1.54936e-91	4.24816e-90
hepatocyte	STEAP3	21.0584	1.46952	5.03664e-92	1.39807e-90
hepatocyte	RPS18	21.0275	0.448144	1.2665e-91	3.47866e-90
hepatocyte	KNG1	21.0252	5.58642	1.85484e-87	4.8088e-86
hepatocyte	ECHDC2	20.9966	1.1201	1.00996e-91	2.7789e-90
hepatocyte	CYP8B1	20.7729	5.09156	6.38359e-86	1.61502e-84
hepatocyte	SLC17A4	20.7571	2.3312	1.88129e-88	4.94264e-87
hepatocyte	TMEM176B	20.7545	1.99537	5.9959e-89	1.58056e-87
hepatocyte	FTCD	20.5785	3.85143	1.05849e-85	2.67362e-84
hepatocyte	ADIRF	20.5303	1.61736	1.68895e-87	4.38597e-86
hepatocyte	FAM169A	20.5258	2.28653	2.749e-86	6.97731e-85
hepatocyte	GIPC2	20.5177	1.63021	1.48568e-87	3.86448e-86
hepatocyte	TMEM220	20.5116	1.6041	1.46647e-87	3.82084e-86
hepatocyte	UGT2A3	20.4627	1.27814	3.96267e-87	1.01728e-85
hepatocyte	TMEM82	20.4516	4.04967	3.62991e-84	8.93879e-83
hepatocyte	ALDH1L1	20.417	3.47513	1.78907e-84	4.43345e-83
hepatocyte	ACSM2B	20.3723	5.96601	9.2261e-83	2.20291e-81
hepatocyte	DNAJC12	20.3385	1.80934	1.14281e-85	2.88198e-84
hepatocyte	ARG1	20.3327	4.78087	1.17074e-82	2.79113e-81
hepatocyte	TDO2	20.2511	2.90278	2.03658e-84	5.03094e-83
hepatocyte	HMGCS2	20.2467	2.34304	1.86862e-84	4.62329e-83
hepatocyte	GRIA3	20.2162	2.91803	1.01388e-83	2.47346e-82
hepatocyte	SLC39A5	20.2071	1.80679	4.21128e-85	1.05188e-83
hepatocyte	HSD17B6	20.157	5.38007	2.74456e-81	6.33183e-80
hepatocyte	SOD1	20.1339	0.550493	9.92244e-85	2.46274e-83
hepatocyte	ATF5	20.1303	1.4808	4.05367e-84	9.96669e-83
hepatocyte	ART4	20.1058	4.80535	1.55405e-81	3.60645e-80
hepatocyte	SULT2A1	20.0832	6.14155	1.33218e-80	3.00716e-79
hepatocyte	LIPC	20.0404	2.55303	8.20301e-83	1.9646e-81
hepatocyte	UNC93A	20.0373	4.18899	3.61971e-81	8.3264e-80
hepatocyte	TNFSF10	20.0339	1.24875	4.11983e-84	1.01135e-82
hepatocyte	AQP3	20.0199	1.15117	8.09421e-84	1.97773e-82
hepatocyte	ACSM2A	20.0193	5.69702	3.15504e-80	7.07117e-79
hepatocyte	OAF	19.9885	1.46342	2.05845e-83	4.97543e-82
hepatocyte	HINT1	19.9272	0.420524	2.31906e-82	5.46249e-81
hepatocyte	GPC6	19.906	2.32186	3.3929e-82	7.97992e-81
hepatocyte	MLXIPL	19.8799	1.61814	1.53123e-82	3.62732e-81
hepatocyte	SERPINA7	19.8715	5.71597	3.15456e-79	6.94137e-78
hepatocyte	NFIC	19.8478	0.778467	1.31753e-82	3.13632e-81
hepatocyte	SCD	19.8436	1.15239	1.53303e-82	3.62732e-81
hepatocyte	ARHGAP29	19.7638	1.40087	5.88463e-82	1.38196e-80
hepatocyte	CCL20	19.7633	2.07915	8.82612e-82	2.06043e-80
hepatocyte	TTPA	19.7595	4.73669	8.59938e-79	1.87385e-77
hepatocyte	KRTCAP3	19.7394	1.18818	7.37347e-82	1.72645e-80
hepatocyte	EBPL	19.7164	0.856484	1.13495e-81	2.63776e-80
hepatocyte	SAT1	19.6986	0.874901	5.06434e-81	1.15985e-79
hepatocyte	RPL37	19.6731	0.60849	2.30111e-81	5.32442e-80
hepatocyte	RPS8	19.6102	0.557606	6.98219e-81	1.59444e-79
hepatocyte	SMCO4	19.6081	1.24577	9.2596e-81	2.10837e-79
hepatocyte	LDLRAD4	19.5913	2.59712	1.98571e-79	4.4002e-78
hepatocyte	RPL11	19.5726	0.401409	2.62607e-80	5.90246e-79
hepatocyte	GLUD1	19.5467	0.970023	3.07385e-80	6.89905e-79
hepatocyte	PRKAA2	19.526	1.24133	3.53769e-80	7.91747e-79
hepatocyte	ERBB3	19.4231	0.935688	3.0911e-79	6.82083e-78
hepatocyte	SLC22A18	19.4024	0.990822	4.70581e-79	1.02971e-77
hepatocyte	NFIB	19.3921	1.08943	3.11083e-79	6.85474e-78
hepatocyte	SLC27A2	19.3733	1.95058	2.68781e-78	5.77678e-77
hepatocyte	TMEM150C	19.3553	3.48541	1.10956e-76	2.31812e-75
hepatocyte	IDH1	19.2967	0.849962	1.62568e-78	3.52776e-77
hepatocyte	TMEM176A	19.2555	1.96755	2.10849e-77	4.48261e-76
hepatocyte	H6PD	19.2512	1.49338	9.10562e-78	1.94637e-76
hepatocyte	ABAT	19.2489	1.56076	9.86519e-78	2.10301e-76
hepatocyte	GALNT18	19.2264	1.89761	3.2993e-77	6.98588e-76
hepatocyte	TMPRSS6	19.211	4.7861	6.67683e-75	1.35354e-73
hepatocyte	GPAM	19.2106	1.51579	2.1923e-77	4.6545e-76
hepatocyte	SLC22A1	19.1988	4.69411	8.72671e-75	1.76002e-73
hepatocyte	NFIA	19.1058	0.968893	4.65551e-77	9.81781e-76
hepatocyte	PON3	19.0854	1.06048	9.32643e-77	1.95631e-75
hepatocyte	REEP6	19.0495	1.23939	1.41171e-76	2.94155e-75
hepatocyte	CREB3L3	19.0207	3.99061	9.08038e-74	1.78774e-72
hepatocyte	FKBP11	19.0123	1.30285	2.45187e-76	5.08196e-75
hepatocyte	PID1	18.9445	2.40144	6.84401e-75	1.38565e-73
hepatocyte	AFF3	18.9333	4.84842	5.04113e-73	9.76586e-72
hepatocyte	GLTPD2	18.9159	2.94807	4.76397e-74	9.46228e-73
hepatocyte	MPDZ	18.8856	1.90227	4.27985e-75	8.70994e-74
hepatocyte	MOGAT3	18.869	3.19305	1.85836e-73	3.63595e-72
hepatocyte	ALDH6A1	18.8635	1.69777	1.12111e-74	2.24952e-73
hepatocyte	SNX10	18.8523	5.04906	2.33017e-72	4.42677e-71
hepatocyte	LINC00261	18.8467	2.25126	3.21436e-74	6.41688e-73
hepatocyte	RELN	18.8194	4.44335	3.01128e-72	5.70003e-71
hepatocyte	KCNK17	18.7799	3.88325	3.97399e-72	7.50426e-71
hepatocyte	SERPINE2	18.7596	1.14163	2.17298e-74	4.34348e-73
hepatocyte	SLC43A1	18.66	1.89595	3.34469e-73	6.51158e-72
hepatocyte	LIN7A	18.6502	1.6491	1.3482e-73	2.64439e-72
hepatocyte	CXCL2	18.6388	1.66129	1.75219e-73	3.4325e-72
hepatocyte	TPRG1-AS1	18.6302	3.65373	1.85726e-71	3.44502e-70
hepatocyte	CD302	18.6199	1.90891	9.8964e-73	1.90542e-71
hepatocyte	ITIH1	18.564	4.99662	1.80909e-70	3.27449e-69
hepatocyte	CLDN1	18.522	0.984232	1.63403e-72	3.12314e-71
hepatocyte	RPS23	18.4933	0.41927	1.773e-72	3.38464e-71
hepatocyte	RPS16	18.4703	0.463431	2.12303e-72	4.03812e-71
hepatocyte	TRPV4	18.4454	1.90287	1.20465e-71	2.24511e-70
hepatocyte	RPL26	18.4451	0.503994	3.81755e-72	7.21751e-71
hepatocyte	SLC47A1	18.4218	5.06617	2.17598e-69	3.8542e-68
hepatocyte	CERS4	18.4187	3.83754	3.71975e-70	6.67898e-69
hepatocyte	AKR1B10	18.3918	1.50272	8.42988e-72	1.57481e-70
hepatocyte	GCNT2	18.2821	3.29823	3.0411e-69	5.3684e-68
hepatocyte	CRYZ	18.2457	0.891793	8.68837e-71	1.58724e-69
hepatocyte	AKR1A1	18.2438	0.619477	1.31685e-70	2.3918e-69
hepatocyte	DNAJC22	18.2388	0.910492	1.00937e-70	1.84183e-69
hepatocyte	PRDX2	18.2175	0.531184	1.94748e-69	3.45338e-68
hepatocyte	RPL32	18.1993	0.427029	2.09555e-70	3.78863e-69
hepatocyte	SERPINC1	18.1987	5.24124	7.82286e-68	1.34322e-66
hepatocyte	RPS14	18.1447	0.397888	5.25024e-70	9.41627e-69
hepatocyte	SLC1A1	18.1439	1.15364	6.08507e-70	1.08887e-68
hepatocyte	APOL6	18.1432	1.3269	5.26097e-70	9.42475e-69
hepatocyte	RPL39	18.1073	0.497291	8.61556e-70	1.53817e-68
hepatocyte	LYPLAL1	18.0789	0.97806	1.38923e-69	2.47182e-68
hepatocyte	ABCG8	18.0625	4.52439	2.82916e-67	4.8157e-66
hepatocyte	GRB14	18.0207	1.52049	5.28309e-69	9.28192e-68
hepatocyte	SORBS2	18.004	0.985201	4.73208e-69	8.32539e-68
hepatocyte	SULF2	17.9891	0.953186	6.09865e-69	1.06818e-67
hepatocyte	SLC7A2	17.9886	2.33751	3.78502e-68	6.52044e-67
hepatocyte	PPP1R1C	17.9773	1.70543	1.87559e-68	3.25607e-67
hepatocyte	PNPO	17.9343	1.14385	1.71537e-68	2.98451e-67
hepatocyte	EGR1	17.9028	1.35475	3.2454e-68	5.60313e-67
hepatocyte	IDNK	17.8652	1.55336	9.27375e-68	1.59061e-66
hepatocyte	SLC22A7	17.8553	5.34196	1.47675e-65	2.39187e-64
hepatocyte	RHOB	17.82	0.743463	1.25314e-67	2.14467e-66
hepatocyte	KLB	17.8058	4.41995	1.22239e-65	1.98604e-64
hepatocyte	PHYHD1	17.7936	2.90852	2.70126e-66	4.48147e-65
hepatocyte	KYNU	17.7572	1.16055	2.64285e-67	4.50344e-66
hepatocyte	CHST13	17.7203	5.30432	9.24497e-65	1.48363e-63
hepatocyte	RPL30	17.6753	0.394502	1.16418e-66	1.95202e-65
hepatocyte	SGMS1	17.6715	1.19469	1.54015e-66	2.56872e-65
hepatocyte	SLC23A1	17.6654	3.04482	3.43511e-65	5.54096e-64
hepatocyte	MAOB	17.6613	0.959746	1.28302e-66	2.1467e-65
hepatocyte	PXMP2	17.6049	1.03906	3.06232e-66	5.07512e-65
hepatocyte	LPGAT1	17.5937	0.907075	4.05173e-66	6.67261e-65
hepatocyte	APOC4-APOC2	17.5217	6.399	2.23112e-63	3.48787e-62
hepatocyte	GGCX	17.5206	0.964103	1.22018e-65	1.9845e-64
hepatocyte	SCGN	17.511	3.60729	8.36846e-64	1.31609e-62
hepatocyte	LBP	17.4598	4.58922	3.85157e-63	5.97945e-62
hepatocyte	ESPN	17.4423	2.70983	5.89751e-64	9.32151e-63
hepatocyte	DEPDC7	17.4204	2.50906	4.64623e-64	7.35115e-63
hepatocyte	TTC38	17.332	1.26556	2.88551e-64	4.59314e-63
hepatocyte	BICC1	17.2976	0.845615	6.11874e-64	9.66146e-63
hepatocyte	CADM1	17.2539	1.17006	8.22058e-64	1.29412e-62
hepatocyte	MMD	17.2513	1.37829	1.41974e-63	2.2261e-62
hepatocyte	KLHL5	17.2128	0.895202	1.58807e-63	2.48508e-62
hepatocyte	ASS1	17.1891	1.14113	2.71958e-63	4.23883e-62
hepatocyte	PIK3AP1	17.1584	1.71688	9.99299e-63	1.5332e-61
hepatocyte	RPS29	17.1564	0.510348	3.93009e-63	6.09532e-62
hepatocyte	ABCB4	17.138	4.43022	3.9553e-61	5.81155e-60
hepatocyte	PECR	17.1005	1.23549	1.14048e-62	1.7481e-61
hepatocyte	TPD52L1	17.0939	0.969002	1.61492e-62	2.4681e-61
hepatocyte	TST	17.0924	0.800197	4.71241e-62	7.11208e-61
hepatocyte	RPS27A	17.0564	0.344207	1.98277e-62	3.02146e-61
hepatocyte	MBNL2	17.0488	0.987042	2.19628e-62	3.34358e-61
hepatocyte	VAMP5	17.0408	1.12673	2.415e-62	3.66945e-61
hepatocyte	ALDH2	17.003	0.849249	8.04118e-62	1.20434e-60
hepatocyte	IL6ST	16.9984	0.79409	4.53001e-62	6.84995e-61
hepatocyte	ERICH5	16.9372	1.94869	3.72284e-61	5.48168e-60
hepatocyte	RPL24	16.9349	0.367414	1.35223e-61	2.00802e-60
hepatocyte	CGNL1	16.9299	3.02415	2.66288e-60	3.85234e-59
hepatocyte	INHBE	16.9277	5.06803	1.2737e-59	1.81589e-58
hepatocyte	RDX	16.9103	0.673627	2.01373e-61	2.98188e-60
hepatocyte	PLCXD3	16.905	3.57626	4.8968e-60	7.0711e-59
hepatocyte	UPB1	16.8811	5.13118	2.08122e-59	2.95109e-58
hepatocyte	PALM3	16.8608	1.88796	1.27123e-60	1.84757e-59
hepatocyte	ANGPTL8	16.8574	4.84505	3.97843e-59	5.60082e-58
hepatocyte	LINC00844	16.8449	4.82541	3.55497e-59	5.01366e-58
hepatocyte	DHRS4	16.841	1.35581	8.26841e-61	1.20954e-59
hepatocyte	CRIP3	16.8394	2.96541	6.47754e-60	9.33658e-59
hepatocyte	CLRN3	16.8239	1.15637	6.91381e-61	1.01233e-59
hepatocyte	NR1I2	16.782	2.5538	8.47355e-60	1.21801e-58
hepatocyte	HLF	16.7577	2.86284	1.09173e-59	1.56355e-58
hepatocyte	TSTD1	16.7531	0.931904	2.10455e-60	3.04742e-59
hepatocyte	SORBS1	16.7379	2.10985	7.15721e-60	1.02973e-58
hepatocyte	PLIN5	16.7308	4.45861	1.44082e-58	2.00503e-57
hepatocyte	PAX8	16.7167	2.18029	1.703e-59	2.42353e-58
hepatocyte	PNPLA3	16.7022	2.05782	1.31495e-59	1.873e-58
hepatocyte	AKR1D1	16.676	4.66851	4.21505e-58	5.79883e-57
hepatocyte	MT1G	16.6694	3.62231	3.73502e-58	5.15197e-57
hepatocyte	RPL41	16.6476	0.421684	1.06242e-59	1.52296e-58
hepatocyte	RPL38	16.639	0.52189	1.18628e-59	1.69587e-58
hepatocyte	THPO	16.63	6.10345	1.14336e-57	1.5459e-56
hepatocyte	CA2	16.6241	1.79271	2.79665e-59	3.95484e-58
hepatocyte	GLYATL1	16.5576	3.26883	8.71532e-58	1.18551e-56
hepatocyte	CYP7B1	16.5507	3.54891	8.33154e-58	1.13626e-56
hepatocyte	UGT1A6	16.5445	3.73012	1.37866e-57	1.85765e-56
hepatocyte	SLC51A	16.5442	3.85585	1.35265e-57	1.82417e-56
hepatocyte	MGMT	16.4889	0.613897	1.6044e-58	2.23068e-57
hepatocyte	MOGAT2	16.4722	5.97612	1.06993e-56	1.41495e-55
hepatocyte	NUDT9	16.4351	0.689317	2.66502e-58	3.68576e-57
hepatocyte	HPR	16.4256	5.38344	1.70301e-56	2.239e-55
hepatocyte	AIFM1	16.4008	0.897695	4.6033e-58	6.32742e-57
hepatocyte	RPL14	16.3947	0.329907	9.14783e-58	1.24327e-56
hepatocyte	CCDC152	16.3935	2.87351	7.21881e-57	9.59515e-56
hepatocyte	HSD3B7	16.3895	1.13515	5.5957e-58	7.67809e-57
hepatocyte	RPL23	16.379	0.545135	6.24711e-58	8.56443e-57
hepatocyte	IL22RA1	16.3777	1.69207	1.27888e-57	1.72764e-56
hepatocyte	HABP2	16.3535	0.966853	9.19231e-58	1.24823e-56
hepatocyte	RPL36	16.344	0.444552	1.12704e-57	1.52514e-56
hepatocyte	FAM8A1	16.335	1.00961	1.3353e-57	1.80231e-56
hepatocyte	SCARB1	16.302	1.43424	3.35231e-57	4.49387e-56
hepatocyte	CHN2	16.2663	1.57386	6.53613e-57	8.70247e-56
hepatocyte	TMEM205	16.2428	0.729766	5.82427e-57	7.76125e-56
hepatocyte	RPS5	16.2225	0.325811	9.05587e-57	1.20166e-55
hepatocyte	SSUH2	16.1981	2.72843	6.06012e-56	7.86215e-55
hepatocyte	BAMBI	16.1936	0.859547	1.04906e-56	1.38853e-55
hepatocyte	PYGL	16.1712	1.40988	1.85616e-56	2.4383e-55
hepatocyte	SLC25A1	16.1689	0.955604	1.68619e-56	2.21874e-55
hepatocyte	DMGDH	16.1643	6.00744	7.54445e-55	9.58212e-54
hepatocyte	SLC17A9	16.1502	1.74445	3.69096e-56	4.80835e-55
hepatocyte	ECM2	16.108	3.6488	6.25193e-55	7.95337e-54
hepatocyte	GFRA1	16.1069	5.09931	1.40453e-54	1.77242e-53
hepatocyte	MSRB1	16.0755	0.896136	6.04991e-56	7.85539e-55
hepatocyte	ABCA5	16.0641	1.52545	1.24024e-55	1.59848e-54
hepatocyte	RPS27	16.0311	0.43922	1.17104e-55	1.51053e-54
hepatocyte	TCEA3	15.9718	1.49078	3.95942e-55	5.06155e-54
hepatocyte	RPS6	15.9659	0.280492	6.15836e-55	7.84068e-54
hepatocyte	ELOVL2	15.9341	4.94117	1.27354e-53	1.58546e-52
hepatocyte	NRBP2	15.9071	1.33548	1.05017e-54	1.32951e-53
hepatocyte	AKAP7	15.7517	2.6022	3.6553e-53	4.49011e-52
hepatocyte	RPL28	15.7464	0.445649	9.12231e-54	1.13746e-52
hepatocyte	CYP4A22	15.7401	5.4334	2.53961e-52	3.05277e-51
hepatocyte	SELENBP1	15.738	1.07697	8.80303e-54	1.09853e-52
hepatocyte	FAHD1	15.7202	0.741888	1.14003e-53	1.42038e-52
hepatocyte	CYP2J2	15.7024	1.73147	2.84001e-53	3.50782e-52
hepatocyte	SEC14L4	15.7001	4.77189	3.71812e-52	4.44561e-51
hepatocyte	CEP57	15.6814	0.765784	2.01669e-53	2.49876e-52
hepatocyte	MPV17L	15.6811	2.84132	1.35409e-52	1.63899e-51
hepatocyte	FOXA1	15.6681	1.33894	2.83982e-53	3.50782e-52
hepatocyte	PDZK1IP1	15.6582	1.14418	2.85323e-53	3.52137e-52
hepatocyte	RPL36A	15.6575	0.782078	2.87083e-53	3.54032e-52
hepatocyte	RPS24	15.6452	0.380684	3.59039e-53	4.41382e-52
hepatocyte	SHMT2	15.6355	0.835665	3.92803e-53	4.81759e-52
hepatocyte	MPC2	15.5898	0.562918	1.00381e-52	1.22065e-51
hepatocyte	NINJ2	15.5669	2.73801	5.11752e-52	6.10489e-51
hepatocyte	CISD1	15.5618	0.700807	1.14819e-52	1.39407e-51
hepatocyte	NADK2	15.5591	1.13163	1.47751e-52	1.78563e-51
hepatocyte	AKR7A3	15.5233	1.23008	2.04131e-52	2.46132e-51
hepatocyte	FLRT3	15.5106	1.16281	3.08034e-52	3.68866e-51
hepatocyte	LINC00665	15.4846	1.33791	4.85915e-52	5.80107e-51
hepatocyte	DDC	15.4409	1.97978	1.18678e-51	1.40615e-50
hepatocyte	ADI1	15.41	0.569218	1.28042e-51	1.51481e-50
hepatocyte	RXRA	15.3513	0.997148	2.50155e-51	2.93298e-50
hepatocyte	IGFBP4	15.3504	0.880307	2.42124e-51	2.84305e-50
hepatocyte	FKBP5	15.3482	1.06547	3.30812e-51	3.86423e-50
hepatocyte	BHMT	15.339	6.02611	7.84161e-50	8.90814e-49
hepatocyte	CIDEB	15.3366	0.960098	2.95442e-51	3.45621e-50
hepatocyte	NPC1L1	15.3307	1.32587	3.8411e-51	4.47682e-50
hepatocyte	RPL13A	15.3281	0.372352	3.81252e-51	4.44681e-50
hepatocyte	F13B	15.3044	5.55281	1.13259e-49	1.28016e-48
hepatocyte	PIEZO2	15.2843	1.6399	1.00078e-50	1.15697e-49
hepatocyte	HSPE1	15.2609	0.533984	8.75534e-51	1.01517e-49
hepatocyte	GPT	15.248	2.4669	4.76465e-50	5.44417e-49
hepatocyte	CNTLN	15.2141	2.08247	4.62059e-50	5.28341e-49
hepatocyte	NR1H3	15.192	1.58022	3.32715e-50	3.81833e-49
hepatocyte	KCNT2	15.1916	3.85764	2.1844e-49	2.46015e-48
hepatocyte	TNFAIP8L1	15.155	1.69294	7.56666e-50	8.60824e-49
hepatocyte	RDH12	15.1387	1.73073	1.00523e-49	1.13865e-48
hepatocyte	NDRG2	15.1362	1.03779	5.24054e-50	5.98359e-49
hepatocyte	SNAP25	15.1325	1.30986	6.83426e-50	7.78066e-49
hepatocyte	IYD	15.1117	1.32953	8.90717e-50	1.0104e-48
hepatocyte	UNC5CL	15.0982	1.56935	1.40973e-49	1.59112e-48
hepatocyte	UGT1A9	15.0476	4.63906	2.26668e-48	2.49208e-47
hepatocyte	FAM20A	15.0471	5.11744	3.28798e-48	3.59982e-47
hepatocyte	MRPL23	15.0372	1.27022	3.00204e-49	3.37134e-48
hepatocyte	RPL29	15.0348	0.345931	3.1803e-49	3.56643e-48
hepatocyte	PPP1R3C	15.034	1.65609	3.36142e-49	3.76417e-48
hepatocyte	NAV2	15.008	2.28689	7.90251e-49	8.78671e-48
hepatocyte	TMEM256	14.9893	0.925673	4.25044e-49	4.75293e-48
hepatocyte	MTHFS	14.9813	0.905309	4.5653e-49	5.09413e-48
hepatocyte	CENPV	14.9286	0.963132	9.5595e-49	1.06066e-47
hepatocyte	AKR1C1	14.914	0.866311	1.26148e-48	1.3967e-47
hepatocyte	S100A14	14.8955	0.933651	1.8181e-48	2.00592e-47
hepatocyte	PHKA2	14.8941	1.38753	2.03217e-48	2.23738e-47
hepatocyte	BAAT	14.892	0.736602	2.43431e-48	2.67451e-47
hepatocyte	GPX4	14.8414	0.465596	3.97937e-48	4.35072e-47
hepatocyte	SCRN2	14.8392	1.16963	3.98915e-48	4.35838e-47
hepatocyte	LINC00862	14.8312	2.30407	1.0336e-47	1.12069e-46
hepatocyte	ACY3	14.8237	1.31939	5.2155e-48	5.69033e-47
hepatocyte	SAA2	14.8087	2.95681	4.86404e-47	5.1915e-46
hepatocyte	ACADVL	14.8015	0.525512	6.27333e-48	6.82078e-47
hepatocyte	NEAT1	14.7907	0.864707	8.65373e-48	9.40241e-47
hepatocyte	SLC17A3	14.7868	5.61365	1.19219e-46	1.25962e-45
hepatocyte	HMGCS1	14.7716	0.987461	9.44005e-48	1.02497e-46
hepatocyte	FGFR4	14.7482	1.01903	1.19915e-47	1.29662e-46
hepatocyte	RPL10A	14.7482	0.28276	1.9735e-47	2.12658e-46
hepatocyte	STRADB	14.7195	1.33194	2.28093e-47	2.45282e-46
hepatocyte	SLC43A3	14.7112	1.95434	4.17353e-47	4.46057e-46
hepatocyte	ABCB11	14.711	3.03469	1.43916e-46	1.51749e-45
hepatocyte	RPS10	14.6942	0.463166	2.60732e-47	2.79997e-46
hepatocyte	TRAM1	14.6868	0.483813	2.77972e-47	2.98308e-46
hepatocyte	CPN2	14.6704	6.0485	5.89625e-46	6.11863e-45
hepatocyte	PPP1R3B	14.6678	1.40198	5.71222e-47	6.08851e-46
hepatocyte	GSTK1	14.6117	0.518737	1.1045e-46	1.16775e-45
hepatocyte	SLC16A2	14.574	1.58213	2.14834e-46	2.25619e-45
hepatocyte	INHBC	14.5736	5.53065	1.73316e-45	1.77277e-44
hepatocyte	SOX5	14.5448	2.12009	4.61684e-46	4.81322e-45
hepatocyte	AKR1C3	14.4242	0.711896	2.89912e-45	2.95383e-44
hepatocyte	PLIN2	14.4175	0.87091	1.10837e-45	1.13889e-44
hepatocyte	TRIM55	14.4066	4.03828	7.08938e-45	7.12157e-44
hepatocyte	ACOX1	14.382	0.756387	1.79025e-45	1.82997e-44
hepatocyte	GCKR	14.3677	2.57094	7.48099e-45	7.51015e-44
hepatocyte	AFMID	14.3432	1.14991	3.58685e-45	3.64273e-44
hepatocyte	QDPR	14.3397	0.745353	3.17222e-45	3.22789e-44
hepatocyte	STOM	14.3236	0.795896	3.964e-45	4.0102e-44
hepatocyte	NEDD4	14.3048	1.3277	6.2158e-45	6.25602e-44
hepatocyte	WWTR1	14.2961	0.731108	6.29845e-45	6.33514e-44
hepatocyte	NINJ1	14.2725	0.671833	8.6336e-45	8.63965e-44
hepatocyte	MT-ND4L	14.2675	1.22647	9.04743e-45	9.048e-44
hepatocyte	PGRMC1	14.2538	0.545966	1.08594e-44	1.08463e-43
hepatocyte	RNF130	14.2236	0.806256	1.51877e-44	1.51117e-43
hepatocyte	FAU	14.1853	0.37529	2.55248e-44	2.53169e-43
hepatocyte	YPEL2	14.1805	1.23697	3.47635e-44	3.43719e-43
hepatocyte	PC	14.1528	1.87073	7.32109e-44	7.17988e-43
hepatocyte	AMN	14.1215	1.04243	6.0189e-44	5.92871e-43
hepatocyte	TRIP6	14.0978	0.80812	8.16434e-44	7.9919e-43
hepatocyte	RPS28	14.0969	0.419697	8.26389e-44	8.08431e-43
hepatocyte	DUSP23	14.0623	0.687316	1.31274e-43	1.27706e-42
hepatocyte	SLC28A1	14.052	4.25294	1.15192e-42	1.09221e-41
hepatocyte	KRT18	14.0174	0.78597	5.55054e-43	5.31411e-42
hepatocyte	RDH16	14.0039	4.09312	1.96969e-42	1.85193e-41
hepatocyte	DHCR24	13.9813	0.709752	4.03356e-43	3.87592e-42
hepatocyte	IL32	13.9603	0.705378	1.50516e-42	1.42369e-41
hepatocyte	LDHD	13.9412	2.40275	1.5831e-42	1.49561e-41
hepatocyte	SMOC1	13.9127	1.35468	1.08244e-42	1.02757e-41
hepatocyte	DNAJC1	13.9104	0.499266	1.0054e-42	9.5559e-42
hepatocyte	SNAP25-AS1	13.8828	2.92298	4.89913e-42	4.54907e-41
hepatocyte	GSR	13.8669	0.736124	1.75774e-42	1.65762e-41
hepatocyte	ABCG5	13.8593	3.4607	7.77794e-42	7.1671e-41
hepatocyte	L3MBTL4	13.8478	2.2452	4.668e-42	4.34473e-41
hepatocyte	ACADSB	13.8209	1.37405	4.30254e-42	4.00694e-41
hepatocyte	SLCO2B1	13.8106	1.41931	4.13601e-42	3.85414e-41
hepatocyte	RPL10	13.804	0.27545	4.68453e-42	4.35753e-41
hepatocyte	CEBPG	13.7868	0.778532	4.95348e-42	4.59682e-41
hepatocyte	PCK2	13.7587	1.19566	8.04411e-42	7.40369e-41
hepatocyte	CPQ	13.7457	0.908415	8.48891e-42	7.80851e-41
hepatocyte	AQP11	13.7267	1.24933	1.16205e-41	1.06579e-40
hepatocyte	ZFP36	13.6875	0.741967	1.80792e-41	1.65141e-40
hepatocyte	PMPCA	13.6021	0.775274	5.53327e-41	5.02214e-40
hepatocyte	MIA2	13.5985	0.605452	5.91346e-41	5.36102e-40
hepatocyte	TMX4	13.5677	0.836669	9.14769e-41	8.23607e-40
hepatocyte	SLCO4C1	13.5559	5.08122	6.86714e-40	6.00388e-39
hepatocyte	SLC22A9	13.546	4.94362	8.11502e-40	7.0752e-39
hepatocyte	ZNF429	13.5233	2.30507	2.97236e-40	2.63388e-39
hepatocyte	RPS15	13.5204	0.378735	1.56408e-40	1.39939e-39
hepatocyte	MAF	13.5199	1.55781	2.07508e-40	1.84921e-39
hepatocyte	WDR72	13.5061	2.52768	4.28547e-40	3.77617e-39
hepatocyte	PSME1	13.4912	0.529146	2.72522e-40	2.42172e-39
hepatocyte	ORMDL3	13.4739	1.03424	3.00143e-40	2.65815e-39
hepatocyte	GSDMD	13.4725	0.885023	2.90058e-40	2.57464e-39
hepatocyte	TRABD2B	13.4418	2.00061	6.88336e-40	6.01471e-39
hepatocyte	ABCC6	13.437	1.695	6.45494e-40	5.65608e-39
hepatocyte	EPHX1	13.4267	0.69981	5.19401e-40	4.56648e-39
hepatocyte	SLC25A18	13.4243	5.24477	3.56298e-39	3.06058e-38
hepatocyte	FOSB	13.4104	1.16035	6.83525e-40	5.97932e-39
hepatocyte	LIMCH1	13.3987	0.951684	7.47492e-40	6.52436e-39
hepatocyte	AGXT	13.3881	4.92912	5.50536e-39	4.70848e-38
hepatocyte	TXN	13.363	0.373009	1.32445e-39	1.15027e-38
hepatocyte	KCND3	13.3516	4.37295	6.84605e-39	5.84556e-38
hepatocyte	RPL35	13.343	0.434648	1.5107e-39	1.30986e-38
hepatocyte	LINC00987	13.3353	3.448	6.82085e-39	5.82721e-38
hepatocyte	SMPDL3A	13.3332	0.94317	1.72808e-39	1.49668e-38
hepatocyte	RPS21	13.3306	0.419182	1.80063e-39	1.55866e-38
hepatocyte	PRDX3	13.2871	0.463879	3.47669e-39	2.98809e-38
hepatocyte	SLC16A9	13.2269	7.21756	4.65255e-38	3.8819e-37
hepatocyte	MT-ND5	13.2188	0.563006	7.36748e-39	6.28396e-38
hepatocyte	NUDT7	13.2056	1.26312	9.86759e-39	8.38905e-38
hepatocyte	HYI	13.2009	0.797167	9.08641e-39	7.7333e-38
hepatocyte	ACBD4	13.189	1.63157	1.44989e-38	1.22866e-37
hepatocyte	HACD3	13.1646	0.503871	1.4754e-38	1.2496e-37
hepatocyte	RPS11	13.1612	0.380168	1.51849e-38	1.2854e-37
hepatocyte	THRB	13.1583	1.78979	2.1519e-38	1.81279e-37
hepatocyte	EMP2	13.1549	1.04805	1.63932e-38	1.38544e-37
hepatocyte	COX7C	13.1504	0.483019	1.79859e-38	1.5176e-37
hepatocyte	NSA2	13.1405	0.400514	2.10596e-38	1.77504e-37
hepatocyte	RPL18A	13.1384	0.326947	2.16237e-38	1.82063e-37
hepatocyte	IL15RA	13.1234	1.487	3.1345e-38	2.63207e-37
hepatocyte	MT2A	13.1181	1.25829	2.73963e-38	2.30296e-37
hepatocyte	NR5A2	13.092	1.8017	6.21123e-38	5.16321e-37
hepatocyte	UBE2L6	13.0862	1.00347	3.84522e-38	3.21512e-37
hepatocyte	PRRG4	13.0846	0.976972	4.03893e-38	3.3753e-37
hepatocyte	POLR2F	13.0518	0.56944	5.8765e-38	4.89273e-37
hepatocyte	KCNJ16	13.0461	1.5218	7.99556e-38	6.62893e-37
hepatocyte	RPS20	13.028	0.445655	7.93284e-38	6.58041e-37
hepatocyte	XPNPEP2	13.0272	3.90539	3.60902e-37	2.93485e-36
hepatocyte	MASP1	13.0232	2.26923	1.66497e-37	1.37099e-36
hepatocyte	SERPINA11	13.0154	5.10583	5.05581e-37	4.09443e-36
hepatocyte	GCHFR	13.0039	0.840846	1.0729e-37	8.88109e-37
hepatocyte	ATP1B1	12.9945	0.74535	1.82263e-37	1.49845e-36
hepatocyte	TM6SF2	12.9829	2.35158	2.8564e-37	2.32885e-36
hepatocyte	KANK1	12.9755	1.00813	1.60631e-37	1.32477e-36
hepatocyte	MT-ND3	12.9598	0.603101	1.84076e-37	1.51256e-36
hepatocyte	WWP1	12.9443	0.638582	2.24351e-37	1.83582e-36
hepatocyte	SULT1C2	12.9436	1.95518	3.96871e-37	3.22235e-36
hepatocyte	LTBP3	12.9402	0.825814	2.45801e-37	2.00925e-36
hepatocyte	MMP3	12.935	3.63247	1.09141e-36	8.76646e-36
hepatocyte	NOL3	12.9251	0.715219	2.83632e-37	2.31368e-36
hepatocyte	GRTP1	12.905	1.02496	3.66631e-37	2.9799e-36
hepatocyte	SOX6	12.8876	1.3024	5.30759e-37	4.29611e-36
hepatocyte	RPL21	12.8561	0.331493	6.65518e-37	5.37858e-36
hepatocyte	SCP2	12.8325	0.408772	1.12013e-36	8.99254e-36
hepatocyte	WEE1	12.8218	1.03865	1.09025e-36	8.7616e-36
hepatocyte	GLYAT	12.8175	4.96723	4.8807e-36	3.81685e-35
hepatocyte	PARP14	12.7973	0.764366	1.36742e-36	1.09164e-35
hepatocyte	ADGRG6	12.7833	1.19263	1.80984e-36	1.43972e-35
hepatocyte	DCDC2	12.7818	0.685603	2.11418e-36	1.67757e-35
hepatocyte	DGAT2	12.7688	1.79953	2.73064e-36	2.15909e-35
hepatocyte	RPS19	12.7677	0.328323	1.97293e-36	1.56707e-35
hepatocyte	CES3	12.7618	3.60179	7.30473e-36	5.68705e-35
hepatocyte	IL6R	12.7575	1.42087	2.57031e-36	2.03437e-35
hepatocyte	RAP1GAP	12.7557	1.2559	2.78161e-36	2.19828e-35
hepatocyte	CROT	12.7379	0.796681	2.84633e-36	2.2483e-35
hepatocyte	KLHL4	12.7271	0.997086	3.31934e-36	2.61666e-35
hepatocyte	SLC46A1	12.6981	2.46096	9.09576e-36	7.05697e-35
hepatocyte	ECI2	12.695	0.526245	4.94554e-36	3.86564e-35
hepatocyte	CPN1	12.6777	5.85037	2.79231e-35	2.14104e-34
hepatocyte	PROZ	12.6761	7.17694	3.03801e-35	2.32717e-34
hepatocyte	SLC7A9	12.6734	3.37915	1.55174e-35	1.19741e-34
hepatocyte	ISOC1	12.6581	0.946847	7.63451e-36	5.93498e-35
hepatocyte	CYP4F12	12.6431	1.26859	9.82509e-36	7.60779e-35
hepatocyte	COA3	12.5939	0.492885	1.74329e-35	1.34391e-34
hepatocyte	RTN4RL2	12.5643	3.71845	8.00016e-35	6.072e-34
hepatocyte	UQCRQ	12.5584	0.472546	2.47627e-35	1.90057e-34
hepatocyte	CNKSR3	12.5534	1.30464	3.19346e-35	2.44505e-34
hepatocyte	CDH6	12.5319	0.879016	3.47921e-35	2.65865e-34
hepatocyte	RPS25	12.5158	0.404129	4.13874e-35	3.15802e-34
hepatocyte	MT-ND2	12.481	0.493086	6.26072e-35	4.7633e-34
hepatocyte	SCTR	12.4579	1.5899	1.20409e-34	9.06879e-34
hepatocyte	ADH1B	12.437	3.54667	3.92465e-34	2.91124e-33
hepatocyte	ALDH5A1	12.4306	1.1389	1.23668e-34	9.30976e-34
hepatocyte	ASL	12.4276	0.641147	1.19686e-34	9.02295e-34
hepatocyte	MOCOS	12.4084	1.45442	1.79659e-34	1.34603e-33
hepatocyte	LRIG3	12.3347	1.14815	4.42451e-34	3.27585e-33
hepatocyte	BMP6	12.3039	2.82722	1.12387e-33	8.23556e-33
hepatocyte	HOGA1	12.297	3.04386	1.24017e-33	9.07089e-33
hepatocyte	HEBP1	12.2796	0.566978	6.84736e-34	5.04828e-33
hepatocyte	CYP4F11	12.2723	1.33579	8.22256e-34	6.04514e-33
hepatocyte	CLGN	12.2529	3.22603	1.91321e-33	1.39288e-32
hepatocyte	RPL37A	12.2314	0.37363	1.2097e-33	8.85216e-33
hepatocyte	CPS1	12.2231	2.75552	3.50793e-33	2.5351e-32
hepatocyte	VPS13A	12.2164	0.685785	1.44371e-33	1.05254e-32
hepatocyte	CYP3A4	12.215	2.72962	3.35779e-33	2.42995e-32
hepatocyte	SAMD11	12.2022	2.97085	4.13373e-33	2.97913e-32
hepatocyte	LGALS4	12.2009	0.892745	2.23197e-33	1.6227e-32
hepatocyte	IRS2	12.1296	1.24813	4.385e-33	3.15732e-32
hepatocyte	ICAM1	12.1085	2.09381	6.4244e-33	4.60464e-32
hepatocyte	SLC35D1	12.1065	1.03961	5.56628e-33	3.99506e-32
hepatocyte	PCK1	12.1058	3.60789	1.67468e-32	1.18039e-31
hepatocyte	SLC22A25	12.0922	5.76359	2.21874e-32	1.56022e-31
hepatocyte	RPL31	12.0834	0.54841	6.81761e-33	4.87757e-32
hepatocyte	HDAC6	12.0801	1.0144	7.58285e-33	5.41273e-32
hepatocyte	MME	12.0761	1.60691	8.43115e-33	6.01006e-32
hepatocyte	HIBCH	12.0586	0.657055	9.09842e-33	6.47397e-32
hepatocyte	RPS9	12.0519	0.195853	1.09766e-32	7.79982e-32
hepatocyte	RORA	12.0437	1.18756	1.1591e-32	8.22892e-32
hepatocyte	SLC40A1	12.0431	0.648461	1.46417e-32	1.03387e-31
hepatocyte	SCCPDH	12.0217	0.603243	1.39468e-32	9.86573e-32
hepatocyte	FDX1	12.0197	0.522625	1.4277e-32	1.00948e-31
hepatocyte	CAMK2N1	12.0156	0.415406	1.69605e-32	1.19492e-31
hepatocyte	LSR	12.0059	0.544518	2.17982e-32	1.53368e-31
hepatocyte	CIDEC	11.9775	2.25302	3.94008e-32	2.74148e-31
hepatocyte	LBR	11.9688	0.866821	2.61862e-32	1.83748e-31
hepatocyte	HRG	11.9485	6.20642	1.18e-31	8.1027e-31
hepatocyte	SDC4	11.9353	0.73239	3.78264e-32	2.6366e-31
hepatocyte	PDK4	11.925	2.27642	7.39202e-32	5.10264e-31
hepatocyte	DHRS7	11.9035	0.44187	5.80608e-32	4.01847e-31
hepatocyte	RPL9	11.8994	0.211734	5.7843e-32	4.00516e-31
hepatocyte	SLPI	11.8922	0.935203	6.23562e-32	4.31386e-31
hepatocyte	RPL35A	11.8536	0.335751	9.64292e-32	6.63309e-31
hepatocyte	ANXA2R	11.8452	2.68503	2.0668e-31	1.41058e-30
hepatocyte	LAMA5-AS1	11.8431	3.84939	2.89524e-31	1.96319e-30
hepatocyte	MSRA	11.8325	0.737598	1.22963e-31	8.43244e-31
hepatocyte	FAM13C	11.8288	2.14164	1.8649e-31	1.27444e-30
hepatocyte	ALDOC	11.7936	2.55201	3.50775e-31	2.3734e-30
hepatocyte	TRAPPC6A	11.7647	0.683802	2.65327e-31	1.80535e-30
hepatocyte	NQO2	11.764	0.594932	2.67963e-31	1.82171e-30
hepatocyte	C12orf57	11.7555	0.517512	2.94497e-31	1.99605e-30
hepatocyte	C2CD4A	11.7402	1.91009	5.55498e-31	3.73446e-30
hepatocyte	GBP2	11.7369	0.705567	3.63476e-31	2.45827e-30
hepatocyte	HDHD3	11.7313	0.712508	3.96486e-31	2.67807e-30
hepatocyte	SETBP1	11.7073	1.36512	5.65965e-31	3.8032e-30
hepatocyte	CLDN14	11.6959	1.84896	7.8901e-31	5.27495e-30
hepatocyte	TLE1	11.6808	0.538405	6.87127e-31	4.60164e-30
hepatocyte	NFKBIZ	11.6749	0.836239	7.45379e-31	4.9875e-30
hepatocyte	KRT222	11.662	2.16809	1.35301e-30	8.99201e-30
hepatocyte	ATF7IP2	11.65	1.51677	1.13586e-30	7.55527e-30
hepatocyte	SEMA6A	11.6323	1.45003	1.3769e-30	9.14305e-30
hepatocyte	SLC39A14	11.626	0.63474	1.2713e-30	8.45258e-30
hepatocyte	GPT2	11.6224	0.99918	1.36169e-30	9.04587e-30
hepatocyte	NOVA1	11.5917	2.59553	2.86564e-30	1.88614e-29
hepatocyte	SUCLG1	11.5763	0.461565	2.22198e-30	1.46864e-29
hepatocyte	NDUFC1	11.5257	0.536514	3.91383e-30	2.56423e-29
hepatocyte	LINC01320	11.4966	3.72907	1.36555e-29	8.81434e-29
hepatocyte	TTC39C	11.4909	0.818004	5.82424e-30	3.79845e-29
hepatocyte	DMD	11.4719	2.13323	1.00394e-29	6.50426e-29
hepatocyte	TOX3	11.464	0.666051	8.04243e-30	5.22558e-29
hepatocyte	LPCAT3	11.439	0.880385	1.03692e-29	6.7152e-29
hepatocyte	GCH1	11.4324	1.59385	1.35712e-29	8.76353e-29
hepatocyte	ACADM	11.4205	0.65156	1.25327e-29	8.1063e-29
hepatocyte	HMGCL	11.4153	0.605587	1.32759e-29	8.58344e-29
hepatocyte	CDHR2	11.4114	0.876721	1.44888e-29	9.34458e-29
hepatocyte	HRCT1	11.4109	1.78562	1.79583e-29	1.15443e-28
hepatocyte	PAQR9-AS1	11.4042	4.60333	3.97935e-29	2.53526e-28
hepatocyte	SLC27A5	11.4003	1.08317	1.6713e-29	1.07614e-28
hepatocyte	DPM3	11.3985	0.857743	1.65773e-29	1.06784e-28
hepatocyte	HIBADH	11.368	0.722024	2.2516e-29	1.44564e-28
hepatocyte	SAT2	11.3505	0.419555	2.73984e-29	1.75482e-28
hepatocyte	S100A9	11.3504	4.16651	7.08691e-29	4.48154e-28
hepatocyte	AGFG2	11.3497	1.21965	3.06107e-29	1.95896e-28
hepatocyte	TNFSF14	11.345	4.84439	7.6735e-29	4.84559e-28
hepatocyte	SERPINA3	11.3311	3.27469	6.97892e-29	4.41586e-28
hepatocyte	FBXO17	11.3247	1.04142	3.62906e-29	2.31773e-28
hepatocyte	LPA	11.3214	5.63476	1.00842e-28	6.35508e-28
hepatocyte	ADAMTSL3	11.3017	4.5972	1.13046e-28	7.1128e-28
hepatocyte	MT-ND4	11.2988	0.393193	4.77497e-29	3.03846e-28
hepatocyte	THNSL2	11.2956	1.81715	6.54753e-29	4.14624e-28
hepatocyte	PLSCR4	11.2938	1.19535	5.33573e-29	3.39254e-28
hepatocyte	INPP5D	11.2864	1.20715	5.90365e-29	3.74908e-28
hepatocyte	C1RL	11.2797	0.927587	6.056e-29	3.84272e-28
hepatocyte	TYMP	11.2644	0.867188	7.08843e-29	4.48154e-28
hepatocyte	EDF1	11.2614	0.272386	7.44337e-29	4.70405e-28
hepatocyte	PCSK5	11.241	0.893356	9.11083e-29	5.7463e-28
hepatocyte	TMEM150A	11.2402	0.83198	9.19733e-29	5.79853e-28
hepatocyte	CGREF1	11.2328	2.67775	1.64155e-28	1.0271e-27
hepatocyte	PLGLB2	11.2295	24.9053	2.94324e-28	1.82844e-27
hepatocyte	RPS17	11.2175	0.555953	1.16044e-28	7.29561e-28
hepatocyte	CMYA5	11.215	2.80928	1.90122e-28	1.18815e-27
hepatocyte	ADH1A	11.202	1.45723	1.64589e-28	1.02941e-27
hepatocyte	ETNPPL	11.1996	24.8222	4.02806e-28	2.48274e-27
hepatocyte	TMEM45B	11.1575	0.784443	2.59561e-28	1.61503e-27
hepatocyte	AIFM2	11.1529	0.739288	2.34227e-28	1.4603e-27
hepatocyte	ALPK2	11.1487	1.67041	2.97136e-28	1.84372e-27
hepatocyte	CLUH	11.1478	0.898762	2.54912e-28	1.58736e-27
hepatocyte	LAP3	11.1477	0.524777	2.48492e-28	1.548e-27
hepatocyte	PAQR9	11.1425	3.29711	4.30561e-28	2.64861e-27
hepatocyte	TMEM177	11.1259	0.754959	3.13061e-28	1.93871e-27
hepatocyte	RPS7	11.1203	0.186711	3.45229e-28	2.13455e-27
hepatocyte	ENO3	11.1184	2.38071	5.33405e-28	3.26973e-27
hepatocyte	CSGALNACT1	11.1147	1.46123	3.88981e-28	2.3994e-27
hepatocyte	IFI35	11.1083	0.907934	3.82037e-28	2.3575e-27
hepatocyte	TMEM45A	11.1016	0.912776	4.07794e-28	2.51151e-27
hepatocyte	WNK3	11.0909	3.34141	8.7497e-28	5.30964e-27
hepatocyte	ETNK2	11.0908	2.09142	6.33814e-28	3.87164e-27
hepatocyte	CYP2D6	11.0905	3.87278	9.18874e-28	5.56746e-27
hepatocyte	COX6A1	11.0646	0.408975	6.05242e-28	3.70142e-27
hepatocyte	BLNK	11.0488	1.47589	8.14536e-28	4.95822e-27
hepatocyte	SPX	11.0229	3.62252	1.73678e-27	1.04358e-26
hepatocyte	PLEKHA4	11.0173	1.33509	1.0973e-27	6.6434e-27
hepatocyte	HAO2	11.002	5.5942	2.94349e-27	1.75437e-26
hepatocyte	RPL13	10.9771	0.175869	1.69788e-27	1.02087e-26
hepatocyte	RPL18	10.9769	0.219547	1.59546e-27	9.60026e-27
hepatocyte	PHYKPL	10.9666	0.890699	1.76354e-27	1.05873e-26
hepatocyte	NUGGC	10.9557	6.29554	4.69523e-27	2.77423e-26
hepatocyte	MVK	10.9523	0.965051	2.03727e-27	1.2212e-26
hepatocyte	VSNL1	10.952	1.10214	2.04364e-27	1.22455e-26
hepatocyte	PHB2	10.9441	0.36593	2.22204e-27	1.3279e-26
hepatocyte	ABCA9	10.9435	3.67733	4.32261e-27	2.55887e-26
hepatocyte	GRHPR	10.9154	0.440162	2.97243e-27	1.77095e-26
hepatocyte	MRPS18B	10.9105	0.499972	3.14178e-27	1.86971e-26
hepatocyte	UQCRB	10.8816	0.345721	4.31494e-27	2.5553e-26
hepatocyte	RPL22L1	10.8801	0.510443	4.4647e-27	2.641e-26
hepatocyte	ALDH1B1	10.852	0.898977	5.87552e-27	3.45991e-26
hepatocyte	SLC17A1	10.8506	5.26796	1.3201e-26	7.68436e-26
hepatocyte	AMDHD1	10.8487	1.94792	7.4934e-27	4.39779e-26
hepatocyte	CHRD	10.8402	4.2417	1.43137e-26	8.32898e-26
hepatocyte	SLC5A9	10.8388	2.71549	1.07008e-26	6.25216e-26
hepatocyte	ZCCHC2	10.8339	0.841866	7.09193e-27	4.16684e-26
hepatocyte	GLOD5	10.8251	2.50519	1.01608e-26	5.94104e-26
hepatocyte	SEPSECS	10.8206	1.02621	8.24136e-27	4.82954e-26
hepatocyte	RGS9	10.817	1.32587	9.29644e-27	5.43971e-26
hepatocyte	SLC7A8	10.8158	1.27874	9.89916e-27	5.79024e-26
hepatocyte	CFAP97	10.8092	0.529931	9.13643e-27	5.34808e-26
hepatocyte	RCL1	10.7971	1.10211	1.10818e-26	6.46995e-26
hepatocyte	GACAT2	10.7554	2.73149	2.61475e-26	1.50643e-25
hepatocyte	AK2	10.7334	0.482196	2.03636e-26	1.181e-25
hepatocyte	KCTD14	10.7298	1.59469	2.36456e-26	1.36579e-25
hepatocyte	MBL2	10.7276	5.33846	4.87103e-26	2.78388e-25
hepatocyte	DANT2	10.7214	1.0956	2.33413e-26	1.34872e-25
hepatocyte	PTPRD	10.7059	2.88707	4.63651e-26	2.65564e-25
hepatocyte	NR0B2	10.6832	1.65922	3.92835e-26	2.25331e-25
hepatocyte	MT-CO2	10.6824	0.380452	3.43429e-26	1.97424e-25
hepatocyte	SNHG8	10.6532	0.457587	4.95891e-26	2.83204e-25
hepatocyte	PROSER2	10.6529	1.2227	5.09328e-26	2.90561e-25
hepatocyte	SHBG	10.6485	3.38706	8.48042e-26	4.80649e-25
hepatocyte	SH3BP5	10.6215	0.978445	6.70726e-26	3.81389e-25
hepatocyte	UBD	10.6154	1.82059	8.25036e-26	4.67778e-25
hepatocyte	SLC12A8	10.5882	1.66308	1.05026e-25	5.93122e-25
hepatocyte	XAF1	10.5874	0.962069	9.25038e-26	5.23345e-25
hepatocyte	PALMD	10.5843	0.69241	9.61817e-26	5.43957e-25
hepatocyte	TENM2	10.5702	5.60261	2.30023e-25	1.28471e-24
hepatocyte	DHTKD1	10.5627	0.945065	1.23747e-25	6.97593e-25
hepatocyte	ZG16B	10.557	0.861297	1.30237e-25	7.33123e-25
hepatocyte	MT1E	10.5541	1.22953	1.47596e-25	8.29951e-25
hepatocyte	HGD	10.5437	0.628091	1.45697e-25	8.19565e-25
hepatocyte	ELMO1	10.5311	3.17364	2.86573e-25	1.59319e-24
hepatocyte	XYLB	10.5255	1.89263	2.17612e-25	1.21669e-24
hepatocyte	ST13	10.5101	0.289421	2.11553e-25	1.18366e-24
hepatocyte	GOLGA8B	10.501	1.07669	2.32301e-25	1.29697e-24
hepatocyte	ABHD6	10.4996	1.32355	2.48814e-25	1.38572e-24
hepatocyte	NHSL1	10.4946	0.847912	2.42062e-25	1.35003e-24
hepatocyte	PHYHIPL	10.4891	1.15068	2.58447e-25	1.43886e-24
hepatocyte	RALGPS2	10.4782	1.04447	2.9134e-25	1.61911e-24
hepatocyte	NLGN4Y	10.4646	4.70438	6.14527e-25	3.38173e-24
hepatocyte	TM7SF2	10.4482	0.660026	3.83332e-25	2.1221e-24
hepatocyte	ENPP1	10.4475	1.13531	3.94688e-25	2.1842e-24
hepatocyte	ACADL	10.4465	2.99679	6.18155e-25	3.39931e-24
hepatocyte	PTGFR	10.442	3.89799	7.63357e-25	4.18315e-24
hepatocyte	PLGLB1	10.4288	3.67399	8.55203e-25	4.6783e-24
hepatocyte	ACACB	10.4117	1.39029	6.13621e-25	3.37793e-24
hepatocyte	RTKN	10.3975	0.646497	6.40605e-25	3.5203e-24
hepatocyte	DUSP1	10.3936	0.566288	6.66634e-25	3.66078e-24
hepatocyte	CFB	10.3897	1.0891	7.13652e-25	3.9135e-24
hepatocyte	RPL27	10.3517	0.324117	1.02037e-24	5.57214e-24
hepatocyte	AGMO	10.3512	0.694152	1.02513e-24	5.59616e-24
hepatocyte	MAN1A1	10.3246	0.653876	1.34705e-24	7.32552e-24
hepatocyte	RPS15A	10.3148	0.304214	1.48307e-24	8.05412e-24
hepatocyte	NOTUM	10.3118	0.823129	1.52339e-24	8.26737e-24
hepatocyte	HPX	10.3057	3.40604	2.6883e-24	1.44743e-23
hepatocyte	VKORC1	10.2932	0.381414	1.89598e-24	1.0254e-23
hepatocyte	SLC22A18AS	10.2862	0.944412	1.9836e-24	1.07242e-23
hepatocyte	RAET1G	10.284	2.39453	2.99946e-24	1.61054e-23
hepatocyte	COL27A1	10.2749	0.867258	2.224e-24	1.20073e-23
hepatocyte	LECT2	10.2747	4.13658	4.23379e-24	2.26403e-23
hepatocyte	GRAMD1C	10.2617	1.7258	2.99493e-24	1.60866e-23
hepatocyte	CCDC50	10.258	0.423232	2.68647e-24	1.44694e-23
hepatocyte	PCDH9	10.2511	0.91436	2.98965e-24	1.60638e-23
hepatocyte	PIK3R1	10.2332	0.533279	3.35573e-24	1.8e-23
hepatocyte	GLYCTK	10.233	0.896509	3.41808e-24	1.83219e-23
hepatocyte	DHRS3	10.2293	0.792635	3.48469e-24	1.86647e-23
hepatocyte	CYP2B6	10.1949	4.87855	9.55458e-24	5.05939e-23
hepatocyte	TGFBR3	10.1883	1.26467	5.6871e-24	3.02779e-23
hepatocyte	NSUN6	10.1875	1.00209	5.49335e-24	2.92662e-23
hepatocyte	MFSD2A	10.1324	1.92947	1.15394e-23	6.1001e-23
hepatocyte	CLYBL	10.1069	1.08159	1.21172e-23	6.40128e-23
hepatocyte	DENND5B	10.0694	1.09749	1.76138e-23	9.27069e-23
hepatocyte	COX5B	10.0685	0.409114	1.71967e-23	9.05423e-23
hepatocyte	TRIM14	10.0596	0.882923	1.88801e-23	9.93387e-23
hepatocyte	ASPDH	10.0429	5.38494	4.034e-23	2.10349e-22
hepatocyte	HMOX1	10.039	1.13856	2.39192e-23	1.25474e-22
hepatocyte	N4BP2L1	10.0272	1.55922	2.86485e-23	1.49882e-22
hepatocyte	TSHZ2	10.0241	0.788195	2.66504e-23	1.39522e-22
hepatocyte	RPL27A	10.0215	0.327615	2.74296e-23	1.43553e-22
hepatocyte	SLC10A1	10.0115	5.41502	5.69871e-23	2.95682e-22
hepatocyte	SLC13A5	10.0063	2.02891	3.98686e-23	2.0796e-22
hepatocyte	CD14	9.99264	2.40766	4.74377e-23	2.46868e-22
hepatocyte	TAT	9.97206	4.07466	8.00995e-23	4.12604e-22
hepatocyte	TMEM192	9.97019	0.715905	4.51614e-23	2.35334e-22
hepatocyte	MIR193BHG	9.96753	1.18301	4.93454e-23	2.56541e-22
hepatocyte	BORCS7	9.96684	0.412479	4.71959e-23	2.45763e-22
hepatocyte	KLC4	9.96333	0.717632	4.82146e-23	2.50828e-22
hepatocyte	FAM20C	9.95432	1.08888	5.44766e-23	2.82936e-22
hepatocyte	IMMP2L	9.9516	0.860463	5.46934e-23	2.83968e-22
hepatocyte	CLDN10	9.94218	0.710162	6.12637e-23	3.17452e-22
hepatocyte	FRRS1	9.93125	0.773412	6.61086e-23	3.41993e-22
hepatocyte	ANGPT1	9.91531	2.55845	1.03876e-22	5.32463e-22
hepatocyte	LINC00574	9.91263	2.69712	1.10717e-22	5.66791e-22
hepatocyte	SPR	9.90942	0.607703	8.13659e-23	4.18716e-22
hepatocyte	RPLP2	9.90805	0.322255	8.24787e-23	4.24303e-22
hepatocyte	LRRC61	9.88432	0.85289	1.05169e-22	5.38912e-22
hepatocyte	ZNF43	9.86794	1.54627	1.37223e-22	7.00653e-22
hepatocyte	ZXDB	9.84738	1.24525	1.57398e-22	8.01582e-22
hepatocyte	SLC3A1	9.81603	1.07269	2.09569e-22	1.06211e-21
hepatocyte	ACSL1	9.80849	0.720016	2.17694e-22	1.10258e-21
hepatocyte	DNAJC15	9.78924	0.350635	2.61147e-22	1.32053e-21
hepatocyte	RPS12	9.78799	0.258743	2.6791e-22	1.35386e-21
hepatocyte	SIGMAR1	9.78564	0.623223	2.68688e-22	1.35697e-21
hepatocyte	DCXR	9.77494	0.44204	2.97861e-22	1.50134e-21
hepatocyte	PF4V1	9.75295	2.03704	4.71498e-22	2.36366e-21
hepatocyte	SOBP	9.71647	1.48981	5.72342e-22	2.86463e-21
hepatocyte	RHOU	9.71514	0.651978	5.29452e-22	2.6508e-21
hepatocyte	RPS6KA3	9.70514	0.553529	5.79865e-22	2.90136e-21
hepatocyte	BTG1	9.70318	0.374876	5.96538e-22	2.98383e-21
hepatocyte	CECR2	9.70024	4.47666	9.6542e-22	4.78175e-21
hepatocyte	OGG1	9.69753	0.774595	6.27256e-22	3.13448e-21
hepatocyte	RBCK1	9.68879	0.407908	6.77505e-22	3.38021e-21
hepatocyte	TMEM53	9.68873	0.680909	6.79217e-22	3.38768e-21
hepatocyte	CCDC150	9.68485	1.76144	7.78901e-22	3.8738e-21
hepatocyte	ACY1	9.67651	2.16489	9.53751e-22	4.72544e-21
hepatocyte	LINC01558	9.66313	2.21131	1.12486e-21	5.55572e-21
hepatocyte	SPSB1	9.64399	0.79681	1.05001e-21	5.18762e-21
hepatocyte	ZBED3	9.61855	0.998093	1.33854e-21	6.59035e-21
hepatocyte	SLC17A2	9.60938	5.09917	2.43721e-21	1.18916e-20
hepatocyte	GIMAP2	9.60931	3.3149	2.04137e-21	9.9944e-21
hepatocyte	PRDX6	9.60894	0.290918	1.45775e-21	7.17056e-21
hepatocyte	MRPL21	9.60752	0.438774	1.46407e-21	7.19939e-21
hepatocyte	ADORA2A-AS1	9.60748	3.43625	2.02918e-21	9.93779e-21
hepatocyte	KCTD20	9.59733	0.61181	1.6103e-21	7.90854e-21
hepatocyte	GALM	9.59389	0.845282	1.66425e-21	8.16842e-21
hepatocyte	PHYH	9.56629	0.507383	2.16122e-21	1.05778e-20
hepatocyte	PPP1R14D	9.56307	1.61984	2.48254e-21	1.21053e-20
hepatocyte	FMO1	9.54154	4.44047	4.37746e-21	2.11223e-20
hepatocyte	CYP1A2	9.53813	5.29226	4.83957e-21	2.33163e-20
hepatocyte	CEACAM1	9.53808	0.962295	2.84868e-21	1.38691e-20
hepatocyte	CDHR5	9.53141	0.881471	3.02634e-21	1.47113e-20
hepatocyte	ATOH8	9.50177	1.32785	4.18517e-21	2.02318e-20
hepatocyte	KISS1	9.50065	2.99241	5.14931e-21	2.4763e-20
hepatocyte	CLMN	9.48428	0.890348	4.64794e-21	2.24137e-20
hepatocyte	MCHR1	9.48132	5.05535	7.74467e-21	3.70175e-20
hepatocyte	NUPR1	9.46565	1.54238	5.93091e-21	2.84521e-20
hepatocyte	HSD17B13	9.44606	3.51027	1.01888e-20	4.84933e-20
hepatocyte	SYCE1L	9.43149	0.979205	7.87522e-21	3.76186e-20
hepatocyte	RGS12	9.39177	0.832897	1.11258e-20	5.28569e-20
hepatocyte	PDIA5	9.38564	0.731668	1.16409e-20	5.5254e-20
hepatocyte	SHROOM1	9.36791	0.806656	1.37118e-20	6.49067e-20
hepatocyte	NXPH4	9.36675	1.55219	1.53814e-20	7.26571e-20
hepatocyte	TRIM15	9.36285	0.763761	1.43781e-20	6.79993e-20
hepatocyte	BPHL	9.35859	0.539457	1.48864e-20	7.03822e-20
hepatocyte	BAG2	9.35335	0.775212	1.56344e-20	7.38299e-20
hepatocyte	CXXC4	9.34731	1.84403	1.85954e-20	8.74707e-20
hepatocyte	ZNF793	9.34685	1.77743	1.82682e-20	8.60089e-20
hepatocyte	MYO7A	9.33677	2.35191	2.27612e-20	1.06715e-19
hepatocyte	ACAA1	9.3324	0.367821	1.95108e-20	9.1722e-20
hepatocyte	KLF15	9.3285	3.33262	2.68652e-20	1.25582e-19
hepatocyte	EEF1A1	9.32555	0.201126	2.18454e-20	1.02482e-19

## Sheet: S3_Top1000_markers_MSC_Assembl
Supplementary Dataset 3_S3: Top1000 Marker gene list of Portal mesenchyme (MSC) in assembloids related to Fig. 4 and Extended Data Fig. 8
group	names	scores	logfoldchanges	pvals	pvals_adj
mesenchyme	SPARC	213.198	9.94922	0	0
mesenchyme	COL1A2	113.257	10.0359	1.57676e-278	1.14159e-276
mesenchyme	COL3A1	106.659	10.1133	5.9791e-268	4.10208e-266
mesenchyme	LGALS1	104.971	5.49285	0	0
mesenchyme	COL1A1	104.234	6.93758	0	0
mesenchyme	TPM2	100.622	8.55276	1.12582e-261	7.49479e-260
mesenchyme	BGN	97.6473	9.47339	2.96452e-255	1.91669e-253
mesenchyme	COL6A3	95.8588	10.1376	7.38441e-252	4.60383e-250
mesenchyme	SERPINH1	94.5273	5.19529	3.4303e-273	2.39526e-271
mesenchyme	IGFBP7	85.1213	5.8759	0	0
mesenchyme	MYL9	84.1807	7.40239	2.93643e-239	1.63597e-237
mesenchyme	COL6A2	82.4317	9.03743	1.35031e-229	6.93294e-228
mesenchyme	COL5A2	81.5587	8.54769	2.52585e-228	1.28012e-226
mesenchyme	COL6A1	77.265	6.99388	3.29928e-224	1.6148e-222
mesenchyme	DCN	74.3925	9.53063	1.1089e-214	5.04983e-213
mesenchyme	COL5A1	66.4019	6.38387	3.90026e-204	1.66967e-202
mesenchyme	RCN3	66.2264	8.1273	3.10339e-198	1.26972e-196
mesenchyme	VIM	66.1846	3.96237	0	0
mesenchyme	PXDN	62.25	8.46508	1.0046e-189	3.859e-188
mesenchyme	PRRX1	61.9106	10.2255	4.26422e-188	1.62216e-186
mesenchyme	CALU	61.7528	3.18237	8.32239e-218	3.87991e-216
mesenchyme	EVA1B	59.5676	3.53177	7.34139e-207	3.1862e-205
mesenchyme	COL4A1	59.0618	5.72016	6.36083e-199	2.62297e-197
mesenchyme	CALD1	58.6535	3.16354	3.86977e-216	1.78818e-214
mesenchyme	PDGFRB	56.6904	9.07518	2.40599e-176	8.47546e-175
mesenchyme	ADAMTS12	55.1131	10.0801	2.44343e-172	8.23792e-171
mesenchyme	INHBA	55.0712	8.59196	8.29701e-173	2.82152e-171
mesenchyme	CAV1	54.8623	3.56112	1.10898e-192	4.39981e-191
mesenchyme	GNG11	52.6094	7.27518	3.28999e-167	1.05059e-165
mesenchyme	TGFB1I1	50.4878	5.01016	1.27374e-165	3.99435e-164
mesenchyme	BASP1	50.3453	5.6661	8.50385e-167	2.69907e-165
mesenchyme	GLIPR1	49.9297	5.28954	4.74674e-166	1.49451e-164
mesenchyme	HTRA1	49.3699	4.62098	5.81943e-167	1.85079e-165
mesenchyme	COL4A2	49.317	4.68729	4.37959e-169	1.42755e-167
mesenchyme	ADAMTS2	48.3507	9.0131	3.44437e-155	9.83901e-154
mesenchyme	COL18A1	48.2931	3.03979	7.76098e-169	2.51927e-167
mesenchyme	ANXA6	48.1338	4.73605	5.18291e-159	1.53639e-157
mesenchyme	FBN1	47.4391	7.90094	5.32757e-153	1.50813e-151
mesenchyme	TPM4	47.1235	2.10938	2.98545e-191	1.16677e-189
mesenchyme	ITGA5	46.6523	5.12851	1.34555e-153	3.82276e-152
mesenchyme	ITGA1	46.0538	4.27502	3.17535e-154	9.05408e-153
mesenchyme	MMP14	45.9313	4.1542	5.73518e-154	1.63234e-152
mesenchyme	ID3	45.7767	4.55543	4.77424e-158	1.38904e-156
mesenchyme	PTK7	45.1639	5.46747	1.39102e-148	3.78102e-147
mesenchyme	UNC5B	44.9151	6.21586	8.27492e-147	2.21477e-145
mesenchyme	TWIST1	44.6886	10.1882	6.44512e-145	1.69613e-143
mesenchyme	IKBIP	44.5994	3.22995	1.34491e-156	3.86995e-155
mesenchyme	ENG	44.5666	8.59534	9.5014e-145	2.4921e-143
mesenchyme	MSRB3	44.2838	7.91078	4.82117e-144	1.25614e-142
mesenchyme	THBS2	43.8588	7.49257	4.19186e-143	1.0832e-141
mesenchyme	HOXB2	43.7722	10.0717	2.62196e-142	6.68727e-141
mesenchyme	PCOLCE	43.6815	7.29424	1.62905e-142	4.1752e-141
mesenchyme	DKK3	43.4706	5.91322	6.3775e-143	1.6372e-141
mesenchyme	CSPG4	43.3894	9.45064	2.86402e-141	7.25751e-140
mesenchyme	FLNA	43.1285	2.4238	4.09948e-182	1.49436e-180
mesenchyme	LTBP1	42.745	3.789	7.54594e-148	2.03352e-146
mesenchyme	RAB31	42.5113	5.70644	5.40892e-140	1.36185e-138
mesenchyme	MAP1B	42.4306	4.01151	5.0822e-150	1.39836e-148
mesenchyme	LAMP5	41.9011	5.49056	8.00311e-140	2.01179e-138
mesenchyme	SMIM3	41.8089	5.39146	2.98874e-138	7.42976e-137
mesenchyme	MRC2	41.7055	4.37697	8.40954e-142	2.13445e-140
mesenchyme	WNT5A	41.5507	9.28044	8.2532e-136	2.00411e-134
mesenchyme	FKBP10	41.1882	5.87305	7.41e-136	1.80494e-134
mesenchyme	SRPX2	41.0313	3.54198	4.0118e-141	1.01333e-139
mesenchyme	LOXL2	40.9647	7.53538	2.59269e-134	6.19053e-133
mesenchyme	ATP1B3	40.4986	2.23374	1.58193e-149	4.32993e-148
mesenchyme	FAP	40.3038	8.10753	3.43447e-132	8.05358e-131
mesenchyme	SSR3	39.8383	1.50654	5.8378e-151	1.6176e-149
mesenchyme	TMEM204	39.7818	9.41608	1.83816e-130	4.18542e-129
mesenchyme	PLEKHO1	39.5213	4.78584	5.30014e-132	1.2373e-130
mesenchyme	FN1	39.444	2.87262	1.74109e-174	6.03848e-173
mesenchyme	MAP1A	39.3629	8.60763	3.263e-129	7.33405e-128
mesenchyme	GPX8	39.3133	3.76328	1.22437e-135	2.96395e-134
mesenchyme	ACTB	38.8848	1.46211	1.05206e-188	4.02162e-187
mesenchyme	BAALC	38.7199	9.17851	3.63433e-127	8.05345e-126
mesenchyme	EMP1	38.6481	6.95341	2.77936e-127	6.17632e-126
mesenchyme	CD276	38.2041	3.17404	7.71996e-132	1.79686e-130
mesenchyme	TCF4	38.1921	5.64471	1.37965e-126	3.04007e-125
mesenchyme	RAB34	37.66	3.6257	6.32405e-131	1.45259e-129
mesenchyme	PLAT	37.6187	8.60477	1.04695e-123	2.23183e-122
mesenchyme	MYDGF	37.5275	1.5227	1.40487e-137	3.47044e-136
mesenchyme	CTHRC1	37.3289	7.06275	2.3917e-123	5.0916e-122
mesenchyme	AP2M1	37.2231	1.67775	6.57309e-144	1.70694e-142
mesenchyme	FSTL1	37.0658	4.3699	1.5222e-125	3.30779e-124
mesenchyme	CDH13	36.9961	8.94725	1.05548e-121	2.21398e-120
mesenchyme	PDLIM2	36.9443	2.86456	1.03326e-128	2.30919e-127
mesenchyme	TRPV2	36.879	9.43988	2.78171e-121	5.77324e-120
mesenchyme	ACTG1	36.869	1.47297	4.13061e-177	1.46824e-175
mesenchyme	LUM	36.4885	6.36778	3.75981e-121	7.78265e-120
mesenchyme	RCN1	36.471	2.60492	6.1861e-131	1.42298e-129
mesenchyme	FAM171B	36.4563	7.72097	4.39026e-120	9.0164e-119
mesenchyme	TIMP2	36.4435	2.6341	1.83585e-135	4.43739e-134
mesenchyme	LMNA	36.2664	1.7909	1.86292e-133	4.4279e-132
mesenchyme	ARPC2	36.2032	1.39704	3.77679e-141	9.55511e-140
mesenchyme	SPHK1	35.7127	4.57807	2.0408e-119	4.16945e-118
mesenchyme	PPFIBP1	35.6444	2.69338	2.42415e-125	5.23877e-124
mesenchyme	CDH11	34.7982	7.48637	9.36324e-115	1.83424e-113
mesenchyme	ACTR3	34.5069	1.8563	2.14471e-130	4.87633e-129
mesenchyme	P3H1	34.4168	3.24205	1.38996e-117	2.81052e-116
mesenchyme	MYADM	34.3226	3.25344	2.5856e-119	5.27562e-118
mesenchyme	NID1	34.0139	4.10861	6.66834e-114	1.29022e-112
mesenchyme	NOTCH3	33.91	5.03078	1.08402e-112	2.06437e-111
mesenchyme	P4HA2	33.7707	2.26285	3.66654e-123	7.78447e-122
mesenchyme	SNAI2	33.5751	3.79262	9.81951e-114	1.89526e-112
mesenchyme	AP2S1	33.4852	1.33942	1.43261e-122	3.01713e-121
mesenchyme	COL12A1	33.0611	5.64398	2.46897e-109	4.55281e-108
mesenchyme	TMED9	32.9039	1.43427	1.54733e-121	3.23704e-120
mesenchyme	PHLDA1	32.8851	2.18941	3.5856e-121	7.43185e-120
mesenchyme	CTSB	32.8001	2.24877	2.35533e-115	4.62558e-114
mesenchyme	MICAL2	32.7087	3.0213	2.0327e-112	3.85233e-111
mesenchyme	TSPAN5	32.6672	2.8285	4.06658e-116	8.05675e-115
mesenchyme	ZEB1	32.6628	5.47112	5.95132e-108	1.08219e-106
mesenchyme	PELO	32.4202	2.88827	1.53157e-110	2.85777e-109
mesenchyme	ACTN1	32.3659	1.56387	1.21753e-121	2.55049e-120
mesenchyme	CREB3L1	32.2219	5.59254	2.11959e-106	3.80582e-105
mesenchyme	DEGS1	32.0872	2.96024	8.21409e-110	1.52363e-108
mesenchyme	MMP11	31.9894	7.47917	5.19817e-105	9.22807e-104
mesenchyme	COL5A3	31.898	7.85372	1.22466e-104	2.16188e-103
mesenchyme	EHD2	31.8219	4.28242	4.26712e-106	7.65306e-105
mesenchyme	CAP1	31.8109	1.42542	3.37272e-123	7.17033e-122
mesenchyme	CLIC4	31.5443	2.23527	1.69614e-111	3.18757e-110
mesenchyme	OSTC	31.2211	1.29785	3.62088e-113	6.92907e-112
mesenchyme	TBX2	31.0834	9.29357	1.05124e-101	1.80898e-100
mesenchyme	KDELR2	31.0724	1.44117	2.86324e-114	5.57427e-113
mesenchyme	TUBB6	31.0582	3.40198	4.74315e-105	8.42983e-104
mesenchyme	ACTA2	30.8831	4.88012	9.87828e-102	1.70173e-100
mesenchyme	LAMA2	30.7932	7.96667	9.70696e-101	1.65767e-99
mesenchyme	ZNF469	30.7291	6.80333	1.24327e-100	2.11626e-99
mesenchyme	MYH9	30.5067	1.77555	1.0192e-112	1.94328e-111
mesenchyme	LAMB1	30.4652	1.93518	2.73551e-112	5.17803e-111
mesenchyme	EFEMP2	30.3413	6.26541	2.39585e-99	4.00864e-98
mesenchyme	NT5DC2	30.2756	2.50434	1.15528e-106	2.07911e-105
mesenchyme	EDNRA	30.2427	9.36758	1.05455e-98	1.74769e-97
mesenchyme	CLEC11A	30.1688	5.35622	5.79137e-99	9.63859e-98
mesenchyme	SPOCK1	30.1447	4.0169	4.86284e-101	8.3134e-100
mesenchyme	EMP3	29.9599	2.07721	2.75166e-117	5.54247e-116
mesenchyme	TMED3	29.8166	1.4782	8.5785e-111	1.60258e-109
mesenchyme	AEBP1	29.7987	8.24503	3.75694e-97	6.09136e-96
mesenchyme	CPE	29.7494	3.14158	2.83367e-101	4.85494e-100
mesenchyme	CDK2AP1	29.727	1.49648	1.09159e-111	2.05389e-110
mesenchyme	DDR2	29.7228	7.97718	6.57154e-97	1.06329e-95
mesenchyme	ITGA4	29.6512	9.50533	1.41712e-96	2.27886e-95
mesenchyme	MYO1B	29.5395	2.31633	1.38083e-100	2.34531e-99
mesenchyme	MXRA8	29.4084	4.90786	1.11495e-96	1.79662e-95
mesenchyme	FERMT2	29.3634	3.06381	3.94229e-99	6.57509e-98
mesenchyme	NID2	29.3151	8.76073	2.22828e-95	3.53979e-94
mesenchyme	MSN	29.2686	1.9198	5.41555e-106	9.70167e-105
mesenchyme	SRM	29.2133	1.90617	4.84711e-103	8.45205e-102
mesenchyme	RASSF8	28.9414	3.44773	1.73824e-96	2.78384e-95
mesenchyme	EID1	28.8983	1.18945	9.66878e-106	1.72817e-104
mesenchyme	NBL1	28.8784	2.61046	1.91746e-97	3.11533e-96
mesenchyme	GNB4	28.6488	6.41213	3.50943e-93	5.45367e-92
mesenchyme	HOPX	28.5742	9.37366	1.1928e-92	1.83726e-91
mesenchyme	LAMA4	28.527	5.80047	8.48554e-93	1.30959e-91
mesenchyme	SERPINE1	28.1338	3.55626	2.87164e-94	4.50713e-93
mesenchyme	SUGCT	28.1049	5.32464	2.39874e-91	3.63771e-90
mesenchyme	SPRY4	28.0315	3.89666	5.85972e-92	8.93806e-91
mesenchyme	RHOA	27.8988	1.09499	1.33059e-102	2.30993e-101
mesenchyme	OSBPL8	27.7135	1.93417	3.31409e-95	5.24875e-94
mesenchyme	TLN1	27.6425	1.6748	1.25332e-96	2.0175e-95
mesenchyme	ATP2B1	27.5566	2.14776	3.87635e-93	6.01198e-92
mesenchyme	TUBA1B	27.5064	2.13234	1.14061e-95	1.81562e-94
mesenchyme	TAGLN	27.3693	4.96516	6.63663e-90	9.89261e-89
mesenchyme	PTEN	27.3303	1.95997	6.42513e-93	9.94534e-92
mesenchyme	NEXN	27.2935	3.99974	3.47272e-89	5.11819e-88
mesenchyme	DSTN	27.2235	1.01551	1.03747e-98	1.72119e-97
mesenchyme	TSPAN4	27.1798	2.69607	5.37475e-91	8.1117e-90
mesenchyme	CTSK	26.996	6.87034	7.07094e-87	1.00901e-85
mesenchyme	CAPZB	26.9711	1.26438	1.78466e-95	2.83793e-94
mesenchyme	TPBG	26.9209	2.89572	2.45455e-89	3.6278e-88
mesenchyme	SACS	26.7601	3.21926	4.57961e-88	6.63747e-87
mesenchyme	MXRA7	26.6703	2.90028	1.17745e-88	1.72403e-87
mesenchyme	RHOQ	26.6378	2.91186	9.86478e-88	1.42581e-86
mesenchyme	LAMC1	26.6176	2.02088	7.41334e-91	1.11669e-89
mesenchyme	PAPSS2	26.5786	3.37455	4.95803e-87	7.08142e-86
mesenchyme	CRTAP	26.5294	1.96337	6.33974e-90	9.45904e-89
mesenchyme	EMILIN1	26.5276	8.12156	4.5793e-85	6.37248e-84
mesenchyme	SRPX	26.488	6.4193	5.03074e-85	6.99451e-84
mesenchyme	MFAP2	26.4635	5.53967	2.88299e-85	4.02977e-84
mesenchyme	TNFAIP6	26.4231	6.68098	7.39692e-85	1.0239e-83
mesenchyme	CHN1	26.317	5.88766	1.88625e-84	2.59955e-83
mesenchyme	MARVELD1	26.2755	4.88497	9.42949e-85	1.30411e-83
mesenchyme	CD9	26.257	2.44581	5.41064e-89	7.96687e-88
mesenchyme	MMP2	26.1922	4.55274	1.03022e-84	1.42355e-83
mesenchyme	BCAT1	26.1644	5.11598	4.36091e-84	5.97334e-83
mesenchyme	RGS10	26.1429	3.65783	6.84022e-85	9.48514e-84
mesenchyme	TMEM47	26.0066	3.89767	3.10485e-84	4.26774e-83
mesenchyme	GREM1	26.0004	9.29775	4.97391e-83	6.74828e-82
mesenchyme	SPRED1	25.9743	2.5936	7.81466e-86	1.09818e-84
mesenchyme	DSEL	25.9379	2.52675	2.33229e-86	3.29817e-85
mesenchyme	ILK	25.7775	1.98793	2.3319e-86	3.29817e-85
mesenchyme	ARF4	25.7304	1.22174	6.26603e-90	9.35795e-89
mesenchyme	WIPF1	25.6847	3.9334	3.12748e-83	4.25788e-82
mesenchyme	COPS8	25.6711	2.06605	1.39121e-85	1.95154e-84
mesenchyme	SEC24D	25.6367	2.24107	1.42123e-85	1.99187e-84
mesenchyme	P4HB	25.6076	0.916195	7.21578e-90	1.07457e-88
mesenchyme	WIPI1	25.5927	3.08088	1.464e-83	2.00007e-82
mesenchyme	GNAS	25.5476	0.869128	1.3996e-97	2.27867e-96
mesenchyme	KDELR3	25.4492	2.25465	6.76168e-85	9.38451e-84
mesenchyme	PPP1R18	25.4227	2.71273	1.51912e-83	2.07357e-82
mesenchyme	PAG1	25.3835	4.67477	3.68306e-81	4.93304e-80
mesenchyme	RGS4	25.3583	6.42733	9.63009e-81	1.28328e-79
mesenchyme	FAM114A1	25.3565	1.51312	1.68449e-87	2.41911e-86
mesenchyme	INAFM1	25.3399	4.17967	2.70346e-81	3.62716e-80
mesenchyme	LTBP2	25.3377	5.37688	8.42741e-81	1.12588e-79
mesenchyme	VEGFB	25.1599	2.05013	1.19069e-84	1.64241e-83
mesenchyme	SSH1	25.1512	3.19018	2.25216e-81	3.02425e-80
mesenchyme	NTM	25.1437	10.8892	9.55983e-80	1.26214e-78
mesenchyme	HDLBP	25.1021	1.16429	7.53162e-87	1.07377e-85
mesenchyme	UCHL1	25.0625	5.25073	4.82193e-80	6.38763e-79
mesenchyme	COX7A1	24.9693	7.5065	3.81319e-79	4.98826e-78
mesenchyme	QKI	24.9153	2.00523	3.50039e-83	4.76143e-82
mesenchyme	ANTXR1	24.8059	6.36504	1.30675e-78	1.69532e-77
mesenchyme	ALDH1L2	24.7077	7.23691	3.80083e-78	4.9027e-77
mesenchyme	AHNAK	24.704	1.5973	9.79766e-84	1.3397e-82
mesenchyme	ARMC9	24.6113	2.95295	1.48539e-79	1.95615e-78
mesenchyme	ARHGEF17	24.428	5.05393	2.30562e-77	2.95944e-76
mesenchyme	P4HA1	24.4248	2.39959	6.9151e-80	9.13735e-79
mesenchyme	SLC39A13	24.4232	2.7981	5.75364e-79	7.52042e-78
mesenchyme	NREP	24.4116	3.04216	7.54695e-79	9.82354e-78
mesenchyme	PEA15	24.3732	2.40377	6.20541e-80	8.2065e-79
mesenchyme	COPZ2	24.3611	4.96279	4.20466e-77	5.37068e-76
mesenchyme	TRAM2	24.3292	4.35076	3.6253e-77	4.64198e-76
mesenchyme	RAP1B	24.3266	1.45949	8.8425e-82	1.19146e-80
mesenchyme	LRRC32	24.3043	9.09615	1.60086e-76	2.03323e-75
mesenchyme	MYL6	24.251	0.896387	2.59298e-88	3.78257e-87
mesenchyme	SH2B3	24.2288	5.10613	1.51711e-76	1.92843e-75
mesenchyme	LOX	24.1231	6.84893	6.53146e-76	8.23562e-75
mesenchyme	ASAP1	24.0479	2.11544	8.08036e-79	1.05092e-77
mesenchyme	UBE2J1	23.9228	1.92986	1.05936e-78	1.37551e-77
mesenchyme	TGFB3	23.8697	5.68074	5.0182e-75	6.25225e-74
mesenchyme	PMM1	23.8457	3.25761	3.13279e-76	3.9661e-75
mesenchyme	C11orf96	23.7814	6.56934	1.29869e-74	1.60912e-73
mesenchyme	PDGFA	23.5539	2.54566	2.89793e-76	3.67172e-75
mesenchyme	SH3GLB1	23.4847	1.19253	6.87366e-81	9.19082e-80
mesenchyme	AK5	23.4372	6.24426	2.77251e-73	3.38453e-72
mesenchyme	PHLDB1	23.3758	2.52694	8.62316e-76	1.08644e-74
mesenchyme	PALLD	23.3749	1.91882	1.439e-77	1.84858e-76
mesenchyme	COL7A1	23.3344	3.74111	9.70918e-74	1.19359e-72
mesenchyme	MYO1D	23.176	2.02713	3.556e-75	4.44105e-74
mesenchyme	CKAP4	23.1442	2.02982	1.53207e-74	1.8968e-73
mesenchyme	ITPRIPL2	23.1323	2.33555	5.62772e-74	6.94557e-73
mesenchyme	ITGAV	23.059	1.57102	4.01092e-78	5.16945e-77
mesenchyme	ARHGDIB	23.044	5.6095	9.13002e-72	1.09081e-70
mesenchyme	WDR1	23.021	1.27646	3.13676e-78	4.05277e-77
mesenchyme	ITGB1BP1	23.0047	1.6299	4.88292e-76	6.1718e-75
mesenchyme	TIMP3	22.9737	4.0495	3.29e-72	3.95782e-71
mesenchyme	LRRC59	22.9588	1.46242	9.76818e-76	1.22873e-74
mesenchyme	KLF9	22.9269	2.8955	1.03516e-72	1.25489e-71
mesenchyme	COL16A1	22.9129	4.24031	1.48277e-71	1.76484e-70
mesenchyme	THY1	22.8789	9.12173	6.02615e-71	7.11321e-70
mesenchyme	GYPC	22.8144	7.34772	8.98832e-71	1.05621e-69
mesenchyme	GPC1	22.6313	2.49157	6.03586e-72	7.22235e-71
mesenchyme	KCNE4	22.5443	9.23818	1.24074e-69	1.43018e-68
mesenchyme	DNAJB4	22.5386	3.68544	3.40636e-70	3.97603e-69
mesenchyme	CHCHD10	22.4587	1.4673	4.92127e-76	6.21528e-75
mesenchyme	SEMA5A	22.3801	3.67375	8.98109e-70	1.03981e-68
mesenchyme	CYTH3	22.3495	4.38564	2.628e-69	3.00717e-68
mesenchyme	TMEM45A	22.2755	2.16442	1.56981e-72	1.89718e-71
mesenchyme	CCDC80	22.2545	4.85023	7.16415e-69	8.13265e-68
mesenchyme	TMEM30A	22.2496	1.474	8.70581e-73	1.05619e-71
mesenchyme	SEC31A	22.2092	1.19482	3.05981e-73	3.72945e-72
mesenchyme	CARMN	22.176	8.59733	3.5329e-68	3.97603e-67
mesenchyme	OAT	22.1616	2.01564	1.33455e-71	1.59204e-70
mesenchyme	TWSG1	22.1417	2.51299	8.17676e-70	9.47382e-69
mesenchyme	GOLT1B	22.0825	2.03465	2.4335e-70	2.8447e-69
mesenchyme	TUBA1A	22.0473	1.95231	5.6174e-77	7.16355e-76
mesenchyme	RSU1	22.0281	1.84613	1.13599e-70	1.3329e-69
mesenchyme	IFI16	22.0191	3.31958	6.8484e-69	7.77984e-68
mesenchyme	ARHGDIA	22.0102	1.33535	4.27361e-72	5.12539e-71
mesenchyme	AKAP12	22.0051	2.33621	1.04294e-73	1.28012e-72
mesenchyme	LAYN	21.9855	7.31419	1.81875e-67	2.02511e-66
mesenchyme	FAM89A	21.9843	3.17291	2.93225e-68	3.30478e-67
mesenchyme	FKBP7	21.9721	2.42241	2.91405e-69	3.3224e-68
mesenchyme	TBC1D1	21.9631	2.05538	9.47733e-70	1.09565e-68
mesenchyme	CLTC	21.8618	1.06748	3.95503e-73	4.81313e-72
mesenchyme	F2R	21.8534	3.57591	1.34955e-67	1.50588e-66
mesenchyme	TWIST2	21.8314	5.92831	5.54859e-67	6.13037e-66
mesenchyme	MEF2C	21.8138	5.60889	6.49387e-67	7.16973e-66
mesenchyme	GULP1	21.8042	2.39016	2.84673e-69	3.25037e-68
mesenchyme	ORAI2	21.742	2.03642	9.60553e-70	1.10965e-68
mesenchyme	PHTF2	21.7188	3.72035	4.68771e-67	5.18288e-66
mesenchyme	AKT3	21.7098	5.95632	1.75348e-66	1.92515e-65
mesenchyme	CFL1	21.7057	0.715062	2.50012e-73	3.05439e-72
mesenchyme	STX2	21.6987	2.55158	3.06305e-68	3.44972e-67
mesenchyme	ANKRD28	21.5574	3.03037	9.75834e-67	1.07438e-65
mesenchyme	COTL1	21.5466	2.30013	1.01043e-67	1.13069e-66
mesenchyme	HK1	21.524	2.27722	4.56721e-68	5.13272e-67
mesenchyme	RNH1	21.5206	1.30629	2.76222e-69	3.15846e-68
mesenchyme	OAZ1	21.4818	0.669658	9.0212e-71	1.05928e-69
mesenchyme	ELK3	21.4634	2.5074	3.35294e-67	3.71495e-66
mesenchyme	HRAS	21.4261	1.51417	1.28749e-69	1.48298e-68
mesenchyme	PDLIM3	21.4217	7.19843	3.24175e-65	3.50283e-64
mesenchyme	TMX3	21.4112	2.14979	1.53599e-67	1.7127e-66
mesenchyme	FKBP14	21.3375	2.41995	1.46015e-66	1.60534e-65
mesenchyme	PLXDC1	21.3183	8.65273	9.10898e-65	9.78203e-64
mesenchyme	B2M	21.3159	0.821126	1.92709e-74	2.38398e-73
mesenchyme	OSTM1	21.2327	2.53336	6.29636e-66	6.88873e-65
mesenchyme	COX7A2L	21.2175	0.945134	3.58395e-70	4.18021e-69
mesenchyme	BPGM	21.2122	2.38809	2.9421e-66	3.22789e-65
mesenchyme	FZD7	21.2002	4.29817	1.14597e-64	1.22812e-63
mesenchyme	REEP3	21.1723	1.27245	4.98004e-69	5.66967e-68
mesenchyme	IGF2R	21.1492	1.468	2.13114e-67	2.36959e-66
mesenchyme	C3orf80	21.1372	8.36761	4.76166e-64	5.05134e-63
mesenchyme	ACTR2	21.0911	1.10289	3.83309e-69	4.36706e-68
mesenchyme	CFL2	21.0893	2.23275	7.61858e-66	8.31796e-65
mesenchyme	ARHGAP22	21.0498	6.99643	9.61805e-64	1.01212e-62
mesenchyme	SH3KBP1	21.0491	1.74311	1.28736e-66	1.41637e-65
mesenchyme	TBX3	21.0045	2.76768	1.58268e-64	1.69153e-63
mesenchyme	LAMB2	21.0033	1.89017	5.58361e-66	6.11317e-65
mesenchyme	CBLB	20.978	3.19365	3.23476e-64	3.44084e-63
mesenchyme	SERP1	20.9178	0.87643	5.15083e-69	5.85986e-68
mesenchyme	NIN	20.8879	2.37989	7.55607e-65	8.12549e-64
mesenchyme	LRRFIP2	20.8878	1.74339	1.78612e-65	1.94065e-64
mesenchyme	VCL	20.8784	1.62235	3.15706e-67	3.50039e-66
mesenchyme	ETS1	20.8136	2.90318	6.58361e-64	6.95596e-63
mesenchyme	ZEB2	20.805	8.15079	9.81031e-63	1.01938e-61
mesenchyme	PAM	20.7196	1.89751	3.25264e-65	3.51218e-64
mesenchyme	TSC22D3	20.7031	2.4528	7.09846e-64	7.49488e-63
mesenchyme	BACE1	20.6878	2.52212	1.11875e-63	1.17649e-62
mesenchyme	YKT6	20.6404	1.93429	1.65369e-64	1.76622e-63
mesenchyme	LIMS1	20.5759	1.24233	3.90243e-67	4.32073e-66
mesenchyme	ITGA11	20.5727	6.56836	7.56532e-62	7.7584e-61
mesenchyme	RBMS1	20.5244	1.74957	1.31433e-64	1.40664e-63
mesenchyme	SNAPC2	20.4644	2.35108	6.61759e-63	6.88993e-62
mesenchyme	PLOD1	20.3885	1.58226	2.72216e-64	2.89755e-63
mesenchyme	MTCH1	20.3704	1.10356	1.06629e-65	1.16095e-64
mesenchyme	UBA5	20.3516	1.7765	3.66237e-63	3.82576e-62
mesenchyme	LINC00632	20.3261	5.65372	5.6462e-61	5.72306e-60
mesenchyme	HSD11B1	20.2205	4.73615	8.59575e-61	8.68475e-60
mesenchyme	WLS	20.2144	1.57378	9.21909e-64	9.70785e-63
mesenchyme	MTMR2	20.212	2.12657	1.78621e-62	1.84626e-61
mesenchyme	LBH	20.207	2.00395	7.40461e-65	7.96807e-64
mesenchyme	DGKI	20.1709	7.37118	3.33753e-60	3.3484e-59
mesenchyme	SULF1	20.1527	7.68506	4.10053e-60	4.10863e-59
mesenchyme	CERCAM	20.149	5.48078	3.16842e-60	3.18077e-59
mesenchyme	PPIB	20.1443	0.749977	1.02052e-62	1.05971e-61
mesenchyme	SEC11A	20.0853	0.749697	1.32879e-64	1.42115e-63
mesenchyme	PFN1	20.0362	0.735372	2.01221e-64	2.14623e-63
mesenchyme	MYO5A	19.9904	3.10947	2.59391e-60	2.60568e-59
mesenchyme	SYDE1	19.9777	5.6763	1.55895e-59	1.54626e-58
mesenchyme	SSR2	19.9606	0.830081	1.16323e-62	1.2063e-61
mesenchyme	SEC23A	19.9531	1.65196	6.47863e-62	6.65267e-61
mesenchyme	SIRT2	19.9129	2.44515	1.83078e-60	1.84263e-59
mesenchyme	PLS3	19.9126	1.35594	2.37401e-62	2.44899e-61
mesenchyme	PKIA	19.8951	5.81667	3.47295e-59	3.42535e-58
mesenchyme	AMOTL1	19.8533	3.1952	9.85175e-60	9.79006e-59
mesenchyme	UBTD1	19.8481	2.2767	1.72802e-60	1.74032e-59
mesenchyme	FOXD1	19.8279	8.28401	8.30581e-59	8.14052e-58
mesenchyme	PHGDH	19.8008	3.67972	3.47309e-59	3.42535e-58
mesenchyme	RGS3	19.7938	2.30821	6.1759e-60	6.1606e-59
mesenchyme	SLC1A5	19.7689	2.9441	2.63741e-59	2.60606e-58
mesenchyme	KCTD12	19.671	5.70461	2.86329e-58	2.78891e-57
mesenchyme	REXO2	19.6702	1.0372	4.42747e-62	4.55235e-61
mesenchyme	MTDH	19.6585	0.791657	1.61788e-62	1.67387e-61
mesenchyme	COLGALT1	19.6346	2.64463	4.99501e-59	4.91092e-58
mesenchyme	CD109	19.6302	1.95884	5.52177e-60	5.5151e-59
mesenchyme	BMP1	19.6084	1.54632	8.52903e-62	8.741e-61
mesenchyme	PPIC	19.5375	1.02228	8.01922e-63	8.34371e-62
mesenchyme	LYST	19.502	3.42047	6.59095e-58	6.38412e-57
mesenchyme	PHLDA3	19.4962	1.47273	3.77783e-60	3.78772e-59
mesenchyme	PLPP4	19.4939	2.9803	8.17442e-59	8.01675e-58
mesenchyme	BCAR1	19.4882	1.80977	2.12689e-59	2.10426e-58
mesenchyme	PARVB	19.4417	2.67722	2.62305e-58	2.5565e-57
mesenchyme	ETV1	19.3503	2.04307	1.23573e-58	1.20963e-57
mesenchyme	TMEM165	19.3472	1.15885	1.06925e-60	1.07963e-59
mesenchyme	PHC2	19.3192	1.41869	1.92052e-59	1.90128e-58
mesenchyme	CD4	19.2822	9.73884	1.33637e-56	1.27093e-55
mesenchyme	B3GAT3	19.2819	1.68569	1.45481e-58	1.42231e-57
mesenchyme	PRKG1	19.2607	8.76616	1.61343e-56	1.53164e-55
mesenchyme	NTAN1	19.2539	1.49445	1.45577e-59	1.44574e-58
mesenchyme	GPNMB	19.2465	5.00502	1.40346e-56	1.33312e-55
mesenchyme	PRDM1	19.2465	4.76337	1.13519e-56	1.08156e-55
mesenchyme	IRF2BPL	19.2019	2.12831	5.7051e-58	5.53289e-57
mesenchyme	ENTPD1	19.142	7.43652	4.7047e-56	4.43937e-55
mesenchyme	JAM3	19.113	9.86793	6.41169e-56	6.04283e-55
mesenchyme	PRDX4	19.1001	0.906345	4.74137e-60	4.74469e-59
mesenchyme	HAS2	19.0542	7.20193	1.04822e-55	9.84376e-55
mesenchyme	FKBP5	19.0497	1.85588	6.15106e-58	5.96171e-57
mesenchyme	ADCY3	18.9926	6.12181	1.67875e-55	1.5718e-54
mesenchyme	CD82	18.9227	2.51442	4.22508e-56	3.99159e-55
mesenchyme	ECE1	18.894	1.63089	6.64678e-58	6.43423e-57
mesenchyme	STRAP	18.8794	1.00172	1.78662e-59	1.76984e-58
mesenchyme	CACNA2D1	18.8652	8.67352	6.20677e-55	5.78378e-54
mesenchyme	XYLT1	18.8016	4.69137	6.82627e-55	6.35729e-54
mesenchyme	SH3PXD2A	18.7949	2.75859	2.11359e-55	1.97776e-54
mesenchyme	GEM	18.7913	5.06044	8.69492e-55	8.0784e-54
mesenchyme	MDFIC	18.7777	2.26007	7.18116e-56	6.75993e-55
mesenchyme	UBE2E1	18.7666	1.41968	5.52322e-57	5.28795e-56
mesenchyme	HOXB5	18.7571	9.67965	1.73697e-54	1.60527e-53
mesenchyme	IGFBP5	18.7282	4.99584	1.27204e-54	1.17836e-53
mesenchyme	SRI	18.6835	1.30004	5.34136e-58	5.18333e-57
mesenchyme	MAP7D1	18.6817	1.60725	1.06964e-56	1.02096e-55
mesenchyme	OXCT1	18.6798	3.29413	1.03318e-54	9.58793e-54
mesenchyme	CALM1	18.6747	0.70439	1.64104e-59	1.62665e-58
mesenchyme	CRISPLD2	18.6299	7.05682	5.35945e-54	4.92124e-53
mesenchyme	CCSER2	18.6199	1.73167	5.74198e-56	5.4149e-55
mesenchyme	TMEM263	18.617	1.40909	2.13661e-56	2.02585e-55
mesenchyme	PSAP	18.5739	0.962646	9.04401e-57	8.63772e-56
mesenchyme	SOD3	18.5236	3.16392	3.45196e-54	3.17528e-53
mesenchyme	IFFO1	18.521	3.96811	6.29067e-54	5.76957e-53
mesenchyme	COL8A1	18.4968	9.03788	1.91982e-53	1.74854e-52
mesenchyme	PXK	18.4436	3.36909	1.04106e-53	9.49279e-53
mesenchyme	MEIS3	18.3829	5.99183	4.4771e-53	4.05183e-52
mesenchyme	CD248	18.2982	8.55582	1.21263e-52	1.09116e-51
mesenchyme	CRIP2	18.2133	1.86858	2.43769e-54	2.25021e-53
mesenchyme	MIR4435-2HG	18.1747	1.78239	7.18449e-54	6.57399e-53
mesenchyme	MYLK	18.164	2.63373	5.60103e-53	5.05734e-52
mesenchyme	GLI3	18.1478	7.61321	4.69373e-52	4.17336e-51
mesenchyme	GUCY1A2	18.1431	7.71527	4.96748e-52	4.41425e-51
mesenchyme	MTHFD2	18.1177	2.84204	1.4285e-52	1.2832e-51
mesenchyme	FMNL3	18.0318	7.85	1.40945e-51	1.23709e-50
mesenchyme	FAM180A	18.0274	8.87844	1.49827e-51	1.31357e-50
mesenchyme	JDP2	18.0119	2.76657	3.4167e-52	3.04826e-51
mesenchyme	RABAC1	17.97	0.84307	6.18988e-55	5.77147e-54
mesenchyme	P4HA3	17.9678	4.70243	1.62154e-51	1.42086e-50
mesenchyme	CHSY1	17.964	2.68438	4.44713e-52	3.95857e-51
mesenchyme	SCPEP1	17.9228	2.29304	3.85624e-52	3.43649e-51
mesenchyme	S1PR3	17.9106	6.41972	4.07456e-51	3.53872e-50
mesenchyme	PCDH18	17.8691	10.4042	6.58893e-51	5.70665e-50
mesenchyme	CDC42EP5	17.7982	4.53877	6.83967e-51	5.92055e-50
mesenchyme	COPA	17.7932	1.0206	1.66859e-53	1.52061e-52
mesenchyme	CYBRD1	17.7432	4.35492	1.18504e-50	1.02241e-49
mesenchyme	PMP22	17.7409	2.42427	9.124e-52	8.04869e-51
mesenchyme	ARPC4	17.7396	0.969039	3.15559e-53	2.85914e-52
mesenchyme	PKM	17.7331	0.802714	9.42791e-59	9.23454e-58
mesenchyme	DYRK3	17.7096	3.05544	7.55168e-51	6.5261e-50
mesenchyme	ATP6AP2	17.697	0.962488	2.47687e-53	2.24677e-52
mesenchyme	TEAD1	17.6872	1.52085	5.8693e-52	5.198e-51
mesenchyme	CYB5R3	17.671	1.11128	1.30834e-52	1.17593e-51
mesenchyme	YIPF5	17.664	1.10313	4.02476e-53	3.64456e-52
mesenchyme	ZYX	17.6625	1.4001	1.69529e-52	1.51938e-51
mesenchyme	SSC5D	17.6353	7.27349	5.30281e-50	4.53771e-49
mesenchyme	MAGED2	17.6309	1.1993	1.97108e-52	1.76554e-51
mesenchyme	MRAS	17.6156	4.53558	4.26327e-50	3.66213e-49
mesenchyme	IQGAP1	17.6077	1.10368	1.1396e-54	1.05692e-53
mesenchyme	P3H4	17.5935	1.98311	3.53241e-51	3.07467e-50
mesenchyme	HACD1	17.5847	2.30109	1.01387e-50	8.75214e-50
mesenchyme	RAB7A	17.5542	0.996814	2.88221e-52	2.57433e-51
mesenchyme	HM13	17.5428	0.932596	6.36655e-52	5.62886e-51
mesenchyme	MORF4L1	17.5321	0.699804	6.34661e-53	5.72726e-52
mesenchyme	PARVA	17.5214	1.34562	1.02152e-51	8.9961e-51
mesenchyme	SLC25A37	17.4958	1.97007	1.62654e-50	1.40255e-49
mesenchyme	ATP10D	17.3371	2.98707	2.63572e-49	2.22993e-48
mesenchyme	TMEM200A	17.3311	6.76053	8.7752e-49	7.3647e-48
mesenchyme	DOK5	17.2918	6.82588	1.26207e-48	1.05358e-47
mesenchyme	TXNDC15	17.2866	1.61175	4.38506e-50	3.76262e-49
mesenchyme	POSTN	17.2794	9.29551	1.55075e-48	1.28977e-47
mesenchyme	HABP4	17.2438	2.21013	1.96338e-49	1.66649e-48
mesenchyme	MSC-AS1	17.2288	7.36876	2.26024e-48	1.87391e-47
mesenchyme	SHC1	17.2025	1.72249	1.23926e-49	1.05472e-48
mesenchyme	RAB23	17.1991	3.26994	1.21952e-48	1.0186e-47
mesenchyme	ATP2B4	17.16	2.09	2.54454e-49	2.15395e-48
mesenchyme	SNX18	17.1491	2.27232	7.62891e-49	6.41981e-48
mesenchyme	UQCRC1	17.1269	1.08198	5.12456e-50	4.38757e-49
mesenchyme	MPRIP	17.1213	1.43271	9.49657e-50	8.10433e-49
mesenchyme	NRP1	17.1211	1.53116	1.8903e-49	1.60619e-48
mesenchyme	HEYL	17.0951	8.61722	8.47112e-48	6.92455e-47
mesenchyme	MFGE8	17.0811	1.43305	3.81376e-50	3.27779e-49
mesenchyme	VAT1	17.0781	1.60838	3.16762e-49	2.6785e-48
mesenchyme	CAMK2D	17.0743	1.65291	4.18307e-49	3.52955e-48
mesenchyme	MAP1LC3A	17.018	1.75643	7.23123e-49	6.08841e-48
mesenchyme	DAPK3	16.9966	2.06415	1.84947e-48	1.53578e-47
mesenchyme	CAMK4	16.9782	8.28646	2.46732e-47	1.99918e-46
mesenchyme	LMAN1	16.9696	0.922582	1.63295e-49	1.38903e-48
mesenchyme	PRR16	16.964	9.42448	2.84838e-47	2.30674e-46
mesenchyme	FADS1	16.9404	1.75925	9.49062e-49	7.95238e-48
mesenchyme	RECQL	16.923	1.48934	9.98731e-49	8.36411e-48
mesenchyme	FGFR1OP2	16.8936	1.4425	1.12649e-48	9.424e-48
mesenchyme	ST3GAL4	16.8629	3.42134	3.00482e-47	2.43219e-46
mesenchyme	FEZ1	16.8561	7.82375	7.54138e-47	6.0543e-46
mesenchyme	GJC1	16.8512	4.74533	5.48623e-47	4.41343e-46
mesenchyme	PKN1	16.8234	2.53794	1.99048e-47	1.61698e-46
mesenchyme	DNM3OS	16.8158	9.09253	1.11838e-46	8.951e-46
mesenchyme	STARD4	16.8088	2.19525	1.71932e-47	1.3996e-46
mesenchyme	METRN	16.8054	1.60873	6.05438e-48	4.96972e-47
mesenchyme	NES	16.798	3.40755	5.36936e-47	4.32162e-46
mesenchyme	RIN2	16.7713	2.18903	2.20285e-47	1.78857e-46
mesenchyme	SLC1A3	16.7267	6.93692	2.4555e-46	1.95333e-45
mesenchyme	RAP1A	16.7151	1.03463	9.09057e-49	7.62531e-48
mesenchyme	BNIP2	16.7099	1.49998	6.95183e-48	5.69745e-47
mesenchyme	SLC39A7	16.7007	0.937897	1.17302e-48	9.80286e-48
mesenchyme	UBE2V2	16.6186	1.05686	5.22711e-48	4.29514e-47
mesenchyme	NKD1	16.6076	1.33158	4.48936e-48	3.69086e-47
mesenchyme	NR2F2	16.6005	1.47966	5.08059e-47	4.09339e-46
mesenchyme	ITGB5	16.5885	1.23062	8.76025e-48	7.15344e-47
mesenchyme	SYNE1	16.5848	2.56736	2.07998e-46	1.65629e-45
mesenchyme	FJX1	16.5694	2.92205	4.15297e-46	3.29532e-45
mesenchyme	ANXA1	16.566	1.36428	1.09913e-49	9.3647e-49
mesenchyme	PLXNB2	16.5542	1.22555	2.37117e-47	1.92326e-46
mesenchyme	ARHGAP24	16.539	3.46327	7.04085e-46	5.55874e-45
mesenchyme	SPCS3	16.5315	0.955404	3.25718e-48	2.69051e-47
mesenchyme	FAM50A	16.529	0.979502	4.38316e-48	3.60544e-47
mesenchyme	COBLL1	16.5106	1.80075	1.7444e-46	1.38977e-45
mesenchyme	DRAP1	16.4608	0.880724	7.6943e-48	6.2961e-47
mesenchyme	PLXND1	16.4374	4.43752	2.4621e-45	1.92928e-44
mesenchyme	PLCB4	16.4329	7.89782	3.78868e-45	2.95243e-44
mesenchyme	ASPH	16.4176	0.926663	1.9146e-47	1.55615e-46
mesenchyme	TUSC1	16.414	2.2535	6.44727e-46	5.10035e-45
mesenchyme	HOXB3	16.412	10.6163	4.70082e-45	3.65255e-44
mesenchyme	NPR3	16.3811	6.9448	5.90809e-45	4.57928e-44
mesenchyme	HSPA5	16.3636	0.934431	9.04957e-47	7.25767e-46
mesenchyme	EIF5A	16.3529	0.848755	8.5328e-47	6.84673e-46
mesenchyme	KLHL42	16.3394	2.24697	1.58411e-45	1.24439e-44
mesenchyme	TPD52L2	16.3318	1.44337	3.95591e-46	3.14054e-45
mesenchyme	STK17B	16.3064	2.9878	4.45056e-45	3.45981e-44
mesenchyme	RASSF1	16.2507	2.18141	2.97998e-45	2.33043e-44
mesenchyme	SRA1	16.2403	1.08222	2.84966e-46	2.26459e-45
mesenchyme	FYN	16.2396	2.08694	3.47284e-45	2.70912e-44
mesenchyme	MED13L	16.2336	1.59911	1.44322e-45	1.13429e-44
mesenchyme	CORO1C	16.2229	1.40918	6.95288e-46	5.49204e-45
mesenchyme	SRGN	16.2096	8.48518	2.96877e-44	2.26639e-43
mesenchyme	SNX9	16.1951	1.62034	3.05997e-45	2.3918e-44
mesenchyme	NCS1	16.194	2.10324	4.02915e-45	3.13687e-44
mesenchyme	CCDC74A	16.1913	3.24315	1.38836e-44	1.06767e-43
mesenchyme	PPP1R12A	16.1845	1.13816	6.34551e-46	5.02239e-45
mesenchyme	EML1	16.1816	3.41177	1.767e-44	1.35553e-43
mesenchyme	FKBP1A	16.1721	0.853181	7.27375e-47	5.84243e-46
mesenchyme	SCARF2	16.1709	6.81657	3.77091e-44	2.87317e-43
mesenchyme	GOLIM4	16.1594	1.1571	9.40468e-46	7.42124e-45
mesenchyme	WDR41	16.1416	1.9706	6.56331e-45	5.08462e-44
mesenchyme	PTGIR	16.1407	8.8166	5.64529e-44	4.28469e-43
mesenchyme	BOD1	16.1072	1.39857	3.06719e-45	2.39625e-44
mesenchyme	MAZ	16.0855	1.14878	1.3882e-45	1.09159e-44
mesenchyme	PRAF2	16.0436	2.22295	2.12735e-44	1.63038e-43
mesenchyme	HIC1	16.0268	6.39296	1.49432e-43	1.12655e-42
mesenchyme	SEC61A1	16.0259	0.943275	1.1941e-45	9.40376e-45
mesenchyme	LSM10	16.0231	1.18913	4.12564e-45	3.2104e-44
mesenchyme	TNFRSF19	15.994	2.98005	8.34434e-44	6.31188e-43
mesenchyme	HSPA13	15.9793	2.11471	4.05382e-44	3.08723e-43
mesenchyme	SURF4	15.9408	0.887043	2.07631e-45	1.6286e-44
mesenchyme	CCNI	15.9371	0.692928	1.20986e-46	9.67826e-46
mesenchyme	PIP4K2A	15.9294	2.04347	4.98401e-44	3.78829e-43
mesenchyme	HOXB-AS1	15.9229	8.71751	4.18239e-43	3.12308e-42
mesenchyme	CHST11	15.8902	2.88466	1.63025e-43	1.22843e-42
mesenchyme	MED8	15.8897	1.18896	9.83547e-45	7.5971e-44
mesenchyme	PTPN13	15.8657	2.94125	2.44521e-43	1.83636e-42
mesenchyme	TCEAL8	15.8653	1.01843	5.54389e-45	4.30124e-44
mesenchyme	MORF4L2	15.8652	0.859475	1.30076e-44	1.00128e-43
mesenchyme	SMARCB1	15.8383	1.15789	2.23933e-44	1.71369e-43
mesenchyme	ZNF503	15.7352	1.82867	2.67828e-43	2.00948e-42
mesenchyme	FBLN5	15.7303	6.98781	2.38169e-42	1.76337e-41
mesenchyme	NOTCH2	15.72	1.67224	2.13378e-43	1.60401e-42
mesenchyme	TNFAIP8L3	15.7159	7.51084	2.73526e-42	2.02324e-41
mesenchyme	PDZRN3	15.6446	8.37562	5.30822e-42	3.90987e-41
mesenchyme	HOXB7	15.6254	9.78996	6.44434e-42	4.73338e-41
mesenchyme	UBE2M	15.6183	1.00777	1.03152e-43	7.79143e-43
mesenchyme	CALR	15.6162	0.748675	1.70478e-43	1.28336e-42
mesenchyme	AKR1B1	15.6155	1.67686	8.35712e-43	6.21974e-42
mesenchyme	MYOF	15.6125	1.30253	6.79475e-44	5.14221e-43
mesenchyme	E2F7	15.6104	5.24744	6.16419e-42	4.53397e-41
mesenchyme	GNB1	15.6008	0.8315	2.2843e-44	1.74641e-43
mesenchyme	MCUR1	15.5871	1.21316	2.26398e-43	1.70107e-42
mesenchyme	MSC	15.5849	6.39443	8.42056e-42	6.16475e-41
mesenchyme	HECW2	15.5806	6.17608	9.05485e-42	6.62602e-41
mesenchyme	TRPS1	15.5261	1.82748	1.63834e-42	1.2153e-41
mesenchyme	CNPY4	15.5154	2.31212	3.83654e-42	2.83251e-41
mesenchyme	METTL9	15.5035	1.03106	2.58605e-43	1.94121e-42
mesenchyme	PTP4A2	15.4923	0.76689	6.05542e-44	4.59376e-43
mesenchyme	CNRIP1	15.4901	10.1086	2.22491e-41	1.61682e-40
mesenchyme	VKORC1	15.442	0.845056	4.60588e-43	3.43767e-42
mesenchyme	DOCK10	15.4165	10.3728	4.36035e-41	3.14678e-40
mesenchyme	MMP19	15.4017	5.69617	4.45764e-41	3.21552e-40
mesenchyme	HOXB6	15.3947	9.32868	5.29663e-41	3.81547e-40
mesenchyme	VEGFC	15.3895	10.1342	5.56561e-41	4.00555e-40
mesenchyme	SPOCD1	15.3811	6.02528	5.43958e-41	3.91665e-40
mesenchyme	MYO9B	15.3612	2.17421	1.74219e-41	1.27014e-40
mesenchyme	IMPDH1	15.3608	2.31928	1.80603e-41	1.31607e-40
mesenchyme	CRYAB	15.3321	2.35902	2.69893e-41	1.95495e-40
mesenchyme	COPRS	15.3313	1.05947	3.28245e-42	2.42457e-41
mesenchyme	PYCR1	15.3082	2.09027	2.57511e-41	1.86957e-40
mesenchyme	CALHM2	15.3006	8.08423	1.22976e-40	8.78616e-40
mesenchyme	MAGEH1	15.2869	2.09317	2.9963e-41	2.16935e-40
mesenchyme	ERCC1	15.2764	1.25803	7.97825e-42	5.84365e-41
mesenchyme	ARF1	15.2556	0.658933	1.71965e-42	1.27501e-41
mesenchyme	GANAB	15.2485	1.14913	6.30034e-42	4.63194e-41
mesenchyme	C14orf132	15.2417	4.66398	1.71113e-40	1.22087e-39
mesenchyme	LRP12	15.212	2.62378	9.75004e-41	6.97872e-40
mesenchyme	FKBP9	15.2054	1.77592	3.40828e-41	2.46535e-40
mesenchyme	CDK4	15.1971	1.1381	1.58722e-41	1.1577e-40
mesenchyme	UGP2	15.1818	1.02848	1.92218e-41	1.39941e-40
mesenchyme	DNAJC10	15.1736	1.05274	5.22073e-42	3.84723e-41
mesenchyme	DUBR	15.1505	3.98018	3.25405e-40	2.31436e-39
mesenchyme	SBDS	15.15	0.760104	6.3213e-42	4.64518e-41
mesenchyme	KRR1	15.137	1.03776	3.17332e-41	2.29645e-40
mesenchyme	HTRA3	15.114	9.22647	6.84396e-40	4.83913e-39
mesenchyme	SYNE3	15.0961	5.0747	6.92171e-40	4.8919e-39
mesenchyme	ADAM19	15.0809	2.71778	3.20293e-40	2.28008e-39
mesenchyme	RRP36	15.0728	1.01152	2.39628e-41	1.74054e-40
mesenchyme	RNF152	15.0564	2.60944	4.26733e-40	3.02956e-39
mesenchyme	CDK15	15.0271	10.0783	1.51465e-39	1.06377e-38
mesenchyme	FGFR1	15.0159	1.97481	3.25898e-40	2.31682e-39
mesenchyme	OXR1	15.0077	1.23618	6.06861e-41	4.35758e-40
mesenchyme	ITGA10	14.9811	5.88189	2.13358e-39	1.49313e-38
mesenchyme	IFRD1	14.9737	1.69159	2.58151e-40	1.83853e-39
mesenchyme	CHST2	14.8979	5.03929	3.94538e-39	2.7537e-38
mesenchyme	ROBO1	14.8756	1.87488	8.37172e-40	5.90606e-39
mesenchyme	FADS2	14.8682	1.5893	5.85419e-40	4.14303e-39
mesenchyme	TIMM17A	14.8626	0.989179	2.31679e-40	1.6515e-39
mesenchyme	CCDC102B	14.8486	6.40211	7.29367e-39	5.06815e-38
mesenchyme	GREM2	14.8469	8.06514	7.69339e-39	5.33646e-38
mesenchyme	PICALM	14.8431	1.19857	4.46791e-40	3.17052e-39
mesenchyme	GAS1	14.841	7.70728	8.00882e-39	5.55035e-38
mesenchyme	RBFOX2	14.8372	1.03965	1.37293e-40	9.80015e-40
mesenchyme	SOCS2	14.8322	4.68242	7.33422e-39	5.09407e-38
mesenchyme	MIR22HG	14.8278	1.51368	8.70886e-40	6.14115e-39
mesenchyme	KLF6	14.8153	0.971696	3.75929e-41	2.718e-40
mesenchyme	DSE	14.7896	1.9432	1.69004e-39	1.18642e-38
mesenchyme	CD63	14.7719	0.577192	9.17233e-41	6.56821e-40
mesenchyme	MEF2D	14.7606	2.50446	6.04602e-39	4.2105e-38
mesenchyme	TUBB	14.733	0.810659	5.7706e-41	4.15119e-40
mesenchyme	TWF2	14.7311	1.15138	1.165e-39	8.20407e-39
mesenchyme	TSPAN9	14.7297	2.31117	7.45967e-39	5.17663e-38
mesenchyme	EIF4EBP1	14.7077	1.01566	1.46258e-39	1.02767e-38
mesenchyme	PGF	14.6368	6.02316	4.7921e-38	3.27342e-37
mesenchyme	PLAC9	14.6141	8.72637	6.3778e-38	4.33773e-37
mesenchyme	COMMD8	14.585	1.16028	3.6318e-39	2.53709e-38
mesenchyme	UAP1L1	14.5772	3.28581	5.0656e-38	3.45574e-37
mesenchyme	CTSC	14.5092	1.03994	5.85493e-39	4.07924e-38
mesenchyme	FAM98A	14.4962	1.20735	9.97431e-39	6.90337e-38
mesenchyme	DYNC1H1	14.4911	0.890723	2.03846e-39	1.42719e-38
mesenchyme	GMFG	14.4906	7.55904	1.91944e-37	1.29761e-36
mesenchyme	ZNF532	14.4807	2.16254	4.93738e-38	3.36973e-37
mesenchyme	TBXA2R	14.477	10.2501	2.21002e-37	1.49212e-36
mesenchyme	TCF7	14.4629	1.86885	4.88475e-38	3.33526e-37
mesenchyme	DEK	14.4582	1.00152	1.53496e-38	1.05817e-37
mesenchyme	AHI1	14.4549	1.58253	3.87017e-38	2.64827e-37
mesenchyme	NAT14	14.4538	1.88835	5.22924e-38	3.56273e-37
mesenchyme	DESI2	14.4523	1.183	1.76744e-38	1.21684e-37
mesenchyme	RFTN1	14.45	3.43549	1.73188e-37	1.17131e-36
mesenchyme	TBX2-AS1	14.4437	8.66802	2.95688e-37	1.98953e-36
mesenchyme	SLC39A6	14.4401	1.19954	1.20225e-38	8.3136e-38
mesenchyme	APBB2	14.425	1.67525	4.16414e-38	2.84818e-37
mesenchyme	PMAIP1	14.4234	1.63408	3.20295e-38	2.19458e-37
mesenchyme	TMEM208	14.4131	0.734767	1.22821e-38	8.4894e-38
mesenchyme	ATXN1	14.3901	1.56045	6.95396e-38	4.72755e-37
mesenchyme	NAV1	14.3591	1.64095	5.56468e-38	3.78962e-37
mesenchyme	ATP6V0E1	14.3541	0.570919	7.25159e-39	5.04114e-38
mesenchyme	KIAA1549L	14.3509	5.46213	6.3362e-37	4.22351e-36
mesenchyme	SORBS3	14.33	2.091	2.32348e-37	1.56737e-36
mesenchyme	IL1R1	14.3261	2.05519	2.89232e-37	1.94692e-36
mesenchyme	RHEB	14.2979	0.892589	3.41868e-38	2.34136e-37
mesenchyme	EMD	14.2869	1.21226	9.76362e-38	6.62905e-37
mesenchyme	HEY1	14.2611	5.18071	1.27357e-36	8.43911e-36
mesenchyme	RUNX2	14.2524	3.28223	9.13394e-37	6.07293e-36
mesenchyme	MYO1C	14.25	1.11393	1.16638e-37	7.91578e-37
mesenchyme	ARID3A	14.2292	3.14765	1.08006e-36	7.16892e-36
mesenchyme	MGAT5	14.2246	1.68243	3.87529e-37	2.59304e-36
mesenchyme	LDB2	14.2049	6.47483	2.42397e-36	1.59744e-35
mesenchyme	NCOA3	14.1746	1.62192	6.57598e-37	4.38148e-36
mesenchyme	SLC52A2	14.1656	1.2464	2.83634e-37	1.91006e-36
mesenchyme	PHF19	14.1567	2.60372	1.6406e-36	1.08437e-35
mesenchyme	DCAF13	14.1287	1.0633	3.30266e-37	2.21843e-36
mesenchyme	RNF24	14.1268	2.11388	1.57591e-36	1.04205e-35
mesenchyme	LRRC17	14.0956	3.85181	3.51675e-36	2.31275e-35
mesenchyme	SH3PXD2B	14.094	2.06272	1.7567e-36	1.16013e-35
mesenchyme	ELOVL5	14.0899	1.27448	7.28188e-37	4.84769e-36
mesenchyme	EIF4H	14.0729	0.884689	3.85044e-37	2.57751e-36
mesenchyme	NR3C1	14.0615	1.48862	1.34517e-36	8.90599e-36
mesenchyme	DDX39A	14.0561	1.44536	1.21734e-36	8.0733e-36
mesenchyme	MLLT11	14.0529	1.82495	1.18565e-36	7.86646e-36
mesenchyme	TACC1	14.0398	1.265	9.29924e-37	6.18022e-36
mesenchyme	LRRC8C	14.038	3.78487	7.53186e-36	4.92234e-35
mesenchyme	CD81	14.0292	0.616482	6.24569e-37	4.16495e-36
mesenchyme	FXYD5	14.0231	0.986943	3.39239e-37	2.27768e-36
mesenchyme	ADAM12	13.9993	4.67181	1.37409e-35	8.93185e-35
mesenchyme	PPP1R14B	13.9967	0.574461	4.23877e-38	2.89797e-37
mesenchyme	SH3BGRL	13.9938	0.82471	4.72219e-37	3.15569e-36
mesenchyme	LRRC58	13.9524	1.398	3.47755e-36	2.28889e-35
mesenchyme	UACA	13.9404	1.64321	8.89106e-36	5.79857e-35
mesenchyme	ANTXR2	13.9357	1.56725	5.15051e-36	3.37588e-35
mesenchyme	CHPF2	13.9281	1.55685	5.60844e-36	3.67449e-35
mesenchyme	TPST1	13.9259	1.92729	7.43572e-36	4.86355e-35
mesenchyme	GNA12	13.919	1.64797	6.27063e-36	4.10491e-35
mesenchyme	FAT1	13.8688	0.937032	3.5135e-36	2.31158e-35
mesenchyme	C8orf88	13.8559	6.42205	5.52856e-35	3.54672e-34
mesenchyme	PHF20L1	13.8322	1.04264	5.02804e-36	3.29835e-35
mesenchyme	TOX2	13.8162	7.39228	8.05406e-35	5.15008e-34
mesenchyme	DYRK2	13.7993	1.59271	2.24087e-35	1.45061e-34
mesenchyme	KITLG	13.7947	2.25567	3.47676e-35	2.2405e-34
mesenchyme	SLC12A4	13.7898	1.7372	2.29073e-35	1.48227e-34
mesenchyme	RFTN2	13.7829	8.79918	1.1056e-34	7.04671e-34
mesenchyme	PTPDC1	13.7799	3.69513	7.99695e-35	5.11564e-34
mesenchyme	ATP8B2	13.778	3.94982	8.44225e-35	5.3961e-34
mesenchyme	SEC13	13.7501	0.793935	5.98342e-36	3.91853e-35
mesenchyme	NANS	13.7472	1.01682	1.07649e-35	7.01482e-35
mesenchyme	DIXDC1	13.7443	2.2719	5.48458e-35	3.51994e-34
mesenchyme	DAD1	13.7343	0.581237	1.18808e-35	7.73877e-35
mesenchyme	NT5E	13.719	1.36708	2.51121e-35	1.62361e-34
mesenchyme	PDE4A	13.6967	2.86222	1.2269e-34	7.81349e-34
mesenchyme	TTLL7	13.6892	4.0539	1.90129e-34	1.20643e-33
mesenchyme	KPNB1	13.6791	0.813965	1.20243e-35	7.829e-35
mesenchyme	TMEM109	13.6751	1.65786	6.09675e-35	3.90804e-34
mesenchyme	DCBLD1	13.6615	1.33691	1.91991e-35	1.24438e-34
mesenchyme	MXRA5	13.6496	5.1477	3.27054e-34	2.07024e-33
mesenchyme	CTDSP2	13.6311	1.30643	5.92822e-35	3.80156e-34
mesenchyme	ADGRA2	13.6291	7.74278	4.30083e-34	2.71585e-33
mesenchyme	UHRF2	13.6212	1.84381	1.26689e-34	8.06486e-34
mesenchyme	MAPRE2	13.6124	1.94428	1.54977e-34	9.85768e-34
mesenchyme	CSNK1E	13.5777	1.1688	6.13414e-35	3.9288e-34
mesenchyme	GNAI3	13.546	0.877119	3.66517e-35	2.35998e-34
mesenchyme	ELOVL4	13.5404	7.52367	9.4122e-34	5.91028e-33
mesenchyme	RASAL2	13.5368	1.41269	1.80957e-34	1.14916e-33
mesenchyme	SSR1	13.5333	0.719767	5.31355e-35	3.41297e-34
mesenchyme	HDAC9	13.5152	4.29236	9.28407e-34	5.83215e-33
mesenchyme	TNPO1	13.5148	1.05346	1.02962e-34	6.57039e-34
mesenchyme	VSTM4	13.4929	3.0135	6.79658e-34	4.28152e-33
mesenchyme	TNS2	13.4826	2.12553	5.36863e-34	3.38605e-33
mesenchyme	ATG101	13.4593	1.01405	2.17067e-34	1.3768e-33
mesenchyme	SLC25A36	13.4401	1.69743	5.24019e-34	3.3077e-33
mesenchyme	LPAR1	13.4248	5.05123	2.35134e-33	1.45843e-32
mesenchyme	ITGBL1	13.419	6.85576	2.75465e-33	1.70655e-32
mesenchyme	DOCK11	13.4176	3.56484	1.98546e-33	1.23344e-32
mesenchyme	CCDC71L	13.3998	1.60493	7.69992e-34	4.84281e-33
mesenchyme	STARD4-AS1	13.3969	3.49034	2.46315e-33	1.52657e-32
mesenchyme	CLEC2B	13.3808	5.06848	3.55962e-33	2.19946e-32
mesenchyme	PAPPA	13.3786	4.38075	3.5254e-33	2.17976e-32
mesenchyme	ANKRD11	13.3556	0.83115	3.27289e-34	2.0709e-33
mesenchyme	SH3GL1	13.3456	1.44144	1.14011e-33	7.13919e-33
mesenchyme	PBX3	13.3451	2.12367	1.89701e-33	1.17942e-32
mesenchyme	NXPE3	13.3444	3.50717	3.81228e-33	2.35158e-32
mesenchyme	UGGT2	13.3427	1.59582	1.33936e-33	8.36352e-33
mesenchyme	RBM3	13.3319	0.633847	2.32487e-34	1.47401e-33
mesenchyme	DPYSL2	13.3311	1.13372	7.8694e-34	4.94743e-33
mesenchyme	WNT5B	13.3246	2.48949	2.87178e-33	1.77772e-32
mesenchyme	MAPKAPK2	13.3219	1.29561	1.12067e-33	7.02029e-33
mesenchyme	FLNC	13.3163	5.18672	6.27181e-33	3.84908e-32
mesenchyme	RAN	13.2974	0.557243	1.76891e-34	1.12379e-33
mesenchyme	PPP5C	13.2968	1.39804	1.29243e-33	8.0737e-33
mesenchyme	PEAK1	13.2821	2.14351	3.80527e-33	2.34818e-32
mesenchyme	XPOT	13.2623	1.52586	2.78946e-33	1.72744e-32
mesenchyme	ABL2	13.2507	1.75591	3.56008e-33	2.19946e-32
mesenchyme	ANKRD50	13.245	1.83529	4.02037e-33	2.47799e-32
mesenchyme	TIMP1	13.2359	0.983253	6.43972e-34	4.05834e-33
mesenchyme	TUBA1C	13.2068	0.921626	1.17791e-33	7.373e-33
mesenchyme	SLC24A3	13.1991	8.00453	1.92954e-32	1.17227e-31
mesenchyme	SLC20A2	13.1959	1.78884	7.03475e-33	4.31562e-32
mesenchyme	CSGALNACT2	13.1866	1.84794	5.41637e-33	3.32929e-32
mesenchyme	KIF13A	13.1711	1.45821	5.65508e-33	3.4733e-32
mesenchyme	FHOD1	13.1613	2.77181	1.61577e-32	9.83545e-32
mesenchyme	ZCCHC24	13.1502	2.61221	1.68736e-32	1.02673e-31
mesenchyme	SOGA1	13.1446	2.91684	1.92285e-32	1.16866e-31
mesenchyme	NRP2	13.1166	2.06531	1.41314e-32	8.61202e-32
mesenchyme	PLCB1	13.115	2.56258	1.99721e-32	1.21245e-31
mesenchyme	ARL1	13.1092	0.727142	1.80148e-33	1.1218e-32
mesenchyme	PRSS23	13.1036	1.03866	1.48516e-33	9.27032e-33
mesenchyme	COL15A1	13.1008	7.71991	4.60594e-32	2.76515e-31
mesenchyme	MSANTD3	13.1007	1.07503	4.83478e-33	2.97529e-32
mesenchyme	DNAJC13	13.0978	1.38629	1.02449e-32	6.25319e-32
mesenchyme	MED10	13.0853	0.927896	5.86768e-33	3.60246e-32
mesenchyme	CTSA	13.0711	0.828149	3.86207e-33	2.38136e-32
mesenchyme	PLOD3	13.0675	1.25293	1.19261e-32	7.27373e-32
mesenchyme	KIAA0040	13.057	2.73019	4.5544e-32	2.73525e-31
mesenchyme	CACNA1C	13.0527	9.05029	7.03638e-32	4.20177e-31
mesenchyme	UBE2S	13.0386	1.36677	1.85973e-32	1.13073e-31
mesenchyme	RRAS	13.0368	0.860346	4.04201e-33	2.49035e-32
mesenchyme	LEF1	13.0345	4.16421	6.63611e-32	3.96425e-31
mesenchyme	HOXB4	13.0097	9.8502	1.02889e-31	6.12304e-31
mesenchyme	POLR3D	12.9987	1.70571	3.12536e-32	1.88639e-31
mesenchyme	RGS16	12.9922	5.90102	1.15991e-31	6.89498e-31
mesenchyme	LINC00882	12.9839	7.78948	1.27593e-31	7.57601e-31
mesenchyme	HTRA2	12.9819	1.53896	3.35994e-32	2.02485e-31
mesenchyme	SLC17A5	12.9599	1.53209	4.54009e-32	2.7277e-31
mesenchyme	RILPL1	12.954	2.67272	9.39023e-32	5.59886e-31
mesenchyme	BNC2	12.9413	7.20487	1.83742e-31	1.08485e-30
mesenchyme	DCLK2	12.9378	7.31221	1.87974e-31	1.10941e-30
mesenchyme	HS2ST1	12.9369	1.26721	3.79048e-32	2.2817e-31
mesenchyme	HERPUD1	12.9327	1.06738	2.64097e-32	1.59586e-31
mesenchyme	MEG3	12.9169	1.99421	5.76803e-32	3.45196e-31
mesenchyme	KIFC3	12.9126	1.81454	7.4814e-32	4.46582e-31
mesenchyme	YRDC	12.9069	1.38406	6.1921e-32	3.70324e-31
mesenchyme	DOK6	12.9013	6.65743	2.57226e-31	1.51019e-30
mesenchyme	PCMT1	12.9012	0.793619	2.48068e-32	1.50131e-31
mesenchyme	IL4R	12.8861	1.70436	1.00589e-31	5.98848e-31
mesenchyme	SGCE	12.8618	1.90392	1.30291e-31	7.73039e-31
mesenchyme	SGTB	12.8422	2.86058	2.5521e-31	1.49892e-30
mesenchyme	GLS	12.8118	1.14854	6.26022e-32	3.74255e-31
mesenchyme	EDEM1	12.792	1.54834	2.00893e-31	1.18432e-30
mesenchyme	KCNG1	12.7907	9.8008	6.96967e-31	4.04359e-30
mesenchyme	DACT3	12.7894	7.37425	6.90325e-31	4.00653e-30
mesenchyme	MRFAP1	12.7801	0.543289	3.53203e-32	2.12775e-31
mesenchyme	BICD2	12.7722	1.63524	2.4577e-31	1.44401e-30
mesenchyme	TPST2	12.7643	1.21321	1.42831e-31	8.46477e-31
mesenchyme	ARFRP1	12.7597	1.38853	2.05139e-31	1.20891e-30
mesenchyme	PPP1R15A	12.7348	1.1069	1.32385e-31	7.85164e-31
mesenchyme	TSHZ3	12.7228	5.46155	1.15363e-30	6.64397e-30
mesenchyme	SPON2	12.7219	1.66418	5.2529e-31	3.06114e-30
mesenchyme	COL27A1	12.6957	1.64003	5.07003e-31	2.95786e-30
mesenchyme	SPRY2	12.669	1.9253	8.57243e-31	4.95334e-30
mesenchyme	PLCG1	12.6681	2.47028	1.14443e-30	6.59336e-30
mesenchyme	SEC14L1	12.6675	1.29378	4.20941e-31	2.45852e-30
mesenchyme	SHMT2	12.6418	0.895669	1.5543e-31	9.20109e-31
mesenchyme	PSMA7	12.6225	0.453256	3.25526e-31	1.90478e-30
mesenchyme	SGIP1	12.6178	3.86128	2.49324e-30	1.42441e-29
mesenchyme	RASA3	12.6173	3.7539	2.44406e-30	1.39733e-29
mesenchyme	KCTD10	12.6007	1.70353	1.26799e-30	7.29457e-30
mesenchyme	SNHG18	12.5973	1.90062	1.1711e-30	6.74208e-30
mesenchyme	CCND3	12.5847	1.26534	6.37217e-31	3.70104e-30
mesenchyme	ARPC5	12.5819	0.603822	2.24526e-31	1.32117e-30
mesenchyme	MAFG	12.5752	1.22503	1.13641e-30	6.5496e-30
mesenchyme	EIF1	12.5673	0.317993	2.62534e-31	1.54078e-30
mesenchyme	JAK1	12.5568	0.601133	3.24549e-31	1.89977e-30
mesenchyme	PWWP2A	12.5544	1.39314	1.45859e-30	8.38183e-30
mesenchyme	HOMER3	12.549	1.33174	8.38984e-31	4.8532e-30
mesenchyme	MAP2K2	12.5456	0.713203	6.4653e-31	3.75374e-30
mesenchyme	FHL1	12.5309	6.43656	6.34947e-30	3.58707e-29
mesenchyme	BRI3	12.5293	0.616908	8.44775e-31	4.8831e-30
mesenchyme	RHOBTB3	12.5249	0.947161	9.6744e-31	5.58393e-30
mesenchyme	NAA10	12.5235	0.681861	5.67236e-31	3.30068e-30
mesenchyme	NCKAP1	12.5235	0.894355	8.34344e-31	4.82813e-30
mesenchyme	SSPN	12.5146	3.62238	6.10454e-30	3.45119e-29
mesenchyme	CAPN2	12.5126	0.653235	4.02744e-31	2.35311e-30
mesenchyme	PRNP	12.509	1.08318	1.43666e-30	8.25882e-30
mesenchyme	CNIH3	12.4991	4.66192	7.93272e-30	4.46706e-29
mesenchyme	CTSL	12.4843	1.09659	2.63759e-30	1.50469e-29
mesenchyme	RPN2	12.4809	0.619267	8.30223e-31	4.80605e-30
mesenchyme	ESYT2	12.4796	1.4354	2.8911e-30	1.64871e-29
mesenchyme	RAC1	12.4773	0.444735	1.79184e-31	1.05833e-30
mesenchyme	ATP10A	12.4768	2.57005	5.32518e-30	3.01818e-29
mesenchyme	ZFP36L1	12.4649	0.878941	1.88178e-30	1.07861e-29
mesenchyme	PPP1R7	12.4643	0.845659	1.93548e-30	1.10858e-29
mesenchyme	ANGPT2	12.4636	4.73051	1.1068e-29	6.20813e-29
mesenchyme	CTDNEP1	12.4615	0.883225	1.51626e-30	8.71003e-30
mesenchyme	COPS7A	12.4551	1.23646	2.55596e-30	1.45865e-29
mesenchyme	RAB28	12.4525	1.92839	5.10641e-30	2.89732e-29
mesenchyme	LAMTOR1	12.4428	0.558761	1.01487e-30	5.85339e-30
mesenchyme	PDLIM5	12.4144	0.975733	3.30038e-30	1.87938e-29
mesenchyme	KANK2	12.408	1.60692	6.6823e-30	3.76968e-29
mesenchyme	HAND2	12.4065	9.22067	1.93113e-29	1.07741e-28
mesenchyme	AGPAT5	12.3829	1.36002	6.97726e-30	3.93325e-29
mesenchyme	GNAI2	12.3814	0.719731	1.83304e-30	1.05144e-29
mesenchyme	DLC1	12.3737	1.81332	9.54775e-30	5.36306e-29
mesenchyme	RIC8A	12.371	1.16644	5.38146e-30	3.04898e-29
mesenchyme	RAB32	12.3641	0.803039	2.55267e-30	1.4573e-29
mesenchyme	USP7	12.3425	1.06306	6.36147e-30	3.59256e-29
mesenchyme	PGP	12.3366	0.899671	4.24891e-30	2.4134e-29
mesenchyme	AKAP13	12.3233	0.913644	6.43769e-30	3.63299e-29
mesenchyme	HSPB7	12.3025	10.5861	4.75173e-29	2.62406e-28
mesenchyme	TCF21	12.2927	9.43143	5.15589e-29	2.84225e-28
mesenchyme	PFKFB4	12.2837	4.42371	5.01426e-29	2.76612e-28
mesenchyme	CHPF	12.2836	0.98247	1.02737e-29	5.76875e-29
mesenchyme	CCDC68	12.2818	1.45759	2.05757e-29	1.14674e-28
mesenchyme	UBE2D3	12.2661	0.543737	5.64507e-30	3.19372e-29
mesenchyme	EHD3	12.2661	8.41278	6.44735e-29	3.54796e-28
mesenchyme	NCOR2	12.2578	1.17302	1.70542e-29	9.54196e-29
mesenchyme	EIF3B	12.2535	0.82842	7.92004e-30	4.46152e-29
mesenchyme	RPS6KA2	12.2355	2.26368	4.61103e-29	2.54815e-28
mesenchyme	GUK1	12.2347	0.533781	6.15795e-30	3.48013e-29
mesenchyme	BEND6	12.227	3.62896	6.87191e-29	3.77631e-28
mesenchyme	KLHDC8B	12.2248	2.46526	5.62161e-29	3.09681e-28
mesenchyme	PSMD2	12.1785	0.742792	9.38235e-30	5.27204e-29
mesenchyme	RNF187	12.1703	1.0317	2.96977e-29	1.64986e-28
mesenchyme	ZBTB46	12.1654	4.56437	1.38391e-28	7.56e-28
mesenchyme	MFSD12	12.1456	1.26945	4.76079e-29	2.62813e-28
mesenchyme	LRP10	12.1413	0.674271	1.81484e-29	1.01434e-28
mesenchyme	MGAT1	12.1364	1.28575	5.68433e-29	3.13027e-28
mesenchyme	ACOT9	12.1316	1.05704	3.60234e-29	1.99564e-28
mesenchyme	GOLGA3	12.131	0.987709	4.04132e-29	2.23725e-28
mesenchyme	RAI14	12.1251	1.16076	3.33426e-29	1.84908e-28
mesenchyme	MAPRE1	12.1186	1.09468	4.30442e-29	2.37955e-28
mesenchyme	GLIPR2	12.1065	3.2362	1.90856e-28	1.03791e-27
mesenchyme	AVEN	12.1025	1.24404	7.41329e-29	4.07096e-28
mesenchyme	LINC00702	12.1024	5.88787	2.52257e-28	1.3671e-27
mesenchyme	DLGAP4	12.1016	1.10155	5.15186e-29	2.84103e-28
mesenchyme	SH3RF3	12.0945	8.56338	2.79865e-28	1.51515e-27
mesenchyme	LSM1	12.0899	0.780543	4.09421e-29	2.26573e-28
mesenchyme	IAH1	12.0846	0.811061	4.92652e-29	2.71867e-28
mesenchyme	STUB1	12.083	0.584655	2.76583e-29	1.53765e-28
mesenchyme	SCML1	12.0746	1.62805	1.18516e-28	6.48102e-28
mesenchyme	ACP5	12.0622	3.1336	3.08157e-28	1.66545e-27
mesenchyme	ATAD3A	12.0599	1.66315	1.48751e-28	8.12031e-28
mesenchyme	POFUT2	12.0588	1.93135	1.70297e-28	9.2804e-28
mesenchyme	FARP1	12.0538	0.823117	7.11543e-29	3.90876e-28
mesenchyme	SDC2	12.0529	0.908818	2.89909e-29	1.61117e-28
mesenchyme	LRP1	12.0507	0.744079	4.2293e-29	2.33885e-28
mesenchyme	PSMD8	12.0478	0.639341	8.61153e-29	4.72072e-28
mesenchyme	ANKH	12.0463	1.31647	1.58077e-28	8.62046e-28
mesenchyme	YWHAB	12.039	0.446057	1.08027e-29	6.06362e-29
mesenchyme	ITM2C	12.0205	0.98691	9.22101e-29	5.0513e-28
mesenchyme	CCDC112	12.0071	1.5152	1.85858e-28	1.01109e-27
mesenchyme	PLEKHB2	12.0005	1.02568	1.13943e-28	6.23315e-28
mesenchyme	GLT8D2	11.9969	6.79906	6.32419e-28	3.39226e-27
mesenchyme	UBE2E2	11.9953	1.13744	1.42085e-28	7.75913e-28
mesenchyme	TBC1D20	11.9838	1.26666	1.8345e-28	9.98329e-28
mesenchyme	HDAC7	11.9719	1.39091	2.25716e-28	1.22622e-27
mesenchyme	FZD1	11.9695	3.7893	6.7768e-28	3.63132e-27
mesenchyme	HS3ST3A1	11.9495	4.77538	8.73062e-28	4.66237e-27
mesenchyme	SLC30A5	11.9472	1.178	2.6743e-28	1.44832e-27
mesenchyme	RILPL2	11.9324	1.55897	4.21931e-28	2.27565e-27
mesenchyme	PLTP	11.9289	6.0815	1.1146e-27	5.93611e-27
mesenchyme	OLFML2A	11.9283	4.85422	1.07074e-27	5.70445e-27
mesenchyme	CYP26B1	11.9187	7.91247	1.24709e-27	6.63273e-27
mesenchyme	TEAD3	11.9169	2.07999	6.79526e-28	3.63997e-27
mesenchyme	PDAP1	11.9058	0.673458	1.80894e-28	9.84763e-28
mesenchyme	POMP	11.9051	0.565502	2.60661e-28	1.41215e-27
mesenchyme	PLOD2	11.8952	1.07042	2.48917e-28	1.34946e-27
mesenchyme	TAOK1	11.89	1.01501	3.40386e-28	1.839e-27
mesenchyme	FRMD6	11.8708	1.1301	1.3409e-28	7.32763e-28
mesenchyme	MYO9A	11.8644	1.90129	8.5516e-28	4.56987e-27
mesenchyme	IER3IP1	11.8382	0.892278	5.07122e-28	2.72856e-27
mesenchyme	HIP1	11.8297	2.0749	1.32182e-27	7.02301e-27
mesenchyme	HEPH	11.8168	3.81836	2.47232e-27	1.30476e-26
mesenchyme	VGLL4	11.7949	1.00805	1.06731e-27	5.68809e-27
mesenchyme	MANF	11.7912	0.764362	6.53016e-28	3.50155e-27
mesenchyme	FNDC3B	11.7743	0.77322	5.67477e-28	3.04704e-27
mesenchyme	PPP1R12C	11.7546	1.66665	2.09364e-27	1.10751e-26
mesenchyme	PWP1	11.7508	0.970491	1.167e-27	6.21097e-27
mesenchyme	C1orf54	11.7498	4.00042	4.59169e-27	2.41271e-26
mesenchyme	PRKRA	11.7205	0.996879	1.5364e-27	8.14935e-27
mesenchyme	MAP4K5	11.7187	1.00548	1.43331e-27	7.60769e-27
mesenchyme	RIT1	11.7179	1.29506	2.30835e-27	1.21986e-26
mesenchyme	RASSF8-AS1	11.7121	1.82603	3.08731e-27	1.62713e-26
mesenchyme	TMEM26	11.7096	9.81593	7.34039e-27	3.83012e-26
mesenchyme	SMARCA1	11.6692	1.18455	2.53962e-27	1.33982e-26
mesenchyme	CGGBP1	11.6669	0.854372	1.9237e-27	1.01899e-26
mesenchyme	CDC42BPA	11.6643	1.01816	2.78279e-27	1.46762e-26
mesenchyme	STC2	11.6628	4.04281	9.98633e-27	5.18834e-26
mesenchyme	HSD17B1	11.662	3.24276	8.83777e-27	4.59921e-26
mesenchyme	KCNS3	11.6573	2.8045	8.04381e-27	4.19158e-26
mesenchyme	TMTC3	11.6567	1.39106	3.94133e-27	2.07167e-26
mesenchyme	SLC7A11	11.6471	2.4346	8.58801e-27	4.4722e-26
mesenchyme	EMC7	11.6445	0.596601	1.33157e-27	7.07243e-27
mesenchyme	RRAGA	11.6115	0.799624	3.53771e-27	1.86201e-26
mesenchyme	BBS7	11.6115	1.72166	7.86548e-27	4.10138e-26
mesenchyme	CRNDE	11.6065	1.42173	6.26855e-27	3.28503e-26
mesenchyme	MBD3	11.6011	1.25571	5.60522e-27	2.94232e-26
mesenchyme	AP3S1	11.594	0.737138	3.25851e-27	1.71678e-26
mesenchyme	NAV3	11.5899	4.12221	1.70006e-26	8.78318e-26
mesenchyme	PGM2	11.5733	1.50761	8.97753e-27	4.6704e-26
mesenchyme	ZFHX4	11.5621	2.24626	1.44127e-26	7.46088e-26
mesenchyme	ROCK2	11.5619	0.903676	7.04418e-27	3.68168e-26
mesenchyme	TMF1	11.5617	0.893426	6.14417e-27	3.22092e-26
mesenchyme	TP53RK	11.5566	1.10644	7.3356e-27	3.82889e-26
mesenchyme	ARHGAP10	11.5547	1.62823	1.25478e-26	6.51053e-26
mesenchyme	DUSP5	11.5445	2.86942	2.10539e-26	1.08558e-25
mesenchyme	HLX	11.5246	5.53722	3.31453e-26	1.70123e-25
mesenchyme	UBE2A	11.5236	0.770794	5.78394e-27	3.03411e-26
mesenchyme	PABPC4	11.5133	0.730289	6.36096e-27	3.33012e-26
mesenchyme	KXD1	11.5079	0.906186	9.1363e-27	4.75142e-26
mesenchyme	TAF13	11.5032	1.07299	1.11229e-26	5.77691e-26
mesenchyme	ITPRIP	11.4969	4.04476	3.82761e-26	1.96201e-25
mesenchyme	ORMDL1	11.4682	0.776561	1.23516e-26	6.41082e-26
mesenchyme	SVIL	11.468	1.02962	1.37525e-26	7.12382e-26
mesenchyme	CREB3L2	11.4454	1.23995	2.49357e-26	1.28321e-25
mesenchyme	PDLIM4	11.4369	1.36462	1.32775e-26	6.88229e-26
mesenchyme	KPNA4	11.4325	0.803906	1.33899e-26	6.93828e-26
mesenchyme	AASS	11.4283	2.81193	5.34933e-26	2.72602e-25
mesenchyme	GSTO1	11.4271	0.584048	1.2796e-26	6.63712e-26
mesenchyme	CAND1	11.3934	0.93561	2.53688e-26	1.30465e-25
mesenchyme	BDNF	11.3915	2.79705	7.21443e-26	3.6646e-25
mesenchyme	ENDOD1	11.3873	1.34673	3.98211e-26	2.03788e-25
mesenchyme	DR1	11.3785	0.866885	2.89229e-26	1.48645e-25
mesenchyme	AP3M2	11.3733	1.76014	5.70351e-26	2.90463e-25
mesenchyme	FLYWCH2	11.372	1.2219	3.8723e-26	1.98362e-25
mesenchyme	TCEAL3	11.3544	1.31548	4.86265e-26	2.48123e-25
mesenchyme	PLBD2	11.3449	1.58248	7.84689e-26	3.98199e-25
mesenchyme	SLC25A46	11.343	1.1302	5.14774e-26	2.625e-25
mesenchyme	PKD1	11.3426	2.09684	9.20286e-26	4.66256e-25
mesenchyme	PITHD1	11.3399	0.887188	3.62806e-26	1.86033e-25
mesenchyme	HSP90B1	11.3315	0.500634	3.47699e-26	1.78345e-25
mesenchyme	MAFB	11.3237	3.07096	1.527e-25	7.69428e-25
mesenchyme	ZNF618	11.3199	1.50741	7.7974e-26	3.95816e-25
mesenchyme	ARMCX3	11.3091	0.826185	5.25645e-26	2.67956e-25
mesenchyme	NDUFA4L2	11.3023	4.22773	1.94169e-25	9.76812e-25
mesenchyme	NSMF	11.2982	1.71961	1.30154e-25	6.57297e-25
mesenchyme	VAMP2	11.2928	0.941588	6.7473e-26	3.42953e-25
mesenchyme	INPP5A	11.2925	1.95289	1.32445e-25	6.68436e-25
mesenchyme	CCDC85B	11.2897	1.31875	1.03287e-25	5.22621e-25
mesenchyme	TMEM230	11.2773	0.599642	4.12962e-26	2.11131e-25
mesenchyme	LZTS2	11.2605	1.77729	1.55054e-25	7.81036e-25
mesenchyme	EPHA3	11.2564	9.95301	3.22644e-25	1.61435e-24
mesenchyme	PGAM1	11.2496	0.703122	7.49387e-26	3.80531e-25
mesenchyme	COL13A1	11.2457	6.10169	3.39306e-25	1.69718e-24
mesenchyme	ANXA11	11.2315	0.648849	5.11419e-26	2.60873e-25
mesenchyme	AP1S2	11.2114	1.55678	2.31858e-25	1.16418e-24
mesenchyme	PDGFRA	11.2092	3.01935	3.6881e-25	1.84124e-24
mesenchyme	ACTR10	11.2047	0.919564	1.30222e-25	6.57427e-25
mesenchyme	NUCB2	11.2035	0.707617	8.74763e-26	4.43335e-25
mesenchyme	EEF2	11.1699	0.401374	9.90086e-26	5.01135e-25
mesenchyme	PRRC1	11.1678	0.982965	2.03202e-25	1.0216e-24
mesenchyme	NFATC4	11.154	4.11981	6.66839e-25	3.29871e-24
mesenchyme	ARHGEF2	11.1482	2.03713	4.69769e-25	2.33932e-24
mesenchyme	STARD13	11.1349	2.21564	5.43461e-25	2.69773e-24
mesenchyme	ADAMTS4	11.1324	8.63427	8.9638e-25	4.4189e-24
mesenchyme	TUBB2A	11.1323	1.30863	3.60032e-25	1.79856e-24
mesenchyme	ATP6AP1	11.1311	0.755473	1.89234e-25	9.52291e-25
mesenchyme	TRIB2	11.1266	2.21913	5.85443e-25	2.90429e-24
mesenchyme	SPDL1	11.1147	1.79288	5.20508e-25	2.58625e-24
mesenchyme	HOOK3	11.0969	0.758521	2.46791e-25	1.23797e-24
mesenchyme	CERK	11.0762	1.58973	7.11353e-25	3.5167e-24
mesenchyme	DIAPH2	11.0747	1.07118	4.89415e-25	2.43561e-24
mesenchyme	L3HYPDH	11.0683	1.76064	8.0031e-25	3.95398e-24
mesenchyme	ARCN1	11.0636	0.697288	3.51068e-25	1.75545e-24
mesenchyme	STK19	11.058	1.10366	5.59593e-25	2.77693e-24
mesenchyme	KHDRBS3	11.0524	1.73039	9.21472e-25	4.53975e-24
mesenchyme	DACT1	11.0455	5.6151	1.76125e-24	8.62292e-24
mesenchyme	PCYT1A	11.0422	1.05419	6.03772e-25	2.99144e-24
mesenchyme	HEY2	11.0352	4.98052	1.8875e-24	9.23817e-24
mesenchyme	INPPL1	11.0296	1.34509	8.42196e-25	4.157e-24
mesenchyme	PRR5	11.0295	2.19588	1.48683e-24	7.29533e-24

## Sheet: S4_Top1000_markers_Chol_Tissue
Supplementary Dataset 3_S4 - Top1000 Marker gene list of Cholangiocytes in human Tissue related to Fig. 4 and Extended Data Fig. 8
group	names	scores	logfoldchanges	pvals	pvals_adj
cholangiocyte	ANXA4	171.393	6.08081	0	0
cholangiocyte	DEFB1	138.257	5.4019	0	0
cholangiocyte	TM4SF4	126.239	4.69002	0	0
cholangiocyte	KRT7	116.652	7.41668	0	0
cholangiocyte	FXYD2	94.886	7.2647	0	0
cholangiocyte	KRT8	86.1997	3.94801	0	0
cholangiocyte	CLDN10	83.8263	6.98987	0	0
cholangiocyte	TACSTD2	79.3382	7.16278	0	0
cholangiocyte	SH3YL1	72.7859	5.68911	0	0
cholangiocyte	KRT18	72.6803	3.32283	0	0
cholangiocyte	LGALS4	72.0969	4.78558	0	0
cholangiocyte	EPCAM	70.3866	7.04127	0	0
cholangiocyte	ATP1A1	67.7711	4.02571	0	0
cholangiocyte	TNFRSF12A	66.6827	4.23953	0	0
cholangiocyte	ELF3	66.3156	4.88564	0	0
cholangiocyte	CLDN3	62.8974	4.86152	0	0
cholangiocyte	SPINT2	59.1168	5.09554	0	0
cholangiocyte	BICC1	58.776	5.66827	0	0
cholangiocyte	FGGY	58.0901	3.92551	0	0
cholangiocyte	S100A10	57.8234	3.19009	0	0
cholangiocyte	AQP1	57.455	5.46821	0	0
cholangiocyte	PLPP2	57.0975	7.07301	0	0
cholangiocyte	SFRP5	57.0263	7.2882	0	0
cholangiocyte	CLDN7	56.5794	5.41732	0	0
cholangiocyte	CLDN4	56.2325	6.64055	0	0
cholangiocyte	SLPI	54.5438	3.51498	0	0
cholangiocyte	C12orf75	54.0446	3.97292	0	0
cholangiocyte	CA2	54.0086	3.5219	0	0
cholangiocyte	CHST4	52.8972	7.04771	0	0
cholangiocyte	SPP1	52.6754	6.09293	0	0
cholangiocyte	S100A14	52.1877	5.87632	0	0
cholangiocyte	KLF6	52.1476	2.70674	0	0
cholangiocyte	ATP1B1	52.0683	2.99567	0	0
cholangiocyte	SLC12A2	51.2	5.13471	0	0
cholangiocyte	TMSB10	51.1259	2.35377	0	0
cholangiocyte	CLU	50.9274	2.15589	0	0
cholangiocyte	PERP	50.8831	2.96263	0	0
cholangiocyte	KRT19	50.748	5.63828	0	0
cholangiocyte	DUSP1	50.7041	2.60386	0	0
cholangiocyte	JUN	49.5707	2.35197	0	0
cholangiocyte	SOX4	49.2852	3.24054	0	0
cholangiocyte	ACTG1	48.2258	1.87034	0	0
cholangiocyte	GSTP1	48.0275	2.30161	0	0
cholangiocyte	DCDC2	47.92	6.82405	0	0
cholangiocyte	VAMP8	47.8026	2.67748	0	0
cholangiocyte	CXCL6	47.5824	6.43393	0	0
cholangiocyte	FGFR2	47.2605	5.13773	0	0
cholangiocyte	TESC	46.3944	3.61919	0	0
cholangiocyte	HOMER2	45.3028	3.71388	0	0
cholangiocyte	ANXA2	44.9946	2.44374	0	0
cholangiocyte	CTSH	44.3237	3.17223	0	0
cholangiocyte	CLDN1	43.9132	2.80368	0	0
cholangiocyte	DMKN	43.5564	5.33309	6.74853e-301	8.83552e-299
cholangiocyte	AKAP7	43.3976	4.51044	9.53409e-302	1.25874e-299
cholangiocyte	EEF1A1	43.0984	1.03913	0	0
cholangiocyte	RPL3	42.7593	1.00452	0	0
cholangiocyte	FOSB	42.7386	2.38311	0	0
cholangiocyte	CD59	42.5949	2.00943	0	0
cholangiocyte	HMGN1	41.9954	2.19048	0	0
cholangiocyte	CXADR	40.9616	2.94733	6.30497e-286	7.12643e-284
cholangiocyte	MCL1	40.923	2.2704	5.30548e-299	6.83233e-297
cholangiocyte	PPDPF	40.802	1.83376	0	0
cholangiocyte	SPINT1	40.792	6.24253	7.84767e-271	7.65806e-269
cholangiocyte	TSTD1	40.644	2.32606	4.05226e-293	4.89731e-291
cholangiocyte	ANPEP	40.4664	3.15613	8.3609e-277	8.87555e-275
cholangiocyte	SERPINA5	40.2457	2.45367	6.15709e-286	7.00972e-284
cholangiocyte	CYBA	39.7584	2.4974	3.908e-289	4.54804e-287
cholangiocyte	WWTR1	39.7124	3.36906	7.60936e-271	7.47192e-269
cholangiocyte	BTG1	39.6325	1.84783	3.84493e-294	4.79426e-292
cholangiocyte	CDC42EP1	39.5422	2.89945	5.39363e-273	5.50256e-271
cholangiocyte	HNRNPA1	38.5143	1.60522	2.74183e-287	3.16742e-285
cholangiocyte	SOX9	38.4028	5.26252	9.58484e-249	7.80246e-247
cholangiocyte	TM4SF1	38.1733	2.57752	9.25361e-270	8.97429e-268
cholangiocyte	MYL12A	37.8163	1.7463	3.26203e-272	3.28524e-270
cholangiocyte	RPL15	37.6531	0.989808	1.68661e-275	1.76656e-273
cholangiocyte	APP	37.5274	2.00396	8.46512e-263	7.73229e-261
cholangiocyte	VMP1	37.4976	2.24523	3.06961e-257	2.63534e-255
cholangiocyte	FAM3B	37.2606	6.39975	2.97397e-235	2.20396e-233
cholangiocyte	SPATS2L	37.249	2.14194	1.56999e-254	1.30509e-252
cholangiocyte	NEDD9	37.2347	3.58992	5.48288e-242	4.30708e-240
cholangiocyte	KIF12	37.034	5.0603	6.71016e-234	4.88071e-232
cholangiocyte	CPM	36.9366	2.9675	1.46407e-243	1.16172e-241
cholangiocyte	GC	36.7947	2.17682	1.18812e-264	1.09947e-262
cholangiocyte	RPL11	36.6045	0.756921	2.91341e-261	2.60072e-259
cholangiocyte	MMP7	36.5274	6.23494	6.98357e-228	4.77038e-226
cholangiocyte	RPSA	36.5224	1.35309	3.0342e-258	2.66315e-256
cholangiocyte	ABCC3	36.4736	3.09189	4.39214e-234	3.22453e-232
cholangiocyte	GLIS3	36.3611	3.88665	2.3615e-231	1.68644e-229
cholangiocyte	RPL34	36.2057	0.737115	3.68901e-258	3.21989e-256
cholangiocyte	PLSCR1	35.9217	2.77604	2.80616e-232	2.01313e-230
cholangiocyte	AKR1C1	35.7731	2.15938	1.41253e-239	1.06694e-237
cholangiocyte	LAD1	35.4279	5.50285	1.66628e-217	1.08177e-215
cholangiocyte	ANXA3	35.3787	5.71254	2.79634e-217	1.80055e-215
cholangiocyte	RPL14	35.2046	0.925949	1.55659e-244	1.2414e-242
cholangiocyte	VSIG2	35.1716	5.18819	1.51335e-216	9.70456e-215
cholangiocyte	NCOA7	35.1513	3.32973	3.51866e-220	2.3034e-218
cholangiocyte	RAB3IP	34.7573	4.09995	8.24568e-214	5.04077e-212
cholangiocyte	RPS6	34.7286	0.856961	1.39751e-239	1.06069e-237
cholangiocyte	PKHD1	34.7187	6.44435	7.34692e-210	4.42251e-208
cholangiocyte	EGR1	34.3234	1.96472	4.71654e-229	3.26439e-227
cholangiocyte	LAMP2	33.8118	2.06212	1.80962e-214	1.11494e-212
cholangiocyte	NFKBIA	33.3028	1.79117	1.08957e-214	6.76612e-213
cholangiocyte	PLLP	33.2822	5.09247	2.32944e-197	1.27076e-195
cholangiocyte	RHOB	33.268	1.55741	5.11329e-215	3.20059e-213
cholangiocyte	EIF1	33.0436	0.908044	7.54331e-216	4.7981e-214
cholangiocyte	RAB25	32.91	6.75184	1.32121e-192	6.89617e-191
cholangiocyte	TSPO	32.8084	1.89445	1.13739e-207	6.74323e-206
cholangiocyte	PDLIM1	32.7172	1.83558	5.11039e-207	2.99587e-205
cholangiocyte	EHF	32.5981	6.65945	1.15563e-189	5.93336e-188
cholangiocyte	RASSF7	32.4706	3.74367	3.5105e-191	1.82025e-189
cholangiocyte	RAB11FIP1	32.4442	4.18954	1.06471e-190	5.50251e-189
cholangiocyte	S100A11	32.4346	1.8947	1.41586e-208	8.42599e-207
cholangiocyte	AGT	32.3314	1.73447	8.503e-206	4.91142e-204
cholangiocyte	BEX2	32.3251	5.54536	7.77546e-188	3.92798e-186
cholangiocyte	GNG5	32.2505	1.5659	2.89328e-202	1.64102e-200
cholangiocyte	VTN	32.1788	1.94287	1.05357e-208	6.2938e-207
cholangiocyte	ANXA13	32.1699	5.87461	6.7947e-186	3.36755e-184
cholangiocyte	HSP90AB1	32.0838	1.45779	9.80134e-204	5.5996e-202
cholangiocyte	RPS3A	32.0572	0.89213	6.20306e-207	3.60949e-205
cholangiocyte	SLC5A1	32.0027	6.81789	6.10757e-184	2.98e-182
cholangiocyte	PRSS8	31.9736	5.00407	1.12236e-184	5.51045e-183
cholangiocyte	CHST9	31.8661	4.9504	1.66469e-183	8.09721e-182
cholangiocyte	SCGN	31.8504	6.63038	1.95246e-182	9.43848e-181
cholangiocyte	TACC1	31.7742	1.99568	4.24583e-196	2.30021e-194
cholangiocyte	ARRDC2	31.7512	4.15452	3.49631e-184	1.71123e-182
cholangiocyte	TGIF1	31.6287	2.69886	1.35488e-187	6.82259e-186
cholangiocyte	IER2	31.555	1.74733	5.54852e-199	3.08031e-197
cholangiocyte	FOS	31.4951	1.67436	2.14221e-200	1.20632e-198
cholangiocyte	SLC17A4	31.4401	3.86774	1.64816e-180	7.87059e-179
cholangiocyte	KLF5	31.3673	4.67563	3.84571e-179	1.79821e-177
cholangiocyte	TSPAN8	31.3459	4.13355	1.04281e-179	4.94973e-178
cholangiocyte	MYL12B	31.2687	1.37333	4.5091e-194	2.40144e-192
cholangiocyte	PDZK1IP1	31.1966	5.53894	3.40584e-177	1.5738e-175
cholangiocyte	SERINC2	31.0446	2.75449	1.13464e-179	5.3694e-178
cholangiocyte	HHEX	30.9596	2.81239	1.431e-178	6.65161e-177
cholangiocyte	RPS27A	30.9492	0.684412	5.08995e-194	2.70163e-192
cholangiocyte	ARL4C	30.9003	4.63519	3.49256e-175	1.57677e-173
cholangiocyte	RPL5	30.8681	0.978359	1.23704e-192	6.4784e-191
cholangiocyte	MUC6	30.7797	5.42115	2.53436e-173	1.13764e-171
cholangiocyte	ERICH5	30.5874	5.0855	1.34353e-171	5.92929e-170
cholangiocyte	PPA1	30.5598	1.72761	6.24623e-182	3.01026e-180
cholangiocyte	ITGB8	30.4232	6.37798	2.54901e-169	1.09719e-167
cholangiocyte	RPL26	30.2116	0.721321	2.17267e-185	1.07342e-183
cholangiocyte	SERPINA4	30.2025	1.90362	2.92946e-177	1.35766e-175
cholangiocyte	HLA-A	29.9399	1.48119	2.33629e-181	1.11907e-179
cholangiocyte	KCNQ1OT1	29.9323	2.58726	6.58029e-172	2.92042e-170
cholangiocyte	RGS3	29.8421	2.76496	1.77895e-169	7.67833e-168
cholangiocyte	LINC01320	29.7306	5.0013	3.17307e-163	1.2915e-161
cholangiocyte	MYO10	29.7156	4.20594	6.1905e-165	2.5394e-163
cholangiocyte	MAGI1	29.6316	2.74285	7.74582e-167	3.24519e-165
cholangiocyte	SLC4A4	29.5241	3.30365	3.6508e-163	1.48211e-161
cholangiocyte	TM7SF3	29.5189	2.39735	8.85912e-167	3.70175e-165
cholangiocyte	PAWR	29.4772	2.11711	1.94606e-168	8.24112e-167
cholangiocyte	RPS3	29.3175	0.849334	2.42913e-175	1.09983e-173
cholangiocyte	CITED4	29.2488	3.4851	6.93635e-161	2.77295e-159
cholangiocyte	IL32	29.114	1.79701	5.34928e-169	2.28377e-167
cholangiocyte	MAFF	29.0953	2.29302	4.07239e-165	1.67491e-163
cholangiocyte	HSP90AA1	29.0737	1.26404	5.74752e-169	2.44714e-167
cholangiocyte	RNF19A	29.0601	2.40024	2.78648e-162	1.12252e-160
cholangiocyte	ANXA11	28.9862	1.8334	2.34408e-166	9.76867e-165
cholangiocyte	HLA-B	28.9715	1.35959	4.62852e-171	2.01996e-169
cholangiocyte	STXBP6	28.9522	4.89374	1.7826e-156	6.91517e-155
cholangiocyte	FAIM	28.8412	3.1726	1.27986e-158	5.05221e-157
cholangiocyte	MARCKSL1	28.6857	2.51579	2.58314e-160	1.03005e-158
cholangiocyte	RPL6	28.6203	0.844736	3.55498e-168	1.5014e-166
cholangiocyte	CXCL1	28.5703	4.14745	4.95558e-154	1.88061e-152
cholangiocyte	DSP	28.5689	2.44922	7.84697e-157	3.05158e-155
cholangiocyte	BAMBI	28.3268	2.82239	1.74944e-154	6.67122e-153
cholangiocyte	BEX1	28.3096	4.62233	3.84511e-151	1.42478e-149
cholangiocyte	CLDN9	28.3027	7.81437	1.18557e-149	4.33173e-148
cholangiocyte	PMEPA1	28.1262	3.14692	2.42758e-152	9.08087e-151
cholangiocyte	TMEM97	28.1022	2.33356	1.74072e-152	6.52706e-151
cholangiocyte	ATF3	28.0109	1.77957	2.30075e-157	8.9918e-156
cholangiocyte	ANXA5	27.9726	1.5838	2.09015e-158	8.23016e-157
cholangiocyte	LDLR	27.9689	2.13233	1.6668e-152	6.26486e-151
cholangiocyte	MEAF6	27.8862	1.85263	6.95247e-154	2.63206e-152
cholangiocyte	PDGFC	27.8569	3.17855	7.12767e-149	2.58621e-147
cholangiocyte	SDC4	27.7716	1.85286	1.62173e-152	6.11009e-151
cholangiocyte	SPAG16	27.76	2.56869	8.39486e-150	3.0744e-148
cholangiocyte	DSG2	27.6519	3.52575	7.38292e-146	2.60074e-144
cholangiocyte	EIF4A2	27.5819	1.32194	5.48566e-155	2.10208e-153
cholangiocyte	HSD17B2	27.3337	2.30713	2.53598e-145	8.87367e-144
cholangiocyte	ZC3H12A	27.3294	3.08144	2.15975e-144	7.49048e-143
cholangiocyte	DHRS7	27.2646	1.78767	5.40803e-148	1.94429e-146
cholangiocyte	BIRC3	27.2506	3.03652	2.19671e-143	7.55196e-142
cholangiocyte	RPS27	27.1957	0.646599	5.24194e-153	1.97972e-151
cholangiocyte	SET	27.163	1.58525	4.01977e-148	1.4485e-146
cholangiocyte	KRTCAP3	27.1159	3.62212	9.36943e-141	3.15887e-139
cholangiocyte	PRR15L	27.029	7.72944	1.80193e-138	5.96002e-137
cholangiocyte	RPL37	26.9884	0.668516	9.00236e-151	3.32009e-149
cholangiocyte	SNRPN	26.9718	1.75715	3.80947e-146	1.34799e-144
cholangiocyte	CDH1	26.9437	2.46776	2.71412e-141	9.20983e-140
cholangiocyte	OCLN	26.9303	2.85979	1.91672e-140	6.43452e-139
cholangiocyte	NEDD4L	26.7798	2.96162	1.27924e-138	4.24012e-137
cholangiocyte	NPM1	26.741	1.18719	1.18037e-146	4.19565e-145
cholangiocyte	RPL8	26.6936	0.748019	5.87555e-147	2.09797e-145
cholangiocyte	CAV2	26.6852	1.6141	8.95023e-145	3.111e-143
cholangiocyte	CHP1	26.6435	1.77829	4.32095e-141	1.45992e-139
cholangiocyte	RPL13	26.6341	0.564736	3.52973e-147	1.26611e-145
cholangiocyte	RPL21	26.518	0.623249	4.95723e-146	1.75018e-144
cholangiocyte	KIFC3	26.502	3.01181	1.11144e-136	3.63788e-135
cholangiocyte	HSD17B11	26.4744	1.62788	3.5214e-140	1.17462e-138
cholangiocyte	AKR1C3	26.4173	2.13086	1.61264e-137	5.31157e-136
cholangiocyte	GMNN	26.3509	3.41095	1.48939e-134	4.78522e-133
cholangiocyte	FGFR4	26.2193	3.15138	9.36298e-134	2.96576e-132
cholangiocyte	ZBTB20	26.216	1.71016	8.19018e-138	2.70328e-136
cholangiocyte	SYNGR1	26.1513	2.69995	1.1979e-134	3.85659e-133
cholangiocyte	PHGDH	26.0909	1.93602	2.20272e-135	7.12076e-134
cholangiocyte	IGF2BP2	26.0867	4.56301	3.4914e-131	1.08192e-129
cholangiocyte	FARP1	26.0142	2.12652	1.64106e-134	5.26179e-133
cholangiocyte	FGFR3	26.0089	3.55866	3.17329e-131	9.8724e-130
cholangiocyte	UGT2A3	25.9772	3.33702	1.00341e-130	3.07902e-129
cholangiocyte	ETV4	25.9457	6.23833	2.626e-129	7.98011e-128
cholangiocyte	SLC44A3	25.8953	4.48743	1.80487e-129	5.4954e-128
cholangiocyte	HOOK2	25.8281	2.52337	9.94291e-132	3.10563e-130
cholangiocyte	MMP15	25.7996	3.94677	5.94342e-129	1.79917e-127
cholangiocyte	TMSB4X	25.7513	1.10704	2.09485e-137	6.8854e-136
cholangiocyte	RPS24	25.5844	0.659577	2.27942e-136	7.42986e-135
cholangiocyte	CD47	25.5196	1.91652	6.81387e-131	2.09907e-129
cholangiocyte	RPS8	25.4993	0.667241	1.26679e-135	4.11208e-134
cholangiocyte	SERPINA1	25.4667	1.64853	7.14826e-135	2.30608e-133
cholangiocyte	ST14	25.4644	6.23044	3.59136e-125	1.04877e-123
cholangiocyte	BCL2L1	25.4434	2.19385	3.23662e-129	9.8167e-128
cholangiocyte	RPL24	25.3989	0.69056	8.1846e-134	2.59774e-132
cholangiocyte	RPL10A	25.3963	0.765431	1.89432e-134	6.04912e-133
cholangiocyte	ARL6IP1	25.3921	1.32747	1.77905e-131	5.54576e-130
cholangiocyte	RPL7	25.3893	0.710314	1.70096e-134	5.44273e-133
cholangiocyte	EEPD1	25.3774	3.76786	1.86899e-125	5.46809e-124
cholangiocyte	RAB4A	25.2288	1.80111	8.82765e-128	2.63672e-126
cholangiocyte	AKAP9	25.2147	1.60257	7.88153e-129	2.37671e-127
cholangiocyte	FAM171A1	25.2088	3.68269	4.34645e-124	1.25991e-122
cholangiocyte	ARF6	25.1865	1.74821	4.24531e-128	1.27286e-126
cholangiocyte	HNRNPA0	25.1641	1.43839	7.90778e-130	2.4171e-128
cholangiocyte	ONECUT1	25.1155	4.02877	7.95902e-123	2.29018e-121
cholangiocyte	BEX4	25.1074	2.05518	1.54446e-127	4.59565e-126
cholangiocyte	TOR1AIP2	25.1044	1.71702	7.44671e-127	2.2033e-125
cholangiocyte	BACE2	25.0511	3.26533	1.13397e-123	3.28099e-122
cholangiocyte	ODC1	25.0062	2.10225	1.59666e-125	4.68007e-124
cholangiocyte	TPM4	24.9128	1.5793	7.70008e-128	2.3043e-126
cholangiocyte	TUBB	24.898	1.22392	1.36601e-127	4.07238e-126
cholangiocyte	KCNJ16	24.8171	7.63738	1.37351e-119	3.77259e-118
cholangiocyte	RPL18A	24.8163	0.655722	6.71233e-129	2.02803e-127
cholangiocyte	DAB2	24.7729	3.10664	2.21612e-121	6.2174e-120
cholangiocyte	TES	24.7155	3.63284	3.68339e-120	1.02243e-118
cholangiocyte	BMP2	24.6758	3.86263	1.22934e-119	3.38251e-118
cholangiocyte	RPS12	24.6701	0.578805	4.13671e-127	1.22626e-125
cholangiocyte	PPP1R15A	24.6458	1.45753	3.55755e-126	1.04668e-124
cholangiocyte	CCL28	24.6193	5.92485	4.06769e-118	1.09996e-116
cholangiocyte	AMOTL2	24.5881	2.75863	3.7223e-120	1.03141e-118
cholangiocyte	AMD1	24.5115	1.84848	7.86823e-122	2.22735e-120
cholangiocyte	PLEKHB1	24.4854	5.51884	3.69948e-117	9.96955e-116
cholangiocyte	CYP3A5	24.4387	1.52737	4.7164e-123	1.35962e-121
cholangiocyte	ANXA9	24.3882	3.59598	6.95914e-117	1.86579e-115
cholangiocyte	FAM133B	24.3766	1.5686	1.12109e-121	3.1679e-120
cholangiocyte	GLUL	24.3122	1.47644	5.74257e-122	1.62855e-120
cholangiocyte	TMC4	24.2543	4.39632	1.02445e-115	2.70961e-114
cholangiocyte	RPS9	24.2283	0.614131	3.20943e-122	9.15125e-121
cholangiocyte	ELK4	24.2146	2.65395	5.77853e-117	1.55191e-115
cholangiocyte	ALDH3A2	24.1875	1.80361	3.79495e-118	1.02797e-116
cholangiocyte	GOLM1	24.1416	3.85493	4.18734e-115	1.09646e-113
cholangiocyte	STAT1	24.1332	2.37604	1.8675e-116	4.98985e-115
cholangiocyte	RPL31	24.1192	0.646342	4.1068e-122	1.16887e-120
cholangiocyte	PIM3	24.1085	2.25986	8.50903e-117	2.27743e-115
cholangiocyte	RPLP0	24.1042	0.805911	5.6027e-121	1.56626e-119
cholangiocyte	ALB	24.1026	1.94082	2.74634e-121	7.69122e-120
cholangiocyte	MPC2	24.0631	1.21338	2.34654e-120	6.5366e-119
cholangiocyte	RPS18	24.0594	0.516894	1.23171e-121	3.468e-120
cholangiocyte	TPD52	24.0593	2.67504	3.2419e-115	8.51731e-114
cholangiocyte	YWHAE	24.0419	1.19555	3.75441e-119	1.02942e-117
cholangiocyte	MAL2	24.0372	2.58969	5.39631e-115	1.41067e-113
cholangiocyte	PRSS22	23.9418	8.2774	3.10196e-112	7.93727e-111
cholangiocyte	RASEF	23.9361	6.01386	1.75759e-112	4.51939e-111
cholangiocyte	SHROOM3	23.8446	3.12396	1.09472e-112	2.82416e-111
cholangiocyte	EHD4	23.7769	2.99105	7.54068e-113	1.95176e-111
cholangiocyte	RPL35A	23.738	0.585247	8.76281e-119	2.3943e-117
cholangiocyte	NR0B2	23.7111	2.39009	1.08976e-112	2.816e-111
cholangiocyte	TUBB4B	23.6869	1.4902	1.38452e-115	3.64971e-114
cholangiocyte	ERRFI1	23.6692	1.43549	7.1998e-116	1.91398e-114
cholangiocyte	EIF3E	23.57	1.07303	7.30471e-116	1.93859e-114
cholangiocyte	RPL19	23.5405	0.577703	3.0902e-116	8.2428e-115
cholangiocyte	SLC37A4	23.3847	1.82745	7.79585e-111	1.97868e-109
cholangiocyte	TMEM139	23.356	4.51985	6.7722e-108	1.67293e-106
cholangiocyte	CFTR	23.3351	5.64917	1.38049e-107	3.37832e-106
cholangiocyte	GCNT4	23.3048	4.65311	1.11596e-107	2.73523e-106
cholangiocyte	PDZK1	23.213	2.79067	7.99687e-108	1.97235e-106
cholangiocyte	POLR1D	23.1633	1.59068	3.71537e-110	9.3846e-109
cholangiocyte	PRRG4	23.1573	2.4264	8.15652e-108	2.00858e-106
cholangiocyte	GRB7	23.1497	4.92282	2.74864e-106	6.60303e-105
cholangiocyte	NEBL	23.1489	5.15998	4.55889e-106	1.09351e-104
cholangiocyte	PROM1	23.1346	5.57855	4.82372e-106	1.15527e-104
cholangiocyte	KIF9	23.1107	2.74874	9.96861e-108	2.44714e-106
cholangiocyte	MYADM	23.1024	1.6214	1.56075e-110	3.95499e-109
cholangiocyte	IL20RA	23.0983	6.17447	1.29872e-105	3.09624e-104
cholangiocyte	RRAS2	23.0608	2.46698	2.54479e-107	6.17949e-106
cholangiocyte	KIAA1522	23.0528	4.21834	1.11315e-105	2.65786e-104
cholangiocyte	NFIB	23.014	1.39611	5.54745e-110	1.39673e-108
cholangiocyte	SEMA6A	22.9923	4.99795	4.22324e-105	1.0038e-103
cholangiocyte	TAF1D	22.9736	1.64465	2.62816e-108	6.5334e-107
cholangiocyte	CCNL1	22.9374	1.41002	6.31438e-109	1.58222e-107
cholangiocyte	MARVELD3	22.9342	3.99031	5.66192e-105	1.3417e-103
cholangiocyte	SEL1L3	22.9238	5.06208	2.13178e-104	5.03645e-103
cholangiocyte	RASSF9	22.8589	5.17883	6.61949e-104	1.54991e-102
cholangiocyte	ACP1	22.8558	1.53841	2.03961e-107	4.97582e-106
cholangiocyte	ABCB1	22.8264	3.29949	3.75025e-104	8.8204e-103
cholangiocyte	EIF3D	22.7431	1.45982	2.37868e-107	5.78504e-106
cholangiocyte	MAP3K13	22.7069	1.57232	2.46611e-106	5.93338e-105
cholangiocyte	RPS13	22.7043	0.594867	1.00135e-108	2.50513e-107
cholangiocyte	CIRBP	22.7012	1.08726	1.50042e-108	3.74772e-107
cholangiocyte	IER3	22.6684	1.5654	6.49993e-107	1.57108e-105
cholangiocyte	RPL23	22.6672	0.720404	5.01145e-108	1.24187e-106
cholangiocyte	RPS23	22.6293	0.536724	6.19438e-108	1.5326e-106
cholangiocyte	MYRF	22.6188	4.64908	4.91032e-102	1.12787e-100
cholangiocyte	PDGFD	22.6182	3.82272	1.46614e-102	3.39743e-101
cholangiocyte	SULT1C4	22.6145	4.37416	2.87373e-102	6.62984e-101
cholangiocyte	COX7C	22.6067	0.645804	1.48832e-107	3.63655e-106
cholangiocyte	ALCAM	22.5763	2.3703	2.25369e-103	5.24558e-102
cholangiocyte	CRB3	22.5369	2.92678	4.59521e-102	1.05703e-100
cholangiocyte	EPS8L2	22.5368	2.89431	3.25125e-102	7.4898e-101
cholangiocyte	CA9	22.5213	5.68935	3.95454e-101	9.03049e-100
cholangiocyte	SLC16A7	22.4372	2.84508	5.4453e-102	1.24892e-100
cholangiocyte	USH1C	22.2566	7.15562	8.65823e-99	1.91861e-97
cholangiocyte	RPL9	22.1991	0.62692	4.03163e-104	9.46799e-103
cholangiocyte	RPS7	22.1793	0.588855	2.64098e-104	6.23009e-103
cholangiocyte	SORBS2	22.1067	1.34705	2.28551e-102	5.28053e-101
cholangiocyte	SFPQ	22.0738	1.42328	3.05445e-101	6.98522e-100
cholangiocyte	RAB20	22.0271	2.26143	3.13081e-99	6.9573e-98
cholangiocyte	EGOT	22.0106	6.49598	6.62672e-97	1.43603e-95
cholangiocyte	LURAP1L	22.0079	1.91514	2.95316e-99	6.57182e-98
cholangiocyte	DNALI1	22.0038	2.64299	2.1e-98	4.62735e-97
cholangiocyte	EZR	21.9997	1.85291	5.36904e-100	1.21023e-98
cholangiocyte	VPS37B	21.993	2.72968	1.22232e-98	2.70476e-97
cholangiocyte	PRPF38B	21.9805	1.67554	6.54881e-100	1.46983e-98
cholangiocyte	FAM221A	21.8709	3.35922	1.29754e-96	2.8007e-95
cholangiocyte	WEE1	21.8419	2.02322	7.95515e-98	1.74558e-96
cholangiocyte	DOCK5	21.803	2.75292	1.29776e-96	2.8007e-95
cholangiocyte	EPHB6	21.7553	2.43083	2.71422e-97	5.91445e-96
cholangiocyte	IL18	21.7364	3.79666	2.13542e-95	4.55219e-94
cholangiocyte	BCO2	21.7115	1.72369	3.90235e-97	8.47993e-96
cholangiocyte	UBE2E3	21.6783	1.5984	1.72523e-97	3.77508e-96
cholangiocyte	PYCARD	21.6767	2.42034	2.62243e-96	5.64398e-95
cholangiocyte	RPL7A	21.6666	0.677309	2.20462e-99	4.927e-98
cholangiocyte	ENPP2	21.6507	3.46937	6.3649e-95	1.3477e-93
cholangiocyte	VEPH1	21.6074	7.25549	9.37136e-94	1.94496e-92
cholangiocyte	JUND	21.5679	1.26666	3.9349e-97	8.53885e-96
cholangiocyte	NACA	21.5645	0.716363	1.73469e-98	3.82777e-97
cholangiocyte	MLPH	21.5508	3.30409	4.7637e-94	9.95246e-93
cholangiocyte	CLINT1	21.5382	1.72349	8.85502e-96	1.89281e-94
cholangiocyte	MACC1	21.499	4.9561	2.76412e-93	5.7141e-92
cholangiocyte	TPM3	21.4969	1.65286	8.46812e-96	1.81504e-94
cholangiocyte	TMEM59	21.4918	0.952806	2.811e-97	6.11684e-96
cholangiocyte	GPRC5B	21.4543	3.065	3.78401e-94	7.91619e-93
cholangiocyte	CFLAR	21.4409	1.60386	1.66475e-95	3.55364e-94
cholangiocyte	AP1M2	21.4371	7.45728	1.98745e-92	4.06572e-91
cholangiocyte	PLEKHJ1	21.4261	1.97723	1.3327e-94	2.81426e-93
cholangiocyte	STX3	21.3756	3.46901	9.14176e-93	1.87502e-91
cholangiocyte	RIC3	21.3707	3.46165	8.16144e-93	1.67614e-91
cholangiocyte	RPS19	21.3678	0.508313	2.39962e-97	5.23617e-96
cholangiocyte	RAB32	21.348	1.85266	5.82215e-94	1.21155e-92
cholangiocyte	HIP1R	21.3098	4.0697	6.5692e-92	1.33517e-90
cholangiocyte	GTF3C6	21.2517	1.49977	3.1421e-94	6.58208e-93
cholangiocyte	DSC2	21.25	3.93006	2.17963e-91	4.3959e-90
cholangiocyte	SNAP25	21.24	5.39546	3.77391e-91	7.60153e-90
cholangiocyte	C21orf62	21.2284	4.18962	1.65418e-91	3.34477e-90
cholangiocyte	TOB1	21.211	1.38754	1.58588e-94	3.33991e-93
cholangiocyte	S100A6	21.2025	1.35649	8.6304e-96	1.84731e-94
cholangiocyte	CPD	21.1861	2.41128	4.76844e-92	9.71685e-91
cholangiocyte	MALAT1	21.1576	0.90229	3.83641e-95	8.14512e-94
cholangiocyte	CAPS	21.139	4.16762	1.2018e-90	2.40529e-89
cholangiocyte	SMIM22	21.1364	5.28797	2.11847e-90	4.23451e-89
cholangiocyte	HMGN3	21.1088	1.08582	5.6639e-94	1.18018e-92
cholangiocyte	RPL18	21.0812	0.591804	2.06315e-94	4.32767e-93
cholangiocyte	NUDT14	21.0791	2.57091	5.85988e-91	1.17579e-89
cholangiocyte	HLA-C	21.0072	0.936597	6.72395e-94	1.39736e-92
cholangiocyte	RPL4	20.931	0.786378	5.59001e-93	1.15255e-91
cholangiocyte	RPS2	20.8748	0.655061	7.56812e-93	1.55632e-91
cholangiocyte	NFIC	20.8273	1.252	5.12052e-91	1.03007e-89
cholangiocyte	TMEM30B	20.8179	3.35206	1.61697e-88	3.19549e-87
cholangiocyte	LRRFIP1	20.7489	1.34044	2.88611e-90	5.75427e-89
cholangiocyte	EPHA2	20.7316	2.40791	1.08764e-88	2.15213e-87
cholangiocyte	NUAK2	20.6895	4.45285	3.91084e-87	7.62322e-86
cholangiocyte	GNB5	20.6513	2.33513	3.0016e-88	5.91696e-87
cholangiocyte	ARL4A	20.6272	2.37123	5.48627e-88	1.08013e-86
cholangiocyte	CXCL8	20.5282	3.76201	5.19196e-86	1.0021e-84
cholangiocyte	HINT1	20.5221	0.791078	4.09357e-90	8.14102e-89
cholangiocyte	SH2D3A	20.5105	4.08895	4.99671e-86	9.65599e-85
cholangiocyte	STC1	20.5081	5.2729	1.44662e-85	2.77507e-84
cholangiocyte	SLC6A19	20.5035	6.31287	1.96892e-85	3.76322e-84
cholangiocyte	LINC00671	20.4893	5.48642	2.16417e-85	4.12947e-84
cholangiocyte	TMEM125	20.4858	6.5029	2.71091e-85	5.16256e-84
cholangiocyte	LLGL2	20.4329	3.08927	1.48851e-85	2.85196e-84
cholangiocyte	SNRPE	20.3939	1.09558	7.67258e-88	1.5068e-86
cholangiocyte	SSR2	20.3402	1.09443	1.01182e-87	1.98461e-86
cholangiocyte	ERBB3	20.3389	2.03796	1.0194e-85	1.95792e-84
cholangiocyte	HNMT	20.3251	1.3035	1.26662e-86	2.46285e-85
cholangiocyte	C6orf132	20.2646	4.05081	3.76354e-84	7.06439e-83
cholangiocyte	GALNT3	20.2614	5.27445	8.20421e-84	1.52721e-82
cholangiocyte	WNK2	20.2516	4.07402	3.54382e-84	6.65992e-83
cholangiocyte	AMBP	20.2266	1.42563	7.19951e-88	1.41566e-86
cholangiocyte	RPS4X	20.2073	0.580311	6.55716e-87	1.27657e-85
cholangiocyte	HSPA8	20.2036	1.08634	1.9894e-86	3.85869e-85
cholangiocyte	SCD5	20.1919	2.43517	1.14214e-84	2.16717e-83
cholangiocyte	LSR	20.1178	1.77817	2.52045e-84	4.74805e-83
cholangiocyte	CRYZ	20.1148	1.55027	1.18052e-84	2.23459e-83
cholangiocyte	COBL	20.084	2.32267	2.35753e-83	4.37297e-82
cholangiocyte	GMPR	20.0708	3.19819	4.28142e-83	7.92289e-82
cholangiocyte	TMPRSS2	20.0698	2.64075	5.26624e-83	9.73386e-82
cholangiocyte	SMS	20.0515	1.77385	5.04943e-84	9.44424e-83
cholangiocyte	ZFAS1	20.0103	1.04302	4.29283e-85	8.16521e-84
cholangiocyte	TAX1BP3	20.0073	1.60567	2.22839e-84	4.2029e-83
cholangiocyte	KRT80	20.003	7.1471	1.09736e-81	1.98855e-80
cholangiocyte	SEZ6L2	19.9741	3.59002	4.44604e-82	8.11287e-81
cholangiocyte	CMTM7	19.9617	3.13325	2.602e-82	4.76457e-81
cholangiocyte	ACTN4	19.9491	1.23695	1.34069e-84	2.53473e-83
cholangiocyte	PARD6B	19.9416	2.68565	2.35671e-82	4.32549e-81
cholangiocyte	PPL	19.9376	3.51636	8.00597e-82	1.45749e-80
cholangiocyte	UBE2D2	19.9246	1.19997	4.3851e-84	8.21148e-83
cholangiocyte	KCNJ15	19.9137	5.75344	4.39629e-81	7.9391e-80
cholangiocyte	ANGPTL1	19.8799	2.01742	1.0316e-82	1.89783e-81
cholangiocyte	DSEL	19.8532	2.42197	8.35043e-82	1.51844e-80
cholangiocyte	ABHD3	19.8402	2.39955	1.00545e-81	1.8262e-80
cholangiocyte	LYZ	19.8102	2.837	2.45742e-81	4.44287e-80
cholangiocyte	TJP1	19.6449	1.7736	5.39654e-81	9.73422e-80
cholangiocyte	GCA	19.6196	2.20918	1.59452e-80	2.86303e-79
cholangiocyte	VAPA	19.6023	1.05957	1.13905e-81	2.0617e-80
cholangiocyte	STAP2	19.6023	2.39783	1.02138e-79	1.80913e-78
cholangiocyte	SPHK1	19.5965	2.70944	4.95337e-80	8.83341e-79
cholangiocyte	EBPL	19.5719	1.21631	6.38425e-81	1.15026e-79
cholangiocyte	ARPC5	19.5695	1.1379	1.05468e-81	1.91341e-80
cholangiocyte	PTPRF	19.5383	1.78102	5.95319e-80	1.05804e-78
cholangiocyte	CAPN1	19.5021	1.8194	5.56834e-80	9.90761e-79
cholangiocyte	HMGA1	19.4463	3.11899	2.31387e-78	4.06181e-77
cholangiocyte	CREB5	19.4421	3.37639	2.41069e-78	4.22705e-77
cholangiocyte	BCL7A	19.4342	2.44723	8.84729e-79	1.55655e-77
cholangiocyte	KIF5B	19.4191	1.31086	5.04274e-80	8.9826e-79
cholangiocyte	LIMCH1	19.3416	3.52617	1.977e-77	3.43212e-76
cholangiocyte	HES1	19.3404	1.26683	6.50485e-80	1.15478e-78
cholangiocyte	TMEM9B	19.3333	1.86479	1.77389e-78	3.1174e-77
cholangiocyte	CALM2	19.2768	0.796199	4.33609e-80	7.7414e-79
cholangiocyte	TEX26	19.2657	7.9982	2.57524e-76	4.39779e-75
cholangiocyte	CYSTM1	19.2521	1.10748	2.86389e-79	5.0499e-78
cholangiocyte	IFT57	19.2079	1.84601	7.18235e-78	1.25519e-76
cholangiocyte	CCDC12	19.1519	1.45914	1.2621e-77	2.19346e-76
cholangiocyte	CMPK1	19.1367	1.22589	1.1799e-77	2.05286e-76
cholangiocyte	DAP	19.1159	1.67303	6.01534e-77	1.03854e-75
cholangiocyte	HNRNPF	19.0795	1.17715	2.47681e-77	4.29504e-76
cholangiocyte	CSPP1	18.9429	2.73331	6.83237e-75	1.15052e-73
cholangiocyte	B3GNT7	18.9352	5.34117	3.92938e-74	6.56749e-73
cholangiocyte	RBMX	18.916	1.23994	2.21333e-76	3.78385e-75
cholangiocyte	DDX5	18.9104	0.938524	8.71791e-77	1.50183e-75
cholangiocyte	RPL12	18.9078	0.502566	4.25797e-77	7.37563e-76
cholangiocyte	CHKA	18.8757	3.21252	3.90268e-74	6.52982e-73
cholangiocyte	OFD1	18.8755	2.10746	6.21992e-75	1.04851e-73
cholangiocyte	PTGES3	18.8556	0.997917	4.28146e-76	7.27988e-75
cholangiocyte	GGT6	18.8512	5.80414	1.55285e-73	2.57079e-72
cholangiocyte	PAQR5	18.8394	5.57094	1.89092e-73	3.12718e-72
cholangiocyte	SMYD2	18.7779	2.48759	7.86721e-74	1.30795e-72
cholangiocyte	KLF3	18.7452	1.75835	4.0159e-74	6.70498e-73
cholangiocyte	WWC1	18.7319	2.99784	3.44527e-73	5.67386e-72
cholangiocyte	IRF2BP2	18.6636	1.26614	4.59938e-74	7.671e-73
cholangiocyte	WSB1	18.6608	1.20498	1.46289e-74	2.46075e-73
cholangiocyte	GCC2	18.6424	1.56588	9.74287e-74	1.61808e-72
cholangiocyte	ABLIM1	18.6153	2.20757	9.93104e-73	1.62359e-71
cholangiocyte	IDH2	18.6045	1.27621	1.34163e-73	2.22345e-72
cholangiocyte	EIF4G2	18.4831	1.04743	3.77432e-73	6.20926e-72
cholangiocyte	CLIC1	18.464	1.06942	2.29311e-73	3.78833e-72
cholangiocyte	CTNND1	18.4583	1.61675	3.59673e-72	5.83763e-71
cholangiocyte	FAM107B	18.4263	1.42311	4.33907e-72	7.02795e-71
cholangiocyte	PTMA	18.4234	0.581936	1.20164e-73	1.99355e-72
cholangiocyte	CSTB	18.4192	0.988525	1.07491e-72	1.75368e-71
cholangiocyte	GYPC	18.4048	1.46881	2.09166e-72	3.4054e-71
cholangiocyte	DDR1	18.3925	3.64651	1.06879e-70	1.70648e-69
cholangiocyte	CDC42	18.388	1.08228	1.54272e-72	2.51429e-71
cholangiocyte	UBC	18.3744	0.752691	5.62595e-73	9.22644e-72
cholangiocyte	B3GNT3	18.3655	7.98059	5.38709e-70	8.50619e-69
cholangiocyte	FLNB	18.3048	1.96438	1.14931e-70	1.83318e-69
cholangiocyte	SNX10	18.2753	1.86412	1.76532e-70	2.80434e-69
cholangiocyte	COX7A2L	18.2446	1.0291	2.45113e-71	3.94972e-70
cholangiocyte	RAB17	18.2207	1.64065	3.20762e-70	5.06991e-69
cholangiocyte	ERGIC3	18.1895	1.08372	7.64842e-71	1.22367e-69
cholangiocyte	APEX1	18.1828	1.27795	1.32423e-70	2.1079e-69
cholangiocyte	CCDC141	18.1793	5.0325	6.6009e-69	1.03191e-67
cholangiocyte	SRSF5	18.1609	0.937674	5.08569e-71	8.14488e-70
cholangiocyte	TBC1D8	18.1228	3.29846	7.70985e-69	1.20407e-67
cholangiocyte	TPPP3	18.105	1.3992	1.94765e-70	3.08775e-69
cholangiocyte	UBE2D3	18.0973	0.947118	2.36765e-70	3.74603e-69
cholangiocyte	PLEKHA5	18.0907	1.79687	1.83244e-69	2.87894e-68
cholangiocyte	CLCF1	18.0358	4.01753	4.81174e-68	7.41877e-67
cholangiocyte	AJUBA	17.9992	2.23781	1.56638e-68	2.43658e-67
cholangiocyte	RAP1GAP	17.9693	4.51209	1.85197e-67	2.8194e-66
cholangiocyte	TTYH1	17.9688	3.56222	8.61076e-68	1.32242e-66
cholangiocyte	PTPRK	17.9579	1.66269	1.30163e-68	2.02876e-67
cholangiocyte	RPS5	17.9359	0.563957	1.34948e-69	2.12442e-68
cholangiocyte	TRIB1	17.9157	1.49791	2.27676e-68	3.52762e-67
cholangiocyte	TPGS2	17.913	1.89682	2.90364e-68	4.49448e-67
cholangiocyte	FOXA2	17.9084	2.08594	1.06118e-67	1.62497e-66
cholangiocyte	PPP1R13L	17.8737	2.81407	2.16394e-67	3.2848e-66
cholangiocyte	CBX3	17.873	1.25882	2.18286e-68	3.38549e-67
cholangiocyte	AGRN	17.8591	2.61441	2.17232e-67	3.29433e-66
cholangiocyte	TTN	17.8532	4.73171	8.59691e-67	1.29498e-65
cholangiocyte	GPBP1	17.8381	1.26466	3.01524e-68	4.66264e-67
cholangiocyte	ASPHD1	17.8323	4.99279	1.56163e-66	2.34559e-65
cholangiocyte	SYPL1	17.82	1.14324	2.12286e-68	3.29568e-67
cholangiocyte	LRP10	17.8149	1.45893	5.3924e-68	8.30589e-67
cholangiocyte	FLRT3	17.8	3.70543	2.15207e-66	3.21705e-65
cholangiocyte	STMN1	17.7875	1.6891	1.4033e-67	2.14676e-66
cholangiocyte	XIST	17.737	1.18582	1.63979e-67	2.50367e-66
cholangiocyte	C4orf19	17.6909	3.21486	9.50442e-66	1.41005e-64
cholangiocyte	SF1	17.6823	1.12621	3.21555e-67	4.85764e-66
cholangiocyte	BHLHE41	17.6813	3.47675	7.85901e-66	1.16704e-64
cholangiocyte	S100A13	17.672	1.18653	2.67641e-67	4.05097e-66
cholangiocyte	TMPRSS3	17.6657	6.37104	2.59704e-65	3.82042e-64
cholangiocyte	IQCK	17.6591	2.56182	3.77817e-66	5.63177e-65
cholangiocyte	S100A16	17.5799	1.36167	3.70872e-66	5.5335e-65
cholangiocyte	LGALS3	17.5682	1.17336	9.03354e-67	1.35944e-65
cholangiocyte	FAM83F	17.5644	5.87436	1.25669e-64	1.82644e-63
cholangiocyte	RPL29	17.5629	0.470304	3.85725e-67	5.82144e-66
cholangiocyte	SLC38A1	17.5412	2.82353	3.81347e-65	5.59938e-64
cholangiocyte	PTP4A1	17.5171	0.98931	1.9248e-66	2.88279e-65
cholangiocyte	ARHGEF35	17.5015	3.45156	1.86616e-64	2.70224e-63
cholangiocyte	RAC1	17.4883	0.7844	3.14086e-66	4.69069e-65
cholangiocyte	SMOX	17.4592	3.53401	2.66576e-64	3.84588e-63
cholangiocyte	RASSF8	17.4484	2.77405	2.00868e-64	2.90593e-63
cholangiocyte	LARP6	17.4416	2.31942	1.30604e-64	1.89467e-63
cholangiocyte	ERBB2	17.4205	2.41978	2.18344e-64	3.15584e-63
cholangiocyte	EGLN1	17.4131	1.62363	9.97568e-65	1.45388e-63
cholangiocyte	COMMD2	17.4053	1.80409	9.39938e-65	1.37243e-63
cholangiocyte	MTCH1	17.3945	1.27682	3.90771e-65	5.73241e-64
cholangiocyte	SARAF	17.3884	0.871038	2.58984e-65	3.8134e-64
cholangiocyte	TLE4	17.3767	1.45633	5.50438e-65	8.05207e-64
cholangiocyte	MLF1	17.3627	2.49164	3.86532e-64	5.54594e-63
cholangiocyte	OCIAD2	17.3599	1.0821	5.01426e-65	7.34879e-64
cholangiocyte	PIGR	17.3558	3.15939	1.98385e-63	2.82321e-62
cholangiocyte	NFATC3	17.3535	1.72883	4.07665e-64	5.84382e-63
cholangiocyte	RPLP2	17.3532	0.415759	1.14213e-65	1.69124e-64
cholangiocyte	SMAGP	17.3499	2.74031	8.15465e-64	1.16259e-62
cholangiocyte	ARHGAP24	17.3474	2.13315	3.64147e-64	5.23912e-63
cholangiocyte	SRP9	17.3467	0.940175	5.26488e-65	7.7089e-64
cholangiocyte	TNFRSF21	17.3451	2.28713	3.76405e-64	5.40628e-63
cholangiocyte	SMIM15	17.3388	1.61966	2.74944e-64	3.96298e-63
cholangiocyte	ZDHHC12	17.3346	1.86375	5.81751e-64	8.31655e-63
cholangiocyte	NMT2	17.3172	2.01044	7.09634e-64	1.01263e-62
cholangiocyte	MAB21L2	17.3024	5.06734	5.85927e-63	8.27089e-62
cholangiocyte	PRKAA2	17.2753	2.97907	3.1689e-63	4.49743e-62
cholangiocyte	WFDC2	17.2685	1.85686	5.56949e-64	7.9765e-63
cholangiocyte	HMGN2	17.2592	0.899738	1.21396e-64	1.76597e-63
cholangiocyte	DBNDD1	17.2582	5.19169	1.1303e-62	1.59123e-61
cholangiocyte	THSD4	17.2346	2.74092	7.09193e-63	1.00019e-61
cholangiocyte	KRT10	17.2067	1.01791	6.55226e-64	9.35841e-63
cholangiocyte	SUMO2	17.188	0.714439	3.12472e-64	4.49976e-63
cholangiocyte	STXBP2	17.1761	2.60012	1.22874e-62	1.72827e-61
cholangiocyte	PAPSS1	17.1745	2.05163	5.16574e-63	7.30503e-62
cholangiocyte	ARAP2	17.1561	2.81822	2.22834e-62	3.12584e-61
cholangiocyte	RALYL	17.1189	7.09896	1.1715e-61	1.62448e-60
cholangiocyte	RPS15A	17.1161	0.368901	5.68982e-64	8.14142e-63
cholangiocyte	SNRPB	17.0966	1.10005	3.53572e-63	5.00898e-62
cholangiocyte	SPTBN1	17.0858	1.08618	5.7046e-63	8.0598e-62
cholangiocyte	RPL22	17.0753	0.513233	2.03392e-63	2.89184e-62
cholangiocyte	EDN1	17.0733	4.64075	1.78189e-61	2.45789e-60
cholangiocyte	MORN2	17.0497	1.85549	3.4793e-62	4.86761e-61
cholangiocyte	GAS8	17.0261	3.11615	1.52508e-61	2.11107e-60
cholangiocyte	ZNF33B	17.0025	2.60868	1.88581e-61	2.59895e-60
cholangiocyte	MTCL1	16.9972	5.18466	5.94423e-61	8.11379e-60
cholangiocyte	CYTH2	16.9516	1.52308	6.48733e-62	9.02768e-61
cholangiocyte	DPCD	16.9269	2.26167	3.62049e-61	4.96348e-60
cholangiocyte	DCTPP1	16.9067	1.84112	2.96635e-61	4.07381e-60
cholangiocyte	GULP1	16.9017	2.18826	3.25563e-61	4.46719e-60
cholangiocyte	IRF6	16.897	2.20957	8.46766e-61	1.15083e-59
cholangiocyte	NCK2	16.8464	2.02836	6.41968e-61	8.75517e-60
cholangiocyte	SMC5	16.8429	1.73305	6.76277e-61	9.21508e-60
cholangiocyte	SLC34A2	16.842	6.97	7.9035e-60	1.05858e-58
cholangiocyte	CLTA	16.8269	0.92176	1.96636e-61	2.70759e-60
cholangiocyte	TMA7	16.8106	0.647837	1.75989e-61	2.42967e-60
cholangiocyte	LEFTY1	16.8105	5.7678	1.16411e-59	1.55522e-58
cholangiocyte	RAB11A	16.8087	1.18244	4.61423e-61	6.30933e-60
cholangiocyte	EPB41L4A	16.799	2.93951	3.96164e-60	5.34261e-59
cholangiocyte	TRA2B	16.7969	1.09419	4.5465e-61	6.22213e-60
cholangiocyte	RAB9A	16.7787	1.80885	2.17084e-60	2.93511e-59
cholangiocyte	UNC93B1	16.7754	2.96138	6.84533e-60	9.17637e-59
cholangiocyte	RPL36A	16.768	0.750706	2.022e-61	2.78176e-60
cholangiocyte	RABGGTB	16.7493	1.41108	2.09894e-60	2.84035e-59
cholangiocyte	MCOLN3	16.7457	6.50142	3.11426e-59	4.13594e-58
cholangiocyte	SPTAN1	16.738	1.62167	2.80921e-60	3.79497e-59
cholangiocyte	SRP14	16.7232	0.607305	4.38658e-61	6.0085e-60
cholangiocyte	CTNND2	16.7145	7.92716	5.5112e-59	7.27006e-58
cholangiocyte	SEMA3E	16.7029	5.30333	5.06539e-59	6.69885e-58
cholangiocyte	MYO6	16.6946	1.81903	6.04235e-60	8.12073e-59
cholangiocyte	STXBP3	16.6928	1.7796	5.96273e-60	8.02058e-59
cholangiocyte	APH1A	16.6852	1.43354	5.93395e-60	7.98871e-59
cholangiocyte	NDFIP2	16.6787	1.62345	1.13983e-59	1.52407e-58
cholangiocyte	SEC11A	16.6737	0.938792	2.87444e-60	3.87975e-59
cholangiocyte	MAP3K1	16.6371	2.4904	3.77666e-59	5.00296e-58
cholangiocyte	RAP2B	16.6304	2.84267	5.17672e-59	6.84033e-58
cholangiocyte	RASSF4	16.6065	1.99358	2.95846e-59	3.93568e-58
cholangiocyte	SRSF2	16.606	0.971548	6.35683e-60	8.53608e-59
cholangiocyte	EIF3L	16.5899	0.904666	6.63382e-60	8.90042e-59
cholangiocyte	SSU72	16.576	1.02244	1.42167e-59	1.8977e-58
cholangiocyte	COL27A1	16.5697	1.93505	5.7777e-59	7.60883e-58
cholangiocyte	ELOVL7	16.5331	6.81688	7.5529e-58	9.75051e-57
cholangiocyte	EFNA1	16.5314	1.40866	5.73861e-59	7.5637e-58
cholangiocyte	SMIM6	16.5241	4.0143	6.56364e-58	8.49435e-57
cholangiocyte	FOXP1	16.5144	1.16574	3.78606e-59	5.01119e-58
cholangiocyte	TP53I3	16.4886	2.48228	4.25881e-58	5.5252e-57
cholangiocyte	FZD1	16.4844	2.46783	2.87416e-58	3.74117e-57
cholangiocyte	EIF3M	16.4808	1.05606	6.06499e-59	7.98049e-58
cholangiocyte	CERS2	16.478	1.16249	1.08358e-58	1.41986e-57
cholangiocyte	PRDX5	16.4676	0.760778	5.24979e-59	6.93104e-58
cholangiocyte	RBM39	16.4576	0.917498	6.71023e-59	8.81475e-58
cholangiocyte	CNDP2	16.4493	1.45388	2.6903e-58	3.50475e-57
cholangiocyte	KDF1	16.445	4.96357	2.44812e-57	3.13723e-56
cholangiocyte	RPL32	16.4447	0.376551	2.89318e-59	3.8521e-58
cholangiocyte	CYS1	16.4265	4.49502	2.43317e-57	3.12062e-56
cholangiocyte	CPB2	16.4048	0.984918	9.01248e-59	1.18193e-57
cholangiocyte	CCDC50	16.3729	1.36296	6.86798e-58	8.88089e-57
cholangiocyte	SYNJ2	16.3704	2.72699	2.27873e-57	2.92493e-56
cholangiocyte	LDHB	16.3623	0.99785	1.68861e-58	2.20713e-57
cholangiocyte	SCGB3A1	16.3575	3.9955	6.82733e-57	8.71358e-56
cholangiocyte	MAPK13	16.3348	4.20658	8.56114e-57	1.09087e-55
cholangiocyte	AHNAK	16.323	1.06341	6.14809e-58	7.96312e-57
cholangiocyte	INSIG2	16.3221	1.47236	1.85688e-57	2.38735e-56
cholangiocyte	CLDN23	16.3191	3.30663	8.82061e-57	1.12302e-55
cholangiocyte	OAZ1	16.2914	0.661706	5.40293e-58	7.00374e-57
cholangiocyte	SON	16.2886	0.882403	7.1403e-58	9.22543e-57
cholangiocyte	TSPAN15	16.2689	2.82423	9.35161e-57	1.18966e-55
cholangiocyte	NEU1	16.2665	1.69609	3.80254e-57	4.86101e-56
cholangiocyte	RBM3	16.2622	1.05771	1.1997e-57	1.54622e-56
cholangiocyte	CD164	16.2524	0.955713	1.89332e-57	2.43221e-56
cholangiocyte	NME5	16.2162	4.92368	6.27801e-56	7.8781e-55
cholangiocyte	RPL41	16.2034	0.322155	1.41416e-57	1.82114e-56
cholangiocyte	COX4I1	16.1987	0.567301	2.57134e-57	3.29245e-56
cholangiocyte	GIPC1	16.1887	1.8304	1.3719e-56	1.74102e-55
cholangiocyte	P4HTM	16.1861	1.70631	1.18383e-56	1.50479e-55
cholangiocyte	PALM3	16.1297	2.76115	1.41789e-55	1.77502e-54
cholangiocyte	ELF1	16.1174	1.46705	3.247e-56	4.09419e-55
cholangiocyte	TC2N	16.1167	4.31094	2.16037e-55	2.69378e-54
cholangiocyte	TMED9	16.1093	1.032	1.95696e-56	2.4815e-55
cholangiocyte	DUSP6	16.107	1.40271	3.61932e-56	4.55999e-55
cholangiocyte	IFT22	16.1006	1.85242	5.68279e-56	7.14259e-55
cholangiocyte	PNN	16.0949	1.1096	2.40171e-56	3.043e-55
cholangiocyte	SPAG1	16.0848	3.5684	3.31876e-55	4.12509e-54
cholangiocyte	VDAC1	16.0757	0.937556	2.96845e-56	3.74898e-55
cholangiocyte	CDS1	16.0467	4.92858	7.21768e-55	8.94298e-54
cholangiocyte	RSL24D1	16.0439	0.914261	3.04402e-56	3.84134e-55
cholangiocyte	LEPROT	16.0262	1.02177	5.34575e-56	6.72435e-55
cholangiocyte	UFC1	16.0156	0.983562	7.14641e-56	8.95353e-55
cholangiocyte	AQP3	16.0113	1.52053	2.63149e-55	3.27342e-54
cholangiocyte	TRNP1	16.0047	3.83182	8.35675e-55	1.0338e-53
cholangiocyte	CCNC	15.9905	1.44363	2.32729e-55	2.8973e-54
cholangiocyte	VCAN	15.9898	1.87577	1.79678e-55	2.24576e-54
cholangiocyte	EFHC1	15.9297	2.15372	9.36982e-55	1.15731e-53
cholangiocyte	SMARCA4	15.9239	2.00279	9.06066e-55	1.12e-53
cholangiocyte	TMEM63A	15.9228	2.23401	1.30587e-54	1.60788e-53
cholangiocyte	ZNF706	15.9093	1.00889	3.64342e-55	4.52504e-54
cholangiocyte	SRSF3	15.8616	0.844885	3.98346e-55	4.94346e-54
cholangiocyte	ZKSCAN1	15.8575	1.21555	1.34647e-54	1.65657e-53
cholangiocyte	PSMA3-AS1	15.8561	1.25149	1.02448e-54	1.26438e-53
cholangiocyte	RGP1	15.8519	2.47258	3.86185e-54	4.70703e-53
cholangiocyte	PTPN2	15.8315	1.59654	2.44748e-54	2.99008e-53
cholangiocyte	BAALC	15.8122	4.74353	1.95477e-53	2.35697e-52
cholangiocyte	VGLL4	15.7989	1.44731	2.57853e-54	3.14773e-53
cholangiocyte	TMEM123	15.7986	0.919451	1.7606e-54	2.161e-53
cholangiocyte	CAPG	15.7687	2.65936	1.36903e-53	1.65579e-52
cholangiocyte	INSR	15.7621	1.27714	5.68819e-54	6.91696e-53
cholangiocyte	PCBP1	15.7282	0.844302	4.24852e-54	5.1743e-53
cholangiocyte	ENAH	15.7277	1.39389	6.2013e-54	7.53508e-53
cholangiocyte	SVIP	15.7246	1.38616	9.54632e-54	1.15638e-52
cholangiocyte	P2RY1	15.7229	4.62291	6.65362e-53	7.95548e-52
cholangiocyte	F2RL1	15.7209	4.27232	6.90678e-53	8.25189e-52
cholangiocyte	RFX2	15.7105	2.5469	3.12553e-53	3.75709e-52
cholangiocyte	FUS	15.6658	0.904282	7.83419e-54	9.49714e-53
cholangiocyte	C11orf54	15.6401	1.09878	2.63652e-53	3.17413e-52
cholangiocyte	DDX17	15.6374	0.894472	1.59464e-53	1.92719e-52
cholangiocyte	HNRNPD	15.6139	1.0581	3.07747e-53	3.70215e-52
cholangiocyte	CXCL3	15.5905	3.17665	2.92871e-52	3.47267e-51
cholangiocyte	TOM1L1	15.5745	1.8261	1.79973e-52	2.14371e-51
cholangiocyte	HMGB1	15.5443	0.61567	4.29448e-53	5.1465e-52
cholangiocyte	APCDD1	15.5417	3.56464	6.22565e-52	7.3653e-51
cholangiocyte	PKP4	15.5145	2.42559	6.3379e-52	7.49245e-51
cholangiocyte	VEGFA	15.5083	1.33814	2.57634e-52	3.06179e-51
cholangiocyte	CHD7	15.5055	2.53686	7.25475e-52	8.55059e-51
cholangiocyte	CBX5	15.5053	1.5021	2.49311e-52	2.96512e-51
cholangiocyte	PTPN14	15.4975	2.58673	6.42611e-52	7.59103e-51
cholangiocyte	COLCA1	15.4769	4.60399	2.3111e-51	2.68961e-50
cholangiocyte	ZFP36	15.4747	0.908702	9.16915e-53	1.09465e-51
cholangiocyte	GALNT18	15.4745	2.44672	7.92762e-52	9.32267e-51
cholangiocyte	CD2AP	15.4743	1.96783	7.90473e-52	9.30271e-51
cholangiocyte	MIR4435-2HG	15.4455	1.54559	4.6268e-52	5.4779e-51
cholangiocyte	GMCL1	15.4411	1.78241	9.31135e-52	1.09172e-50
cholangiocyte	CCND3	15.4293	1.90642	1.00828e-51	1.18129e-50
cholangiocyte	PLK2	15.4205	1.50029	8.22797e-52	9.66863e-51
cholangiocyte	NFKBIE	15.4172	2.80643	2.70556e-51	3.14634e-50
cholangiocyte	LAMC1	15.4049	1.7332	1.23499e-51	1.44367e-50
cholangiocyte	PLPP4	15.399	3.02216	3.8026e-51	4.41557e-50
cholangiocyte	SLFN13	15.3872	3.81648	5.59852e-51	6.47228e-50
cholangiocyte	RBM23	15.3625	1.47166	1.85952e-51	2.16728e-50
cholangiocyte	C1orf198	15.3517	1.79629	2.18141e-51	2.54056e-50
cholangiocyte	PPIA	15.3369	0.635251	9.15007e-52	1.07361e-50
cholangiocyte	SUB1	15.3354	0.73503	1.26737e-51	1.48042e-50
cholangiocyte	SLC7A7	15.3352	3.36082	1.18032e-50	1.35655e-49
cholangiocyte	BSPRY	15.3214	5.6825	2.3054e-50	2.64573e-49
cholangiocyte	LMO7	15.3181	1.46625	5.11809e-51	5.92996e-50
cholangiocyte	RPL13A	15.3172	0.330841	6.97555e-52	8.22769e-51
cholangiocyte	ABHD11	15.3169	2.00221	5.89485e-51	6.79985e-50
cholangiocyte	GLS	15.3075	1.93176	5.5789e-51	6.45436e-50
cholangiocyte	RPS21	15.3017	0.489566	1.1383e-51	1.33262e-50
cholangiocyte	PPP1R16A	15.2994	1.21026	4.85916e-51	5.63411e-50
cholangiocyte	HDAC1	15.2898	1.61433	5.75774e-51	6.65146e-50
cholangiocyte	MAFK	15.2797	1.9844	9.1691e-51	1.05613e-49
cholangiocyte	SDC1	15.2545	1.07703	6.45471e-51	7.44021e-50
cholangiocyte	RPS25	15.2295	0.352911	2.86754e-51	3.33225e-50
cholangiocyte	STK17A	15.2249	2.06999	2.43525e-50	2.79272e-49
cholangiocyte	RIPK4	15.223	2.38862	4.45676e-50	5.08129e-49
cholangiocyte	SH3RF1	15.2228	2.2759	3.16494e-50	3.61895e-49
cholangiocyte	PIK3AP1	15.2193	1.76583	2.9855e-50	3.41626e-49
cholangiocyte	RBBP8	15.217	2.52164	4.11615e-50	4.69977e-49
cholangiocyte	RSRC2	15.2098	1.04875	9.70981e-51	1.11759e-49
cholangiocyte	CHDH	15.1953	1.75992	4.2185e-50	4.81313e-49
cholangiocyte	YWHAZ	15.1884	0.973958	1.07424e-50	1.23553e-49
cholangiocyte	PRR7	15.1529	2.82383	1.14644e-49	1.29768e-48
cholangiocyte	DTNA	15.145	2.32012	7.04959e-50	8.00839e-49
cholangiocyte	ISG20	15.13	2.03065	8.95338e-50	1.01491e-48
cholangiocyte	TUBB2A	15.1138	1.3383	5.8353e-50	6.63855e-49
cholangiocyte	ZG16B	15.0984	6.17799	5.07994e-49	5.67241e-48
cholangiocyte	SLC25A3	15.0912	0.71169	4.07709e-50	4.65855e-49
cholangiocyte	EEF2	15.0882	0.642052	2.7095e-50	3.10269e-49
cholangiocyte	SRGAP1	15.0838	2.20147	1.80143e-49	2.02738e-48
cholangiocyte	GPR108	15.0827	1.57328	1.21936e-49	1.37822e-48
cholangiocyte	ZFHX4	15.0821	1.92808	2.20579e-49	2.48068e-48
cholangiocyte	RPS15	15.0748	0.34145	2.65109e-50	3.03802e-49
cholangiocyte	NAALADL2	15.0584	2.97092	4.62221e-49	5.16865e-48
cholangiocyte	CLIC6	15.05	4.13807	6.74055e-49	7.51602e-48
cholangiocyte	DNAJB11	15.042	1.1891	1.43418e-49	1.61754e-48
cholangiocyte	HDAC7	15.0357	2.15519	2.95723e-49	3.32102e-48
cholangiocyte	WWC2	15.0126	1.61468	4.19556e-49	4.7016e-48
cholangiocyte	DNAJC22	14.998	1.84794	7.67797e-49	8.53706e-48
cholangiocyte	TRIM47	14.9863	1.78489	4.94505e-49	5.52573e-48
cholangiocyte	YTHDC1	14.9757	1.19285	3.63376e-49	4.07786e-48
cholangiocyte	RPL28	14.9698	0.43921	1.35885e-49	1.53479e-48
cholangiocyte	CD46	14.9677	1.15356	4.28119e-49	4.79414e-48
cholangiocyte	RPS10	14.9578	0.579632	1.78869e-49	2.01448e-48
cholangiocyte	EIF4B	14.9507	0.862123	3.81521e-49	4.27842e-48
cholangiocyte	F11R	14.9479	1.72735	1.35577e-48	1.50216e-47
cholangiocyte	PROSER2	14.9477	2.45187	2.09214e-48	2.31477e-47
cholangiocyte	KCNK15	14.9305	4.01658	3.73759e-48	4.12369e-47
cholangiocyte	SNRPD1	14.9065	0.962614	7.43091e-49	8.27407e-48
cholangiocyte	HNRNPC	14.9036	0.809182	6.72081e-49	7.49934e-48
cholangiocyte	LPAR2	14.8982	4.93359	6.92077e-48	7.59303e-47
cholangiocyte	BEX5	14.8969	3.40901	5.28313e-48	5.80848e-47
cholangiocyte	ILF2	14.8949	1.19997	1.10678e-48	1.22887e-47
cholangiocyte	PLEKHF2	14.8891	2.07706	2.60325e-48	2.87824e-47
cholangiocyte	HOGA1	14.8854	2.0799	3.97854e-48	4.38645e-47
cholangiocyte	MPZL2	14.8791	2.95651	7.08704e-48	7.77002e-47
cholangiocyte	TMEM54	14.8758	2.2859	3.47413e-48	3.83571e-47
cholangiocyte	FHIT	14.8554	2.29579	6.48772e-48	7.12289e-47
cholangiocyte	UNC13D	14.8449	3.39744	1.00368e-47	1.09581e-46
cholangiocyte	ACTB	14.8327	0.578049	7.44883e-49	8.28814e-48
cholangiocyte	MPST	14.8229	0.840824	1.84776e-48	2.04582e-47
cholangiocyte	KCNK5	14.8166	3.63474	1.89973e-47	2.06266e-46
cholangiocyte	NCEH1	14.8015	3.94811	2.26454e-47	2.45028e-46
cholangiocyte	INTS10	14.7997	1.34887	5.27867e-48	5.80764e-47
cholangiocyte	TICAM1	14.7827	2.44969	1.8029e-47	1.96023e-46
cholangiocyte	HPCAL1	14.7778	1.8581	1.06958e-47	1.16695e-46
cholangiocyte	PPP1CA	14.7756	1.02755	5.01941e-48	5.52627e-47
cholangiocyte	ADD3	14.7738	1.5157	8.07779e-48	8.8316e-47
cholangiocyte	BLNK	14.7585	1.90401	2.04074e-47	2.2127e-46
cholangiocyte	ENO1	14.7533	0.810406	5.49338e-48	6.03542e-47
cholangiocyte	RPL10	14.7328	0.325335	3.23361e-48	3.57266e-47
cholangiocyte	KHDRBS1	14.7315	0.99165	7.93215e-48	8.68446e-47
cholangiocyte	MARVELD2	14.7314	2.35665	4.0157e-47	4.31537e-46
cholangiocyte	FNBP1L	14.7296	1.95437	2.32352e-47	2.51238e-46
cholangiocyte	EPS8L1	14.7212	2.56233	3.1902e-47	3.43768e-46
cholangiocyte	SCTR	14.7174	4.70655	7.4815e-47	8.02333e-46
cholangiocyte	SERBP1	14.7151	0.763813	9.40711e-48	1.02778e-46
cholangiocyte	PPP4R2	14.71	1.15856	1.88727e-47	2.05054e-46
cholangiocyte	RHOU	14.7091	1.58416	2.97981e-47	3.21317e-46
cholangiocyte	PNPLA2	14.6795	1.27637	2.59671e-47	2.80391e-46
cholangiocyte	RBM47	14.6656	1.39849	4.78866e-47	5.14249e-46
cholangiocyte	SHTN1	14.6026	2.04482	1.94006e-46	2.07208e-45
cholangiocyte	ARHGAP5	14.5954	1.34962	9.49638e-47	1.01772e-45
cholangiocyte	RPS14	14.5764	0.309954	3.9122e-47	4.20702e-46
cholangiocyte	CCDC186	14.5748	1.60597	1.42523e-46	1.52532e-45
cholangiocyte	NPEPPS	14.5441	1.43741	1.90212e-46	2.03294e-45
cholangiocyte	HKDC1	14.5404	6.57003	9.87362e-46	1.0432e-44
cholangiocyte	PRRC2C	14.5398	1.00529	1.24561e-46	1.334e-45
cholangiocyte	CTBP2	14.5229	1.47704	1.96963e-46	2.10081e-45
cholangiocyte	GRN	14.5076	1.04806	1.94801e-46	2.07915e-45
cholangiocyte	CLCN3	14.5061	1.93102	5.54235e-46	5.87953e-45
cholangiocyte	TRAPPC4	14.4988	1.28285	2.87568e-46	3.06304e-45
cholangiocyte	PER2	14.4851	1.57355	5.26958e-46	5.59773e-45
cholangiocyte	ARRDC1	14.4769	1.98313	7.6712e-46	8.12145e-45
cholangiocyte	SPNS2	14.471	4.44244	1.99836e-45	2.10008e-44
cholangiocyte	LRRC1	14.4454	4.98789	2.98362e-45	3.12296e-44
cholangiocyte	EIF1AX	14.4264	0.758796	5.3716e-46	5.70224e-45
cholangiocyte	CDC42SE2	14.4117	1.75406	1.48759e-45	1.56436e-44
cholangiocyte	CXCL16	14.4078	2.2208	2.18224e-45	2.29178e-44
cholangiocyte	ARPC3	14.3872	0.769999	8.07607e-46	8.54432e-45
cholangiocyte	TRIOBP	14.3489	1.59416	2.81873e-45	2.95234e-44
cholangiocyte	PAFAH1B3	14.3286	2.37508	7.08142e-45	7.35821e-44
cholangiocyte	UBXN4	14.3219	0.856645	2.53099e-45	2.6545e-44
cholangiocyte	FAM200B	14.3176	1.03866	3.23497e-45	3.38379e-44
cholangiocyte	GABRP	14.3071	5.47038	1.97994e-44	2.04381e-43
cholangiocyte	CCT6A	14.2913	1.0907	4.26657e-45	4.45101e-44
cholangiocyte	CCT2	14.2874	1.11998	4.55182e-45	4.74543e-44
cholangiocyte	FUT4	14.2671	4.18878	2.81085e-44	2.88825e-43
cholangiocyte	JUP	14.2602	1.80398	1.27574e-44	1.31863e-43
cholangiocyte	ATXN7L3B	14.2468	1.47733	1.13568e-44	1.17541e-43
cholangiocyte	CDH2	14.2432	1.23965	1.13555e-44	1.17541e-43
cholangiocyte	HNRNPA2B1	14.2314	0.656631	6.08149e-45	6.33176e-44
cholangiocyte	GAL3ST1	14.2195	4.65569	5.75731e-44	5.89271e-43
cholangiocyte	PGK1	14.218	0.898799	9.65466e-45	1.00056e-43
cholangiocyte	PTAR1	14.2173	1.60078	2.09904e-44	2.16533e-43
cholangiocyte	RPS28	14.2147	0.322813	6.29743e-45	6.54791e-44
cholangiocyte	LRBA	14.1987	2.20555	3.87179e-44	3.9732e-43
cholangiocyte	DAPK3	14.1922	1.39252	1.79134e-44	1.85035e-43
cholangiocyte	HNRNPK	14.1871	0.701122	1.21642e-44	1.25814e-43
cholangiocyte	TLR5	14.1808	3.89554	7.87933e-44	8.03324e-43
cholangiocyte	ATXN10	14.1748	1.21368	2.53588e-44	2.60741e-43
cholangiocyte	PFKFB3	14.1726	2.26692	5.48818e-44	5.62091e-43
cholangiocyte	CDKN1C	14.1639	1.76656	3.6052e-44	3.70205e-43
cholangiocyte	VTCN1	14.1455	5.8817	1.67831e-43	1.70336e-42
cholangiocyte	SHANK2	14.1386	2.64249	1.15267e-43	1.17214e-42
cholangiocyte	MPP1	14.1382	1.91185	6.75089e-44	6.8917e-43
cholangiocyte	ADAM10	14.1281	1.70097	7.16009e-44	7.30469e-43
cholangiocyte	SHB	14.1214	1.97958	1.18782e-43	1.20711e-42
cholangiocyte	ORMDL2	14.09	1.26084	8.846e-44	9.0071e-43
cholangiocyte	TCP1	14.0846	1.03517	6.46488e-44	6.60401e-43
cholangiocyte	PPP1R11	14.0833	1.2607	8.06205e-44	8.21419e-43
cholangiocyte	FXYD3	14.0753	4.00805	3.33325e-43	3.3656e-42
cholangiocyte	GRHL2	14.0746	6.9443	4.52371e-43	4.54777e-42
cholangiocyte	NELFE	14.0349	1.17983	1.37228e-43	1.39366e-42
cholangiocyte	WAC	14.0273	1.18372	1.73891e-43	1.76372e-42
cholangiocyte	REC8	14.0055	3.55785	7.45357e-43	7.4493e-42
cholangiocyte	TSPAN6	14.0015	1.17394	3.0453e-43	3.07881e-42
cholangiocyte	SUMF2	13.9891	1.26074	3.0991e-43	3.13119e-42
cholangiocyte	SQLE	13.9808	1.89022	5.73986e-43	5.74388e-42
cholangiocyte	GABRB3	13.9741	5.83014	1.59394e-42	1.57797e-41
cholangiocyte	SERPINA6	13.971	0.90517	2.46851e-43	2.49728e-42
cholangiocyte	DAPK1	13.9634	2.07186	8.70715e-43	8.69111e-42
cholangiocyte	CAPN2	13.9541	1.27632	3.97126e-43	3.99696e-42
cholangiocyte	DPP7	13.9529	0.992931	3.92526e-43	3.95319e-42
cholangiocyte	LPGAT1	13.95	1.28983	6.36282e-43	6.36322e-42
cholangiocyte	ICA1	13.9465	2.99372	1.48316e-42	1.47108e-41
cholangiocyte	PHIP	13.9428	1.29381	5.16775e-43	5.18458e-42
cholangiocyte	AKAP13	13.9379	1.05194	4.52433e-43	4.54777e-42
cholangiocyte	TRPV6	13.9171	6.29291	3.27725e-42	3.22612e-41
cholangiocyte	HABP2	13.9152	1.20142	9.83247e-43	9.8019e-42
cholangiocyte	APRT	13.9147	0.765392	5.53688e-43	5.54783e-42
cholangiocyte	CCNB1IP1	13.9106	1.30226	9.90816e-43	9.87109e-42
cholangiocyte	C1orf43	13.9011	0.927781	8.04278e-43	8.03307e-42
cholangiocyte	RFK	13.8935	1.45725	1.36593e-42	1.35652e-41
cholangiocyte	MBP	13.886	1.58872	1.74614e-42	1.72756e-41
cholangiocyte	FBL	13.8765	0.991636	1.06827e-42	1.0636e-41
cholangiocyte	ZNF22	13.8604	1.17205	1.53192e-42	1.51753e-41
cholangiocyte	CNN3	13.8581	0.819264	9.44692e-43	9.42353e-42
cholangiocyte	SYNE4	13.8433	3.31647	6.55362e-42	6.4192e-41
cholangiocyte	FAM110C	13.8373	2.01505	4.95694e-42	4.8735e-41
cholangiocyte	SCAF11	13.829	0.904257	1.93918e-42	1.91493e-41
cholangiocyte	RTP4	13.8273	2.89834	6.31842e-42	6.19268e-41
cholangiocyte	IQGAP2	13.8234	0.991224	2.41161e-42	2.37995e-41
cholangiocyte	SLC16A11	13.8175	3.10649	8.39026e-42	8.20283e-41
cholangiocyte	ONECUT2	13.8054	1.48444	5.8136e-42	5.70503e-41
cholangiocyte	CFAP221	13.7973	3.0081	9.0621e-42	8.85414e-41
cholangiocyte	EIF1B	13.7931	0.814766	2.77425e-42	2.73611e-41
cholangiocyte	VEZF1	13.7919	1.36158	3.85515e-42	3.79263e-41
cholangiocyte	PIAS1	13.7575	1.52745	7.16506e-42	7.01372e-41
cholangiocyte	TGOLN2	13.7564	0.963064	5.83774e-42	5.72514e-41
cholangiocyte	TRIP6	13.7229	1.11548	8.21882e-42	8.04021e-41
cholangiocyte	MAP2K3	13.7212	1.44416	1.37486e-41	1.33998e-40
cholangiocyte	HNRNPDL	13.72	0.717444	5.76051e-42	5.66e-41
cholangiocyte	AFF4	13.7187	1.15145	9.34102e-42	9.12099e-41
cholangiocyte	PLK3	13.7075	1.40932	1.22364e-41	1.19408e-40
cholangiocyte	KLHL5	13.6776	1.78407	2.97124e-41	2.8869e-40
cholangiocyte	SH2D4A	13.6636	1.87604	4.18225e-41	4.05351e-40
cholangiocyte	LGALS2	13.6626	3.26261	6.23017e-41	6.02723e-40
cholangiocyte	RPL17	13.6566	0.777307	1.28495e-41	1.25312e-40
cholangiocyte	RTN3	13.645	1.01901	2.37837e-41	2.31372e-40
cholangiocyte	FKBP1A	13.617	0.836863	2.55911e-41	2.48801e-40
cholangiocyte	TRIM56	13.6148	1.28995	4.15899e-41	4.03345e-40
cholangiocyte	SRSF1	13.6073	1.15692	3.92483e-41	3.80871e-40
cholangiocyte	SLC35B2	13.6033	1.587	5.90704e-41	5.72167e-40
cholangiocyte	BARD1	13.5936	2.34063	8.98295e-41	8.66366e-40
cholangiocyte	ATXN2L	13.5921	1.8906	7.95704e-41	7.68838e-40
cholangiocyte	PCCA	13.5793	1.53534	8.83248e-41	8.52902e-40
cholangiocyte	LRRIQ1	13.5684	5.35391	2.58703e-40	2.47232e-39
cholangiocyte	MOB3B	13.5534	2.10874	1.30248e-40	1.25158e-39
cholangiocyte	TGFA	13.5505	3.90602	2.97169e-40	2.83819e-39
cholangiocyte	ESRP1	13.541	6.76849	3.96038e-40	3.76416e-39
cholangiocyte	C1orf210	13.532	3.41762	3.41891e-40	3.25542e-39
cholangiocyte	BPTF	13.5283	1.2201	1.14679e-40	1.10399e-39
cholangiocyte	NONO	13.5272	0.970291	1.09217e-40	1.05206e-39
cholangiocyte	TRAPPC1	13.5264	0.832347	8.94411e-41	8.63151e-40
cholangiocyte	STK33	13.5151	6.6824	5.50984e-40	5.22106e-39
cholangiocyte	EIF4A1	13.4973	0.809605	1.08745e-40	1.04815e-39
cholangiocyte	GATA6	13.4957	1.67495	2.39096e-40	2.28912e-39
cholangiocyte	EXOC7	13.4936	1.36749	2.04321e-40	1.96096e-39
cholangiocyte	TCTN1	13.4801	1.80415	3.14686e-40	3.00184e-39
cholangiocyte	SRSF6	13.4789	1.14025	2.22649e-40	2.13425e-39
cholangiocyte	SNHG7	13.4756	1.15321	2.18631e-40	2.09701e-39
cholangiocyte	CCT8	13.4532	0.933297	2.37035e-40	2.27077e-39
cholangiocyte	CCT3	13.4512	0.905777	2.5264e-40	2.41584e-39
cholangiocyte	PRPF38A	13.4493	1.3885	3.46389e-40	3.29625e-39
cholangiocyte	LAMB3	13.442	3.81427	1.07294e-39	1.01365e-38
cholangiocyte	GATAD1	13.4341	1.52382	5.24013e-40	4.96848e-39
cholangiocyte	RIC8B	13.4312	2.16172	7.59482e-40	7.18809e-39
cholangiocyte	ARHGEF28	13.4295	3.6245	1.33096e-39	1.25514e-38
cholangiocyte	CKS1B	13.4117	1.1249	5.88379e-40	5.57204e-39
cholangiocyte	CSRNP1	13.4043	1.12173	5.01299e-40	4.75598e-39
cholangiocyte	SKP1	13.3993	0.55309	3.37743e-40	3.21788e-39
cholangiocyte	RCAN3	13.3981	3.2108	1.54239e-39	1.45278e-38
cholangiocyte	LIF	13.3869	4.95842	2.36578e-39	2.21903e-38
cholangiocyte	BTF3	13.3834	0.524082	4.18517e-40	3.97541e-39
cholangiocyte	RBP1	13.3778	0.986291	4.71733e-40	4.47818e-39
cholangiocyte	ZBTB16	13.3732	1.05126	8.20293e-40	7.75896e-39
cholangiocyte	CEP57	13.361	1.15701	1.15162e-39	1.08733e-38
cholangiocyte	KANSL1L	13.3561	2.27994	2.00767e-39	1.88764e-38
cholangiocyte	ZFP36L2	13.3519	0.820387	8.35677e-40	7.89971e-39
cholangiocyte	KLHDC9	13.3467	2.50843	2.43778e-39	2.28384e-38
cholangiocyte	PCLO	13.3408	4.74159	4.19638e-39	3.90114e-38
cholangiocyte	HEBP1	13.331	0.952793	1.44975e-39	1.36635e-38
cholangiocyte	GLRB	13.3109	3.51791	4.91976e-39	4.57093e-38
cholangiocyte	DPP10-AS1	13.3096	5.79473	6.63545e-39	6.13955e-38
cholangiocyte	MCCC1	13.2959	1.71069	3.66835e-39	3.41431e-38
cholangiocyte	DALRD3	13.2953	1.85529	3.34198e-39	3.11792e-38
cholangiocyte	RAB10	13.2951	1.08959	2.17325e-39	2.04088e-38
cholangiocyte	HSPH1	13.2949	1.4424	2.69468e-39	2.52e-38
cholangiocyte	TSPAN4	13.2856	1.13918	2.19854e-39	2.0634e-38
cholangiocyte	FTCD	13.2814	0.885871	2.15396e-39	2.02397e-38
cholangiocyte	ITPA	13.2689	1.28883	3.5928e-39	3.34795e-38
cholangiocyte	ENSA	13.2632	0.912523	2.95154e-39	2.75693e-38
cholangiocyte	MICAL3	13.2605	1.89865	6.1288e-39	5.68081e-38
cholangiocyte	CASZ1	13.2601	3.4168	9.40399e-39	8.68583e-38
cholangiocyte	MAOB	13.2592	0.935303	3.60108e-39	3.35368e-38
cholangiocyte	NCL	13.2579	0.779158	2.65844e-39	2.48759e-38
cholangiocyte	OLA1	13.2552	1.20804	3.98535e-39	3.70715e-38
cholangiocyte	HYAL2	13.2512	1.62325	5.21234e-39	4.83704e-38
cholangiocyte	CTSS	13.241	1.56314	6.38797e-39	5.91754e-38
cholangiocyte	RASSF8-AS1	13.2291	1.85811	8.53573e-39	7.88852e-38
cholangiocyte	B4GALT4	13.2047	1.83986	1.11557e-38	1.02916e-37
cholangiocyte	TRAPPC6A	13.1858	1.10925	1.04453e-38	9.64193e-38
cholangiocyte	GNG7	13.1813	2.34535	1.87484e-38	1.71953e-37
cholangiocyte	HOOK1	13.1694	1.33064	1.61144e-38	1.48228e-37
cholangiocyte	LMTK3	13.1693	5.12713	3.52008e-38	3.20975e-37
cholangiocyte	DDOST	13.1664	1.0919	1.19942e-38	1.10588e-37
cholangiocyte	LINC01315	13.1607	4.47689	3.81266e-38	3.47452e-37
cholangiocyte	PTBP1	13.1602	1.11198	1.28585e-38	1.18486e-37
cholangiocyte	UBALD2	13.1578	1.90894	2.05316e-38	1.88198e-37
cholangiocyte	ZDHHC4	13.1434	1.2564	1.80693e-38	1.65918e-37
cholangiocyte	GRB14	13.1324	1.78673	3.31809e-38	3.03084e-37
cholangiocyte	SCRN1	13.1239	2.39862	3.26836e-38	2.98715e-37
cholangiocyte	ATF4	13.1237	0.740258	1.4997e-38	1.38031e-37
cholangiocyte	TOB2	13.1226	1.06591	1.64206e-38	1.50956e-37
cholangiocyte	RCAN1	13.1221	1.13502	2.6252e-38	2.40212e-37
cholangiocyte	N4BP2L2	13.1068	0.727779	1.80162e-38	1.65528e-37
cholangiocyte	DHX15	13.1046	1.27146	2.72579e-38	2.49272e-37
cholangiocyte	ABCA2	13.0972	2.67288	5.55285e-38	5.037e-37
cholangiocyte	BCL10	13.0907	1.95603	4.77804e-38	4.34169e-37
cholangiocyte	HBEGF	13.0844	2.39921	5.8744e-38	5.32253e-37
cholangiocyte	WIPI1	13.0817	1.82461	4.77557e-38	4.34169e-37
cholangiocyte	ATP2C1	13.0681	1.72755	5.33786e-38	4.84478e-37
cholangiocyte	PPP3CA	13.0657	1.41409	5.75968e-38	5.2216e-37
cholangiocyte	RNF207	13.0622	2.36308	7.71757e-38	6.96843e-37
cholangiocyte	STX7	13.058	1.40954	5.19815e-38	4.7207e-37
cholangiocyte	YWHAH	13.0553	0.917739	3.51123e-38	3.20353e-37
cholangiocyte	CACUL1	13.0329	1.33075	6.94204e-38	6.28263e-37
cholangiocyte	TGFBR2	13.0323	1.20664	7.07958e-38	6.40341e-37
cholangiocyte	PFDN5	13.0166	0.468388	4.38672e-38	3.99304e-37
cholangiocyte	PRR13	13.0144	0.886208	7.09055e-38	6.40964e-37
cholangiocyte	DEGS2	13.0115	5.6771	2.57144e-37	2.30725e-36
cholangiocyte	LINC01106	13.0028	4.17947	2.48103e-37	2.2274e-36
cholangiocyte	CCT4	12.9839	0.936425	9.81244e-38	8.84978e-37
cholangiocyte	ATP11A	12.9764	2.41097	2.57911e-37	2.31281e-36
cholangiocyte	LITAF	12.9722	0.834641	1.00467e-37	9.05584e-37
cholangiocyte	CFL1	12.9549	0.58779	9.12598e-38	8.23539e-37
cholangiocyte	UBD	12.9388	5.2381	6.21257e-37	5.52068e-36
cholangiocyte	ARHGAP18	12.9323	2.23589	3.87953e-37	3.46314e-36
cholangiocyte	CHMP3	12.9249	1.05152	2.06435e-37	1.85543e-36
cholangiocyte	ENDOD1	12.9247	1.76942	3.04205e-37	2.72484e-36
cholangiocyte	ZDHHC6	12.923	1.60142	3.44708e-37	3.08236e-36
cholangiocyte	GPRIN2	12.9197	6.51039	8.16345e-37	7.23792e-36
cholangiocyte	ZSWIM6	12.909	1.98096	4.64386e-37	4.13838e-36
cholangiocyte	TP53INP1	12.8989	1.02245	3.64427e-37	3.25683e-36
cholangiocyte	SYNGR2	12.8778	1.1195	4.01262e-37	3.57992e-36
cholangiocyte	KLHL36	12.875	1.64157	6.17679e-37	5.4951e-36
cholangiocyte	EIF3F	12.8698	0.699406	3.4172e-37	3.05738e-36
cholangiocyte	ZNF189	12.8462	2.05134	1.03008e-36	9.1124e-36
cholangiocyte	ATP6V0E1	12.8314	0.659827	5.67564e-37	5.05212e-36
cholangiocyte	PDZD8	12.8276	1.36582	1.02053e-36	9.03807e-36
cholangiocyte	RPS16	12.8252	0.316741	4.64043e-37	4.13767e-36
cholangiocyte	LRRC42	12.8201	1.66784	1.13312e-36	1.00127e-35
cholangiocyte	KLC3	12.8143	5.01986	2.59267e-36	2.2807e-35
cholangiocyte	TMCO1	12.7916	0.772787	1.06319e-36	9.39998e-36
cholangiocyte	BAZ2B	12.7887	1.31905	1.45575e-36	1.28491e-35
cholangiocyte	VAMP2	12.785	0.732584	8.96154e-37	7.94105e-36
cholangiocyte	MSI2	12.7827	1.42164	1.53025e-36	1.3499e-35
cholangiocyte	ARHGEF16	12.779	4.73046	4.01618e-36	3.50741e-35
cholangiocyte	PRPF40A	12.765	1.0474	1.66805e-36	1.46981e-35
cholangiocyte	SMAD2	12.7602	1.53931	2.22347e-36	1.95702e-35
cholangiocyte	LYPD6B	12.7466	6.12701	6.44615e-36	5.60152e-35
cholangiocyte	DYNC1I2	12.7441	0.871246	1.726e-36	1.52002e-35
cholangiocyte	VPS41	12.7404	1.68857	3.11909e-36	2.7346e-35
cholangiocyte	SGMS2	12.7398	1.70217	3.63499e-36	3.17981e-35

## Sheet: S5_Top1000_markers_Hep_Tissue
Supplementary Dataset 3_S5: Top1000 Marker gene list of Hepatocytes in human Tissue related to Fig. 4 and Extended Data Fig. 8
group	names	scores	logfoldchanges	pvals	pvals_adj
hepatocyte	APOC3	291.317	8.80141	0	0
hepatocyte	APOA2	272.005	8.71111	0	0
hepatocyte	APOC1	259.654	8.13317	0	0
hepatocyte	TTR	244.844	8.05021	0	0
hepatocyte	AHSG	243.054	7.90409	0	0
hepatocyte	FGB	242.981	8.14451	0	0
hepatocyte	APOA1	220.924	8.20245	0	0
hepatocyte	HP	209.493	8.24698	0	0
hepatocyte	ALDOB	208.819	7.45179	0	0
hepatocyte	ORM1	204.847	8.30143	0	0
hepatocyte	ORM2	198.428	8.11944	0	0
hepatocyte	FABP1	189.666	7.64993	0	0
hepatocyte	AGXT	185.138	7.66117	0	0
hepatocyte	ADH1B	177.61	6.18617	0	0
hepatocyte	HSD17B6	160.455	7.0906	0	0
hepatocyte	APOH	158.362	6.21079	0	0
hepatocyte	HPD	154.015	6.586	0	0
hepatocyte	MT1G	153.587	6.92356	0	0
hepatocyte	HRG	151.912	7.21768	0	0
hepatocyte	HPX	149.817	7.91485	0	0
hepatocyte	FGA	142.752	5.79377	0	0
hepatocyte	FGG	142.089	5.3555	0	0
hepatocyte	ADH4	141.629	7.19757	0	0
hepatocyte	KNG1	140.008	5.74147	0	0
hepatocyte	RBP4	139.889	5.47641	0	0
hepatocyte	APOE	139.538	5.67978	0	0
hepatocyte	GSTA1	139.33	7.01374	0	0
hepatocyte	TF	135.898	6.34123	0	0
hepatocyte	CYP2C9	135.258	7.40412	0	0
hepatocyte	MGST1	134.311	4.61277	0	0
hepatocyte	ASGR1	129.932	6.17925	0	0
hepatocyte	HMGCS2	128.777	7.04487	0	0
hepatocyte	DCXR	123.283	4.98776	0	0
hepatocyte	AZGP1	121.907	4.67611	0	0
hepatocyte	SERPINC1	121.103	7.55574	0	0
hepatocyte	ANG	119.692	4.80638	0	0
hepatocyte	MAT1A	118.769	7.68817	0	0
hepatocyte	PLG	117.708	7.4937	0	0
hepatocyte	CP	116.874	7.42214	0	0
hepatocyte	ANGPTL3	116.159	6.81898	0	0
hepatocyte	CYP2E1	114.933	7.79717	0	0
hepatocyte	CES1	114.383	5.98546	0	0
hepatocyte	TMEM176A	112.792	4.60119	0	0
hepatocyte	MT1X	109.94	4.76067	0	0
hepatocyte	IGFBP1	109.609	5.67518	0	0
hepatocyte	APOC2	107.299	7.28317	0	0
hepatocyte	ALB	105.237	5.55163	0	0
hepatocyte	APOM	105.036	6.19156	0	0
hepatocyte	CPS1	104.134	6.86417	0	0
hepatocyte	CYP2C8	102.684	5.93693	0	0
hepatocyte	SLC22A1	101.7	6.28328	0	0
hepatocyte	PRAP1	101.201	6.96696	0	0
hepatocyte	TAT	100.357	7.14947	0	0
hepatocyte	CFHR1	100.306	7.02668	0	0
hepatocyte	TTC36	99.7189	6.93121	0	0
hepatocyte	TMEM176B	99.1165	3.96928	0	0
hepatocyte	ATF5	98.9586	5.68835	0	0
hepatocyte	SERPINA1	97.621	4.20424	0	0
hepatocyte	PCK1	97.4504	6.93156	0	0
hepatocyte	LEAP2	96.4105	4.95537	0	0
hepatocyte	CYB5A	96.2708	3.43306	0	0
hepatocyte	FGL1	95.5014	4.79658	0	0
hepatocyte	MASP2	95.4468	7.30513	0	0
hepatocyte	AMBP	94.6251	4.35811	0	0
hepatocyte	SERPINF2	94.2634	6.52103	0	0
hepatocyte	A1BG	94.1488	5.42726	0	0
hepatocyte	GATM	92.7796	3.4349	0	0
hepatocyte	ACSL1	91.5542	5.77978	0	0
hepatocyte	APOB	91.437	4.61256	0	0
hepatocyte	FTL	91.2831	2.23675	0	0
hepatocyte	APOA5	90.7517	7.47765	0	0
hepatocyte	C4BPA	90.644	6.49351	0	0
hepatocyte	C4BPB	89.8867	5.66394	0	0
hepatocyte	ITIH1	89.5933	6.405	0	0
hepatocyte	SAA4	89.3174	6.90066	0	0
hepatocyte	C8G	89.0348	7.19628	0	0
hepatocyte	ARG1	88.1492	6.56482	0	0
hepatocyte	ASS1	88.0012	4.80973	0	0
hepatocyte	RBP5	84.5115	6.44156	0	0
hepatocyte	CYP2B6	84.2947	7.36606	0	0
hepatocyte	APCS	83.4886	4.03182	0	0
hepatocyte	SULT2A1	83.3427	7.0076	0	0
hepatocyte	FUOM	82.2351	4.98432	0	0
hepatocyte	SORD	81.7825	5.55343	0	0
hepatocyte	NNMT	81.1935	4.79991	0	0
hepatocyte	FN1	80.876	4.32876	0	0
hepatocyte	ACSM2B	79.9773	6.2104	0	0
hepatocyte	PON1	79.4906	5.77415	0	0
hepatocyte	UGT2B7	78.9882	7.07606	0	0
hepatocyte	GAMT	78.6449	3.30993	0	0
hepatocyte	ADH1A	78.604	6.12381	0	0
hepatocyte	MT2A	77.1189	3.30994	0	0
hepatocyte	CYP4A11	76.2235	6.51526	0	0
hepatocyte	ECHS1	76.1711	3.14612	0	0
hepatocyte	SOD1	75.7236	2.42021	0	0
hepatocyte	RARRES2	74.7676	2.53013	0	0
hepatocyte	TDO2	74.6941	4.88288	0	0
hepatocyte	HSD17B13	74.4007	6.87308	0	0
hepatocyte	BAAT	74.1995	4.12035	0	0
hepatocyte	SPP2	74.1532	6.47714	0	0
hepatocyte	FXYD1	73.586	3.07765	0	0
hepatocyte	C1S	73.4356	3.5171	0	0
hepatocyte	ACSM2A	73.2732	6.51445	0	0
hepatocyte	UGT2B4	72.1294	7.38612	0	0
hepatocyte	ALDH2	71.6366	2.97065	0	0
hepatocyte	GCHFR	71.4484	4.81204	0	0
hepatocyte	CYP4F3	70.991	6.63835	0	0
hepatocyte	PON3	70.72	5.3554	0	0
hepatocyte	PXMP2	70.664	3.28788	0	0
hepatocyte	SLC2A2	70.5727	3.27569	0	0
hepatocyte	CFH	70.4265	3.77293	0	0
hepatocyte	CYP3A4	70.1079	7.5167	0	0
hepatocyte	MT1H	69.6757	6.6202	0	0
hepatocyte	BHMT	69.6336	6.82803	0	0
hepatocyte	DDT	68.8739	2.47841	0	0
hepatocyte	LINC00844	68.6454	6.33128	0	0
hepatocyte	KHK	67.8565	4.64564	0	0
hepatocyte	C8B	67.4958	5.74691	0	0
hepatocyte	LECT2	67.2549	7.14284	0	0
hepatocyte	VTN	66.4417	3.09148	0	0
hepatocyte	MT1E	66.2511	2.53273	0	0
hepatocyte	GNMT	65.7605	5.93669	0	0
hepatocyte	RDH16	65.5032	7.07972	0	0
hepatocyte	INSIG1	65.0131	3.95493	0	0
hepatocyte	ACADSB	64.5663	4.76208	0	0
hepatocyte	SLC27A5	64.032	4.58748	0	0
hepatocyte	GLYAT	63.5621	6.67206	0	0
hepatocyte	IGF2	63.5462	4.05611	0	0
hepatocyte	CYP27A1	63.5247	4.64187	0	0
hepatocyte	ACAA1	62.9908	3.24158	0	0
hepatocyte	AADAC	62.0104	3.43955	0	0
hepatocyte	FBP1	61.9079	4.10011	0	0
hepatocyte	AFM	61.5821	6.73034	0	0
hepatocyte	AOX1	61.5617	6.59729	0	0
hepatocyte	DPYS	61.206	4.49745	0	0
hepatocyte	ITIH3	60.978	4.95399	0	0
hepatocyte	HAO1	60.854	6.67587	0	0
hepatocyte	AKR1C4	60.8032	6.26661	0	0
hepatocyte	GRHPR	60.4814	2.7321	0	0
hepatocyte	ADH6	60.3342	5.41139	0	0
hepatocyte	IGF1	60.2931	5.22921	0	0
hepatocyte	TFR2	59.9675	5.66753	0	0
hepatocyte	LRG1	59.7605	4.23582	0	0
hepatocyte	AQP9	59.7209	6.49395	0	0
hepatocyte	TMBIM6	59.6079	1.95674	0	0
hepatocyte	ETFB	58.6722	2.51347	0	0
hepatocyte	SERPINA11	58.5697	6.63524	0	0
hepatocyte	SERPIND1	58.3052	5.8727	0	0
hepatocyte	CYP8B1	58.2902	7.00682	0	0
hepatocyte	PHYH	58.165	3.07858	0	0
hepatocyte	PAH	57.9732	2.63063	0	0
hepatocyte	UGT2B10	57.9678	6.74401	0	0
hepatocyte	CDO1	57.6898	5.2532	0	0
hepatocyte	CPB2	57.3102	2.48298	0	0
hepatocyte	ASGR2	56.6811	2.70132	0	0
hepatocyte	HAAO	56.5851	3.86951	0	0
hepatocyte	C8A	56.3673	6.67411	0	0
hepatocyte	SLC38A4	56.313	5.62139	0	0
hepatocyte	CFHR3	56.1779	6.72412	0	0
hepatocyte	SERPINF1	56.1606	3.37981	0	0
hepatocyte	MTTP	55.845	7.21959	0	0
hepatocyte	FMO3	55.7562	4.66875	0	0
hepatocyte	ADI1	55.5144	2.21388	0	0
hepatocyte	SLC39A14	55.4693	3.78841	0	0
hepatocyte	LCAT	55.392	4.72369	0	0
hepatocyte	CD14	55.347	3.86533	0	0
hepatocyte	BCHE	55.0709	6.12194	0	0
hepatocyte	GSTA2	54.671	5.96805	0	0
hepatocyte	PGLYRP2	54.5951	6.50082	0	0
hepatocyte	SAA1	53.1497	6.0926	0	0
hepatocyte	QPRT	53.0348	4.23588	0	0
hepatocyte	CHCHD10	52.6068	2.04202	0	0
hepatocyte	C5	52.4899	4.2242	0	0
hepatocyte	PROC	52.1764	3.26273	0	0
hepatocyte	APOF	52.1279	6.6845	0	0
hepatocyte	SMIM14	52.0467	2.67265	0	0
hepatocyte	HAO2	51.7581	6.69419	0	0
hepatocyte	PCK2	51.5404	4.58604	0	0
hepatocyte	HSD11B1	51.5016	3.98637	0	0
hepatocyte	ALDH1L1	51.4829	4.68576	0	0
hepatocyte	ASPDH	51.4688	6.61085	0	0
hepatocyte	ALDH6A1	51.3371	2.95037	0	0
hepatocyte	CIDEB	51.2667	5.50081	0	0
hepatocyte	ACAT1	51.214	2.58124	0	0
hepatocyte	HPN	51.1515	3.41138	0	0
hepatocyte	UQCRQ	50.8119	1.51007	0	0
hepatocyte	CES2	50.6023	3.75732	0	0
hepatocyte	PBLD	50.0811	5.00994	0	0
hepatocyte	GHR	50.0309	5.61241	0	0
hepatocyte	PEBP1	50.0136	1.57714	0	0
hepatocyte	GC	49.7441	2.49415	0	0
hepatocyte	AR	49.6319	4.10565	0	0
hepatocyte	PLIN2	49.5225	3.40388	0	0
hepatocyte	NTHL1	49.2562	3.09515	0	0
hepatocyte	ATOX1	48.9314	2.02092	0	0
hepatocyte	A1CF	48.8482	2.41701	0	0
hepatocyte	GADD45G	48.7124	3.75907	0	0
hepatocyte	SMLR1	48.6088	5.44793	0	0
hepatocyte	RGN	48.5812	3.58578	0	0
hepatocyte	MT1F	48.3873	3.00583	0	0
hepatocyte	TM4SF5	48.3688	4.68325	0	0
hepatocyte	GSTZ1	47.9655	4.08161	0	0
hepatocyte	CAT	47.9416	2.29757	0	0
hepatocyte	LINC01485	47.5063	6.49445	3.63869e-307	1.34196e-305
hepatocyte	SLC13A5	47.1913	6.10457	9.89731e-306	3.6162e-304
hepatocyte	UGP2	46.9956	1.97217	0	0
hepatocyte	ACAA2	46.9274	2.24838	0	0
hepatocyte	GLYATL1	46.715	5.18552	2.56084e-304	9.31329e-303
hepatocyte	SLC25A47	46.6675	6.58651	8.24518e-300	2.9508e-298
hepatocyte	EPHX1	46.5081	2.16836	0	0
hepatocyte	PCBD1	46.157	2.11583	0	0
hepatocyte	HPR	46.1149	6.41021	1.53748e-295	5.37982e-294
hepatocyte	BHMT2	45.9356	5.19435	3.27794e-299	1.17045e-297
hepatocyte	AKR7A3	45.6843	4.21799	3.12998e-302	1.13568e-300
hepatocyte	SLC27A2	45.4965	7.10994	8.22121e-289	2.82016e-287
hepatocyte	QDPR	45.2778	2.65171	0	0
hepatocyte	HGD	45.2389	2.98758	0	0
hepatocyte	SLCO1B1	45.2025	6.78622	1.53054e-286	5.1936e-285
hepatocyte	EHHADH	45.1993	4.93385	3.60669e-293	1.25642e-291
hepatocyte	SLC22A7	45.1636	6.85343	2.3815e-286	8.06373e-285
hepatocyte	LBP	44.8477	6.63451	5.17716e-284	1.72693e-282
hepatocyte	TMEM220	44.7961	3.27048	1.28372e-306	4.71226e-305
hepatocyte	ACSM5	44.6382	5.67854	3.02125e-284	1.01209e-282
hepatocyte	HGFAC	44.5578	6.85858	2.99317e-281	9.83801e-280
hepatocyte	SCP2	44.4625	1.87198	0	0
hepatocyte	MT-ND4L	44.364	2.00415	0	0
hepatocyte	SERPINA7	44.3233	6.70905	5.09838e-279	1.66876e-277
hepatocyte	DBI	44.28	1.59301	0	0
hepatocyte	PRG4	44.1433	6.34324	1.04532e-278	3.41436e-277
hepatocyte	C1R	44.0047	2.33085	0	0
hepatocyte	KLKB1	43.9787	5.00772	1.59525e-281	5.2543e-280
hepatocyte	PIPOX	43.9354	5.93809	1.39014e-277	4.52183e-276
hepatocyte	ST6GAL1	43.8381	3.02857	7.06228e-302	2.55658e-300
hepatocyte	PRDX6	43.4412	1.68842	0	0
hepatocyte	PSAT1	43.4389	6.21458	2.12758e-272	6.82171e-271
hepatocyte	PTP4A1	43.4248	1.91142	0	0
hepatocyte	CD302	43.3861	2.71904	4.02042e-307	1.47927e-305
hepatocyte	EBP	43.1353	2.69852	2.55896e-300	9.17895e-299
hepatocyte	VNN1	42.9454	5.60922	3.53324e-270	1.11467e-268
hepatocyte	PTGR1	42.7855	2.33577	1.29919e-306	4.75794e-305
hepatocyte	GLUD1	42.6997	2.41651	3.41258e-305	1.24397e-303
hepatocyte	FTCD	42.6101	2.21681	0	0
hepatocyte	RCL1	42.4742	4.00962	6.18082e-273	1.9899e-271
hepatocyte	HPGD	42.4277	5.63981	7.37676e-265	2.28142e-263
hepatocyte	CYP2D6	42.2936	6.27014	1.92526e-262	5.88478e-261
hepatocyte	PROX1	42.2638	2.61608	3.84483e-296	1.35137e-294
hepatocyte	PGRMC1	42.144	1.87519	0	0
hepatocyte	FAH	41.7995	3.48343	1.28628e-272	4.13266e-271
hepatocyte	PEMT	41.7294	3.28725	1.41598e-275	4.59638e-274
hepatocyte	TSKU	41.7061	5.08456	1.52924e-260	4.65618e-259
hepatocyte	SLC10A1	41.3488	6.19941	2.01339e-254	5.97965e-253
hepatocyte	HINT1	41.0873	1.26042	0	0
hepatocyte	PRODH2	41.0758	6.56922	2.75566e-251	8.04725e-250
hepatocyte	ALDH1A1	40.7382	1.91829	1.44889e-300	5.20903e-299
hepatocyte	VKORC1	40.6357	1.70112	1.78234e-301	6.43733e-300
hepatocyte	SDC2	40.6291	2.23022	8.63922e-288	2.94427e-286
hepatocyte	PPP1R1A	40.6194	3.44566	6.93334e-263	2.12753e-261
hepatocyte	FETUB	40.1719	6.87668	3.30896e-243	9.26686e-242
hepatocyte	AKR1D1	40.157	6.39886	1.12642e-243	3.16586e-242
hepatocyte	GPT2	40.0023	4.71056	1.24411e-247	3.59306e-246
hepatocyte	A2M	39.9999	2.60671	9.29103e-271	2.95489e-269
hepatocyte	MGST2	39.9693	1.87049	7.01295e-288	2.39523e-286
hepatocyte	GGH	39.8226	3.30175	2.85454e-255	8.51001e-254
hepatocyte	DHCR24	39.6659	2.9315	6.10049e-258	1.83963e-256
hepatocyte	BNIP3	39.4531	2.09989	1.00773e-274	3.26442e-273
hepatocyte	PGM1	39.3681	2.91726	7.06296e-256	2.11364e-254
hepatocyte	SCD	39.3132	5.1119	8.99766e-239	2.4542e-237
hepatocyte	UPB1	39.1948	5.09844	2.59905e-239	7.1263e-238
hepatocyte	ALAS1	39.1793	3.45393	1.77109e-246	5.06841e-245
hepatocyte	ZG16	39.1675	6.51055	8.87372e-235	2.35101e-233
hepatocyte	CFI	39.1047	2.6414	2.54856e-257	7.67059e-256
hepatocyte	ENTPD5	39.0698	3.99917	4.17829e-242	1.16392e-240
hepatocyte	ACOX1	38.9342	2.8462	2.05961e-253	6.0939e-252
hepatocyte	ZNHIT1	38.9065	1.64824	8.38841e-281	2.75136e-279
hepatocyte	SDS	38.8297	5.94387	1.72333e-232	4.51255e-231
hepatocyte	SERPINA6	38.8	2.09239	1.75543e-270	5.56039e-269
hepatocyte	ITIH2	38.6616	2.1729	8.7152e-272	2.77737e-270
hepatocyte	ABAT	38.5576	4.64525	7.57282e-234	1.99291e-232
hepatocyte	SERPINA10	38.5268	5.60946	1.36662e-230	3.55479e-229
hepatocyte	CYP4F2	38.3099	5.88333	2.3897e-228	6.14479e-227
hepatocyte	LINC00261	38.2894	2.55144	1.60644e-251	4.70873e-250
hepatocyte	SLC7A2	38.2606	2.82549	3.824e-247	1.10237e-245
hepatocyte	IGFBP2	37.9506	3.43372	5.74325e-240	1.58025e-238
hepatocyte	GLYCTK	37.8196	3.72962	8.45326e-232	2.2098e-230
hepatocyte	ELL2	37.7904	3.23749	1.72007e-236	4.62739e-235
hepatocyte	ACADM	37.7246	2.23189	1.20205e-249	3.49731e-248
hepatocyte	DGAT2	37.6575	6.53293	1.01901e-221	2.55746e-220
hepatocyte	NADK2	37.5771	3.26531	4.47046e-234	1.17845e-232
hepatocyte	ACOT13	37.5506	2.76943	1.72832e-239	4.74715e-238
hepatocyte	LMAN1	37.398	1.98467	2.02041e-251	5.9111e-250
hepatocyte	IDH1	37.3833	2.70689	3.24033e-239	8.85371e-238
hepatocyte	MRPL41	37.0906	1.75667	1.53963e-252	4.52133e-251
hepatocyte	GCSH	36.9578	2.04073	7.17395e-245	2.03816e-243
hepatocyte	LEPR	36.7622	4.75643	5.24294e-217	1.28706e-215
hepatocyte	MAN1A1	36.4963	2.97602	4.73331e-225	1.20527e-223
hepatocyte	IL1RAP	36.3331	2.71195	7.31635e-227	1.87516e-225
hepatocyte	MST1	36.2623	3.15768	2.38855e-221	5.97555e-220
hepatocyte	CXCL2	36.2049	2.24881	1.16266e-242	3.25028e-241
hepatocyte	MT1M	36.0554	2.21689	7.36484e-238	1.99498e-236
hepatocyte	MPST	36.0456	1.65048	1.60107e-246	4.59021e-245
hepatocyte	CRYL1	35.973	2.78477	1.90197e-222	4.79643e-221
hepatocyte	AIG1	35.8102	1.94497	3.6607e-234	9.68237e-233
hepatocyte	HINT2	35.5362	1.72383	1.0784e-235	2.88633e-234
hepatocyte	PTMS	35.4729	1.45076	1.50273e-243	4.21598e-242
hepatocyte	MGMT	35.4616	1.85599	8.49213e-231	2.2126e-229
hepatocyte	EPHX2	35.4278	3.01581	1.40746e-214	3.4283e-213
hepatocyte	TMEM256	34.8363	1.6233	2.70306e-229	6.99635e-228
hepatocyte	CYP4A22	34.7636	6.17157	3.70905e-197	8.17291e-196
hepatocyte	PROS1	34.7086	2.71123	5.19292e-211	1.23056e-209
hepatocyte	NR1I3	34.3963	5.01195	1.69079e-196	3.71006e-195
hepatocyte	PLGLB1	34.2819	4.9067	6.384e-195	1.39304e-193
hepatocyte	POR	34.2739	2.14553	1.49971e-212	3.60274e-211
hepatocyte	SLC39A5	34.1459	4.55441	4.88471e-195	1.06737e-193
hepatocyte	ISOC2	33.9978	2.17864	2.31243e-209	5.39831e-208
hepatocyte	SLC25A13	33.8992	3.23357	6.69485e-198	1.48984e-196
hepatocyte	SORL1	33.8596	2.99967	1.58973e-199	3.55786e-198
hepatocyte	LIPC	33.8065	4.39399	1.85819e-191	3.96658e-190
hepatocyte	CRP	33.7979	4.79498	1.43835e-190	3.04555e-189
hepatocyte	STARD10	33.757	1.98844	1.24255e-210	2.9268e-209
hepatocyte	PANK1	33.6393	3.94531	1.40404e-192	3.03423e-191
hepatocyte	KIF22	33.5535	2.24825	3.99125e-205	9.1276e-204
hepatocyte	DHODH	33.5019	3.36015	2.02345e-193	4.39701e-192
hepatocyte	CPN2	33.2901	6.41712	2.16991e-184	4.416e-183
hepatocyte	SULT1A1	33.2597	2.25778	6.55041e-200	1.4681e-198
hepatocyte	ERRFI1	33.039	1.62496	1.84679e-214	4.48454e-213
hepatocyte	SAT1	33.013	1.35061	4.33337e-217	1.06711e-215
hepatocyte	SLCO2B1	32.9121	5.87097	1.44011e-181	2.86762e-180
hepatocyte	ANXA10	32.8159	4.86275	3.74676e-182	7.48923e-181
hepatocyte	HAMP	32.6448	5.75244	4.1e-179	8.06196e-178
hepatocyte	AMN	32.6398	3.6684	1.13672e-183	2.30143e-182
hepatocyte	GPT	32.6165	4.8187	1.30468e-180	2.58158e-179
hepatocyte	SHMT1	32.6151	2.60609	1.41169e-190	2.99312e-189
hepatocyte	CFB	32.6018	3.82672	5.89329e-183	1.17948e-181
hepatocyte	MLXIPL	32.5905	2.51914	3.81015e-191	8.10031e-190
hepatocyte	ASL	32.2651	2.13409	8.00899e-192	1.72133e-190
hepatocyte	GOLT1A	32.2291	2.70509	4.3341e-186	8.91271e-185
hepatocyte	IGFALS	32.0782	3.12545	3.05154e-181	6.05338e-180
hepatocyte	SERPING1	32.0427	1.18062	2.67423e-204	6.09795e-203
hepatocyte	MTHFD1	31.9532	2.68963	1.40947e-183	2.84265e-182
hepatocyte	SAR1B	31.9259	2.15391	2.05169e-188	4.26378e-187
hepatocyte	GJB1	31.9067	2.09691	2.42992e-189	5.08341e-188
hepatocyte	GSTO1	31.8642	1.48655	3.62339e-195	7.92855e-194
hepatocyte	SIGIRR	31.8339	1.8735	9.2167e-190	1.94367e-188
hepatocyte	HAGH	31.8057	1.9097	1.63101e-189	3.4212e-188
hepatocyte	TST	31.7958	2.0697	3.33618e-188	6.924e-187
hepatocyte	SOD2	31.7372	1.8569	6.362e-192	1.36922e-190
hepatocyte	GPX4	31.6958	1.23884	1.89708e-197	4.2157e-196
hepatocyte	AK4	31.6925	2.75962	7.80625e-181	1.54658e-179
hepatocyte	CDHR5	31.6672	6.07887	5.83265e-171	1.09613e-169
hepatocyte	ABHD2	31.5497	2.07218	4.94895e-185	1.00978e-183
hepatocyte	CMBL	31.5255	2.52581	2.62523e-180	5.18804e-179
hepatocyte	FMO5	31.4538	2.18438	3.99603e-184	8.11133e-183
hepatocyte	ECHDC2	31.2655	1.49604	1.65125e-190	3.49163e-189
hepatocyte	DHTKD1	31.2321	2.60532	1.64503e-177	3.19865e-176
hepatocyte	GPD1	31.2131	5.61612	1.57307e-167	2.88048e-166
hepatocyte	MPC2	31.1864	1.36364	1.54368e-192	3.33143e-191
hepatocyte	OCIAD2	31.1715	1.66778	2.03571e-187	4.21383e-186
hepatocyte	ACMSD	31.0231	4.82	1.23041e-166	2.23221e-165
hepatocyte	MT-ND5	30.9163	1.34719	2.16138e-181	4.29298e-180
hepatocyte	TFPI	30.6908	1.54432	1.20029e-183	2.427e-182
hepatocyte	PLPP3	30.6414	2.2275	1.51347e-174	2.89978e-173
hepatocyte	CYP4V2	30.4311	2.54782	8.74199e-170	1.63118e-168
hepatocyte	UGT2B15	30.3902	1.99448	6.77973e-179	1.32979e-177
hepatocyte	GLTPD2	30.3892	6.76283	8.10911e-160	1.40776e-158
hepatocyte	EVA1A	30.292	4.98469	3.22061e-160	5.61587e-159
hepatocyte	HLF	30.109	3.8817	9.5336e-161	1.67168e-159
hepatocyte	MBL2	30.0726	7.26805	5.5573e-157	9.4697e-156
hepatocyte	CFHR5	29.9594	6.92354	3.80681e-156	6.43798e-155
hepatocyte	ALDH8A1	29.9363	3.91835	1.65272e-159	2.85653e-158
hepatocyte	SAA2	29.9202	5.24706	1.56996e-156	2.66656e-155
hepatocyte	ATF7IP2	29.8672	3.05295	5.38764e-162	9.53212e-161
hepatocyte	AMDHD1	29.8266	5.19149	5.26804e-156	8.89958e-155
hepatocyte	OTC	29.8216	6.0993	2.62916e-155	4.42257e-154
hepatocyte	CYP3A5	29.7835	1.68844	2.00157e-173	3.82097e-172
hepatocyte	ENPP1	29.7545	3.91219	2.26893e-158	3.88736e-157
hepatocyte	MSMO1	29.7481	2.26582	2.12221e-165	3.82802e-164
hepatocyte	XBP1	29.6313	1.42024	3.31881e-172	6.28216e-171
hepatocyte	CLU	29.5976	1.2412	4.41623e-179	8.67293e-178
hepatocyte	DECR1	29.583	1.7915	3.11483e-166	5.63791e-165
hepatocyte	ENO3	29.5552	4.91991	4.95128e-154	8.20565e-153
hepatocyte	AGT	29.5485	1.32185	9.26573e-178	1.80613e-176
hepatocyte	GALK1	29.4604	2.62784	1.49317e-159	2.58932e-158
hepatocyte	SPRYD4	29.1138	2.74102	5.77045e-156	9.73786e-155
hepatocyte	SRD5A1	29.0949	3.52835	6.44252e-153	1.0621e-151
hepatocyte	BLVRB	28.9618	1.41378	6.59928e-165	1.18493e-163
hepatocyte	ETS2	28.9388	1.83515	2.08436e-161	3.67124e-160
hepatocyte	CFHR4	28.8209	6.99938	8.71351e-147	1.38281e-145
hepatocyte	PCSK6	28.7641	4.44352	6.19969e-148	9.89871e-147
hepatocyte	BDH1	28.7033	4.09399	2.99125e-148	4.79057e-147
hepatocyte	ACOX2	28.6993	3.7458	2.4366e-149	3.94653e-148
hepatocyte	SLC30A1	28.6396	3.1226	1.10584e-150	1.80415e-149
hepatocyte	LAMTOR2	28.626	1.51408	7.31842e-161	1.28469e-159
hepatocyte	ALDH5A1	28.5881	3.60987	1.40125e-148	2.25334e-147
hepatocyte	AK3	28.4472	1.73578	1.81962e-157	3.11417e-156
hepatocyte	SULT1A2	28.2769	3.82618	3.03129e-145	4.76723e-144
hepatocyte	GCH1	28.2707	4.53493	4.99191e-144	7.77283e-143
hepatocyte	LPIN2	28.1581	1.75835	3.38483e-154	5.62147e-153
hepatocyte	THOP1	28.1558	3.26657	8.00562e-146	1.26155e-144
hepatocyte	CHPT1	28.1412	2.08264	4.66589e-151	7.63602e-150
hepatocyte	EPB41L4B	28.1354	3.51813	1.35116e-144	2.11435e-143
hepatocyte	GYS2	28.0532	6.86579	1.80245e-140	2.73079e-139
hepatocyte	CDA	28.0456	4.71592	8.01059e-142	1.22307e-140
hepatocyte	GOT2	28.0252	2.5576	6.92452e-147	1.10001e-145
hepatocyte	GCGR	28.0217	6.12786	1.30943e-140	1.9896e-139
hepatocyte	SAT2	27.9351	1.2711	2.91059e-157	4.97047e-156
hepatocyte	CREB3L3	27.7613	5.7401	1.50776e-138	2.269e-137
hepatocyte	UQCR11	27.7256	0.927399	2.51133e-157	4.29331e-156
hepatocyte	ECI2	27.6656	1.72701	8.53167e-149	1.37337e-147
hepatocyte	SEC14L2	27.6145	3.45783	1.36105e-140	2.06604e-139
hepatocyte	HSD17B10	27.5067	1.48972	3.35872e-149	5.42332e-148
hepatocyte	SUCLG2	27.4986	1.71731	1.98651e-147	3.16853e-146
hepatocyte	HMGCL	27.4023	2.03748	8.23754e-145	1.29162e-143
hepatocyte	SC5D	27.3903	2.35793	8.19772e-143	1.26145e-141
hepatocyte	ABCA6	27.3231	3.47695	2.49208e-138	3.74671e-137
hepatocyte	MYO1B	27.214	1.51789	9.66494e-147	1.5307e-145
hepatocyte	HADH	27.1806	1.88711	1.7474e-143	2.71011e-142
hepatocyte	HSPE1	27.0725	1.10728	2.95467e-149	4.7758e-148
hepatocyte	FST	26.9571	4.74715	8.90654e-133	1.28731e-131
hepatocyte	AGMO	26.7704	3.27062	1.4041e-133	2.03812e-132
hepatocyte	IQGAP2	26.7622	1.65042	7.39174e-142	1.12969e-140
hepatocyte	ST3GAL6	26.762	4.85419	3.64503e-131	5.20609e-130
hepatocyte	TMEM45A	26.7294	2.74665	4.14147e-135	6.081e-134
hepatocyte	CYP2J2	26.6076	4.53262	4.59726e-130	6.51286e-129
hepatocyte	AGXT2	26.6018	6.20367	5.08907e-129	7.11971e-128
hepatocyte	PLA2G2A	26.5472	3.32734	1.8709e-131	2.68191e-130
hepatocyte	LINC01018	26.5099	5.90276	1.55218e-128	2.16383e-127
hepatocyte	TMEM205	26.5078	1.28524	1.17754e-141	1.79615e-140
hepatocyte	RTN4	26.5072	1.10759	5.66398e-143	8.7242e-142
hepatocyte	ETNK2	26.3679	3.5005	7.52247e-130	1.05996e-128
hepatocyte	REEP6	26.3355	1.90589	8.81928e-136	1.30593e-134
hepatocyte	FKBP2	26.3199	1.05008	5.13294e-142	7.85234e-141
hepatocyte	NAMPT	26.293	1.58523	1.23883e-136	1.84486e-135
hepatocyte	ALDH4A1	26.2192	2.57576	3.39383e-131	4.85173e-130
hepatocyte	SLC51A	26.2036	3.86346	6.56375e-128	9.12593e-127
hepatocyte	DMGDH	26.1773	5.09436	2.94393e-126	4.03949e-125
hepatocyte	ABCB4	26.1295	5.98656	2.40598e-125	3.26428e-124
hepatocyte	ASPG	26.1279	5.80328	2.16083e-125	2.93421e-124
hepatocyte	SDC1	26.0089	1.61929	1.53118e-134	2.2295e-133
hepatocyte	NPW	25.9746	5.28124	2.37104e-124	3.20029e-123
hepatocyte	ITPR2	25.9737	2.30577	4.73004e-130	6.69493e-129
hepatocyte	MFSD2A	25.959	5.80358	5.95521e-124	8.01047e-123
hepatocyte	DNAJC25	25.9512	2.92778	1.20102e-127	1.65956e-126
hepatocyte	OAF	25.9501	2.39949	1.25449e-129	1.75975e-128
hepatocyte	PLCXD2	25.95	2.64589	7.12254e-129	9.93803e-128
hepatocyte	STEAP3	25.9266	4.67644	1.09988e-124	1.4871e-123
hepatocyte	MSRB1	25.8808	2.23768	6.75461e-130	9.54332e-129
hepatocyte	PRDX3	25.7426	1.30421	1.06208e-133	1.5436e-132
hepatocyte	FOXO1	25.6343	2.62739	7.34801e-126	1.00387e-124
hepatocyte	MT-CO2	25.625	1.20001	1.17896e-124	1.59266e-123
hepatocyte	ABCA1	25.6142	2.71484	6.63398e-126	9.07106e-125
hepatocyte	PDIA4	25.6014	1.70631	1.51164e-129	2.1167e-128
hepatocyte	ALDH9A1	25.5948	1.67794	8.0448e-130	1.13254e-128
hepatocyte	DIO1	25.4346	4.59899	1.62316e-120	2.11631e-119
hepatocyte	PLGLB2	25.3924	6.05461	1.77852e-119	2.30168e-118
hepatocyte	NDUFB11	25.3856	1.04469	3.05523e-132	4.40778e-131
hepatocyte	CYP2C18	25.3791	3.89119	4.38473e-121	5.7503e-120
hepatocyte	MT-ATP6	25.3401	1.18017	6.65219e-124	8.9327e-123
hepatocyte	F13B	25.3358	6.0486	4.32254e-119	5.58482e-118
hepatocyte	LY6E	25.3295	1.32383	4.7909e-130	6.77497e-129
hepatocyte	UGT2B17	25.2213	4.90847	1.37043e-118	1.75619e-117
hepatocyte	GDA	25.2085	4.78567	1.03694e-118	1.33208e-117
hepatocyte	MT-ND4	25.1592	1.17577	3.06819e-121	4.03047e-120
hepatocyte	ACO1	25.1534	2.20547	3.79405e-123	5.05155e-122
hepatocyte	DNAJC12	25.0912	3.84382	9.3534e-119	1.20353e-117
hepatocyte	GPAM	25.0677	3.08664	8.92245e-120	1.15565e-118
hepatocyte	CNDP1	25.0508	5.0575	1.34257e-117	1.70518e-116
hepatocyte	DHRS4L2	25.0353	1.62397	4.9937e-125	6.76929e-124
hepatocyte	SLC35D1	24.9562	3.31295	8.07808e-119	1.04028e-117
hepatocyte	ZFAND5	24.9168	1.2945	4.19632e-126	5.74789e-125
hepatocyte	ABCG2	24.9157	5.09712	3.74925e-116	4.71236e-115
hepatocyte	MT1A	24.9119	1.70337	1.61704e-125	2.19959e-124
hepatocyte	CTSZ	24.878	1.60836	2.16974e-123	2.89625e-122
hepatocyte	HAL	24.8756	5.54399	1.46814e-115	1.84085e-114
hepatocyte	SELENBP1	24.8479	1.769	3.32008e-123	4.42425e-122
hepatocyte	ESPN	24.7699	2.68024	1.13902e-118	1.46082e-117
hepatocyte	AGL	24.7408	2.65565	2.49631e-118	3.19637e-117
hepatocyte	LDHD	24.7253	3.50035	2.94516e-116	3.70764e-115
hepatocyte	MTHFS	24.6866	1.85734	2.16969e-120	2.8242e-119
hepatocyte	SLCO1B3	24.6392	5.38034	6.47056e-114	8.00464e-113
hepatocyte	CPEB3	24.5605	4.06193	4.29192e-114	5.31366e-113
hepatocyte	GOT1	24.553	1.68812	3.07915e-120	4.00137e-119
hepatocyte	PRDX4	24.483	1.37022	8.94557e-121	1.16828e-119
hepatocyte	FAM162A	24.477	1.42313	7.38408e-121	9.65152e-120
hepatocyte	TKFC	24.4703	2.71064	1.02046e-115	1.28055e-114
hepatocyte	NUPR1	24.4299	1.23421	3.45285e-122	4.57015e-121
hepatocyte	SLC25A18	24.3723	4.2783	1.32678e-112	1.61339e-111
hepatocyte	TMEM82	24.3616	6.14191	1.76809e-111	2.13189e-110
hepatocyte	SMOC1	24.353	4.3059	2.59384e-112	3.14929e-111
hepatocyte	CYP1A2	24.3064	7.28089	7.50036e-111	8.98841e-110
hepatocyte	SCCPDH	24.0858	1.60975	3.52784e-116	4.43762e-115
hepatocyte	TMPRSS6	24.0667	5.54074	1.87328e-109	2.21953e-108
hepatocyte	ETNPPL	24.0144	5.80113	7.62959e-109	8.97891e-108
hepatocyte	SARDH	23.9958	3.91575	4.52436e-110	5.38502e-109
hepatocyte	SHMT2	23.9063	2.12772	5.76444e-113	7.06987e-112
hepatocyte	GCLC	23.8931	2.00433	2.71582e-113	3.34391e-112
hepatocyte	DAO	23.8817	6.25238	9.12052e-108	1.06458e-106
hepatocyte	CTH	23.8469	3.87771	7.61326e-109	8.96641e-108
hepatocyte	THRSP	23.7691	6.47666	7.42272e-107	8.59383e-106
hepatocyte	HEBP2	23.6617	1.39877	1.36437e-113	1.68519e-112
hepatocyte	ID2	23.6018	1.12971	1.6436e-115	2.05922e-114
hepatocyte	GLS2	23.4945	4.84343	2.33609e-105	2.679e-104
hepatocyte	ACADS	23.4608	1.9453	1.52925e-109	1.81328e-108
hepatocyte	XDH	23.3981	3.91213	2.609e-105	2.9876e-104
hepatocyte	MTCH2	23.3539	1.52089	2.00924e-110	2.39872e-109
hepatocyte	ETFA	23.3253	1.38267	1.44899e-110	1.73382e-109
hepatocyte	UGT3A1	23.2622	6.26166	4.3977e-103	4.95285e-102
hepatocyte	NEU4	23.1888	6.54788	1.83872e-102	2.05171e-101
hepatocyte	OSGIN1	23.166	3.6448	9.51209e-104	1.07669e-102
hepatocyte	SLC22A10	23.14	7.38144	4.53087e-102	5.03427e-101
hepatocyte	HACD3	23.1396	1.58115	2.29472e-108	2.69248e-107
hepatocyte	XIST	23.1154	1.32	2.09639e-110	2.50086e-109
hepatocyte	MT-ND2	23.0938	1.04541	3.13682e-105	3.58941e-104
hepatocyte	SKAP1	23.0473	4.296	2.37901e-102	2.65083e-101
hepatocyte	HNF4A	23.0337	2.53898	8.70691e-105	9.92702e-104
hepatocyte	NAT8	23.0037	3.47336	8.01807e-103	8.99157e-102
hepatocyte	ADGRG6	22.9437	2.17748	7.36696e-105	8.4054e-104
hepatocyte	COX5A	22.9287	1.08433	4.62063e-109	5.45825e-108
hepatocyte	MRPL57	22.8657	1.1195	2.76687e-108	3.24405e-107
hepatocyte	COX6C	22.7818	0.779709	6.05336e-109	7.13461e-108
hepatocyte	SNTB1	22.6839	3.10599	3.80133e-101	4.17058e-100
hepatocyte	IL1RN	22.6612	4.78949	4.48213e-99	4.82981e-98
hepatocyte	CMTM8	22.6449	2.40604	8.27827e-102	9.15914e-101
hepatocyte	BBOX1	22.61	3.93394	3.28208e-99	3.54885e-98
hepatocyte	HIBADH	22.5419	1.66922	7.08988e-103	7.96205e-102
hepatocyte	IL13RA1	22.5392	2.09279	1.33289e-101	1.46955e-100
hepatocyte	LARP4	22.4945	2.19	2.72058e-101	2.98902e-100
hepatocyte	TM7SF2	22.4661	2.01493	2.1628e-101	2.37953e-100
hepatocyte	AKR1C2	22.4001	2.54834	2.83058e-99	3.06698e-98
hepatocyte	CPN1	22.3222	5.88802	3.98844e-96	4.18586e-95
hepatocyte	TNFSF10	22.2438	1.66763	5.87426e-101	6.43588e-100
hepatocyte	DHRS1	22.238	1.76965	2.45188e-100	2.6751e-99
hepatocyte	GPLD1	22.163	4.95406	2.33004e-95	2.42272e-94
hepatocyte	CMTM6	22.1095	1.47782	4.61705e-100	5.03041e-99
hepatocyte	IVD	22.0968	1.72536	4.20097e-99	4.53307e-98
hepatocyte	ARHGEF26	22.0263	2.14895	3.11967e-97	3.29611e-96
hepatocyte	APOL1	21.9792	2.06134	2.19776e-97	2.32675e-96
hepatocyte	GNPNAT1	21.9237	2.05571	5.62089e-97	5.9348e-96
hepatocyte	IRS2	21.8939	1.52944	3.5217e-98	3.74861e-97
hepatocyte	PROZ	21.8767	6.68622	9.69833e-93	9.83035e-92
hepatocyte	AKR1A1	21.8623	1.28866	1.67727e-98	1.79752e-97
hepatocyte	GCKR	21.8568	5.02809	4.80967e-93	4.89726e-92
hepatocyte	MRPL14	21.8438	1.29409	2.15563e-98	2.30389e-97
hepatocyte	CFL2	21.8291	1.39851	3.2529e-98	3.46484e-97
hepatocyte	PECR	21.7623	2.03253	1.82764e-95	1.90665e-94
hepatocyte	NDUFC2	21.6844	0.920765	1.73932e-98	1.86275e-97
hepatocyte	ECI1	21.6584	1.46653	2.3347e-96	2.45518e-95
hepatocyte	C1orf115	21.6483	2.78765	4.27682e-93	4.35753e-92
hepatocyte	UAP1	21.647	1.90828	6.90458e-95	7.15554e-94
hepatocyte	SLC1A2	21.5973	6.68658	1.04954e-90	1.04033e-89
hepatocyte	TJP2	21.5718	1.84036	2.14826e-94	2.21903e-93
hepatocyte	SLC31A1	21.5221	2.28127	3.01845e-93	3.0794e-92
hepatocyte	PLA2G12B	21.5124	6.06135	3.36663e-90	3.32243e-89
hepatocyte	LINC01093	21.5028	6.57466	4.65985e-90	4.58428e-89
hepatocyte	RTP3	21.4424	6.61217	1.27108e-89	1.24269e-88
hepatocyte	AVPR1A	21.3132	3.26886	1.8307e-90	1.81122e-89
hepatocyte	SHBG	21.2956	5.12101	8.49242e-89	8.21073e-88
hepatocyte	KYNU	21.2833	4.6971	7.00997e-89	6.78999e-88
hepatocyte	DNAJB9	21.2224	1.49583	5.78503e-93	5.88275e-92
hepatocyte	OGDHL	21.1952	4.77216	3.18217e-88	3.05407e-87
hepatocyte	AGMAT	21.1932	3.57185	3.4781e-89	3.37937e-88
hepatocyte	MT-ND1	21.1491	0.921709	6.03765e-91	5.99605e-90
hepatocyte	MOGAT2	21.1128	6.77455	3.1391e-87	2.98177e-86
hepatocyte	SERPINE1	21.1036	2.59025	6.87857e-90	6.75011e-89
hepatocyte	SLC47A1	21.0885	4.41153	1.34557e-87	1.28201e-86
hepatocyte	COBLL1	21.0841	1.60531	2.15091e-91	2.14831e-90
hepatocyte	CLRN3	21.0698	5.52428	4.02073e-87	3.8169e-86
hepatocyte	PPARGC1A	21.0631	2.04646	4.37449e-90	4.30624e-89
hepatocyte	TPT1	21.0388	0.559155	2.02186e-93	2.06538e-92
hepatocyte	NAT2	21.0078	6.17667	1.51076e-86	1.42385e-85
hepatocyte	SLC16A1	20.9749	3.18257	6.99308e-88	6.68705e-87
hepatocyte	SCARB1	20.9704	3.26346	1.16715e-87	1.11337e-86
hepatocyte	ALKBH7	20.9702	1.03513	3.76689e-92	3.79369e-91
hepatocyte	FCGRT	20.9477	1.02397	4.09393e-92	4.11514e-91
hepatocyte	MMAB	20.9141	1.54235	3.28642e-90	3.24532e-89
hepatocyte	MSRA	20.8555	1.98972	9.80872e-89	9.47754e-88
hepatocyte	NIPSNAP1	20.7812	1.99601	5.11451e-88	4.89963e-87
hepatocyte	UGDH	20.7788	1.77082	1.88778e-88	1.8218e-87
hepatocyte	SLC17A2	20.7675	6.27064	8.16905e-85	7.59431e-84
hepatocyte	ABCC2	20.7232	5.7946	1.49498e-84	1.38489e-83
hepatocyte	PC	20.7066	4.58789	8.55998e-85	7.95304e-84
hepatocyte	TTC38	20.6604	2.1811	7.07589e-87	6.70099e-86
hepatocyte	ABCG5	20.6511	5.99154	5.25939e-84	4.83218e-83
hepatocyte	P4HB	20.5903	0.982921	2.86235e-89	2.78454e-88
hepatocyte	TCEA3	20.5831	1.27924	2.12305e-88	2.04634e-87
hepatocyte	FBXO2	20.5698	3.00557	1.00398e-84	9.31691e-84
hepatocyte	FDX1	20.5304	1.24656	4.60281e-88	4.41213e-87
hepatocyte	SHD	20.5184	6.6983	5.18242e-83	4.71733e-82
hepatocyte	ITIH4	20.2631	4.04009	4.65179e-82	4.18581e-81
hepatocyte	MRPL12	20.2308	1.31548	2.25982e-85	2.11334e-84
hepatocyte	GBE1	20.1136	2.14244	1.27487e-82	1.15311e-81
hepatocyte	ACSL5	20.0311	3.063	6.73426e-81	6.00807e-80
hepatocyte	KDM8	20.0014	4.3076	6.63076e-80	5.82965e-79
hepatocyte	ECH1	19.9835	0.922796	2.44379e-84	2.25451e-83
hepatocyte	MSRB2	19.9648	1.17087	1.25868e-83	1.14972e-82
hepatocyte	RAB11B-AS1	19.9445	2.15646	1.44993e-81	1.298e-80
hepatocyte	TTC39C	19.902	1.48946	1.43595e-82	1.29806e-81
hepatocyte	DHFR	19.899	2.98312	5.03901e-80	4.43517e-79
hepatocyte	GLDC	19.868	3.12328	1.3776e-79	1.20913e-78
hepatocyte	RNF128	19.8602	1.91975	3.34965e-81	2.99524e-80
hepatocyte	APOL6	19.7781	1.72882	7.18543e-81	6.40694e-80
hepatocyte	PZP	19.7693	6.41047	7.93277e-78	6.84789e-77
hepatocyte	TP53INP1	19.7385	1.3611	1.07512e-81	9.64113e-81
hepatocyte	ADK	19.6607	1.68958	3.94662e-80	3.48345e-79
hepatocyte	MPDZ	19.6352	2.18598	3.03949e-79	2.65887e-78
hepatocyte	LPA	19.6338	5.81308	5.97482e-77	5.09888e-76
hepatocyte	NNT	19.6164	2.13117	5.22211e-79	4.55297e-78
hepatocyte	PCYOX1	19.6159	1.42523	1.70195e-80	1.51155e-79
hepatocyte	ICAM3	19.6023	1.98534	2.04499e-79	1.7929e-78
hepatocyte	ANGPTL8	19.5865	3.59214	2.51153e-77	2.15151e-76
hepatocyte	KCNN2	19.5467	6.72981	2.86083e-76	2.41908e-75
hepatocyte	LINC01554	19.5311	5.76474	2.59612e-76	2.19879e-75
hepatocyte	MTSS1	19.4859	1.84753	1.37253e-78	1.19203e-77
hepatocyte	RAMP1	19.4612	1.9095	2.25117e-78	1.95296e-77
hepatocyte	PANK3	19.4435	2.1053	8.19911e-78	7.06616e-77
hepatocyte	GCDH	19.4194	2.01852	1.01708e-77	8.75582e-77
hepatocyte	C1RL	19.4103	1.68508	2.69201e-78	2.33412e-77
hepatocyte	IDNK	19.3938	2.17582	2.62695e-77	2.24916e-76
hepatocyte	ESR1	19.3907	4.61688	1.3338e-75	1.12001e-74
hepatocyte	ACAT2	19.3854	1.75157	8.70693e-78	7.49971e-77
hepatocyte	ACOT12	19.383	6.44037	3.67442e-75	3.06742e-74
hepatocyte	FNIP2	19.3744	1.61093	6.21081e-78	5.36732e-77
hepatocyte	SLC6A1	19.3689	2.96442	2.96806e-76	2.5084e-75
hepatocyte	UQCR10	19.352	0.732736	4.1961e-80	3.69949e-79
hepatocyte	SALL1	19.3315	2.697	2.55665e-76	2.16653e-75
hepatocyte	PAIP2B	19.3246	2.33122	1.06176e-76	9.03646e-76
hepatocyte	FURIN	19.3034	1.89749	3.67895e-77	3.14472e-76
hepatocyte	SOCS2	19.2915	1.72848	2.08148e-77	1.78408e-76
hepatocyte	DECR2	19.2401	2.06304	1.56324e-76	1.32757e-75
hepatocyte	CNIH1	19.2383	1.18764	4.83075e-78	4.18159e-77
hepatocyte	APMAP	19.1934	1.40876	4.41538e-77	3.77216e-76
hepatocyte	AFP	19.1834	5.42893	5.67435e-74	4.67242e-73
hepatocyte	CD81	19.1503	1.03305	5.02664e-78	4.34877e-77
hepatocyte	GCAT	19.1474	2.45965	3.01392e-75	2.52005e-74
hepatocyte	MAD1L1	19.0379	2.40943	1.55062e-74	1.28422e-73
hepatocyte	DCAF11	19.0325	1.6231	1.26681e-75	1.06432e-74
hepatocyte	NDUFB1	18.9682	0.7285	3.46197e-77	2.96086e-76
hepatocyte	UGT1A1	18.9421	5.82371	2.83404e-72	2.28688e-71
hepatocyte	ABCA8	18.8633	2.51667	2.03524e-73	1.66627e-72
hepatocyte	CYP39A1	18.8505	2.45639	3.75673e-73	3.06767e-72
hepatocyte	TMEM123	18.8084	0.953454	1.66747e-75	1.3987e-74
hepatocyte	SSR4	18.7474	0.772026	2.28014e-75	1.90854e-74
hepatocyte	NR3C1	18.7296	1.10371	2.08209e-74	1.72076e-73
hepatocyte	GNE	18.7269	2.25305	1.50647e-72	1.22001e-71
hepatocyte	AKR1C1	18.7233	1.03266	4.07511e-75	3.40011e-74
hepatocyte	HSD17B4	18.7198	1.49119	1.89215e-73	1.54993e-72
hepatocyte	DHRS3	18.7195	1.53036	9.93844e-74	8.17074e-73
hepatocyte	MCCC2	18.692	2.14848	1.8973e-72	1.53494e-71
hepatocyte	DNPH1	18.6912	1.02281	2.10522e-74	1.73897e-73
hepatocyte	FNDC4	18.6713	2.16891	3.87925e-72	3.12548e-71
hepatocyte	PDE3B	18.581	5.24174	5.65516e-70	4.45354e-69
hepatocyte	PPP2R1B	18.5795	2.10636	1.23371e-71	9.88917e-71
hepatocyte	SERPINA4	18.5521	1.03706	1.23009e-73	1.01024e-72
hepatocyte	H6PD	18.5129	1.70904	1.11714e-71	8.95933e-71
hepatocyte	MAOB	18.4834	1.12644	9.86469e-73	8.00951e-72
hepatocyte	NDUFA2	18.4275	0.818473	7.17403e-73	5.83089e-72
hepatocyte	MFAP3L	18.4229	4.3276	3.45172e-69	2.68598e-68
hepatocyte	GLRX	18.3938	1.35591	1.62145e-71	1.2984e-70
hepatocyte	CCDC57	18.3846	2.06353	2.02711e-70	1.60605e-69
hepatocyte	TTPA	18.364	2.37806	6.91661e-70	5.43878e-69
hepatocyte	ATP11C	18.3583	2.48283	6.57009e-70	5.16889e-69
hepatocyte	C1orf53	18.2918	2.57808	3.96759e-69	3.08283e-68
hepatocyte	AADAT	18.2721	4.09261	3.43818e-68	2.62347e-67
hepatocyte	NEAT1	18.1914	0.837702	1.90375e-70	1.50983e-69
hepatocyte	LGR4	18.1893	2.12958	6.88544e-69	5.33418e-68
hepatocyte	CNGA1	18.1839	2.77878	2.24127e-68	1.71685e-67
hepatocyte	WWP1	18.18	1.59397	1.52799e-69	1.19375e-68
hepatocyte	KMO	18.1562	5.42502	3.80311e-67	2.85343e-66
hepatocyte	PLIN5	18.1382	2.05405	9.91246e-69	7.65657e-68
hepatocyte	LACTB2	18.1199	1.89215	1.2466e-68	9.59121e-68
hepatocyte	LARP1B	18.0671	1.48682	5.56881e-69	4.32484e-68
hepatocyte	ADIPOR2	18.0444	1.91047	3.02846e-68	2.31534e-67
hepatocyte	SEC61B	18.032	0.746482	6.12245e-70	4.81913e-69
hepatocyte	C11orf54	17.8704	1.11235	3.29455e-68	2.5151e-67
hepatocyte	GCLM	17.8475	1.3002	1.44431e-67	1.09094e-66
hepatocyte	RXRA	17.8408	1.50624	2.52097e-67	1.89779e-66
hepatocyte	SLC46A3	17.8121	2.75223	7.49528e-66	5.53896e-65
hepatocyte	PSD3	17.7955	2.40134	5.68794e-66	4.21525e-65
hepatocyte	MRPL55	17.7822	1.00935	1.14717e-67	8.6692e-67
hepatocyte	MAOA	17.7689	1.26922	3.29752e-67	2.47882e-66
hepatocyte	PID1	17.7567	2.18007	7.46328e-66	5.51791e-65
hepatocyte	IGFBP4	17.7548	0.937381	3.9462e-68	3.00965e-67
hepatocyte	INHBE	17.7516	6.88971	2.38696e-64	1.72978e-63
hepatocyte	LONP2	17.6462	1.08444	1.23652e-66	9.21585e-66
hepatocyte	ABCC6	17.6415	2.20516	3.86746e-65	2.83007e-64
hepatocyte	PCCB	17.5932	2.28462	1.22223e-64	8.89e-64
hepatocyte	DDC	17.521	4.55852	3.78703e-63	2.702e-62
hepatocyte	SFXN5	17.4527	2.26197	6.98379e-64	5.03314e-63
hepatocyte	ORMDL3	17.3937	1.78198	7.88428e-64	5.6795e-63
hepatocyte	NR2F6	17.3834	1.85645	1.1323e-63	8.14539e-63
hepatocyte	NSUN6	17.3645	1.61599	5.50586e-64	3.96983e-63
hepatocyte	SDF2L1	17.3609	1.22435	2.73997e-64	1.98376e-63
hepatocyte	CFHR2	17.338	5.91849	9.60723e-62	6.72335e-61
hepatocyte	GFRA1	17.3283	5.3475	8.49267e-62	5.95131e-61
hepatocyte	IYD	17.3221	3.67978	3.37046e-62	2.37672e-61
hepatocyte	MAP2K1	17.3084	1.36651	1.2484e-63	8.97239e-63
hepatocyte	SEC11C	17.283	1.02695	4.56054e-64	3.29428e-63
hepatocyte	GPAT3	17.2712	3.17102	6.99013e-62	4.90496e-61
hepatocyte	TMED5	17.2627	1.45628	2.01169e-63	1.43924e-62
hepatocyte	PDK4	17.2605	1.22247	8.07278e-64	5.81262e-63
hepatocyte	KDELR2	17.2302	0.921868	5.44368e-64	3.9268e-63
hepatocyte	DGCR6L	17.2161	1.05575	1.26237e-63	9.06864e-63
hepatocyte	ST3GAL1	17.2029	1.84114	1.72927e-62	1.22436e-61
hepatocyte	SLC39A8	17.187	3.13965	1.81165e-61	1.26054e-60
hepatocyte	CEBPD	17.1833	0.800841	3.97923e-64	2.87967e-63
hepatocyte	SULT1E1	17.18	7.45423	1.04333e-60	7.16423e-60
hepatocyte	HSDL2	17.1747	1.35165	6.01995e-63	4.28931e-62
hepatocyte	LDHA	17.1623	0.832182	1.6087e-63	1.15408e-62
hepatocyte	ISOC1	17.1514	1.52946	1.4536e-62	1.03057e-61
hepatocyte	PAPSS2	17.1503	2.36274	1.28749e-61	8.9821e-61
hepatocyte	BPHL	17.1235	1.6025	3.46394e-62	2.44154e-61
hepatocyte	ERLIN1	17.0918	2.24773	2.25377e-61	1.56607e-60
hepatocyte	NFIA	17.0797	0.914002	6.36836e-63	4.53345e-62
hepatocyte	TGM2	17.0675	2.2526	3.90629e-61	2.69884e-60
hepatocyte	BID	17.0342	2.02734	3.4952e-61	2.42121e-60
hepatocyte	DHCR7	17.0287	2.26559	6.61995e-61	4.56367e-60
hepatocyte	HSP90B1	17.0095	0.778361	1.37229e-62	9.73804e-62
hepatocyte	NDUFV3	16.9361	0.992699	7.47383e-62	5.24202e-61
hepatocyte	KLF9	16.9275	1.01712	1.18686e-61	8.28377e-61
hepatocyte	SMIM1	16.9059	1.98543	1.80294e-60	1.23317e-59
hepatocyte	AQP11	16.9017	3.85005	2.33976e-59	1.5804e-58
hepatocyte	P4HA1	16.884	2.1815	7.38404e-60	5.01559e-59
hepatocyte	GLRX5	16.8554	1.04594	3.86399e-61	2.6708e-60
hepatocyte	CYP2C19	16.833	7.28118	1.57125e-58	1.04646e-57
hepatocyte	IL6ST	16.7839	0.960025	8.17088e-61	5.62052e-60
hepatocyte	CTSB	16.761	0.852196	7.03216e-61	4.84571e-60
hepatocyte	GREM2	16.7191	5.72267	7.03258e-58	4.62878e-57
hepatocyte	CYP4F11	16.7015	2.91159	1.47642e-58	9.84137e-58
hepatocyte	MT-CYB	16.5913	0.751637	3.51352e-58	2.32523e-57
hepatocyte	TP53TG1	16.5519	1.25459	7.01789e-59	4.70786e-58
hepatocyte	SMCO4	16.5166	1.22604	1.38992e-58	9.27266e-58
hepatocyte	RPA3	16.5122	1.11897	1.03818e-58	6.94667e-58
hepatocyte	MAN2A1	16.5108	1.79041	6.1955e-58	4.08124e-57
hepatocyte	FASN	16.4546	2.79737	6.62138e-57	4.28277e-56
hepatocyte	MRPL54	16.4373	0.928971	1.63002e-58	1.08514e-57
hepatocyte	HABP2	16.4323	1.25367	4.37901e-58	2.89434e-57
hepatocyte	SLC9B2	16.4284	3.25867	1.24364e-56	8.01429e-56
hepatocyte	ACBD5	16.3877	1.92461	3.70217e-57	2.4045e-56
hepatocyte	ENDOG	16.373	2.06554	8.05848e-57	5.19946e-56
hepatocyte	SDSL	16.3673	1.8467	6.79888e-57	4.39396e-56
hepatocyte	IL27	16.3426	7.10563	1.6079e-55	1.02274e-54
hepatocyte	USH2A	16.3379	6.41228	1.64482e-55	1.0458e-54
hepatocyte	SLC16A2	16.3046	2.51417	3.0331e-56	1.94423e-55
hepatocyte	CCDC167	16.3001	1.41014	4.79431e-57	3.1074e-56
hepatocyte	LAP3	16.2986	1.28884	4.35478e-57	2.82719e-56
hepatocyte	SMPDL3A	16.2501	1.77678	2.48483e-56	1.59343e-55
hepatocyte	RORA	16.2313	1.36523	1.38596e-56	8.92408e-56
hepatocyte	RDH10	16.2039	2.61072	1.58034e-55	1.00562e-54
hepatocyte	ADGRA3	16.17	2.08065	1.71859e-55	1.09227e-54
hepatocyte	PCTP	16.1667	2.48878	2.60558e-55	1.65065e-54
hepatocyte	CLUH	16.1252	1.92056	2.0818e-55	1.32097e-54
hepatocyte	AASS	16.0716	1.88976	3.56588e-55	2.25537e-54
hepatocyte	ALDH7A1	16.0597	1.39092	2.07875e-55	1.31957e-54
hepatocyte	SLC25A20	16.0576	2.46021	1.02898e-54	6.46393e-54
hepatocyte	XYLB	16.0511	3.11964	2.58439e-54	1.61445e-53
hepatocyte	COX6A2	16.0001	3.13717	5.41182e-54	3.3514e-53
hepatocyte	EXPH5	15.9924	3.36063	7.33998e-54	4.53474e-53
hepatocyte	MAGT1	15.9911	1.38287	4.67278e-55	2.95191e-54
hepatocyte	CDC37L1	15.9632	1.30192	7.48937e-55	4.71416e-54
hepatocyte	FXN	15.944	1.63217	1.5398e-54	9.65356e-54
hepatocyte	HSD17B14	15.9397	3.59855	1.81354e-53	1.11517e-52
hepatocyte	TRPM8	15.9019	4.08253	3.44225e-53	2.10106e-52
hepatocyte	RETSAT	15.8767	1.92034	7.95165e-54	4.90878e-53
hepatocyte	SEC16B	15.8553	3.79302	6.78367e-53	4.12455e-52
hepatocyte	SLC23A2	15.8328	2.29727	2.40589e-53	1.47364e-52
hepatocyte	CRLS1	15.8326	1.10981	2.69402e-54	1.68159e-53
hepatocyte	SYT7	15.8272	4.57535	1.29241e-52	7.82167e-52
hepatocyte	ARMC6	15.8156	2.07153	2.01756e-53	1.23868e-52
hepatocyte	GPX1	15.7968	0.738099	1.56055e-54	9.77977e-54
hepatocyte	SLC41A2	15.7945	1.72708	1.61318e-53	9.92742e-53
hepatocyte	MT-ND3	15.794	0.718437	2.69393e-53	1.64943e-52
hepatocyte	CTBS	15.7894	1.59711	1.45154e-53	8.93971e-53
hepatocyte	PI4K2B	15.7636	2.60488	1.01764e-52	6.16825e-52
hepatocyte	TIMM10	15.755	1.04688	5.90994e-54	3.65843e-53
hepatocyte	FOLH1	15.7517	5.07059	4.44351e-52	2.66356e-51
hepatocyte	MRPL34	15.7023	0.95444	1.2061e-53	7.43681e-53
hepatocyte	RAPH1	15.6963	1.7392	6.83126e-53	4.15187e-52
hepatocyte	RBKS	15.6662	2.36721	2.7869e-52	1.6763e-51
hepatocyte	NDUFB2	15.5667	0.581447	2.79852e-53	1.71146e-52
hepatocyte	OXT	15.5275	4.70616	7.94625e-51	4.6688e-50
hepatocyte	MCFD2	15.5007	1.22527	5.31911e-52	3.18478e-51
hepatocyte	HSD17B8	15.4416	1.23319	1.00541e-51	5.99011e-51
hepatocyte	C2orf72	15.4093	1.81865	5.09469e-51	3.01026e-50
hepatocyte	DEPDC7	15.3993	4.29519	4.33572e-50	2.52384e-49
hepatocyte	EI24	15.3629	0.862501	1.47906e-51	8.7821e-51
hepatocyte	SCML1	15.3539	1.49138	5.61683e-51	3.31378e-50
hepatocyte	IL6R	15.348	1.50611	6.07741e-51	3.58282e-50
hepatocyte	PIK3R1	15.3329	1.31187	5.53569e-51	3.26714e-50
hepatocyte	MRPL46	15.3328	1.40297	7.57221e-51	4.45236e-50
hepatocyte	SLC6A12	15.3162	5.72848	1.84873e-49	1.06589e-48
hepatocyte	SEC24A	15.3097	2.22095	3.2613e-50	1.90265e-49
hepatocyte	PPP1R3B	15.3068	1.72915	1.4926e-50	8.74682e-50
hepatocyte	NIT2	15.2607	1.1167	1.37019e-50	8.03248e-50
hepatocyte	SEPSECS	15.2271	2.51504	1.21459e-49	7.02851e-49
hepatocyte	COX5B	15.214	0.492414	5.4344e-51	3.20856e-50
hepatocyte	IRS1	15.2049	1.96351	8.93015e-50	5.18101e-49
hepatocyte	ECHDC3	15.1637	1.26604	6.73989e-50	3.91462e-49
hepatocyte	LRCOL1	15.1598	4.99768	1.3458e-48	7.65805e-48
hepatocyte	C11orf24	15.1483	1.68236	1.49752e-49	8.64664e-49
hepatocyte	MCEE	15.1454	1.59679	1.24133e-49	7.1806e-49
hepatocyte	SLC28A1	15.08	4.54673	3.32872e-48	1.88256e-47
hepatocyte	DNAJC15	15.0735	0.897682	9.85365e-50	5.71046e-49
hepatocyte	LHPP	15.0685	2.23774	8.86472e-49	5.05164e-48
hepatocyte	AURKAIP1	15.0358	0.684935	9.2302e-50	5.35113e-49
hepatocyte	GALNT2	15.0336	1.5357	5.44777e-49	3.11576e-48
hepatocyte	SULT1B1	15.0059	4.763	8.15167e-48	4.58378e-47
hepatocyte	LAMA5-AS1	14.9911	4.51726	1.07897e-47	6.05634e-47
hepatocyte	TRIM55	14.9696	5.63824	1.80189e-47	1.0071e-46
hepatocyte	G0S2	14.9543	1.62849	2.92652e-48	1.65689e-47
hepatocyte	CLCN5	14.9425	2.95413	9.90217e-48	5.56214e-47
hepatocyte	TMEM53	14.9285	1.9147	3.88222e-48	2.19244e-47
hepatocyte	SYBU	14.9282	1.51594	2.57612e-48	1.46008e-47
hepatocyte	TPD52L1	14.9139	1.75683	5.04699e-48	2.84716e-47
hepatocyte	RNF125	14.9137	3.33522	1.77984e-47	9.95483e-47
hepatocyte	CLPX	14.864	1.48839	5.52272e-48	3.11218e-47
hepatocyte	CANX	14.8413	0.799711	1.95999e-48	1.11369e-47
hepatocyte	CHN2	14.8313	2.60783	2.85467e-47	1.58985e-46
hepatocyte	CLPTM1L	14.831	1.79098	1.64229e-47	9.19531e-47
hepatocyte	MPC1	14.8114	0.752326	3.21262e-48	1.81755e-47
hepatocyte	NUDT8	14.8045	1.81681	1.76402e-47	9.86984e-47
hepatocyte	ABCG8	14.8026	7.0766	1.77969e-46	9.77304e-46
hepatocyte	SERP1	14.7942	0.714254	3.60498e-48	2.03733e-47
hepatocyte	AIFM1	14.7686	1.68871	2.98821e-47	1.66363e-46
hepatocyte	PPARA	14.7633	1.47012	1.73363e-47	9.70324e-47
hepatocyte	PKLR	14.7496	6.15818	3.37235e-46	1.84161e-45
hepatocyte	CYP4F12	14.6882	2.97881	2.59167e-46	1.41923e-45
hepatocyte	NAA38	14.6429	0.761936	2.83686e-47	1.5805e-46
hepatocyte	SURF4	14.6361	1.06713	7.02996e-47	3.89449e-46
hepatocyte	ANAPC11	14.5496	0.651727	9.0219e-47	4.98744e-46
hepatocyte	CISH	14.5454	2.28215	1.13328e-45	6.1481e-45
hepatocyte	PCOLCE2	14.5414	2.99673	2.14523e-45	1.1598e-44
hepatocyte	NUDT5	14.5177	1.14189	4.08589e-46	2.22971e-45
hepatocyte	TRPM4	14.479	2.18185	2.33489e-45	1.26103e-44
hepatocyte	ABCA5	14.4779	1.41542	9.70801e-46	5.27577e-45
hepatocyte	EDEM1	14.4702	1.93244	1.78872e-45	9.68054e-45
hepatocyte	SLC2A4RG	14.467	1.40694	1.09301e-45	5.93169e-45
hepatocyte	PNPLA3	14.4448	2.89952	6.81361e-45	3.64607e-44
hepatocyte	CISD1	14.4196	0.956693	1.0383e-45	5.64065e-45
hepatocyte	SIGMAR1	14.4027	1.41931	2.66085e-45	1.43461e-44
hepatocyte	TENM1	14.3559	5.22493	4.75764e-44	2.50075e-43
hepatocyte	BCKDHB	14.3408	1.94669	1.12893e-44	6.02464e-44
hepatocyte	MLIP	14.3312	5.33148	6.52737e-44	3.42523e-43
hepatocyte	COL18A1	14.3143	0.80859	3.19958e-45	1.72271e-44
hepatocyte	GK	14.2942	1.80732	2.04529e-44	1.08559e-43
hepatocyte	LDLRAD4	14.2579	2.90281	7.98602e-44	4.18787e-43
hepatocyte	RORC	14.2504	1.74176	3.11709e-44	1.64503e-43
hepatocyte	TCP10L	14.2179	4.03413	2.11314e-43	1.09787e-42
hepatocyte	DDAH1	14.204	1.18739	2.73316e-44	1.4463e-43
hepatocyte	HDLBP	14.2032	0.881701	1.77855e-44	9.4497e-44
hepatocyte	ELOVL6	14.1865	2.82837	1.53247e-43	7.9856e-43
hepatocyte	KANK1	14.1865	1.38921	4.6e-44	2.41951e-43
hepatocyte	CEBPA	14.1231	1.82181	1.6423e-43	8.54944e-43
hepatocyte	ADGRG7	14.112	3.33499	7.34814e-43	3.78018e-42
hepatocyte	DESI1	14.0375	1.38635	3.423e-43	1.77254e-42
hepatocyte	CBR4	14.0313	1.21336	2.68416e-43	1.39178e-42
hepatocyte	PCYT2	14.0091	1.33635	4.74639e-43	2.44975e-42
hepatocyte	SLC22A9	14.0088	3.69865	2.54678e-42	1.29784e-41
hepatocyte	CYP3A7	14.005	4.13173	3.12659e-42	1.58816e-41
hepatocyte	ABCC9	13.9766	1.92509	1.19406e-42	6.1247e-42
hepatocyte	GAS2	13.944	2.21111	2.36223e-42	1.20497e-41
hepatocyte	SFXN1	13.9231	1.2493	1.09127e-42	5.60295e-42
hepatocyte	COX17	13.9112	0.622081	4.4122e-43	2.27802e-42
hepatocyte	KLB	13.9063	3.91696	9.53481e-42	4.80133e-41
hepatocyte	ERGIC1	13.8688	1.07812	2.21269e-42	1.12905e-41
hepatocyte	USP30-AS1	13.8629	4.41892	2.12138e-41	1.06245e-40
hepatocyte	SLC25A15	13.8613	3.40691	1.5972e-41	8.01457e-41
hepatocyte	PPP1R3C	13.8564	2.20678	8.36898e-42	4.22238e-41
hepatocyte	CGNL1	13.8282	1.86333	9.10785e-42	4.59074e-41
hepatocyte	FADS2	13.8262	2.35786	1.29781e-41	6.52269e-41
hepatocyte	COX7B	13.7671	0.562181	3.3348e-42	1.69283e-41
hepatocyte	SLC7A9	13.742	5.4787	1.15355e-40	5.68845e-40
hepatocyte	SLC22A18	13.7335	1.38245	1.73931e-41	8.72488e-41
hepatocyte	TM6SF2	13.6981	5.25546	1.90237e-40	9.33129e-40
hepatocyte	PINK1	13.6587	1.20751	3.68562e-41	1.83475e-40
hepatocyte	GABARAPL1	13.643	0.953924	3.38597e-41	1.68665e-40
hepatocyte	MME	13.6186	2.81923	2.44902e-40	1.19902e-39
hepatocyte	PDLIM5	13.6183	0.838378	3.56635e-41	1.77594e-40
hepatocyte	TXNDC17	13.6143	0.801383	3.92497e-41	1.95267e-40
hepatocyte	MBNL3	13.5977	1.75866	1.49198e-40	7.34351e-40
hepatocyte	NR1I2	13.5493	5.93633	1.23462e-39	5.9555e-39
hepatocyte	GBP7	13.5435	2.80862	5.79645e-40	2.81944e-39
hepatocyte	SLC1A1	13.5432	2.02159	3.83573e-40	1.87153e-39
hepatocyte	OSBP	13.5255	1.52333	3.03272e-40	1.48202e-39
hepatocyte	DDI2	13.5234	1.57508	2.82853e-40	1.3831e-39
hepatocyte	TBCA	13.4457	0.537441	2.23057e-40	1.09275e-39
hepatocyte	LYPLA1	13.4232	0.890119	5.07725e-40	2.47268e-39
hepatocyte	FITM1	13.4168	3.84606	4.56546e-39	2.17621e-38
hepatocyte	SLC25A1	13.402	1.13497	8.80102e-40	4.26242e-39
hepatocyte	DUSP23	13.3801	0.83392	7.99047e-40	3.87344e-39
hepatocyte	RMND5A	13.3617	1.33557	1.98623e-39	9.53134e-39
hepatocyte	TAB2	13.3289	1.65818	3.79754e-39	1.81402e-38
hepatocyte	ENHO	13.3217	3.72606	1.41935e-38	6.70052e-38
hepatocyte	RAD23B	13.3194	0.862666	1.89922e-39	9.11659e-39
hepatocyte	CUX2	13.3034	3.11285	1.51902e-38	7.156e-38
hepatocyte	COX14	13.2972	0.669744	1.8283e-39	8.78153e-39
hepatocyte	GRHL1	13.2884	2.90755	1.45545e-38	6.86272e-38
hepatocyte	HS3ST3B1	13.2785	1.6878	6.99605e-39	3.3227e-38
hepatocyte	PEX11G	13.276	2.04258	9.55796e-39	4.52987e-38
hepatocyte	AGTR1	13.2716	1.59489	5.85792e-39	2.78806e-38
hepatocyte	APOC4-APOC2	13.2665	5.65385	3.66505e-38	1.71168e-37
hepatocyte	TIMM8B	13.2659	0.668267	2.66205e-39	1.27433e-38
hepatocyte	ENTPD3-AS1	13.2447	1.47972	8.4765e-39	4.02096e-38
hepatocyte	SLC38A2	13.2153	0.739416	6.5056e-39	3.09351e-38
hepatocyte	N4BP2L1	13.2088	1.12236	9.94244e-39	4.70782e-38
hepatocyte	CLYBL	13.2044	1.65711	1.75613e-38	8.25817e-38
hepatocyte	FAM210B	13.1853	1.04828	1.23496e-38	5.83709e-38
hepatocyte	KCND3	13.1577	3.32284	8.89605e-38	4.11439e-37
hepatocyte	PEPD	13.1124	1.01542	3.45587e-38	1.61545e-37
hepatocyte	HSBP1L1	13.1082	1.10746	3.47475e-38	1.62379e-37
hepatocyte	NDUFA6	13.0923	0.658754	2.48687e-38	1.16526e-37
hepatocyte	PYGL	13.0789	1.70707	9.45368e-38	4.36972e-37
hepatocyte	ABLIM3	13.0717	1.52902	8.81703e-38	4.08145e-37
hepatocyte	NR1H4	13.0716	1.10539	5.37196e-38	2.50145e-37
hepatocyte	TPMT	13.067	1.28857	7.30816e-38	3.39298e-37
hepatocyte	CBR1	13.0643	0.833119	5.2804e-38	2.45954e-37
hepatocyte	BZW1	13.0615	0.765651	4.3401e-38	2.02396e-37
hepatocyte	FAHD2A	13.0562	1.17251	7.48155e-38	3.47041e-37
hepatocyte	SEC23A	13.0543	1.13186	6.53157e-38	3.03602e-37
hepatocyte	SURF1	13.0317	0.831117	6.58807e-38	3.06138e-37
hepatocyte	THRB	13.0093	1.74669	2.05755e-37	9.44934e-37
hepatocyte	FAM8A1	12.9945	1.36457	2.11363e-37	9.7012e-37
hepatocyte	PNPO	12.9919	2.08419	3.59439e-37	1.64592e-36
hepatocyte	FAXDC2	12.9883	1.43161	2.08506e-37	9.57289e-37
hepatocyte	ZFAND2A	12.9798	1.41562	2.14902e-37	9.86077e-37
hepatocyte	NDUFV2	12.9575	0.613428	1.43499e-37	6.60952e-37
hepatocyte	ZCCHC2	12.939	1.88581	6.19615e-37	2.82249e-36
hepatocyte	AGPAT2	12.9169	0.895469	3.29244e-37	1.50853e-36
hepatocyte	BOK	12.9061	1.32632	5.58268e-37	2.54674e-36
hepatocyte	FAM13A	12.8562	1.05865	7.78535e-37	3.54128e-36
hepatocyte	SLC22A3	12.8491	3.12115	2.94634e-36	1.32219e-35
hepatocyte	STRADB	12.8355	1.25833	1.26228e-36	5.71189e-36
hepatocyte	TBX15	12.834	5.2863	6.12958e-36	2.73663e-35
hepatocyte	SEC24B	12.8281	1.60025	1.85026e-36	8.33172e-36
hepatocyte	SH3BGRL2	12.8199	1.59617	1.74706e-36	7.87152e-36
hepatocyte	NQO2	12.7704	0.969895	1.8565e-36	8.35744e-36
hepatocyte	CES3	12.7672	5.59873	1.37713e-35	6.10328e-35
hepatocyte	SMIM19	12.6734	0.741394	5.05319e-36	2.25927e-35
hepatocyte	LPIN1	12.6633	1.61477	1.38403e-35	6.13214e-35
hepatocyte	RDX	12.6559	0.769203	6.75057e-36	3.01045e-35
hepatocyte	YIF1A	12.6401	0.76643	8.39328e-36	3.73772e-35
hepatocyte	ACSM3	12.5879	1.42937	2.76487e-35	1.21439e-34
hepatocyte	ABCD3	12.5855	0.992034	1.87945e-35	8.28741e-35
hepatocyte	CCS	12.5783	0.868271	1.92579e-35	8.48696e-35
hepatocyte	MT-ND6	12.5451	0.867268	2.89093e-35	1.26941e-34
hepatocyte	SLC17A3	12.5237	4.00416	1.93138e-34	8.35462e-34
hepatocyte	ANKS4B	12.5041	3.44427	1.75377e-34	7.59256e-34
hepatocyte	NFIL3	12.4342	1.41063	1.73074e-34	7.497e-34
hepatocyte	ACACB	12.4206	1.42621	1.73504e-34	7.51358e-34
hepatocyte	CLDN2	12.4048	5.02593	7.62705e-34	3.25621e-33
hepatocyte	PLEK2	12.3935	2.07857	4.29222e-34	1.84299e-33
hepatocyte	GUCD1	12.3777	1.12165	2.77177e-34	1.19537e-33
hepatocyte	MET	12.3523	1.47565	4.6146e-34	1.97925e-33
hepatocyte	CHST13	12.3402	2.06786	7.40717e-34	3.16492e-33
hepatocyte	CPEB4	12.3157	0.896756	4.46444e-34	1.91589e-33
hepatocyte	LIPG	12.3134	2.29415	1.24024e-33	5.26775e-33
hepatocyte	CISD2	12.3074	0.88683	4.82651e-34	2.06958e-33
hepatocyte	GPER1	12.2978	2.99604	1.70849e-33	7.24677e-33
hepatocyte	EIF4EBP1	12.2902	1.02762	6.41596e-34	2.74438e-33
hepatocyte	CCDC71L	12.2756	1.35344	1.15793e-33	4.92083e-33
hepatocyte	SPCS3	12.271	1.06657	8.70223e-34	3.7102e-33
hepatocyte	HYAL1	12.2651	1.24674	1.11135e-33	4.72926e-33
hepatocyte	DGAT1	12.2126	1.80141	2.96279e-33	1.2513e-32
hepatocyte	SLC25A42	12.2006	2.19251	3.65453e-33	1.54014e-32
hepatocyte	STYX	12.1505	1.65632	5.121e-33	2.14893e-32
hepatocyte	AGPAT3	12.1014	1.57401	9.068e-33	3.78802e-32
hepatocyte	ALDH1B1	12.0872	1.0141	7.02833e-33	2.9438e-32
hepatocyte	TXN	12.0846	0.502755	4.81527e-33	2.02172e-32
hepatocyte	HMGCS1	12.0798	1.08883	8.31851e-33	3.47863e-32
hepatocyte	SLC19A2	12.051	1.75258	1.7644e-32	7.33348e-32
hepatocyte	TEX30	12.0413	1.43175	1.74776e-32	7.26624e-32
hepatocyte	FAM20A	12.0069	1.54729	2.86178e-32	1.18382e-31
hepatocyte	SLC16A10	12.0051	2.7942	4.93394e-32	2.03191e-31
hepatocyte	SYT17	11.9955	3.62028	6.83312e-32	2.80814e-31
hepatocyte	RRBP1	11.9942	0.678944	1.53306e-32	6.37869e-32
hepatocyte	WDR72	11.9934	1.85606	3.63814e-32	1.50142e-31
hepatocyte	TIMM8A	11.9737	1.58183	4.06481e-32	1.67661e-31
hepatocyte	PAQR9-AS1	11.942	3.09828	1.085e-31	4.43112e-31
hepatocyte	ADRB2	11.9357	2.33176	8.20572e-32	3.3643e-31
hepatocyte	ZBTB18	11.9262	2.03735	8.04093e-32	3.29846e-31
hepatocyte	MRPS33	11.9251	0.796589	4.0234e-32	1.65997e-31
hepatocyte	CYP17A1	11.9136	3.85229	1.61779e-31	6.56773e-31
hepatocyte	ARRDC4	11.9064	2.21225	1.21753e-31	4.96072e-31
hepatocyte	PRDX1	11.8438	0.502473	8.40162e-32	3.44282e-31
hepatocyte	DBH-AS1	11.8416	3.61561	3.66579e-31	1.47147e-30
hepatocyte	ADCY1	11.8281	2.30181	2.72018e-31	1.09807e-30
hepatocyte	TIMM13	11.8206	0.643121	1.17242e-31	4.78177e-31
hepatocyte	PON2	11.8029	0.868286	1.84744e-31	7.49035e-31
hepatocyte	AHR	11.7847	1.28514	2.99611e-31	1.20759e-30
hepatocyte	SCG5	11.7708	2.65645	6.26618e-31	2.50058e-30
hepatocyte	DERL1	11.7621	1.01495	3.16972e-31	1.27625e-30
hepatocyte	KLC4	11.741	1.48192	5.01111e-31	2.00636e-30
hepatocyte	TMEM37	11.7084	1.02322	5.73949e-31	2.29287e-30
hepatocyte	EIF4EBP2	11.7031	0.886983	5.48375e-31	2.19392e-30
hepatocyte	POLR2F	11.677	0.598254	5.68746e-31	2.2731e-30
hepatocyte	SLC17A9	11.6621	2.04975	1.69866e-30	6.70039e-30
hepatocyte	LIN7C	11.6536	1.26776	1.22489e-30	4.85474e-30
hepatocyte	HMOX1	11.6535	2.04403	1.98064e-30	7.80286e-30
hepatocyte	PNPLA4	11.6013	1.02346	1.85869e-30	7.32426e-30
hepatocyte	TMEM208	11.5906	0.704938	1.68435e-30	6.64728e-30
hepatocyte	PDE4DIP	11.5755	1.28579	2.67667e-30	1.05186e-29
hepatocyte	PGRMC2	11.5745	0.866756	2.30901e-30	9.08512e-30

## Sheet: S6_Top1000_markers_MSC_Tissue
Supplementary Dataset 3_S6: Top1000 Marker gene list of Portal mesenchyme (MSC) in human Tissue related to Fig. 4 and Extended Data Fig. 8
group	names	scores	logfoldchanges	pvals	pvals_adj
mesenchyme	IGFBP7	193.095	8.85326	0	0
mesenchyme	LGALS1	123.001	4.8004	0	0
mesenchyme	TAGLN	120.588	8.37643	0	0
mesenchyme	MYL9	111.113	6.76107	0	0
mesenchyme	TPM2	104.27	7.78903	0	0
mesenchyme	VIM	99.183	4.53498	0	0
mesenchyme	ACTA2	93.8908	7.57902	0	0
mesenchyme	BGN	82.1534	8.70316	0	0
mesenchyme	CALD1	77.4533	2.9449	0	0
mesenchyme	GPX3	76.1162	5.36052	0	0
mesenchyme	PLAC9	74.186	7.87855	0	0
mesenchyme	SPARCL1	68.5735	7.25036	0	0
mesenchyme	ID3	68.2369	6.28683	0	0
mesenchyme	SPARC	66.8239	7.0667	0	0
mesenchyme	MFGE8	64.0213	6.5587	0	0
mesenchyme	C11orf96	63.251	7.15726	0	0
mesenchyme	MGP	63.06	6.89391	0	0
mesenchyme	ADIRF	62.6701	4.62304	0	0
mesenchyme	JUNB	62.3175	3.2777	0	0
mesenchyme	SOD3	62.0351	3.63663	0	0
mesenchyme	COX7A1	62.0216	6.74379	0	0
mesenchyme	PPP1R14A	61.1476	7.56354	0	0
mesenchyme	IGFBP5	60.3714	8.65873	0	0
mesenchyme	CRIP1	58.7208	8.39095	0	0
mesenchyme	TMSB4X	56.451	2.12536	0	0
mesenchyme	MYH11	55.8585	7.39061	0	0
mesenchyme	NDUFA4L2	55.5322	7.91163	0	0
mesenchyme	FRZB	54.1487	7.28564	0	0
mesenchyme	RGS5	53.4843	7.15066	0	0
mesenchyme	PCSK7	51.7118	4.47387	0	0
mesenchyme	TIMP3	50.5369	4.46441	0	0
mesenchyme	MALAT1	50.4086	2.01836	0	0
mesenchyme	PDGFRB	49.866	7.20295	0	0
mesenchyme	LBH	49.6179	4.69651	0	0
mesenchyme	MEF2C	49.1853	6.97669	0	0
mesenchyme	HSPB1	48.9125	2.17149	0	0
mesenchyme	ACTB	48.874	1.75505	0	0
mesenchyme	COL6A2	48.8487	8.04754	0	0
mesenchyme	PTMA	47.8203	1.37321	0	0
mesenchyme	MYL6	46.4588	1.5836	0	0
mesenchyme	GSN	46.32	3.06719	0	0
mesenchyme	TINAGL1	45.9899	3.54173	0	0
mesenchyme	MAP1B	45.7436	8.41961	0	0
mesenchyme	NR4A1	45.4908	3.9332	0	0
mesenchyme	FABP4	45.0553	7.31965	3.78672e-308	2.38929e-306
mesenchyme	TUBA1B	44.0463	2.53189	0	0
mesenchyme	TPM1	43.9081	2.46113	0	0
mesenchyme	GEM	43.7077	6.18838	1.3232e-296	7.78608e-295
mesenchyme	RERGL	43.6116	7.36476	5.06448e-294	2.92788e-292
mesenchyme	CRISPLD2	43.4203	6.8092	1.18967e-292	6.84648e-291
mesenchyme	TUBA1A	43.1993	3.16773	0	0
mesenchyme	ISYNA1	43.1413	3.38442	0	1.0778e-306
mesenchyme	MYLK	43.0357	3.66426	3.82714e-297	2.26899e-295
mesenchyme	CD9	42.8762	2.86779	0	9.22208e-307
mesenchyme	CCDC3	42.3065	7.1413	3.84164e-281	2.11035e-279
mesenchyme	B2M	42.0989	1.14103	0	0
mesenchyme	RGS16	41.9979	7.03557	3.87896e-278	2.10146e-276
mesenchyme	MFAP4	41.7474	7.96754	3.74476e-275	2.01486e-273
mesenchyme	CCDC85B	41.2404	3.31604	1.3466e-282	7.42329e-281
mesenchyme	DCN	40.9699	7.35661	5.59901e-268	2.9322e-266
mesenchyme	SH3BGRL	40.9274	2.79604	2.308e-288	1.30906e-286
mesenchyme	NOTCH3	40.7773	6.05115	3.26464e-267	1.69837e-265
mesenchyme	ALDOA	40.63	2.21866	8.69998e-297	5.13855e-295
mesenchyme	FLNA	40.3712	3.08497	1.7259e-278	9.41515e-277
mesenchyme	GNG11	40.3119	4.45359	3.12761e-267	1.63249e-265
mesenchyme	COX4I2	39.688	7.11148	1.06414e-255	5.17606e-254
mesenchyme	COLEC11	39.3956	6.18948	7.4988e-253	3.59188e-251
mesenchyme	CSRP2	39.1033	3.61615	8.21445e-257	4.02048e-255
mesenchyme	CSRP1	38.821	3.39593	4.12942e-256	2.01482e-254
mesenchyme	RCAN2	38.326	5.00834	1.25692e-244	5.80807e-243
mesenchyme	ID4	38.1487	5.68555	4.47269e-242	2.01927e-240
mesenchyme	CAV1	37.9484	2.63448	7.38751e-257	3.62704e-255
mesenchyme	IFITM2	37.6415	2.03637	1.19368e-255	5.78825e-254
mesenchyme	DSTN	37.5956	1.86251	1.37104e-259	6.81659e-258
mesenchyme	OAZ2	37.4886	2.86702	1.00267e-244	4.64689e-243
mesenchyme	TGFB1I1	37.4479	4.17196	5.72392e-239	2.56207e-237
mesenchyme	PTGIR	37.0248	7.68011	1.10736e-229	4.6894e-228
mesenchyme	ARHGDIB	36.7178	3.99525	2.58102e-232	1.11402e-230
mesenchyme	ARPC2	36.4792	2.04468	2.21285e-244	1.01655e-242
mesenchyme	PGF	36.4523	6.75837	1.21445e-224	4.94308e-223
mesenchyme	CARMN	36.098	7.98779	1.33335e-220	5.25019e-219
mesenchyme	PDLIM3	35.9496	4.73922	7.52255e-222	2.99966e-220
mesenchyme	S100A6	35.9037	2.1899	1.74116e-250	8.23956e-249
mesenchyme	COL6A1	35.7912	4.69917	5.90087e-220	2.31194e-218
mesenchyme	NBEAL1	35.7298	2.04739	5.84452e-244	2.66154e-242
mesenchyme	TCF4	35.6889	4.78116	2.71092e-219	1.05424e-217
mesenchyme	HOXB-AS1	35.5629	8.36021	1.98186e-215	7.52102e-214
mesenchyme	MAP3K7CL	35.5566	6.1026	5.45256e-216	2.07925e-214
mesenchyme	GJA4	35.5023	6.40586	1.62612e-215	6.18595e-214
mesenchyme	PDLIM7	35.3644	5.38636	4.58479e-215	1.7357e-213
mesenchyme	ZEB2	35.1578	6.02154	1.39882e-212	5.2078e-211
mesenchyme	TIMP1	35.1536	2.80999	1.19777e-222	4.82516e-221
mesenchyme	PTP4A3	35.1408	5.49336	6.64913e-213	2.48725e-211
mesenchyme	NEXN	35.1222	7.97781	3.16211e-211	1.16894e-209
mesenchyme	TBX2-AS1	34.787	7.24276	2.87778e-208	1.05146e-206
mesenchyme	GADD45B	34.1747	1.95896	1.00884e-218	3.9039e-217
mesenchyme	PTN	34.1631	6.30142	9.8058e-203	3.4855e-201
mesenchyme	ADAMTS1	33.7784	3.5712	1.49252e-203	5.32933e-202
mesenchyme	CALM2	33.1361	1.31152	9.23177e-218	3.55491e-216
mesenchyme	FXYD6	33.1272	5.40076	1.0816e-193	3.67813e-192
mesenchyme	FILIP1	33.0659	7.08143	4.05415e-192	1.36684e-190
mesenchyme	ID1	32.7442	2.95701	5.91584e-196	2.03378e-194
mesenchyme	LMOD1	32.7377	7.22497	4.54973e-189	1.50803e-187
mesenchyme	BST2	32.7161	2.1723	2.57962e-200	9.04653e-199
mesenchyme	HCFC1R1	32.2971	2.37943	7.40279e-195	2.52837e-193
mesenchyme	MTHFD2	32.2461	5.88447	4.58065e-185	1.47171e-183
mesenchyme	AXL	31.9916	6.85622	3.50509e-182	1.10802e-180
mesenchyme	PPP1R12A	31.9495	2.65757	1.30317e-188	4.29225e-187
mesenchyme	TBX2	31.9428	6.97186	6.98452e-182	2.19907e-180
mesenchyme	TSC22D3	31.7671	2.53933	2.50061e-188	8.2019e-187
mesenchyme	RPL37A	31.683	0.706379	5.86415e-198	2.03381e-196
mesenchyme	ARID5B	31.6156	2.92002	4.35934e-185	1.40348e-183
mesenchyme	SYNPO2	31.6	7.82066	2.36322e-178	7.33767e-177
mesenchyme	EMP3	31.4542	4.50602	5.76852e-179	1.79464e-177
mesenchyme	TSC22D1	31.3603	2.03639	1.8721e-186	6.08956e-185
mesenchyme	COL1A2	31.357	8.62718	5.07484e-176	1.56335e-174
mesenchyme	ANXA6	31.3429	2.85255	5.06222e-181	1.58431e-179
mesenchyme	PLAT	31.2842	6.1585	6.20738e-176	1.9085e-174
mesenchyme	ARPC1A	31.2108	2.20101	5.19382e-183	1.65517e-181
mesenchyme	RPLP1	31.1808	0.622719	8.12677e-191	2.71659e-189
mesenchyme	SOCS3	31.137	3.38987	6.6867e-178	2.06801e-176
mesenchyme	MSRB3	31.0969	4.61976	2.31344e-175	7.08508e-174
mesenchyme	PLA2G5	30.8696	6.60747	5.2452e-172	1.56966e-170
mesenchyme	AEBP1	30.8297	7.28735	1.64962e-171	4.90855e-170
mesenchyme	YBX1	30.7768	1.31696	1.36587e-185	4.40641e-184
mesenchyme	HSPB6	30.7633	7.4453	8.52277e-171	2.53121e-169
mesenchyme	NDN	30.5862	3.56221	1.55351e-172	4.67572e-171
mesenchyme	SGCA	30.5516	7.76448	8.946e-169	2.60762e-167
mesenchyme	RPL23A	30.4171	0.791476	4.31374e-184	1.38313e-182
mesenchyme	PKIG	30.3742	2.6876	9.66611e-173	2.91486e-171
mesenchyme	CRIP2	30.3592	2.02526	5.05758e-178	1.56725e-176
mesenchyme	HES4	30.2882	2.41614	4.57836e-175	1.39671e-173
mesenchyme	PPP1R12B	30.0655	3.58091	3.71725e-167	1.06963e-165
mesenchyme	CNN1	29.8511	5.28465	2.42465e-163	6.81461e-162
mesenchyme	KANK2	29.8021	2.81852	4.52487e-167	1.29964e-165
mesenchyme	TCF21	29.6955	7.5548	3.54311e-161	9.85236e-160
mesenchyme	NRGN	29.6253	6.30947	8.95724e-161	2.48196e-159
mesenchyme	RHOC	29.4518	1.94521	8.17925e-168	2.37092e-166
mesenchyme	SERPINH1	29.4113	3.22526	4.12243e-162	1.15245e-160
mesenchyme	EPAS1	29.3535	2.45495	1.2011e-162	3.36373e-161
mesenchyme	WFDC1	29.2816	7.17187	1.9716e-157	5.295e-156
mesenchyme	SNCG	29.2782	6.14885	1.20355e-157	3.24898e-156
mesenchyme	FOXS1	29.1973	9.86089	1.87023e-156	4.96338e-155
mesenchyme	COL1A1	29.1765	6.69446	1.66314e-156	4.42125e-155
mesenchyme	ESAM	29.1525	5.28401	6.36856e-157	1.69587e-155
mesenchyme	SERPINI1	29.0763	5.61769	5.05501e-156	1.33031e-154
mesenchyme	IGFBP6	29.0166	4.85619	7.24076e-156	1.90234e-154
mesenchyme	COL3A1	28.9692	9.0957	1.8632e-154	4.82253e-153
mesenchyme	HOXB2	28.8626	7.06674	9.33014e-154	2.39911e-152
mesenchyme	BCAM	28.845	2.35343	6.82334e-160	1.87088e-158
mesenchyme	RPS4Y1	28.8053	2.40333	8.30902e-163	2.33113e-161
mesenchyme	FABP5	28.7633	3.78942	5.8648e-155	1.52553e-153
mesenchyme	CD63	28.7456	1.16476	8.98953e-166	2.5586e-164
mesenchyme	EHD2	28.5947	3.69331	1.01176e-153	2.59734e-152
mesenchyme	RPL10	28.5827	0.642239	1.56341e-165	4.4337e-164
mesenchyme	PALLD	28.4822	2.7843	4.51898e-155	1.18133e-153
mesenchyme	MCAM	28.414	2.88453	8.80246e-154	2.26714e-152
mesenchyme	NTRK2	28.3141	8.33999	9.85321e-149	2.46503e-147
mesenchyme	BSG	28.2853	1.78932	5.47595e-157	1.46563e-155
mesenchyme	IFITM1	28.1469	4.69889	5.31215e-148	1.32475e-146
mesenchyme	LMNA	28.1349	1.61128	6.51412e-159	1.77065e-157
mesenchyme	FHL2	27.8946	3.30173	1.1848e-147	2.94531e-146
mesenchyme	MXRA8	27.7547	8.06098	8.23089e-144	2.01113e-142
mesenchyme	PLN	27.71	6.41979	9.8051e-144	2.39205e-142
mesenchyme	RPS27	27.6478	0.672633	5.88664e-157	1.57287e-155
mesenchyme	GAPDH	27.5589	0.974625	1.02274e-152	2.60849e-151
mesenchyme	SLC2A3	27.5335	4.50321	4.92569e-143	1.1961e-141
mesenchyme	IFITM3	27.517	1.16928	4.40737e-151	1.11504e-149
mesenchyme	C1orf54	27.4994	5.41743	3.0488e-142	7.32411e-141
mesenchyme	EMILIN1	27.3744	7.73722	1.67175e-140	3.94961e-139
mesenchyme	ACTN1	27.3011	2.15249	1.62619e-145	3.99829e-144
mesenchyme	C1QTNF1	27.2231	4.80982	3.76686e-140	8.87272e-139
mesenchyme	PMP22	27.1814	4.45069	5.0392e-140	1.18342e-138
mesenchyme	CCDC80	27.0741	5.98562	2.50093e-138	5.82106e-137
mesenchyme	KLHL23	27.0444	3.4492	1.56087e-139	3.65467e-138
mesenchyme	EID1	27.0047	1.39308	1.30932e-145	3.22425e-144
mesenchyme	RPL35A	26.7941	0.697668	2.33351e-147	5.79174e-146
mesenchyme	ZNF90	26.7917	2.05443	4.98822e-143	1.20941e-141
mesenchyme	ANXA1	26.7804	3.6594	1.4871e-137	3.43586e-136
mesenchyme	SPRY1	26.7743	3.29895	1.24076e-137	2.87092e-136
mesenchyme	CRTAP	26.5113	2.87598	7.88072e-136	1.79701e-134
mesenchyme	EBF1	26.3359	7.11703	1.0913e-131	2.40806e-130
mesenchyme	LRRC32	26.2754	6.72373	3.56121e-131	7.83616e-130
mesenchyme	GAS6	26.1996	2.4041	1.11815e-134	2.52403e-133
mesenchyme	NES	26.192	7.3137	1.88237e-130	4.11321e-129
mesenchyme	MGST3	26.0497	1.28882	1.89072e-136	4.33019e-135
mesenchyme	CFL1	26.0455	1.17833	1.54356e-138	3.60339e-137
mesenchyme	NTF3	26.0164	6.17401	4.1639e-129	8.9615e-128
mesenchyme	TLN1	25.9956	2.22592	7.18386e-133	1.60548e-131
mesenchyme	TMEM204	25.96	5.99679	1.18522e-128	2.53002e-127
mesenchyme	HSPB2	25.9119	6.74808	3.67762e-128	7.81856e-127
mesenchyme	PDLIM2	25.8811	2.69227	2.87102e-130	6.24746e-129
mesenchyme	S100A4	25.8486	3.15194	5.55328e-130	1.20674e-128
mesenchyme	ATP1B3	25.8311	3.77353	8.6182e-129	1.84721e-127
mesenchyme	AK1	25.7511	2.37827	1.05546e-129	2.29039e-128
mesenchyme	UBA2	25.5378	2.27565	2.52123e-128	5.36734e-127
mesenchyme	NT5DC2	25.528	5.2046	2.80747e-125	5.86545e-124
mesenchyme	EFHD1	25.4227	3.49197	6.01375e-125	1.25474e-123
mesenchyme	ENG	25.3664	4.37407	2.62531e-124	5.45585e-123
mesenchyme	KCNK17	25.1337	7.5698	1.84542e-121	3.70759e-120
mesenchyme	FHL1	25.0617	4.81794	2.48821e-121	4.97991e-120
mesenchyme	RPL36A	25.0206	1.12423	4.43424e-129	9.53028e-128
mesenchyme	RERG	25.0096	4.21943	2.03215e-121	4.07755e-120
mesenchyme	RPL7	24.9712	0.720191	1.1918e-129	2.57912e-128
mesenchyme	FOS	24.9105	1.40098	3.45478e-129	7.45578e-128
mesenchyme	MDK	24.8144	2.56366	5.28735e-122	1.06911e-120
mesenchyme	CPE	24.8005	2.16086	1.64935e-122	3.3566e-121
mesenchyme	ZFP36	24.7565	1.46426	3.25599e-126	6.85721e-125
mesenchyme	RAB34	24.7312	3.18973	2.40677e-120	4.79858e-119
mesenchyme	MAFB	24.7295	3.33475	2.28739e-119	4.54901e-118
mesenchyme	TNS1	24.4358	2.24747	6.69834e-119	1.33044e-117
mesenchyme	ITGA7	24.2494	5.97249	2.4246e-114	4.64548e-113
mesenchyme	SMTN	24.2376	3.54769	2.51882e-115	4.86156e-114
mesenchyme	EDNRA	24.1617	7.98515	1.84795e-113	3.52344e-112
mesenchyme	RBPMS2	24.1308	5.01946	1.60051e-113	3.05536e-112
mesenchyme	PRELP	24.0584	8.32216	1.31684e-112	2.49264e-111
mesenchyme	DKK3	24.0154	6.76219	2.42794e-112	4.57378e-111
mesenchyme	ADAMTS4	24.0123	5.29478	1.37933e-112	2.60778e-111
mesenchyme	NFASC	24.0067	5.43444	1.31415e-112	2.49055e-111
mesenchyme	YBX3	23.9288	1.7802	3.84407e-116	7.50239e-115
mesenchyme	PDE1A	23.8622	9.14726	5.14242e-111	9.62962e-110
mesenchyme	ANTXR1	23.6921	7.76807	1.15671e-109	2.14304e-108
mesenchyme	SCPEP1	23.617	3.02309	8.93256e-111	1.67071e-109
mesenchyme	DMPK	23.5787	4.50515	2.60185e-109	4.80914e-108
mesenchyme	ANGPTL4	23.5544	2.11169	4.04525e-111	7.58412e-110
mesenchyme	LGI4	23.4936	6.25516	3.67948e-108	6.72972e-107
mesenchyme	AOC3	23.492	6.47548	3.99888e-108	7.30539e-107
mesenchyme	ITM2B	23.4779	1.02617	3.24414e-113	6.17802e-112
mesenchyme	HAND2	23.3442	9.63249	8.06654e-107	1.46175e-105
mesenchyme	NAP1L1	23.3063	1.30311	8.73344e-112	1.64128e-110
mesenchyme	GRK5	23.2269	5.95341	4.60514e-106	8.27819e-105
mesenchyme	FAM162B	23.2196	7.02547	6.18926e-106	1.11004e-104
mesenchyme	NR4A2	23.1865	3.16209	3.80505e-107	6.90314e-106
mesenchyme	NET1	23.1499	2.21551	1.66266e-107	3.0269e-106
mesenchyme	RRAS	23.1358	3.09495	1.3195e-106	2.38283e-105
mesenchyme	NGF	23.0462	7.88795	1.75235e-104	3.09338e-103
mesenchyme	RPL21	22.9463	0.594106	4.16775e-110	7.77667e-109
mesenchyme	HOXB4	22.8745	7.26609	3.68018e-103	6.43868e-102
mesenchyme	RPL13A	22.8513	0.534553	1.17569e-108	2.15534e-107
mesenchyme	OAT	22.8378	2.07726	2.09807e-105	3.74153e-104
mesenchyme	RASL11A	22.7857	6.53535	1.78229e-102	3.08388e-101
mesenchyme	OLFML3	22.5606	8.59181	1.26018e-100	2.14737e-99
mesenchyme	RPL6	22.5494	0.710242	3.38096e-107	6.14083e-106
mesenchyme	RGS2	22.5451	3.52912	1.43388e-101	2.46744e-100
mesenchyme	PKM	22.5163	1.71855	4.22323e-104	7.43014e-103
mesenchyme	RPL17	22.5155	1.25325	6.36485e-106	1.14023e-104
mesenchyme	C12orf57	22.5061	1.09304	6.21211e-105	1.10156e-103
mesenchyme	AP2M1	22.4962	1.43197	4.19372e-104	7.3865e-103
mesenchyme	CXCL12	22.4837	3.88357	1.21341e-100	2.0699e-99
mesenchyme	PLPP1	22.4334	2.31826	1.54742e-101	2.6599e-100
mesenchyme	ARID5A	22.418	3.06019	1.05661e-100	1.80439e-99
mesenchyme	EDNRB	22.3794	5.80995	2.11911e-99	3.55698e-98
mesenchyme	GPBAR1	22.3451	6.49694	4.75207e-99	7.93409e-98
mesenchyme	CRYAB	22.3349	1.64722	2.24372e-103	3.93427e-102
mesenchyme	TNS2	22.3111	2.78967	4.98083e-100	8.43253e-99
mesenchyme	MRGPRF	22.237	4.67057	1.72976e-98	2.86367e-97
mesenchyme	COL14A1	22.2333	9.03642	4.51726e-98	7.44708e-97
mesenchyme	PDGFA	22.1327	2.80081	7.85095e-99	1.30663e-97
mesenchyme	RRAD	22.0727	4.93825	2.91991e-97	4.76868e-96
mesenchyme	CDKN1A	22.0261	1.94836	6.11105e-99	1.01922e-97
mesenchyme	PHLDA2	21.9127	2.12362	3.6571e-98	6.03536e-97
mesenchyme	CD151	21.8911	1.3647	1.79942e-99	3.02684e-98
mesenchyme	PTK2	21.8871	2.26526	1.69426e-97	2.77855e-96
mesenchyme	HRC	21.8757	7.26942	2.23979e-95	3.60546e-94
mesenchyme	CST3	21.8579	1.03974	6.51788e-99	1.08592e-97
mesenchyme	PHLDA1	21.8398	1.95853	1.98049e-97	3.24457e-96
mesenchyme	LDHB	21.7818	1.34137	2.56967e-99	4.29947e-98
mesenchyme	EPS8	21.7605	1.88769	7.20495e-97	1.17181e-95
mesenchyme	RCSD1	21.7448	5.45422	1.47853e-94	2.36068e-93
mesenchyme	MIF	21.6576	1.20695	1.44401e-98	2.39313e-97
mesenchyme	SLIT3	21.6446	4.24872	4.2824e-94	6.8167e-93
mesenchyme	RPS7	21.6004	0.592033	9.49212e-99	1.5781e-97
mesenchyme	PRKG1	21.576	6.34724	4.06023e-93	6.35994e-92
mesenchyme	NPDC1	21.5048	3.13167	1.00441e-93	1.59236e-92
mesenchyme	COL6A3	21.471	3.09762	1.30682e-93	2.06346e-92
mesenchyme	SMIM10	21.4388	4.82248	2.56824e-92	3.99501e-91
mesenchyme	BTG2	21.4367	1.92166	1.06609e-94	1.7039e-93
mesenchyme	C1QTNF2	21.4187	7.06547	6.73245e-92	1.04416e-90
mesenchyme	PLTP	21.4124	5.30682	5.62406e-92	8.73119e-91
mesenchyme	CLEC11A	21.3642	2.79484	1.09068e-92	1.70334e-91
mesenchyme	ARPC1B	21.3024	1.71282	1.54836e-93	2.43994e-92
mesenchyme	AKAP12	21.2644	3.27189	7.79966e-92	1.2073e-90
mesenchyme	NBL1	21.2565	4.81702	6.10859e-91	9.40903e-90
mesenchyme	THY1	21.1835	8.77904	4.79085e-90	7.32902e-89
mesenchyme	FKBP10	21.1763	4.90131	2.40106e-90	3.68749e-89
mesenchyme	DYNLL1	21.1747	1.02646	4.88499e-94	7.76017e-93
mesenchyme	RPS6	21.1731	0.566999	1.69817e-95	2.7364e-94
mesenchyme	NEURL1B	21.1658	6.54415	5.1e-90	7.79438e-89
mesenchyme	CALHM2	21.0989	6.01243	1.38941e-89	2.10298e-88
mesenchyme	RPLP2	21.0822	0.546607	1.30481e-93	2.06236e-92
mesenchyme	CIRBP	21.0395	1.03782	1.15541e-93	1.8299e-92
mesenchyme	HEY2	21.0032	3.71583	3.28524e-89	4.92975e-88
mesenchyme	HOTAIRM1	20.9521	5.74409	1.81406e-88	2.69893e-87
mesenchyme	LTBP4	20.924	3.11475	4.20861e-89	6.30329e-88
mesenchyme	MYLIP	20.8646	2.16654	7.74115e-90	1.1785e-88
mesenchyme	CCL2	20.8357	2.67809	4.37369e-89	6.54429e-88
mesenchyme	PROCR	20.8332	5.30082	1.10165e-87	1.62822e-86
mesenchyme	ITM2C	20.8296	2.08669	2.84823e-89	4.29037e-88
mesenchyme	ASPN	20.8054	6.96369	2.91752e-87	4.28384e-86
mesenchyme	LTBP1	20.7605	4.28951	3.41198e-87	5.0052e-86
mesenchyme	MAGED2	20.7348	1.66937	3.2008e-89	4.80762e-88
mesenchyme	HIGD1B	20.7258	5.53941	8.9221e-87	1.30517e-85
mesenchyme	LUM	20.7164	6.92687	1.39018e-86	2.02796e-85
mesenchyme	KCNMB1	20.678	5.76679	1.90671e-86	2.77631e-85
mesenchyme	CCNI	20.6637	1.1112	1.54955e-89	2.34311e-88
mesenchyme	FXYD5	20.6403	3.19565	5.16042e-87	7.55595e-86
mesenchyme	RPL32	20.6056	0.474056	2.03247e-90	3.12448e-89
mesenchyme	ENPEP	20.5647	3.07069	5.48753e-86	7.96807e-85
mesenchyme	ST6GALNAC6	20.5475	2.62478	1.4888e-86	2.16981e-85
mesenchyme	PLEKHO1	20.5167	5.11793	2.72985e-85	3.90607e-84
mesenchyme	RPS8	20.5049	0.570233	1.35946e-89	2.05964e-88
mesenchyme	RASL12	20.4962	6.9694	5.537e-85	7.90835e-84
mesenchyme	HEYL	20.4298	7.42324	1.80819e-84	2.57323e-83
mesenchyme	FTH1	20.4059	0.459048	6.85996e-88	1.01772e-86
mesenchyme	ARHGEF25	20.4057	6.46814	2.33403e-84	3.31855e-83
mesenchyme	EFEMP2	20.3792	2.34906	1.15106e-85	1.65911e-84
mesenchyme	SYNE2	20.366	1.66271	2.95557e-86	4.29954e-85
mesenchyme	RPL18A	20.3406	0.580313	4.87616e-88	7.24096e-87
mesenchyme	ARL2	20.2742	1.75045	1.45192e-85	2.08702e-84
mesenchyme	PCOLCE	20.2641	2.81924	7.72874e-84	1.09098e-82
mesenchyme	CYB5R3	20.2534	1.32783	7.36855e-86	1.06698e-84
mesenchyme	RPL38	20.2389	0.576533	1.23297e-86	1.80195e-85
mesenchyme	PLS3	20.2219	1.76475	1.49626e-84	2.13126e-83
mesenchyme	SPECC1	20.1907	4.32955	4.88031e-83	6.83984e-82
mesenchyme	HSPA2	20.1727	3.64503	3.13614e-83	4.39927e-82
mesenchyme	SRPX	20.1578	6.32997	1.68806e-82	2.35324e-81
mesenchyme	ANGPT1	20.1353	6.14717	2.13039e-82	2.95938e-81
mesenchyme	RPL41	20.0707	0.40578	8.55646e-86	1.23671e-84
mesenchyme	ADGRA2	20.0605	5.87442	7.17382e-82	9.91274e-81
mesenchyme	MSN	19.9854	2.27053	1.68617e-82	2.3527e-81
mesenchyme	SYNM	19.952	5.49418	4.38416e-81	6.01043e-80
mesenchyme	RSU1	19.9509	2.10892	1.74861e-82	2.4355e-81
mesenchyme	CAP2	19.9043	3.32395	2.84619e-81	3.90879e-80
mesenchyme	ARHGAP15	19.8867	4.87237	9.18929e-81	1.2576e-79
mesenchyme	NR2F2-AS1	19.75	2.88233	1.89668e-80	2.5867e-79
mesenchyme	ZEB1	19.6547	3.55526	3.35765e-79	4.55544e-78
mesenchyme	COL4A2	19.6491	2.14268	3.55013e-80	4.8291e-79
mesenchyme	GUK1	19.6416	1.00106	2.34728e-81	3.22926e-80
mesenchyme	HAND2-AS1	19.6001	5.6081	1.3642e-78	1.83659e-77
mesenchyme	RCN3	19.5435	5.50884	4.07126e-78	5.43446e-77
mesenchyme	ARHGEF17	19.4809	3.6526	4.29673e-78	5.73056e-77
mesenchyme	ROCK1	19.4502	1.66574	3.85182e-79	5.21689e-78
mesenchyme	ADAP2	19.4421	6.62097	2.54237e-77	3.35093e-76
mesenchyme	HGF	19.4247	11.6478	3.8494e-77	5.06092e-76
mesenchyme	SLC8A1	19.4052	6.45065	4.19664e-77	5.50822e-76
mesenchyme	TBC1D1	19.3471	2.49384	1.55397e-77	2.05855e-76
mesenchyme	ZNF703	19.3255	4.61649	1.02785e-76	1.34684e-75
mesenchyme	GGT5	19.2958	7.74604	3.01646e-76	3.93945e-75
mesenchyme	RHOA	19.2849	1.08581	9.53947e-79	1.28537e-77
mesenchyme	FSTL1	19.2544	3.26768	1.95772e-76	2.55888e-75
mesenchyme	RPL27A	19.1799	0.508953	2.82325e-78	3.77498e-77
mesenchyme	ATP1B2	19.1594	5.36504	2.20132e-75	2.8465e-74
mesenchyme	ITGB1	19.0995	1.01633	1.61325e-77	2.13528e-76
mesenchyme	RASGRP2	19.0891	3.8825	3.55815e-75	4.59344e-74
mesenchyme	RPS25	19.0741	0.463827	7.41062e-78	9.85011e-77
mesenchyme	SYTL2	19.0456	5.50417	1.32553e-74	1.70281e-73
mesenchyme	STEAP4	19.0163	4.95872	1.90014e-74	2.435e-73
mesenchyme	NR2F2	18.9485	1.41895	6.34577e-76	8.25318e-75
mesenchyme	PFN1	18.8745	0.827856	9.08503e-76	1.1806e-74
mesenchyme	IFI27	18.8259	2.43105	4.4631e-74	5.70543e-73
mesenchyme	ARHGAP10	18.787	3.39502	4.67058e-73	5.88921e-72
mesenchyme	MSC	18.7159	8.20264	3.55212e-72	4.42565e-71
mesenchyme	ISLR	18.6811	7.98712	6.1634e-72	7.63067e-71
mesenchyme	MIR497HG	18.6705	4.88016	4.90815e-72	6.1103e-71
mesenchyme	MOB2	18.6623	2.27425	8.92518e-73	1.1191e-71
mesenchyme	TMEM165	18.6504	1.57678	1.56822e-73	1.99017e-72
mesenchyme	ZFYVE21	18.649	1.70005	3.35304e-73	4.2347e-72
mesenchyme	NTRK3	18.6441	7.6741	1.06264e-71	1.31148e-70
mesenchyme	HTRA1	18.581	2.44686	5.16522e-72	6.42015e-71
mesenchyme	HMGB2	18.5607	1.6725	6.40314e-73	8.06734e-72
mesenchyme	SRI	18.5595	1.46984	7.72615e-73	9.70308e-72
mesenchyme	FOXF1	18.5458	7.65399	5.13218e-71	6.28462e-70
mesenchyme	TNFSF12	18.521	2.7585	1.24624e-71	1.53446e-70
mesenchyme	RPL36	18.4805	0.521023	6.85298e-73	8.62718e-72
mesenchyme	RNH1	18.4649	1.2381	2.02565e-72	2.53182e-71
mesenchyme	CNRIP1	18.4486	6.35466	2.18663e-70	2.66105e-69
mesenchyme	FADS3	18.4057	2.43677	6.32622e-71	7.71671e-70
mesenchyme	SSPN	18.4006	2.47992	5.91226e-71	7.2286e-70
mesenchyme	SGCE	18.3764	2.25021	6.28191e-71	7.66862e-70
mesenchyme	ISG15	18.3434	1.79334	8.29652e-71	1.01122e-69
mesenchyme	TAGLN2	18.3288	1.15512	1.21704e-71	1.50086e-70
mesenchyme	ANGPTL2	18.3188	7.40119	1.88731e-69	2.27914e-68
mesenchyme	ACTG2	18.3112	7.03902	2.10954e-69	2.54555e-68
mesenchyme	CABP1	18.3051	9.47108	2.46211e-69	2.96643e-68
mesenchyme	DAAM2	18.2682	5.43968	3.06424e-69	3.68624e-68
mesenchyme	SMIM3	18.2197	3.67404	3.69737e-69	4.44109e-68
mesenchyme	TMSB10	18.2166	1.00043	5.59934e-72	6.94875e-71
mesenchyme	DPT	18.1793	7.207	1.68971e-68	2.01572e-67
mesenchyme	CCDC107	18.0938	1.46759	2.46158e-69	2.96643e-68
mesenchyme	CD44	18.0752	3.14931	2.14649e-68	2.55869e-67
mesenchyme	ECM1	18.0675	5.56078	8.26198e-68	9.7744e-67
mesenchyme	IFI27L2	18.0667	1.86812	3.97715e-69	4.7735e-68
mesenchyme	FILIP1L	17.9639	1.64406	1.20697e-68	1.44094e-67
mesenchyme	KLF2	17.9464	1.94728	4.00786e-68	4.75586e-67
mesenchyme	ATP1A2	17.8941	5.92255	1.2121e-66	1.41376e-65
mesenchyme	ITGB1BP1	17.8804	1.7346	8.77077e-68	1.03685e-66
mesenchyme	PIP4K2A	17.8692	2.8599	4.48607e-67	5.26761e-66
mesenchyme	S1PR3	17.8377	4.51274	2.16051e-66	2.51064e-65
mesenchyme	CCDC102B	17.828	4.39651	2.61801e-66	3.03554e-65
mesenchyme	IFI16	17.8147	1.81894	2.38916e-67	2.81169e-66
mesenchyme	DDR2	17.8062	4.00551	3.70914e-66	4.29118e-65
mesenchyme	COL12A1	17.7935	7.47178	6.66344e-66	7.68079e-65
mesenchyme	NPR3	17.7881	5.33603	6.42803e-66	7.41489e-65
mesenchyme	RPL10A	17.7736	0.57957	2.47159e-68	2.94175e-67
mesenchyme	COL5A2	17.7508	4.96548	1.07853e-65	1.24047e-64
mesenchyme	COL5A1	17.7183	6.19668	1.97959e-65	2.27017e-64
mesenchyme	RASD1	17.7136	1.83867	1.70512e-66	1.98439e-65
mesenchyme	CALM3	17.7	1.17909	6.36882e-67	7.46721e-66
mesenchyme	TUBB6	17.6541	1.90729	3.34233e-66	3.86967e-65
mesenchyme	TGFB3	17.6534	3.79837	2.86333e-65	3.27169e-64
mesenchyme	GSTP1	17.6405	0.956538	9.88557e-68	1.16776e-66
mesenchyme	EEF1D	17.6336	0.684921	8.52368e-67	9.96395e-66
mesenchyme	ZFHX3	17.5878	1.75823	1.41081e-65	1.61908e-64
mesenchyme	INPP4B	17.5552	5.08764	1.98385e-64	2.24879e-63
mesenchyme	HDDC2	17.5338	1.77221	2.39274e-65	2.73797e-64
mesenchyme	ITGA1	17.4959	1.90392	1.12291e-64	1.27472e-63
mesenchyme	LRRC17	17.4013	5.11015	2.05287e-63	2.30047e-62
mesenchyme	ZNF503	17.3399	2.43246	1.37959e-63	1.5493e-62
mesenchyme	CCND2	17.3375	4.26151	4.29637e-63	4.79405e-62
mesenchyme	GBP2	17.265	1.98296	2.31459e-63	2.59006e-62
mesenchyme	LDB3	17.2297	7.34693	3.63352e-62	4.01733e-61
mesenchyme	NR2F1	17.2277	4.75927	2.85394e-62	3.15984e-61
mesenchyme	FBLN1	17.1902	4.65304	5.54824e-62	6.12568e-61
mesenchyme	UBC	17.187	0.731863	4.71978e-64	5.32704e-63
mesenchyme	TMEM50A	17.1858	1.18796	1.99484e-63	2.23704e-62
mesenchyme	RPS3	17.1805	0.543124	3.77291e-64	4.26755e-63
mesenchyme	IGFBP4	17.1605	1.15428	5.03588e-63	5.61524e-62
mesenchyme	GLIPR2	17.1573	3.92663	5.62999e-62	6.21157e-61
mesenchyme	FBN1	17.1412	6.82705	1.32864e-61	1.45567e-60
mesenchyme	GJC1	17.1381	5.02424	1.07699e-61	1.18326e-60
mesenchyme	ATP2B4	17.1347	3.18889	6.01718e-62	6.6248e-61
mesenchyme	SERPINB6	17.1337	1.43272	7.09803e-63	7.90342e-62
mesenchyme	PLCE1	17.0984	3.47539	1.23135e-61	1.35002e-60
mesenchyme	OLFML1	17.0447	6.23792	5.66807e-61	6.1627e-60
mesenchyme	HOPX	16.9439	4.58989	1.9702e-60	2.13033e-59
mesenchyme	CAPZB	16.934	1.13371	1.13566e-61	1.24598e-60
mesenchyme	KLHDC8B	16.917	2.56502	1.06079e-60	1.15176e-59
mesenchyme	EVA1B	16.9093	4.01484	2.52114e-60	2.71858e-59
mesenchyme	TMEM47	16.8911	1.6344	5.19641e-61	5.6538e-60
mesenchyme	CYGB	16.8684	5.6155	7.31589e-60	7.84573e-59
mesenchyme	ILK	16.8612	1.20354	3.06735e-61	3.34428e-60
mesenchyme	MAP7D3	16.8573	2.71091	3.38825e-60	3.65108e-59
mesenchyme	MMP2	16.8366	9.24503	1.35304e-59	1.44315e-58
mesenchyme	NDUFA13	16.82	0.875622	4.50461e-61	4.9079e-60
mesenchyme	DDIT4	16.7843	1.44383	2.1243e-60	2.29538e-59
mesenchyme	RPS15	16.7776	0.413768	4.74216e-61	5.16314e-60
mesenchyme	IER2	16.7638	0.977089	2.57638e-61	2.81289e-60
mesenchyme	EPB41L2	16.7597	2.12828	6.97506e-60	7.48533e-59
mesenchyme	NRIP2	16.7567	5.36333	3.29663e-59	3.50428e-58
mesenchyme	CACNA1C	16.7538	7.27396	4.21821e-59	4.47181e-58
mesenchyme	TMEM51	16.7496	1.98003	7.46592e-60	8.00116e-59
mesenchyme	FABP3	16.7053	5.65948	8.1272e-59	8.58108e-58
mesenchyme	CLEC2B	16.7002	3.03938	3.89304e-59	4.13267e-58
mesenchyme	CBX6	16.6878	1.60331	8.76919e-60	9.38507e-59
mesenchyme	LGALS3BP	16.6521	1.22044	9.34562e-60	9.99517e-59
mesenchyme	TSPYL2	16.6245	2.15928	5.50581e-59	5.8172e-58
mesenchyme	MEG3	16.6225	5.0342	2.57565e-58	2.69954e-57
mesenchyme	MAP1LC3A	16.6192	1.27399	2.46866e-59	2.62594e-58
mesenchyme	RPS19	16.6071	0.446528	6.91961e-60	7.43089e-59
mesenchyme	PNMA1	16.5763	2.8372	2.10387e-58	2.20948e-57
mesenchyme	GLIPR1	16.5641	3.62349	3.8559e-58	4.03598e-57
mesenchyme	PFDN5	16.5319	0.624476	2.38715e-59	2.54095e-58
mesenchyme	ASAH1	16.5301	1.34609	8.46323e-59	8.92987e-58
mesenchyme	RPS3A	16.5263	0.52016	1.3512e-59	1.44217e-58
mesenchyme	UTRN	16.4996	1.82964	2.81826e-58	2.95184e-57
mesenchyme	IL33	16.4619	4.38078	2.28686e-57	2.37468e-56
mesenchyme	GYG1	16.447	2.34699	1.05419e-57	1.1005e-56
mesenchyme	CLIC1	16.4396	0.981109	9.12188e-59	9.61838e-58
mesenchyme	CDKN2C	16.4321	3.03987	1.84343e-57	1.91676e-56
mesenchyme	TCEAL3	16.4029	1.94869	1.07449e-57	1.12093e-56
mesenchyme	CYBRD1	16.3903	2.6713	3.0569e-57	3.17009e-56
mesenchyme	CTSK	16.3749	5.95237	1.10173e-56	1.13802e-55
mesenchyme	NHSL2	16.3693	1.69196	1.16419e-57	1.2129e-56
mesenchyme	ADCY3	16.3623	6.30965	1.29263e-56	1.33345e-55
mesenchyme	FHL3	16.3596	3.512	7.28623e-57	7.53614e-56
mesenchyme	PHLDA3	16.3066	3.24954	1.35376e-56	1.3956e-55
mesenchyme	ACTA2-AS1	16.3025	5.63454	2.73272e-56	2.8098e-55
mesenchyme	MAPRE2	16.2971	2.12135	9.06978e-57	9.3747e-56
mesenchyme	KCNE4	16.2806	6.47187	4.17998e-56	4.28107e-55
mesenchyme	PTH1R	16.2774	6.31499	4.33035e-56	4.43219e-55
mesenchyme	HES1	16.2598	1.07263	1.18219e-57	1.23084e-56
mesenchyme	THBS2	16.2486	27.7008	7.30159e-56	7.45388e-55
mesenchyme	CCDC146	16.2421	3.70547	4.72447e-56	4.83243e-55
mesenchyme	ELN	16.2337	4.13285	6.77337e-56	6.92364e-55
mesenchyme	TTLL7	16.2222	2.1649	2.28717e-56	2.35322e-55
mesenchyme	INAFM1	16.1991	2.19811	4.02656e-56	4.12663e-55
mesenchyme	ZNF331	16.1767	2.66897	8.17471e-56	8.33438e-55
mesenchyme	ADGRE5	16.1404	2.66536	1.0039e-55	1.02218e-54
mesenchyme	PDGFRA	16.135	6.73193	3.59824e-55	3.63783e-54
mesenchyme	LINC00924	16.1275	5.44621	3.45581e-55	3.49609e-54
mesenchyme	ISCU	16.1258	0.968896	2.11173e-56	2.17414e-55
mesenchyme	PHPT1	16.0944	0.977125	3.78845e-56	3.88514e-55
mesenchyme	DEGS1	16.0764	2.00035	1.67092e-55	1.69367e-54
mesenchyme	SERPINE2	16.064	3.4983	5.10671e-55	5.14304e-54
mesenchyme	BNIP3L	16.0592	1.46073	1.15109e-55	1.17129e-54
mesenchyme	MYOCD	16.0502	7.3804	1.18594e-54	1.1898e-53
mesenchyme	QSOX1	16.0283	2.09117	3.68543e-55	3.72359e-54
mesenchyme	MT2A	15.9816	0.959862	3.05444e-56	3.13444e-55
mesenchyme	SLCO3A1	15.9689	1.81097	6.42951e-55	6.47111e-54
mesenchyme	ERH	15.9674	0.848597	1.65021e-55	1.67375e-54
mesenchyme	TCEAL7	15.908	27.3712	9.49591e-54	9.42453e-53
mesenchyme	CTHRC1	15.8938	7.96806	1.14274e-53	1.132e-52
mesenchyme	LIMS1	15.8834	1.53579	1.85677e-54	1.85807e-53
mesenchyme	ENTPD1	15.8297	4.64538	2.04401e-53	2.01717e-52
mesenchyme	ABTB1	15.7845	2.13808	1.28137e-53	1.26773e-52
mesenchyme	TGFB1	15.7569	3.80634	4.69163e-53	4.60977e-52
mesenchyme	C1QTNF7	15.723	6.96429	1.19511e-52	1.16914e-51
mesenchyme	DACT3	15.7154	4.37127	9.65526e-53	9.46312e-52
mesenchyme	PSIP1	15.6938	1.60114	2.99512e-53	2.95024e-52
mesenchyme	RABAC1	15.5731	0.884024	7.45728e-53	7.31801e-52
mesenchyme	RPL31	15.5726	0.46147	3.36383e-53	3.31135e-52
mesenchyme	MMP23B	15.5659	4.61105	9.12026e-52	8.86137e-51
mesenchyme	PCDH9	15.5455	3.44446	1.02713e-51	9.96738e-51
mesenchyme	PARM1	15.5346	6.39039	1.63347e-51	1.57541e-50
mesenchyme	PPP1R15A	15.5308	0.990066	7.91646e-53	7.76377e-52
mesenchyme	RAB31	15.5274	4.57084	1.53851e-51	1.48565e-50
mesenchyme	PDE3A	15.5163	3.98138	1.5001e-51	1.45034e-50
mesenchyme	MSC-AS1	15.4808	7.60599	3.64056e-51	3.48549e-50
mesenchyme	TWSG1	15.4474	3.23047	3.57526e-51	3.42505e-50
mesenchyme	PRAF2	15.4437	2.7885	2.61585e-51	2.51054e-50
mesenchyme	AP3M2	15.4261	3.33866	4.51628e-51	4.31077e-50
mesenchyme	MYC	15.4159	1.3514	1.45637e-51	1.40893e-50
mesenchyme	DGKG	15.4156	5.35979	8.0443e-51	7.65964e-50
mesenchyme	BCAP29	15.415	1.45626	1.56186e-51	1.50727e-50
mesenchyme	LGALS3	15.3596	1.07132	1.22784e-51	1.19004e-50
mesenchyme	RBMS1	15.3524	1.60419	4.74541e-51	4.52672e-50
mesenchyme	CDH11	15.3503	9.38376	2.30302e-50	2.17575e-49
mesenchyme	CAMK2G	15.3424	2.45775	1.02451e-50	9.74932e-50
mesenchyme	HLA-A	15.316	0.82618	1.29101e-51	1.25049e-50
mesenchyme	SH3KBP1	15.3075	2.48096	1.84065e-50	1.74417e-49
mesenchyme	TMEM38B	15.296	2.0738	1.75401e-50	1.66308e-49
mesenchyme	RPS27A	15.2747	0.382233	2.27906e-51	2.19133e-50
mesenchyme	CLIC4	15.2695	1.73599	2.02385e-50	1.91431e-49
mesenchyme	TIMP2	15.252	1.6757	1.73272e-50	1.64389e-49
mesenchyme	ANGPT2	15.2198	3.51274	7.98668e-50	7.48679e-49
mesenchyme	FUS	15.1585	0.897502	1.91719e-50	1.81561e-49
mesenchyme	HLX	15.0928	3.05126	5.02877e-49	4.68051e-48
mesenchyme	CSPG4	15.0796	6.47951	8.89241e-49	8.2424e-48
mesenchyme	SRP14	15.0795	0.582305	5.38454e-50	5.0596e-49
mesenchyme	PRSS23	15.0756	2.08038	3.01351e-49	2.80981e-48
mesenchyme	RUNX1T1	15.0736	6.10636	9.29444e-49	8.60996e-48
mesenchyme	RPL8	15.0701	0.451313	4.27558e-50	4.02238e-49
mesenchyme	ARL6IP5	15.0688	1.09675	1.24584e-49	1.16577e-48
mesenchyme	CNBP	15.0625	0.836781	1.0335e-49	9.68239e-49
mesenchyme	CD248	15.0624	6.40506	1.0848e-48	1.00373e-47
mesenchyme	A4GALT	15.0562	3.10561	6.84458e-49	6.36303e-48
mesenchyme	PRMT1	15.0265	1.19311	2.37962e-49	2.22272e-48
mesenchyme	CAMK1	15.0236	1.83315	5.97755e-49	5.56029e-48
mesenchyme	TIPIN	15.0105	1.71491	4.34702e-49	4.04838e-48
mesenchyme	MORF4L1	14.9896	0.754766	2.4963e-49	2.33032e-48
mesenchyme	PTGDS	14.9709	4.67214	3.49782e-48	3.2137e-47
mesenchyme	MIR22HG	14.9389	1.78852	1.61736e-48	1.49384e-47
mesenchyme	VCAM1	14.9359	4.18303	5.13138e-48	4.70631e-47
mesenchyme	PELO	14.9153	1.88372	2.75478e-48	2.53546e-47
mesenchyme	SBDS	14.912	0.866894	7.44292e-49	6.9111e-48
mesenchyme	NUDT4	14.9099	1.18709	1.5602e-48	1.4419e-47
mesenchyme	GNAS	14.9061	0.881134	1.03078e-48	9.54307e-48
mesenchyme	S100A11	14.8689	0.941379	8.13102e-49	7.54556e-48
mesenchyme	INMT	14.8582	4.84402	1.59952e-47	1.45597e-46
mesenchyme	HSPB7	14.8576	9.4163	1.88957e-47	1.71701e-46
mesenchyme	DRAP1	14.8477	0.976527	2.74286e-48	2.52597e-47
mesenchyme	FKBP7	14.8245	2.70195	1.54391e-47	1.40616e-46
mesenchyme	VAMP2	14.7969	0.883938	3.87334e-48	3.55663e-47
mesenchyme	HK1	14.7911	3.81002	3.13422e-47	2.8365e-46
mesenchyme	ITGA8	14.7897	5.3078	4.18646e-47	3.76925e-46
mesenchyme	VASN	14.7787	1.71324	1.36634e-47	1.24516e-46
mesenchyme	CPED1	14.7555	2.20095	3.71949e-47	3.35652e-46
mesenchyme	LAMA4	14.7374	3.63339	7.24056e-47	6.50037e-46
mesenchyme	YWHAQ	14.7332	0.914815	1.17252e-47	1.0704e-46
mesenchyme	LOXL1	14.7252	4.29784	8.48464e-47	7.61292e-46
mesenchyme	RPL35	14.7241	0.376831	9.60331e-48	8.77195e-47
mesenchyme	GPX8	14.7226	6.25087	1.096e-46	9.81159e-46
mesenchyme	HSPA1B	14.7219	1.24456	1.34208e-47	1.22376e-46
mesenchyme	KLF4	14.7185	2.0845	3.92649e-47	3.54128e-46
mesenchyme	GNB4	14.7102	3.96643	1.00361e-46	8.98955e-46
mesenchyme	LIMS2	14.6962	2.73223	9.26026e-47	8.3041e-46
mesenchyme	HNRNPA1	14.6845	0.70448	9.4898e-48	8.67331e-47
mesenchyme	FAU	14.6247	0.389678	4.14255e-47	3.734e-46
mesenchyme	ARHGAP1	14.5916	1.97071	2.37675e-46	2.11767e-45
mesenchyme	ARHGAP6	14.5702	7.52731	8.4533e-46	7.49068e-45
mesenchyme	MAGEH1	14.555	1.83678	3.19317e-46	2.84077e-45
mesenchyme	REM1	14.5426	7.42504	1.21298e-45	1.07183e-44
mesenchyme	PBXIP1	14.5277	1.66376	4.01169e-46	3.5629e-45
mesenchyme	PPP1CB	14.5104	1.06165	3.23179e-46	2.87349e-45
mesenchyme	HLA-B	14.4796	0.752372	2.05691e-46	1.8351e-45
mesenchyme	MXRA7	14.4764	2.99508	1.79253e-45	1.5795e-44
mesenchyme	MPRIP	14.4296	1.65299	1.6557e-45	1.46057e-44
mesenchyme	RBP1	14.4288	1.15751	8.61927e-46	7.62915e-45
mesenchyme	TMEM109	14.4078	1.57627	1.87598e-45	1.6521e-44
mesenchyme	NUTF2	14.3905	1.44948	1.97798e-45	1.74096e-44
mesenchyme	FEZ1	14.3477	4.05446	1.1775e-44	1.0289e-43
mesenchyme	FKBP8	14.3475	0.898012	2.21721e-45	1.95042e-44
mesenchyme	SNAI2	14.3285	2.87135	1.15989e-44	1.01408e-43
mesenchyme	PAM	14.3221	4.94149	2.03231e-44	1.76993e-43
mesenchyme	HNRNPDL	14.3213	0.767537	2.35759e-45	2.07275e-44
mesenchyme	RPL5	14.3144	0.501079	1.70242e-45	1.50094e-44
mesenchyme	TRPV2	14.2892	5.18198	3.04138e-44	2.64287e-43
mesenchyme	RPL34	14.2718	0.33546	2.87752e-45	2.52704e-44
mesenchyme	SSTR2	14.2542	3.66158	3.75421e-44	3.25869e-43
mesenchyme	PLXND1	14.2439	3.41639	4.10184e-44	3.55847e-43
mesenchyme	MOK	14.2265	2.0706	2.89516e-44	2.51859e-43
mesenchyme	NRP1	14.2254	1.50179	2.02809e-44	1.76724e-43
mesenchyme	SKP1	14.1933	0.61284	1.31144e-44	1.14531e-43
mesenchyme	GLT8D2	14.1303	7.04503	2.67026e-43	2.28624e-42
mesenchyme	UACA	14.112	1.78269	1.23449e-43	1.06332e-42
mesenchyme	SMARCD3	14.0966	2.30044	1.92736e-43	1.65468e-42
mesenchyme	CAMTA1	14.0871	0.893396	9.46091e-44	8.16257e-43
mesenchyme	EFEMP1	14.0864	2.44153	2.56094e-43	2.19503e-42
mesenchyme	MAP1A	14.0722	5.98981	5.4493e-43	4.65294e-42
mesenchyme	SORBS3	14.047	1.60834	2.64283e-43	2.26398e-42
mesenchyme	EIF1AY	14.0258	2.09203	3.55647e-43	3.04169e-42
mesenchyme	HLA-C	14.0139	0.682195	1.46985e-43	1.26397e-42
mesenchyme	EPHA3	14.0091	7.01013	1.26043e-42	1.06695e-41
mesenchyme	FBLN5	13.9807	4.7671	1.65699e-42	1.39887e-41
mesenchyme	TBCB	13.9715	1.11643	4.35334e-43	3.72118e-42
mesenchyme	CABIN1	13.9676	2.47379	1.17178e-42	9.93512e-42
mesenchyme	RNF24	13.9674	2.59334	1.0889e-42	9.23742e-42
mesenchyme	TMOD1	13.9488	3.04281	2.02801e-42	1.70842e-41
mesenchyme	PIP5K1B	13.9455	7.46109	2.86359e-42	2.40202e-41
mesenchyme	WTIP	13.9373	2.39911	1.63752e-42	1.38392e-41
mesenchyme	UBE2E1	13.9144	1.3564	1.22199e-42	1.03497e-41
mesenchyme	DDAH2	13.9096	1.03548	8.22608e-43	6.99729e-42
mesenchyme	PHLDB1	13.9079	2.14452	1.9287e-42	1.62563e-41
mesenchyme	WASF2	13.9078	1.1963	1.08379e-42	9.199e-42
mesenchyme	CHURC1	13.8988	1.01029	1.27258e-42	1.07666e-41
mesenchyme	HLA-DRB1	13.8721	1.72778	2.64047e-42	2.21605e-41
mesenchyme	DCTN2	13.8501	1.16269	2.15769e-42	1.81475e-41
mesenchyme	RPS18	13.8197	0.335794	1.7494e-42	1.47609e-41
mesenchyme	FBXO32	13.8138	3.68313	1.21532e-41	1.00865e-40
mesenchyme	MED22	13.7942	2.22825	9.09334e-42	7.55103e-41
mesenchyme	PACSIN2	13.7926	1.51768	7.28336e-42	6.06085e-41
mesenchyme	BCAS3	13.7767	2.32071	1.30261e-41	1.07997e-40
mesenchyme	FBLN2	13.7743	6.78206	2.54933e-41	2.10692e-40
mesenchyme	RPL18	13.7513	0.406413	4.0337e-42	3.38172e-41
mesenchyme	RPL9	13.7431	0.419921	4.94752e-42	4.1368e-41
mesenchyme	CDH13	13.658	5.94576	1.03157e-40	8.48533e-40
mesenchyme	NACA2	13.6556	1.51753	2.9766e-41	2.45875e-40
mesenchyme	HLA-E	13.5721	0.888425	6.50886e-41	5.35957e-40
mesenchyme	LDB2	13.5643	3.77662	2.79652e-40	2.28715e-39
mesenchyme	SMYD4	13.5165	2.26364	3.12738e-40	2.55509e-39
mesenchyme	EMP1	13.5051	3.25473	5.37448e-40	4.37052e-39
mesenchyme	GPRC5C	13.4875	1.13699	3.27719e-40	2.67609e-39
mesenchyme	RPS21	13.4335	0.468001	3.30133e-40	2.6944e-39
mesenchyme	ST3GAL4	13.4265	2.48107	1.12505e-39	9.11114e-39
mesenchyme	FLYWCH2	13.4206	1.83159	7.94874e-40	6.44057e-39
mesenchyme	CERCAM	13.3984	3.04523	1.74372e-39	1.40779e-38
mesenchyme	PPARG	13.3965	3.36987	2.34939e-39	1.89386e-38
mesenchyme	WNT6	13.3364	7.65963	6.00497e-39	4.80612e-38
mesenchyme	PLXDC1	13.3359	6.78317	6.02942e-39	4.82323e-38
mesenchyme	COL4A1	13.3342	1.6401	2.49694e-39	2.01177e-38
mesenchyme	MRC2	13.3118	7.43999	8.26886e-39	6.58783e-38
mesenchyme	DTX3	13.3016	2.20192	4.56485e-39	3.66845e-38
mesenchyme	SCRG1	13.2983	4.93861	8.64171e-39	6.87442e-38
mesenchyme	PDE4C	13.2818	3.63615	8.56506e-39	6.82035e-38
mesenchyme	IDS	13.2764	1.47203	5.29437e-39	4.24604e-38
mesenchyme	VSTM4	13.2655	3.54429	1.15493e-38	9.15957e-38
mesenchyme	ARMCX1	13.2625	1.95311	6.54234e-39	5.22556e-38
mesenchyme	SKAP2	13.2617	2.37914	8.72511e-39	6.93726e-38
mesenchyme	DTWD1	13.2299	1.58256	8.63658e-39	6.87383e-38
mesenchyme	C3orf70	13.2063	7.64135	3.01221e-38	2.37217e-37
mesenchyme	SYNE1	13.2058	1.58286	1.25692e-38	9.9584e-38
mesenchyme	GPNMB	13.192	4.53782	3.28834e-38	2.58445e-37
mesenchyme	RPS24	13.18	0.392917	7.90642e-39	6.30227e-38
mesenchyme	DYNLT1	13.1756	0.851508	1.02005e-38	8.09799e-38
mesenchyme	DPYSL3	13.1645	6.9508	4.98309e-38	3.90276e-37
mesenchyme	RSRP1	13.1613	0.992665	1.26161e-38	9.99052e-38
mesenchyme	HEXIM1	13.1603	1.2028	1.7199e-38	1.35922e-37
mesenchyme	PPDPF	13.1589	0.670963	6.99857e-39	5.58712e-38
mesenchyme	CKB	13.1499	1.13395	1.68725e-38	1.33409e-37
mesenchyme	ARHGEF2	13.1483	2.25008	3.09675e-38	2.43753e-37
mesenchyme	PCDH18	13.1419	7.85292	6.52587e-38	5.09836e-37
mesenchyme	KLC1	13.1276	1.56133	3.29617e-38	2.58931e-37
mesenchyme	PLP2	13.123	1.08118	2.11429e-38	1.66839e-37
mesenchyme	COPS6	13.1211	0.898406	2.31856e-38	1.82774e-37
mesenchyme	TCEAL4	13.0994	0.876831	3.25892e-38	2.56389e-37
mesenchyme	CNN3	13.0304	0.802051	5.72357e-38	4.47824e-37
mesenchyme	ARL3	13.0227	1.13987	9.3224e-38	7.26509e-37
mesenchyme	HACD1	12.9944	1.92364	1.96305e-37	1.52681e-36
mesenchyme	MEOX2	12.9763	7.04332	4.85267e-37	3.76495e-36
mesenchyme	FOXC2	12.9419	7.18578	7.16715e-37	5.5306e-36
mesenchyme	SSBP2	12.899	1.81499	5.59822e-37	4.33696e-36
mesenchyme	MRAS	12.8814	3.50064	1.1078e-36	8.51498e-36
mesenchyme	PRMT9	12.8741	2.29751	9.97451e-37	7.67432e-36
mesenchyme	RBBP7	12.8702	1.11653	6.02888e-37	4.6637e-36
mesenchyme	LAMC3	12.8572	8.20153	2.06043e-36	1.57219e-35
mesenchyme	HOXB3	12.8492	5.57822	2.12472e-36	1.61967e-35
mesenchyme	MPG	12.8482	1.06823	8.49232e-37	6.54997e-36
mesenchyme	SCARA3	12.8396	5.05705	2.42044e-36	1.84332e-35
mesenchyme	VASP	12.8385	1.22096	8.90796e-37	6.85708e-36
mesenchyme	HMGN2	12.8381	0.700899	5.72362e-37	4.43193e-36
mesenchyme	ADAMTSL2	12.8313	4.95213	2.64468e-36	2.01116e-35
mesenchyme	CRTC3	12.8303	1.57005	1.2226e-36	9.38819e-36
mesenchyme	BLVRA	12.817	1.73482	1.49719e-36	1.14631e-35
mesenchyme	HLA-DPA1	12.8145	1.57548	1.3923e-36	1.06756e-35
mesenchyme	JCHAIN	12.8078	1.57138	1.33944e-36	1.02784e-35
mesenchyme	RPL15	12.8044	0.372492	5.87636e-37	4.54795e-36
mesenchyme	MAF1	12.7952	1.10198	1.48274e-36	1.13581e-35
mesenchyme	AKAP6	12.7893	3.52819	3.81438e-36	2.89366e-35
mesenchyme	EIF5A	12.7824	0.911163	1.54328e-36	1.18102e-35
mesenchyme	C4orf48	12.7821	2.00764	2.5712e-36	1.95623e-35
mesenchyme	FAM13C	12.7817	5.72989	4.87675e-36	3.68714e-35
mesenchyme	MPHOSPH8	12.7709	0.932419	1.75911e-36	1.34488e-35
mesenchyme	CAMLG	12.7461	0.967294	2.45419e-36	1.86811e-35
mesenchyme	HIC1	12.736	4.14686	7.21055e-36	5.43594e-35
mesenchyme	CAP1	12.7271	0.930228	3.12567e-36	2.37578e-35
mesenchyme	PDLIM4	12.6911	4.74831	1.33437e-35	1.00116e-34
mesenchyme	RBPMS	12.6875	0.932481	4.66154e-36	3.52952e-35
mesenchyme	CH25H	12.6779	6.4269	1.70533e-35	1.27705e-34
mesenchyme	HDAC5	12.6708	1.66281	9.04612e-36	6.80017e-35
mesenchyme	IKBIP	12.6666	2.43505	1.25399e-35	9.41749e-35
mesenchyme	STMN3	12.6579	3.4996	1.71075e-35	1.28049e-34
mesenchyme	RPS11	12.6574	0.403015	5.6843e-36	4.29356e-35
mesenchyme	ADAMTS2	12.6358	6.27823	2.68791e-35	2.00426e-34
mesenchyme	IRF1	12.5867	1.1007	1.80855e-35	1.35306e-34
mesenchyme	PSMB10	12.556	1.66672	3.51267e-35	2.61305e-34
mesenchyme	ATP6V1E1	12.544	1.06586	2.91531e-35	2.17279e-34
mesenchyme	KIAA0040	12.5401	1.83659	4.95972e-35	3.68078e-34
mesenchyme	KRTCAP2	12.5313	0.828096	3.12109e-35	2.32395e-34
mesenchyme	EIF4A1	12.5205	0.787176	3.11261e-35	2.31874e-34
mesenchyme	CCDC153	12.4921	4.62989	1.39384e-34	1.02282e-33
mesenchyme	GBP4	12.4865	2.27606	9.98137e-35	7.36923e-34
mesenchyme	PRR16	12.4734	8.17493	1.90412e-34	1.39272e-33
mesenchyme	PGAM1	12.4695	0.834274	7.24033e-35	5.36317e-34
mesenchyme	MICAL1	12.469	4.43397	1.7872e-34	1.30903e-33
mesenchyme	RPS2	12.4584	0.427107	5.66453e-35	4.20186e-34
mesenchyme	NT5C3B	12.4501	1.26046	1.09896e-34	8.1022e-34
mesenchyme	CSDC2	12.4413	7.68518	2.76962e-34	2.02013e-33
mesenchyme	CPNE2	12.4221	2.82787	2.45624e-34	1.79405e-33
mesenchyme	RPS13	12.4221	0.350841	7.98883e-35	5.91204e-34
mesenchyme	APOD	12.4133	6.80217	3.79808e-34	2.76002e-33
mesenchyme	RPL13	12.409	0.308303	1.03696e-34	7.64866e-34
mesenchyme	PABPC1	12.4077	0.667343	1.30336e-34	9.56876e-34
mesenchyme	LPP	12.403	0.921203	1.67933e-34	1.23117e-33
mesenchyme	TPM4	12.3913	0.821014	1.2341e-34	9.07295e-34
mesenchyme	SLC2A4	12.3885	5.39582	4.95657e-34	3.58695e-33
mesenchyme	PRRT2	12.3848	4.56181	4.67943e-34	3.39107e-33
mesenchyme	BCL6	12.3799	1.79919	3.41535e-34	2.48305e-33
mesenchyme	GUCY1A2	12.3681	10.3948	6.50931e-34	4.70197e-33
mesenchyme	MAP3K8	12.3612	2.08748	4.10353e-34	2.98061e-33
mesenchyme	FAP	12.351	8.31453	7.85974e-34	5.66962e-33
mesenchyme	AAMP	12.3409	1.05334	3.40173e-34	2.47428e-33
mesenchyme	IFI6	12.3329	1.35398	4.46808e-34	3.23941e-33
mesenchyme	RPS4X	12.3223	0.355325	2.45589e-34	1.79405e-33
mesenchyme	PDE1B	12.311	5.79475	1.19175e-33	8.55743e-33
mesenchyme	TBX3	12.309	2.43864	9.94917e-34	7.16368e-33
mesenchyme	JAK1	12.3067	0.962103	5.31127e-34	3.84187e-33
mesenchyme	SLC22A17	12.3016	4.07136	1.21292e-33	8.70545e-33
mesenchyme	INTS6	12.3008	1.01129	4.91736e-34	3.56186e-33
mesenchyme	TGFBI	12.2866	1.91499	1.06807e-33	7.68333e-33
mesenchyme	NUDT1	12.2701	2.18693	1.2376e-33	8.87849e-33
mesenchyme	NUPR1	12.2349	0.725321	9.4567e-34	6.81221e-33
mesenchyme	SORT1	12.2334	1.89526	1.80466e-33	1.28994e-32
mesenchyme	STAT3	12.222	0.889908	1.3913e-33	9.97661e-33
mesenchyme	CLTB	12.2182	0.903253	1.41322e-33	1.01199e-32
mesenchyme	TRIB2	12.2107	3.03584	3.07749e-33	2.19276e-32
mesenchyme	PTMS	12.1725	0.641563	1.78856e-33	1.27902e-32
mesenchyme	RPL30	12.1397	0.351768	3.04395e-33	2.16985e-32
mesenchyme	GAS1	12.1342	6.76093	9.3955e-33	6.62238e-32
mesenchyme	ARHGAP17	12.1335	2.36398	6.51711e-33	4.61633e-32
mesenchyme	TIMP4	12.1286	7.25907	9.91202e-33	6.9833e-32
mesenchyme	TCEAL1	12.1222	1.43611	5.45952e-33	3.87244e-32
mesenchyme	HAPLN3	12.1207	5.78239	1.05492e-32	7.42886e-32
mesenchyme	TCEAL8	12.0986	0.907889	5.12399e-33	3.63773e-32
mesenchyme	THRA	12.0901	1.64664	7.99233e-33	5.64602e-32
mesenchyme	ARHGEF6	12.0844	4.16519	1.4793e-32	1.03941e-31
mesenchyme	IDH3G	12.0834	1.13449	7.42618e-33	5.2508e-32
mesenchyme	DNM3OS	12.0798	5.36929	1.66165e-32	1.1639e-31
mesenchyme	PODN	12.0776	5.99686	1.75748e-32	1.23047e-31
mesenchyme	SIPA1L2	12.0635	2.41471	1.49772e-32	1.05189e-31
mesenchyme	DDX5	12.0583	0.632444	6.76947e-33	4.79293e-32
mesenchyme	HCLS1	12.0561	2.62142	1.56026e-32	1.09483e-31
mesenchyme	CYP7B1	12.0531	2.29122	1.64261e-32	1.15107e-31
mesenchyme	SERTAD1	12.0261	0.952302	1.15455e-32	8.12684e-32
mesenchyme	F2R	12.0006	3.20065	3.36312e-32	2.34107e-31
mesenchyme	ADAMTS9	11.9978	3.29162	3.69745e-32	2.57038e-31
mesenchyme	SYDE1	11.9968	2.29526	2.75213e-32	1.91916e-31
mesenchyme	OGN	11.9708	7.56475	5.99755e-32	4.14734e-31
mesenchyme	NFATC4	11.9511	4.44887	6.74382e-32	4.65519e-31
mesenchyme	RALY	11.9482	0.992763	3.20774e-32	2.2339e-31
mesenchyme	RASAL2	11.9267	1.66842	5.46761e-32	3.78421e-31
mesenchyme	LAMB2	11.925	1.33969	5.20113e-32	3.60295e-31
mesenchyme	FAM228B	11.9176	1.95904	6.62113e-32	4.57251e-31
mesenchyme	ARHGEF7	11.9166	1.77949	6.94375e-32	4.7911e-31
mesenchyme	NR4A3	11.9125	3.56348	9.74344e-32	6.69345e-31
mesenchyme	CBR3	11.9103	5.88691	1.14609e-31	7.85266e-31
mesenchyme	SCN3A	11.9022	7.05939	1.28277e-31	8.7777e-31
mesenchyme	KCNC4	11.8947	3.45379	1.15497e-31	7.91007e-31
mesenchyme	SNX21	11.8869	2.26315	1.0486e-31	7.191e-31
mesenchyme	GSTM5	11.8819	9.12075	1.63549e-31	1.11621e-30
mesenchyme	IQGAP1	11.8795	1.17271	7.46134e-32	5.14145e-31
mesenchyme	LZTS1	11.8579	6.84756	2.11438e-31	1.44055e-30
mesenchyme	JAM3	11.8569	5.50147	2.06041e-31	1.40438e-30
mesenchyme	BRK1	11.8425	0.623667	9.43121e-32	6.48179e-31
mesenchyme	LUC7L3	11.8328	0.806761	1.08031e-31	7.4052e-31
mesenchyme	ARHGAP29	11.8228	0.961371	1.43073e-31	9.76887e-31
mesenchyme	PTGIS	11.8067	4.64936	3.47593e-31	2.36204e-30
mesenchyme	APOLD1	11.7606	2.67566	4.80312e-31	3.25547e-30
mesenchyme	PEAR1	11.7566	5.74667	6.38597e-31	4.32271e-30
mesenchyme	UBN2	11.7477	1.78584	4.73353e-31	3.20969e-30
mesenchyme	ICAM2	11.7321	2.8392	6.49549e-31	4.39495e-30
mesenchyme	MEF2D	11.7061	2.04028	7.68853e-31	5.19546e-30
mesenchyme	MXRA5	11.7027	6.1462	1.15276e-30	7.75632e-30
mesenchyme	GRAMD1A	11.6961	2.97309	1.02295e-30	6.8888e-30
mesenchyme	ABR	11.6617	2.26385	1.29531e-30	8.70056e-30
mesenchyme	DUT	11.6579	0.777034	7.73196e-31	5.22032e-30
mesenchyme	PCNP	11.6572	0.846696	8.50909e-31	5.73761e-30
mesenchyme	ADGRF5	11.6519	4.08356	1.8557e-30	1.24116e-29
mesenchyme	SBSPON	11.6492	2.60388	1.49743e-30	1.00282e-29
mesenchyme	HIP1	11.642	1.58669	1.40141e-30	9.40924e-30
mesenchyme	ITGBL1	11.6415	7.18772	2.33733e-30	1.55601e-29
mesenchyme	PXDN	11.6318	2.22092	1.71771e-30	1.14985e-29
mesenchyme	RARRES1	11.6138	2.86539	2.68586e-30	1.78501e-29
mesenchyme	PRMT2	11.613	1.07415	1.46227e-30	9.80526e-30
mesenchyme	RAPGEF5	11.605	1.49237	1.96076e-30	1.30864e-29
mesenchyme	TERF1	11.5862	1.18159	2.17156e-30	1.44811e-29
mesenchyme	CALM1	11.5801	0.601008	1.95238e-30	1.30361e-29
mesenchyme	TPD52L2	11.5748	1.46749	2.60542e-30	1.73375e-29
mesenchyme	SPEG	11.5401	3.70704	6.13529e-30	4.05518e-29
mesenchyme	RBMS3	11.5382	1.39671	3.86198e-30	2.56015e-29
mesenchyme	HLA-DPB1	11.5335	1.20353	3.68686e-30	2.44509e-29
mesenchyme	CACNA2D1	11.526	7.73807	8.25322e-30	5.44817e-29
mesenchyme	GMFG	11.5143	1.68174	5.43189e-30	3.59177e-29
mesenchyme	PTPRG	11.4555	1.67018	1.12342e-29	7.39426e-29
mesenchyme	CD74	11.4497	0.938634	8.51265e-30	5.61471e-29
mesenchyme	HACD4	11.4473	3.92041	1.69201e-29	1.10902e-28
mesenchyme	TLCD2	11.4445	2.29755	1.39646e-29	9.16448e-29
mesenchyme	SNHG18	11.4393	1.42212	1.17456e-29	7.7276e-29
mesenchyme	GPR4	11.3798	5.73867	3.92774e-29	2.55734e-28
mesenchyme	TOMM7	11.3646	0.435128	2.00898e-29	1.31513e-28
mesenchyme	FGFR1	11.3623	1.47545	2.75157e-29	1.79601e-28
mesenchyme	LINC00702	11.3593	6.72738	4.96711e-29	3.22472e-28
mesenchyme	MEIS2	11.3574	1.1824	2.55821e-29	1.67049e-28
mesenchyme	CLDND1	11.3515	1.27561	3.06606e-29	1.99962e-28
mesenchyme	RPL29	11.3427	0.340801	2.39489e-29	1.5658e-28
mesenchyme	WDR1	11.3289	0.936681	3.54005e-29	2.30683e-28
mesenchyme	TRAF5	11.3277	3.75481	6.27126e-29	4.06804e-28
mesenchyme	SLC8B1	11.3103	2.53821	6.51279e-29	4.22122e-28
mesenchyme	GRIK1	11.2937	5.84671	9.80892e-29	6.31849e-28
mesenchyme	RPS10	11.2918	0.477018	4.35463e-29	2.83177e-28
mesenchyme	HSPA1A	11.2916	0.748009	4.84906e-29	3.15069e-28
mesenchyme	PLEKHG2	11.2841	2.50995	8.57337e-29	5.54077e-28
mesenchyme	LY96	11.2838	3.00534	9.13316e-29	5.8977e-28
mesenchyme	THBS1	11.2659	0.965085	7.19348e-29	4.65665e-28
mesenchyme	GSTM3	11.2602	1.09148	7.24279e-29	4.68663e-28
mesenchyme	CDC37	11.2579	0.857208	6.92775e-29	4.48648e-28
mesenchyme	GDI1	11.2416	1.34618	1.01005e-28	6.50363e-28
mesenchyme	NAALADL1	11.2292	5.00529	1.90997e-28	1.2238e-27
mesenchyme	EIF3H	11.1946	0.628999	1.28741e-28	8.27258e-28
mesenchyme	RASA4	11.1886	3.36814	2.70068e-28	1.72551e-27
mesenchyme	STON1	11.1859	4.23612	2.90523e-28	1.85394e-27
mesenchyme	CDS2	11.163	1.33508	2.47728e-28	1.58407e-27
mesenchyme	PTEN	11.157	1.08004	2.59492e-28	1.65862e-27
mesenchyme	HRH2	11.1563	8.0536	4.38559e-28	2.79068e-27
mesenchyme	COL16A1	11.1513	2.65049	3.63701e-28	2.3181e-27
mesenchyme	PLCB4	11.1258	5.53325	5.86334e-28	3.728e-27
mesenchyme	LTBP2	11.1085	10.0753	7.3007e-28	4.62692e-27
mesenchyme	PHF1	11.0835	1.46315	5.85606e-28	3.72488e-27
mesenchyme	SUMO2	11.0787	0.490856	4.20678e-28	2.67799e-27
mesenchyme	BCAR3	11.0619	2.0736	8.55869e-28	5.41109e-27
mesenchyme	NDUFA4	11.0558	0.435239	6.45385e-28	4.09848e-27
mesenchyme	TPT1-AS1	11.052	1.51448	8.31808e-28	5.26321e-27
mesenchyme	NDRG3	11.0163	2.08708	1.37567e-27	8.673e-27
mesenchyme	DES	11.0126	6.87282	1.98026e-27	1.24597e-26
mesenchyme	SRSF7	11.009	0.715004	9.82021e-28	6.20367e-27
mesenchyme	FOXC1	10.9997	5.30691	2.19924e-27	1.38209e-26
mesenchyme	FBXL13	10.9954	4.28594	2.19869e-27	1.38209e-26
mesenchyme	AFAP1L2	10.9908	6.17423	2.42609e-27	1.52222e-26
mesenchyme	UBE2N	10.9862	0.844947	1.34885e-27	8.50736e-27
mesenchyme	CDC42EP5	10.986	5.86689	2.56958e-27	1.6116e-26
mesenchyme	IGFBP3	10.9841	2.25285	2.24988e-27	1.41278e-26
mesenchyme	LAMA2	10.9776	26.3216	2.88224e-27	1.80338e-26
mesenchyme	NRP2	10.9738	3.56642	2.58768e-27	1.62231e-26
mesenchyme	FGF7	10.9636	2.15186	2.41809e-27	1.5178e-26
mesenchyme	PLXDC2	10.9621	3.2442	2.92977e-27	1.83239e-26
mesenchyme	CCR10	10.9618	4.60718	3.17452e-27	1.98388e-26
mesenchyme	PRKRA	10.9316	1.15194	2.70282e-27	1.69382e-26
mesenchyme	CCNH	10.9148	1.25578	3.45745e-27	2.15641e-26
mesenchyme	PCBP2	10.9125	0.595967	2.7063e-27	1.69532e-26
mesenchyme	AIP	10.9096	1.07072	3.25459e-27	2.03311e-26
mesenchyme	RRAGA	10.904	0.844137	3.25993e-27	2.03564e-26
mesenchyme	RBPJ	10.8942	0.976445	3.7113e-27	2.3129e-26
mesenchyme	SRSF3	10.8827	0.614241	3.60154e-27	2.24539e-26
mesenchyme	PDCL3	10.8804	1.33453	4.88058e-27	3.03919e-26
mesenchyme	UBE2E2	10.871	1.2422	5.40029e-27	3.35617e-26
mesenchyme	CDH6	10.8701	1.16616	5.12446e-27	3.18727e-26
mesenchyme	RPL39L	10.8555	1.51518	6.38801e-27	3.95905e-26
mesenchyme	PLEKHH3	10.8526	1.89988	7.51412e-27	4.6533e-26
mesenchyme	PARVA	10.8446	1.34324	7.22748e-27	4.47756e-26
mesenchyme	BAG3	10.8394	1.39606	7.63628e-27	4.72523e-26
mesenchyme	KAZN	10.8305	3.45807	1.1713e-26	7.22226e-26
mesenchyme	KCNAB1	10.8238	5.50631	1.36782e-26	8.41416e-26
mesenchyme	MEIS1	10.8143	3.1352	1.32224e-26	8.137e-26
mesenchyme	DBNL	10.807	1.20604	1.00258e-26	6.19162e-26
mesenchyme	PRRX1	10.8047	7.91723	1.71888e-26	1.0549e-25
mesenchyme	BEST1	10.7981	1.51287	1.16975e-26	7.21555e-26
mesenchyme	LMO4	10.7938	0.800416	1.01078e-26	6.2398e-26
mesenchyme	GOLIM4	10.7922	0.936949	1.19856e-26	7.38746e-26
mesenchyme	IER5L	10.7758	1.90602	1.70439e-26	1.04641e-25
mesenchyme	PLEKHA4	10.7737	1.34943	1.46e-26	8.97768e-26
mesenchyme	LGMN	10.7627	1.09838	1.56644e-26	9.62467e-26
mesenchyme	ATP10A	10.7621	6.47996	2.65392e-26	1.62367e-25
mesenchyme	HOXA3	10.7585	6.98612	2.75552e-26	1.68386e-25
mesenchyme	ASAP2	10.7496	2.84467	2.62392e-26	1.60593e-25
mesenchyme	OLFML2A	10.7492	5.25351	2.9156e-26	1.7803e-25
mesenchyme	SUSD5	10.747	7.45673	3.09033e-26	1.8826e-25
mesenchyme	TNXB	10.7384	4.35678	3.16529e-26	1.92752e-25
mesenchyme	RPL7A	10.7263	0.362442	1.75369e-26	1.07584e-25
mesenchyme	HVCN1	10.7258	4.36092	3.63457e-26	2.21071e-25
mesenchyme	EDIL3	10.7229	8.07502	3.98561e-26	2.41768e-25
mesenchyme	RGS7BP	10.7061	6.74082	4.6954e-26	2.84275e-25
mesenchyme	TSPAN3	10.7047	1.049	2.74817e-26	1.68002e-25
mesenchyme	ITPR1	10.6965	3.32524	4.62616e-26	2.80407e-25
mesenchyme	GFPT2	10.6964	5.91517	5.09677e-26	3.08456e-25
mesenchyme	TEAD2	10.6957	1.85507	3.65567e-26	2.22183e-25
mesenchyme	CHRD	10.6858	1.98918	4.6281e-26	2.80417e-25
mesenchyme	VDAC2	10.6838	0.64699	3.08005e-26	1.87706e-25
mesenchyme	BBX	10.6719	0.898923	3.67555e-26	2.23304e-25
mesenchyme	CALCRL	10.6671	4.04703	6.53027e-26	3.94453e-25
mesenchyme	SNTA1	10.6634	2.23187	5.91153e-26	3.57216e-25
mesenchyme	MIR503HG	10.6582	5.5578	7.50787e-26	4.53329e-25
mesenchyme	CSNK1E	10.6449	1.14937	5.44806e-26	3.2959e-25
mesenchyme	CKMT2	10.6305	2.69091	8.30937e-26	5.00762e-25
mesenchyme	MYOF	10.6242	2.30267	8.2312e-26	4.96241e-25
mesenchyme	CMTM3	10.6193	2.00315	8.14545e-26	4.9126e-25
mesenchyme	PDPN	10.6055	6.80155	1.30903e-25	7.8437e-25
mesenchyme	RGS6	10.6047	7.90259	1.33004e-25	7.96656e-25
mesenchyme	USP11	10.6038	1.32498	8.51702e-26	5.13078e-25
mesenchyme	ZNF580	10.594	1.0956	8.68037e-26	5.22719e-25
mesenchyme	TMC8	10.5868	3.66725	1.4059e-25	8.41451e-25
mesenchyme	RNF180	10.5804	1.86161	1.27233e-25	7.62671e-25
mesenchyme	AGAP2-AS1	10.5614	4.5999	1.92497e-25	1.14862e-24
mesenchyme	SRGN	10.5523	1.1423	1.27055e-25	7.61891e-25
mesenchyme	B3GALNT1	10.5399	2.86814	2.11478e-25	1.26092e-24
mesenchyme	CRIM1	10.5346	1.03317	1.6093e-25	9.62455e-25
mesenchyme	RPS28	10.5297	0.254615	1.40545e-25	8.41451e-25
mesenchyme	JAG1	10.5292	1.04413	1.62916e-25	9.73964e-25
mesenchyme	CSF1	10.5076	1.90304	2.63544e-25	1.56838e-24
mesenchyme	MT1A	10.4994	0.897633	2.43118e-25	1.44738e-24
mesenchyme	ZNF428	10.4939	0.798585	2.35251e-25	1.40107e-24
mesenchyme	DUSP26	10.4724	6.3945	4.98797e-25	2.94941e-24
mesenchyme	BASP1	10.4682	3.8533	4.79965e-25	2.83913e-24
mesenchyme	TSPAN2	10.4607	5.32977	5.48218e-25	3.23434e-24
mesenchyme	FMOD	10.4591	3.42244	5.13047e-25	3.03254e-24
mesenchyme	UNC5B	10.4432	5.79683	6.66131e-25	3.92263e-24
mesenchyme	SLC16A1-AS1	10.4244	2.4592	6.62538e-25	3.90294e-24
mesenchyme	NPY1R	10.4096	4.73919	9.11108e-25	5.35119e-24
mesenchyme	EEF1A1	10.3929	0.304919	5.1427e-25	3.03862e-24
mesenchyme	ZNF519	10.3811	2.47154	9.82404e-25	5.76561e-24
mesenchyme	ANK3	10.3745	1.51636	9.34727e-25	5.48785e-24
mesenchyme	HLA-DRB5	10.3744	2.26295	1.06149e-24	6.22513e-24
mesenchyme	PTPRS	10.3561	1.59596	1.1566e-24	6.77528e-24
mesenchyme	ZBTB38	10.3438	0.895615	1.08163e-24	6.3385e-24
mesenchyme	RPL27	10.3394	0.334721	1.01098e-24	5.93114e-24
mesenchyme	HAPLN2	10.3322	5.77683	1.98528e-24	1.15736e-23
mesenchyme	PPIA	10.3308	0.447756	1.06885e-24	6.26591e-24
mesenchyme	DYNC1I1	10.3117	7.20664	2.48476e-24	1.44639e-23
mesenchyme	CNN2	10.3101	1.08673	1.58594e-24	9.25581e-24
mesenchyme	PNISR	10.3046	0.631624	1.48298e-24	8.66461e-24
mesenchyme	RNF135	10.3033	2.82213	2.29879e-24	1.33913e-23
mesenchyme	ASB2	10.3019	5.57057	2.68269e-24	1.56045e-23
mesenchyme	TUSC3	10.2984	1.55986	1.89346e-24	1.10424e-23
mesenchyme	CRABP2	10.2853	5.34951	3.18118e-24	1.84631e-23
mesenchyme	ARMCX2	10.275	1.98989	2.67307e-24	1.55543e-23
mesenchyme	ACVRL1	10.2718	4.66795	3.54418e-24	2.05471e-23
mesenchyme	PYGM	10.2601	3.91022	3.7622e-24	2.17869e-23
mesenchyme	TMEM119	10.2467	9.21804	4.74847e-24	2.74075e-23
mesenchyme	DNAJB4	10.2444	1.00194	2.90163e-24	1.68593e-23
mesenchyme	PFKM	10.2263	1.78756	4.25864e-24	2.46255e-23
mesenchyme	GDF11	10.2249	2.28174	4.59788e-24	2.6548e-23
mesenchyme	RTN2	10.2152	2.44639	5.11742e-24	2.95154e-23
mesenchyme	EMD	10.2123	1.01695	4.33646e-24	2.5057e-23
mesenchyme	PDGFRL	10.1795	5.8847	9.04933e-24	5.18127e-23
mesenchyme	ADAMTS9-AS2	10.1692	2.27931	8.06108e-24	4.62555e-23
mesenchyme	SLC6A9	10.1677	4.43358	9.81361e-24	5.61477e-23
mesenchyme	IRF2BPL	10.1587	1.11954	7.66578e-24	4.40355e-23
mesenchyme	HTRA3	10.1581	26.3235	1.13121e-23	6.45799e-23
mesenchyme	SFRP2	10.1569	27.0764	1.1438e-23	6.52754e-23
mesenchyme	LDLRAD3	10.1373	5.28806	1.35454e-23	7.71056e-23
mesenchyme	GPC6	10.1318	1.52749	1.12408e-23	6.41964e-23
mesenchyme	GPC3	10.1192	5.71897	1.61772e-23	9.18874e-23
mesenchyme	SNHG15	10.1092	1.33614	1.27681e-23	7.27602e-23
mesenchyme	LXN	10.1048	1.88695	1.54572e-23	8.78609e-23
mesenchyme	RPS14	10.0882	0.227448	1.18847e-23	6.77998e-23
mesenchyme	HLA-DRA	10.0795	1.01992	1.56201e-23	8.8755e-23
mesenchyme	AKT3	10.0718	2.33722	2.15161e-23	1.21816e-22
mesenchyme	SNHG9	10.0697	0.994988	1.77007e-23	1.00432e-22
mesenchyme	ADD1	10.0665	1.00095	1.79587e-23	1.01859e-22
mesenchyme	RBM24	10.0637	4.85623	2.76989e-23	1.56314e-22
mesenchyme	NLRP1	10.0633	4.35589	2.63631e-23	1.48989e-22
mesenchyme	ST6GALNAC4	10.0611	2.62605	2.44236e-23	1.38227e-22
mesenchyme	MAMDC2	10.0574	8.09659	2.99631e-23	1.68788e-22
mesenchyme	LAMB1	10.0492	1.73901	2.44807e-23	1.38501e-22
mesenchyme	ADAMTS5	10.0409	6.28409	3.48666e-23	1.962e-22
mesenchyme	RHOQ	10.0334	1.63618	2.81052e-23	1.5855e-22
mesenchyme	SLFN11	10.009	4.43652	4.47969e-23	2.51179e-22
mesenchyme	ZNF385D	9.996	4.58814	5.18377e-23	2.90139e-22
mesenchyme	SH3BGRL3	9.99013	0.682697	3.44085e-23	1.9376e-22
mesenchyme	B3GNT2	9.98894	1.14002	3.93248e-23	2.20891e-22
mesenchyme	PHACTR2	9.97085	1.01549	4.4736e-23	2.50927e-22
mesenchyme	TPPP3	9.96489	0.802004	4.27819e-23	2.40224e-22

## Sheet: S7_GSEA Chol_Assembloids
Supplementary Dataset 3_S7: GSEA for Cholangiocyte cells in assembloids. KEGG and REACTOME pathways. Related to Fig. 4 and Extended Data Fig. 8. Filtered for Adjusted P-value < 0.05.
Gene_set	Term	Overlap	P-value	Adjusted P-value	Old P-value	Old Adjusted P-value	Odds Ratio	Combined Score	Genes	label
KEGG_2021_Human	Pathways in cancer	27/531	3.6476e-08	7.95176e-06	0	0	3.76688	64.5138	RALA;HSP90AB1;HDAC1;GSTP1;LAMA3;PDGFB;SLC2A1;LAMC2;HIF1A;MECOM;CCND1;CDH1;RAC2;NQO1;HSP90AA1;JUP;LAMB3;ITGA3;WNT7B;WNT7A;BMP4;CDK6;TRAF5;BAX;ITGA6;CALM1;CALM2	KEGG_2021_Human: Pathways in cancer
KEGG_2021_Human	Fluid shear stress and atherosclerosis	12/139	1.27287e-06	0.000138743	0	0	6.42159	87.1681	BMP4;NQO1;HSP90AA1;HSP90AB1;SUMO1;GSTP1;SUMO2;PDGFB;RAC2;CYBA;CALM1;CALM2	KEGG_2021_Human: Fluid shear stress and atherosclerosis
KEGG_2021_Human	ECM-receptor interaction	9/88	6.90435e-06	0.000501716	0	0	7.68146	91.2815	LAMB3;ITGB4;ITGA3;LAMA3;LAMC2;ITGA6;ITGB6;HSPG2;CD44	KEGG_2021_Human: ECM-receptor interaction
KEGG_2021_Human	Small cell lung cancer	9/92	9.96318e-06	0.000506062	0	0	7.30978	84.1839	CDK6;CCND1;LAMB3;ITGA3;TRAF5;LAMA3;BAX;LAMC2;ITGA6	KEGG_2021_Human: Small cell lung cancer
KEGG_2021_Human	Human papillomavirus infection	17/331	1.16069e-05	0.000506062	0	0	3.70869	42.1453	ATP6V1G1;LAMB3;ITGA3;HDAC1;ITGB4;WNT7B;LAMA3;WNT7A;LAMC2;CDK6;PKM;CCND1;BAX;ITGA6;ITGB6;LLGL2;ATP6V1F	KEGG_2021_Human: Human papillomavirus infection
KEGG_2021_Human	Arrhythmogenic right ventricular cardiomyopathy	8/77	2.00283e-05	0.000727696	0	0	7.79472	84.3261	DSP;JUP;ITGB4;ITGA3;DSG2;ITGA6;ITGB6;DSC2	KEGG_2021_Human: Arrhythmogenic right ventricular cardiomyopathy
KEGG_2021_Human	Endocytosis	14/252	2.93029e-05	0.000912575	0	0	4.00288	41.7814	HSPA8;CLTB;CLTA;ARPC5;RAB11A;RAB10;DAB2;RAB11FIP1;ARPC3;KIF5B;CHMP2A;CHMP3;FOLR1;CHMP5	KEGG_2021_Human: Endocytosis
KEGG_2021_Human	Focal adhesion	12/201	5.44362e-05	0.00148339	0	0	4.30137	42.2329	CCND1;LAMB3;ITGB4;ITGA3;LAMA3;PDGFB;RAC2;CAPN2;LAMC2;ITGA6;ITGB6;MYL12B	KEGG_2021_Human: Focal adhesion
KEGG_2021_Human	Regulation of actin cytoskeleton	12/218	0.000118224	0.00286364	0	0	3.94296	35.6559	GSN;ARPC3;ITGB4;ITGA3;PDGFB;RAC2;ITGA6;IQGAP1;ARPC5;ITGB6;EZR;MYL12B	KEGG_2021_Human: Regulation of actin cytoskeleton
KEGG_2021_Human	Hippo signaling pathway	10/163	0.000181538	0.00374768	0	0	4.40545	37.9488	BMP4;YWHAE;CCND1;CDH1;YWHAB;WNT7B;RASSF6;WNT7A;YWHAZ;LLGL2	KEGG_2021_Human: Hippo signaling pathway
KEGG_2021_Human	Mucin type O-glycan biosynthesis	5/36	0.000189103	0.00374768	0	0	10.754	92.1961	GALNT7;ST6GALNAC1;GALNT5;GALNT3;GALNT1	KEGG_2021_Human: Mucin type O-glycan biosynthesis
KEGG_2021_Human	Estrogen signaling pathway	9/137	0.00022847	0.00415053	0	0	4.72906	39.6489	HSPA8;HSP90AA1;KRT19;HSP90AB1;KRT17;ITPR3;CALM1;CALM2;CTSD	KEGG_2021_Human: Estrogen signaling pathway
KEGG_2021_Human	PI3K-Akt signaling pathway	15/354	0.00031723	0.0053197	0	0	3.0059	24.2152	YWHAE;HSP90AA1;HSP90AB1;LAMB3;ITGA3;YWHAB;ITGB4;LAMA3;PDGFB;LAMC2;YWHAZ;CDK6;CCND1;ITGA6;ITGB6	KEGG_2021_Human: PI3K-Akt signaling pathway
KEGG_2021_Human	Cell cycle	8/124	0.000571477	0.00889871	0	0	4.62541	34.5393	CDKN1C;YWHAE;CDK6;CCND1;YWHAB;HDAC1;SFN;YWHAZ	KEGG_2021_Human: Cell cycle
KEGG_2021_Human	Fc gamma R-mediated phagocytosis	7/97	0.000646826	0.00940053	0	0	5.20554	38.2265	MARCKSL1;GSN;MYO10;ARPC3;RAC2;ARPC5;PLPP2	KEGG_2021_Human: Fc gamma R-mediated phagocytosis
KEGG_2021_Human	p53 signaling pathway	6/73	0.000794129	0.01082	0	0	5.9802	42.6883	CDK6;CCND1;PERP;BAX;SFN;SERPINB5	KEGG_2021_Human: p53 signaling pathway
KEGG_2021_Human	Glioma	6/75	0.000916207	0.011749	0	0	5.80627	40.6164	CDK6;CCND1;PDGFB;BAX;CALM1;CALM2	KEGG_2021_Human: Glioma
KEGG_2021_Human	Viral carcinogenesis	10/203	0.00102201	0.0123777	0	0	3.48526	23.9994	YWHAE;GSN;CDK6;PKM;CCND1;YWHAB;HDAC1;TRAF5;BAX;YWHAZ	KEGG_2021_Human: Viral carcinogenesis
KEGG_2021_Human	Salmonella infection	11/249	0.00140907	0.0161672	0	0	3.11247	20.4328	HSP90AA1;RALA;HSP90AB1;DYNLT1;ARPC3;KIF5B;AHNAK2;BAX;ARPC5;MYL12B;S100A10	KEGG_2021_Human: Salmonella infection
KEGG_2021_Human	Necroptosis	8/159	0.00280861	0.0306138	0	0	3.54695	20.8385	HSP90AA1;HSP90AB1;TRAF5;CAPN2;CHMP2A;CHMP3;BAX;CHMP5	KEGG_2021_Human: Necroptosis
KEGG_2021_Human	Prostate cancer	6/97	0.00342062	0.0355093	0	0	4.39762	24.9694	HSP90AA1;HSP90AB1;CCND1;SPINT1;GSTP1;PDGFB	KEGG_2021_Human: Prostate cancer
KEGG_2021_Human	Proteoglycans in cancer	9/205	0.00390165	0.0385843	0	0	3.07764	17.0697	CCND1;WNT7B;WNT7A;ITPR3;IQGAP1;EZR;HSPG2;HIF1A;CD44	KEGG_2021_Human: Proteoglycans in cancer
KEGG_2021_Human	Tight junction	8/169	0.00407082	0.0385843	0	0	3.32494	18.3002	CLDN4;CCND1;ARPC3;RAB13;ARPC5;EZR;LLGL2;MYL12B	KEGG_2021_Human: Tight junction
KEGG_2021_Human	Melanoma	5/72	0.00452911	0.0411394	0	0	4.96661	26.8059	CDK6;CCND1;CDH1;PDGFB;BAX	KEGG_2021_Human: Melanoma
KEGG_2021_Human	Other types of O-glycan biosynthesis	4/47	0.00533148	0.044366	0	0	6.17756	32.3341	GALNT7;GALNT5;GALNT3;GALNT1	KEGG_2021_Human: Other types of O-glycan biosynthesis
KEGG_2021_Human	Glucagon signaling pathway	6/107	0.00552798	0.044366	0	0	3.96019	20.5848	LDHB;PKM;SLC2A1;ITPR3;CALM1;CALM2	KEGG_2021_Human: Glucagon signaling pathway
KEGG_2021_Human	Chronic myeloid leukemia	5/76	0.00569838	0.044366	0	0	4.68584	24.2144	CDK6;CCND1;MECOM;HDAC1;BAX	KEGG_2021_Human: Chronic myeloid leukemia
KEGG_2021_Human	Pancreatic cancer	5/76	0.00569838	0.044366	0	0	4.68584	24.2144	RALA;CDK6;CCND1;RAC2;BAX	KEGG_2021_Human: Pancreatic cancer
KEGG_2021_Human	Bacterial invasion of epithelial cells	5/77	0.00602103	0.0444323	0	0	4.62053	23.6224	CDH1;ARPC3;CLTB;CLTA;ARPC5	KEGG_2021_Human: Bacterial invasion of epithelial cells
KEGG_2021_Human	Ether lipid metabolism	4/49	0.00618719	0.0444323	0	0	5.9024	30.0153	UGT8;LPCAT2;PAFAH1B3;PLPP2	KEGG_2021_Human: Ether lipid metabolism
KEGG_2021_Human	Axon guidance	8/182	0.00631836	0.0444323	0	0	3.07448	15.5701	EFNB2;ROBO2;EPHA4;ABLIM1;SEMA3C;RAC2;NTN4;MYL12B	KEGG_2021_Human: Axon guidance
Reactome_2022	Neutrophil Degranulation R-HSA-6798695	31/468	4.80108e-12	3.81206e-09	0	0	5.07986	132.392	CSTB;TINAGL1;HSP90AB1;GSTP1;IQGAP1;SRP14;LGALS3;SDCBP;LAMP1;TIMP2;QSOX1;CTSD;S100A11;HSPA8;SERPINB1;HSP90AA1;GSN;JUP;DYNLT1;XRCC5;RNASET2;NBEAL2;CYBA;TMC6;ARPC5;SERPINB6;VAMP8;RAB10;PKM;CEACAM6;CD44	Reactome_2022: Neutrophil Degranulation R-HSA-6798695
Reactome_2022	Extracellular Matrix Organization R-HSA-1474244	22/291	5.86152e-10	2.32702e-07	0	0	5.71638	121.516	DDR1;COL17A1;MMP7;LAMB3;ITGB4;ITGA3;PDGFB;NTN4;CASK;LAMC2;HSPG2;KLK7;BMP4;CAPN8;CEACAM6;TIMP2;CAPN2;ADAM9;ITGA6;ITGB6;CTSD;CD44	Reactome_2022: Extracellular Matrix Organization R-HSA-1474244
Reactome_2022	Immune System R-HSA-168256	62/1943	7.6319e-09	1.55654e-06	0	0	2.4678	46.1254	APP;TINAGL1;HSP90AB1;YWHAB;CLSTN1;CLTA;SRP14;LGALS3;CCND1;LAMP1;SUMO1;TRIM29;KIF5B;TIMP2;RAC2;QSOX1;CTSE;CTSD;DUSP4;ATP6V1G1;SERPINB1;HSP90AA1;ANXA1;CXADR;DYNLT1;UBE2E3;RNASET2;CYBA;TMC6;YWHAZ;SERPINB6;VAMP8;PKM;IFI27;CEACAM6;CD44;CSTB;RALA;GSTP1;IL20RA;IFI6;ITPR3;IQGAP1;HIF1A;SDCBP;MUC1;S100A11;AP1M2;ATP6V1F;NPDC1;CD74;HSPA8;GSN;JUP;MYO10;XRCC5;NBEAL2;ARPC5;FKBP1A;RAB10;ARPC3;CALM1	Reactome_2022: Immune System R-HSA-168256
Reactome_2022	Non-integrin membrane-ECM Interactions R-HSA-3000171	9/41	7.8415e-09	1.55654e-06	0	0	19.009	354.781	DDR1;LAMB3;ITGB4;NTN4;PDGFB;CASK;LAMC2;ITGA6;HSPG2	Reactome_2022: Non-integrin membrane-ECM Interactions R-HSA-3000171
Reactome_2022	Innate Immune System R-HSA-168249	41/1035	1.31108e-08	2.08199e-06	0	0	2.97906	54.0694	APP;CSTB;TINAGL1;HSP90AB1;GSTP1;ITPR3;IQGAP1;SRP14;LGALS3;SDCBP;MUC1;LAMP1;TIMP2;RAC2;QSOX1;CTSD;S100A11;ATP6V1F;DUSP4;HSPA8;ATP6V1G1;SERPINB1;HSP90AA1;GSN;JUP;MYO10;DYNLT1;XRCC5;RNASET2;NBEAL2;CYBA;TMC6;ARPC5;SERPINB6;VAMP8;RAB10;PKM;CEACAM6;ARPC3;CALM1;CD44	Reactome_2022: Innate Immune System R-HSA-168249
Reactome_2022	Type I Hemidesmosome Assembly R-HSA-446107	5/9	8.80966e-08	1.01263e-05	0	0	83.4576	1355.76	COL17A1;LAMB3;ITGB4;ITGA6;LAMC2	Reactome_2022: Type I Hemidesmosome Assembly R-HSA-446107
Reactome_2022	Degradation Of Extracellular Matrix R-HSA-1474228	12/109	8.92751e-08	1.01263e-05	0	0	8.42053	136.678	COL17A1;CAPN8;MMP7;LAMB3;CAPN2;TIMP2;ADAM9;LAMC2;HSPG2;CTSD;KLK7;CD44	Reactome_2022: Degradation Of Extracellular Matrix R-HSA-1474228
Reactome_2022	Lysosome Vesicle Biogenesis R-HSA-432720	7/34	6.0558e-07	5.82623e-05	0	0	17.4075	249.225	VAMP8;APP;HSPA8;CLTB;CHMP2A;CLTA;AP1M2	Reactome_2022: Lysosome Vesicle Biogenesis R-HSA-432720
Reactome_2022	Laminin Interactions R-HSA-3000157	6/22	6.60404e-07	5.82623e-05	0	0	25.1071	357.285	LAMB3;ITGA3;ITGB4;LAMC2;ITGA6;HSPG2	Reactome_2022: Laminin Interactions R-HSA-3000157
Reactome_2022	Translocation Of SLC2A4 (GLUT4) To Plasma Membrane R-HSA-1445148	8/51	8.49183e-07	6.74251e-05	0	0	12.5244	175.078	YWHAE;RAB10;RALA;YWHAB;RAB13;CALM1;YWHAZ;RAB11A	Reactome_2022: Translocation Of SLC2A4 (GLUT4) To Plasma Membrane R-HSA-1445148
Reactome_2022	Hemostasis R-HSA-109582	25/576	2.20159e-06	0.000158915	0	0	3.15938	41.1551	LGALS3BP;APP;HDAC1;PDGFB;ITPR3;SRI;EPCAM;KIF5B;RAC2;KCNMB4;QSOX1;S100A10;CD74;CXADR;ITGA3;PCDH7;YWHAZ;SGPP2;SERPINB6;SLC7A7;CEACAM6;ITGA6;CALM1;GAS6;CD44	Reactome_2022: Hemostasis R-HSA-109582
Reactome_2022	Vesicle-mediated Transport R-HSA-5653656	26/637	4.19154e-06	0.000267917	0	0	2.96459	36.7089	YWHAE;APP;RALA;KDELR1;YWHAB;CLTB;CLTA;KIF5B;AP1M2;HSPA8;HSP90AA1;GALNT1;SYTL1;ARPC5;SYT8;YWHAZ;RAB11A;VAMP8;RAB10;DAB2;ARPC3;RAB13;CHMP2A;CALM1;PAFAH1B3;CHMP5	Reactome_2022: Vesicle-mediated Transport R-HSA-5653656
Reactome_2022	Membrane Trafficking R-HSA-199991	25/599	4.38654e-06	0.000267917	0	0	3.02914	37.3704	YWHAE;APP;RALA;KDELR1;YWHAB;CLTB;CLTA;KIF5B;AP1M2;HSPA8;GALNT1;SYTL1;ARPC5;SYT8;YWHAZ;RAB11A;VAMP8;RAB10;DAB2;ARPC3;RAB13;CHMP2A;CALM1;PAFAH1B3;CHMP5	Reactome_2022: Membrane Trafficking R-HSA-199991
Reactome_2022	Signaling By Receptor Tyrosine Kinases R-HSA-9006934	22/496	6.47928e-06	0.000367468	0	0	3.20988	38.3481	DUSP4;RALA;ATP6V1G1;HSP90AA1;JUP;LAMB3;GALNT3;ITGA3;YWHAB;HDAC1;PDGFB;CLTA;CYBA;ITPR3;LAMC2;SPINT2;HIF1A;SPINT1;STMN1;BAX;CALM1;ATP6V1F	Reactome_2022: Signaling By Receptor Tyrosine Kinases R-HSA-9006934
Reactome_2022	Cell-Cell Communication R-HSA-1500931	10/120	1.34613e-05	0.000712553	0	0	6.14107	68.8763	COL17A1;CLDN4;JUP;LAMB3;FBLIM1;ITGB4;CASK;LAMC2;ITGA6;IQGAP1	Reactome_2022: Cell-Cell Communication R-HSA-1500931
Reactome_2022	Cell Junction Organization R-HSA-446728	8/86	4.49526e-05	0.00223077	0	0	6.89217	68.9899	COL17A1;CLDN4;JUP;LAMB3;ITGB4;FBLIM1;LAMC2;ITGA6	Reactome_2022: Cell Junction Organization R-HSA-446728
Reactome_2022	Disease R-HSA-1643685	47/1736	5.29982e-05	0.00247533	0	0	1.981	19.5035	CDKN1C;YWHAE;APP;HSP90AB1;TUSC3;YWHAB;HDAC1;CLSTN1;PDGFB;SLC2A1;CLTA;ITPR3;IQGAP1;CHD3;TRAK1;ZDHHC3;PAPSS1;MUC1;FUT8;CCND1;SUMO1;KIF5B;SLCO1B3;RAC2;CAPN2;AP1M2;HSP90AA1;GALNT3;MYO10;XRCC5;PLK2;GALNT1;HMGA1;CYBA;ARPC5;HSPG2;YWHAZ;FKBP1A;SLC7A7;CDK6;TCN2;ARPC3;RBP1;SLCO2A1;CHMP2A;CALM1;CHMP5	Reactome_2022: Disease R-HSA-1643685
Reactome_2022	EPH-Ephrin Signaling R-HSA-2682334	8/91	6.74949e-05	0.00297727	0	0	6.47533	62.1855	EFNB2;EPHA4;SDCBP;ARPC3;CLTB;CLTA;ARPC5;MYL12B	Reactome_2022: EPH-Ephrin Signaling R-HSA-2682334
Reactome_2022	trans-Golgi Network Vesicle Budding R-HSA-199992	7/71	9.32196e-05	0.0038956	0	0	7.32999	68.0264	VAMP8;APP;HSPA8;CLTB;CHMP2A;CLTA;AP1M2	Reactome_2022: trans-Golgi Network Vesicle Budding R-HSA-199992
Reactome_2022	Cell Surface Interactions At Vascular Wall R-HSA-202733	9/134	0.000193448	0.00767987	0	0	4.8433	41.4126	CD74;CXADR;SLC7A7;ITGA3;CEACAM6;EPCAM;ITGA6;GAS6;CD44	Reactome_2022: Cell Surface Interactions At Vascular Wall R-HSA-202733
Reactome_2022	Formation Of Annular Gap Junctions R-HSA-196025	3/9	0.00026249	0.00992461	0	0	33.1549	273.372	DAB2;CLTB;CLTA	Reactome_2022: Formation Of Annular Gap Junctions R-HSA-196025
Reactome_2022	Gap Junction Degradation R-HSA-190873	3/10	0.000370827	0.0133835	0	0	28.417	224.488	DAB2;CLTB;CLTA	Reactome_2022: Gap Junction Degradation R-HSA-190873
Reactome_2022	Signaling By Rho GTPases, Miro GTPases And RHOBTB3 R-HSA-9716542	22/660	0.000428964	0.0148086	0	0	2.36443	18.3341	YWHAE;HSP90AA1;HSP90AB1;JUP;YWHAB;PCDH7;AMIGO2;CYBA;IQGAP1;ARPC5;TRAK1;ADD3;YWHAZ;MYL12B;ARPC3;KIF5B;RAC2;EFHD2;DSG2;CKB;CALM1;DBN1	Reactome_2022: Signaling By Rho GTPases, Miro GTPases And RHOBTB3 R-HSA-9716542
Reactome_2022	SARS-CoV Infections R-HSA-9679506	15/369	0.000489986	0.0162104	0	0	2.8763	21.9207	YWHAE;HSP90AA1;HSP90AB1;TUSC3;YWHAB;HDAC1;GALNT1;CHD3;HSPG2;YWHAZ;ZDHHC3;FKBP1A;FUT8;SUMO1;CHMP2A	Reactome_2022: SARS-CoV Infections R-HSA-9679506
Reactome_2022	Platelet Degranulation R-HSA-114608	8/125	0.000602757	0.0191436	0	0	4.58565	33.998	LGALS3BP;APP;PCDH7;PDGFB;QSOX1;CALM1;GAS6;SGPP2	Reactome_2022: Platelet Degranulation R-HSA-114608
Reactome_2022	Signaling By Rho GTPases R-HSA-194315	21/644	0.000764998	0.0218931	0	0	2.30482	16.5386	YWHAE;HSP90AA1;HSP90AB1;JUP;YWHAB;PCDH7;AMIGO2;CYBA;IQGAP1;ARPC5;ADD3;YWHAZ;MYL12B;ARPC3;KIF5B;RAC2;EFHD2;DSG2;CKB;CALM1;DBN1	Reactome_2022: Signaling By Rho GTPases R-HSA-194315
Reactome_2022	Response To Elevated Platelet Cytosolic Ca2+ R-HSA-76005	8/130	0.000780582	0.0218931	0	0	4.39659	31.4596	LGALS3BP;APP;PCDH7;PDGFB;QSOX1;CALM1;GAS6;SGPP2	Reactome_2022: Response To Elevated Platelet Cytosolic Ca2+ R-HSA-76005
Reactome_2022	Developmental Biology R-HSA-1266738	30/1073	0.000796801	0.0218931	0	0	1.98754	14.1809	ROBO2;HSP90AB1;ONECUT3;CLSTN1;NTN4;CLTB;CLTA;MYL12B;EFNB2;SDCBP;ABLIM1;PERP;PRSS8;EPHA4;HSPA8;ST14;HSP90AA1;JUP;MYO10;KRT8;KRT7;ARPC5;BMP4;KRT19;KLF5;KRT17;ARPC3;DSG2;PKP3;EZR	Reactome_2022: Developmental Biology R-HSA-1266738
Reactome_2022	Formation Of Cornified Envelope R-HSA-6809371	6/74	0.000853487	0.0218931	0	0	5.89196	41.6336	ST14;JUP;PERP;DSG2;PRSS8;PKP3	Reactome_2022: Formation Of Cornified Envelope R-HSA-6809371
Reactome_2022	Chk1/Chk2(Cds1) Mediated Inactivation Of Cyclin B:Cdk1 Complex R-HSA-75035	3/13	0.000854768	0.0218931	0	0	19.8889	140.509	YWHAE;YWHAB;YWHAZ	Reactome_2022: Chk1/Chk2(Cds1) Mediated Inactivation Of Cyclin B:Cdk1 Complex R-HSA-75035
Reactome_2022	SARS-CoV-2 Targets Host Intracellular Signaling And Regulatory Pathways R-HSA-9755779	3/13	0.000854768	0.0218931	0	0	19.8889	140.509	YWHAE;YWHAB;YWHAZ	Reactome_2022: SARS-CoV-2 Targets Host Intracellular Signaling And Regulatory Pathways R-HSA-9755779
Reactome_2022	Signal Transduction R-HSA-162582	56/2465	0.000946426	0.0234832	0	0	1.64733	11.4701	YWHAE;APP;HSP90AB1;YWHAB;CLSTN1;CLTB;CLTA;LAMC2;SPINT2;CHD3;CXCL16;MECOM;CCND1;KIF5B;STMN1;RAC2;EFHD2;PMEPA1;ITGB6;CTSD;DUSP4;ATP6V1G1;HSP90AA1;ANXA1;MMP7;ITGA3;CTNNBIP1;CYBA;YWHAZ;SPINT1;DSG2;DBN1;RALA;HDAC1;AMIGO2;PDGFB;ITPR3;IQGAP1;TRAK1;ADD3;HIF1A;MYL12B;CKB;ATP6V1F;JUP;LAMB3;GALNT3;WNT7B;PCDH7;WNT7A;ARPC5;FKBP1A;DHRS9;ARPC3;BAX;CALM1	Reactome_2022: Signal Transduction R-HSA-162582
Reactome_2022	Sensory Processing Of Sound By Outer Hair Cells Of Cochlea R-HSA-9662361	5/53	0.00116966	0.0279661	0	0	6.93927	46.8473	GSN;EPB41L3;USH1C;CASK;EZR	Reactome_2022: Sensory Processing Of Sound By Outer Hair Cells Of Cochlea R-HSA-9662361
Reactome_2022	Keratinization R-HSA-6805567	10/208	0.00122803	0.0279661	0	0	3.39638	22.7637	ST14;KRT19;JUP;KRT17;PERP;KRT8;KRT7;DSG2;PRSS8;PKP3	Reactome_2022: Keratinization R-HSA-6805567
Reactome_2022	SARS-CoV-2 Infection R-HSA-9694516	12/283	0.00123276	0.0279661	0	0	2.98724	20.01	YWHAE;FUT8;HSP90AA1;HSP90AB1;SUMO1;TUSC3;YWHAB;GALNT1;CHMP2A;HSPG2;YWHAZ;ZDHHC3	Reactome_2022: SARS-CoV-2 Infection R-HSA-9694516
Reactome_2022	Activation Of BAD And Translocation To Mitochondria R-HSA-111447	3/15	0.00132996	0.0288802	0	0	16.5724	109.752	YWHAE;YWHAB;YWHAZ	Reactome_2022: Activation Of BAD And Translocation To Mitochondria R-HSA-111447
Reactome_2022	Infectious Disease R-HSA-5663205	27/961	0.00135627	0.0288802	0	0	1.98713	13.121	YWHAE;HSP90AB1;TUSC3;YWHAB;HDAC1;CLTA;ITPR3;CHD3;ZDHHC3;FUT8;SUMO1;AP1M2;HSP90AA1;MYO10;XRCC5;PLK2;GALNT1;HMGA1;CYBA;ARPC5;HSPG2;YWHAZ;FKBP1A;ARPC3;CHMP2A;CALM1;CHMP5	Reactome_2022: Infectious Disease R-HSA-5663205
Reactome_2022	Clathrin-mediated Endocytosis R-HSA-8856828	8/142	0.00138217	0.0288802	0	0	4.00041	26.3391	VAMP8;HSPA8;DAB2;ARPC3;CLTB;CLTA;ARPC5;SYT8	Reactome_2022: Clathrin-mediated Endocytosis R-HSA-8856828
Reactome_2022	Assembly Of Collagen Fibrils And Other Multimeric Structures R-HSA-2022090	5/57	0.00162559	0.0327465	0	0	6.40417	41.1268	MMP7;LAMB3;ITGB4;LAMC2;ITGA6	Reactome_2022: Assembly Of Collagen Fibrils And Other Multimeric Structures R-HSA-2022090
Reactome_2022	Platelet Activation, Signaling And Aggregation R-HSA-76002	11/254	0.0016497	0.0327465	0	0	3.04765	19.5268	LGALS3BP;APP;PCDH7;PDGFB;RAC2;QSOX1;ITPR3;CALM1;GAS6;YWHAZ;SGPP2	Reactome_2022: Platelet Activation, Signaling And Aggregation R-HSA-76002
Reactome_2022	Late SARS-CoV-2 Infection Events R-HSA-9772573	5/58	0.00175746	0.0340348	0	0	6.28302	39.8587	FUT8;SUMO1;TUSC3;GALNT1;ZDHHC3	Reactome_2022: Late SARS-CoV-2 Infection Events R-HSA-9772573
Reactome_2022	Aberrant Regulation Of Mitotic G1/S Transition In Cancer Due To RB1 Defects R-HSA-9659787	3/17	0.001944	0.0353333	0	0	14.2035	88.6723	CDKN1C;CDK6;CCND1	Reactome_2022: Aberrant Regulation Of Mitotic G1/S Transition In Cancer Due To RB1 Defects R-HSA-9659787
Reactome_2022	MET Activates PTK2 Signaling R-HSA-8874081	3/17	0.001944	0.0353333	0	0	14.2035	88.6723	LAMB3;ITGA3;LAMC2	Reactome_2022: MET Activates PTK2 Signaling R-HSA-8874081
Reactome_2022	Fcgamma Receptor (FCGR) Dependent Phagocytosis R-HSA-2029480	6/87	0.00197893	0.0353333	0	0	4.94306	30.7715	HSP90AA1;HSP90AB1;MYO10;ARPC3;ITPR3;ARPC5	Reactome_2022: Fcgamma Receptor (FCGR) Dependent Phagocytosis R-HSA-2029480
Reactome_2022	ROS And RNS Production In Phagocytes R-HSA-1222556	4/36	0.00200251	0.0353333	0	0	8.30574	51.6065	ATP6V1G1;RAC2;CYBA;ATP6V1F	Reactome_2022: ROS And RNS Production In Phagocytes R-HSA-1222556
Reactome_2022	Drug-mediated Inhibition Of CDK4/CDK6 Activity R-HSA-9754119	2/5	0.00217648	0.0360026	0	0	44.0649	270.12	CDK6;CCND1	Reactome_2022: Drug-mediated Inhibition Of CDK4/CDK6 Activity R-HSA-9754119
Reactome_2022	SUMO Is Proteolytically Processed R-HSA-3065679	2/5	0.00217648	0.0360026	0	0	44.0649	270.12	SUMO1;SUMO2	Reactome_2022: SUMO Is Proteolytically Processed R-HSA-3065679
Reactome_2022	Signaling By MST1 R-HSA-8852405	2/5	0.00217648	0.0360026	0	0	44.0649	270.12	SPINT1;SPINT2	Reactome_2022: Signaling By MST1 R-HSA-8852405
Reactome_2022	Axon Guidance R-HSA-422475	17/519	0.00227908	0.036101	0	0	2.29728	13.9766	ROBO2;EPHA4;HSPA8;HSP90AA1;HSP90AB1;MYO10;CLSTN1;NTN4;CLTB;CLTA;ARPC5;MYL12B;EFNB2;SDCBP;ABLIM1;ARPC3;EZR	Reactome_2022: Axon Guidance R-HSA-422475
Reactome_2022	Collagen Formation R-HSA-1474290	6/90	0.00235068	0.036101	0	0	4.76579	28.8476	COL17A1;MMP7;LAMB3;ITGB4;LAMC2;ITGA6	Reactome_2022: Collagen Formation R-HSA-1474290
Reactome_2022	Regulation Of Actin Dynamics For Phagocytic Cup Formation R-HSA-2029482	5/62	0.0023643	0.036101	0	0	5.84092	35.3216	HSP90AA1;HSP90AB1;MYO10;ARPC3;ARPC5	Reactome_2022: Regulation Of Actin Dynamics For Phagocytic Cup Formation R-HSA-2029482
Reactome_2022	Signaling By BRAF And RAF1 Fusions R-HSA-6802952	5/62	0.0023643	0.036101	0	0	5.84092	35.3216	YWHAB;IQGAP1;TRAK1;CALM1;PAPSS1	Reactome_2022: Signaling By BRAF And RAF1 Fusions R-HSA-6802952
Reactome_2022	Signaling By MET R-HSA-6806834	5/63	0.00253716	0.0379377	0	0	5.73992	34.3058	SPINT1;LAMB3;ITGA3;LAMC2;SPINT2	Reactome_2022: Signaling By MET R-HSA-6806834
Reactome_2022	RHO GTPase Effectors R-HSA-195258	11/269	0.00258015	0.0379377	0	0	2.86824	17.0945	YWHAE;ARPC3;YWHAB;KIF5B;RAC2;CYBA;IQGAP1;ARPC5;CALM1;YWHAZ;MYL12B	Reactome_2022: RHO GTPase Effectors R-HSA-195258
Reactome_2022	Collagen Degradation R-HSA-1442490	4/40	0.00296458	0.0420743	0	0	7.38138	42.9672	COL17A1;MMP7;ADAM9;CTSD	Reactome_2022: Collagen Degradation R-HSA-1442490
Reactome_2022	Integrin Cell Surface Interactions R-HSA-216083	5/66	0.00311072	0.0420743	0	0	5.45679	31.5015	ITGA3;ITGA6;ITGB6;HSPG2;CD44	Reactome_2022: Integrin Cell Surface Interactions R-HSA-216083
Reactome_2022	Chaperone Mediated Autophagy R-HSA-9613829	3/20	0.00315253	0.0420743	0	0	11.6952	67.359	HSPA8;HSP90AA1;HSP90AB1	Reactome_2022: Chaperone Mediated Autophagy R-HSA-9613829
Reactome_2022	Syndecan Interactions R-HSA-3000170	3/20	0.00315253	0.0420743	0	0	11.6952	67.359	ITGB4;CASK;ITGA6	Reactome_2022: Syndecan Interactions R-HSA-3000170
Reactome_2022	MET Receptor Activation R-HSA-6806942	2/6	0.00323241	0.0420743	0	0	33.047	189.509	SPINT1;SPINT2	Reactome_2022: MET Receptor Activation R-HSA-6806942
Reactome_2022	SUMO Is Transferred From E1 To E2 (UBE2I, UBC9) R-HSA-3065678	2/6	0.00323241	0.0420743	0	0	33.047	189.509	SUMO1;SUMO2	Reactome_2022: SUMO Is Transferred From E1 To E2 (UBE2I, UBC9) R-HSA-3065678
Reactome_2022	Uptake And Function Of Diphtheria Toxin R-HSA-5336415	2/6	0.00323241	0.0420743	0	0	33.047	189.509	HSP90AA1;HSP90AB1	Reactome_2022: Uptake And Function Of Diphtheria Toxin R-HSA-5336415
Reactome_2022	Deregulated CDK5 Triggers Neurodegenerative Pathways In Alzheimers Disease Models R-HSA-8862803	3/21	0.00363749	0.0465833	0	0	11.0449	62.0332	YWHAE;APP;CAPN2	Reactome_2022: Deregulated CDK5 Triggers Neurodegenerative Pathways In Alzheimers Disease Models R-HSA-8862803
Reactome_2022	Nervous System Development R-HSA-9675108	17/545	0.00374554	0.0472057	0	0	2.1812	12.1868	ROBO2;EPHA4;HSPA8;HSP90AA1;HSP90AB1;MYO10;CLSTN1;NTN4;CLTB;CLTA;ARPC5;MYL12B;EFNB2;SDCBP;ABLIM1;ARPC3;EZR	Reactome_2022: Nervous System Development R-HSA-9675108

## Sheet: S8_GSEA Chol_Tissue
Supplementary Dataset 3_S8: GSEA for Cholangiocyte cells in human Tissue. KEGG and REACTOME pathways. Related to Fig. 4 and Extended Data Fig. 8. Filtered for Adjusted P-value < 0.05.
Gene_set	Term	Overlap	P-value	Adjusted P-value	Old P-value	Old Adjusted P-value	Odds Ratio	Combined Score	Genes	label
KEGG_2021_Human	Ribosome	31/158	8.296e-26	1.89978e-23	0	0	17.7608	1025.71	RPL5;RPL3;RPL31;RPL34;RPLP0;RPL11;RPL10A;RPL8;RPL6;RPL7;RPL18A;RPS18;RPL14;RPS3;RPL13;RPL37;RPL15;RPS27A;RPS12;RPL19;RPS9;RPL21;RPS8;RPS6;RPL35A;RPSA;RPS3A;RPS27;RPL24;RPL26;RPS24	KEGG_2021_Human: Ribosome
KEGG_2021_Human	Coronavirus disease	35/232	5.86044e-25	6.7102e-23	0	0	13.0755	729.564	RPL5;RPL3;RPL31;RPL34;RPLP0;RPL11;RPL8;RPL10A;RPL6;RPL7;RPL18A;RPS18;RPL14;RPS3;RPL13;RPL37;RPL15;RPS27A;RPS12;RPL19;JUN;RPS9;RPL21;STAT1;RPS8;RPS6;RPL35A;RPSA;RPS3A;FOS;NFKBIA;RPS27;RPL24;RPL26;RPS24	KEGG_2021_Human: Coronavirus disease
KEGG_2021_Human	Tight junction	16/169	5.70176e-09	4.35234e-07	0	0	7.19764	136.629	MAGI1;JUN;NEDD4L;CLDN1;MYL12A;ACTG1;MYL12B;CLDN10;CLDN4;OCLN;CLDN3;CLDN9;CLDN7;MARVELD3;AMOTL2;CFTR	KEGG_2021_Human: Tight junction
KEGG_2021_Human	Bile secretion	12/90	1.00542e-08	5.75604e-07	0	0	10.4818	193.026	ABCC3;CA2;FXYD2;UGT2A3;ATP1A1;SLC5A1;ATP1B1;SLC4A4;LDLR;NR0B2;CFTR;AQP1	KEGG_2021_Human: Bile secretion
KEGG_2021_Human	Pathogenic Escherichia coli infection	16/197	5.06081e-08	2.31785e-06	0	0	6.07548	102.063	JUN;MYO10;TUBB;FOS;TUBB4B;CLDN1;ACTG1;NFKBIA;CLDN10;CLDN4;OCLN;CLDN3;CLDN9;CLDN7;RPS3;ARF6	KEGG_2021_Human: Pathogenic Escherichia coli infection
KEGG_2021_Human	Proximal tubule bicarbonate reclamation	6/23	8.82271e-07	3.36733e-05	0	0	23.6291	329.407	CA2;FXYD2;ATP1A1;ATP1B1;SLC4A4;AQP1	KEGG_2021_Human: Proximal tubule bicarbonate reclamation
KEGG_2021_Human	Leukocyte transendothelial migration	11/114	1.17754e-06	3.49247e-05	0	0	7.24181	98.8658	CLDN10;CLDN4;OCLN;CLDN3;CLDN9;CLDN7;CYBA;CLDN1;MYL12A;ACTG1;MYL12B	KEGG_2021_Human: Leukocyte transendothelial migration
KEGG_2021_Human	Salmonella infection	16/249	1.22008e-06	3.49247e-05	0	0	4.70701	64.0934	JUN;HSP90AA1;HSP90AB1;ANXA2;TUBB;FOS;TUBB4B;MYL12A;MYL12B;RHOB;ACTG1;NFKBIA;RPS3;S100A10;ARF6;BIRC3	KEGG_2021_Human: Salmonella infection
KEGG_2021_Human	Cell adhesion molecules	12/148	2.4716e-06	6.28884e-05	0	0	5.99387	77.3848	CLDN10;CLDN4;OCLN;CLDN3;SDC4;CDH1;CLDN9;CLDN7;HLA-B;ITGB8;HLA-A;CLDN1	KEGG_2021_Human: Cell adhesion molecules
KEGG_2021_Human	Hepatitis C	12/157	4.57435e-06	0.000104753	0	0	5.61925	69.089	NFKBIA;YWHAE;CLDN10;CLDN4;OCLN;CLDN3;CLDN9;STAT1;CLDN7;EIF3E;CLDN1;LDLR	KEGG_2021_Human: Hepatitis C
KEGG_2021_Human	Fluid shear stress and atherosclerosis	10/139	4.81235e-05	0.00100184	0	0	5.23149	52.0101	JUN;HSP90AA1;HSP90AB1;SDC4;CAV2;DUSP1;GSTP1;CYBA;FOS;ACTG1	KEGG_2021_Human: Fluid shear stress and atherosclerosis
KEGG_2021_Human	IL-17 signaling pathway	8/94	8.50441e-05	0.00162292	0	0	6.24849	58.5629	NFKBIA;CXCL6;HSP90AA1;JUN;HSP90AB1;FOSB;CXCL1;FOS	KEGG_2021_Human: IL-17 signaling pathway
KEGG_2021_Human	Endocytosis	13/252	0.000119095	0.00209791	0	0	3.68832	33.3261	RAB4A;CAV2;HLA-B;NEDD4L;HLA-A;DAB2;RAB11FIP1;EHD4;FGFR4;LDLR;FGFR3;FGFR2;ARF6	KEGG_2021_Human: Endocytosis
KEGG_2021_Human	Leishmaniasis	7/77	0.000156152	0.00255419	0	0	6.69966	58.7204	EEF1A1;NFKBIA;JUN;MARCKSL1;STAT1;CYBA;FOS	KEGG_2021_Human: Leishmaniasis
KEGG_2021_Human	PI3K-Akt signaling pathway	15/354	0.00031723	0.00484304	0	0	3.0059	24.2152	YWHAE;MAGI1;HSP90AA1;HSP90AB1;RPS6;VTN;GNG5;PDGFC;SPP1;ITGB8;FGFR4;FGFR3;FGFR2;BCL2L1;MCL1	KEGG_2021_Human: PI3K-Akt signaling pathway
KEGG_2021_Human	NOD-like receptor signaling pathway	10/181	0.000420671	0.00602085	0	0	3.93809	30.6134	NFKBIA;YWHAE;JUN;HSP90AA1;HSP90AB1;STAT1;CYBA;CXCL1;BCL2L1;BIRC3	KEGG_2021_Human: NOD-like receptor signaling pathway
KEGG_2021_Human	Prostate cancer	7/97	0.000646826	0.00855755	0	0	5.20554	38.2265	NFKBIA;HSP90AA1;HSP90AB1;SPINT1;GSTP1;PDGFC;FGFR2	KEGG_2021_Human: Prostate cancer
KEGG_2021_Human	Carbohydrate digestion and absorption	5/47	0.000672646	0.00855755	0	0	7.93301	57.945	FXYD2;ATP1A1;SLC5A1;SLC37A4;ATP1B1	KEGG_2021_Human: Carbohydrate digestion and absorption
KEGG_2021_Human	Pancreatic secretion	7/102	0.000872702	0.0105184	0	0	4.9303	34.7286	SLC12A2;CA2;FXYD2;ATP1A1;ATP1B1;SLC4A4;CFTR	KEGG_2021_Human: Pancreatic secretion
KEGG_2021_Human	Focal adhesion	10/201	0.000947973	0.010713	0	0	3.52212	24.5181	VTN;JUN;CAV2;PDGFC;SPP1;ITGB8;MYL12A;MYL12B;ACTG1;BIRC3	KEGG_2021_Human: Focal adhesion
KEGG_2021_Human	Gastric acid secretion	6/76	0.000982416	0.010713	0	0	5.72303	39.6348	CA2;KCNJ16;ATP1A1;ATP1B1;CFTR;ACTG1	KEGG_2021_Human: Gastric acid secretion
KEGG_2021_Human	Apoptosis	8/142	0.00138217	0.0143872	0	0	4.00041	26.3391	NFKBIA;JUN;CTSH;FOS;ACTG1;MCL1;BCL2L1;BIRC3	KEGG_2021_Human: Apoptosis
KEGG_2021_Human	Regulation of actin cytoskeleton	10/218	0.00174188	0.0171905	0	0	3.23143	20.5286	TMSB4X;PDGFC;RRAS2;ITGB8;FGFR4;FGFR3;MYL12A;FGFR2;MYL12B;ACTG1	KEGG_2021_Human: Regulation of actin cytoskeleton
KEGG_2021_Human	Human T-cell leukemia virus 1 infection	10/219	0.00180163	0.0171905	0	0	3.21581	20.3209	ELK4;NFKBIA;EGR1;JUN;MMP7;HLA-B;TSPO;HLA-A;FOS;BCL2L1	KEGG_2021_Human: Human T-cell leukemia virus 1 infection
KEGG_2021_Human	Steroid hormone biosynthesis	5/61	0.00220016	0.0195448	0	0	5.94552	36.382	AKR1C1;HSD17B2;AKR1C3;UGT2A3;CYP3A5	KEGG_2021_Human: Steroid hormone biosynthesis
KEGG_2021_Human	Aldosterone-regulated sodium reabsorption	4/37	0.00221906	0.0195448	0	0	8.05364	49.2132	FXYD2;NEDD4L;ATP1A1;ATP1B1	KEGG_2021_Human: Aldosterone-regulated sodium reabsorption
KEGG_2021_Human	Kaposi sarcoma-associated herpesvirus infection	9/193	0.0026166	0.0221926	0	0	3.28037	19.5047	NFKBIA;JUN;GNG5;STAT1;HLA-B;CXCL1;HLA-A;FOS;RPS27A	KEGG_2021_Human: Kaposi sarcoma-associated herpesvirus infection
KEGG_2021_Human	Lipid and atherosclerosis	9/215	0.0053114	0.0421969	0	0	2.92673	15.3299	NFKBIA;JUN;HSP90AA1;HSP90AB1;CYBA;CXCL1;FOS;LDLR;BCL2L1	KEGG_2021_Human: Lipid and atherosclerosis
KEGG_2021_Human	cAMP signaling pathway	9/216	0.00547158	0.0421969	0	0	2.91245	15.1686	NFKBIA;JUN;FXYD2;RRAS2;SOX9;FOS;ATP1A1;ATP1B1;CFTR	KEGG_2021_Human: cAMP signaling pathway
KEGG_2021_Human	Th17 cell differentiation	6/107	0.00552798	0.0421969	0	0	3.96019	20.5848	NFKBIA;JUN;HSP90AA1;HSP90AB1;STAT1;FOS	KEGG_2021_Human: Th17 cell differentiation
KEGG_2021_Human	Pathways in cancer	16/531	0.00669638	0.0492346	0	0	2.09873	10.5066	JUN;HSP90AA1;HSP90AB1;STAT1;GSTP1;FOS;AGT;NFKBIA;BMP2;GNG5;CDH1;FGFR4;FGFR3;FGFR2;BCL2L1;BIRC3	KEGG_2021_Human: Pathways in cancer
KEGG_2021_Human	TNF signaling pathway	6/112	0.00687994	0.0492346	0	0	3.77243	18.7835	NFKBIA;CXCL6;JUN;CXCL1;FOS;BIRC3	KEGG_2021_Human: TNF signaling pathway
Reactome_2022	Peptide Chain Elongation R-HSA-156902	29/86	1.0232e-31	9.38271e-29	0	0	36.8775	2631.48	RPL5;RPL3;RPL31;RPL34;RPLP0;RPL11;RPL10A;RPL8;RPL6;RPL7;RPL18A;RPL14;RPS3;RPL37;RPL15;RPS27A;RPS12;RPL19;RPS9;RPL21;RPS8;RPS6;RPL35A;RPS3A;RPSA;EEF1A1;RPS27;RPL26;RPS24	Reactome_2022: Peptide Chain Elongation R-HSA-156902
Reactome_2022	Eukaryotic Translation Elongation R-HSA-156842	29/90	4.75219e-31	2.17888e-28	0	0	34.4523	2405.51	RPL5;RPL3;RPL31;RPL34;RPLP0;RPL11;RPL10A;RPL8;RPL6;RPL7;RPL18A;RPL14;RPS3;RPL37;RPL15;RPS27A;RPS12;RPL19;RPS9;RPL21;RPS8;RPS6;RPL35A;RPS3A;RPSA;EEF1A1;RPS27;RPL26;RPS24	Reactome_2022: Eukaryotic Translation Elongation R-HSA-156842
Reactome_2022	L13a-mediated Translational Silencing Of Ceruloplasmin Expression R-HSA-156827	30/108	6.87838e-30	1.43145e-27	0	0	27.9516	1876.92	EIF4A2;RPL5;RPL3;RPL31;RPL34;RPLP0;RPL11;RPL10A;RPL8;RPL6;RPL7;RPL18A;RPL14;RPS3;RPL37;RPL15;RPS27A;RPS12;RPL19;RPS9;RPL21;RPS8;RPS6;RPL35A;RPSA;RPS3A;RPS27;EIF3E;RPL26;RPS24	Reactome_2022: L13a-mediated Translational Silencing Of Ceruloplasmin Expression R-HSA-156827
Reactome_2022	Formation Of A Pool Of Free 40S Subunits R-HSA-72689	29/98	8.04692e-30	1.43145e-27	0	0	30.4454	2039.61	RPL5;RPL3;RPL31;RPL34;RPLP0;RPL11;RPL10A;RPL8;RPL6;RPL7;RPL18A;RPL14;RPS3;RPL37;RPL15;RPS27A;RPS12;RPL19;RPS9;RPL21;RPS8;RPS6;RPL35A;RPSA;RPS3A;RPS27;EIF3E;RPL26;RPS24	Reactome_2022: Formation Of A Pool Of Free 40S Subunits R-HSA-72689
Reactome_2022	Response Of EIF2AK4 (GCN2) To Amino Acid Deficiency R-HSA-9633012	29/98	8.04692e-30	1.43145e-27	0	0	30.4454	2039.61	RPL5;RPL3;RPL31;RPL34;RPLP0;RPL11;RPL10A;RPL8;RPL6;RPL7;RPL18A;RPL14;RPS3;RPL37;RPL15;RPS27A;RPS12;RPL19;RPS9;RPL21;RPS8;RPS6;RPL35A;RPSA;RPS3A;RPS27;RPL26;ATF3;RPS24	Reactome_2022: Response Of EIF2AK4 (GCN2) To Amino Acid Deficiency R-HSA-9633012
Reactome_2022	GTP Hydrolysis And Joining Of 60S Ribosomal Subunit R-HSA-72706	30/109	9.3661e-30	1.43145e-27	0	0	27.5963	1844.55	EIF4A2;RPL5;RPL3;RPL31;RPL34;RPLP0;RPL11;RPL10A;RPL8;RPL6;RPL7;RPL18A;RPL14;RPS3;RPL37;RPL15;RPS27A;RPS12;RPL19;RPS9;RPL21;RPS8;RPS6;RPL35A;RPSA;RPS3A;RPS27;EIF3E;RPL26;RPS24	Reactome_2022: GTP Hydrolysis And Joining Of 60S Ribosomal Subunit R-HSA-72706
Reactome_2022	Eukaryotic Translation Termination R-HSA-72764	28/90	1.60784e-29	1.63821e-27	0	0	32.6058	2161.77	RPL5;RPL3;RPL31;RPL34;RPLP0;RPL11;RPL10A;RPL8;RPL6;RPL7;RPL18A;RPL14;RPS3;RPL37;RPL15;RPS27A;RPS12;RPL19;RPS9;RPL21;RPS8;RPS6;RPL35A;RPS3A;RPSA;RPS27;RPL26;RPS24	Reactome_2022: Eukaryotic Translation Termination R-HSA-72764
Reactome_2022	Selenocysteine Synthesis R-HSA-2408557	28/90	1.60784e-29	1.63821e-27	0	0	32.6058	2161.77	RPL5;RPL3;RPL31;RPL34;RPLP0;RPL11;RPL10A;RPL8;RPL6;RPL7;RPL18A;RPL14;RPS3;RPL37;RPL15;RPS27A;RPS12;RPL19;RPS9;RPL21;RPS8;RPS6;RPL35A;RPS3A;RPSA;RPS27;RPL26;RPS24	Reactome_2022: Selenocysteine Synthesis R-HSA-2408557
Reactome_2022	Viral mRNA Translation R-HSA-192823	28/90	1.60784e-29	1.63821e-27	0	0	32.6058	2161.77	RPL5;RPL3;RPL31;RPL34;RPLP0;RPL11;RPL10A;RPL8;RPL6;RPL7;RPL18A;RPL14;RPS3;RPL37;RPL15;RPS27A;RPS12;RPL19;RPS9;RPL21;RPS8;RPS6;RPL35A;RPS3A;RPSA;RPS27;RPL26;RPS24	Reactome_2022: Viral mRNA Translation R-HSA-192823
Reactome_2022	Nonsense Mediated Decay (NMD) Independent Of Exon Junction Complex (EJC) R-HSA-975956	28/92	3.25125e-29	2.98139e-27	0	0	31.5836	2071.76	RPL5;RPL3;RPL31;RPL34;RPLP0;RPL11;RPL10A;RPL8;RPL6;RPL7;RPL18A;RPL14;RPS3;RPL37;RPL15;RPS27A;RPS12;RPL19;RPS9;RPL21;RPS8;RPS6;RPL35A;RPS3A;RPSA;RPS27;RPL26;RPS24	Reactome_2022: Nonsense Mediated Decay (NMD) Independent Of Exon Junction Complex (EJC) R-HSA-975956
Reactome_2022	Cap-dependent Translation Initiation R-HSA-72737	30/116	7.41091e-29	6.17801e-27	0	0	25.3411	1641.39	EIF4A2;RPL5;RPL3;RPL31;RPL34;RPLP0;RPL11;RPL10A;RPL8;RPL6;RPL7;RPL18A;RPL14;RPS3;RPL37;RPL15;RPS27A;RPS12;RPL19;RPS9;RPL21;RPS8;RPS6;RPL35A;RPSA;RPS3A;RPS27;EIF3E;RPL26;RPS24	Reactome_2022: Cap-dependent Translation Initiation R-HSA-72737
Reactome_2022	Selenoamino Acid Metabolism R-HSA-2408522	29/114	1.06746e-27	8.15716e-26	0	0	24.6944	1533.63	RPL5;RPL3;RPL31;RPL34;RPLP0;RPL11;RPL10A;RPL8;RPL6;RPL7;RPL18A;VSIG2;RPL14;RPS3;RPL37;RPL15;RPS27A;RPS12;RPL19;RPS9;RPL21;RPS8;RPS6;RPL35A;RPSA;RPS3A;RPS27;RPL26;RPS24	Reactome_2022: Selenoamino Acid Metabolism R-HSA-2408522
Reactome_2022	SRP-dependent Cotranslational Protein Targeting To Membrane R-HSA-1799339	28/108	4.96608e-27	3.503e-25	0	0	25.2463	1529.1	RPL5;RPL3;RPL31;RPL34;RPLP0;RPL11;RPL10A;RPL8;RPL6;RPL7;RPL18A;RPL14;RPS3;RPL37;RPL15;RPS27A;RPS12;RPL19;RPS9;RPL21;RPS8;RPS6;RPL35A;RPSA;RPS3A;RPS27;RPL26;RPS24	Reactome_2022: SRP-dependent Cotranslational Protein Targeting To Membrane R-HSA-1799339
Reactome_2022	Nonsense Mediated Decay (NMD) Enhanced By Exon Junction Complex (EJC) R-HSA-975957	28/112	1.51597e-26	9.9296e-25	0	0	24.0392	1429.16	RPL5;RPL3;RPL31;RPL34;RPLP0;RPL11;RPL10A;RPL8;RPL6;RPL7;RPL18A;RPL14;RPS3;RPL37;RPL15;RPS27A;RPS12;RPL19;RPS9;RPL21;RPS8;RPS6;RPL35A;RPSA;RPS3A;RPS27;RPL26;RPS24	Reactome_2022: Nonsense Mediated Decay (NMD) Enhanced By Exon Junction Complex (EJC) R-HSA-975957
Reactome_2022	Influenza Viral RNA Transcription And Replication R-HSA-168273	29/137	3.3001e-25	2.01746e-23	0	0	19.4126	1094.3	RPL5;RPL3;RPL31;RPL34;RPLP0;RPL11;RPL10A;RPL8;RPL6;RPL7;RPL18A;RPL14;RPS3;RPL37;RPL15;RPS27A;RPS12;RPL19;RPS9;HSP90AA1;RPL21;RPS8;RPS6;RPL35A;RPSA;RPS3A;RPS27;RPL26;RPS24	Reactome_2022: Influenza Viral RNA Transcription And Replication R-HSA-168273
Reactome_2022	Cellular Response To Starvation R-HSA-9711097	29/153	9.39829e-24	5.3864e-22	0	0	16.8939	895.742	RPL5;RPL3;RPL31;RPL34;RPLP0;RPL11;RPL10A;RPL8;RPL6;RPL7;RPL18A;RPL14;RPS3;RPL37;RPL15;RPS27A;RPS12;RPL19;RPS9;RPL21;RPS8;RPS6;RPL35A;RPSA;RPS3A;RPS27;RPL26;ATF3;RPS24	Reactome_2022: Cellular Response To Starvation R-HSA-9711097
Reactome_2022	Influenza Infection R-HSA-168255	29/157	2.03524e-23	1.09783e-21	0	0	16.3627	854.93	RPL5;RPL3;RPL31;RPL34;RPLP0;RPL11;RPL10A;RPL8;RPL6;RPL7;RPL18A;RPL14;RPS3;RPL37;RPL15;RPS27A;RPS12;RPL19;RPS9;HSP90AA1;RPL21;RPS8;RPS6;RPL35A;RPSA;RPS3A;RPS27;RPL26;RPS24	Reactome_2022: Influenza Infection R-HSA-168255
Reactome_2022	Regulation Of Expression Of SLITs And ROBOs R-HSA-9010553	28/167	1.9175e-21	9.76861e-20	0	0	14.4866	691.056	RPL5;RPL3;RPL31;RPL34;RPLP0;RPL11;RPL10A;RPL8;RPL6;RPL7;RPL18A;RPL14;RPS3;RPL37;RPL15;RPS27A;RPS12;RPL19;RPS9;RPL21;RPS8;RPS6;RPL35A;RPSA;RPS3A;RPS27;RPL26;RPS24	Reactome_2022: Regulation Of Expression Of SLITs And ROBOs R-HSA-9010553
Reactome_2022	Major Pathway Of rRNA Processing In Nucleolus And Cytosol R-HSA-6791226	28/179	1.35253e-20	6.52775e-19	0	0	13.3271	609.713	RPL5;RPL3;RPL31;RPL34;RPLP0;RPL11;RPL10A;RPL8;RPL6;RPL7;RPL18A;RPL14;RPS3;RPL37;RPL15;RPS27A;RPS12;RPL19;RPS9;RPL21;RPS8;RPS6;RPL35A;RPSA;RPS3A;RPS27;RPL26;RPS24	Reactome_2022: Major Pathway Of rRNA Processing In Nucleolus And Cytosol R-HSA-6791226
Reactome_2022	rRNA Processing In Nucleus And Cytosol R-HSA-8868773	28/189	6.14373e-20	2.8169e-18	0	0	12.493	552.642	RPL5;RPL3;RPL31;RPL34;RPLP0;RPL11;RPL10A;RPL8;RPL6;RPL7;RPL18A;RPL14;RPS3;RPL37;RPL15;RPS27A;RPS12;RPL19;RPS9;RPL21;RPS8;RPS6;RPL35A;RPSA;RPS3A;RPS27;RPL26;RPS24	Reactome_2022: rRNA Processing In Nucleus And Cytosol R-HSA-8868773
Reactome_2022	rRNA Processing R-HSA-72312	28/199	2.54623e-19	1.11186e-17	0	0	11.7564	503.343	RPL5;RPL3;RPL31;RPL34;RPLP0;RPL11;RPL8;RPL10A;RPL6;RPL7;RPL18A;RPL14;RPS3;RPL37;RPL15;RPS27A;RPS12;RPL19;RPS9;RPL21;RPS8;RPS6;RPL35A;RPSA;RPS3A;RPS27;RPL26;RPS24	Reactome_2022: rRNA Processing R-HSA-72312
Reactome_2022	Translation R-HSA-72766	32/281	4.16155e-19	1.73461e-17	0	0	9.32734	394.763	EIF4A2;RPL5;RPL3;RPL31;RPL34;RPLP0;RPL11;RPL8;RPL10A;RPL6;RPL7;RPL18A;RPL14;RPS3;RPL37;RPL15;RPS27A;RPS12;RPL19;RPS9;RPL21;RPS8;RPS6;RPL35A;RPSA;RPS3A;EEF1A1;RPS27;PPA1;EIF3E;RPL26;RPS24	Reactome_2022: Translation R-HSA-72766
Reactome_2022	Signaling By ROBO Receptors R-HSA-376176	28/209	9.72189e-19	3.87607e-17	0	0	11.1012	460.417	RPL5;RPL3;RPL31;RPL34;RPLP0;RPL11;RPL8;RPL10A;RPL6;RPL7;RPL18A;RPL14;RPS3;RPL37;RPL15;RPS27A;RPS12;RPL19;RPS9;RPL21;RPS8;RPS6;RPL35A;RPSA;RPS3A;RPS27;RPL26;RPS24	Reactome_2022: Signaling By ROBO Receptors R-HSA-376176
Reactome_2022	Metabolism Of Amino Acids And Derivatives R-HSA-71291	33/364	1.16793e-16	4.46245e-15	0	0	7.23239	265.328	RPL5;RPL3;RPL31;RPL34;RPL11;RPLP0;RPL8;RPL10A;RPL6;RPL7;RPL18A;VSIG2;RPL14;RPS3;PHGDH;RPL15;RPL37;RPS27A;GLUL;RPL19;RPS12;RPS9;RPL21;TSTD1;RPS8;RPS6;RPL35A;RPSA;RPS3A;RPS27;RPL26;SERINC2;RPS24	Reactome_2022: Metabolism Of Amino Acids And Derivatives R-HSA-71291
Reactome_2022	Nervous System Development R-HSA-9675108	38/545	2.96463e-15	1.08743e-13	0	0	5.49057	183.671	GRB7;RPL5;RPL3;HSP90AB1;RPL31;RPL34;RPL11;RPLP0;RPL8;RPL10A;MYL12A;RPL6;MYL12B;RPL7;ACTG1;RPL18A;RPL14;RPS3;RPL15;RPL37;RPS27A;RPL19;RPS12;WWTR1;RPS9;HSP90AA1;SEMA6A;RPL21;MYO10;RPS8;RPS6;RPL35A;RPSA;RPS3A;RHOB;RPS27;RPL26;RPS24	Reactome_2022: Nervous System Development R-HSA-9675108
Reactome_2022	Axon Guidance R-HSA-422475	37/519	3.52604e-15	1.24361e-13	0	0	5.60928	186.669	GRB7;RPL5;RPL3;HSP90AB1;RPL31;RPL34;RPL11;RPLP0;RPL8;RPL10A;MYL12A;RPL6;MYL12B;RPL7;ACTG1;RPL18A;RPL14;RPS3;RPL15;RPL37;RPS27A;RPL19;RPS12;RPS9;HSP90AA1;SEMA6A;RPL21;MYO10;RPS8;RPS6;RPL35A;RPSA;RPS3A;RHOB;RPS27;RPL26;RPS24	Reactome_2022: Axon Guidance R-HSA-422475
Reactome_2022	Developmental Biology R-HSA-1266738	51/1073	2.00365e-13	6.80499e-12	0	0	3.74326	109.448	RPL5;RPL3;HSP90AB1;RPL31;RPL34;RPLP0;ONECUT1;RPL8;RPL10A;RPL6;RPL7;ACTG1;HHEX;RPL18A;PRSS8;RPL37;SOX9;RPS12;RPS9;HSP90AA1;SEMA6A;RPL21;RPS8;RPS6;KRT8;KRT7;RPSA;RPS3A;RHOB;DSG2;RPL26;GRB7;RPL11;MYL12A;MYL12B;PERP;RPL14;RPS3;RPL15;RPS27A;RPL19;WWTR1;ST14;JUN;MYO10;RPL35A;KRT19;RPS27;KRT18;KLF5;RPS24	Reactome_2022: Developmental Biology R-HSA-1266738
Reactome_2022	Cellular Responses To Stress R-HSA-2262752	40/722	9.75533e-13	3.19487e-11	0	0	4.2901	118.646	PPP1R15A;YWHAE;RPL5;RPL3;HSP90AB1;RPL31;RPL34;GSTP1;RPL11;RPLP0;RPL8;RPL10A;RPL6;RPL7;RPL18A;RPL14;RPS3;PHGDH;RPL15;RPL37;RPS27A;RPL19;RPS12;JUN;RPS9;HSP90AA1;RPL21;RPS8;RPS6;RPL35A;RPSA;CYBA;RPS3A;FOS;EEF1A1;RPS27;ALB;RPL26;ATF3;RPS24	Reactome_2022: Cellular Responses To Stress R-HSA-2262752
Reactome_2022	Cellular Responses To Stimuli R-HSA-8953897	40/736	1.78738e-12	5.65183e-11	0	0	4.20071	113.63	PPP1R15A;YWHAE;RPL5;RPL3;HSP90AB1;RPL31;RPL34;GSTP1;RPL11;RPLP0;RPL8;RPL10A;RPL6;RPL7;RPL18A;RPL14;RPS3;PHGDH;RPL15;RPL37;RPS27A;RPL19;RPS12;JUN;RPS9;HSP90AA1;RPL21;RPS8;RPS6;RPL35A;RPSA;CYBA;RPS3A;FOS;EEF1A1;RPS27;ALB;RPL26;ATF3;RPS24	Reactome_2022: Cellular Responses To Stimuli R-HSA-8953897
Reactome_2022	Infectious Disease R-HSA-5663205	45/961	1.05477e-11	3.22409e-10	0	0	3.6188	91.4656	YWHAE;RPL5;RPL3;HSP90AB1;SDC4;RPL31;RPL34;RPL11;RPLP0;NEDD4L;RPL8;RPL10A;RPL6;RPL7;ACTG1;GNG5;RPL18A;RPL14;RPS3;RPL15;RPL37;RPS27A;RPL19;RPS12;JUN;NPM1;RPS9;HSP90AA1;RPL21;MYO10;STAT1;RPS8;TUBB;RPS6;HLA-B;RPL35A;RPSA;CYBA;RPS3A;HLA-A;ATP1B1;RPS27;FXYD2;RPL26;RPS24	Reactome_2022: Infectious Disease R-HSA-5663205
Reactome_2022	Ribosomal Scanning And Start Codon Recognition R-HSA-72702	12/57	4.0341e-11	1.15602e-09	0	0	18.1991	435.57	EIF4A2;RPS9;RPS27;RPS8;RPS6;RPS3;RPS3A;RPSA;EIF3E;RPS27A;RPS24;RPS12	Reactome_2022: Ribosomal Scanning And Start Codon Recognition R-HSA-72702
Reactome_2022	Translation Initiation Complex Formation R-HSA-72649	12/57	4.0341e-11	1.15602e-09	0	0	18.1991	435.57	EIF4A2;RPS9;RPS27;RPS8;RPS6;RPS3;RPS3A;RPSA;EIF3E;RPS27A;RPS24;RPS12	Reactome_2022: Translation Initiation Complex Formation R-HSA-72649
Reactome_2022	mRNA Activation Upon Binding Of Cap-Binding Complex And eIFs, Subsequent Binding To 43S R-HSA-72662	12/58	5.01896e-11	1.39466e-09	0	0	17.8025	422.191	EIF4A2;RPS9;RPS27;RPS8;RPS6;RPS3;RPS3A;RPSA;EIF3E;RPS27A;RPS24;RPS12	Reactome_2022: mRNA Activation Upon Binding Of Cap-Binding Complex And eIFs, Subsequent Binding To 43S R-HSA-72662
Reactome_2022	Formation Of Ternary Complex, And Subsequently, 43S Complex R-HSA-72695	11/50	1.59993e-10	4.3151e-09	0	0	19.1883	432.809	RPS9;RPS27;RPS8;RPS6;RPS3;RPS3A;RPSA;EIF3E;RPS27A;RPS24;RPS12	Reactome_2022: Formation Of Ternary Complex, And Subsequently, 43S Complex R-HSA-72695
Reactome_2022	Metabolism Of RNA R-HSA-8953854	34/666	4.94545e-10	1.29571e-08	0	0	3.85643	82.6332	EIF4A2;RPL5;SET;RPL3;RPL31;RPL34;RPL11;RPLP0;RPL8;RPL10A;RPL6;RPL7;RPL18A;RPL14;RPS3;RPL15;RPL37;IGF2BP2;RPS27A;HNRNPA1;RPL19;RPS12;HNRNPA0;RPS9;SNRPN;RPL21;RPS8;RPS6;RPL35A;RPSA;RPS3A;RPS27;RPL26;RPS24	Reactome_2022: Metabolism Of RNA R-HSA-8953854
Reactome_2022	SARS-CoV-2 Modulates Host Translation Machinery R-HSA-9754678	10/47	1.5742e-09	4.00983e-08	0	0	18.3253	371.444	RPS9;RPS27;RPS8;RPS6;RPS3;RPS3A;RPSA;RPS27A;RPS24;RPS12	Reactome_2022: SARS-CoV-2 Modulates Host Translation Machinery R-HSA-9754678
Reactome_2022	Disease R-HSA-1643685	59/1736	1.89083e-09	4.6862e-08	0	0	2.63105	52.8479	YWHAE;APP;RPL5;RPL3;HSP90AB1;RPL31;RPL34;RPLP0;RPL8;RPL10A;SLC4A4;RPL6;RPL7;ACTG1;RPL18A;RPL37;SLC37A4;RPS12;RPS9;HSP90AA1;RPL21;TPM4;RPS8;TUBB;RPS6;HLA-B;RPSA;CYBA;RPS3A;HLA-A;ATP1B1;SLPI;AKAP9;RPL26;CFTR;SDC4;RPL11;NEDD4L;SLC5A1;GNG5;RPL14;RPS3;RPL15;RPS27A;RPL19;MUC6;JUN;NPM1;MYO10;STAT1;RPL35A;NFKBIA;RPS27;FXYD2;FGFR4;FGFR3;RPS24;FGFR2;BCL2L1	Reactome_2022: Disease R-HSA-1643685
Reactome_2022	SARS-CoV-2-host Interactions R-HSA-9705683	16/196	4.71273e-08	1.13726e-06	0	0	6.10955	103.071	YWHAE;RPS9;HSP90AA1;HSP90AB1;STAT1;RPS8;RPS6;HLA-B;RPSA;RPS3A;HLA-A;RPS27;RPS3;RPS27A;RPS24;RPS12	Reactome_2022: SARS-CoV-2-host Interactions R-HSA-9705683
Reactome_2022	Metabolism Of Proteins R-HSA-392499	57/1890	2.39791e-07	5.63815e-06	0	0	2.28643	34.8532	EIF4A2;APP;RPL5;CPM;RPL3;SERPINA1;RPL31;RPL34;RPLP0;RPL8;RPL10A;RPL6;RPL7;RPL18A;ANPEP;CTSH;PMEPA1;RPL37;RPS12;RPS9;RPL21;RPS8;TUBB;RPS6;HLA-B;RPSA;RPS3A;HLA-A;EEF1A1;SLPI;PPA1;RPL26;KIFC3;CHST4;CFTR;BIRC3;RPL11;GNG5;RAB25;RPL14;RPS3;GCNT4;CD59;RPL15;RPS27A;RPL19;MUC6;NPM1;RAB4A;GOLM1;RPL35A;TUBB4B;NFKBIA;RPS27;ALB;EIF3E;RPS24	Reactome_2022: Metabolism Of Proteins R-HSA-392499
Reactome_2022	Chaperone Mediated Autophagy R-HSA-9613829	6/20	3.51849e-07	8.06613e-06	0	0	28.6968	426.436	EEF1A1;HSP90AA1;HSP90AB1;LAMP2;RPS27A;CFTR	Reactome_2022: Chaperone Mediated Autophagy R-HSA-9613829
Reactome_2022	Metabolism R-HSA-1430728	59/2049	6.6761e-07	1.49317e-05	0	0	2.17872	30.9804	RPL5;SLC44A3;RPL3;HSP90AB1;RPL31;RPL34;RPLP0;RPL8;RPL10A;RPL6;RPL7;RPL18A;CA2;VSIG2;MPC2;TSPO;UGT2A3;PHGDH;RPL37;SLC37A4;GLUL;RPS12;ABCC3;CHST9;RPS9;HSP90AA1;RPL21;TSTD1;RPS8;RPS6;RPSA;RPS3A;ALDH3A2;PPA1;RPL26;PLPP2;SDC4;GSTP1;RPL11;HSD17B11;CYP3A5;GNG5;HSD17B2;RPL14;RPS3;RPL15;RPS27A;GC;LDLR;RPL19;RAB4A;AKR1C1;AKR1C3;RPL35A;RPS27;HOOK2;ALB;SERINC2;RPS24	Reactome_2022: Metabolism R-HSA-1430728
Reactome_2022	SARS-CoV Infections R-HSA-9679506	20/369	8.52469e-07	1.86122e-05	0	0	3.9605	55.3485	YWHAE;RPS9;HSP90AA1;HSP90AB1;SDC4;STAT1;RPS8;TUBB;RPS6;HLA-B;RPSA;RPS3A;HLA-A;ATP1B1;RPS27;FXYD2;RPS3;RPS27A;RPS24;RPS12	Reactome_2022: SARS-CoV Infections R-HSA-9679506
Reactome_2022	SARS-CoV-2 Infection R-HSA-9694516	17/283	1.43505e-06	3.06032e-05	0	0	4.38877	59.0479	YWHAE;RPS9;HSP90AA1;HSP90AB1;SDC4;STAT1;RPS8;RPS6;HLA-B;RPSA;RPS3A;HLA-A;RPS27;RPS3;RPS27A;RPS24;RPS12	Reactome_2022: SARS-CoV-2 Infection R-HSA-9694516
Reactome_2022	Innate Immune System R-HSA-168249	36/1035	2.40056e-06	5.00298e-05	0	0	2.55269	33.0313	APP;SERPINA1;HSP90AB1;GSTP1;DEFB1;CXCL1;CLU;ACTG1;VTN;SYNGR1;ANPEP;LAMP2;CTSH;CD59;RPS27A;S100A11;MUC6;JUN;HSP90AA1;ANXA2;MYO10;TUBB;AKR1C1;HLA-B;CYBA;HLA-A;FOS;TUBB4B;VAMP8;EEF1A1;NFKBIA;SLPI;POLR1D;CD47;BCL2L1;BIRC3	Reactome_2022: Innate Immune System R-HSA-168249
Reactome_2022	Tight Junction Interactions R-HSA-420029	6/30	4.7507e-06	9.68086e-05	0	0	16.7313	205.079	CLDN10;CLDN4;CLDN3;CLDN9;CLDN7;CLDN1	Reactome_2022: Tight Junction Interactions R-HSA-420029
Reactome_2022	Neutrophil Degranulation R-HSA-6798695	21/468	8.85384e-06	0.000176499	0	0	3.24195	37.719	HSP90AA1;SERPINA1;HSP90AB1;ANXA2;TUBB;GSTP1;HLA-B;CYBA;CXCL1;HLA-A;TUBB4B;VAMP8;EEF1A1;SYNGR1;SLPI;ANPEP;LAMP2;CTSH;CD59;CD47;S100A11	Reactome_2022: Neutrophil Degranulation R-HSA-6798695
Reactome_2022	Signaling By TGF-beta Receptor Complex R-HSA-170834	9/91	9.10682e-06	0.00017768	0	0	7.3993	85.8798	TGIF1;PPP1R15A;WWTR1;STAT1;BAMBI;ITGB8;PMEPA1;NEDD4L;RPS27A	Reactome_2022: Signaling By TGF-beta Receptor Complex R-HSA-170834
Reactome_2022	Signaling By TGFB Family Members R-HSA-9006936	10/119	1.2503e-05	0.00023886	0	0	6.19772	69.9694	TGIF1;PPP1R15A;WWTR1;BMP2;BAMBI;STAT1;NEDD4L;ITGB8;PMEPA1;RPS27A	Reactome_2022: Signaling By TGFB Family Members R-HSA-9006936
Reactome_2022	Downregulation Of TGF-beta Receptor Signaling R-HSA-2173788	5/26	3.7302e-05	0.00069808	0	0	15.883	161.95	PPP1R15A;BAMBI;NEDD4L;PMEPA1;RPS27A	Reactome_2022: Downregulation Of TGF-beta Receptor Signaling R-HSA-2173788
Reactome_2022	TGF-beta Receptor Signaling Activates SMADs R-HSA-2173789	6/44	4.73504e-05	0.000868406	0	0	10.5596	105.152	PPP1R15A;BAMBI;NEDD4L;ITGB8;PMEPA1;RPS27A	Reactome_2022: TGF-beta Receptor Signaling Activates SMADs R-HSA-2173789
Reactome_2022	Signal Transduction R-HSA-162582	61/2465	5.0742e-05	0.000912362	0	0	1.8363	18.1587	YWHAE;APP;CXCL6;HSP90AB1;CXCL1;SPINT2;ACTG1;RGS3;PMEPA1;ITGB8;SOX9;SOX4;TGIF1;HSP90AA1;MMP7;TPM4;RPS6;RRAS2;CYBA;FOS;ETV4;RHOB;ALDH3A2;ARL4C;SPINT1;ELF3;CDC42EP1;DSG2;CFTR;ARF6;BIRC3;PPP1R15A;GRB7;NEDD4L;MYL12B;GNG5;PDGFC;RPS27A;HNRNPA1;IL32;WWTR1;EGR1;FARP1;JUN;RAB4A;HOMER2;STAT1;CAV2;AKR1C3;NFKBIA;EEPD1;BMP2;RPS27;BAMBI;FOSB;AMOTL2;FGFR4;CCL28;FGFR3;FGFR2;BCL2L1	Reactome_2022: Signal Transduction R-HSA-162582
Reactome_2022	Hemostasis R-HSA-109582	22/576	6.31935e-05	0.00111439	0	0	2.73493	26.4449	APP;GRB7;SERPINA1;CXADR;ANXA2;SDC4;ANXA5;KIF12;ATP1B1;CLU;SERPINA4;RHOB;SERPINA5;KIF9;GNG5;EPCAM;TMSB4X;LAMP2;MAFF;ALB;CD47;S100A10	Reactome_2022: Hemostasis R-HSA-109582
Reactome_2022	Downregulation Of SMAD2/3:SMAD4 Transcriptional Activity R-HSA-2173795	5/31	9.06153e-05	0.00156782	0	0	12.8253	119.389	TGIF1;WWTR1;STAT1;NEDD4L;RPS27A	Reactome_2022: Downregulation Of SMAD2/3:SMAD4 Transcriptional Activity R-HSA-2173795
Reactome_2022	Cell-cell Junction Organization R-HSA-421270	6/61	0.000300929	0.00511022	0	0	7.28942	59.1073	CLDN10;CLDN4;CLDN3;CLDN9;CLDN7;CLDN1	Reactome_2022: Cell-cell Junction Organization R-HSA-421270
Reactome_2022	Signaling By Nuclear Receptors R-HSA-9006931	12/260	0.000591073	0.00985479	0	0	3.26815	24.294	ARL4C;EEPD1;JUN;HSP90AA1;HSP90AB1;MMP7;GNG5;CAV2;AKR1C3;FOSB;PMEPA1;FOS	Reactome_2022: Signaling By Nuclear Receptors R-HSA-9006931
Reactome_2022	Platelet Degranulation R-HSA-114608	8/125	0.000602757	0.00987015	0	0	4.58565	33.998	APP;SERPINA1;TMSB4X;LAMP2;ALB;ANXA5;CLU;SERPINA4	Reactome_2022: Platelet Degranulation R-HSA-114608
Reactome_2022	Immune System R-HSA-168256	47/1943	0.000704324	0.011331	0	0	1.74444	12.6616	EIF4A2;APP;SERPINA1;HSP90AB1;GSTP1;RPLP0;IL20RA;NEDD4L;DEFB1;CXCL1;CLU;ACTG1;VTN;SYNGR1;ANPEP;RNF19A;LAMP2;CTSH;CD59;RPS27A;S100A11;MUC6;MCL1;IL32;EGR1;JUN;HSP90AA1;CXADR;ANXA2;TNFRSF12A;MYO10;STAT1;TUBB;AKR1C1;HLA-B;CYBA;HLA-A;FOS;TUBB4B;VAMP8;EEF1A1;NFKBIA;SLPI;POLR1D;CD47;BCL2L1;BIRC3	Reactome_2022: Immune System R-HSA-168256
Reactome_2022	Response To Elevated Platelet Cytosolic Ca2+ R-HSA-76005	8/130	0.000780582	0.0123413	0	0	4.39659	31.4596	APP;SERPINA1;TMSB4X;LAMP2;ALB;ANXA5;CLU;SERPINA4	Reactome_2022: Response To Elevated Platelet Cytosolic Ca2+ R-HSA-76005
Reactome_2022	HSF1 Activation R-HSA-3371511	4/29	0.000876664	0.0136254	0	0	10.6351	74.8648	YWHAE;EEF1A1;HSP90AA1;HSP90AB1	Reactome_2022: HSF1 Activation R-HSA-3371511
Reactome_2022	Transcriptional Activity Of SMAD2/SMAD3:SMAD4 Heterotrimer R-HSA-2173793	5/51	0.000981063	0.0149939	0	0	7.24171	50.1624	TGIF1;WWTR1;STAT1;NEDD4L;RPS27A	Reactome_2022: Transcriptional Activity Of SMAD2/SMAD3:SMAD4 Heterotrimer R-HSA-2173793
Reactome_2022	Signaling By Receptor Tyrosine Kinases R-HSA-9006934	17/496	0.00141633	0.0212914	0	0	2.41048	15.812	EGR1;GRB7;RAB4A;HSP90AA1;STAT1;CYBA;SPINT2;FOS;SPINT1;PDGFC;FOSB;RPS27A;FGFR4;HNRNPA1;FGFR3;FGFR2;ARF6	Reactome_2022: Signaling By Receptor Tyrosine Kinases R-HSA-9006934
Reactome_2022	Cell Junction Organization R-HSA-446728	6/86	0.00186549	0.0275912	0	0	5.0051	31.4532	CLDN10;CLDN4;CLDN3;CLDN9;CLDN7;CLDN1	Reactome_2022: Cell Junction Organization R-HSA-446728
Reactome_2022	Regulation Of PLK1 Activity At G2/M Transition R-HSA-2565942	6/87	0.00197893	0.0288044	0	0	4.94306	30.7715	YWHAE;HSP90AA1;TUBB;AKAP9;RPS27A;TUBB4B	Reactome_2022: Regulation Of PLK1 Activity At G2/M Transition R-HSA-2565942
Reactome_2022	Signaling By MST1 R-HSA-8852405	2/5	0.00217648	0.0306408	0	0	44.0649	270.12	SPINT1;SPINT2	Reactome_2022: Signaling By MST1 R-HSA-8852405
Reactome_2022	ESR-mediated Signaling R-HSA-8939211	9/188	0.00219247	0.0306408	0	0	3.37286	20.6511	JUN;HSP90AA1;HSP90AB1;MMP7;GNG5;CAV2;PMEPA1;FOSB;FOS	Reactome_2022: ESR-mediated Signaling R-HSA-8939211
Reactome_2022	Metabolism Of Steroids R-HSA-8957322	8/153	0.00221327	0.0306408	0	0	3.69485	22.5877	ABCC3;AKR1C1;ALB;HSD17B2;AKR1C3;TSPO;HSD17B11;GC	Reactome_2022: Metabolism Of Steroids R-HSA-8957322
Reactome_2022	Cell-Cell Communication R-HSA-1500931	7/120	0.00223875	0.0306408	0	0	4.14114	25.2686	CLDN10;CLDN4;CLDN3;CLDN9;CLDN7;CD47;CLDN1	Reactome_2022: Cell-Cell Communication R-HSA-1500931
Reactome_2022	Signaling By MET R-HSA-6806834	5/63	0.00253716	0.0342143	0	0	5.73992	34.3058	RAB4A;SPINT1;SPINT2;RPS27A;ARF6	Reactome_2022: Signaling By MET R-HSA-6806834
Reactome_2022	Semaphorin Interactions R-HSA-373755	5/64	0.002719	0.0361352	0	0	5.64234	33.3321	HSP90AA1;HSP90AB1;SEMA6A;RHOB;MYL12B	Reactome_2022: Semaphorin Interactions R-HSA-373755
[truncated: 20 more rows]

## Sheet: S9_GSEA Hep_Assembloids
Supplementary Dataset 3_S9: GSEA for Hepatocyte cells in assembloids. KEGG and REACTOME pathways. Related to Fig. 4 and Extended Data Fig. 8. Filtered for Adjusted P-value < 0.05.
[truncated: 181 more rows]

[truncated: 3 more sheets: S10_GSEA Hep_Tissue, S11_GSEA MSC_Assembloid, S12_GSEA MSC_Tissue]
