# Supplementary material for: Human assembloids recapitulate periportal liver tissue in vitro
Source: Research Square preprint supplement (doi:10.21203/rs.3.rs-5314788/v1), 2025-09-17
Supplement: Supplementary file 8 [file bff5994369777aa96f6c3d46.xlsx]

## Sheet: S1_Isolation method
Supplmentary Table 1_S1: Isolation methods tested
												Summary of the results
	Identifier	Gender	Age	Diagnosis *	Cold Perfusion	Isolation method	Viability***	Hepatocyte-Organoid formation**	Passages >3			Tissue Dissociation
	DSD21	F	45	Focal nodular hyperplasia	No	Tissue Dissociation	0.48	No	n/a			Male / Female	Age (median)	total n tested	Organoid formation
	DSD22	F	59	polycystic liver	No	Tissue Dissociation	0.45	No	n/a			5M 3F	45-82 (66)	8	0/8 (0%)
	DSD25	M	50	Cholangiocarcinoma	No	Tissue Dissociation	0.3	No	n/a
	HCC46_Adj	M	61	HCC_adjacent tissue	No	Tissue Dissociation	0.43	No	n/a			Perfusion (with <50% viability) all conditions
	HCC47_Adj	M	82	HCC_adjacent tissue	No	Tissue Dissociation	0.23	No	n/a			Male / Female	Age (median)	total n tested	Organoid formation
	HCC48_Adj	F	69	HCC_adjacent tissue	No	Tissue Dissociation	0.45	No	n/a			8M 6F	45-74 (64.5)	14	1/14 (7.1%)
	HCC51_Adj	M	61	HCC_adjacent tissue	No	Tissue Dissociation	0.38	No	n/a
	HCC54_Adj	M	68	HCC_adjacent tissue	No	Tissue Dissociation	0.47	No	n/a
												Perfusion (with >50% viability)
												Male / Female	Age (median)	total n tested	Organoid formation
	DSD13	M	67	Rectum carcinoma liver meta	No	Perfusion	0.2	No	n/a			6M 5F	45-82 (63)	11	11/11 (100%)
	DSD14	M	58	Rectum carcinoma liver meta	No	Perfusion	0.15	No	n/a
	DSD15	F	53	CRC liver meta	No	Perfusion	0.45	No	n/a
	DSD16	M	73	CRC liver meta	No	Perfusion	0.4	No	n/a
	DSD17	F	60	Klatskin	No	Perfusion	0.35	No	n/a
	DSD18	F	72	Rectum carcinoma liver meta	No	Perfusion	0.3	No	n/a
	DSD19	M	60	Stomac carcinoma liver meta	No	Perfusion	0.3	No	n/a
	DSD27	M	62	Colorectal live meta	No	Perfusion	0.45	Yes	n/a
	DSD29	F	45	Sigma carcinoma liver met	No	Perfusion	0.32	No	n/a
	DSD33	F	66	Rectum carcinoma liver meta	No	Perfusion	0.34	No	n/a
	HCC45_Adj	F	74	HCC_adjacent tissue	No	Perfusion	0.45	No	n/a
	HCC52_Adj	M	68	HCC_adjacent tissue	No	Perfusion	0.35	No	n/a
	HCC59_Adj	M	63	HCC_adjacent tissue	No	Perfusion	0.32	No	n/a
	HCC62_Adj	M	74	HCC_adjacent tissue	No	Perfusion	0.3	No	n/a
	PHH1	M	69	CCC_adjacent tissue	Yes	Perfusion	0.8	Yes	NO
	PHH2	M	49	Caroli Syndrom	Yes	Perfusion	0.8	Yes	NO
	PHH3	M	70	HCC_adjacent tissue	Yes	Perfusion	0.7	Yes	NO
	DSD21(PHH4)	F	45	Focal nodular hyperplasia	Yes	Perfusion	0.9	Yes	NO
	DSD22(PHH5)	F	59	polycystic liver	Yes	Perfusion	0.8	Yes	NO
	PHH6	M	45	Colorectal live meta	Yes	Perfusion	0.75	Yes	NO
	PHH7	M	56	Colorectal live meta	Yes	Perfusion	0.8	Yes	NO
	PHH8	F	82	HCC_adjacent tissue	Yes	Perfusion	0.7	Yes	NO
	PHH9	M	74	Focal nodular hyperplasia	Yes	Perfusion	0.7	Yes	NO
	PHH10	F	63	HCC_adjacent tissue	Yes	Perfusion	0.7	Yes	NO
	PHH11	F	64	Colorectal live meta	Yes	Perfusion	0.85	Yes	NO
	*In all instances the healthy adjacent part of the tissue was collected and used for hepatocyte isolation and organoid generation.
	** Organoid formation refers to Hepatocyte-like organoids. Note that for all of these, h-CholOrg were formed when using our standard h-CholOrg medium as published in Huch et al., 2015.
	*** Hepatocyte organoids were generated in MM only when liver was perfused and viability was >50%. If any organoids grew in lower viability or when not perfused, these structures were h-CholOrg.
