# Supplementary material for: Human assembloids recapitulate periportal liver tissue in vitro
Source: Research Square preprint supplement (doi:10.21203/rs.3.rs-5314788/v1), 2025-09-17
Supplement: Supplementary file 9 [file cf4e0aaeda023dbcae84d1b9.xlsx]

## Sheet: Supplementary Table Info
Supplementary Dataset 4: scRNAseq analysis fibrosis
Supplementary Dataset 4_S1: GSEA enriched in Cholangiocyte cells from fibrotic compared to healthy conditions. KEGG pathways. Related to Fig.5 and Extended Data Fig.10. Filtered for p.adjust < 0.05.
Supplementary Dataset 4_S2: GSEA enriched in Cholangiocyte cells from fibrotic compared to healthy conditions. GO-terms pathways. Related to Fig.5 and Extended Data Fig.10. Filtered for p.adjust < 0.05.
Supplementary Dataset 4_S3: GSEA enriched in Cholangiocyte cells from fibrotic compared to healthy conditions. REACTOME pathways. Related to Fig.5 and Extended Data Fig.10. Filtered for p.adjust < 0.05.
Supplementary Dataset 4_S4: GSEA enriched in Hepatocyte cells from fibrotic compared to healthy conditions. KEGG pathways. Related to Fig.5 and Extended Data Fig.10. Filtered for p.adjust < 0.05.
Supplementary Dataset 4_S5: GSEA enriched in Hepatocyte cells from fibrotic compared to healthy conditions. GO-terms pathways. Related to Fig.5 and Extended Data Fig.10. Filtered for p.adjust < 0.05.
Supplementary Dataset 4_S6: GSEA enriched in Hepatocyte cells from fibrotic compared to healthy conditions. REACTOME pathways. Related to Fig.5 and Extended Data Fig.10. Filtered for p.adjust < 0.05.
Supplementary Dataset 4_S7: GSEA enriched in Mesenchyme cells from fibrotic compared to healthy conditions. KEGG pathways. Related to Fig.5 and Extended Data Fig.10. Filtered for p.adjust < 0.05.
Supplementary Dataset 4_S8: GSEA enriched in Mesenchyme cells from fibrotic compared to healthy conditions. GO-terms pathways. Related to Fig.5 and Extended Data Fig.10. Filtered for p.adjust < 0.05.
Supplementary Dataset 4_S9: GSEA enriched in Mesenchyme cells from fibrotic compared to healthy conditions. REACTOME pathways. Related to Fig.5and Extended Data Fig.10. Filtered for p.adjust < 0.05.

## Sheet: S1_GSEA Chol_fibrotic_KEGG
Supplementary Dataset 4_S1: GSEA enriched in Cholangiocyte cells from fibrotic compared to healthy conditions. KEGG pathways. Related to Fig.5 and Extended Data Fig.10. Filtered for p.adjust < 0.05.
ID	Description	setSize	enrichmentScore	NES	pvalue	p.adjust	qvalue	rank	leading_edge	core_enrichment
hsa04820	Cytoskeleton in muscle cells	159	0.615277	2.24764	1e-10	3.46e-08	2.75789e-08	2136	tags=43%, list=14%, signal=37%	COL1A2/DCN/COL3A1/THBS2/MYL9/COL6A3/TPM2/BGN/COL5A2/COL6A2/FBN1/ITGA4/COL1A1/COL5A1/SGCA/LAMA2/FN1/FBLN2/ITGA5/FMNL1/ITGB3/DIAPH3/ANKRD1/DAAM2/TNNT1/FLNC/MYL11/COL4A1/ITGA11/ITGA10/COL4A2/NID2/TNNI2/ITGB6/TMOD4/FBLN1/SUN2/THBS1/ITGB1/COL5A3/COL6A1/PDLIM4/SPTBN5/ELN/COL27A1/COL4A3/TPM4/TMOD2/PDLIM3/TPM1/ZYX/FMNL3/VCL/NID1/ACTB/COL4A4/SGCE/ITGAV/LMNB2/AGRN/PLEC/SDC3/ENO3/SYNE3/COL4A5/SPTBN2/SYNE1/A…
hsa05217	Basal cell carcinoma	50	0.657533	2.02502	6.22238e-05	0.00113313	0.000903194	2284	tags=40%, list=15%, signal=34%	GLI3/GLI1/LEF1/WNT5A/HHIP/FZD2/FZD7/KIF7/WNT3/FZD8/SMO/WNT5B/DVL1/CTNNB1/WNT7A/WNT11/GLI2/FZD6/GADD45B/CDKN1A
hsa04512	ECM-receptor interaction	60	0.6262	1.98897	3.0018e-05	0.000610954	0.000486979	1152	tags=38%, list=8%, signal=36%	COL1A2/THBS2/COL6A3/COL6A2/ITGA4/COL1A1/LAMA2/FN1/CD36/LAMA4/ITGA5/ITGB3/COL4A1/ITGA11/ITGA10/COL4A2/HMMR/TNC/ITGB6/THBS1/ITGB1/COL6A1/COL4A3
hsa04933	AGE-RAGE signaling pathway in diabetic complications	89	0.580958	1.96545	1.62984e-05	0.000365165	0.000291066	1757	tags=29%, list=12%, signal=26%	COL1A2/COL3A1/MMP2/COL1A1/FN1/SERPINE1/AGER/CCL2/ICAM1/NOX4/COL4A1/COL4A2/EGR1/TGFBR1/IL1B/MAPK11/PLCG1/PIK3CD/COL4A3/NFATC1/AKT3/PLCB4/F3/TGFB3/TGFB2/COL4A4
hsa05205	Proteoglycans in cancer	168	0.526655	1.93859	1.95216e-07	9.64923e-06	7.6912e-06	1808	tags=24%, list=12%, signal=21%	COL1A2/DCN/TWIST1/VAV1/MMP2/LUM/COL1A1/TIMP3/FN1/WNT5A/FZD2/TWIST2/ITGA5/ITGB3/FZD7/WNT3/FLNA/FZD8/SMO/WNT5B/THBS1/ITGB1/MAPK11/PLCG1/PIK3CD/MRAS/CTNNB1/PLAU/WNT7A/MSN/AKT3/CBL/WNT11/ITPR3/IHH/HIF1A/ACTB/TGFB2/GAB1/ITGAV
hsa04510	Focal adhesion	164	0.528775	1.93659	6.02395e-07	2.60536e-05	2.07668e-05	1635	tags=24%, list=11%, signal=21%	COL1A2/PDGFRB/THBS2/MYL9/COL6A3/COL6A2/ITGA4/VAV1/COL1A1/LAMA2/PDGFRA/FN1/LAMA4/SHC3/ITGA5/ITGB3/MYL11/COL4A1/ITGA11/ITGA10/PAK6/COL4A2/TNC/FLNA/ITGB6/THBS1/ITGB1/PDGFB/PIK3CD/COL6A1/CTNNB1/PDGFC/COL4A3/AKT3/ZYX/PIP5K1A/VCL/ACTB/SHC1
hsa04926	Relaxin signaling pathway	102	0.563591	1.92281	5.86944e-06	0.000184621	0.000147157	1335	tags=22%, list=9%, signal=20%	COL1A2/COL3A1/MMP2/MMP13/COL1A1/ADCY1/GNG11/SHC3/ADCY4/COL4A1/ADCY3/COL4A2/GNB4/TGFBR1/ADCY7/MAPK11/PIK3CD/ADCY5/GNA15/COL4A3/AKT3/PLCB4
hsa05144	Malaria	25	0.706022	1.86025	0.0015864	0.0152471	0.0121531	877	tags=36%, list=6%, signal=34%	GYPC/THBS2/IL10/CD36/CD40/CCL2/ICAM1/IL1B/THBS1
hsa05206	MicroRNAs in cancer	145	0.488194	1.75851	0.000125486	0.00217091	0.00173039	2570	tags=28%, list=17%, signal=24%	PDGFRB/ZEB2/PDGFRA/TIMP3/ITGA5/ITGB3/KIF23/TP63/ZEB1/WNT3/TNC/DDIT4/RECK/BMF/SOCS1/THBS1/PDGFB/PLCG1/PIK3CD/PLAU/EFNA5/TPM1/E2F1/NOTCH4/SHC1/TGFB2/CDKN2A/NOTCH2/NOTCH3/SLC7A1/ABL1/RASSF1/GLS/FOXP1/VIM/CDKN1A/CCNE1/FSCN1/PDGFA/HMGA2/MCL1
hsa04540	Gap junction	68	0.524064	1.70064	0.00310448	0.0246383	0.0196387	1746	tags=25%, list=12%, signal=22%	PDGFRB/ADCY1/PDGFRA/ADCY4/ADCY3/DRD1/ADCY7/PDGFB/GJA1/ADCY5/PDGFC/TUBB6/PLCB4/ITPR3/GUCY1A2/LPAR1/TUBB3
hsa04916	Melanogenesis	72	0.518749	1.69289	0.00267616	0.0226711	0.0180707	1606	tags=25%, list=11%, signal=22%	ADCY1/LEF1/WNT5A/FZD2/ADCY4/FZD7/ADCY3/WNT3/FZD8/WNT5B/ADCY7/DVL1/ADCY5/CTNNB1/WNT7A/PLCB4/WNT11/MC1R
hsa05165	Human papillomavirus infection	272	0.434018	1.68999	1.11238e-05	0.000296064	0.000235986	2577	tags=24%, list=17%, signal=20%	COL1A2/PDGFRB/THBS2/COL6A3/COL6A2/ITGA4/COL1A1/HES7/LAMA2/FN1/WNT5A/LAMA4/FZD2/CCNA1/ITGA5/ITGB3/FZD7/COL4A1/ITGA11/ITGA10/COL4A2/WNT3/TNC/ITGB6/FZD8/WNT5B/THBS1/ITGB1/PIK3CD/COL6A1/DVL1/CTNNB1/COL4A3/WNT7A/AKT3/MAML2/WNT11/E2F1/NOTCH4/IRF1/COL4A4/SCRIB/ITGAV/NOTCH2/NOTCH3/HLA-G/FZD6/PPP2R2B/TBPL1/COL4A5/JAG1/HES2/RBPJ/LFNG/DLG2/CDKN1A/PARD6G/TYK2/CCNE1/LAMC2/ITGB5/TUBG2/STAT2/CREB3L2/ITGA3
hsa04670	Leukocyte transendothelial migration	83	0.505318	1.67685	0.00125491	0.0135687	0.0108153	1280	tags=20%, list=9%, signal=19%	THY1/MYL9/ITGA4/VAV1/MMP2/CLDN11/ICAM1/MYL11/CXCL12/ITGB1/MAPK11/PLCG1/PIK3CD/CTNNB1/CLDN6/CLDN14/MSN
hsa05412	Arrhythmogenic right ventricular cardiomyopathy	57	0.53405	1.67352	0.00401552	0.0295611	0.0235625	1808	tags=33%, list=12%, signal=29%	ITGA4/SGCA/LAMA2/LEF1/ITGA5/ITGB3/CACNB2/CDH2/ITGA11/ITGA10/CACNB1/ITGB6/ITGB1/GJA1/CTNNB1/CACNB4/ACTB/SGCE/ITGAV
hsa04390	Hippo signaling pathway	131	0.466407	1.65201	0.000834418	0.0104441	0.0083248	2334	tags=32%, list=16%, signal=27%	BMPR1B/LEF1/WNT5A/FGF1/FZD2/SERPINE1/FZD7/SNAI2/WNT3/CCN2/FZD8/BIRC5/TGFBR1/WNT5B/DVL1/CTNNB1/SOX2/FRMD6/DLG4/WNT7A/WTIP/AJUBA/WNT11/TGFB3/ACTB/TGFB2/BMP8B/SCRIB/SMAD7/GLI2/FZD6/AMH/NKD1/PPP2R2B/TEAD2/RASSF1/DLG2/PARD6G/TEAD3/FBXW11/MOB1B/YWHAH
hsa05146	Amoebiasis	76	0.501201	1.63223	0.00648943	0.0415818	0.033144	1757	tags=28%, list=12%, signal=24%	COL1A2/COL3A1/COL1A1/ADCY1/LAMA2/IL10/FN1/LAMA4/COL4A1/COL4A2/IL1B/PIK3CD/GNA15/COL4A3/PLCB4/CXCL1/VCL/TGFB3/HSPB1/TGFB2/COL4A4
hsa04723	Retrograde endocannabinoid signaling	89	0.474299	1.60461	0.00380459	0.0286172	0.0228101	2844	tags=31%, list=19%, signal=26%	NDUFA4L2/ADCY1/GNG11/NDUFC2-KCTD14/ADCY4/ADCY3/GNB4/NDUFB1/ADCY7/MAPK11/NDUFA1/ADCY5/NDUFA3/PLCB4/ITPR3/NDUFC1/NDUFB2/GABRE/NDUFB4/NDUFS6/NDUFA6/NDUFA2/NDUFS5/GNB5/NDUFB3/NDUFA13/MAPK12/NDUFA11
hsa05415	Diabetic cardiomyopathy	165	0.422454	1.54853	0.00153833	0.0152471	0.0121531	2395	tags=25%, list=16%, signal=21%	COL1A2/COL3A1/NDUFA4L2/COX7A1/MMP2/COL1A1/CD36/NDUFC2-KCTD14/AGER/CPT1B/COX6B2/ATP5F1E/TGFBR1/NDUFB1/MAPK11/PIK3CD/NDUFA1/GYS1/UQCR11/NDUFA3/AKT3/UQCRQ/PLCB4/NDUFC1/NDUFB2/TGFB3/TGFB2/SLC2A1/COX7C/COX7A2/NDUFB4/NCF2/PDK3/NDUFS6/NDUFA6/COX7B/NDUFA2/UQCR10/UQCRB/NDUFS5/COX6B1
hsa04151	PI3K-Akt signaling pathway	250	0.376442	1.45291	0.00204069	0.0186256	0.0148461	1152	tags=14%, list=8%, signal=13%	COL1A2/PDGFRB/THBS2/COL6A3/COL6A2/ITGA4/COL1A1/LAMA2/GNG11/PDGFRA/FN1/FGF1/LAMA4/ITGA5/ITGB3/NTF4/NRTN/COL4A1/ITGA11/ITGA10/COL4A2/GNB4/TNC/OSMR/DDIT4/ITGB6/THBS1/ITGB1/PDGFB/PIK3CD/COL6A1/GYS1/PDGFC/EFNA5/COL4A3
hsa04714	Thermogenesis	198	0.384384	1.44337	0.00578932	0.0385213	0.0307045	2844	tags=28%, list=19%, signal=23%	NDUFA4L2/COX7A1/ADCY1/NDUFC2-KCTD14/ADCY4/CPT1B/ADCY3/COX6B2/CPT1C/ATP5F1E/ATP5ME/NDUFB1/ADCY7/COX17/MAPK11/NDUFA1/ADCY5/COX16/UQCR11/RPS6KA2/NDUFA3/COX20/ATP5MF/UQCRQ/NDUFC1/NDUFB2/ACSL4/ACTB/BMP8B/COX7C/COX7A2/NDUFB4/ZNF516/NDUFAF2/NDUFS6/NDUFA6/COX7B/NDUFA2/UQCR10/COX14/UQCRB/NDUFS5/COX6B1/SMARCD1/KDM1A/SMARCD3/ACSL1/ATP5MG/CREB3L2/NDUFB3/NDUFA13/COX6C/MAPK12/ATP5MGL/ACTG1/NDUFA11
hsa05200	Pathways in cancer	407	0.332415	1.33201	0.0044215	0.0312212	0.0248858	2531	tags=23%, list=17%, signal=20%	PDGFRB/EDNRA/MMP2/ADCY1/GLI3/LAMA2/GLI1/LEF1/GNG11/PDGFRA/FN1/WNT5A/HHIP/FGF1/LAMA4/FZD2/CCNA1/GSTM1/BIRC7/ADCY4/FZD7/COL4A1/CXCL12/ADCY3/KIF7/PTGER1/COL4A2/NKX3-1/GNB4/WNT3/FZD8/BIRC5/TGFBR1/SMO/WNT5B/ADCY7/ITGB1/EGLN3/PDGFB/PLCG1/PIK3CD/DVL1/ADCY5/CTNNB1/DLL4/CDKN2B/COL4A3/WNT7A/ELOB/AKT3/PLCB4/CBL/GSTT2B/WNT11/E2F1/TGFB3/NOTCH4/HIF1A/LPAR1/RARA/TGFB2/SLC2A1/COL4A4/CDKN2A/RASGRP1/ITGAV/DAPK3/NO…
hsa05207	Chemical carcinogenesis - receptor activation	149	-0.44071	-1.57362	0.00224595	0.0199256	0.0158823	2390	tags=28%, list=16%, signal=24%	CREB3L4/UGT1A6/PRKCA/PIK3R3/BCL2/MGST2/CREB5/GSTA4/TNFSF11/JAK2/HSP90AA1/GSTO1/MYC/ESR2/FOS/PIK3R1/FGF9/FGF18/PAQR8/UGT2B11/KLF5/ARRB1/MGST1/CACNA1D/ADRB2/CHRNA7/CYP1A1/UGT1A4/UGT2A3/UGT2B17/AR/EPHX2/UGT2B28/ARRB2/CDC6/DLL3/CREB3L3/UGT2B15/GSTA1/UGT2B10/GSTA2/CYP3A4
hsa04080	Neuroactive ligand-receptor interaction	114	-0.468398	-1.61753	0.00204559	0.0186256	0.0148461	1324	tags=33%, list=9%, signal=31%	OXTR/HCRT/SSTR5/EDN3/BDKRB1/AGTR1/ADRA1D/LYPD6B/ADRB2/KISS1/CHRNA7/BDKRB2/P2RY1/CCK/HTR2B/GABRP/LYPD6/VIPR1/INSL3/PLG/SSTR1/PTH2R/FPR1/NPW/PTAFR/CHRM3/PMCH/AGT/HTR1D/GRIN2A/GRIN2B/PRSS3/GALR2/GHR/PRLR/GAL/ADRA2A/KNG1
hsa01200	Carbon metabolism	101	-0.486577	-1.65434	0.00140609	0.0147426	0.011751	3479	tags=43%, list=23%, signal=33%	IDH3A/PSPH/PCCB/MDH1/AMT/GLUD1/ACO2/MDH2/TKT/PDHA1/PFKM/PCCA/SHMT2/IDH3G/GPI/ACOX1/PSAT1/SUCLG1/ECHS1/SDHD/GPT2/PFKL/ALDH6A1/TKFC/GLYCTK/SUCLG2/RGN/HIBCH/ACADS/ACSS1/SHMT1/MCEE/CAT/IDNK/GLUD2/GLDC/PKLR/ALDOB/HAO1/FBP1/AGXT2/GPT/CPS1
hsa00040	Pentose and glucuronate interconversions	25	-0.64552	-1.66913	0.00707921	0.0437394	0.0348638	2665	tags=60%, list=18%, signal=49%	UGT2B7/XYLB/AKR1A1/UGT1A6/DCXR/CRYL1/UGT2B11/DHDH/UGT1A4/UGT2A3/UGT2B17/UGT2B28/UGT2B15/UGT2B10/AKR1B10
hsa00630	Glyoxylate and dicarboxylate metabolism	29	-0.623372	-1.67947	0.00689736	0.0433907	0.0345858	3414	tags=62%, list=23%, signal=48%	PCCB/MDH1/AMT/ACO2/MDH2/PCCA/SHMT2/GRHPR/GLUL/GLYCTK/ACSS1/SHMT1/MCEE/CAT/GLDC/HAO1/HOGA1/AGXT2
hsa04610	Complement and coagulation cascades	60	-0.539484	-1.68128	0.00325275	0.02501	0.019935	1415	tags=38%, list=10%, signal=35%	F8/TFPI/C4BPB/A2M/BDKRB1/BDKRB2/SERPINB2/THBD/VTN/C4BPA/C8G/PLG/SERPIND1/CFD/F11/C8A/CLU/F10/F7/SERPINC1/C6/KNG1/MASP1
hsa04975	Fat digestion and absorption	29	-0.626248	-1.68722	0.00648964	0.0415818	0.033144	872	tags=38%, list=6%, signal=36%	ABCG8/PLA2G10/MOGAT3/SLC27A1/APOB/FABP1/PLA2G12B/DGAT2/MTTP/APOA1/PLA2G2A
hsa00590	Arachidonic acid metabolism	41	-0.583164	-1.7031	0.00458631	0.0317372	0.0252971	1449	tags=46%, list=10%, signal=42%	AKR1C3/ALOX5/PRXL2B/TBXAS1/PLA2G6/PLA2G4A/PLA2G10/EPHX2/CYP4F3/CYP2C9/PLAAT3/CYP4F2/CYP2C19/PLAAT2/CYP2C8/PLA2G12B/CYP2E1/PLA2G4C/PLA2G2A
hsa00910	Nitrogen metabolism	11	-0.809755	-1.70876	0.00268646	0.0226711	0.0180707	1579	tags=73%, list=11%, signal=65%	CA13/CA3/CA9/CA5B/GLUD2/CA14/CPS1/CA2
hsa01240	Biosynthesis of cofactors	136	-0.488423	-1.72447	0.000134814	0.00222122	0.00177049	2994	tags=38%, list=20%, signal=30%	SHMT2/GUSB/COX15/PTS/COQ3/UGT2B7/PSAT1/AK6/AKR1A1/OXSM/NME1/UGT1A6/KYNU/GCLC/COQ2/NME3/PMM1/AK2/PANK1/LIAS/MPI/NAPRT/ALAS1/RGN/AK9/DHFR/AK4/GCH1/SHMT1/MOCS1/UGT2B11/ALDH3A2/ALDH2/ALDH1B1/CMPK2/NMNAT3/UGT1A4/UGT2A3/UGT2B17/BCO1/NQO1/UGT2B28/SDR16C5/MAT1A/HSD17B6/RDH12/HAAO/UGT2B15/TDO2/UGT2B10/HPD
hsa04964	Proximal tubule bicarbonate reclamation	16	-0.744256	-1.75504	0.00509235	0.0345481	0.0275376	2299	tags=69%, list=15%, signal=58%	PCK2/SLC4A4/ATP1A1/ATP1B1/GLS2/FXYD2/AQP1/GLUD2/SLC9A3/PCK1/CA2
hsa04950	Maturity onset diabetes of the young	16	-0.74855	-1.76517	0.00430892	0.0310601	0.0247574	1155	tags=44%, list=8%, signal=40%	PDX1/HNF4G/BHLHA15/HHEX/SLC2A2/PKLR/ONECUT1
hsa00565	Ether lipid metabolism	35	-0.623509	-1.76756	0.00275202	0.0226714	0.0180709	978	tags=31%, list=7%, signal=29%	PLA2G6/CHPT1/PLA2G4A/PLA2G10/PLD1/PLAAT3/PLA2G7/PLAAT2/PLA2G12B/PLA2G4C/PLA2G2A
hsa00280	Valine, leucine and isoleucine degradation	45	-0.593652	-1.77373	0.00313319	0.0246383	0.0196387	2360	tags=51%, list=16%, signal=43%	HADHA/PCCB/HIBADH/ALDH9A1/PCCA/ECHS1/AUH/BCKDHB/MCCC2/ALDH6A1/ABAT/HIBCH/ACADS/EHHADH/HADH/ACADSB/ALDH3A2/ALDH2/MCEE/ALDH1B1/AOX1/AGXT2/HMGCS2
hsa01230	Biosynthesis of amino acids	65	-0.567867	-1.79602	0.000920186	0.0106128	0.00845926	1310	tags=20%, list=9%, signal=18%	SHMT1/CBS/ABHD14A-ACY1/CTH/MAT1A/PKLR/ALDOB/ASS1/GPT/ARG1/CPS1/PAH/OTC
hsa00650	Butanoate metabolism	20	-0.724632	-1.8123	0.00113745	0.0126955	0.0101193	2360	tags=60%, list=16%, signal=51%	ECHS1/GAD1/ABAT/ACADS/EHHADH/ALDH5A1/HADH/BDH1/ACSM2B/ACSM3/HMGCS2/ACSM2A
hsa04977	Vitamin digestion and absorption	21	-0.722754	-1.81301	0.00157739	0.0152471	0.0121531	796	tags=43%, list=5%, signal=41%	SLC19A2/TCN2/LRAT/APOB/AMN/SLC19A3/SLC23A1/APOA1/RBP2
hsa00260	Glycine, serine and threonine metabolism	28	-0.679482	-1.81838	0.00084519	0.0104441	0.0083248	2054	tags=68%, list=14%, signal=59%	PSPH/AMT/SHMT2/GRHPR/PSAT1/MAOB/ALAS1/GLYCTK/CHDH/SHMT1/GAMT/CBS/CTH/GLDC/GCAT/MAOA/GATM/PIPOX/AGXT2
hsa04976	Bile secretion	62	-0.583764	-1.8221	0.000378953	0.00524472	0.00418046	1202	tags=34%, list=8%, signal=31%	UGT2B11/FXYD2/UGT1A4/ABCG8/UGT2A3/AQP1/UGT2B17/NR1H4/SLCO1B1/ABCC2/UGT2B28/SLC22A7/CFTR/UGT2B15/NR0B2/UGT2B10/SLC9A3/SLC5A1/CA2/SULT2A1/CYP3A4
hsa00250	Alanine, aspartate and glutamate metabolism	30	-0.672293	-1.83077	0.000901642	0.0106128	0.00845926	2485	tags=57%, list=17%, signal=47%	PPAT/NIT2/GLUL/GPT2/GAD1/ABAT/DDO/ALDH5A1/ASPA/GLS2/RIMKLA/GLUD2/ASRGL1/ASS1/AGXT2/GPT/CPS1
hsa00360	Phenylalanine metabolism	12	-0.843183	-1.83867	0.000288091	0.0043339	0.00345446	892	tags=50%, list=6%, signal=47%	ALDH3B1/MAOA/ALDH3A1/DDC/PAH/HPD
hsa00220	Arginine biosynthesis	19	-0.755638	-1.85919	0.000678176	0.00902496	0.00719361	1284	tags=42%, list=9%, signal=39%	GLS2/ABHD14A-ACY1/GLUD2/ASS1/GPT/ARG1/CPS1/OTC
hsa00340	Histidine metabolism	19	-0.771593	-1.89845	0.00031593	0.00455466	0.00363043	1384	tags=58%, list=9%, signal=53%	MAOB/ASPA/ALDH3A2/ALDH2/ALDH1B1/CARNS1/ALDH3B1/MAOA/AOC1/ALDH3A1/FTCD
hsa00983	Drug metabolism - other enzymes	61	-0.616702	-1.9254	5.82443e-05	0.00111958	0.000892398	2508	tags=46%, list=17%, signal=38%	TPMT/UCKL1/ITPA/NME1/UGT1A6/NME3/MGST2/GSTA4/TK1/GSTO1/NAT1/GSTP1/UGT2B11/MGST1/UGT1A4/UGT2A3/UGT2B17/UGT2B28/NAT2/CES2/UGT2B15/DPYS/GSTA1/UGT2B10/CYP2E1/CES1/GSTA2/CYP3A4
hsa00620	Pyruvate metabolism	41	-0.664256	-1.93993	0.000154554	0.00243072	0.00193748	1339	tags=29%, list=9%, signal=27%	ACSS1/ALDH3A2/ALDH2/ALDH1B1/ADH1C/PKLR/ADH4/ADH6/LDHD/ADH1A/PCK1/ADH1B
hsa00591	Linoleic acid metabolism	17	-0.843088	-2.01184	1.68863e-05	0.000365165	0.000291066	978	tags=76%, list=7%, signal=72%	PLA2G6/PLA2G4A/PLA2G10/CYP2C9/PLAAT3/CYP2C19/PLAAT2/CYP2C8/PLA2G12B/CYP2E1/PLA2G4C/PLA2G2A/CYP3A4
hsa04614	Renin-angiotensin system	14	-0.888486	-2.02811	4.04456e-06	0.000139942	0.000111545	1112	tags=50%, list=7%, signal=46%	AGTR1/ACE/ANPEP/MME/AGT/ACE2/KLK1
hsa00010	Glycolysis / Gluconeogenesis	54	-0.664635	-2.05111	8.14463e-06	0.000234837	0.000187184	1339	tags=31%, list=9%, signal=29%	ACSS1/ALDH3A2/ALDH2/ALDH1B1/ALDH3B1/G6PC1/GALM/ADH1C/PKLR/ADH4/ALDH3A1/ALDOB/FBP1/ADH6/ADH1A/PCK1/ADH1B
hsa00330	Arginine and proline metabolism	42	-0.702518	-2.06628	1.20036e-05	0.000296661	0.000236463	2054	tags=45%, list=14%, signal=39%	MAOB/SAT2/OAT/SAT1/GAMT/ALDH3A2/ALDH2/ALDH1B1/AGMAT/CARNS1/CKMT2/MAOA/AOC1/CKMT1A/GATM/HOGA1/PRODH2/CKMT1B/ARG1
hsa00350	Tyrosine metabolism	24	-0.80938	-2.07126	3.49517e-06	0.00013437	0.000107103	892	tags=46%, list=6%, signal=43%	ALDH3B1/ADH1C/AOX1/MAOA/ADH4/ALDH3A1/ADH6/DDC/ADH1A/HPD/ADH1B
hsa05204	Chemical carcinogenesis - DNA adducts	46	-0.745384	-2.24656	1.15891e-07	6.68308e-06	5.32694e-06	1202	tags=65%, list=8%, signal=60%	UGT1A6/CBR1/MGST2/GSTA4/GSTK1/GSTO1/NAT1/GSTP1/UGT2B11/MGST1/CYP1A1/UGT1A4/UGT2A3/UGT2B17/CYP3A5/CYP2C18/UGT2B28/CYP2C9/NAT2/HSD11B1/CYP2C19/UGT2B15/CYP2C8/GSTA1/UGT2B10/CYP2E1/CYP3A7/SULT2A1/GSTA2/CYP3A4
hsa00140	Steroid hormone biosynthesis	41	-0.769476	-2.24722	4.6213e-08	3.19794e-06	2.54901e-06	1555	tags=59%, list=10%, signal=53%	HSD17B11/SRD5A3/CYP7B1/UGT2B11/CYP1A1/SULT1E1/DHRS11/SULT2B1/UGT1A4/UGT2A3/UGT2B17/HSD17B2/CYP3A5/UGT2B28/HSD17B6/HSD11B1/UGT2B15/UGT2B10/CYP2E1/CYP3A7/AKR1D1/AKR1C4/HSD11B2/CYP3A4
hsa00982	Drug metabolism - cytochrome P450	49	-0.768631	-2.3225	1.63971e-09	1.41835e-07	1.13053e-07	1202	tags=69%, list=8%, signal=64%	MGST2/GSTA4/MAOB/GSTK1/GSTO1/FMO4/GSTP1/UGT2B11/FMO5/MGST1/ALDH3B1/UGT1A4/UGT2A3/UGT2B17/CYP3A5/UGT2B28/CYP2C9/ADH1C/AOX1/MAOA/ADH4/ALDH3A1/CYP2C19/FMO3/UGT2B15/CYP2C8/ADH6/GSTA1/UGT2B10/CYP2E1/ADH1A/ADH1B/GSTA2/CYP3A4
hsa00980	Metabolism of xenobiotics by cytochrome P450	55	-0.759796	-2.35085	5.32997e-10	6.14724e-08	4.89984e-08	1202	tags=49%, list=8%, signal=45%	UGT2B11/MGST1/CYP2S1/DHDH/CYP1A1/ALDH3B1/UGT1A4/UGT2A3/UGT2B17/CYP3A5/UGT2B28/CYP2C9/ADH1C/ADH4/HSD11B1/ALDH3A1/AKR7A3/UGT2B15/ADH6/GSTA1/UGT2B10/CYP2E1/ADH1A/ADH1B/SULT2A1/GSTA2/CYP3A4
hsa00830	Retinol metabolism	48	-0.788142	-2.37265	3.67064e-10	6.14724e-08	4.89984e-08	1475	tags=62%, list=10%, signal=56%	ALDH1A2/DHRS9/UGT2B11/CYP2S1/CYP1A1/UGT1A4/UGT2A3/UGT2B17/LRAT/BCO1/CYP3A5/CYP2C18/UGT2B28/SDR16C5/CYP2C9/ADH1C/AOX1/ADH4/HSD17B6/RDH12/UGT2B15/CYP2C8/ADH6/UGT2B10/ALDH1A1/RDH16/CYP3A7/ADH1A/ADH1B/CYP3A4

## Sheet: S2_GSEA Chol_fibrotic_GO
Supplementary Dataset 4_S2: GSEA enriched in Cholangiocyte cells from fibrotic compared to healthy conditions. GO-terms pathways. Related to Fig.5 and Extended Data Fig.10. Filtered for p.adjust < 0.05.
ONTOLOGY	ID	Description	setSize	enrichmentScore	NES	pvalue	p.adjust	qvalue	rank	leading_edge	core_enrichment
MF	GO:0005201	extracellular matrix structural constituent	104	0.722272	2.46794	1e-10	4.23968e-08	3.72783e-08	1016	tags=52%, list=8%, signal=48%	MGP/POSTN/COL1A2/DCN/COL8A1/THBS2/AEBP1/SPARC/COL6A3/FBLN5/PXDN/EMILIN1/BGN/COL5A2/CTHRC1/COL6A2/FBN1/LUM/COL1A1/COL5A1/FMOD/EDIL3/LAMA2/CHI3L1/PCOLCE/LTBP2/FN1/FBLN2/LAMA4/EFEMP1/MATN3/EFEMP2/MFAP2/SRPX/ANOS1/IGFBP7/COL7A1/COL4A1/COL4A2/NID2/COL12A1/TNC/FBLN1/TGFBI/MFAP5/THBS1/LTBP4/COL5A3/COL6A1/LTBP1/ELN/SRPX2/COL27A1/COL4A3
BP	GO:0030199	collagen fibril organization	47	0.781451	2.36992	2.42475e-09	6.2873e-07	5.52825e-07	1469	tags=60%, list=11%, signal=53%	COL1A2/AEBP1/PXDN/EMILIN1/LOX/COL5A2/ADAMTS2/DDR2/LUM/COL1A1/COL5A1/FMOD/EFEMP2/SCX/ADAMTS7/LOXL2/COL12A1/LOXL1/FKBP10/TGFBR1/COL5A3/COLGALT1/COL27A1/FOXC1/SERPINH1/ADAMTS14/BMP1/TGFB2
MF	GO:0005518	collagen binding	54	0.760265	2.36674	3.57551e-09	8.94006e-07	7.86075e-07	867	tags=46%, list=6%, signal=43%	SPARCL1/AEBP1/SPARC/LOX/COL6A2/CCBE1/MMP13/DDR2/CTSK/LUM/PCOLCE/FN1/ANTXR1/ITGA11/ITGA10/MRC2/NID2/PCOLCE2/TGFBI/C1QTNF1/THBS1/ITGB1/PDGFB/COL5A3/COL6A1
CC	GO:0005581	collagen trimer	39	0.788738	2.32056	4.4539e-08	7.79543e-06	6.85431e-06	1016	tags=54%, list=8%, signal=50%	COL1A2/COL8A1/COL6A3/EMILIN1/LOX/COL5A2/CTHRC1/COL6A2/CCBE1/LUM/COL1A1/COL5A1/COL7A1/COL4A1/COL4A2/COL12A1/C1QTNF1/COL5A3/COL6A1/COL27A1/COL4A3
BP	GO:0045229	external encapsulating structure organization	219	0.608262	2.30579	1e-10	4.23968e-08	3.72783e-08	1469	tags=35%, list=11%, signal=32%	POSTN/COL1A2/SULF1/COL8A1/AEBP1/FBLN5/FAP/PXDN/EMILIN1/LOX/COL5A2/ENG/MMP2/LCP1/ADAMTS2/MMP13/DDR2/CTSK/LUM/COL1A1/COL5A1/FMOD/OLFML2B/CRISPLD2/LAMA2/PDGFRA/ADAMTS10/CCDC80/MATN3/EFEMP2/ITGB3/ANTXR1/SCX/ADAMTS7/LOXL2/MMP19/COL7A1/COL4A1/PTX3/MMP10/MMP3/COL4A2/OLFML2A/NID2/COL12A1/ADAMTS15/ADAMTS6/BCL3/LOXL1/RECK/FBLN1/TGFBI/FKBP10/TGFBR1/ITGB1/COL5A3/PHLDB1/ELN/COLGALT1/COL27A1/FOXC1/COL4A3/MMP14…
BP	GO:0030198	extracellular matrix organization	218	0.609221	2.3036	1e-10	4.23968e-08	3.72783e-08	1469	tags=35%, list=11%, signal=32%	POSTN/COL1A2/SULF1/COL8A1/AEBP1/FBLN5/FAP/PXDN/EMILIN1/LOX/COL5A2/ENG/MMP2/LCP1/ADAMTS2/MMP13/DDR2/CTSK/LUM/COL1A1/COL5A1/FMOD/OLFML2B/CRISPLD2/LAMA2/PDGFRA/ADAMTS10/CCDC80/MATN3/EFEMP2/ITGB3/ANTXR1/SCX/ADAMTS7/LOXL2/MMP19/COL7A1/COL4A1/PTX3/MMP10/MMP3/COL4A2/OLFML2A/NID2/COL12A1/ADAMTS15/ADAMTS6/BCL3/LOXL1/RECK/FBLN1/TGFBI/FKBP10/TGFBR1/ITGB1/COL5A3/PHLDB1/ELN/COLGALT1/COL27A1/FOXC1/COL4A3/MMP14…
BP	GO:0043062	extracellular structure organization	218	0.609221	2.3036	1e-10	4.23968e-08	3.72783e-08	1469	tags=35%, list=11%, signal=32%	POSTN/COL1A2/SULF1/COL8A1/AEBP1/FBLN5/FAP/PXDN/EMILIN1/LOX/COL5A2/ENG/MMP2/LCP1/ADAMTS2/MMP13/DDR2/CTSK/LUM/COL1A1/COL5A1/FMOD/OLFML2B/CRISPLD2/LAMA2/PDGFRA/ADAMTS10/CCDC80/MATN3/EFEMP2/ITGB3/ANTXR1/SCX/ADAMTS7/LOXL2/MMP19/COL7A1/COL4A1/PTX3/MMP10/MMP3/COL4A2/OLFML2A/NID2/COL12A1/ADAMTS15/ADAMTS6/BCL3/LOXL1/RECK/FBLN1/TGFBI/FKBP10/TGFBR1/ITGB1/COL5A3/PHLDB1/ELN/COLGALT1/COL27A1/FOXC1/COL4A3/MMP14…
MF	GO:0030020	extracellular matrix structural constituent conferring tensile strength	25	0.835018	2.21364	1.0509e-06	0.00012685	0.000111536	1245	tags=64%, list=9%, signal=58%	COL1A2/COL8A1/COL6A3/COL5A2/COL6A2/COL1A1/COL5A1/COL7A1/COL4A1/COL4A2/COL12A1/COL5A3/COL6A1/COL27A1/COL4A3/COL16A1
MF	GO:0050840	extracellular matrix binding	44	0.73664	2.20492	1.89292e-06	0.000197796	0.000173916	951	tags=39%, list=7%, signal=36%	SPARCL1/DCN/SPARC/CD248/PXDN/SSC5D/BGN/OLFML2B/FBLN2/ITGB3/LGALS1/OLFML2A/ADAMTS15/TGFBI/THBS1/ITGB1/ELN
CC	GO:0005604	basement membrane	68	0.67851	2.20067	1.57794e-07	2.40156e-05	2.11163e-05	1660	tags=44%, list=12%, signal=39%	COL8A1/THBS2/SPARC/PXDN/FBN1/COL5A1/LAMA2/AMTN/TIMP3/FN1/CCDC80/LAMA4/EFEMP2/LOXL2/COL7A1/COL4A1/COL4A2/NID2/TNC/LOXL1/FBLN1/TGFBI/EFNA5/COL4A3/APLP1/P3H2/NID1/VWA1/COL4A4/AGRN
CC	GO:0030312	external encapsulating structure	343	0.541286	2.1541	1e-10	4.23968e-08	3.72783e-08	1303	tags=35%, list=10%, signal=32%	MGP/SPARCL1/POSTN/COL1A2/SULF1/DCN/COL8A1/THBS2/AEBP1/SPARC/CD248/COL6A3/FBLN5/PXDN/SSC5D/EMILIN1/LOX/BGN/LRRC32/COL5A2/CTHRC1/COL6A2/FBN1/CCBE1/MMP2/ADAMTS2/MMP13/LUM/COL1A1/COL5A1/FMOD/EPYC/EDIL3/OLFML2B/CRISPLD2/LAMA2/CHI3L1/PCOLCE/LTBP2/AMTN/CSPG4/TIMP3/ADAMTS10/FN1/CCDC80/WNT5A/FBLN2/CDH13/FGF1/LAMA4/HTRA1/EFEMP1/MATN3/EFEMP2/MFAP2/SRPX/SERPINE1/ADAMTS7/LRRC17/ANOS1/IGFBP7/LOXL2/ADAM19/MMP19…
CC	GO:0031012	extracellular matrix	343	0.541286	2.1541	1e-10	4.23968e-08	3.72783e-08	1303	tags=35%, list=10%, signal=32%	MGP/SPARCL1/POSTN/COL1A2/SULF1/DCN/COL8A1/THBS2/AEBP1/SPARC/CD248/COL6A3/FBLN5/PXDN/SSC5D/EMILIN1/LOX/BGN/LRRC32/COL5A2/CTHRC1/COL6A2/FBN1/CCBE1/MMP2/ADAMTS2/MMP13/LUM/COL1A1/COL5A1/FMOD/EPYC/EDIL3/OLFML2B/CRISPLD2/LAMA2/CHI3L1/PCOLCE/LTBP2/AMTN/CSPG4/TIMP3/ADAMTS10/FN1/CCDC80/WNT5A/FBLN2/CDH13/FGF1/LAMA4/HTRA1/EFEMP1/MATN3/EFEMP2/MFAP2/SRPX/SERPINE1/ADAMTS7/LRRC17/ANOS1/IGFBP7/LOXL2/ADAM19/MMP19…
CC	GO:0062023	collagen-containing extracellular matrix	278	0.547851	2.13382	1e-10	4.23968e-08	3.72783e-08	1016	tags=31%, list=8%, signal=29%	MGP/SPARCL1/POSTN/COL1A2/SULF1/DCN/COL8A1/THBS2/AEBP1/SPARC/COL6A3/FBLN5/PXDN/SSC5D/EMILIN1/LOX/BGN/COL5A2/CTHRC1/COL6A2/FBN1/MMP2/ADAMTS2/LUM/COL1A1/COL5A1/FMOD/EDIL3/LAMA2/PCOLCE/LTBP2/AMTN/CSPG4/TIMP3/ADAMTS10/FN1/CCDC80/WNT5A/FBLN2/CDH13/LAMA4/HTRA1/EFEMP1/MATN3/EFEMP2/MFAP2/SRPX/SERPINE1/IGFBP7/LOXL2/ADAM19/ICAM1/COL7A1/LGALS1/CDH2/NAV2/COL4A1/CXCL12/TGFB1I1/ANGPTL2/COL4A2/TGM2/NID2/COL12A1/…
BP	GO:0032964	collagen biosynthetic process	35	0.74157	2.12114	5.4381e-06	0.000481926	0.000423744	2013	tags=57%, list=15%, signal=49%	EMILIN1/ENG/RCN3/DDR2/COL1A1/COL5A1/PCOLCE/SCX/INHBA/LARP6/P3H3/SERPINH1/RGCC/TGFB3/IHH/UCN/FOSL2/RUNX1/TRAM2/VIM
BP	GO:0032963	collagen metabolic process	74	0.65189	2.11552	2.87912e-07	4.03135e-05	3.54466e-05	1421	tags=45%, list=11%, signal=40%	COL1A2/FAP/EMILIN1/ENG/MMP2/RCN3/ADAMTS2/MMP13/DDR2/CTSK/COL1A1/COL5A1/PCOLCE/SCX/INHBA/MMP19/MMP10/MMP3/LARP6/MRC2/ITGB1/P3H3/MMP14/RETREG3/TNS2/SERPINH1/P3H2/RGCC/ADAMTS14/TGFB3/FURIN/IHH/HIF1A
BP	GO:0021675	nerve development	54	0.676849	2.10706	8.48088e-06	0.000664241	0.000584049	1200	tags=31%, list=9%, signal=29%	SULF1/NPTX1/ACKR3/EDNRA/ITGA4/HOXB2/SLC1A3/GLI3/NTF4/KCNC1/NRTN/NAV2/EPHB2/SALL1/CTNNB1/PLXNA3/NPR2
BP	GO:0035904	aorta development	47	0.694552	2.10638	7.99589e-06	0.000649772	0.000571327	1259	tags=34%, list=9%, signal=31%	PDGFRB/LOX/ENG/TBX2/EDNRA/PLXND1/EFEMP2/NKX3-1/ADAMTS6/LOXL1/FKBP10/DLL4/AP2B1/SRF/FOXH1/NDST1
CC	GO:0098644	complex of collagen trimers	16	0.882091	2.08817	3.62505e-06	0.000347657	0.000305685	1016	tags=75%, list=8%, signal=69%	COL1A2/COL8A1/COL5A2/LUM/COL1A1/COL5A1/COL7A1/COL4A1/COL4A2/COL5A3/COL27A1/COL4A3
MF	GO:0001968	fibronectin binding	22	0.791763	2.06806	9.40468e-05	0.0044717	0.00393185	788	tags=50%, list=6%, signal=47%	SSC5D/IGFBP5/ITGA4/MMP2/TNFAIP6/CTSK/CCDC80/ITGB3/FBLN1/THBS1/ITGB1
BP	GO:0072577	endothelial cell apoptotic process	39	0.702916	2.06806	3.69251e-05	0.00208677	0.00183484	1211	tags=36%, list=9%, signal=33%	CD248/ITGA4/IL10/ITGB3/CD40/SERPINE1/SCG2/CCL2/ICAM1/ANGPTL4/THBS1/PLCG1/COL4A3/RGCC
BP	GO:0060840	artery development	77	0.629664	2.05061	2.9296e-06	0.00029157	0.00025637	1917	tags=39%, list=14%, signal=34%	PDGFRB/PRRX1/LOX/ENG/TBX2/EDNRA/GLI3/PLXND1/EFEMP2/NOG/NKX3-1/ADAMTS6/LOXL1/FKBP10/TGFBR1/DLL4/FOXC1/AP2B1/SRF/FOXH1/NDST1/WNT11/APOE/LDLR/TGFB2/SMAD7/NOTCH3/NRP1/JAG1/RBPJ
BP	GO:0048514	blood vessel morphogenesis	438	0.507006	2.04868	1e-10	4.23968e-08	3.72783e-08	1469	tags=25%, list=11%, signal=23%	HSPB6/THY1/SULF1/DCN/COL8A1/ADGRA2/PDGFRB/THBS2/SPARC/PRRX1/TWIST1/PLXDC1/FAP/PXDN/EMILIN1/LOX/ENG/ACKR3/TBX2/EDNRA/CCBE1/MMP2/NPR3/VSTM4/IL10/CHI3L1/LEF1/PDGFRA/CSPG4/FN1/WNT5A/ARHGAP22/PLXND1/CDH13/FGF1/E2F7/EFEMP2/ITGA5/ITGB3/CD40/SERPINE1/SCG2/NOG/LOXL2/MMP19/KLF2/CCL2/CDH2/COL4A1/MCAM/COL4A2/EPHB2/MEIS1/GHRL/CCN2/FLNA/CCR3/RECK/GPNMB/TBX6/TGFBI/VASH1/ANGPTL4/TNFSF12/FZD8/FKBP10/TGFBR1/SMO/IL…
BP	GO:0001525	angiogenesis	375	0.510357	2.03868	1e-10	4.23968e-08	3.72783e-08	1469	tags=25%, list=11%, signal=23%	HSPB6/THY1/SULF1/DCN/COL8A1/ADGRA2/PDGFRB/THBS2/SPARC/TWIST1/PLXDC1/FAP/PXDN/EMILIN1/ENG/ACKR3/EDNRA/CCBE1/MMP2/NPR3/VSTM4/IL10/CHI3L1/LEF1/PDGFRA/CSPG4/FN1/WNT5A/ARHGAP22/PLXND1/CDH13/FGF1/E2F7/ITGA5/ITGB3/CD40/SERPINE1/SCG2/LOXL2/MMP19/KLF2/CCL2/COL4A1/MCAM/COL4A2/EPHB2/MEIS1/GHRL/CCN2/FLNA/CCR3/RECK/GPNMB/TGFBI/VASH1/ANGPTL4/TNFSF12/FZD8/TGFBR1/IL1B/THBS1/ITGB1/PLCG1/PIK3CD/C3/CTNNB1/SPHK1/DLL…
BP	GO:0060021	roof of mouth development	66	0.622945	2.00651	3.07547e-05	0.00182342	0.00160328	1739	tags=33%, list=13%, signal=29%	PRRX1/TWIST1/LRRC32/TBX2/GLI3/LEF1/PDGFRA/WNT5A/FZD2/INHBA/SNAI2/EPHB2/ITGB6/SNAI1/TGFBR1/INSIG1/WNT7A/WNT11/TGFB3/TGFB2/SGPL1/OSR1
BP	GO:0051216	cartilage development	147	0.559828	2.00445	2.39766e-07	3.57011e-05	3.1391e-05	1768	tags=35%, list=13%, signal=31%	MGP/SULF1/PRRX1/BGN/MMP13/CTSK/COL1A1/BMPR1B/EPYC/GLI3/CHI3L1/WNT5A/EFEMP1/MATN3/SCX/ADAMTS7/BBS1/NOG/LOXL2/SNAI2/ZEB1/GHRL/CCN2/TGFBI/SLC26A2/SNAI1/CHSY1/RUNX2/TGFBR1/WNT5B/CTNNB1/COL27A1/WNT7A/RFLNA/SRF/SERPINH1/NPR2/WNT11/MBOAT2/HYAL3/IHH/HIF1A/BMP1/RARA/BMP8B/MEX3C/MAF/SMAD7/OSR1/SULF2/FOSL2/SLC39A14
BP	GO:0001706	endoderm formation	45	0.664322	1.99949	9.65055e-05	0.00453446	0.00398703	1057	tags=36%, list=8%, signal=33%	COL8A1/COL5A2/ITGA4/MMP2/COL5A1/FN1/ITGA5/INHBA/NOG/COL7A1/COL4A2/COL12A1/COL6A1/CTNNB1/SOX2/MMP14
CC	GO:0098685	Schaffer collateral - CA1 synapse	60	0.631841	1.9934	2.20157e-05	0.00141406	0.00124334	1047	tags=23%, list=8%, signal=22%	CDH11/SRGN/PLAT/ADCY1/WNT5A/TAMALIN/GHRL/PTPRS/SYP/ITGB1/PLCG1/DVL1/CTNNB1/WNT7A
BP	GO:0048706	embryonic skeletal system development	69	0.61515	1.99258	3.91102e-05	0.00215599	0.0018957	1391	tags=30%, list=10%, signal=27%	SULF1/PRRX1/TWIST1/EDNRA/HOXB2/COL1A1/GLI3/PDGFRA/WNT5A/SCX/NOG/ZEB1/MDFI/RUNX2/TGFBR1/CTNNB1/MMP14/NDST1/WNT11/TGFB3/IHH
BP	GO:0060384	innervation	18	0.806272	1.99096	0.000244899	0.00921795	0.00810509	309	tags=28%, list=2%, signal=27%	SULF1/NPTX1/EDNRA/ITGA4/NTF4
BP	GO:0035987	endodermal cell differentiation	39	0.67603	1.98896	0.00018861	0.00785986	0.00691096	1057	tags=38%, list=8%, signal=36%	COL8A1/COL5A2/ITGA4/MMP2/COL5A1/FN1/ITGA5/INHBA/COL7A1/COL4A2/COL12A1/COL6A1/CTNNB1/SOX2/MMP14
BP	GO:2000351	regulation of endothelial cell apoptotic process	33	0.700612	1.97651	0.000199342	0.00825795	0.00726099	841	tags=33%, list=6%, signal=31%	CD248/ITGA4/ITGB3/CD40/SERPINE1/SCG2/CCL2/ICAM1/ANGPTL4/THBS1/PLCG1
BP	GO:0048844	artery morphogenesis	52	0.624691	1.94545	0.00032664	0.0114915	0.0101042	1917	tags=42%, list=14%, signal=36%	PDGFRB/PRRX1/ENG/TBX2/EDNRA/EFEMP2/NOG/FKBP10/TGFBR1/DLL4/FOXC1/SRF/FOXH1/WNT11/APOE/LDLR/TGFB2/SMAD7/NOTCH3/NRP1/JAG1/RBPJ
BP	GO:0071560	cellular response to transforming growth factor beta stimulus	206	0.516611	1.93891	5.91666e-08	1.01031e-05	8.88334e-06	1518	tags=21%, list=11%, signal=19%	POSTN/COL1A2/ZEB2/EMILIN1/LOX/LRRC32/ENG/FBN1/DDR2/CTSK/COL1A1/FMOD/LTBP2/WNT5A/HTRA1/FERMT2/SCX/ANKRD1/TGFB1I1/ZEB1/COL4A2/ITGB6/SNX25/TGFBR1/NFKBIZ/THBS1/LTBP4/NREP/LDLRAD4/LTBP1/PMEPA1/CDKN2B/PDE3A/PEG10/WNT7A/NFATC1/FOXH1/SPRED3/TGFB3/FURIN/ACVR1/TGFB2/DKK3/CD109
BP	GO:0038084	vascular endothelial growth factor signaling pathway	28	0.700907	1.93376	0.000446425	0.0146733	0.0129019	2073	tags=50%, list=15%, signal=42%	DCN/ADGRA2/PDGFRB/EMILIN1/CCBE1/PDGFRA/PIK3CD/FOXC1/XDH/HSPB1/GAB1/NRP1/VEGFB/CADM4
BP	GO:0001501	skeletal system development	346	0.485228	1.92989	8.05905e-10	2.4531e-07	2.15695e-07	1768	tags=27%, list=13%, signal=24%	MGP/CDH11/COL1A2/SULF1/PRRX1/TWIST1/LOX/BGN/COL5A2/ENG/EDNRA/FBN1/HOXB2/MMP2/MMP13/NPR3/DDR2/CTSK/COL1A1/BMPR1B/EPYC/HES7/GLI3/CHI3L1/PDGFRA/WNT5A/HHIP/GPR68/EFEMP1/MATN3/SCX/ADAMTS7/LRRC17/BBS1/NOG/LOXL2/TP63/SNAI2/ZEB1/GHRL/TGM2/CCN2/MDFI/ITGB6/TGFBI/SLC26A2/SNAI1/CHSY1/RUNX2/TGFBR1/WNT5B/CHRD/MAPK11/RPL38/GJA1/INPPL1/CTNNB1/INSIG1/PDGFC/COL27A1/FOXC1/WNT7A/MMP14/RFLNA/SRF/SH3PXD2B/SERPINH1/HAP…
BP	GO:0071559	response to transforming growth factor beta	211	0.50927	1.91952	9.04412e-08	1.47251e-05	1.29474e-05	1518	tags=21%, list=11%, signal=19%	POSTN/COL1A2/ZEB2/EMILIN1/LOX/LRRC32/ENG/FBN1/DDR2/CTSK/COL1A1/FMOD/LTBP2/WNT5A/HTRA1/FERMT2/SCX/ANKRD1/TGFB1I1/ZEB1/COL4A2/ITGB6/SNX25/TGFBR1/NFKBIZ/THBS1/LTBP4/NREP/LDLRAD4/LTBP1/PMEPA1/CDKN2B/PDE3A/PEG10/WNT7A/NFATC1/FNDC4/FOXH1/SPRED3/TGFB3/FURIN/ACVR1/TGFB2/DKK3/CD109
BP	GO:0051383	kinetochore organization	20	0.753666	1.91317	0.00087759	0.023814	0.020939	325	tags=20%, list=2%, signal=20%	CENPA/NUF2/NDC80/CENPF
BP	GO:0007492	endoderm development	62	0.598657	1.9096	0.000202959	0.00833179	0.00732592	1057	tags=26%, list=8%, signal=24%	COL8A1/COL5A2/ITGA4/MMP2/COL5A1/FN1/ITGA5/INHBA/NOG/COL7A1/COL4A2/COL12A1/COL6A1/CTNNB1/SOX2/MMP14
BP	GO:0001704	formation of primary germ layer	91	0.568437	1.90948	1.08501e-05	0.000783106	0.000688564	1260	tags=32%, list=9%, signal=29%	COL8A1/COL5A2/ITGA4/MMP2/COL5A1/LEF1/FN1/WNT5A/ITGA5/ITGB3/SCX/INHBA/NOG/COL7A1/FZD7/COL4A2/COL12A1/TBX6/SNAI1/ITGB1/GJA1/COL6A1/EYA2/CTNNB1/SOX2/FOXC1/MMP14/SRF/WNT11
BP	GO:1904645	response to amyloid-beta	28	0.692036	1.90929	0.000666681	0.0200319	0.0176135	932	tags=36%, list=7%, signal=33%	ITGA4/MMP2/MMP13/CD36/ICAM1/MMP3/CACNB1/EPHB2/GJA1/TLR6
BP	GO:1904888	cranial skeletal system development	49	0.62005	1.90853	0.00026056	0.00965177	0.00848654	1589	tags=35%, list=12%, signal=31%	PRRX1/TWIST1/EDNRA/GLI3/PDGFRA/NOG/CEP55/TP63/RUNX2/TGFBR1/CTNNB1/INSIG1/MMP14/NDST1/TGFB3/TGFB2/RAB23
BP	GO:0085029	extracellular matrix assembly	34	0.673017	1.90052	0.000551226	0.0173835	0.0152848	1391	tags=38%, list=10%, signal=34%	COL1A2/FBLN5/PXDN/EMILIN1/LOX/EFEMP2/ANTXR1/FKBP10/TGFBR1/PHLDB1/ELN/RGCC/IHH
BP	GO:0045765	regulation of angiogenesis	189	0.509211	1.89712	8.34112e-07	0.000106175	9.33567e-05	1024	tags=21%, list=8%, signal=19%	HSPB6/SULF1/DCN/ADGRA2/THBS2/SPARC/TWIST1/EMILIN1/ENG/CCBE1/IL10/CHI3L1/WNT5A/PLXND1/FGF1/ITGA5/ITGB3/CD40/SERPINE1/KLF2/COL4A2/GHRL/CCR3/RECK/GPNMB/VASH1/ANGPTL4/TNFSF12/IL1B/THBS1/ITGB1/PLCG1/PIK3CD/C3/CTNNB1/SPHK1/FOXC1/COL4A3/ADAM12
BP	GO:0090102	cochlea development	23	0.722172	1.89688	0.00113845	0.0280461	0.0246602	950	tags=39%, list=7%, signal=36%	CTHRC1/TBX2/WNT5A/FZD2/PTK7/ZEB1/TBX18/DVL1/MCM2
BP	GO:0060324	face development	42	0.639608	1.8963	0.00067559	0.0202128	0.0177726	348	tags=21%, list=3%, signal=21%	EDNRA/MMP2/COL1A1/CRISPLD2/LEF1/PDGFRA/WNT5A/SCX/NOG
BP	GO:1901342	regulation of vasculature development	191	0.50696	1.89325	7.06744e-07	9.33569e-05	8.20862e-05	1024	tags=20%, list=8%, signal=19%	HSPB6/SULF1/DCN/ADGRA2/THBS2/SPARC/TWIST1/EMILIN1/ENG/CCBE1/IL10/CHI3L1/WNT5A/PLXND1/FGF1/ITGA5/ITGB3/CD40/SERPINE1/KLF2/COL4A2/GHRL/CCR3/RECK/GPNMB/VASH1/ANGPTL4/TNFSF12/IL1B/THBS1/ITGB1/PLCG1/PIK3CD/C3/CTNNB1/SPHK1/FOXC1/COL4A3/ADAM12
BP	GO:0061035	regulation of cartilage development	52	0.607406	1.89162	0.000724587	0.0212252	0.0186628	1601	tags=42%, list=12%, signal=37%	CTSK/BMPR1B/GLI3/WNT5A/EFEMP1/SCX/ADAMTS7/NOG/LOXL2/SNAI2/CCN2/RUNX2/TGFBR1/CTNNB1/RFLNA/WNT11/MBOAT2/IHH/BMP1/RARA/MAF/SMAD7
CC	GO:0005925	focal adhesion	355	0.474117	1.89034	4.02847e-09	9.4011e-07	8.26613e-07	2109	tags=23%, list=16%, signal=20%	THY1/ITGBL1/PDGFRB/CNN1/FAP/ENG/ITGA4/ALOX15B/LCP1/DDR2/SCARF2/CSPG4/ARHGAP22/CDH13/FZD2/TNS1/FERMT2/LAYN/LIMS2/ITGA5/ITGB3/KIF23/PTK7/ICAM1/FLNC/CDH2/NOX4/ITGA11/TGFB1I1/MCAM/MRC2/NEXN/TGM2/TNC/FLNA/ITGB6/ARHGAP31/AVIL/ITGB1/RPL38/GJA1/RPL37A/CTNNB1/RPS29/PLAU/TPM4/MMP14/TNS2/MSN/RPL31/PALLD/CBL/ALKBH6/AJUBA/PIP5K1A/VCL/HSPB1/RPLP2/ACTB/SHC1/LIMK1/CNN2/TNS4/DIXDC1/ITGAV/TSPAN9/DCTN4/PLEC/TRIP6/N…
BP	GO:0032967	positive regulation of collagen biosynthetic process	22	0.723609	1.89004	0.00185567	0.0380984	0.0334989	2013	tags=50%, list=15%, signal=43%	ENG/DDR2/SCX/INHBA/LARP6/RGCC/TGFB3/IHH/UCN/RUNX1/VIM
MF	GO:0005178	integrin binding	103	0.554281	1.88655	3.31275e-05	0.00191674	0.00168534	788	tags=27%, list=6%, signal=26%	THY1/ITGBL1/FBLN5/FAP/EMILIN1/FBN1/ITGA4/LCP1/COL5A1/EDIL3/FN1/FGF1/FERMT2/ITGA5/ITGB3/ICAM1/CXCL12/ITGA11/ITGA10/CCN2/ITGB6/GPNMB/FBLN1/TGFBI/IL1B/THBS1/LTBP4/ITGB1
BP	GO:1904019	epithelial cell apoptotic process	97	0.553123	1.88397	6.48261e-05	0.00319611	0.00281025	1263	tags=23%, list=9%, signal=21%	CD248/EDNRA/ITGA4/IL10/LEF1/ITGB3/CD40/SERPINE1/SCG2/CCL2/ICAM1/ANGPTL4/NFKBIZ/THBS1/PLCG1/NPC1/COL4A3/TMEM258/CARM1/RGCC/WNT11/E2F1
BP	GO:0001504	neurotransmitter uptake	20	0.741917	1.88334	0.00152468	0.0336729	0.0296077	788	tags=40%, list=6%, signal=38%	SLC1A3/ITGB3/SLC18A2/SLC29A1/SLC22A3/SNAP25/DRD1/ITGB1
BP	GO:0061037	negative regulation of cartilage development	20	0.741895	1.88328	0.00152468	0.0336729	0.0296077	1465	tags=60%, list=11%, signal=54%	CTSK/GLI3/EFEMP1/ADAMTS7/NOG/SNAI2/TGFBR1/CTNNB1/RFLNA/WNT11/IHH/RARA
BP	GO:0048634	regulation of muscle organ development	15	0.801014	1.88244	0.00181593	0.0373922	0.032878	325	tags=27%, list=2%, signal=26%	TWIST1/LOX/LEF1/CENPF
CC	GO:0030055	cell-substrate junction	362	0.471732	1.88088	3.96371e-09	9.4011e-07	8.26613e-07	2109	tags=23%, list=16%, signal=20%	THY1/ITGBL1/PDGFRB/CNN1/FAP/ENG/ITGA4/ALOX15B/LCP1/DDR2/SCARF2/CSPG4/ARHGAP22/CDH13/FZD2/TNS1/FERMT2/LAYN/LIMS2/ITGA5/ITGB3/KIF23/PTK7/ICAM1/FLNC/CDH2/NOX4/ITGA11/TGFB1I1/MCAM/MRC2/NEXN/TGM2/TNC/FLNA/EPPK1/ITGB6/ARHGAP31/AVIL/ITGB1/RPL38/GJA1/RPL37A/CTNNB1/RPS29/PLAU/TPM4/MMP14/TNS2/MSN/RPL31/PALLD/CBL/ALKBH6/AJUBA/PIP5K1A/VCL/HSPB1/RPLP2/ACTB/SHC1/LIMK1/CNN2/TNS4/DIXDC1/ITGAV/TSPAN9/DCTN4/PLEC/T…
MF	GO:0050431	transforming growth factor beta binding	18	0.761093	1.8794	0.00157698	0.0344824	0.0303194	1610	tags=61%, list=12%, signal=54%	LRRC32/ENG/CD36/TGFBR1/THBS1/LTBP4/LTBP1/TGFB3/ACVR1/CD109/ITGAV
BP	GO:0090103	cochlea morphogenesis	12	0.833297	1.87888	0.000847409	0.0234495	0.0206185	871	tags=67%, list=6%, signal=62%	CTHRC1/TBX2/WNT5A/FZD2/PTK7/ZEB1/TBX18/DVL1
BP	GO:1903053	regulation of extracellular matrix organization	49	0.607957	1.8713	0.000450497	0.014738	0.0129587	1439	tags=31%, list=11%, signal=27%	AEBP1/FAP/EMILIN1/DDR2/LAMA2/EFEMP2/ITGB3/ANTXR1/TGFBR1/PHLDB1/COLGALT1/RGCC/ZNF469/MELTF/NID1
BP	GO:0016202	regulation of striated muscle tissue development	13	0.831402	1.87126	0.000843426	0.0234318	0.020603	325	tags=31%, list=2%, signal=30%	TWIST1/LOX/LEF1/CENPF
BP	GO:0003180	aortic valve morphogenesis	26	0.70291	1.86939	0.000825168	0.0232867	0.0204754	1064	tags=35%, list=8%, signal=32%	CDH11/TWIST1/EMILIN1/SNAI2/SNAI1/SLIT3/ELN/DLL4/NFATC1
BP	GO:0010712	regulation of collagen metabolic process	30	0.669392	1.86209	0.00173911	0.0362366	0.0318619	2013	tags=47%, list=15%, signal=40%	FAP/EMILIN1/ENG/DDR2/SCX/INHBA/LARP6/ITGB1/RGCC/TGFB3/IHH/UCN/RUNX1/VIM
BP	GO:0045766	positive regulation of angiogenesis	111	0.538691	1.86119	4.43159e-05	0.00238658	0.00209846	2236	tags=38%, list=17%, signal=32%	HSPB6/TWIST1/EMILIN1/ENG/CCBE1/IL10/CHI3L1/WNT5A/FGF1/ITGA5/ITGB3/CD40/SERPINE1/GHRL/CCR3/ANGPTL4/TNFSF12/IL1B/THBS1/ITGB1/PLCG1/PIK3CD/C3/SPHK1/ADAM12/ZC3H12A/F3/SASH1/HSPB1/HIF1A/GAB1/ZNF304/ABL1/RAPGEF3/NRP1/RUNX1/VEGFB/CXCL8/FUT1/ETS1/FGF2/HMGA2
BP	GO:1904018	positive regulation of vasculature development	111	0.538691	1.86119	4.43159e-05	0.00238658	0.00209846	2236	tags=38%, list=17%, signal=32%	HSPB6/TWIST1/EMILIN1/ENG/CCBE1/IL10/CHI3L1/WNT5A/FGF1/ITGA5/ITGB3/CD40/SERPINE1/GHRL/CCR3/ANGPTL4/TNFSF12/IL1B/THBS1/ITGB1/PLCG1/PIK3CD/C3/SPHK1/ADAM12/ZC3H12A/F3/SASH1/HSPB1/HIF1A/GAB1/ZNF304/ABL1/RAPGEF3/NRP1/RUNX1/VEGFB/CXCL8/FUT1/ETS1/FGF2/HMGA2
CC	GO:0031258	lamellipodium membrane	18	0.751915	1.85674	0.00222459	0.0430231	0.0378291	857	tags=44%, list=6%, signal=42%	FAP/CSPG4/PLXND1/FERMT2/ITGB3/ANTXR1/DOCK8/PIEZO1
BP	GO:0014909	smooth muscle cell migration	56	0.592759	1.85635	0.000618426	0.0191575	0.0168447	2367	tags=34%, list=18%, signal=28%	POSTN/PDGFRB/PLAT/IGFBP5/DDR2/ITGB3/SERPINE1/PDGFB/PLAU/TPM1/LPAR1/SSH1/GRB10/NRP1/FOXO4/PDGFA/IGFBP3/PLXNA1/DOCK4
BP	GO:0048745	smooth muscle tissue development	19	0.74147	1.8545	0.0017646	0.0366586	0.0322329	1765	tags=42%, list=13%, signal=37%	ENG/EFEMP2/SMO/SRF/NPR2/IHH/OSR1/FOSL2
BP	GO:0001569	branching involved in blood vessel morphogenesis	25	0.699245	1.85371	0.00239714	0.0447588	0.0393552	1881	tags=48%, list=14%, signal=41%	ENG/EDNRA/LEF1/PLXND1/COL4A1/CTNNB1/DLL4/SRF/IHH/ACVR1/ABL1/NRP1
BP	GO:0003176	aortic valve development	31	0.664439	1.85094	0.00165869	0.0350841	0.0308485	1064	tags=29%, list=8%, signal=27%	CDH11/TWIST1/EMILIN1/SNAI2/SNAI1/SLIT3/ELN/DLL4/NFATC1
BP	GO:0009953	dorsal/ventral pattern formation	57	0.586687	1.84311	0.000434748	0.0144198	0.012679	1450	tags=26%, list=11%, signal=24%	HOXB2/BMPR1B/GLI3/GLI1/HHIP/NOG/MDFI/SMO/CHRD/CTNNB1/DLL4/PAX6/WNT7A/ACVR1/BMP1
BP	GO:0048562	embryonic organ morphogenesis	171	0.500206	1.83914	4.97906e-06	0.000446903	0.00039295	1421	tags=26%, list=11%, signal=23%	PRRX1/TWIST1/ENG/CTHRC1/TBX2/EDNRA/FBN1/HOXB2/GLI3/GLI1/PDGFRA/WNT5A/FZD2/EFEMP1/MFAP2/NOG/PTK7/ZEB1/EPHB2/MDFI/TBX6/RUNX2/TGFBR1/SMO/TBX18/MFAP5/RPL38/DVL1/VANGL2/CTNNB1/INSIG1/PAX6/MMP14/SRF/LRIG3/FOXH1/NDST1/WNT11/BBS5/TGFB3/IHH/PDZD7/ACVR1/HIF1A
BP	GO:0048598	embryonic morphogenesis	412	0.456108	1.83579	5.3343e-09	1.20469e-06	1.05925e-06	1760	tags=23%, list=13%, signal=20%	SULF1/COL8A1/PRRX1/TWIST1/COL5A2/ENG/CTHRC1/TBX2/EDNRA/FBN1/ITGA4/HOXB2/MMP2/COL5A1/GLI3/IL10/GLI1/LEF1/DACT1/PDGFRA/FN1/WNT5A/FZD2/EFEMP1/ITGA5/ITGB3/MFAP2/SCX/INHBA/NOG/PTK7/COL7A1/FZD7/TP63/TGFB1I1/ZEB1/COL4A2/EPHB2/COL12A1/MDFI/RECK/TBX6/SALL1/MYADM/SNAI1/RUNX2/TGFBR1/SMO/TBX18/WNT5B/MFAP5/ITGB1/RPL38/PHLDB1/GJA1/COL6A1/DVL1/VANGL2/EYA2/CTNNB1/INSIG1/DLL4/PAX6/SOX2/FOXC1/WNT7A/MMP14/SOCS3/SRF…
BP	GO:0034508	centromere complex assembly	27	0.675359	1.83531	0.00246096	0.0454869	0.0399954	1305	tags=26%, list=10%, signal=23%	CENPA/HJURP/CENPF/OIP5/CENPO/DLGAP5/CENPI
BP	GO:0043586	tongue development	10	0.860187	1.83468	0.00119799	0.0288217	0.0253421	924	tags=40%, list=7%, signal=37%	GLI3/LEF1/NTF4/CTNNB1
BP	GO:0032965	regulation of collagen biosynthetic process	26	0.688112	1.83003	0.00128765	0.0299496	0.0263339	2013	tags=46%, list=15%, signal=39%	EMILIN1/ENG/DDR2/SCX/INHBA/LARP6/RGCC/TGFB3/IHH/UCN/RUNX1/VIM
BP	GO:0014812	muscle cell migration	66	0.566883	1.82593	0.000487035	0.015641	0.0137527	1585	tags=23%, list=12%, signal=20%	POSTN/PDGFRB/PLAT/IGFBP5/DDR2/ITGB3/SERPINE1/SMO/PDGFB/PLEKHO1/PLAU/TPM1/LPAR1/SSH1/GRB10
BP	GO:0062009	secondary palate development	19	0.728955	1.82319	0.00279372	0.0485562	0.0426942	1469	tags=47%, list=11%, signal=42%	LRRC32/LEF1/WNT5A/FZD2/ITGB6/WNT7A/WNT11/TGFB3/TGFB2
BP	GO:0010718	positive regulation of epithelial to mesenchymal transition	47	0.600934	1.82246	0.00161381	0.0346573	0.0304732	1469	tags=36%, list=11%, signal=32%	TWIST1/ENG/COL1A1/LEF1/FERMT2/GLIPR2/LOXL2/TGFB1I1/SNAI1/TGFBR1/IL1B/CTNNB1/FOXC1/RGCC/TGFB3/ACVR1/TGFB2
CC	GO:0001527	microfibril	10	0.854306	1.82214	0.00161381	0.0346573	0.0304732	940	tags=70%, list=7%, signal=65%	FBN1/ADAMTS10/EFEMP2/MFAP2/MFAP5/LTBP4/LTBP1
BP	GO:1905314	semi-lunar valve development	33	0.645048	1.81975	0.00202058	0.0404174	0.0355379	1917	tags=39%, list=14%, signal=34%	CDH11/TWIST1/EMILIN1/SNAI2/SNAI1/SLIT3/ELN/DLL4/NFATC1/TGFB2/NOTCH2/JAG1/RBPJ
BP	GO:0032835	glomerulus development	48	0.594453	1.81653	0.000946629	0.0247289	0.0217435	1893	tags=40%, list=14%, signal=34%	SULF1/PDGFRB/EDNRA/PDGFRA/ITGB3/NOG/EGR1/PDGFB/BASP1/FOXC1/COL4A3/PODXL/NID1/COL4A4/NOTCH2/NOTCH3/OSR1/SULF2/JAG1
BP	GO:0014911	positive regulation of smooth muscle cell migration	29	0.65787	1.81373	0.00250164	0.045848	0.0403129	289	tags=17%, list=2%, signal=17%	POSTN/PDGFRB/IGFBP5/DDR2/ITGB3
BP	GO:0061448	connective tissue development	211	0.479797	1.80843	2.10195e-06	0.000216408	0.000190282	1543	tags=27%, list=11%, signal=24%	MGP/SULF1/PDGFRB/PRRX1/LOX/BGN/FOXD1/MMP13/CTSK/COL1A1/COL5A1/BMPR1B/EPYC/GLI3/CHI3L1/WNT5A/EFEMP1/MATN3/ITGB3/SCX/ADAMTS7/BBS1/NOG/LOXL2/SNAI2/ZEB1/GHRL/CCN2/TGFBI/SLC26A2/SNAI1/CHSY1/EGR1/RUNX2/TGFBR1/WNT5B/PDGFB/CTNNB1/COL27A1/WNT7A/KLF7/RFLNA/SRF/SH3PXD2B/SERPINH1/NPR2/WNT11/MBOAT2/HYAL3/IHH/HIF1A/BMP1/RARA/BMP8B/MEX3C/CSF1/MAF
BP	GO:0014910	regulation of smooth muscle cell migration	50	0.58717	1.80788	0.00141275	0.0321125	0.0282356	2367	tags=34%, list=18%, signal=28%	POSTN/PDGFRB/IGFBP5/DDR2/ITGB3/SERPINE1/PDGFB/PLAU/TPM1/LPAR1/SSH1/NRP1/FOXO4/PDGFA/IGFBP3/PLXNA1/DOCK4
BP	GO:1904037	positive regulation of epithelial cell apoptotic process	26	0.679759	1.80782	0.00172029	0.0359515	0.0316112	1260	tags=35%, list=9%, signal=31%	CD248/ITGA4/CD40/CCL2/THBS1/PLCG1/CARM1/RGCC/WNT11
BP	GO:0031102	neuron projection regeneration	42	0.608471	1.80398	0.002606	0.0471547	0.0414619	1296	tags=24%, list=10%, signal=22%	THY1/PRRX1/MMP2/CSPG5/TNC/FLNA/PTPRS/NREP/MAP1B/ULK1
CC	GO:0031594	neuromuscular junction	51	0.582701	1.80076	0.00219932	0.0427706	0.0376071	1029	tags=20%, list=8%, signal=18%	POSTN/PDZRN3/LAMA2/RAPSN/SYNC/SYP/ITGB1/CDK5R1/SPOCK1/DLG4
BP	GO:0035909	aorta morphogenesis	26	0.67535	1.79609	0.00209113	0.0410084	0.0360576	2081	tags=46%, list=15%, signal=39%	PDGFRB/ENG/TBX2/EFEMP2/FKBP10/DLL4/SRF/FOXH1/TGFB2/JAG1/RBPJ/ADAMTS9
BP	GO:0048704	embryonic skeletal system morphogenesis	47	0.5921	1.79567	0.00232821	0.0444137	0.0390517	1363	tags=30%, list=10%, signal=27%	PRRX1/TWIST1/HOXB2/GLI3/PDGFRA/NOG/ZEB1/MDFI/RUNX2/TGFBR1/CTNNB1/MMP14/NDST1/TGFB3
MF	GO:0019838	growth factor binding	98	0.526515	1.79414	0.000636606	0.0194623	0.0171127	1518	tags=32%, list=11%, signal=28%	COL1A2/PDGFRB/PXDN/LRRC32/ENG/IGFBP5/COL1A1/COL5A1/LTBP2/PDGFRA/CD36/HTRA1/ITGB3/IGFBP7/COL4A1/CCN2/OSMR/TGFBR1/THBS1/LTBP4/PDGFB/LIFR/COL6A1/LTBP1/SRPX2/TGFB3/FURIN/ACVR1/SHC1/RHBDF2/CD109
BP	GO:0007088	regulation of mitotic nuclear division	101	0.526681	1.792	0.000206559	0.00839575	0.00738216	1211	tags=20%, list=9%, signal=18%	PDGFRB/DMRT1/CCDC8/NUF2/PLK1/MKI67/NEK2/NDC80/CENPF/AURKB/BUB1/CDCA2/UBE2C/BIRC5/IL1B/PDGFB/SPHK1/SPC24/DLGAP5/RGCC
MF	GO:0019199	transmembrane receptor protein kinase activity	49	0.582076	1.79164	0.00156407	0.0343808	0.0302301	940	tags=31%, list=7%, signal=29%	PDGFRB/ENG/DDR2/BMPR1B/PDGFRA/EFEMP1/ROS1/LTK/EPHB2/PDGFRL/EFNB3/TGFBR1/LTBP4/AXL/LTBP1
BP	GO:0007179	transforming growth factor beta receptor signaling pathway	159	0.488051	1.78776	3.69603e-05	0.00208677	0.00183484	1601	tags=21%, list=12%, signal=19%	COL1A2/ZEB2/EMILIN1/LOX/LRRC32/ENG/FBN1/FMOD/LTBP2/HTRA1/FERMT2/TGFB1I1/ZEB1/ITGB6/SNX25/TGFBR1/THBS1/LTBP4/NREP/LDLRAD4/LTBP1/PMEPA1/CDKN2B/PEG10/FOXH1/SPRED3/TGFB3/FURIN/ACVR1/TGFB2/DKK3/CD109/SMAD7
BP	GO:0010761	fibroblast migration	51	0.57797	1.78614	0.00235782	0.0446901	0.0392948	2895	tags=45%, list=21%, signal=36%	CD248/ZEB2/DDR2/TNS1/ITGB3/THBS1/ITGB1/CLN3/PIP5K1A/ARHGAP4/SGPL1/PLEC/MTA2/PRR5L/FGF2/PRKCE/AKT1/SDC4/IQGAP1/PML/FUT8/FER/TGFB1
BP	GO:0061564	axon development	329	0.448708	1.77711	2.44772e-07	3.57011e-05	3.1391e-05	2053	tags=29%, list=15%, signal=25%	THY1/CDH11/NPTX1/TRPV2/EDNRA/ITGA4/SEMA3G/MMP2/FOXD1/BMPR1B/NOVA2/ADCY1/TSPAN2/GLI3/LAMA2/MAP1A/FEZ1/FN1/WNT5A/PLXND1/KIF5A/CSPG5/NOG/ANOS1/PTK7/CDH2/CXCL12/EPHB2/NEXN/TNC/FLNA/DRAXIN/PTPRS/SNAP25/UNC5A/APBB1/EFNB3/SMO/SLIT3/NUMBL/ITGB1/DVL1/NREP/CDK5R1/PAX6/WDR47/EFNA5/PLXNA3/WNT7A/KLF7/NMNAT2/SEMA3C/MAP1B/SRF/APLP1/PALLD/NPR2/ULK1/APOE/ARHGAP4/VCL/B3GNT2/SEMA4C/CHN1/SLC9A6/ACTB/LIMK1/GDI1/ARTN/…
BP	GO:2000146	negative regulation of cell motility	214	0.46806	1.773	6.67732e-06	0.000577135	0.000507459	1601	tags=20%, list=12%, signal=18%	THY1/CDH11/SULF1/DCN/ZEB2/EMILIN1/ENG/IGFBP5/ALOX15B/GNRH1/TNFAIP6/MCTP1/SERPINE1/NOG/CCL2/CXCL12/DPYSL3/ARHGDIB/EPPK1/RECK/FBLN1/VASH1/WAS/ADA/THBS1/CHRD/GJA1/LDLRAD4/DLL4/SRF/TPM1/RGCC/RABGEF1/WNT11/APOE/ARHGAP4/VCL/ADGRG1/PTPRG/TP53INP1/CNN2/SRGAP2/SMAD7
BP	GO:0031589	cell-substrate adhesion	259	0.456864	1.76548	2.62151e-06	0.000265988	0.000233876	1634	tags=25%, list=12%, signal=22%	THY1/POSTN/CDH11/ITGBL1/COL8A1/FBLN5/EMILIN1/ITGA4/COL1A1/EDIL3/FN1/CCDC80/FBLN2/CDH13/CD36/FERMT2/EFEMP2/LIMS2/ITGA5/ITGB3/ANTXR1/SERPINE1/CSPG5/GBP1/FZD7/ITGA11/ITGA10/KIF14/NID2/CCN2/FLNA/ITGB6/FBLN1/MYADM/SNED1/THBS1/ITGB1/PDGFB/COL5A3/AXL/CTNNB1/PPM1F/PLAU/SPOCK1/EFNA5/MMP14/SRF/UNC13D/AJUBA/COL16A1/TYRO3/PIP5K1A/VCL/CORO1A/MADCAM1/MELTF/NID1/CSF1/SGCE/SRGAP2/CDKN2A/ITGAV/DAPK3/LYPD3
BP	GO:0003179	heart valve morphogenesis	45	0.584793	1.76013	0.00272166	0.0478752	0.0420954	1616	tags=29%, list=12%, signal=26%	CDH11/TWIST1/EMILIN1/SCX/SNAI2/SNAI1/SLIT3/ELN/DLL4/NFATC1/ACVR1/TGFB2/NOTCH2
BP	GO:0007409	axonogenesis	293	0.448519	1.75903	1.76717e-06	0.000190338	0.000167359	2053	tags=30%, list=15%, signal=26%	THY1/CDH11/NPTX1/TRPV2/EDNRA/ITGA4/SEMA3G/FOXD1/BMPR1B/NOVA2/ADCY1/GLI3/LAMA2/MAP1A/FEZ1/FN1/WNT5A/PLXND1/KIF5A/NOG/ANOS1/PTK7/CDH2/CXCL12/EPHB2/NEXN/DRAXIN/PTPRS/SNAP25/UNC5A/APBB1/EFNB3/SMO/SLIT3/NUMBL/ITGB1/DVL1/CDK5R1/PAX6/WDR47/EFNA5/PLXNA3/WNT7A/KLF7/SEMA3C/MAP1B/SRF/APLP1/PALLD/NPR2/ULK1/APOE/ARHGAP4/VCL/B3GNT2/SEMA4C/CHN1/SLC9A6/ACTB/LIMK1/GDI1/ARTN/TUBB3/NOTCH2/NOTCH3/RTN4R/GLI2/BDNF/SKI…
MF	GO:0046332	SMAD binding	69	0.542748	1.75805	0.00158104	0.0344824	0.0303194	2237	tags=30%, list=17%, signal=26%	COL1A2/COL5A2/BMPR1B/FERMT2/ANKRD1/TGFB1I1/FLNA/TGFBR1/LDLRAD4/CTNNB1/PAX6/PMEPA1/RGCC/FOXH1/ACVR1/SMAD7/SKIL/SMURF1/MEF2A/HMGA2/JUN
BP	GO:0007044	cell-substrate junction assembly	76	0.538519	1.75801	0.000524821	0.0167012	0.0146849	2042	tags=32%, list=15%, signal=27%	THY1/CDH11/FN1/FERMT2/ITGA5/ITGB3/THBS1/PPM1F/EFNA5/MMP14/AJUBA/COL16A1/PIP5K1A/VCL/DAPK3/PLEC/TRIP6/STON1/ABL1/TESK2/NRP1/FMN1/PHLDB2/ACTN1
BP	GO:0030336	negative regulation of cell migration	204	0.468852	1.75606	1.44887e-05	0.00100431	0.000883064	1601	tags=20%, list=12%, signal=18%	THY1/CDH11/SULF1/DCN/ZEB2/EMILIN1/ENG/IGFBP5/ALOX15B/GNRH1/TNFAIP6/MCTP1/SERPINE1/NOG/CCL2/CXCL12/DPYSL3/ARHGDIB/EPPK1/RECK/VASH1/ADA/THBS1/CHRD/GJA1/LDLRAD4/DLL4/SRF/TPM1/RGCC/RABGEF1/WNT11/APOE/ARHGAP4/VCL/ADGRG1/PTPRG/TP53INP1/CNN2/SRGAP2/SMAD7
BP	GO:0060348	bone development	151	0.484782	1.75219	4.48127e-05	0.00239491	0.00210578	1391	tags=25%, list=10%, signal=22%	SULF1/TWIST1/LOX/BGN/ENG/FBN1/MMP13/DDR2/COL1A1/BMPR1B/EPYC/GLI3/GPR68/SCX/ADAMTS7/LRRC17/GHRL/TGM2/ITGB6/CHSY1/RUNX2/MAPK11/GJA1/INPPL1/INSIG1/PDGFC/COL27A1/FOXC1/MMP14/RFLNA/SH3PXD2B/SERPINH1/NPR2/PLS3/SLC10A7/TGFB3/IHH
BP	GO:0090596	sensory organ morphogenesis	168	0.476389	1.75163	0.00016863	0.00733278	0.00644751	973	tags=17%, list=7%, signal=16%	THY1/COL8A1/PRRX1/TWIST1/COL5A2/CTHRC1/TBX2/EDNRA/FBN1/COL5A1/GLI3/FAT3/WNT5A/LCTL/FZD2/EFEMP1/MFAP2/NOG/PTK7/ZEB1/EPHB2/MEIS1/TBX18/MFAP5/RPL38/DVL1/CTNNB1/INSIG1/PAX6
BP	GO:0048705	skeletal system morphogenesis	142	0.489989	1.74919	0.000242711	0.00918497	0.0080761	1465	tags=24%, list=11%, signal=22%	MGP/PRRX1/TWIST1/HOXB2/MMP2/MMP13/COL1A1/BMPR1B/GLI3/PDGFRA/HHIP/SCX/NOG/ZEB1/CCN2/MDFI/CHSY1/RUNX2/TGFBR1/INPPL1/CTNNB1/INSIG1/COL27A1/FOXC1/WNT7A/MMP14/RFLNA/SERPINH1/NPR2/NDST1/TGFB3/IHH/BMP1/RARA
BP	GO:0007160	cell-matrix adhesion	170	0.474938	1.74789	8.67704e-05	0.00418952	0.00368373	1893	tags=29%, list=14%, signal=25%	THY1/POSTN/CDH11/ITGBL1/FBLN5/EMILIN1/ITGA4/FN1/CDH13/CD36/FERMT2/EFEMP2/ITGA5/ITGB3/SERPINE1/ITGA11/ITGA10/NID2/CCN2/ITGB6/SNED1/THBS1/ITGB1/COL5A3/CTNNB1/PPM1F/PLAU/EFNA5/MMP14/SRF/AJUBA/COL16A1/PIP5K1A/VCL/MADCAM1/NID1/CSF1/SGCE/CDKN2A/ITGAV/DAPK3/LYPD3/TRIP6/STON1/ABL1/TESK2/NRP1/FMN1/JAG1
BP	GO:0040013	negative regulation of locomotion	238	0.459231	1.74738	7.08591e-06	0.000604981	0.000531943	1496	tags=20%, list=11%, signal=18%	THY1/CDH11/SULF1/DCN/ZEB2/EMILIN1/ENG/IGFBP5/SEMA3G/ALOX15B/GNRH1/TNFAIP6/WNT5A/MCTP1/SERPINE1/NOG/CCL2/CXCL12/DPYSL3/GHRL/ARHGDIB/EPPK1/RECK/FBLN1/VASH1/WAS/ADA/THBS1/CHRD/GJA1/LDLRAD4/DLL4/PLXNA3/SEMA3C/SRF/TPM1/RGCC/RABGEF1/WNT11/APOE/ARHGAP4/VCL/SEMA4C/ADGRG1/PTPRG/TP53INP1/CNN2
BP	GO:0060560	developmental growth involved in morphogenesis	173	0.47452	1.7461	3.09937e-05	0.00182342	0.00160328	1940	tags=28%, list=14%, signal=25%	POSTN/TRPV2/TBX2/EDNRA/ITGA4/SEMA3G/FN1/WNT5A/FGF1/SYT1/PTK7/CXCL12/PAK6/TNC/DRAXIN/PTPRS/SALL1/SLIT3/ITGB1/DVL1/CTNNB1/EFNA5/PLXNA3/SEMA3C/MAP1B/SRF/NPR2/WNT11/ULK1/APOE/ARHGAP4/VCL/SYT17/BCL11A/SEMA4C/SLC9A6/LIMK1/CSF1/GDI1/RTN4R/BDNF/NKD1/SEMA4B/IST1/ABL1/SMURF1/NRP1/FMN1/SEMA4F
BP	GO:1990138	neuron projection extension	124	0.496361	1.73908	0.000237791	0.00909405	0.00799615	1940	tags=29%, list=14%, signal=25%	POSTN/TRPV2/EDNRA/ITGA4/SEMA3G/FN1/WNT5A/SYT1/CXCL12/PAK6/DRAXIN/PTPRS/SLIT3/ITGB1/DVL1/CTNNB1/PLXNA3/SEMA3C/MAP1B/SRF/ULK1/APOE/ARHGAP4/VCL/SYT17/BCL11A/SEMA4C/SLC9A6/LIMK1/GDI1/RTN4R/SEMA4B/ABL1/SMURF1/NRP1/SEMA4F
BP	GO:0090287	regulation of cellular response to growth factor stimulus	223	0.456303	1.73394	7.36088e-06	0.000613495	0.000539429	1939	tags=24%, list=14%, signal=21%	SULF1/DCN/ADGRA2/ZEB2/EMILIN1/LOX/ENG/FBN1/CCBE1/TMEM204/FOXD1/TNFAIP6/WNT5A/HHIP/FGF1/HTRA1/ITGA5/ITGB3/NOG/FSTL1/TGFB1I1/ZEB1/SNX25/RUNX2/IL1B/THBS1/LTBP4/CHRD/NREP/LDLRAD4/CTNNB1/LTBP1/PMEPA1/CDKN2B/PEG10/GPR155/XDH/SPRED3/SPRY3/TGFB3/HIF1A/DKK3/CD109/GRB10/SMAD7/NOTCH2/SULF2/SKIL/CTDSPL2/ABL1/SMURF1/NRP1/RBPJ/NIBAN2
BP	GO:0048008	platelet-derived growth factor receptor signaling pathway	48	0.566183	1.73014	0.00239745	0.0447588	0.0393552	1881	tags=31%, list=14%, signal=27%	PDGFRB/LOX/PLAT/PDGFRA/CSPG4/ITGB3/PDGFRL/PDGFB/PDGFC/CBL/F3/SGPL1/STON1/ABL1/NRP1
BP	GO:0090288	negative regulation of cellular response to growth factor stimulus	68	0.532343	1.72659	0.00122176	0.0290936	0.0255812	1939	tags=31%, list=14%, signal=27%	SULF1/DCN/ADGRA2/EMILIN1/FBN1/TNFAIP6/WNT5A/HTRA1/NOG/THBS1/CHRD/GPR155/XDH/SPRY3/SMAD7/SULF2/SKIL/CTDSPL2/ABL1/SMURF1/NIBAN2
BP	GO:0061138	morphogenesis of a branching epithelium	127	0.489694	1.72586	0.000312253	0.0111528	0.0098064	1134	tags=23%, list=8%, signal=21%	SULF1/ENG/TBX2/EDNRA/FOXD1/GLI3/IL10/LEF1/WNT5A/HHIP/TMEM59L/PLXND1/FGF1/NOG/COL4A1/TP63/SNAI2/NKX3-1/TGM2/HS3ST3B1/TNC/SALL1/SMO/CTNNB1/DLL4/MMP14/SOCS3/SEMA3C/SRF
BP	GO:0042733	embryonic digit morphogenesis	48	0.56347	1.72185	0.00263521	0.047261	0.0415553	1739	tags=25%, list=13%, signal=22%	TWIST1/TBX2/GLI3/WNT5A/NOG/SALL1/CTNNB1/WNT7A/IHH/TMEM231/FZD6/OSR1
CC	GO:0042383	sarcolemma	93	0.509779	1.72127	0.00103543	0.025908	0.0227802	1665	tags=27%, list=12%, signal=24%	COL6A3/BGN/COL6A2/DYSF/SGCA/LAMA2/SLC2A5/ANXA8L1/CACNB2/POPDC3/SYNC/FLNC/CDH2/CACNB1/KCND3/ITGB1/SYNM/COL6A1/CAVIN4/VCL/TGFB3/SLC2A1/STBD1/SGCE/PLEC
CC	GO:0000779	condensed chromosome, centromeric region	162	0.470345	1.72024	0.000110223	0.00507677	0.00446387	2144	tags=20%, list=16%, signal=17%	CENPA/HJURP/NUF2/PLK1/NEK2/NDC80/NCAPG/CENPF/AURKB/SPAG5/KIF2C/BUB1/DYNC1I1/BIRC5/ERCC6L/CENPO/SPC24/SGO2/CENPQ/GPATCH11/CENPI/CEBPB/ACTB/CENPB/DCTN4/TTK/SPDL1/CCNB1/CENPE/SKA2/CBX5/FBXW11/SMARCD1
BP	GO:0007507	heart development	428	0.425709	1.71929	1.41027e-07	2.19406e-05	1.92918e-05	2194	tags=25%, list=16%, signal=22%	HSPB7/CDH11/PDGFRB/TWIST1/HOPX/EMILIN1/LOX/ENG/TBX2/EDNRA/FBN1/MMP2/COL5A1/GLI3/GLI1/PDGFRA/FN1/WNT5A/PLXND1/FZD2/SCX/INHBA/ANKRD1/NOG/POPDC3/PTK7/FZD7/NOX4/ALPK3/SNAI2/NKX3-1/MEIS1/FLNA/ADAMTS6/TBX6/SALL1/CPE/SNAI1/TGFBR1/SMO/TBX18/SLIT3/ITGB1/PDGFB/MAPK11/BASP1/GJA1/DVL1/PDLIM4/VANGL2/CTNNB1/FHOD3/ELN/GYS1/DLL4/FOXC1/RPS6KA2/NFATC1/HEG1/AP2B1/SEMA3C/SRF/SH3PXD2B/PDLIM3/TPM1/FOXH1/NDST1/WNT11/BB…
BP	GO:0007369	gastrulation	144	0.47932	1.71563	0.000212359	0.00844731	0.00742749	1260	tags=24%, list=9%, signal=22%	COL8A1/COL5A2/ITGA4/MMP2/COL5A1/IL10/LEF1/FN1/WNT5A/ITGA5/ITGB3/SCX/INHBA/NOG/COL7A1/FZD7/COL4A2/COL12A1/TBX6/MYADM/SNAI1/WNT5B/ITGB1/PHLDB1/GJA1/COL6A1/DVL1/EYA2/CTNNB1/SOX2/FOXC1/MMP14/SRF/UGDH/WNT11
BP	GO:1905818	regulation of chromosome separation	68	0.528899	1.71542	0.00139769	0.0319778	0.0281172	1774	tags=25%, list=13%, signal=22%	NUF2/PLK1/NDC80/NCAPG/CENPF/AURKB/BUB1/UBE2C/BIRC5/SPC24/DLGAP5/NCAPG2/NCAPH/TTK/CHFR/SPDL1/CCNB1
BP	GO:0072006	nephron development	103	0.50396	1.71528	0.000756817	0.0219854	0.0193311	1893	tags=29%, list=14%, signal=25%	SULF1/PDGFRB/EDNRA/FOXD1/GLI3/PDGFRA/TMEM59L/FGF1/ITGB3/NOG/HS3ST3B1/SALL1/EGR1/SMO/PDGFB/BASP1/CTNNB1/FOXC1/COL4A3/PODXL/WNT11/NID1/COL4A4/NOTCH2/NOTCH3/GREB1L/OSR1/SULF2/FMN1/JAG1
BP	GO:0051783	regulation of nuclear division	118	0.491417	1.71432	0.000591682	0.0184351	0.0162095	1211	tags=21%, list=9%, signal=19%	PDGFRB/DMRT1/CCDC8/NUF2/PLK1/MKI67/NEK2/WNT5A/NDC80/CENPF/AURKB/BUB1/CDCA2/UBE2C/BIRC5/IL1B/PDGFB/SPHK1/RPS6KA2/PDE3A/SPC24/FZR1/DLGAP5/NPR2/RGCC
BP	GO:0002062	chondrocyte differentiation	88	0.511148	1.71272	0.000872939	0.023814	0.020939	1768	tags=35%, list=13%, signal=31%	SULF1/BMPR1B/GLI3/EFEMP1/SCX/ADAMTS7/LOXL2/SNAI2/CCN2/TGFBI/SLC26A2/CHSY1/RUNX2/TGFBR1/WNT5B/CTNNB1/COL27A1/WNT7A/RFLNA/SERPINH1/NPR2/MBOAT2/IHH/HIF1A/MEX3C/MAF/SMAD7/OSR1/SULF2/FOSL2/SLC39A14
BP	GO:0001503	ossification	297	0.436285	1.71212	2.95693e-06	0.00029157	0.00025637	1513	tags=20%, list=11%, signal=18%	MGP/CDH11/COL1A2/TWIST1/SRGN/LOX/COL5A2/IGFBP5/CTHRC1/MMP2/TNFAIP6/MMP13/DDR2/CTSK/COL1A1/BMPR1B/GLI3/GLI1/LEF1/WNT5A/FERMT2/SCX/ADAMTS7/NOG/TP63/ITGA11/SNAI2/MRC2/TPH1/TNC/CCN2/CCR1/SLC26A2/SNAI1/CHSY1/RUNX2/SMO/CHRD/MAPK11/RPL38/COL6A1/INPPL1/CTNNB1/SOX2/FOXC1/TPM4/JUNB/MMP14/RFLNA/NPR2/FASN/WNT11/MN1/IHH/ACVR1/HIF1A/CEBPB/BMP1/BMP8B/CSF1
BP	GO:0030282	bone mineralization	80	0.517529	1.71178	0.00203643	0.0406185	0.0357147	119	tags=10%, list=1%, signal=10%	MGP/COL1A2/TWIST1/SRGN/LOX/MMP13/DDR2/BMPR1B
BP	GO:0048592	eye morphogenesis	112	0.494158	1.7092	0.000424902	0.0141654	0.0124553	539	tags=14%, list=4%, signal=14%	THY1/COL8A1/TWIST1/COL5A2/TBX2/FBN1/COL5A1/GLI3/FAT3/WNT5A/LCTL/EFEMP1/MFAP2/ZEB1/EPHB2/MEIS1
BP	GO:0001763	morphogenesis of a branching structure	134	0.48047	1.70774	0.000346244	0.01206	0.010604	1701	tags=27%, list=13%, signal=24%	SULF1/ENG/TBX2/EDNRA/FOXD1/GLI3/IL10/LEF1/WNT5A/HHIP/TMEM59L/PLXND1/FGF1/NOG/COL4A1/TP63/SNAI2/NKX3-1/TGM2/HS3ST3B1/TNC/SALL1/SMO/CTNNB1/DLL4/MMP14/SOCS3/SEMA3C/SRF/IHH/ACVR1/BCL11A/CSF1/CELSR1/GREB1L/GLI2
MF	GO:0042826	histone deacetylase binding	94	0.505456	1.70624	0.00100068	0.0254945	0.0224167	2839	tags=31%, list=21%, signal=25%	TWIST1/TBX2/GLI3/LEF1/DACT1/ANKRD1/NKX3-1/HIC1/BCL3/JDP2/SRF/CRY1/HIF1A/CEBPB/RARA/MEF2A/CBX5/MTA2/SMG5/NACC2/NCOR2/RBBP4/NACC1/TRAF6/MIER2/BHLHE41/HDAC4/MECP2/SUDS3
BP	GO:0001935	endothelial cell proliferation	112	0.491379	1.69959	0.000475788	0.0154212	0.0135595	1307	tags=27%, list=10%, signal=24%	SULF1/COL8A1/SPARC/ZEB2/ITGA4/VSTM4/IL10/WNT5A/CDH13/ITGB3/SCG2/LOXL2/CCL2/CXCL12/GHRL/CCR3/VASH1/TNFSF12/TGFBR1/THBS1/PDGFB/PLCG1/PIK3CD/DLL4/COL4A3/MMP14/RGCC/APOE/F3/XDH
BP	GO:0010717	regulation of epithelial to mesenchymal transition	77	0.519912	1.69319	0.00246893	0.0454869	0.0399954	1601	tags=29%, list=12%, signal=25%	TWIST1/ENG/COL1A1/LEF1/FERMT2/GLIPR2/NOG/LOXL2/TGFB1I1/SNAI1/TGFBR1/IL1B/PHLDB1/LDLRAD4/CTNNB1/FOXC1/RGCC/SPRED3/TGFB3/ACVR1/TGFB2/SMAD7
BP	GO:1904035	regulation of epithelial cell apoptotic process	70	0.522289	1.69315	0.00212922	0.0416388	0.0366119	1260	tags=21%, list=9%, signal=20%	CD248/ITGA4/ITGB3/CD40/SERPINE1/SCG2/CCL2/ICAM1/ANGPTL4/THBS1/PLCG1/NPC1/CARM1/RGCC/WNT11
CC	GO:0031256	leading edge membrane	120	0.483683	1.68989	0.000590373	0.0184351	0.0162095	1610	tags=22%, list=12%, signal=19%	THY1/FAP/LCP1/CSPG4/PLXND1/FERMT2/ITGA5/ITGB3/ANTXR1/KCNC1/UNC5A/ITGB1/DOCK8/KSR1/ARHGAP45/PLCG1/PLEKHO1/PIEZO1/PDE4A/KCNC3/TPM1/PIP5K1A/PSD/GABRE/SGCE/ITGAV
BP	GO:0150115	cell-substrate junction organization	83	0.506746	1.68248	0.00159224	0.034507	0.0303411	2042	tags=29%, list=15%, signal=25%	THY1/CDH11/FN1/FERMT2/ITGA5/ITGB3/THBS1/PPM1F/EFNA5/MMP14/AJUBA/COL16A1/PIP5K1A/VCL/DAPK3/PLEC/TRIP6/STON1/ABL1/TESK2/NRP1/FMN1/PHLDB2/ACTN1
BP	GO:0048588	developmental cell growth	160	0.458364	1.67952	0.000343485	0.0120237	0.0105721	2053	tags=28%, list=15%, signal=24%	POSTN/TRPV2/EDNRA/ITGA4/SEMA3G/FN1/WNT5A/SYT1/CXCL12/PAK6/MEIS1/DRAXIN/PTPRS/SLIT3/ITGB1/DVL1/CTNNB1/EFNA5/PLXNA3/SEMA3C/MAP1B/SRF/NPR2/ULK1/APOE/ARHGAP4/VCL/SYT17/BCL11A/SEMA4C/SLC9A6/LIMK1/MEX3C/GDI1/SMAD7/RTN4R/BDNF/SEMA4B/IST1/ABL1/SMURF1/NRP1/SEMA4F/FOXP1/CRABP2
BP	GO:0048675	axon extension	89	0.495789	1.66659	0.00147054	0.0329369	0.0289605	1940	tags=33%, list=14%, signal=28%	TRPV2/EDNRA/SEMA3G/FN1/WNT5A/CXCL12/DRAXIN/PTPRS/SLIT3/ITGB1/DVL1/PLXNA3/SEMA3C/MAP1B/SRF/ULK1/APOE/ARHGAP4/VCL/SEMA4C/SLC9A6/LIMK1/GDI1/RTN4R/SEMA4B/ABL1/SMURF1/NRP1/SEMA4F
BP	GO:0007411	axon guidance	141	0.466097	1.66592	0.000646472	0.0195084	0.0171532	2046	tags=35%, list=15%, signal=30%	EDNRA/SEMA3G/FOXD1/BMPR1B/NOVA2/GLI3/LAMA2/FEZ1/WNT5A/PLXND1/KIF5A/NOG/ANOS1/PTK7/CXCL12/EPHB2/NEXN/DRAXIN/UNC5A/EFNB3/SMO/SLIT3/DVL1/CDK5R1/PAX6/EFNA5/PLXNA3/KLF7/SEMA3C/PALLD/B3GNT2/SEMA4C/CHN1/ARTN/TUBB3/NOTCH2/NOTCH3/GLI2/BDNF/SEMA4B/ENAH/YTHDF1/NRP1/NIBAN2/SEMA4F/PLXNB1/ECE1/TRIO/IGSF9
BP	GO:0097485	neuron projection guidance	141	0.466097	1.66592	0.000646472	0.0195084	0.0171532	2046	tags=35%, list=15%, signal=30%	EDNRA/SEMA3G/FOXD1/BMPR1B/NOVA2/GLI3/LAMA2/FEZ1/WNT5A/PLXND1/KIF5A/NOG/ANOS1/PTK7/CXCL12/EPHB2/NEXN/DRAXIN/UNC5A/EFNB3/SMO/SLIT3/DVL1/CDK5R1/PAX6/EFNA5/PLXNA3/KLF7/SEMA3C/PALLD/B3GNT2/SEMA4C/CHN1/ARTN/TUBB3/NOTCH2/NOTCH3/GLI2/BDNF/SEMA4B/ENAH/YTHDF1/NRP1/NIBAN2/SEMA4F/PLXNB1/ECE1/TRIO/IGSF9
BP	GO:0042471	ear morphogenesis	68	0.510701	1.6564	0.00269131	0.0477423	0.0419785	968	tags=22%, list=7%, signal=21%	PRRX1/TWIST1/CTHRC1/TBX2/EDNRA/WNT5A/FZD2/NOG/PTK7/ZEB1/EPHB2/TBX18/RPL38/DVL1/INSIG1
BP	GO:0061351	neural precursor cell proliferation	107	0.481621	1.65116	0.00194255	0.0394741	0.0347085	2186	tags=35%, list=16%, signal=29%	ASPM/GLI3/WDR62/GLI1/LEF1/WNT5A/HHIP/LIMS2/BBS1/RASSF10/CDH2/KIF14/FLNA/SMO/NUMBL/ITGB1/AKNA/CTNNB1/TOX/DLL4/PAX6/WDR47/EML1/WNT7A/HAPLN3/HIF1A/ADGRG1/ARTN/DIXDC1/FZD6/KDM2B/SHOC2/MELK/TEAD3/KDM1A/FGF2/SMARCD3
BP	GO:0048812	neuron projection morphogenesis	419	0.410934	1.6506	1.33233e-06	0.000158095	0.000139009	2071	tags=26%, list=15%, signal=22%	THY1/POSTN/CDH11/NPTX1/TRPV2/EDNRA/ITGA4/SEMA3G/FOXD1/BMPR1B/NOVA2/ADCY1/GLI3/LAMA2/NYAP2/MAP1A/FEZ1/FN1/WNT5A/PLXND1/SYT1/KIF5A/NTF4/NOG/ANOS1/ZNF365/PTK7/CDH2/CXCL12/PAK6/EPHB2/NEXN/GAS7/DRAXIN/PTPRS/SNAP25/UNC5A/APBB1/EFNB3/TANC2/SMO/SLIT3/NUMBL/ITGB1/DVL1/CTNNB1/CDK5R1/PAX6/WDR47/EFNA5/PLXNA3/DLG4/WNT7A/KLF7/SEMA3C/MAP1B/SRF/APLP1/PALLD/NPR2/ULK1/APOE/ARHGAP4/SPRY3/VCL/SYT17/B3GNT2/BCL11A/SEM…
CC	GO:0043202	lysosomal lumen	76	0.505237	1.64936	0.00267484	0.0476502	0.0418975	342	tags=11%, list=3%, signal=10%	DCN/PDGFRB/BGN/CTSK/LUM/FMOD/CSPG4/CSPG5
BP	GO:0031099	regeneration	142	0.461792	1.64853	0.00100143	0.0254945	0.0224167	2028	tags=27%, list=15%, signal=23%	THY1/POSTN/PRRX1/HOPX/MMP2/LCP1/SGCA/IL10/GLI1/NNMT/CSPG5/FZD7/CXCL12/SLC7A5/TNC/FLNA/PTPRS/EPPK1/NREP/AXL/SOX2/WNT7A/MAP1B/GPX1/ULK1/IHH/CEBPB/PTPRU/RTN4R/UPF2/SULF2/LPIN1/FKRP/MAPK8IP3/RUNX1/GAS6/CDK1/CDKN1A
BP	GO:0001667	ameboidal-type cell migration	341	0.414502	1.64776	7.29219e-06	0.000613495	0.000539429	1490	tags=21%, list=11%, signal=19%	DCN/ADGRA2/SPARC/CD248/TWIST1/FAP/ZEB2/EDNRA/SYDE1/ITGA4/SEMA3G/CCBE1/DDR2/VSTM4/FN1/WNT5A/PLXND1/CDH13/FGF1/TNS1/ITGB3/GLIPR2/CD40/SCG2/DAAM2/FSTL1/LOXL2/NRTN/CDH2/ANLN/SNAI2/ARHGDIB/EPPK1/SNAI1/VASH1/TNFSF12/TGFBR1/SMO/THBS1/ITGB1/PDGFB/CLN3/PLCG1/PIK3CD/GJA1/PPM1F/DLL4/PAX6/SRPX2/WNT7A/ZC3H12A/SEMA3C/SRF/GPX1/S100A2/KANK2/RGCC/WNT11/PIP5K1A/APOE/ARHGAP4/SASH1/HSPB1/CORO1A/ACVR1/SEMA4C/HIF1A/PT…
MF	GO:0001217	DNA-binding transcription repressor activity	241	0.431206	1.646	3.8967e-05	0.00215599	0.0018957	2693	tags=32%, list=20%, signal=26%	AEBP1/PRRX1/TWIST1/ZEB2/TBX2/LEF1/FOXS1/E2F7/DMBX1/ZGPAT/ZNF491/SNAI2/ZEB1/ZBED6/HIC1/ZNF550/SALL1/SNAI1/NR2F1/TBX18/ZNF337/ZBTB34/ZNF20/JDP2/ZNF93/ZNF554/ZNF343/PAX6/MAFK/ZNF418/POU6F1/ELK3/ZNF140/ZNF133/BCL11A/ZNF175/HIF1A/CEBPB/CUX2/RARA/ZNF764/CC2D1B/ZNF749/ZNF674/BHLHE40/ZNF559/ZBTB39/ZNF25/ZNF69/SKIL/ZNF79/ZNF266/ZBTB8A/ZNF134/HES2/FOXP1/SREBF2/ZNF169/ZNF281/ZNF778/E4F1/ZBED2/ZNF439/JUN/NAC…
BP	GO:0120039	plasma membrane bounded cell projection morphogenesis	432	0.407924	1.64555	1.44062e-06	0.00016081	0.000141396	2071	tags=25%, list=15%, signal=22%	THY1/POSTN/CDH11/NPTX1/TRPV2/EDNRA/ITGA4/SEMA3G/FOXD1/BMPR1B/NOVA2/ADCY1/GLI3/LAMA2/NYAP2/MAP1A/FEZ1/FN1/WNT5A/PLXND1/SYT1/KIF5A/NTF4/NOG/ANOS1/ZNF365/PTK7/CDH2/CXCL12/PAK6/EPHB2/NEXN/GAS7/DRAXIN/PTPRS/SNAP25/UNC5A/APBB1/EFNB3/TANC2/SMO/SLIT3/NUMBL/ITGB1/PLEKHO1/DVL1/CTNNB1/CDK5R1/PAX6/WDR47/EFNA5/PLXNA3/DLG4/WNT7A/KLF7/SEMA3C/MAP1B/SRF/APLP1/PALLD/NPR2/ULK1/APOE/ARHGAP4/SPRY3/VCL/SYT17/B3GNT2/BC…
BP	GO:0150063	visual system development	261	0.424807	1.6441	2.97107e-05	0.00180874	0.00159037	2640	tags=30%, list=20%, signal=25%	THY1/COL8A1/PDGFRB/TWIST1/PXDN/COL5A2/TBX2/MEIS3/FBN1/COL5A1/BMPR1B/GLI3/VSTM4/PDGFRA/FAT3/WNT5A/LCTL/EFEMP1/MFAP2/BIRC7/INHBA/COL4A1/ZEB1/EPHB2/MEIS1/TGFBR1/WNT5B/MFAP5/C3/CTNNB1/DLL4/PAX6/SOX2/FOXC1/WNT7A/FZR1/SRF/SH3PXD2B/HSF4/SPRED3/IHH/LIMK2/HIF1A/RARA/TGFB2/MAF/NOTCH2/TMEM231/ZNF513/NKD1/SKIL/KDM2B/PDE6B/NRP1/JAG1/PBX3/C12orf57/VIM/CLIC4/PPP1R13L/FGF2/SMARCD3/RPE65/ATP8A2/TBC1D20/NPHP1/RCN1…
BP	GO:0048667	cell morphogenesis involved in neuron differentiation	377	0.410066	1.64401	4.81051e-06	0.000441828	0.000388487	2071	tags=26%, list=15%, signal=23%	THY1/CDH11/NPTX1/TRPV2/EDNRA/ITGA4/SEMA3G/FOXD1/BMPR1B/SLC1A3/NOVA2/ADCY1/GLI3/LAMA2/MAP1A/FEZ1/FN1/WNT5A/PLXND1/KIF5A/BBS1/NOG/ANOS1/ZNF365/PTK7/CDH2/CXCL12/EPHB2/NEXN/DRAXIN/PTPRS/SNAP25/UNC5A/APBB1/EFNB3/TANC2/SMO/SLIT3/NUMBL/ITGB1/DVL1/CDK5R1/PAX6/WDR47/EFNA5/PLXNA3/DLG4/WNT7A/KLF7/SEMA3C/MAP1B/SRF/APLP1/PALLD/NPR2/ULK1/APOE/ARHGAP4/VCL/B3GNT2/PDZD7/SEMA4C/CUX2/CHN1/SLC9A6/ACTB/LIMK1/GDI1/ART…
BP	GO:0048880	sensory system development	262	0.424565	1.64342	5.4155e-05	0.00285067	0.00250652	2640	tags=30%, list=20%, signal=24%	THY1/COL8A1/PDGFRB/TWIST1/PXDN/COL5A2/TBX2/MEIS3/FBN1/COL5A1/BMPR1B/GLI3/VSTM4/PDGFRA/FAT3/WNT5A/LCTL/EFEMP1/MFAP2/BIRC7/INHBA/COL4A1/ZEB1/EPHB2/MEIS1/TGFBR1/WNT5B/MFAP5/C3/CTNNB1/DLL4/PAX6/SOX2/FOXC1/WNT7A/FZR1/SRF/SH3PXD2B/HSF4/SPRED3/IHH/LIMK2/HIF1A/RARA/TGFB2/MAF/NOTCH2/TMEM231/ZNF513/NKD1/SKIL/KDM2B/PDE6B/NRP1/JAG1/PBX3/C12orf57/VIM/CLIC4/PPP1R13L/FGF2/SMARCD3/RPE65/ATP8A2/TBC1D20/NPHP1/RCN1…
BP	GO:0032990	cell part morphogenesis	456	0.403485	1.63969	1.02553e-06	0.000125961	0.000110754	2071	tags=25%, list=15%, signal=22%	THY1/POSTN/CDH11/NPTX1/TRPV2/EDNRA/ITGA4/SEMA3G/FOXD1/BMPR1B/NOVA2/ADCY1/GLI3/LAMA2/NYAP2/MAP1A/FEZ1/FN1/WNT5A/PLXND1/SYT1/KIF5A/NTF4/CSPG5/NOG/ANOS1/ZNF365/PTK7/CDH2/CXCL12/PAK6/EPHB2/NEXN/GAS7/DRAXIN/PTPRS/SNAP25/UNC5A/APBB1/EFNB3/TANC2/SMO/SLIT3/NUMBL/ITGB1/PLEKHO1/DVL1/SLIRP/CTNNB1/CDK5R1/PAX6/WDR47/EFNA5/PLXNA3/DLG4/WNT7A/PID1/KLF7/SEMA3C/MAP1B/SRF/APLP1/PALLD/NPR2/ULK1/APOE/ARHGAP4/SPRY3/VC…
BP	GO:0048858	cell projection morphogenesis	437	0.404663	1.63751	1.44708e-06	0.00016081	0.000141396	2071	tags=25%, list=15%, signal=22%	THY1/POSTN/CDH11/NPTX1/TRPV2/EDNRA/ITGA4/SEMA3G/FOXD1/BMPR1B/NOVA2/ADCY1/GLI3/LAMA2/NYAP2/MAP1A/FEZ1/FN1/WNT5A/PLXND1/SYT1/KIF5A/NTF4/CSPG5/NOG/ANOS1/ZNF365/PTK7/CDH2/CXCL12/PAK6/EPHB2/NEXN/GAS7/DRAXIN/PTPRS/SNAP25/UNC5A/APBB1/EFNB3/TANC2/SMO/SLIT3/NUMBL/ITGB1/PLEKHO1/DVL1/CTNNB1/CDK5R1/PAX6/WDR47/EFNA5/PLXNA3/DLG4/WNT7A/KLF7/SEMA3C/MAP1B/SRF/APLP1/PALLD/NPR2/ULK1/APOE/ARHGAP4/SPRY3/VCL/SYT17/B3G…
BP	GO:0001654	eye development	259	0.423666	1.63719	6.56373e-05	0.00321194	0.00282417	2640	tags=30%, list=20%, signal=24%	THY1/COL8A1/PDGFRB/TWIST1/PXDN/COL5A2/TBX2/MEIS3/FBN1/COL5A1/BMPR1B/GLI3/VSTM4/PDGFRA/FAT3/WNT5A/LCTL/EFEMP1/MFAP2/BIRC7/INHBA/COL4A1/ZEB1/EPHB2/MEIS1/TGFBR1/WNT5B/MFAP5/CTNNB1/DLL4/PAX6/SOX2/FOXC1/WNT7A/FZR1/SRF/SH3PXD2B/HSF4/SPRED3/IHH/LIMK2/HIF1A/RARA/TGFB2/MAF/NOTCH2/TMEM231/ZNF513/NKD1/SKIL/KDM2B/PDE6B/NRP1/JAG1/PBX3/C12orf57/VIM/CLIC4/PPP1R13L/FGF2/SMARCD3/RPE65/ATP8A2/TBC1D20/NPHP1/RCN1/ND…
BP	GO:0051897	positive regulation of phosphatidylinositol 3-kinase/protein kinase B signal transduction	103	0.480856	1.63664	0.00189362	0.0387638	0.034084	1469	tags=25%, list=11%, signal=23%	DCN/PDGFRB/ENG/IGFBP5/MEIS3/DDR2/CHI3L1/PDGFRA/FN1/FERMT2/LTK/NOX4/NKX3-1/C1QTNF1/TGFBR1/THBS1/ITGB1/PDGFB/PIK3CD/AXL/PDGFC/GPX1/CBL/F3/MC1R/TGFB2
BP	GO:0055001	muscle cell development	115	0.4702	1.63373	0.00164006	0.0350062	0.03078	2461	tags=31%, list=18%, signal=26%	PDGFRB/MYL9/LOX/ENG/EDNRA/PDGFRA/EFEMP2/ANKRD1/TNNT1/FLNC/ALPK3/MEIS1/TMOD4/SMO/TBX18/ITGB1/FHOD3/TMOD2/SRF/GPX1/TPM1/CACNB4/PLEC/UCHL1/NIBAN2/MEF2A/CDK1/FOXP1/ACTN1/FHL2/KDM1A/SGCB/SMYD3/SELENON/ADM/AFG3L2
CC	GO:0098978	glutamatergic synapse	266	0.420521	1.63285	6.27317e-05	0.0031825	0.00279828	2071	tags=24%, list=15%, signal=21%	SPARCL1/CDH11/NPTX1/SRGN/PLAT/ADCY1/WNT5A/ARHGAP22/PLXND1/SYT1/ITGA5/ITGB3/TAMALIN/CSPG5/NPTXR/SLC4A8/CPT1C/EPHB2/GHRL/FLNA/PTPRS/SNAP25/VGF/DRD1/EFNB3/ITGB1/PLCG1/DVL1/CTNNB1/CDH6/GRIP2/DLG4/WNT7A/ABLIM3/AP2B1/LRFN4/GPC6/STK38L/APOE/GPC4/CORO1A/CACNB4/ACTB/LPAR1/SPTB/HOMER3/RTN4R/SHANK2/PORCN/SEMA4B/CTNND1/RNF19A/NRP1/SPTBN2/ADGRL3/FBXO2/SEMA4F/LRRC4C/ERC2/STK38/KLHL17/ITPKA/TRIO/ACTN1/YWHAH
MF	GO:0005539	glycosaminoglycan binding	147	0.454637	1.62782	0.000896746	0.0240541	0.0211501	839	tags=24%, list=6%, signal=23%	POSTN/SULF1/DCN/THBS2/BGN/ENG/FBN1/TNFAIP6/COL5A1/EPYC/CRISPLD2/PCOLCE/LTBP2/FN1/CCDC80/FGF1/LAYN/EFEMP2/ANOS1/FSTL1/CEL/NAV2/DPYSL3/HMMR/CCN2/ADAMTS15/PF4V1/PTPRS/GPNMB/PCOLCE2/EVA1C/SLIT3/THBS1/LTBP4/COL5A3
BP	GO:0002009	morphogenesis of an epithelium	370	0.40644	1.6239	1.7951e-05	0.00120841	0.00106252	2001	tags=24%, list=15%, signal=21%	SULF1/TWIST1/ENG/IGFBP5/CTHRC1/TBX2/EDNRA/HOXB2/MMP2/FOXD1/COL5A1/GLI3/IL10/LEF1/DACT1/WNT5A/HHIP/TMEM59L/PLXND1/FGF1/FZD2/FERMT2/ITGA5/NOG/PTK7/FZD7/COL4A1/TP63/SNAI2/TGFB1I1/NKX3-1/TGM2/HS3ST3B1/TNC/FLNA/TBX6/SALL1/RIPK4/SNAI1/SMO/TBX18/WNT5B/KRT17/ITGB1/PIK3CD/GJA1/DVL1/VANGL2/CTNNB1/DLL4/WNT7A/MMP14/SOCS3/SEMA3C/MSN/SRF/PODXL/FOXH1/AJUBA/WNT11/BBS5/VCL/IHH/ACVR1/SEMA4C/HIF1A/ACTB/RARA/TGFB2/C…
BP	GO:0002040	sprouting angiogenesis	88	0.484394	1.62308	0.002711	0.0478752	0.0420954	1134	tags=20%, list=8%, signal=19%	ADGRA2/CCBE1/VSTM4/IL10/LEF1/CDH13/FGF1/E2F7/ITGA5/LOXL2/KLF2/GHRL/RECK/THBS1/ITGB1/DLL4/SRPX2/SRF
BP	GO:0007423	sensory organ development	353	0.406133	1.62155	2.66354e-05	0.00165022	0.00145099	2015	tags=23%, list=15%, signal=20%	THY1/COL8A1/PDGFRB/PRRX1/TWIST1/PXDN/COL5A2/CTHRC1/TBX2/EDNRA/MEIS3/FBN1/COL5A1/BMPR1B/GLI3/VSTM4/LEF1/PDGFRA/FAT3/WNT5A/LCTL/FZD2/EFEMP1/MFAP2/NTF4/BIRC7/INHBA/NOG/PTK7/COL4A1/ZEB1/EPHB2/MEIS1/TGFBR1/TBX18/WNT5B/MFAP5/RPL38/DVL1/CTNNB1/GSDME/MCM2/INSIG1/DLL4/PAX6/SOX2/FOXC1/WNT7A/FZR1/SRF/SH3PXD2B/LRIG3/HSF4/SPRED3/SLC4A7/TGFB3/IHH/LIMK2/PDZD7/HIF1A/RARA/TGFB2/MAF/NOTCH2/TMEM231/ZNF513/FZD6/OSR1…
BP	GO:0043491	phosphatidylinositol 3-kinase/protein kinase B signal transduction	184	0.434787	1.62137	0.000407036	0.0137665	0.0121045	1469	tags=19%, list=11%, signal=17%	DCN/PDGFRB/TWIST1/LOX/ENG/IGFBP5/MEIS3/RCN3/DDR2/NYAP2/CHI3L1/PDGFRA/FN1/FERMT2/CD40/LTK/NOX4/NKX3-1/PEAR1/C1QTNF1/TGFBR1/THBS1/ITGB1/PDGFB/PIK3CD/AXL/PDGFC/GPX1/CBL/TYRO3/F3/XDH/ATG14/MC1R/TGFB2
BP	GO:0090092	regulation of transmembrane receptor protein serine/threonine kinase signaling pathway	188	0.433749	1.61737	0.000254092	0.00946222	0.00831987	1844	tags=21%, list=14%, signal=19%	SULF1/ZEB2/EMILIN1/LOX/ENG/FBN1/DMRT1/FOXD1/TNFAIP6/WNT5A/HTRA1/INHBA/NOG/FSTL1/TGFB1I1/ZEB1/SNX25/TGFBR1/THBS1/LTBP4/CHRD/NREP/LDLRAD4/LTBP1/PMEPA1/CDKN2B/PEG10/GPR155/SPRED3/TGFB3/ACVR1/DKK3/CD109/SMAD7/NOTCH2/AMH/SKIL/CTDSPL2/ABL1/SMURF1
BP	GO:0043010	camera-type eye development	223	0.425253	1.61595	0.000117576	0.00532249	0.00467992	2671	tags=30%, list=20%, signal=25%	THY1/COL8A1/PDGFRB/TWIST1/TBX2/FBN1/BMPR1B/GLI3/VSTM4/PDGFRA/FAT3/WNT5A/LCTL/EFEMP1/BIRC7/INHBA/COL4A1/ZEB1/EPHB2/MEIS1/TGFBR1/WNT5B/CTNNB1/DLL4/PAX6/FOXC1/WNT7A/FZR1/SRF/HSF4/SPRED3/IHH/LIMK2/HIF1A/RARA/TGFB2/MAF/NOTCH2/TMEM231/ZNF513/SKIL/KDM2B/PDE6B/NRP1/JAG1/C12orf57/VIM/CLIC4/PPP1R13L/FGF2/SMARCD3/RPE65/ATP8A2/TBC1D20/NPHP1/RCN1/NDP/BCAR3/NES/SPRED2/GDF11/TWSG1/MFSD2A/PYGO2/VEGFA/SIX5/NF2
BP	GO:1902850	microtubule cytoskeleton organization involved in mitosis	145	0.448053	1.60783	0.00093582	0.0246303	0.0216568	3063	tags=27%, list=23%, signal=21%	CENPA/NUF2/PLK1/WDR62/NEK2/NDC80/AURKB/KIF23/FLNA/BIRC5/PRC1/SUN2/ITGB1/GJA1/PAX6/EML1/TACC3/DLGAP5/GPSM1/TTK/SPDL1/CCNB1/CENPE/CDK1/FBXW11/KIF11/TUBG2/STAG1/KIFC2/GOLGA2/MAPRE1/PTPA/DCTN1/MECP2/BORA/PLK3/EFHC1/CHMP7/NEK6
BP	GO:0060070	canonical Wnt signaling pathway	240	0.421651	1.60688	0.000171606	0.00741615	0.00652082	1917	tags=20%, list=14%, signal=18%	ADGRA2/ZEB2/CTHRC1/EDNRA/FOXD1/COL1A1/ASPM/GLI3/GLI1/LEF1/DACT1/WNT5A/FZD2/NOG/DAAM2/PTK7/FZD7/CDH2/GPRC5B/SNAI2/DRAXIN/RECK/FZD8/EGR1/TBX18/WNT5B/DVL1/CTNNB1/PYGO1/TLE3/SOX2/WNT7A/WNT11/CDH3/APOE/BICC1/NID1/DKK3/DIXDC1/DAPK3/WLS/PTPRU/FZD6/SULF2/NKD1/CAPRIN2/CTNND1/BMAL1/RBPJ
BP	GO:0051896	regulation of phosphatidylinositol 3-kinase/protein kinase B signal transduction	149	0.445986	1.60252	0.00151408	0.0336511	0.0295885	1469	tags=19%, list=11%, signal=18%	DCN/PDGFRB/TWIST1/ENG/IGFBP5/MEIS3/RCN3/DDR2/CHI3L1/PDGFRA/FN1/FERMT2/LTK/NOX4/NKX3-1/C1QTNF1/TGFBR1/THBS1/ITGB1/PDGFB/PIK3CD/AXL/PDGFC/GPX1/CBL/F3/XDH/MC1R/TGFB2
MF	GO:0005509	calcium ion binding	398	0.39832	1.59958	9.64233e-06	0.00073376	0.000645176	1947	tags=29%, list=14%, signal=25%	MGP/SPARCL1/CDH11/SULF1/THBS2/SPARC/CD248/MYL9/FBLN5/FBN1/CCBE1/ALOX15B/RCN3/PLA2G2C/LCP1/TNFAIP6/MMP13/DYSF/EDIL3/SGCA/C1S/ANXA8L1/LTBP2/DNASE1L2/FAT3/FBLN2/CDH13/NAALADL1/SYT1/PCDHGA11/EFEMP1/MATN3/EFEMP2/PCDHGA3/PCDHGA8/MCTP1/FSTL1/LOXL2/PCDHGA12/CDH2/MYL11/EFCAB12/DGKG/TGM2/NID2/PCDHGA4/SYT11/FBLN1/FKBP10/SNED1/SLIT3/MEX3B/THBS1/PCDHGB2/LTBP4/PCDHGB7/PLCG1/DUOX2/LTBP1/PITPNM3/CDK5R1/DLL4/CDH6…
BP	GO:0030335	positive regulation of cell migration	393	0.399378	1.59874	1.40532e-05	0.000983862	0.000865083	1613	tags=22%, list=12%, signal=20%	THY1/POSTN/ADGRA2/PDGFRB/SPARC/TWIST1/IGFBP5/ACKR3/SYDE1/ITGA4/SEMA3G/CCBE1/MMP2/TNFAIP6/DDR2/COL1A1/WDR62/LEF1/LBP/PDGFRA/FN1/WNT5A/CDH13/FGF1/FERMT2/ITGA5/ITGB3/GLIPR2/CD40/TNFRSF18/SERPINE1/DAAM2/TNFSF14/ICAM1/CAMK1D/CXCL12/SNAI2/MCAM/EPHB2/FLNA/CCR1/DRD1/GPNMB/MYADM/SNAI1/TGFBR1/SMO/SUN2/WNT5B/IL1B/THBS1/ITGB1/DOCK8/PDGFB/PLCG1/PIK3CD/SPHK1/PPM1F/PLAU/PDGFC/PAX6/SRPX2/WNT7A/MMP14/SMIM22/ZC3H1…
BP	GO:2000147	positive regulation of cell motility	406	0.396368	1.59533	8.97311e-06	0.000690338	0.000606995	1613	tags=22%, list=12%, signal=20%	THY1/POSTN/ADGRA2/PDGFRB/SPARC/TWIST1/IGFBP5/ACKR3/SYDE1/ITGA4/SEMA3G/CCBE1/MMP2/TNFAIP6/DDR2/COL1A1/WDR62/LEF1/LBP/PDGFRA/FN1/WNT5A/CDH13/FGF1/FERMT2/ITGA5/ITGB3/GLIPR2/CD40/TNFRSF18/SERPINE1/DAAM2/TNFSF14/ICAM1/CAMK1D/CXCL12/SNAI2/MCAM/EPHB2/FLNA/CCR1/DRD1/GPNMB/MYADM/SNAI1/TGFBR1/SMO/SUN2/WNT5B/IL1B/THBS1/ITGB1/DOCK8/PDGFB/PLCG1/PIK3CD/DUOX2/SPHK1/PPM1F/PLAU/PDGFC/PAX6/SRPX2/WNT7A/MMP14/SMIM22…
BP	GO:0043542	endothelial cell migration	173	0.433281	1.59435	0.000645009	0.0195084	0.0171532	1421	tags=22%, list=11%, signal=20%	DCN/ADGRA2/SPARC/FAP/ZEB2/CCBE1/VSTM4/WNT5A/PLXND1/CDH13/FGF1/ITGB3/CD40/SCG2/FSTL1/LOXL2/SNAI2/VASH1/TNFSF12/TGFBR1/THBS1/ITGB1/PDGFB/CLN3/PLCG1/PIK3CD/DLL4/SRPX2/WNT7A/ZC3H12A/SRF/GPX1/S100A2/RGCC/APOE/SASH1/HSPB1/HIF1A
BP	GO:0021915	neural tube development	133	0.448311	1.59112	0.00279505	0.0485562	0.0426942	1868	tags=20%, list=14%, signal=17%	TWIST1/CTHRC1/GLI3/DACT1/WNT5A/DZIP1L/FZD2/NOG/PTK7/SMO/CHRD/DVL1/VANGL2/PAX6/SEMA3C/SEMA4C/HIF1A/RARA/TGFB2/CELSR1/GLI2/FZD6/ZFP36L1/KDM2B/ABL1/TEAD2
BP	GO:0042692	muscle cell differentiation	270	0.409207	1.59104	0.00012039	0.0054029	0.00475062	2693	tags=33%, list=20%, signal=27%	PDGFRB/MYL9/HOPX/LOX/ENG/IGFBP5/TBX2/EDNRA/TMEM204/LAMA2/PDGFRA/SPEG/EFEMP2/ANKRD1/TNNT1/TNFSF14/POPDC3/FZD7/FLNC/CDH2/NOX4/ALPK3/ZEB1/ZBED6/MEIS1/ADAMTS15/TMOD4/SMO/TBX18/WNT5B/ITGB1/PDGFB/MAPK11/PLEKHO1/PIEZO1/CTNNB1/FHOD3/CACNA1H/ADAM12/MMP14/NFATC1/TMOD2/MTLN/SRF/GPX1/TPM1/ACVR1/SEMA4C/NID1/CACNB4/RARA/PLEC/BDNF/SYNE1/UCHL1/SOD2/RBPJ/NIBAN2/MEF2A/CDK1/FOXP1/MYH9/IGF2/ACTN1/FOXO4/FHL2/KDM1A/SM…
BP	GO:0007169	transmembrane receptor protein tyrosine kinase signaling pathway	457	0.391184	1.5875	3.13104e-06	0.00030445	0.000267694	2087	tags=23%, list=15%, signal=20%	SULF1/DCN/ADGRA2/PDGFRB/EMILIN1/LOX/PLAT/IGFBP5/TBX2/CCBE1/TMEM204/VAV1/MMP2/DDR2/COL1A1/PDGFRA/CSPG4/WNT5A/HHIP/CDH13/FGF1/SHC3/EFEMP1/ROS1/ITGA5/ITGB3/ZGPAT/NTF4/LTK/NOG/NRTN/COL4A1/COL4A2/PTPRE/EPHB2/NKX3-1/PDGFRL/GHRL/MVB12B/CCN2/DDIT4/FAM83A/EFNB3/SOCS1/RUNX2/IL1B/THBS1/IL31RA/PDGFB/PLCG1/PIK3CD/AFAP1L2/INPPL1/AXL/CTNNB1/CDK5R1/PDGFC/EFNA5/FOXC1/COL4A3/PID1/TNS2/SOCS3/CADM1/SOCS2/CBL/NPR2/RA…
BP	GO:0048568	embryonic organ development	292	0.402213	1.58038	0.000124487	0.00555117	0.00488099	1469	tags=21%, list=11%, signal=19%	PRRX1/TWIST1/ENG/CTHRC1/TBX2/EDNRA/FBN1/HOXB2/GLI3/IL10/GLI1/LEF1/PDGFRA/WNT5A/E2F7/FZD2/EFEMP1/MFAP2/NOG/PTK7/ZEB1/EPHB2/MDFI/TBX6/SALL1/SNAI1/VASH1/RUNX2/TGFBR1/ADA/SMO/TBX18/MFAP5/PDGFB/RPL38/DVL1/VANGL2/CTNNB1/INSIG1/PAX6/COL27A1/FOXC1/JUNB/MMP14/SOCS3/SRF/LRIG3/FOXH1/NDST1/WNT11/BBS5/MBD2/TGFB3/IHH/PDZD7/ACVR1/HIF1A/CEBPB/RARA/TGFB2
BP	GO:0061061	muscle structure development	465	0.388474	1.58037	9.99158e-06	0.000752162	0.000661355	2493	tags=27%, list=18%, signal=23%	PDGFRB/TWIST1/MYL9/COL6A3/HOPX/LOX/ENG/IGFBP5/TAGLN/TBX2/EDNRA/TMEM204/SGCA/LAMA2/LEF1/PDGFRA/WNT5A/SPEG/FZD2/EFEMP2/SCX/CENPF/ANKRD1/NOG/TNNT1/TNFSF14/POPDC3/FZD7/LGALS1/FLNC/CDH2/MYL11/NOX4/ALPK3/ITGA11/ZEB1/ZBED6/MEIS1/ADAMTS15/TMOD4/EGR1/TGFBR1/SMO/TBX18/WNT5B/ITGB1/PDGFB/MAPK11/PLEKHO1/BASP1/PIEZO1/PDLIM4/CTNNB1/FHOD3/ELN/DLL4/CACNA1H/FOXC1/ADAM12/CAVIN4/MMP14/NFATC1/TMOD2/MTLN/HEG1/SRF/GPX1…
BP	GO:0040017	positive regulation of locomotion	412	0.392112	1.57822	3.29054e-05	0.00191674	0.00168534	1613	tags=22%, list=12%, signal=20%	THY1/POSTN/ADGRA2/PDGFRB/SPARC/TWIST1/IGFBP5/ACKR3/SYDE1/ITGA4/SEMA3G/CCBE1/MMP2/TNFAIP6/DDR2/COL1A1/WDR62/LEF1/LBP/PDGFRA/FN1/WNT5A/CDH13/FGF1/FERMT2/ITGA5/ITGB3/GLIPR2/CD40/TNFRSF18/SERPINE1/SCG2/DAAM2/TNFSF14/ICAM1/CAMK1D/CXCL12/SNAI2/MCAM/EPHB2/FLNA/CCR1/DRD1/GPNMB/MYADM/SNAI1/TGFBR1/SMO/SUN2/WNT5B/IL1B/THBS1/ITGB1/DOCK8/PDGFB/PLCG1/PIK3CD/DUOX2/SPHK1/PPM1F/PLAU/PDGFC/PAX6/SRPX2/WNT7A/MMP14/S…
CC	GO:0005788	endoplasmic reticulum lumen	239	0.413287	1.57608	0.000238616	0.00909405	0.00799615	1051	tags=21%, list=8%, signal=19%	SPARCL1/COL1A2/COL8A1/COL6A3/COL5A2/IGFBP5/COL6A2/FBN1/RCN3/COL1A1/COL5A1/MXRA8/AMTN/FN1/WNT5A/CERCAM/GIP/MATN3/GPX7/ADAMTS7/SCG2/IGFBP7/FSTL1/COL7A1/LGALS1/CDH2/COL4A1/COL4A2/GHRL/CP/COL12A1/TNC/VGF/FKBP10/WNT5B/THBS1/PDGFB/COL5A3/COL6A1/P4HA3/C3/LTBP1/COLGALT1/PDGFC/COL27A1/COL4A3/TXNDC12/WNT7A/FKBP14
MF	GO:0001227	DNA-binding transcription repressor activity, RNA polymerase II-specific	233	0.41455	1.57584	0.00028172	0.0103263	0.00907962	2806	tags=33%, list=21%, signal=26%	AEBP1/PRRX1/ZEB2/TBX2/LEF1/FOXS1/E2F7/DMBX1/ZGPAT/ZNF491/SNAI2/ZEB1/ZBED6/HIC1/ZNF550/SALL1/SNAI1/NR2F1/TBX18/ZNF337/ZBTB34/ZNF20/JDP2/ZNF93/ZNF554/ZNF343/PAX6/MAFK/POU6F1/ELK3/ZNF140/ZNF133/BCL11A/ZNF175/CEBPB/CUX2/ZNF764/CC2D1B/ZNF749/ZNF674/BHLHE40/ZNF559/ZBTB39/ZNF25/ZNF69/SKIL/ZNF79/ZNF266/ZBTB8A/ZNF134/HES2/FOXP1/SREBF2/ZNF169/ZNF281/ZNF778/E4F1/ZBED2/ZNF439/JUN/NACC2/ZBTB49/ZNF202/NACC1/ZF…
BP	GO:0014706	striated muscle tissue development	167	0.428892	1.57422	0.0012326	0.0291455	0.0256268	2194	tags=31%, list=16%, signal=26%	PDGFRB/TWIST1/HOPX/LOX/ENG/TBX2/EDNRA/GLI1/LEF1/PDGFRA/WNT5A/CENPF/ANKRD1/NOG/FZD7/NOX4/ALPK3/MEIS1/TGFBR1/TBX18/ITGB1/MAPK11/GJA1/EYA2/FHOD3/DLL4/FOXC1/HEG1/SEMA3C/SRF/TPM1/FOXH1/ACVR1/RARA/TGFB2/SMAD7/NOTCH2/PLEC/ABL1/RUNX1/SYNE1/RBPJ/MEF2A/CDK1/FOXP1/FGF20/ADAMTS9/PPP1R13L/FHL2/FGF2/SGCB
BP	GO:0007178	transmembrane receptor protein serine/threonine kinase signaling pathway	273	0.403877	1.5671	9.4531e-05	0.0044717	0.00393185	1041	tags=14%, list=8%, signal=13%	COL1A2/SULF1/ZEB2/EMILIN1/LOX/LRRC32/ENG/FBN1/DMRT1/FOXD1/TNFAIP6/BMPR1B/FMOD/LEF1/LTBP2/WNT5A/HTRA1/FERMT2/SCX/INHBA/NOG/FSTL1/TGFB1I1/ZEB1/ITGB6/SNX25/EGR1/RUNX2/TGFBR1/THBS1/LTBP4/CHRD/NREP/LDLRAD4/LTBP1/PMEPA1/CDKN2B/PEG10
BP	GO:0010810	regulation of cell-substrate adhesion	170	0.425688	1.56664	0.00204752	0.0407182	0.0358024	1057	tags=18%, list=8%, signal=16%	THY1/POSTN/COL8A1/EMILIN1/COL1A1/EDIL3/FN1/CCDC80/FBLN2/CDH13/CD36/FERMT2/EFEMP2/LIMS2/ITGA5/ITGB3/SERPINE1/CSPG5/GBP1/FZD7/FLNA/FBLN1/MYADM/THBS1/PDGFB/PPM1F/PLAU/SPOCK1/EFNA5/MMP14
BP	GO:0001649	osteoblast differentiation	171	0.424513	1.56083	0.00144921	0.0328347	0.0288706	1422	tags=19%, list=11%, signal=17%	TWIST1/LOX/IGFBP5/CTHRC1/TNFAIP6/DDR2/COL1A1/BMPR1B/GLI3/GLI1/LEF1/FERMT2/NOG/TP63/ITGA11/SNAI2/MRC2/TNC/SNAI1/RUNX2/SMO/CHRD/MAPK11/COL6A1/CTNNB1/SOX2/TPM4/JUNB/FASN/WNT11/IHH/ACVR1/CEBPB
BP	GO:0050673	epithelial cell proliferation	307	0.396431	1.56047	0.000115398	0.00528038	0.0046429	1422	tags=19%, list=11%, signal=18%	SULF1/COL8A1/SPARC/TWIST1/FAP/ZEB2/IGFBP5/TBX2/ITGA4/VSTM4/IL10/GLI1/WNT5A/CDH13/FGF1/LIMS2/ITGB3/SCG2/NOG/LOXL2/CCL2/FZD7/TP63/CXCL12/SNAI2/ZEB1/NKX3-1/KRT4/GHRL/EPPK1/CCR3/VASH1/TNFSF12/RUNX2/TGFBR1/SMO/NFKBIZ/THBS1/UHRF1/PDGFB/PLCG1/PIK3CD/CTNNB1/DLL4/PAX6/SOX2/CDKN2B/COL4A3/WNT7A/MMP14/GPX1/RGCC/CDH3/APOE/F3/XDH/IHH/HIF1A/CEBPB
CC	GO:0000776	kinetochore	152	0.430046	1.55405	0.00162458	0.034782	0.0305828	2144	tags=19%, list=16%, signal=16%	HJURP/NUF2/PLK1/NEK2/NDC80/CENPF/AURKB/SPAG5/KIF2C/BUB1/DYNC1I1/BIRC5/ERCC6L/CENPO/SPC24/SGO2/CENPQ/GPATCH11/CENPI/ACTB/DCTN4/TTK/SPDL1/CCNB1/CENPE/SKA2/CBX5/FBXW11/SMARCD1
MF	GO:0050839	cell adhesion molecule binding	428	0.382239	1.54373	2.12843e-05	0.00137973	0.00121316	2046	tags=20%, list=15%, signal=17%	THY1/POSTN/CDH11/ITGBL1/FBLN5/FAP/EMILIN1/FBN1/ITGA4/LCP1/COL5A1/EDIL3/FN1/CDH13/FGF1/FERMT2/KIRREL1/ITGA5/ITGB3/DIAPH3/ICAM1/CDH2/ANLN/CXCL12/ITGA11/ITGA10/PAK6/NEXN/CCN2/FLNA/ITGB6/GPNMB/FBLN1/TGFBI/CPE/IL1B/THBS1/LTBP4/ITGB1/PKP1/RPS26/CTNNB1/CDK5R1/CDH6/COL4A3/MMP14/CALD1/CADM1/MSN/S1PR2/PALLD/CBL/FASN/COL16A1/RPL34/CDH3/CCNB2/VCL/ACVR1/ITGB1BP2/EEF1G/MADCAM1/CNN2/ITGAV/NOTCH3/PLEC/DOCK9/NHER…
BP	GO:0016055	Wnt signaling pathway	356	0.386803	1.54153	0.000108043	0.00500931	0.00440455	1864	tags=18%, list=14%, signal=16%	SULF1/ADGRA2/ZEB2/CTHRC1/EDNRA/FOXD1/COL1A1/ASPM/GLI3/GLI1/LEF1/DACT1/WNT5A/FZD2/FERMT2/NOG/DAAM2/PTK7/FZD7/CDH2/GPRC5B/SNAI2/TGFB1I1/HIC1/TRABD2B/MDFI/DRAXIN/RECK/SALL1/CPE/FZD8/EGR1/TBX18/WNT5B/DVL1/VANGL2/CTNNB1/PYGO1/TLE3/SOX2/WNT7A/WNT11/CDH3/APOE/SPIN1/MBD2/GPC4/BICC1/NID1/DKK3/DIXDC1/GRB10/CELSR1/DAPK3/WLS/PTPRU/FZD6/PORCN/SULF2/NKD1/CAPRIN2/CTNND1/ABL1/SMURF1/BMAL1
BP	GO:0198738	cell-cell signaling by wnt	357	0.38643	1.53998	9.77938e-05	0.00456436	0.00401332	1864	tags=18%, list=14%, signal=16%	SULF1/ADGRA2/ZEB2/CTHRC1/EDNRA/FOXD1/COL1A1/ASPM/GLI3/GLI1/LEF1/DACT1/WNT5A/FZD2/FERMT2/NOG/DAAM2/PTK7/FZD7/CDH2/GPRC5B/SNAI2/TGFB1I1/HIC1/TRABD2B/MDFI/DRAXIN/RECK/SALL1/CPE/FZD8/EGR1/TBX18/WNT5B/DVL1/VANGL2/CTNNB1/PYGO1/TLE3/SOX2/WNT7A/WNT11/CDH3/APOE/SPIN1/MBD2/GPC4/BICC1/NID1/DKK3/DIXDC1/GRB10/CELSR1/DAPK3/WLS/PTPRU/FZD6/PORCN/SULF2/NKD1/CAPRIN2/CTNND1/ABL1/SMURF1/BMAL1
CC	GO:0000775	chromosome, centromeric region	222	0.404997	1.53854	0.00100849	0.0255813	0.0224929	2056	tags=18%, list=15%, signal=15%	CENPA/HJURP/NUF2/PLK1/NEK2/NDC80/NCAPG/CENPF/AURKB/SPAG5/KIF2C/BUB1/DYNC1I1/OIP5/H4C3/SNAI1/BIRC5/ERCC6L/CENPO/SPC24/SGO2/CENPQ/GPATCH11/TOP2A/CBX1/CENPI/CEBPB/ACTB/CENPB/HELLS/DCTN4/TTK/SPDL1/CCNB1/CENPE/SKA2/CBX5/H4C5/FBXW11
BP	GO:0140694	non-membrane-bounded organelle assembly	326	0.386963	1.53273	0.000216145	0.00854931	0.00751718	1204	tags=12%, list=9%, signal=11%	PDGFRB/CENPA/MYL9/LCP1/PLK1/ASPM/WDR62/NEK2/PDGFRA/NDC80/CENPF/ANKRD1/TNNT1/AURKB/KIF23/FLNC/ANLN/SQLE/SPAG5/FLNA/TMOD4/BIRC5/PRC1/ITGB1/RPL38/RPS27/FHOD3/MAPRE3/PWP2/SMIM22/RPS28/TMOD2/HAUS5/MSN/SRF/SH3PXD2B/DLGAP5/TPM1
BP	GO:0030324	lung development	148	0.427486	1.53187	0.00276189	0.0482194	0.042398	734	tags=16%, list=5%, signal=15%	HOPX/LOX/IGFBP5/TBX2/CCBE1/RCN3/ADAMTS2/CRISPLD2/GLI3/GLI1/CHI3L1/PDGFRA/WNT5A/HHIP/FGF1/NOG/KLF2/PTK7/TNC/CCN2/ITGB6/SIM2/ADA
BP	GO:0030323	respiratory tube development	152	0.423633	1.53088	0.00207987	0.0409023	0.0359642	734	tags=15%, list=5%, signal=14%	HOPX/LOX/IGFBP5/TBX2/CCBE1/RCN3/ADAMTS2/CRISPLD2/GLI3/GLI1/CHI3L1/PDGFRA/WNT5A/HHIP/FGF1/NOG/KLF2/PTK7/TNC/CCN2/ITGB6/SIM2/ADA
BP	GO:0030111	regulation of Wnt signaling pathway	261	0.395451	1.53049	0.000411452	0.0138489	0.012177	1864	tags=19%, list=14%, signal=17%	SULF1/ADGRA2/ZEB2/CTHRC1/COL1A1/ASPM/GLI3/GLI1/LEF1/DACT1/WNT5A/NOG/DAAM2/PTK7/FZD7/CDH2/GPRC5B/SNAI2/HIC1/TRABD2B/MDFI/DRAXIN/RECK/SALL1/EGR1/TBX18/WNT5B/CTNNB1/TLE3/SOX2/WNT11/CDH3/APOE/SPIN1/MBD2/BICC1/DKK3/DIXDC1/GRB10/DAPK3/WLS/PTPRU/FZD6/SULF2/NKD1/CAPRIN2/CTNND1/ABL1/BMAL1
BP	GO:0048729	tissue morphogenesis	437	0.373982	1.51335	4.74613e-05	0.00251725	0.00221335	1917	tags=23%, list=14%, signal=20%	SULF1/TWIST1/ENG/IGFBP5/CTHRC1/TBX2/EDNRA/HOXB2/MMP2/FOXD1/COL5A1/GLI3/IL10/LEF1/DACT1/WNT5A/HHIP/TMEM59L/PLXND1/FGF1/FZD2/FERMT2/EFEMP2/ITGA5/ITGB3/SCX/INHBA/ANKRD1/NOG/PTK7/FZD7/MYL11/COL4A1/TP63/SNAI2/TGFB1I1/NKX3-1/TGM2/HS3ST3B1/TNC/FLNA/TBX6/SALL1/RIPK4/SNAI1/TGFBR1/SMO/TBX18/WNT5B/KRT17/ITGB1/PIK3CD/GJA1/DVL1/VANGL2/EYA2/CTNNB1/DLL4/FOXC1/WNT7A/MMP14/HEG1/SOCS3/SEMA3C/MSN/SRF/PODXL/TPM1/FOX…
BP	GO:0090132	epithelium migration	245	0.395252	1.51273	0.000886082	0.023943	0.0210525	1490	tags=20%, list=11%, signal=18%	DCN/ADGRA2/SPARC/FAP/ZEB2/CCBE1/VSTM4/WNT5A/PLXND1/CDH13/FGF1/ITGB3/GLIPR2/CD40/SCG2/DAAM2/FSTL1/LOXL2/ANLN/SNAI2/EPPK1/SNAI1/VASH1/TNFSF12/TGFBR1/THBS1/ITGB1/PDGFB/CLN3/PLCG1/PIK3CD/PPM1F/DLL4/SRPX2/WNT7A/ZC3H12A/SRF/GPX1/S100A2/KANK2/RGCC/APOE/SASH1/HSPB1/CORO1A/HIF1A/PTPRG/TGFB2/VIL1
BP	GO:0090130	tissue migration	246	0.39464	1.51225	0.000592473	0.0184351	0.0162095	1490	tags=20%, list=11%, signal=18%	DCN/ADGRA2/SPARC/FAP/ZEB2/CCBE1/VSTM4/WNT5A/PLXND1/CDH13/FGF1/ITGB3/GLIPR2/CD40/SCG2/DAAM2/FSTL1/LOXL2/ANLN/SNAI2/EPPK1/SNAI1/VASH1/TNFSF12/TGFBR1/THBS1/ITGB1/PDGFB/CLN3/PLCG1/PIK3CD/PPM1F/DLL4/SRPX2/WNT7A/ZC3H12A/SRF/GPX1/S100A2/KANK2/RGCC/APOE/SASH1/HSPB1/CORO1A/HIF1A/PTPRG/TGFB2/VIL1
BP	GO:0010631	epithelial cell migration	244	0.395376	1.51162	0.000424878	0.0141654	0.0124553	1490	tags=20%, list=11%, signal=18%	DCN/ADGRA2/SPARC/FAP/ZEB2/CCBE1/VSTM4/WNT5A/PLXND1/CDH13/FGF1/ITGB3/GLIPR2/CD40/SCG2/DAAM2/FSTL1/LOXL2/ANLN/SNAI2/EPPK1/SNAI1/VASH1/TNFSF12/TGFBR1/THBS1/ITGB1/PDGFB/CLN3/PLCG1/PIK3CD/PPM1F/DLL4/SRPX2/WNT7A/ZC3H12A/SRF/GPX1/S100A2/KANK2/RGCC/APOE/SASH1/HSPB1/CORO1A/HIF1A/PTPRG/TGFB2/VIL1
BP	GO:0060485	mesenchyme development	213	0.398179	1.50466	0.00170736	0.0358972	0.0315634	1989	tags=25%, list=15%, signal=22%	TWIST1/ENG/TBX2/EDNRA/SEMA3G/FOXD1/COL1A1/LEF1/FN1/WNT5A/FERMT2/GLIPR2/SCX/NOG/LOXL2/NRTN/PTK7/CDH2/SNAI2/TGFB1I1/FLNA/SNAI1/TGFBR1/SMO/IL1B/AKNA/BASP1/PHLDB1/LDLRAD4/CTNNB1/PAX6/FOXC1/SEMA3C/RGCC/FOXH1/WNT11/SPRED3/TGFB3/ACVR1/SEMA4C/HIF1A/TGFB2/SMAD7/ZFP36L1/OSR1/AMH/SEMA4B/TEAD2/NRP1/JAG1/RBPJ/SEMA4F/HNRNPAB/PHLDB2
BP	GO:0060537	muscle tissue development	280	0.38566	1.50106	0.000624493	0.0192603	0.016935	2194	tags=25%, list=16%, signal=21%	PDGFRB/TWIST1/HOPX/LOX/ENG/IGFBP5/TBX2/EDNRA/GLI1/LEF1/PDGFRA/WNT5A/EFEMP2/SCX/CENPF/ANKRD1/NOG/POPDC3/FZD7/MYL11/NOX4/ALPK3/MEIS1/EGR1/TGFBR1/SMO/TBX18/ITGB1/MAPK11/GJA1/EYA2/CTNNB1/FHOD3/ELN/DLL4/FOXC1/HEG1/SEMA3C/SRF/GPX1/NPR2/TPM1/FOXH1/IHH/ACVR1/RARA/TGFB2/SMAD7/NOTCH2/HIVEP3/USP19/PLEC/OSR1/FOSL2/ABL1/BMAL1/RUNX1/SYNE1/RBPJ/NIBAN2/MEF2A/CDK1/FOXP1/FGF20/IGF2/ADAMTS9/PPP1R13L/FHL2/FGF2/SGCB
BP	GO:0050808	synapse organization	286	0.384241	1.50033	0.00072108	0.0212252	0.0186628	2046	tags=25%, list=15%, signal=22%	SPARCL1/THBS2/NPTX1/SRGN/PDZRN3/IL10/WNT5A/RAPSN/ARHGAP22/PLXND1/ITGB3/CACNB2/ZNF365/PTK7/CDH2/COL4A1/CACNB1/EPHB2/GHRL/TNC/FLNA/PTPRS/SNAP25/DRD1/EFNB3/TANC2/ITGB1/AMIGO2/CLN3/DVL1/C3/CTNNB1/CDK5R1/CDH6/SRPX2/EFNA5/DLG4/WNT7A/NEGR1/CBLN3/PALM/MAP1B/LRFN4/STK38L/APOE/DOK7/LRRN1/GPC4/CUX2/CACNB4/ACTB/SPTB/SSH1/SRGAP2/SYNPO/AGRN/SHANK2/BDNF/CAPRIN2/CAP2/ABL1/COL4A5/NRP1/SPTBN2/ADGRL3/LRRC4C/PLXNB1/…
BP	GO:0048589	developmental growth	463	0.368087	1.49696	5.78454e-05	0.00298733	0.00262668	2053	tags=23%, list=15%, signal=20%	POSTN/HOPX/TRPV2/TBX2/EDNRA/ITGA4/SEMA3G/TNFAIP6/MMP13/DDR2/BMPR1B/SGCA/ASPM/GLI3/GLI1/FOXS1/FN1/WNT5A/FGF1/SYT1/DMBX1/NOG/KLF2/PTK7/FZD7/CXCL12/PTX3/PAK6/MEIS1/GHRL/TNC/DRAXIN/PTPRS/EPPK1/SALL1/TGFBR1/SMO/SLIT3/ITGB1/MAPK11/BASP1/DVL1/CTNNB1/COL27A1/SOX2/EFNA5/FOXC1/PLXNA3/GPAM/WNT7A/TNS2/HEG1/SOCS2/SEMA3C/MAP1B/SRF/GPX1/NPR2/WNT11/ULK1/APOE/ARHGAP4/VCL/SYT17/IHH/BCL11A/SEMA4C/SLC9A6/LIMK1/RARA/…
BP	GO:0045596	negative regulation of cell differentiation	435	0.368782	1.49147	0.000138836	0.00615185	0.00540916	2087	tags=24%, list=15%, signal=21%	THY1/TWIST1/HOPX/COL5A2/IGFBP5/FBN1/SEMA3G/PRTG/TNFAIP6/PAEP/COL5A1/ASPM/GLI3/WNT5A/GPR68/FERMT2/EFEMP1/ITGB3/INHBA/ADAMTS7/LRRC17/NOG/DAAM2/FZD7/TP63/SNAI2/TGFB1I1/ZEB1/ZBED6/EPHB2/MEIS1/TRIM6/DRAXIN/PTPRS/H4C3/TBX6/EFNB3/BBS12/SNAI1/SOCS1/TGFBR1/SMO/IL1B/ITGB1/PDGFB/CHRD/JDP2/LDLRAD4/CTNNB1/INSIG1/PAX6/SOX2/CDKN2B/PLXNA3/BRD9/WNT7A/NFATC1/RFLNA/ZC3H12A/SEMA3C/NPR2/E2F1/ULK1/XDH/LDLR/ARHGAP4/SPR…
BP	GO:0060562	epithelial tube morphogenesis	232	0.392669	1.48987	0.00116471	0.028313	0.0248949	2001	tags=24%, list=15%, signal=21%	TWIST1/ENG/CTHRC1/TBX2/EDNRA/FOXD1/GLI3/LEF1/WNT5A/HHIP/TMEM59L/PLXND1/FGF1/FZD2/NOG/PTK7/COL4A1/NKX3-1/HS3ST3B1/TNC/TBX6/SALL1/SMO/PIK3CD/DVL1/VANGL2/CTNNB1/DLL4/MMP14/SRF/PODXL/FOXH1/WNT11/BBS5/IHH/ACVR1/SEMA4C/HIF1A/RARA/TGFB2/CSF1/CELSR1/NOTCH2/GREB1L/GLI2/FZD6/OSR1/KDM2B/ABL1/TEAD2/NRP1/FMN1/RBPJ/ESRP2/FOXP1
BP	GO:0034330	cell junction organization	491	0.36222	1.48375	6.60647e-05	0.00321194	0.00282417	2085	tags=24%, list=15%, signal=21%	SPARCL1/THY1/CDH11/THBS2/NPTX1/SRGN/HOPX/PDZRN3/IL10/FN1/WNT5A/RAPSN/CLDN11/ARHGAP22/PLXND1/CDH13/FERMT2/LIMS2/KIRREL1/ITGA5/ITGB3/CACNB2/ZNF365/PTK7/CDH2/COL4A1/SNAI2/CACNB1/EPHB2/GHRL/TNC/FLNA/PTPRS/SNAP25/DRD1/EFNB3/SNAI1/TGFBR1/TANC2/NUMBL/IL1B/THBS1/ITGB1/AMIGO2/CLN3/KIFC3/GJA1/DVL1/PKP1/C3/CTNNB1/CLDN6/PPM1F/CDK5R1/CDH6/SRPX2/EFNA5/CLDN14/DLG4/WNT7A/MMP14/NEGR1/HEG1/CBLN3/PALM/MAP1B/SRF/LRF…
BP	GO:0140014	mitotic nuclear division	237	0.389553	1.48118	0.00236186	0.0446901	0.0392948	2364	tags=20%, list=18%, signal=17%	PDGFRB/DMRT1/CCDC8/NUF2/PLK1/MKI67/NEK2/NDC80/NCAPG/CENPF/AURKB/KIF23/ANLN/KIF14/SPAG5/KIF2C/BUB1/CDCA2/FLNA/UBE2C/BIRC5/PRC1/IL1B/PDGFB/SPHK1/SPC24/DLGAP5/RGCC/CENPI/NCAPG2/TENT4A/DAPK3/NCAPH/TTK/SPDL1/CCNB1/CEP85/CENPE/CDK1/IGF2/KLHDC8B/KIF11/TUBG2/KIF18A/PHF13/STAG1/KIFC2/GOLGA2
BP	GO:0003002	regionalization	259	0.383199	1.48081	0.00123169	0.0291455	0.0256268	1921	tags=23%, list=14%, signal=20%	ENG/TBX2/HOXB2/FOXD1/BMPR1B/HES7/GLI3/GLI1/LEF1/WNT5A/HHIP/FGF1/DZIP1L/NTF4/NOG/DAAM2/TP63/CFAP45/NKX3-1/MDFI/TBX6/SNAI1/CHSY1/TGFBR1/SMO/TBX18/CHRD/BASP1/DVL1/C3/VANGL2/CTNNB1/DLL4/PAX6/FOXC1/WNT7A/SEMA3C/SRF/FOXH1/WNT11/BBS5/IHH/BICC1/ACVR1/HIF1A/ADGRG1/BMP1/RTTN/DNAH11/NOTCH2/BHLHE40/WLS/GLI2/OSR1/NKD1/KDM2B/NRP1/HES2/RBPJ/PBX3
BP	GO:0007517	muscle organ development	228	0.389104	1.47746	0.00271972	0.0478752	0.0420954	1665	tags=20%, list=12%, signal=18%	TWIST1/COL6A3/LOX/ENG/TAGLN/EDNRA/SGCA/LAMA2/LEF1/WNT5A/SPEG/FZD2/EFEMP2/SCX/CENPF/ANKRD1/NOG/POPDC3/MYL11/ITGA11/EGR1/TGFBR1/SMO/ITGB1/BASP1/CTNNB1/ELN/DLL4/CACNA1H/FOXC1/CAVIN4/HEG1/GPX1/TPM1/FOXH1/POU6F1/SMTN/ITGB1BP2/CTF1/TGFB2/SGCE/SMAD7/HIVEP3/CHKB/USP19/PLEC
BP	GO:0043009	chordate embryonic development	478	0.359128	1.46407	0.000181478	0.00770016	0.00677054	1774	tags=18%, list=13%, signal=16%	SULF1/PRRX1/TWIST1/HOPX/CTHRC1/EDNRA/HOXB2/COL1A1/HES7/GLI3/IL10/NEK2/LEF1/DACT1/PDGFRA/WNT5A/DZIP1L/E2F7/FZD2/SCX/NOG/KLF2/PTK7/SLC34A2/ZEB1/ZBED6/NKX3-1/PLPP4/MDFI/RRM2/TBX6/SNAI1/VASH1/FKBP10/RUNX2/TGFBR1/ADA/SMO/TBX18/ITGB1/PDGFB/CHRD/CMTM3/PLCG1/DVL1/VANGL2/CTNNB1/PAX6/FOXC1/JUNB/MMP14/HEG1/SOCS3/SEMA3C/SRF/NMT1/NDST1/WNT11/CCNB2/TGFB3/SEC24C/FURIN/IHH/ACVR1/SEMA4C/HIF1A/CEBPB/RARA/TGFB2/NCA…
BP	GO:0034329	cell junction assembly	284	0.373142	1.46036	0.00156656	0.0343808	0.0302301	2333	tags=29%, list=17%, signal=24%	THY1/CDH11/THBS2/NPTX1/HOPX/FN1/WNT5A/CLDN11/PLXND1/CDH13/FERMT2/ITGA5/ITGB3/CDH2/SNAI2/EPHB2/GHRL/PTPRS/SNAP25/DRD1/EFNB3/SNAI1/IL1B/THBS1/AMIGO2/GJA1/DVL1/PKP1/CTNNB1/CLDN6/PPM1F/CDH6/SRPX2/EFNA5/CLDN14/WNT7A/MMP14/NEGR1/MAP1B/SRF/LRFN4/AJUBA/COL16A1/WNT11/CDH3/PIP5K1A/VCL/LRRN1/GPC4/CUX2/ACTB/SRGAP2/SMAD7/DAPK3/AGRN/PLEC/TRIP6/SHANK2/BDNF/STON1/CTNND1/ABL1/TESK2/NRP1/SPTBN2/FMN1/ADGRL3/PLXNB1/…
CC	GO:0009986	cell surface	467	0.358802	1.45868	0.000295911	0.0106787	0.00938951	1435	tags=20%, list=11%, signal=19%	THY1/SULF1/ITGBL1/ADGRA2/SPARC/CD248/FAP/PXDN/FOLR3/BGN/LRRC32/PLAT/ENG/ACKR3/TRPV2/ITGA4/CTSK/SLC1A3/CRLF1/MXRA8/CLEC2B/ACKR2/LBP/PDGFRA/CSPG4/WNT5A/HHIP/CDH13/CD36/ZPLD1/TNS1/FERMT2/LAYN/ITGA5/ITGB3/ANTXR1/CD40/SRPX/TNFRSF18/ADAMTS7/CSPG5/ANOS1/KCNC1/CLEC2D/ICAM1/CDH2/CXCL12/GPRC5B/ITGA11/ITGA10/SLC7A5/MCAM/EPHB2/KRT4/HMMR/ADAMTS15/OSMR/CCR3/ITGB6/CCR1/TGFBR1/ADA/NTSR1/THBS1/SLC4A3/IL31RA/ITGB1…
BP	GO:0050804	modulation of chemical synaptic transmission	273	0.373508	1.44927	0.00134567	0.0310926	0.0273388	2149	tags=27%, list=16%, signal=23%	CDH11/SRGN/PLAT/DYSF/SLC1A3/ADCY1/LAMA2/MAP1A/WNT5A/RAPSN/DGKI/SYT1/TSHZ3/GIP/NTF4/MCTP1/CSPG5/CYP46A1/NOG/CCL2/SLC4A8/CDH2/EPHB2/GHRL/SYT11/PTPRS/SNAP25/VGF/DRD1/SYP/EFNB3/IL1B/KMO/ITGB1/CLN3/PLCG1/DVL1/SCTR/SLC6A9/DLG4/WNT7A/MAP1B/SRF/S1PR2/RIMS3/STX1A/HMGCR/APOE/ITPR3/CUX2/CACNB4/RARA/SSH1/UCN/HRH1/RASGRF2/SHANK2/BDNF/ABL1/RNF19A/YTHDF1/SYNE1/CHRNA5/FBXO2/LRRC4C/ERC2/ITPKA/TRIO/YWHAH/USP46/MTM…
BP	GO:0099177	regulation of trans-synaptic signaling	274	0.371245	1.44329	0.00233609	0.0444429	0.0390774	2149	tags=27%, list=16%, signal=23%	CDH11/SRGN/PLAT/DYSF/SLC1A3/ADCY1/LAMA2/MAP1A/WNT5A/RAPSN/DGKI/SYT1/TSHZ3/GIP/NTF4/MCTP1/CSPG5/CYP46A1/NOG/CCL2/SLC4A8/CDH2/EPHB2/GHRL/SYT11/PTPRS/SNAP25/VGF/DRD1/SYP/EFNB3/IL1B/KMO/ITGB1/CLN3/PLCG1/DVL1/SCTR/SLC6A9/DLG4/WNT7A/MAP1B/SRF/S1PR2/RIMS3/STX1A/HMGCR/APOE/ITPR3/CUX2/CACNB4/RARA/SSH1/UCN/HRH1/RASGRF2/SHANK2/BDNF/ABL1/RNF19A/YTHDF1/SYNE1/CHRNA5/FBXO2/LRRC4C/ERC2/ITPKA/TRIO/YWHAH/USP46/MTM…
BP	GO:0000280	nuclear division	331	0.363126	1.44004	0.00165238	0.0350841	0.0308485	2561	tags=23%, list=19%, signal=19%	PDGFRB/DMRT1/CCDC8/NUF2/PLK1/ASPM/MKI67/NEK2/WNT5A/NDC80/CCNA1/NCAPG/BRIP1/CENPF/AURKB/SYCE1L/KIF23/ANLN/KIF14/SPAG5/KIF2C/BUB1/CDCA2/FLNA/CNTD1/UBE2C/BIRC5/PRC1/IL1B/SYCE3/PDGFB/SPHK1/RPS6KA2/PDE3A/SPC24/FZR1/DLGAP5/NPR2/RGCC/TOP2A/CENPI/CCNB2/HSF2BP/PSMC3IP/NCAPG2/TENT4A/DAPK3/NCAPH/SLX4/TTK/CHFR/MYBL1/SPDL1/CCNB1/CEP85/CENPE/RMI1/CDK1/IGF2/HSPA2/KLHDC8B/ACTR3/KIF11/CCNE1/TUBG2/KIF18A/PHF13/STA…
BP	GO:0009792	embryo development ending in birth or egg hatching	495	0.350781	1.43545	0.000392701	0.0134112	0.0117921	1774	tags=17%, list=13%, signal=16%	SULF1/PRRX1/TWIST1/HOPX/CTHRC1/EDNRA/HOXB2/COL1A1/HES7/GLI3/IL10/NEK2/LEF1/DACT1/PDGFRA/WNT5A/DZIP1L/E2F7/FZD2/SCX/NOG/KLF2/PTK7/SLC34A2/ZEB1/ZBED6/NKX3-1/PLPP4/MDFI/RRM2/TBX6/SNAI1/VASH1/FKBP10/RUNX2/TGFBR1/ADA/SMO/TBX18/ITGB1/PDGFB/CHRD/CMTM3/PLCG1/DVL1/VANGL2/CTNNB1/CDK5R1/PAX6/FOXC1/JUNB/MMP14/HEG1/SOCS3/SEMA3C/SRF/NMT1/NDST1/WNT11/CCNB2/TGFB3/SEC24C/FURIN/IHH/ACVR1/ACSL4/SEMA4C/HIF1A/CEBPB/R…
BP	GO:0045785	positive regulation of cell adhesion	323	0.363039	1.43499	0.00257974	0.0470332	0.041355	2224	tags=27%, list=16%, signal=23%	THY1/COL8A1/EMILIN1/ITGA4/VAV1/EDIL3/GLI3/LAMA2/IL10/LEF1/FN1/CCDC80/WNT5A/FBLN2/CDH13/CD36/FERMT2/EFEMP2/LIMS2/ITGA5/ITGB3/TNFRSF18/CSPG5/TNFSF14/ADAM19/CCL2/LGALS1/CXCL12/MFSD2B/TGM2/FLNA/EFNB3/MYADM/SOCS1/NFKBID/ADA/NFKBIZ/IL1B/DOCK8/PDGFB/CHRD/PIEZO1/SOX12/PPM1F/SOX2/GPAM/UNC13D/PODXL/TPM1/COL16A1/IHH/CORO1A/ADGRG1/NID1/ACTB/RARA/TGFB2/CSF1/SMAD7/RASGRP1/ITGAV/ZP3/PTPRU/ITPKB/SLC7A1/GLI2/IL15…
CC	GO:0015629	actin cytoskeleton	370	0.353169	1.41106	0.00220693	0.0427997	0.0376326	2705	tags=27%, list=20%, signal=22%	HSPB7/CNN1/MYL9/TPM2/RGS22/LCP1/KLHL14/DDR2/ACKR2/SAMD14/NEURL1B/FERMT2/DIAPH3/GBP1/TNNT1/CDH2/ANLN/MYL11/DPYSL3/MPP4/NEXN/GAS7/FLNA/SNAP25/TMOD4/MYADM/BMF/AVIL/WAS/PSTPIP2/PDLIM4/MYO5A/WIPF1/AXL/SPTBN5/TPM4/CALD1/TMOD2/ABLIM3/RFLNA/CENPQ/SH3PXD2B/PALLD/PDLIM3/TPM1/PLS3/STK38L/SMTN/VCL/CORO1A/ACTB/RARA/VIL1/CNN2/SLC2A1/SPTB/RHOQ/EFR3B/CROCC/SYNPO/DCTN4/CDC42EP3/DSTN/RND1/TRIP6/KLHL2/ABL1/RAPGEF3/…
BP	GO:0048285	organelle fission	371	0.350238	1.3979	0.00192955	0.0393841	0.0346294	2364	tags=20%, list=18%, signal=17%	DCN/PDGFRB/DMRT1/CCDC8/NUF2/PLK1/ASPM/MKI67/NEK2/WNT5A/NDC80/CCNA1/NCAPG/BRIP1/CENPF/AURKB/SYCE1L/KIF23/ANLN/KIF14/SPAG5/KIF2C/BUB1/CDCA2/FLNA/CNTD1/UBE2C/BIRC5/PRC1/IL1B/SYCE3/PDGFB/SPHK1/RPS6KA2/PDE3A/SPC24/FZR1/DLGAP5/NPR2/RGCC/TOP2A/CENPI/CCNB2/HSF2BP/PSMC3IP/NCAPG2/TENT4A/DAPK3/NCAPH/SLX4/TTK/CHFR/MYBL1/SPDL1/CCNB1/CEP85/CENPE/TMCC1/RMI1/CDK1/IGF2/HSPA2/KLHDC8B/ACTR3/KIF11/CCNE1/TUBG2/STAT2/…
BP	GO:0009611	response to wounding	406	0.342968	1.3804	0.00140306	0.0319961	0.0281333	1518	tags=20%, list=11%, signal=18%	MYL9/FAP/EMILIN1/PLAT/ENTPD1/EDNRA/VAV1/MMP2/DDR2/COL5A1/SLC1A3/IL10/GLI1/PDGFRA/FN1/WNT5A/DGKI/CD36/FGF1/GIP/FERMT2/ITGA5/ITGB3/CD40/SERPINE1/CSPG5/NOG/PTK7/FZD7/DPYSL3/DGKG/MFSD2B/MCAM/EPHB2/TNC/CCN2/FLNA/SYT11/PTPRS/EPPK1/ITGB6/CCR1/PEAR1/FBLN1/C1QTNF1/VASH1/FKBP10/WAS/TGFBR1/NFKBIZ/THBS1/ITGB1/PDGFB/DUOX2/NREP/AXL/PLAU/PAX6/SOX2/WNT7A/NFATC1/MAP1B/SRF/GPX1/RIPOR1/NPR2/TPM1/MORN4/AJUBA/TYRO3/A…
BP	GO:0007268	chemical synaptic transmission	385	0.343338	1.37369	0.00238541	0.0447588	0.0393552	1240	tags=17%, list=9%, signal=16%	CDH11/NPTX1/SRGN/PLAT/HTR3A/DYSF/SLC1A3/ADCY1/LAMA2/MAP1A/WNT5A/RAPSN/DGKI/SYT1/TSHZ3/GIP/KCNN1/KIF5A/NTF4/MCTP1/CSPG5/CYP46A1/NOG/CCL2/SLC4A8/CACNB2/CDH2/SLC18A2/SLC29A1/CACNB1/EPHB2/GHRL/SYT11/PTPRS/SNAP25/SNPH/VGF/DRD1/SYP/EFNB3/IL1B/NTSR1/KMO/STX11/ITGB1/CLN3/PLCG1/DVL1/PDLIM4/CTNNB1/SCTR/SLC6A9/RPS6KA2/DLG4/WNT7A/TMOD2/GPR176/MAP1B/SRF/S1PR2/STX2/RIMS3/NPR2/STX1A/HMGCR
BP	GO:0098916	anterograde trans-synaptic signaling	385	0.343338	1.37369	0.00238541	0.0447588	0.0393552	1240	tags=17%, list=9%, signal=16%	CDH11/NPTX1/SRGN/PLAT/HTR3A/DYSF/SLC1A3/ADCY1/LAMA2/MAP1A/WNT5A/RAPSN/DGKI/SYT1/TSHZ3/GIP/KCNN1/KIF5A/NTF4/MCTP1/CSPG5/CYP46A1/NOG/CCL2/SLC4A8/CACNB2/CDH2/SLC18A2/SLC29A1/CACNB1/EPHB2/GHRL/SYT11/PTPRS/SNAP25/SNPH/VGF/DRD1/SYP/EFNB3/IL1B/NTSR1/KMO/STX11/ITGB1/CLN3/PLCG1/DVL1/PDLIM4/CTNNB1/SCTR/SLC6A9/RPS6KA2/DLG4/WNT7A/TMOD2/GPR176/MAP1B/SRF/S1PR2/STX2/RIMS3/NPR2/STX1A/HMGCR
BP	GO:0099536	synaptic signaling	407	0.337992	1.35968	0.00283321	0.0490972	0.0431699	1240	tags=16%, list=9%, signal=15%	CDH11/NPTX1/SRGN/PLAT/HTR3A/DYSF/SLC1A3/ADCY1/LAMA2/MAP1A/WNT5A/RAPSN/DGKI/SYT1/TSHZ3/GIP/KCNN1/KIF5A/NTF4/MCTP1/CSPG5/CYP46A1/NOG/CCL2/SLC4A8/CACNB2/CDH2/SLC18A2/SLC29A1/CACNB1/EPHB2/GHRL/SYT11/PTPRS/SNAP25/SNPH/VGF/DRD1/SYP/EFNB3/IL1B/NTSR1/KMO/STX11/ITGB1/CLN3/PLCG1/DVL1/PDLIM4/CTNNB1/SCTR/CDK5R1/GNA15/SLC6A9/RPS6KA2/DLG4/WNT7A/TMOD2/GPR176/MAP1B/SRF/S1PR2/STX2/RIMS3/NPR2/STX1A/HMGCR
BP	GO:0030001	metal ion transport	491	-0.342911	-1.36341	0.00226765	0.043735	0.038455	1855	tags=23%, list=14%, signal=20%	SLC4A4/SLC9A5/DMD/CACNA2D3/TFRC/CRACR2B/PON3/SLC46A3/GSTO1/ISCU/SLC1A1/DDIT3/TMBIM6/WNK2/KCNH3/SLC23A2/SLC35G1/ITPR2/ATP1A1/TMEM38A/NEDD4/STK39/HPN/TESC/PLCG2/CABP4/KLHL3/ATP1B1/TCN2/STC1/GPR35/MICU3/LYN/PLCH1/HAP1/CXCR4/ATP7B/SLC12A8/RAMP1/FXN/AKAP6/CXCL10/HCRT/BSPRY/GLRX/CBARP/EDN3/BDKRB1/NIPAL1/FXYD2/STAC/KCNRG/TRPM8/ACE/LRRC26/KCNAB1/SLC40A1/FXYD3/SLC48A1/SLC5A9/CACNA1D/ADRB2/ATP2C2/AMIGO1/SL…
BP	GO:0005975	carbohydrate metabolic process	435	-0.348469	-1.37263	0.0020029	0.0401785	0.0353279	1991	tags=21%, list=15%, signal=19%	AKR7A2/GCLC/GPT2/COQ2/ST6GALNAC1/PTK2B/MST1/RORA/ST6GALNAC3/PDK2/PMM1/SLC4A4/ARL2/MPI/CHST2/PFKL/FUOM/DCXR/GDPGP1/GSTO1/OVGP1/PYGB/TKFC/PRKN/B4GALNT2/NHLRC1/SLC23A2/HEXB/MAN2A2/GLYCTK/FUT2/NDST2/SDHAF3/ST8SIA2/RGN/FABP5/TFF3/MAN1A1/GIT1/OMA1/KLB/UCP2/RORC/ALDH2/PDX1/INSR/ALDH1B1/UST/TREH/DHDH/IDNK/P2RY1/MLXIPL/GLB1L2/G6PC1/GK/GCKR/PLA2G4A/GALM/PPP1R3C/RBKS/PPP1R3E/MOGAT3/NPL/PDK4/GCNT4/SMPD3/SLC2…
BP	GO:0098655	monoatomic cation transmembrane transport	482	-0.35284	-1.39908	0.000841478	0.0234318	0.020603	1720	tags=22%, list=13%, signal=20%	SLC46A3/ATP5MC3/ATP6V0E2/GSTO1/ISCU/SLC1A1/DDIT3/TMBIM6/WNK2/KCNH3/SLC35G1/ITPR2/ATP1A1/TMEM38A/NEDD4/TMEM63A/STK39/ATP5PO/HPN/TESC/PLCG2/CABP4/ATP1B1/TCN2/GPR35/MICU3/LYN/PLCH1/HAP1/ATP7B/SLC12A8/FXN/AKAP6/CXCL10/UCP2/GLRX/CBARP/ATP8A1/SLC15A1/EDN3/BDKRB1/NIPAL1/FXYD2/STAC/KCNRG/TRPM8/LRRC26/KCNAB1/SLC40A1/FXYD3/CACNA1D/ATP2C2/AMIGO1/SLC28A3/KCNK5/AQP1/HTR2B/SLC12A2/SLC11A1/SLC15A2/BHLHA15/PDE4B…
BP	GO:0050801	monoatomic ion homeostasis	388	-0.363639	-1.41849	0.00105116	0.0261019	0.0229507	1855	tags=22%, list=14%, signal=19%	SLC4A4/SLC9A5/DMD/TNFSF11/TFRC/BOLA1/EDN2/ATP6V0E2/GSTO1/ISCU/SLC1A1/DDIT3/DISC1/TMBIM6/WNK2/MYC/SLC35G1/ITPR2/CNNM3/ATP1A1/TMEM38A/RAB38/BDH2/HEXB/STK39/PLCG2/RGN/KLHL3/ATP1B1/AQP11/STC1/MICU3/LYN/PLCH1/HAP1/ATP7B/SLC12A8/FXN/AKAP6/CXCL10/S100A14/TBXAS1/EDN3/BDKRB1/AGTR1/FXYD2/TRPM8/SLC40A1/ATP2C2/P2RY1/TMTC2/HTR2B/SLC12A2/SLC11A1/ANK3/RYR2/TFR2/ATP2A3/CNNM1/KCNJ2/TNNI3/PDK4/CYP4F2/TMPRSS3/CEMIP…
BP	GO:0006790	sulfur compound metabolic process	247	-0.389156	-1.45124	0.00262074	0.047261	0.0415553	2262	tags=28%, list=17%, signal=24%	CIAO2B/NAGLU/ABCD1/AKR1A1/OXSM/SLC7A11/BTD/SUCLG1/NDUFAB1/B4GALT4/GCLC/PDK2/BOLA1/LIAS/TST/SLC19A2/CHST2/ACSL5/ISCU/PAX8/NDOR1/IBA57/ABHD14B/ETHE1/HEXB/AHCYL2/NDST2/GSTP1/SUCLG2/B4GAT1/MPC2/NDNF/FXN/ACSS1/CBS/B3GNT3/BHMT2/MCEE/UST/SULT1C4/NUDT8/ACP3/NUDT7/SULT1E1/APIP/SULT2B1/HS6ST1/CTH/MAT1A/PDK4/HPSE/GGTLC2/GGT6/HS3ST1/SLC19A3/CHST4/SLC27A2/GHR/PIPOX/FMO3/ACSM2B/SULT1C2/ACSM3/DGAT2/GSTA1/CPS1/H…
BP	GO:0010038	response to metal ion	240	-0.391772	-1.45799	0.00227509	0.043758	0.0384752	1705	tags=21%, list=13%, signal=19%	INHBB/AKR1C3/SLC1A1/PRKN/ABAT/NEDD4/STK39/FOS/PLCG2/LGMN/ENTPD6/ATP7B/FXN/UCP2/PDX1/CAT/SLC40A1/CYP1A1/NFATC2/AQP1/NDRG1/SLC12A2/SLC11A1/ADGRV1/RASAL1/CD14/ANK3/RYR2/TFR2/RASA4/NQO1/SMPD3/CEBPA/AOC1/KCNMB3/TF/TNNC1/HAAO/KHK/ASS1/FBP1/TFF1/MTTP/CPS1/TTN/HMGCS2/CASR/OTC/MT1G/HAMP
BP	GO:0042886	amide transport	227	-0.396162	-1.46126	0.00260661	0.0471547	0.0414619	1806	tags=23%, list=13%, signal=20%	TNFSF11/JAK2/SLC19A2/SYBU/PFKL/INHBB/PAX8/SLC1A1/PRKN/ABAT/VSNL1/ABCA1/MPC2/HADH/UCP2/SIRT4/SSTR5/PDX1/SLC15A1/EDN3/KISS1/PLA2G6/CLTRN/SFRP1/IL1RN/AQP1/ILDR1/SLC15A2/NR1H4/AQP7/TFR2/SLC27A1/RAPGEF4/SMPD3/SLC2A2/GLTPD2/RBP4/CHRM3/ANO1/CDH17/FAM3D/FFAR4/NTRK2/SLC3A1/CFTR/GAL/NR0B2/FAM3B/MTTP/ADRA2A/CASR/CA2
BP	GO:0009914	hormone transport	208	-0.403239	-1.47557	0.00195087	0.0394741	0.0347085	1806	tags=25%, list=13%, signal=22%	TNFSF11/JAK2/SYBU/FZD4/PFKL/INHBB/PAX8/PRKN/ABAT/VSNL1/SLC22A9/MPC2/CRYM/LYN/HADH/UCP2/SIRT4/SSTR5/PDX1/EDN3/AGTR1/PPARG/KISS1/PLA2G6/P2RY1/CLTRN/SFRP1/IL1RN/AQP1/ILDR1/NR1H4/SLCO1B1/SLCO4A1/TFR2/SPP1/RAPGEF4/SMPD3/SLC2A2/RBP4/CHRM3/SERPINA7/SLC17A4/AGT/ANO1/FAM3D/FFAR4/CFTR/GAL/NR0B2/FAM3B/ADRA2A/CASR
BP	GO:0051047	positive regulation of secretion	209	-0.405821	-1.48811	0.00195087	0.0394741	0.0347085	1326	tags=19%, list=10%, signal=18%	ADAM8/MPC2/PARD6A/OXTR/PDX1/EDN3/SYK/PPARG/KISS1/PLA2G6/P2RY1/PLA2G4A/AQP1/ILDR1/CADPS2/SCIN/SLC12A2/TLR2/NR1H4/TFR2/TNFRSF11A/SPP1/RAPGEF4/SMPD3/SLC2A2/ANG/CYP4F2/RBP4/PTAFR/CHRM3/CADPS/ANO1/FFAR4/ABCG1/CFTR/GAL/CYP4A11/NR0B2/TTN/CASR
MF	GO:1901702	salt transmembrane transporter activity	283	-0.39517	-1.49735	0.000631774	0.0193993	0.0170573	1095	tags=18%, list=8%, signal=17%	SLC26A9/UCP2/CLIC5/SLC7A2/TRPM8/LRRC26/KCNAB1/FXYD3/SLC5A9/CACNA1D/ATP2C2/SLC28A3/KCNK5/AQP1/SLC16A11/SLC12A2/GABRP/ANXA9/AQP5/AQP7/RYR2/ATP2A3/SLC6A14/CLCN2/KCNJ2/TRPV3/SLC26A1/SLC17A9/CLCA4/KCNMB3/SCN3B/SLC17A4/ANO1/SLC9A2/SLC39A5/KCNK7/SLC23A1/ANO5/ASIC1/GRIN2A/GRIN2B/TSPO2/CFTR/SLC6A20/SLC44A5/KCNF1/SLC28A1/KCNE3/SLC5A1/SLC9A4/KCNK17/SLC26A3
CC	GO:0009925	basal plasma membrane	190	-0.421259	-1.52093	0.000995439	0.0254945	0.0224167	1582	tags=22%, list=12%, signal=19%	SLC23A2/ATP1A1/SLC22A9/ERBB3/STK39/ABCA1/ATP1B1/ATP7B/CA9/ACE/SLC40A1/ATP2C2/P2RY1/AQP1/SPEF1/SLC12A2/AQP5/SLCO1B1/ANK3/AQP7/CEACAM1/SLC27A1/CDH16/SLC26A1/CHRM3/SLC22A7/TF/CA14/LIN7A/SLC39A5/CDH17/CD1D/SLC23A1/VSIG1/SLCO2B1/MTTP/CEACAM5/ADRA2A/MYO1A/CASR/SLC9A4
BP	GO:0046486	glycerolipid metabolic process	297	-0.399548	-1.52243	0.000286617	0.0104511	0.00918935	1379	tags=16%, list=10%, signal=15%	LIPE/PLCG2/RGN/UVRAG/FABP5/DGKB/PIK3C2B/PIGP/PEMT/PIK3R1/NR1H3/CAT/PLA2G6/CHPT1/G6PC1/GK/PLA2G4A/HTR2B/NR1H4/MOGAT3/SLC27A1/PLD1/INPP5J/PLAAT3/ANG/PLAAT4/PLIN5/GPAT3/MOGAT1/APOBEC1/PLA2G7/GALR2/AADAC/APOH/APOA2/LIPC/PLAAT2/CIDEC/DGAT2/GPD1/SLC44A5/MTTP/PIP5K1B/PLA2G4C/CPS1/PCK1/APOC3/APOA1/PLA2G2A
BP	GO:0006633	fatty acid biosynthetic process	112	-0.456215	-1.53524	0.00286673	0.0495554	0.0435727	1770	tags=27%, list=13%, signal=23%	EDN2/LIAS/AKR1C3/ABHD3/PECR/GSTP1/RGN/FABP5/ACSS1/NR1H3/TBXAS1/ASAH2/HACD4/CYP1A1/MLXIPL/PLA2G4A/FA2H/CEACAM1/THNSL2/CYP2C9/PDK4/OLAH/ACSM2B/LIPC/ACSM3/CYP2C8/CYP2E1/APOC3/ACSM2A/CYP3A4
CC	GO:0016323	basolateral plasma membrane	165	-0.436161	-1.54562	0.00137685	0.0316044	0.0277889	1582	tags=21%, list=12%, signal=19%	SLC23A2/ATP1A1/SLC22A9/ERBB3/STK39/ABCA1/ATP1B1/ATP7B/CA9/SLC40A1/ATP2C2/P2RY1/AQP1/SPEF1/SLC12A2/SLCO1B1/ANK3/AQP7/CDH16/SLC26A1/CHRM3/SLC22A7/CA14/LIN7A/SLC39A5/CDH17/CD1D/VSIG1/SLCO2B1/MTTP/CEACAM5/ADRA2A/MYO1A/CASR/SLC9A4
BP	GO:0090087	regulation of peptide transport	136	-0.448031	-1.5481	0.0023281	0.0444137	0.0390517	1806	tags=24%, list=13%, signal=21%	TNFSF11/JAK2/SYBU/PFKL/INHBB/PAX8/PRKN/ABAT/VSNL1/MPC2/HADH/UCP2/SIRT4/SSTR5/PDX1/KISS1/PLA2G6/SFRP1/ILDR1/NR1H4/TFR2/RAPGEF4/SLC2A2/RBP4/CHRM3/ANO1/FAM3D/FFAR4/CFTR/NR0B2/ADRA2A/CASR/CA2
MF	GO:0042277	peptide binding	161	-0.439089	-1.54904	0.00135306	0.0311605	0.0273986	1227	tags=20%, list=9%, signal=18%	RAMP1/OXTR/PIK3R1/SSTR5/CRYAB/BDKRB1/INSR/SLC40A1/PPARG/ADRB2/TLR1/TLR2/VIPR1/SSTR1/PTH2R/BCHE/ANPEP/ANG/CEMIP/GSAP/MME/CLU/CD1D/FFAR4/GRIN2A/GRIN2B/GALR2/GHR/PRLR/ITM2A/SLC7A9/APOA1
MF	GO:0016829	lyase activity	147	-0.443615	-1.55171	0.00178693	0.0370128	0.0325444	2225	tags=30%, list=16%, signal=25%	ILVBL/ARMT1/PAICS/NTHL1/ECHS1/PHYKPL/CENPV/MGST2/RPS3/GAD1/AUH/HACL1/DGLUCY/GUCY1A1/TKFC/PCBD1/TYW1B/CA13/EHHADH/GUCY1B1/CA3/CA9/CA5B/MOCS1/CBS/TBXAS1/HACD4/CYP2S1/CYP1A1/GMDS/APIP/ACMSD/CTH/CLYBL/GLDC/NPL/CA14/ALDOB/HOGA1/BST1/RNASE1/DDC/PCK1/CA2
BP	GO:0030072	peptide hormone secretion	165	-0.438524	-1.554	0.00114601	0.0280531	0.0246663	1806	tags=24%, list=13%, signal=21%	TNFSF11/JAK2/SYBU/PFKL/INHBB/PAX8/PRKN/ABAT/VSNL1/MPC2/HADH/UCP2/SIRT4/SSTR5/PDX1/EDN3/KISS1/PLA2G6/CLTRN/SFRP1/IL1RN/AQP1/ILDR1/NR1H4/TFR2/RAPGEF4/SMPD3/SLC2A2/RBP4/CHRM3/ANO1/FAM3D/FFAR4/CFTR/GAL/NR0B2/FAM3B/ADRA2A/CASR
BP	GO:0002790	peptide secretion	168	-0.439752	-1.55877	0.00259648	0.0471547	0.0414619	1806	tags=24%, list=13%, signal=21%	TNFSF11/JAK2/SYBU/PFKL/INHBB/PAX8/PRKN/ABAT/VSNL1/ABCA1/MPC2/HADH/UCP2/SIRT4/SSTR5/PDX1/EDN3/KISS1/PLA2G6/CLTRN/SFRP1/IL1RN/AQP1/ILDR1/NR1H4/TFR2/RAPGEF4/SMPD3/SLC2A2/RBP4/CHRM3/ANO1/FAM3D/FFAR4/CFTR/GAL/NR0B2/FAM3B/ADRA2A/CASR
BP	GO:0006813	potassium ion transport	110	-0.464493	-1.55882	0.00263949	0.047261	0.0415553	2079	tags=37%, list=15%, signal=32%	CD63/KCNK1/KCNJ14/KCNH8/PTK2B/VAMP2/SLC9A5/KCNH3/ATP1A1/TMEM38A/NEDD4/STK39/HPN/ATP1B1/SLC12A8/AKAP6/HCRT/EDN3/FXYD2/KCNRG/LRRC26/KCNAB1/FXYD3/CACNA1D/AMIGO1/KCNK5/AQP1/SLC12A2/NOS1AP/ANK3/KCNJ2/KCNMB3/SLC9A2/KCNK7/GALR2/GAL/KCNF1/ADRA2A/KCNE3/SLC9A4/KCNK17
MF	GO:0052689	carboxylic ester hydrolase activity	105	-0.472972	-1.58031	0.00244469	0.0453986	0.0399177	1496	tags=21%, list=11%, signal=19%	ABHD3/NDST2/LIPE/RGN/ABHD11/ALDH2/PLA2G6/PLA2G4A/BCHE/PLAAT3/PLAAT4/ASPG/CES2/PLA2G7/AADAC/LIPC/PLAAT2/PLA2G12B/CES3/PLA2G4C/CA2/PLA2G2A
BP	GO:0032409	regulation of transporter activity	149	-0.455889	-1.59626	0.000968917	0.0249676	0.0219533	1673	tags=30%, list=12%, signal=27%	BCL2/PTK2B/VAMP2/DMD/GSTO1/WNK2/NEDD4/STK39/TESC/CABP4/ATP1B1/GPR35/HAP1/AKAP6/NR1H3/GLRX/CBARP/FXYD2/STAC/KCNRG/LRRC26/KCNAB1/FXYD3/CACNA1D/PPARG/ADRB2/CLTRN/PDE4B/NOS1AP/ANK3/CTSS/RYR2/SGK2/CHRM3/SCN3B/FGF14/GALR2/CFTR/GAL/APOA2/ACE2/ADRA2A/STRIT1/KCNE3/RELN
BP	GO:0009617	response to bacterium	382	-0.410481	-1.59831	8.10911e-06	0.000649772	0.000571327	1446	tags=22%, list=11%, signal=20%	DUSP10/FOS/ABCA1/GSTP1/PLCG2/IFI44/OAS3/LYN/LRG1/GIT1/TENT5A/CA3/GCH1/DHX58/LGALS9/CA5B/C4BPB/H2BC6/CXCL10/OAS2/NR1H3/S100A14/NR4A1/AKAP12/BDKRB1/ACE/IRF5/SYK/GSDMB/PLAC8/CYP1A1/PLA2G6/ACP5/CMPK2/PF4/KLK7/THBD/AQP1/FCER1G/RNASE7/SLC11A1/LRAT/CASP1/SPINK5/TLR1/TLR2/PDE4B/NR1H4/LYG1/C4BPA/CD14/LEAP2/CARD16/NQO1/TLR3/CCL20/TNFRSF11A/HERC6/UPK1B/PLAAT3/CLEC4E/ANG/PTAFR/TF/OAS1/CD1D/FGFR2/REG3A/IRF8/A…
MF	GO:0005342	organic acid transmembrane transporter activity	106	-0.478423	-1.60083	0.0024843	0.0456499	0.0401387	1857	tags=28%, list=14%, signal=25%	SLC16A13/SFXN5/SLC19A2/SFXN2/SLC1A1/SLC23A2/SLC22A9/MPC2/SLC26A9/UCP2/SLC7A2/SLC16A11/SLCO1B1/ABCC2/CEACAM1/SLC6A14/SLC27A1/SLC26A1/SLC22A7/SLC23A1/SLC3A1/SLC27A2/TSPO2/SLC25A21/SLC43A1/SLC38A11/SLC6A20/SLC7A9/AKR1C4/SLC26A3
CC	GO:0005759	mitochondrial matrix	434	-0.406341	-1.60208	4.02764e-06	0.000381047	0.000335044	4187	tags=47%, list=31%, signal=34%	MRPS22/MLYCD/MRPS33/PMPCB/FARS2/GCDH/FDX2/SOD1/MRPS25/SIRT5/ACADM/PNPT1/NUDT9/PYCR1/DAP3/HSD17B10/TUFM/MRPS2/TXN2/MMAB/ACOT11/TRMT5/FH/AURKAIP1/MTHFD2L/RPUSD4/PITRM1/MRPL15/ISCA1/MCAT/YARS2/HMGCL/MMAA/MRPS7/MCCC1/MRPS26/ISCA2/MRPL27/MRPS23/MRPS9/MRPS28/ATP5PB/ACAT1/FASTKD2/SIRT3/MRPL21/MRPL54/AADAT/HAX1/MRPL34/MRPS15/MRPL4/CLPX/MRPL42/MRPL16/PTCD1/GUF1/FASTKD3/MRPL48/PPTC7/CLPP/NDUFS2/MRPL22/MRPL…
MF	GO:0046943	carboxylic acid transmembrane transporter activity	105	-0.480532	-1.60557	0.00159695	0.034507	0.0303411	1857	tags=29%, list=14%, signal=25%	SLC16A13/SFXN5/SLC19A2/SFXN2/SLC1A1/SLC23A2/SLC22A9/MPC2/SLC26A9/UCP2/SLC7A2/SLC16A11/SLCO1B1/ABCC2/CEACAM1/SLC6A14/SLC27A1/SLC26A1/SLC22A7/SLC23A1/SLC3A1/SLC27A2/TSPO2/SLC25A21/SLC43A1/SLC38A11/SLC6A20/SLC7A9/AKR1C4/SLC26A3
BP	GO:0072329	monocarboxylic acid catabolic process	111	-0.481921	-1.616	0.0014559	0.0328799	0.0289104	2288	tags=39%, list=17%, signal=32%	ACOX2/ETFA/ABCD1/SCP2/ILVBL/XYLB/AKR1A1/AIG1/DECR1/ECHS1/AUH/HACL1/DCXR/ETFB/CPT2/BDH2/HEXB/ABHD3/PHYH/ECI1/CRYL1/ACADS/EHHADH/HADH/MCEE/NUDT8/IDNK/NUDT7/CYP4F3/CYP4F2/PLIN5/ACOXL/FABP1/SLC27A2/HAO1/CYP4F12/HOGA1/AGXT2/CYP4A11/LDHD/AKR1D1/PCK1/SULT2A1
BP	GO:1902652	secondary alcohol metabolic process	113	-0.480491	-1.61764	0.00103617	0.025908	0.0227802	963	tags=18%, list=7%, signal=17%	FMO5/CAT/SULT2B1/UGT1A4/EPHX2/NR1H4/CYP2C9/CEBPA/ANGPTL3/ABCG1/CFTR/APOA2/LIPC/NR0B2/CYP27A1/AKR1D1/HMGCS2/APOA1/SULT2A1/CYP3A4
BP	GO:0008203	cholesterol metabolic process	104	-0.48661	-1.62578	0.00147254	0.0329369	0.0289605	963	tags=18%, list=7%, signal=17%	FMO5/CAT/SULT2B1/EPHX2/NR1H4/CYP2C9/CEBPA/ANGPTL3/ABCG1/CFTR/APOA2/LIPC/NR0B2/CYP27A1/AKR1D1/HMGCS2/APOA1/SULT2A1/CYP3A4
CC	GO:0045177	apical part of cell	313	-0.425163	-1.62983	2.5567e-05	0.00159817	0.00140523	1751	tags=28%, list=13%, signal=25%	AJM1/HSP90AA1/MYL12B/IL6R/EPB41L4B/SLC1A1/MTCL1/SLC23A2/SORBS2/ATP1A1/BST2/ERBB3/STK39/LHFPL5/SHROOM3/EMP2/CLCN5/HPN/LGMN/ATP1B1/IFIT5/STC1/PARD6A/OXTR/SAPCD2/DPP4/SLC26A9/MAL2/INSC/CLIC5/SLC15A1/MUC1/EDA/ADRB2/KISS1/ACP3/P2RY1/ABCG8/AQP1/SPEF1/SLC12A2/PARD3B/SLC15A2/AQP5/ABCC2/CEACAM1/SLC6A14/SLC47A2/AMN/PLD1/UPK1B/SLC2A2/EDAR/CLCA4/PTPRH/CYP4F2/SLC22A7/SLC17A4/TF/MYO7A/CA14/FABP1/ANO1/SLC9A2/SL…
BP	GO:0016125	sterol metabolic process	113	-0.484854	-1.63233	0.000837233	0.0234318	0.020603	963	tags=18%, list=7%, signal=17%	FMO5/CAT/SULT2B1/EPHX2/NR1H4/CYP8B1/CYP2C9/CEBPA/ANGPTL3/ABCG1/CFTR/APOA2/LIPC/NR0B2/CYP27A1/AKR1D1/HMGCS2/APOA1/SULT2A1/CYP3A4
BP	GO:0044283	small molecule biosynthetic process	453	-0.413086	-1.63299	1.41799e-06	0.00016081	0.000141396	2312	tags=28%, list=17%, signal=24%	INSIG2/IPMK/ALDH8A1/ACOX2/ABCD1/SCP2/ILVBL/UCKL1/AKR1A1/OXSM/NDUFAB1/FGF19/SERINC5/ADA2/OSBPL7/APRT/KYNU/WNT4/GLUL/CBR1/GPT2/COQ2/PTK2B/MST1/PDK2/CYP39A1/MGST2/PYCARD/GAD1/TK1/EDN2/LIAS/SLC19A2/OSBPL6/SEPHS2/AKR1C3/ABAT/ABHD3/PCBD1/OAT/SDHAF3/PECR/GSTP1/PLCG2/RGN/FABP5/SRD5A3/ALDH1A2/DHFR/DHRS9/GCH1/ACSS1/SPTSSB/GAMT/GLS2/CYP7B1/NR1H3/CBS/TBXAS1/ASAH2/BHMT2/HACD4/SYK/UST/CYP1A1/CARNS1/P2RY1/MLXIP…
MF	GO:0016298	lipase activity	82	-0.501549	-1.63572	0.00197068	0.0396938	0.0349016	877	tags=27%, list=6%, signal=25%	ABHD3/LIPE/PLCG2/PLCH1/PLA2G6/BDKRB2/PLA2G4A/PLD1/PLAAT3/SMPD3/PLAAT4/ASPG/CHRM3/PLA2G7/AADAC/LIPC/PLAAT2/PLA2G12B/PLBD1/PLA2G4C/CASR/PLA2G2A
BP	GO:0006631	fatty acid metabolic process	289	-0.430608	-1.63728	2.839e-05	0.00174349	0.00153301	2312	tags=32%, list=17%, signal=27%	INSIG2/ACOX2/HPGD/ETFA/ABCD1/SCP2/ILVBL/CYGB/OXSM/NDUFAB1/AIG1/DECR1/ECHS1/CBR1/PDK2/PTGR1/AUH/HACL1/EDN2/LIAS/ALKBH7/ACSL5/ETFB/AKR1C3/CPT2/BDH2/FMO4/ABHD3/PHYH/PECR/GSTP1/ECI1/RGN/FABP5/CRYL1/ACADS/EHHADH/HADH/ACSS1/NR1H3/TBXAS1/SIRT4/ACADSB/ALDH3A2/ASAH2/FAAH2/HACD4/MCEE/CYP2S1/PPARG/CYP1A1/NUDT8/NUDT7/MLXIPL/PLA2G4A/FA2H/CYP4F3/CEACAM1/CYP2C18/THNSL2/SLC27A1/CYP2C9/PDK4/CYP4F2/PPARGC1A/CYP4F1…
BP	GO:0009410	response to xenobiotic stimulus	290	-0.432368	-1.64258	1.22575e-05	0.000875659	0.000769943	1673	tags=25%, list=12%, signal=22%	GSTO1/SLC1A1/MYC/NAT1/ABAT/ATP1A1/FMO4/FOS/ABCA1/GSTP1/LYN/CXCR4/HADH/CA9/OXTR/RAD54B/UGT2B11/RORC/PDX1/ACE/FMO5/CAT/CYP2S1/CYP1A1/SULT1C4/SLC28A3/ABCG8/NFATC2/SFRP1/HTR2B/UGT2B17/C1orf115/PDE4B/CMBL/SLCO1B1/CYP3A5/ABCC2/CYP2C18/NQO1/TLR3/UGT2B28/CYP2C9/BCHE/CYP4F2/AOX1/NAT2/CES2/SLC22A7/ALDH3A1/CYP2C19/NR1I2/GRIN2A/CYP4F12/ASS1/AADAC/FBP1/GAL/ACSM2B/APOA2/CYP2C8/CES3/SLCO2B1/GSTA1/CYP2E1/CYP3A7/…
BP	GO:0015833	peptide transport	179	-0.458431	-1.64882	0.00014318	0.00630443	0.00554332	1806	tags=25%, list=13%, signal=22%	TNFSF11/JAK2/SYBU/PFKL/INHBB/PAX8/PRKN/ABAT/VSNL1/ABCA1/MPC2/HADH/UCP2/SIRT4/SSTR5/PDX1/SLC15A1/EDN3/KISS1/PLA2G6/CLTRN/SFRP1/IL1RN/AQP1/ILDR1/SLC15A2/NR1H4/TFR2/RAPGEF4/SMPD3/SLC2A2/RBP4/CHRM3/ANO1/CDH17/FAM3D/FFAR4/CFTR/GAL/NR0B2/FAM3B/ADRA2A/CASR/CA2
BP	GO:0033865	nucleoside bisphosphate metabolic process	93	-0.502066	-1.64889	0.00128453	0.0299496	0.0263339	2236	tags=29%, list=17%, signal=24%	ABCD1/OXSM/SUCLG1/PDK2/PANK1/DCAKD/ACSL5/ABHD14B/SUCLG2/MPC2/ACSS1/MCEE/SULT1C4/NUDT8/NUDT7/VNN1/SULT1E1/SULT2B1/PDK4/SLC27A2/PIPOX/ACSM2B/ACSM3/DGAT2/HMGCS2/ACSM2A/SULT2A1
BP	GO:0033875	ribonucleoside bisphosphate metabolic process	93	-0.502066	-1.64889	0.00128453	0.0299496	0.0263339	2236	tags=29%, list=17%, signal=24%	ABCD1/OXSM/SUCLG1/PDK2/PANK1/DCAKD/ACSL5/ABHD14B/SUCLG2/MPC2/ACSS1/MCEE/SULT1C4/NUDT8/NUDT7/VNN1/SULT1E1/SULT2B1/PDK4/SLC27A2/PIPOX/ACSM2B/ACSM3/DGAT2/HMGCS2/ACSM2A/SULT2A1
BP	GO:0034032	purine nucleoside bisphosphate metabolic process	93	-0.502066	-1.64889	0.00128453	0.0299496	0.0263339	2236	tags=29%, list=17%, signal=24%	ABCD1/OXSM/SUCLG1/PDK2/PANK1/DCAKD/ACSL5/ABHD14B/SUCLG2/MPC2/ACSS1/MCEE/SULT1C4/NUDT8/NUDT7/VNN1/SULT1E1/SULT2B1/PDK4/SLC27A2/PIPOX/ACSM2B/ACSM3/DGAT2/HMGCS2/ACSM2A/SULT2A1
BP	GO:0015908	fatty acid transport	74	-0.521151	-1.6595	0.000935347	0.0246303	0.0216568	968	tags=26%, list=7%, signal=24%	ACE/SYK/PPARG/BDKRB2/PLA2G4A/SLCO1B1/SLCO4A1/SLC27A1/TNFRSF11A/CYP4F2/SLC22A7/FABP1/FABP6/SLC27A2/CYP4A11/PLA2G12B/SLCO2B1/PLA2G2A/RBP2
CC	GO:0016324	apical plasma membrane	262	-0.44233	-1.66509	1.6441e-05	0.00111751	0.000982597	1751	tags=29%, list=13%, signal=26%	AJM1/HSP90AA1/IL6R/SLC1A1/MTCL1/SLC23A2/SORBS2/ATP1A1/BST2/ERBB3/STK39/LHFPL5/SHROOM3/EMP2/HPN/ATP1B1/STC1/PARD6A/OXTR/SAPCD2/DPP4/SLC26A9/MAL2/CLIC5/SLC15A1/MUC1/ADRB2/KISS1/P2RY1/ABCG8/AQP1/SPEF1/SLC12A2/PARD3B/SLC15A2/AQP5/ABCC2/CEACAM1/SLC6A14/SLC47A2/AMN/PLD1/UPK1B/SLC2A2/CLCA4/PTPRH/CYP4F2/SLC22A7/SLC17A4/TF/MYO7A/CA14/ANO1/SLC9A2/SLC23A1/SLC3A1/CYP4F12/SLC43A1/CFTR/CYP4A11/SLC6A20/ACE2/CEA…
BP	GO:0072330	monocarboxylic acid biosynthetic process	161	-0.473083	-1.66897	0.000166652	0.00729206	0.00641171	2312	tags=35%, list=17%, signal=29%	INSIG2/ALDH8A1/ACOX2/ABCD1/SCP2/OXSM/NDUFAB1/FGF19/OSBPL7/CBR1/CYP39A1/EDN2/LIAS/OSBPL6/AKR1C3/ABHD3/PECR/GSTP1/RGN/FABP5/ALDH1A2/DHRS9/ACSS1/GAMT/CYP7B1/NR1H3/TBXAS1/ASAH2/HACD4/UST/CYP1A1/MLXIPL/PLA2G4A/ACMSD/NR1H4/FA2H/CEACAM1/THNSL2/CYP8B1/CYP2C9/PDK4/OLAH/GATM/SLC27A2/HOGA1/ACSM2B/LIPC/ACSM3/CYP2C8/CYP27A1/CYP2E1/AKR1D1/AKR1C4/APOC3/ACSM2A/CYP3A4
MF	GO:0031406	carboxylic acid binding	126	-0.491105	-1.67531	0.000403518	0.0137137	0.0120581	1423	tags=24%, list=11%, signal=21%	PHYH/GSTP1/ST8SIA2/DDAH1/FABP5/DHFR/PPARG/SELL/LRAT/NR1H4/THNSL2/GLDC/AMBP/CYP4F11/ACOXL/ALB/FABP1/FABP6/TM4SF5/FFAR4/GRIN2B/ASS1/GSTA1/CPS1/AKR1C4/PCK1/CD22/CASR/OTC/RBP2
BP	GO:0006869	lipid transport	308	-0.439283	-1.67739	4.0873e-06	0.000381536	0.000335475	2397	tags=31%, list=18%, signal=26%	CAV1/PRELID2/LDLRAP1/ABCB1/PITPNC1/SAR1B/ATG9A/ABCD1/SCP2/P2RX4/ABCG5/FIS1/TEX2/FGF19/YJEFN3/SPNS1/SLC25A20/OSBPL7/PLSCR1/APOO/PRELID1/ABCA5/ATP8B1/TNFSF11/GULP1/ACSL5/FZD4/OSBPL6/PRKN/CPT2/STARD10/SLC22A9/LIMA1/ABCA1/FABP5/STARD5/SPNS3/XKR9/NR1H3/GRAMD1B/ATP8A1/APOLD1/AGTR1/ACE/SYK/PPARG/APOL6/TTPA/BDKRB2/ABCG8/PLA2G4A/LRAT/SLCO1B1/ABCC2/SLCO4A1/CEACAM1/ABCA9/ATG9B/SLC27A1/TNFRSF11A/ATP10B/CYP8B…
MF	GO:0042626	ATPase-coupled transmembrane transporter activity	62	-0.540776	-1.67865	0.00242634	0.0451777	0.0397235	2879	tags=37%, list=21%, signal=29%	ABCC4/ATP6V0B/ABCC10/ATP6V0E1/ABCB1/ABCD1/ABCG5/ATP5F1B/TOMM20/ABCA5/ATP6V0E2/ATP1A1/ABCA1/ATP7B/ATP8A1/ATP2C2/ABCG8/ABCC2/ABCA9/ATP2A3/ABCG1/CFTR/ATP13A4
MF	GO:0005506	iron ion binding	107	-0.502427	-1.67996	0.000964627	0.0249676	0.0219533	1200	tags=26%, list=9%, signal=24%	FXN/CYP7B1/TBXAS1/CYP2S1/CYP1A1/ACP5/CYP4X1/FA2H/CYP3A5/CYP4F3/CYP2C18/CYP8B1/CYP2C9/CYP4F2/AOX1/CYP4F11/TF/CYP2C19/HAAO/CYP4F12/CYP4A11/CYP2C8/BBOX1/CYP27A1/CYP2E1/CYP3A7/PAH/CYP3A4
BP	GO:0010876	lipid localization	347	-0.435094	-1.68104	1.62362e-06	0.000177609	0.000156166	2412	tags=29%, list=18%, signal=25%	CDS1/CAV1/PRELID2/LDLRAP1/ABCB1/PITPNC1/SAR1B/ATG9A/ABCD1/SCP2/P2RX4/ABCG5/FIS1/TEX2/FGF19/YJEFN3/SPNS1/SLC25A20/OSBPL7/PLSCR1/APOO/PRELID1/ABCA5/ATP8B1/TNFSF11/GULP1/ALKBH7/ACSL5/FZD4/OSBPL6/PRKN/CPT2/STARD10/SLC22A9/HEXB/LIMA1/ABCA1/FABP5/STARD5/SPNS3/XKR9/NR1H3/GRAMD1B/ATP8A1/APOLD1/AGTR1/ACE/SYK/PPARG/APOL6/TTPA/BDKRB2/ABCG8/PLA2G4A/LRAT/SLCO1B1/ABCC2/SLCO4A1/CEACAM1/ABCA9/ATG9B/SLC27A1/TNFRS…
BP	GO:0033559	unsaturated fatty acid metabolic process	76	-0.522988	-1.68121	0.00197306	0.0396938	0.0349016	1407	tags=37%, list=10%, signal=33%	HPGD/ABCD1/SCP2/CBR1/PTGR1/EDN2/AKR1C3/GSTP1/FABP5/TBXAS1/FAAH2/CYP2S1/CYP1A1/PLA2G4A/CYP4F3/CYP2C18/CYP2C9/CYP4F2/CYP4F11/CES2/CYP2C19/CYP4F12/CYP4A11/CYP2C8/GSTA1/CYP2E1/PLA2G4C/AKR1C4
BP	GO:0006959	humoral immune response	109	-0.500765	-1.68157	0.000877448	0.023814	0.020939	1141	tags=26%, list=8%, signal=24%	C4BPB/IL7/H2BC6/A2M/CXCL10/PLA2G6/PF4/KLK7/BLNK/RNASE7/SLC11A1/SPINK5/C4BPA/LEAP2/C8G/SPNS2/ANG/TF/C8A/CLU/REG3A/HPX/PRSS3/BST1/PPBP/C6/LYZ/PGC
MF	GO:0004620	phospholipase activity	68	-0.541483	-1.69325	0.00117826	0.0284448	0.0250107	877	tags=25%, list=6%, signal=23%	PLA2G6/BDKRB2/PLA2G4A/PLD1/PLAAT3/SMPD3/PLAAT4/ASPG/CHRM3/PLA2G7/LIPC/PLAAT2/PLA2G12B/PLBD1/PLA2G4C/CASR/PLA2G2A
BP	GO:0055088	lipid homeostasis	122	-0.498775	-1.6933	0.000227776	0.0088938	0.00782008	1471	tags=34%, list=11%, signal=30%	CAV1/LDLRAP1/SAR1B/ACOX2/ABCD1/ABCG5/TLCD4/RORA/CYP39A1/ABCA5/MALL/PNPLA4/LIMA1/ABCA1/TLCD1/CYP7B1/NR1H3/GRAMD1B/PPARG/MLXIPL/G6PC1/ABCG8/GCKR/EPHX2/NR1H4/MYLIP/CEBPA/ANGPTL3/ACOXL/ABCG1/ANGPTL8/APOA2/LIPC/ACSM3/PLA2G12B/DGAT2/MTTP/TM6SF2/APOC3/ACSM2A/APOA1
BP	GO:1901607	alpha-amino acid biosynthetic process	58	-0.553197	-1.69426	0.00274185	0.0481095	0.0423014	2665	tags=40%, list=20%, signal=32%	SHMT2/NAGS/PCBD2/PARK7/PSAT1/ILVBL/SERINC5/GLUL/SEPHS2/PCBD1/OAT/DHFR/GLS2/CBS/BHMT2/APIP/CTH/HAO1/ASS1/AGXT2/CPS1/PAH/OTC
MF	GO:0043177	organic acid binding	127	-0.496059	-1.69526	0.000378255	0.0130452	0.0114703	1423	tags=24%, list=11%, signal=22%	PHYH/GSTP1/ST8SIA2/DDAH1/FABP5/DHFR/PPARG/SELL/LRAT/NR1H4/RYR2/THNSL2/GLDC/AMBP/CYP4F11/ACOXL/ALB/FABP1/FABP6/TM4SF5/FFAR4/GRIN2B/ASS1/GSTA1/CPS1/AKR1C4/PCK1/CD22/CASR/OTC/RBP2
MF	GO:0016705	oxidoreductase activity, acting on paired donors, with incorporation or reduction of molecular oxygen	132	-0.493479	-1.6971	0.000208718	0.00839791	0.00738405	1509	tags=23%, list=11%, signal=21%	FMO4/PCBD1/PHYH/ALKBH2/CYP7B1/TBXAS1/FMO5/CYP2S1/CYP1A1/CYP4X1/CYP3A5/CYP4F3/CYP2C18/CYP8B1/CYP2C9/CYP4F2/CYP4F11/CYP2C19/CYP4F12/FMO3/CYP4A11/CYP2C8/BBOX1/CYP27A1/DEGS2/CYP2E1/CYP3A7/AKR1D1/PAH/AKR1C4/CYP3A4
BP	GO:0015849	organic acid transport	217	-0.461659	-1.70161	3.59816e-05	0.00206482	0.00181554	1095	tags=20%, list=8%, signal=19%	SLC26A9/UCP2/SLC7A2/ACE/SYK/PPARG/BDKRB2/CLTRN/PLA2G4A/SLC16A11/SLC12A2/SLC11A1/SLCO1B1/ABCC2/SLCO4A1/CEACAM1/SLC6A14/SLC27A1/TNFRSF11A/SLC26A1/CYP4F2/SLC22A7/FABP1/FABP6/SLC23A1/NTRK2/SLC3A1/SLC27A2/TSPO2/SLC25A21/SLC43A1/SLC38A11/CYP4A11/SLC6A20/NR0B2/PLA2G12B/ACE2/SLCO2B1/SLC7A9/AKR1C4/CASR/PLA2G2A/RBP2/SLC26A3
BP	GO:0046942	carboxylic acid transport	216	-0.462554	-1.70432	1.03796e-05	0.000773061	0.000679731	1095	tags=20%, list=8%, signal=19%	SLC26A9/UCP2/SLC7A2/ACE/SYK/PPARG/BDKRB2/CLTRN/PLA2G4A/SLC16A11/SLC12A2/SLC11A1/SLCO1B1/ABCC2/SLCO4A1/CEACAM1/SLC6A14/SLC27A1/TNFRSF11A/SLC26A1/CYP4F2/SLC22A7/FABP1/FABP6/SLC23A1/NTRK2/SLC3A1/SLC27A2/TSPO2/SLC25A21/SLC43A1/SLC38A11/CYP4A11/SLC6A20/NR0B2/PLA2G12B/ACE2/SLCO2B1/SLC7A9/AKR1C4/CASR/PLA2G2A/RBP2/SLC26A3
BP	GO:0044242	cellular lipid catabolic process	173	-0.477082	-1.70577	4.36766e-05	0.00238658	0.00209846	2288	tags=35%, list=17%, signal=29%	ACOX2/SMPD2/PRDX6/NAGLU/ETFA/ABCD1/SCP2/ILVBL/AIG1/DECR1/ECHS1/GDPD3/MGST2/AUH/HACL1/PNPLA4/ETFB/AKR1C3/CPT2/BDH2/HEXB/ABHD3/PHYH/ECI1/LIPE/PLCG2/SRD5A3/ACADS/EHHADH/HADH/ASAH2/BCO2/MCEE/PLA2G6/NUDT8/NUDT7/PLA2G4A/BCO1/CYP4F3/PLD1/SMPD3/CYP4F2/PLIN5/ANGPTL3/ACOXL/FABP1/PLA2G7/SLC27A2/HAO1/CYP4F12/AADAC/APOA2/CYP4A11/LIPC/PLBD1/AKR1B10/PLA2G4C/CPS1/PCK1/APOC3
BP	GO:0007200	phospholipase C-activating G protein-coupled receptor signaling pathway	41	-0.598835	-1.71812	0.00264925	0.0473147	0.0416026	1299	tags=37%, list=10%, signal=33%	GPR35/HCRT/AGTR1/ADRA1D/P2RY1/HTR2B/FPR1/PTAFR/CHRM3/AGT/ANO1/FFAR4/GALR2/ADRA2A/CASR
CC	GO:0072562	blood microparticle	68	-0.550173	-1.72042	0.00092025	0.0244969	0.0215394	1131	tags=35%, list=8%, signal=33%	A2M/ITIH1/ITIH2/ORM2/VTN/APCS/C4BPA/C8G/AMBP/PLG/BCHE/TF/ALB/AGT/C8A/CLU/GC/HPX/APOA2/AFM/SERPINC1/KNG1/AHSG/APOA1
BP	GO:0019751	polyol metabolic process	85	-0.532182	-1.74139	0.000828224	0.0232867	0.0204754	1634	tags=25%, list=12%, signal=22%	TKFC/PCBD1/PLCG2/DHFR/GCH1/SPTSSB/ASAH2/P2RY1/GK/PLA2G4A/MOGAT3/INPP5J/ANGPTL3/PTAFR/MOGAT1/GALR2/DGAT2/CYP27A1/DEGS2/PCK1/CYP3A4
BP	GO:0070988	demethylation	42	-0.603683	-1.74392	0.00171606	0.0359515	0.0316112	789	tags=19%, list=6%, signal=18%	A1CF/CYP3A5/CYP2C9/APOBEC1/EOMES/CYP2C8/CYP3A7/CYP3A4
BP	GO:0019730	antimicrobial humoral response	59	-0.566458	-1.74471	0.00123642	0.0291455	0.0256268	1132	tags=27%, list=8%, signal=25%	H2BC6/CXCL10/PLA2G6/PF4/KLK7/RNASE7/SLC11A1/SPINK5/LEAP2/ANG/TF/REG3A/PRSS3/PPBP/LYZ/PGC
BP	GO:0015711	organic anion transport	269	-0.464054	-1.75029	9.51143e-07	0.00011891	0.000104554	1095	tags=20%, list=8%, signal=18%	SLC26A9/UCP2/SLC7A2/ACE/SYK/MGST1/PPARG/CYB5RL/BDKRB2/CLTRN/PLA2G4A/SLC16A11/SLC12A2/SLC11A1/SLCO1B1/ABCC2/SLCO4A1/CEACAM1/SLC6A14/SLC27A1/TNFRSF11A/SLC26A1/SLC2A2/SLC17A9/GLTPD2/CYP4F2/SLC22A7/SLC17A4/FABP1/FABP6/SLC39A5/SLC23A1/NTRK2/SLC3A1/SLC27A2/TSPO2/SLC25A21/SLC43A1/SLC38A11/CFTR/CYP4A11/SLC6A20/NR0B2/PLA2G12B/ACE2/SLCO2B1/MTTP/SLC7A9/AKR1C4/CASR/PLA2G2A/RBP2/SLC26A3
BP	GO:0001676	long-chain fatty acid metabolic process	75	-0.547857	-1.75316	0.000385989	0.0132466	0.0116474	1084	tags=41%, list=8%, signal=38%	ABCD1/SCP2/AIG1/CBR1/PTGR1/HACL1/ACSL5/AKR1C3/CPT2/GSTP1/TBXAS1/ASAH2/FAAH2/CYP2S1/CYP1A1/PLA2G4A/CYP4F3/CYP2C18/SLC27A1/CYP2C9/CYP4F2/CYP4F11/CYP2C19/SLC27A2/CYP4F12/CYP4A11/CYP2C8/GSTA1/CYP2E1/PLA2G4C/CYP3A4
BP	GO:0033700	phospholipid efflux	12	-0.800417	-1.75678	0.00237707	0.0447588	0.0393552	237	tags=42%, list=2%, signal=41%	ABCA1/ABCG1/APOA2/APOC3/APOA1
BP	GO:0009395	phospholipid catabolic process	39	-0.621678	-1.76576	0.000901642	0.0240931	0.0211844	877	tags=26%, list=6%, signal=24%	PLA2G6/PLA2G4A/PLD1/SMPD3/ANGPTL3/PLA2G7/APOA2/LIPC/PLBD1/PLA2G4C
BP	GO:0015718	monocarboxylic acid transport	111	-0.526785	-1.76644	0.000117838	0.00532249	0.00467992	968	tags=23%, list=7%, signal=22%	ACE/SYK/PPARG/BDKRB2/PLA2G4A/SLC16A11/SLCO1B1/ABCC2/SLCO4A1/CEACAM1/SLC27A1/TNFRSF11A/CYP4F2/SLC22A7/FABP1/FABP6/SLC27A2/TSPO2/CYP4A11/NR0B2/PLA2G12B/SLCO2B1/AKR1C4/CASR/PLA2G2A/RBP2
BP	GO:0071827	plasma lipoprotein particle organization	33	-0.64007	-1.76666	0.00275049	0.0481404	0.0423286	670	tags=33%, list=5%, signal=32%	AGTR1/NR1H4/AGT/PLA2G7/ABCG1/APOA2/LIPC/MTTP/APOC3/APOA1/PLA2G2A
MF	GO:0004303	estradiol 17-beta-dehydrogenase [NAD(P)] activity	13	-0.78505	-1.76688	0.00170744	0.0358972	0.0315634	1667	tags=46%, list=12%, signal=40%	AKR1C3/HSD17B11/HSD17B2/HSD17B6/HSD17B13/AKR1C4
BP	GO:0071715	icosanoid transport	35	-0.635229	-1.77014	0.00205307	0.0407182	0.0358024	968	tags=40%, list=7%, signal=37%	ACE/SYK/BDKRB2/PLA2G4A/SLCO1B1/ABCC2/SLCO4A1/TNFRSF11A/CYP4F2/SLC22A7/CYP4A11/PLA2G12B/SLCO2B1/PLA2G2A
MF	GO:0004622	lysophospholipase activity	19	-0.722134	-1.77128	0.00269365	0.0477423	0.0419785	877	tags=47%, list=6%, signal=44%	PNPLA7/LYPLAL1/ABHD12/GDPD3/PLA2G6/PLA2G4A/ASPG/LIPC/PLA2G4C
BP	GO:0034368	protein-lipid complex remodeling	22	-0.698093	-1.77914	0.00207934	0.0409023	0.0359642	995	tags=50%, list=7%, signal=46%	AGTR1/NR1H4/AGT/PLA2G7/ABCG1/APOA2/LIPC/MTTP/APOC3/APOA1/PLA2G2A
BP	GO:0034369	plasma lipoprotein particle remodeling	22	-0.698093	-1.77914	0.00207934	0.0409023	0.0359642	995	tags=50%, list=7%, signal=46%	AGTR1/NR1H4/AGT/PLA2G7/ABCG1/APOA2/LIPC/MTTP/APOC3/APOA1/PLA2G2A
BP	GO:0010039	response to iron ion	26	-0.667843	-1.78158	0.00263001	0.047261	0.0415553	1963	tags=46%, list=15%, signal=40%	HMOX1/BCL2/TFRC/ABAT/FXN/PDX1/SLC40A1/CYP1A1/TFR2/TF/TFF1/HAMP
MF	GO:0004033	aldo-keto reductase (NADP) activity	26	-0.668717	-1.78391	0.0024646	0.0454869	0.0399954	2343	tags=54%, list=17%, signal=45%	AKR1E2/AKR1A1/AKR7L/CBR1/AKR7A2/AKR1C3/KCNAB1/ADH4/RDH12/ALDH3A1/AKR7A3/AKR1B10/AKR1D1/AKR1C4
MF	GO:0016903	oxidoreductase activity, acting on the aldehyde or oxo group of donors	43	-0.616608	-1.78756	0.00101217	0.0255819	0.0224935	1792	tags=44%, list=13%, signal=38%	BCKDHB/ALDH6A1/AKR1C3/ALDH1A2/ALDH5A1/ALDH3A2/ALDH2/FMO5/ALDH1B1/ALDH3B1/ALDH1L1/AOX1/ADH4/ALDH3A1/HAO1/ALDH1A1/CYP27A1/AKR1B10/AKR1C4
BP	GO:0043691	reverse cholesterol transport	13	-0.795375	-1.79012	0.0012196	0.0290936	0.0255812	287	tags=62%, list=2%, signal=60%	ABCA5/ABCA1/CLU/ABCG1/APOA2/LIPC/APOC3/APOA1
MF	GO:0016597	amino acid binding	32	-0.653479	-1.79089	0.00130121	0.0301649	0.0265232	593	tags=25%, list=4%, signal=24%	THNSL2/GLDC/TM4SF5/GRIN2B/ASS1/CPS1/CASR/OTC
BP	GO:0140448	signaling receptor ligand precursor processing	26	-0.671507	-1.79135	0.00229919	0.0441004	0.0387763	1101	tags=35%, list=8%, signal=32%	DPP4/ACE/BACE2/ERO1B/CASP1/BCHE/MME/PLA2G7/ACE2
MF	GO:0015645	fatty acid ligase activity	13	-0.796792	-1.7933	0.0012196	0.0290936	0.0255812	584	tags=46%, list=4%, signal=44%	ACSL5/SLC27A1/SLC27A2/ACSM2B/ACSM3/ACSM2A
BP	GO:0008210	estrogen metabolic process	26	-0.673046	-1.79545	0.00216687	0.042257	0.0371554	1385	tags=46%, list=10%, signal=41%	HSD17B11/UGT2B11/CYP1A1/SULT1E1/UGT2B17/HSD17B2/CYP3A5/UGT2B28/CYP2C9/CYP2C8/CYP3A7/CYP3A4
BP	GO:0009064	glutamine family amino acid metabolic process	61	-0.583092	-1.80118	0.000436652	0.0144198	0.012679	2203	tags=39%, list=16%, signal=33%	PPAT/SLC7A11/NIT2/GLUL/GCLC/GAD1/DGLUCY/OAT/DDAH1/ALDH5A1/GLS2/UCP2/SIRT4/RIMKLA/ADHFE1/AGMAT/GLYATL1/NR1H4/ASRGL1/ASS1/PRODH2/ARG1/CPS1/OTC
BP	GO:0006081	cellular aldehyde metabolic process	57	-0.587282	-1.80172	0.000713788	0.0211747	0.0186183	2783	tags=47%, list=21%, signal=38%	TKT/ALDH9A1/GRHPR/PARK7/ALDH8A1/HAGH/AKR1A1/WNT4/AKR7A2/AKR1C3/TKFC/GLYCTK/ALDH1A2/ALDH3A2/ALDH2/BCO2/ALDH3B1/BCO1/CLCN2/SDR16C5/ADH4/ALDH3A1/ALDOB/HOGA1/AKR7A3/AGXT2/ALDH1A1
BP	GO:0097006	regulation of plasma lipoprotein particle levels	52	-0.601601	-1.80302	0.000543444	0.0172156	0.0151372	670	tags=25%, list=5%, signal=24%	NR1H4/MYLIP/AGT/PLA2G7/ABCG1/APOA2/LIPC/DGAT2/CES3/MTTP/APOC3/APOA1/PLA2G2A
BP	GO:0090209	negative regulation of triglyceride metabolic process	10	-0.856346	-1.80329	0.000944024	0.0247289	0.0217435	415	tags=40%, list=3%, signal=39%	PLIN5/APOBEC1/CIDEC/APOC3
BP	GO:0071320	cellular response to cAMP	33	-0.654139	-1.80549	0.00158677	0.0344999	0.0303349	1705	tags=39%, list=13%, signal=35%	INHBB/ITPR2/STC1/AKAP6/AQP1/PTAFR/ASS1/FBP1/CFTR/GPD1/CPS1/PCK1/SLC26A3
BP	GO:0008202	steroid metabolic process	230	-0.487324	-1.80689	1.36813e-06	0.000159638	0.000140366	1415	tags=23%, list=10%, signal=21%	ABCA1/HSD17B11/LIPE/LGMN/SRD5A3/DHRS9/CYP7B1/UGT2B11/RORC/FMO5/CAT/CYP1A1/AFP/SULT1E1/SULT2B1/G6PC1/UGT1A4/UGT2B17/EPHX2/NR1H4/HSD17B2/CYP3A5/CLCN2/CYP8B1/UGT2B28/SPP1/CYP2C9/CEBPA/ANGPTL3/HSD17B6/HSD11B1/CYP2C19/NR1I2/GC/SLC27A2/ABCG1/PRLR/CFTR/GAL/APOA2/LIPC/NR0B2/CYP2C8/CYP27A1/RDH16/CYP2E1/CYP3A7/AKR1D1/AKR1C4/HSD11B2/HMGCS2/APOA1/SULT2A1/CYP3A4
BP	GO:0032787	monocarboxylic acid metabolic process	470	-0.455815	-1.80717	4.43649e-10	1.41181e-07	1.24137e-07	2312	tags=32%, list=17%, signal=28%	INSIG2/ALDH8A1/ACOX2/HPGD/ETFA/ABCD1/SCP2/ILVBL/XYLB/HAGH/CYGB/GALK1/AKR1A1/OXSM/BTD/SCPEP1/NDUFAB1/FGF19/AIG1/DECR1/ECHS1/UGT1A6/OSBPL7/KYNU/CBR1/PDK2/CYP39A1/PTGR1/GAD1/AUH/SLC4A4/HACL1/ARL2/ATP8B1/EDN2/LIAS/ALKBH7/ACSL5/PFKL/DCXR/OSBPL6/ETFB/AKR1C3/CPT2/ABAT/BDH2/FMO4/HEXB/ABHD3/PHYH/PECR/GSTP1/ECI1/RGN/FABP5/MPC2/CRYL1/ALDH1A2/ACADS/EHHADH/ALDH5A1/GIT1/DHRS9/ASPA/HADH/ACSS1/GAMT/CYP7B1/NR1H3/…
MF	GO:0008395	steroid hydroxylase activity	16	-0.764165	-1.81021	0.002548	0.0465759	0.0409529	1147	tags=62%, list=8%, signal=57%	CYP7B1/CYP1A1/CYP3A5/CYP8B1/CYP2C9/CYP2C19/CYP2C8/CYP27A1/CYP3A7/CYP3A4
BP	GO:0006775	fat-soluble vitamin metabolic process	33	-0.656042	-1.81074	0.00146923	0.0329369	0.0289605	880	tags=45%, list=7%, signal=43%	LGMN/ALDH1A2/CYP1A1/TTPA/UGT1A4/LRAT/BCO1/NQO1/CYP4F2/CYP4F11/GC/CYP4F12/CYP27A1/RBP2/CYP3A4
CC	GO:0034361	very-low-density lipoprotein particle	13	-0.805504	-1.81291	0.000866344	0.0237854	0.0209139	201	tags=38%, list=1%, signal=38%	APOO/APOH/APOA2/APOC3/APOA1
CC	GO:0034385	triglyceride-rich plasma lipoprotein particle	13	-0.805504	-1.81291	0.000866344	0.0237854	0.0209139	201	tags=38%, list=1%, signal=38%	APOO/APOH/APOA2/APOC3/APOA1
BP	GO:0055081	monoatomic anion homeostasis	12	-0.826081	-1.81311	0.000889186	0.023943	0.0210525	1450	tags=58%, list=11%, signal=52%	STK39/SLC12A8/TBXAS1/SLC12A2/CPS1/KCNE3/OTC
BP	GO:0006972	hyperosmotic response	24	-0.69121	-1.81326	0.00165874	0.0350841	0.0308485	1450	tags=33%, list=11%, signal=30%	STK39/EFHD1/ICOSLG/AQP1/SLC12A2/TLR3/FBP1/PCK1
BP	GO:0019731	antibacterial humoral response	28	-0.675464	-1.81437	0.000930218	0.0246303	0.0216568	1132	tags=29%, list=8%, signal=26%	H2BC6/PLA2G6/KLK7/RNASE7/SPINK5/ANG/TF/PGC
MF	GO:0016878	acid-thiol ligase activity	22	-0.713556	-1.81855	0.00116914	0.0283222	0.024903	1726	tags=41%, list=13%, signal=36%	ACSL5/SUCLG2/ACSS1/ACSS3/SLC27A1/SLC27A2/ACSM2B/ACSM3/ACSM2A
BP	GO:0006638	neutral lipid metabolic process	96	-0.549512	-1.8214	6.47474e-05	0.00319611	0.00281025	1379	tags=27%, list=10%, signal=24%	LIPE/RGN/DGKB/NR1H3/CAT/G6PC1/GK/PLA2G4A/MOGAT3/SLC27A1/PLAAT3/ANG/PLIN5/GPAT3/MOGAT1/APOBEC1/AADAC/APOH/APOA2/LIPC/CIDEC/DGAT2/MTTP/CPS1/PCK1/APOC3
BP	GO:0006639	acylglycerol metabolic process	96	-0.549512	-1.8214	6.47474e-05	0.00319611	0.00281025	1379	tags=27%, list=10%, signal=24%	LIPE/RGN/DGKB/NR1H3/CAT/G6PC1/GK/PLA2G4A/MOGAT3/SLC27A1/PLAAT3/ANG/PLIN5/GPAT3/MOGAT1/APOBEC1/AADAC/APOH/APOA2/LIPC/CIDEC/DGAT2/MTTP/CPS1/PCK1/APOC3
BP	GO:0034367	protein-containing complex remodeling	24	-0.694627	-1.82222	0.00147898	0.0329755	0.0289945	995	tags=46%, list=7%, signal=43%	AGTR1/NR1H4/AGT/PLA2G7/ABCG1/APOA2/LIPC/MTTP/APOC3/APOA1/PLA2G2A
MF	GO:0016405	CoA-ligase activity	18	-0.750886	-1.82262	0.00181162	0.0373922	0.032878	1193	tags=44%, list=9%, signal=41%	ACSL5/ACSS1/ACSS3/SLC27A1/SLC27A2/ACSM2B/ACSM3/ACSM2A
CC	GO:0098862	cluster of actin-based cell projections	114	-0.540506	-1.82516	6.20327e-05	0.00317	0.0027873	1058	tags=22%, list=8%, signal=20%	CLIC5/SLC15A1/ACE/SLC28A3/CLTRN/AQP1/SCIN/ADGRV1/AMN/SLC2A2/SLC17A4/MYO7A/MME/SLC3A1/FSCN2/MYO7B/ACE2/MTTP/SLC28A1/NHERF4/SLC7A9/MYO1A/SLC5A1/ITLN1/SLC26A3
BP	GO:0008209	androgen metabolic process	22	-0.717338	-1.82819	0.00105138	0.0261019	0.0229507	1385	tags=41%, list=10%, signal=37%	HSD17B11/SRD5A3/DHRS9/HSD17B2/SPP1/HSD17B6/AKR1D1/AKR1C4/CYP3A4
BP	GO:0050435	amyloid-beta metabolic process	45	-0.623481	-1.82954	0.000723979	0.0212252	0.0186628	1417	tags=22%, list=10%, signal=20%	SPON1/HAP1/ACE/BACE2/GSAP/MME/CLU/NTRK2/ABCG1/MGAT3
BP	GO:0046394	carboxylic acid biosynthetic process	246	-0.491022	-1.83028	2.51169e-07	3.58864e-05	3.15539e-05	2371	tags=37%, list=18%, signal=31%	EIF6/PSAT1/INSIG2/ALDH8A1/ACOX2/ABCD1/SCP2/ILVBL/AKR1A1/OXSM/NDUFAB1/FGF19/SERINC5/OSBPL7/KYNU/GLUL/CBR1/CYP39A1/MGST2/PYCARD/GAD1/EDN2/LIAS/OSBPL6/SEPHS2/AKR1C3/ABAT/ABHD3/PCBD1/OAT/PECR/GSTP1/RGN/FABP5/ALDH1A2/DHFR/DHRS9/ACSS1/GAMT/GLS2/CYP7B1/NR1H3/CBS/TBXAS1/ASAH2/BHMT2/HACD4/SYK/UST/CYP1A1/CARNS1/MLXIPL/APIP/PLA2G4A/CASP1/ACMSD/NR1H4/CTH/FA2H/CEACAM1/THNSL2/CYP8B1/CYP2C9/PDK4/GGTLC2/CYP4F11/…
BP	GO:0009066	aspartate family amino acid metabolic process	40	-0.643651	-1.83891	0.000370663	0.0128466	0.0112957	1390	tags=35%, list=10%, signal=31%	DDO/CRYM/ASPA/HYKK/BHMT2/APIP/RIDA/MAT1A/GCAT/ASPG/ASRGL1/ASS1/SLC25A21/PIPOX
BP	GO:0006690	icosanoid metabolic process	76	-0.57224	-1.83953	0.000183993	0.00772956	0.0067964	2005	tags=42%, list=15%, signal=36%	CBR1/MGST2/PTGR1/PYCARD/EDN2/AKR1C3/GSTP1/FABP5/TBXAS1/FAAH2/SYK/CYP2S1/CYP1A1/PLA2G4A/CASP1/TLR2/CYP4F3/CYP2C18/CYP2C9/GGTLC2/CYP4F2/CYP4F11/GGT6/CES2/CYP2C19/CYP4F12/CYP4A11/CYP2C8/GSTA1/CYP2E1/PLA2G4C/AKR1C4
BP	GO:1901661	quinone metabolic process	38	-0.646083	-1.8401	0.00106933	0.0264536	0.02326	2897	tags=50%, list=21%, signal=39%	CBR4/PDSS2/PDSS1/FDXR/COQ3/AKR1A1/CBR1/AKR7A2/COQ2/AKR1C3/NQO2/SULT1C4/NQO1/CYP4F2/CYP4F11/ADH4/CYP4F12/AKR1B10/AKR1C4
MF	GO:0102545	phosphatidyl phospholipase B activity	10	-0.875893	-1.84446	0.00029264	0.0106154	0.00933385	877	tags=50%, list=6%, signal=47%	PLA2G6/PLA2G4A/ASPG/LIPC/PLA2G4C
BP	GO:0016053	organic acid biosynthetic process	248	-0.494959	-1.84533	1.32373e-07	2.10623e-05	1.85195e-05	2371	tags=37%, list=18%, signal=31%	EIF6/PSAT1/INSIG2/ALDH8A1/ACOX2/ABCD1/SCP2/ILVBL/AKR1A1/OXSM/NDUFAB1/FGF19/SERINC5/OSBPL7/KYNU/GLUL/CBR1/CYP39A1/MGST2/PYCARD/GAD1/EDN2/LIAS/OSBPL6/SEPHS2/AKR1C3/ABAT/ABHD3/PCBD1/OAT/PECR/GSTP1/RGN/FABP5/ALDH1A2/DHFR/DHRS9/ACSS1/GAMT/GLS2/CYP7B1/NR1H3/CBS/TBXAS1/ASAH2/BHMT2/HACD4/SYK/UST/CYP1A1/CARNS1/MLXIPL/APIP/PLA2G4A/CASP1/ACMSD/NR1H4/CTH/FA2H/CEACAM1/THNSL2/CYP8B1/CYP2C9/PDK4/GGTLC2/CYP4F11/…
BP	GO:0000050	urea cycle	10	-0.877066	-1.84693	0.000280009	0.0103176	0.00907197	926	tags=60%, list=7%, signal=56%	AGMAT/CEBPA/ASS1/ARG1/CPS1/OTC
MF	GO:0008106	alcohol dehydrogenase (NADP+) activity	19	-0.754378	-1.85037	0.000802718	0.0229381	0.0201688	390	tags=58%, list=3%, signal=56%	AKR1E2/AKR1A1/CBR1/AKR7A2/AKR1C3/ADH4/RDH12/ALDH3A1/AKR1B10/AKR1D1/AKR1C4
BP	GO:0050832	defense response to fungus	17	-0.771504	-1.8541	0.00115027	0.0280593	0.0246718	1370	tags=29%, list=10%, signal=26%	PLCG2/RNASE7/CLEC4E/ARG1/HAMP
BP	GO:1901615	organic hydroxy compound metabolic process	413	-0.47229	-1.85427	3.78519e-10	1.32501e-07	1.16504e-07	1696	tags=26%, list=13%, signal=24%	OSBPL6/EBPL/AKR1C3/PAX8/SLC1A1/TKFC/PRKN/ABAT/RAB38/PCBD1/LIMA1/PECR/ABCA1/LIPE/HPN/PLCG2/LGMN/SRD5A3/ALDH1A2/CRYM/DHFR/DHRS9/GCH1/ACSS1/SPTSSB/CYP7B1/ALDH3A2/ASAH2/ALDH2/FMO5/ALDH1B1/PMEL/CAT/CYP1A1/SULT1C4/ACP3/TTPA/P2RY1/SULT1E1/ALDH3B1/SULT2B1/UGT1A4/GK/PLA2G4A/LRAT/EPHX2/BCO1/NR1H4/CYP3A5/CYP4F3/CYP2C18/MOGAT3/NQO1/CLCN2/CYP8B1/SDR16C5/IYD/INPP5J/CYP2C9/ADH1C/GCNT4/CEBPA/CYP4F2/MAOA/RBP4/ANG…
BP	GO:0042044	fluid transport	22	-0.727687	-1.85457	0.000707239	0.0210697	0.018526	1692	tags=36%, list=13%, signal=32%	CSF2/AQP11/AQP1/AQP5/AQP7/CFTR/NHERF4/SLC5A1
BP	GO:0006833	water transport	15	-0.803133	-1.85638	0.000797193	0.0229381	0.0201688	1334	tags=47%, list=10%, signal=42%	AQP11/AQP1/AQP5/AQP7/CFTR/NHERF4/SLC5A1
MF	GO:0019825	oxygen binding	18	-0.765522	-1.85815	0.00114171	0.0280461	0.0246602	1106	tags=56%, list=8%, signal=51%	CBS/CYP1A1/CYP3A5/CYP2C18/CYP8B1/ALB/CYP2C19/CYP2E1/CYP3A7/CYP3A4
MF	GO:0016877	ligase activity, forming carbon-sulfur bonds	32	-0.678521	-1.85952	0.000486618	0.015641	0.0137527	1726	tags=31%, list=13%, signal=27%	ACSL5/SUCLG2/UBA7/ACSS1/ACSS3/SLC27A1/SLC27A2/ACSM2B/ACSM3/ACSM2A
BP	GO:0046470	phosphatidylcholine metabolic process	56	-0.609031	-1.86101	0.000203505	0.00833179	0.00732592	1631	tags=36%, list=12%, signal=32%	TMEM86B/RAB38/ABHD3/FABP5/PEMT/NR1H3/PLA2G6/CHPT1/PLA2G4A/SLC27A1/PLAAT3/PLAAT4/PLA2G7/APOA2/LIPC/PLAAT2/SLC44A5/PLA2G4C/APOA1/PLA2G2A
BP	GO:0009068	aspartate family amino acid catabolic process	16	-0.786696	-1.86358	0.00101588	0.0255833	0.0224947	1390	tags=62%, list=10%, signal=56%	DDO/CRYM/ASPA/HYKK/RIDA/MAT1A/GCAT/ASRGL1/SLC25A21/PIPOX
MF	GO:0030170	pyridoxal phosphate binding	41	-0.651785	-1.87004	0.000239009	0.00909405	0.00799615	2346	tags=49%, list=17%, signal=40%	PSAT1/MTARC1/KYNU/MTARC2/PHYKPL/GPT2/GAD1/PYGB/ALAS1/ABAT/OAT/CBS/CTH/THNSL2/GLDC/GCAT/ALB/AGXT2/GPT/DDC
BP	GO:0033762	response to glucagon	13	-0.831426	-1.87126	0.000322732	0.0114114	0.0100337	228	tags=31%, list=2%, signal=30%	ASS1/CPS1/PCK1/HMGCS2
BP	GO:0019400	alditol metabolic process	18	-0.771628	-1.87297	0.000970032	0.0249676	0.0219533	2470	tags=61%, list=18%, signal=50%	COQ3/GALK1/COQ2/TKFC/GK/PLA2G4A/MOGAT3/ANGPTL3/MOGAT1/DGAT2/PCK1
BP	GO:0050995	negative regulation of lipid catabolic process	18	-0.771946	-1.87374	0.000952863	0.0247992	0.0218053	767	tags=33%, list=6%, signal=31%	PDE3B/PLIN5/APOA2/CIDEC/ADRA2A/APOC3
BP	GO:0046461	neutral lipid catabolic process	25	-0.711017	-1.87399	0.000802331	0.0229381	0.0201688	415	tags=32%, list=3%, signal=31%	PNPLA4/LIPE/PLIN5/AADAC/APOA2/LIPC/CPS1/APOC3
BP	GO:0046464	acylglycerol catabolic process	25	-0.711017	-1.87399	0.000802331	0.0229381	0.0201688	415	tags=32%, list=3%, signal=31%	PNPLA4/LIPE/PLIN5/AADAC/APOA2/LIPC/CPS1/APOC3
MF	GO:0004190	aspartic-type endopeptidase activity	17	-0.780067	-1.87468	0.000826662	0.0232867	0.0204754	864	tags=24%, list=6%, signal=22%	BACE2/CTSE/PIP/PGC
MF	GO:0070001	aspartic-type peptidase activity	17	-0.780067	-1.87468	0.000826662	0.0232867	0.0204754	864	tags=24%, list=6%, signal=22%	BACE2/CTSE/PIP/PGC
MF	GO:0070279	vitamin B6 binding	42	-0.64911	-1.87515	0.000219568	0.00863594	0.00759334	2346	tags=48%, list=17%, signal=39%	PSAT1/MTARC1/KYNU/MTARC2/PHYKPL/GPT2/GAD1/PYGB/ALAS1/ABAT/OAT/CBS/CTH/THNSL2/GLDC/GCAT/ALB/AGXT2/GPT/DDC
BP	GO:0034310	primary alcohol catabolic process	12	-0.855198	-1.87702	0.000228665	0.0088938	0.00782008	1049	tags=75%, list=8%, signal=69%	AKR1C3/ALDH2/ALDH1B1/SULT1C4/SULT1E1/ALDH3B1/HAO1/AKR1B10/SULT2A1
BP	GO:0046503	glycerolipid catabolic process	43	-0.647767	-1.87789	0.000238137	0.00909405	0.00799615	877	tags=23%, list=6%, signal=22%	PLA2G6/PLA2G4A/PLIN5/PLA2G7/AADAC/APOA2/LIPC/PLA2G4C/CPS1/APOC3
BP	GO:0022600	digestive system process	69	-0.599313	-1.88378	5.55595e-05	0.00290278	0.00255233	1471	tags=35%, list=11%, signal=31%	LIMA1/STK39/PBLD/TFF3/NR1H3/ABCG8/AQP1/AQP5/CYP8B1/TFF2/RBP4/CHRM3/FABP1/GCNT3/PRAP1/VSIG1/APOA2/TFF1/ADRA2A/MUC13/SLC5A1/SLC9A4/APOA1/HAMP
BP	GO:0070989	oxidative demethylation	11	-0.878353	-1.88415	0.000211463	0.00844731	0.00742749	622	tags=55%, list=5%, signal=52%	ALKBH2/CYP3A5/CYP2C9/CYP2C8/CYP3A7/CYP3A4
BP	GO:0016042	lipid catabolic process	242	-0.50679	-1.88943	3.65071e-08	6.72595e-06	5.91395e-06	2288	tags=35%, list=17%, signal=29%	ACOX2/SMPD2/HPGD/PRDX6/NAGLU/ETFA/ABCD1/SCP2/ILVBL/AIG1/DECR1/ECHS1/PLD6/GDPD3/CYP39A1/MGST2/PLA1A/AUH/HACL1/PNPLA4/ETFB/AKR1C3/CPT2/BDH2/HEXB/ABHD3/PHYH/ECI1/HSD17B11/LIPE/PLCG2/SRD5A3/ACADS/EHHADH/PLCH1/HADH/ASAH2/FAAH2/BCO2/MCEE/PLA2G6/NUDT8/NUDT7/SULT1E1/PDE3B/PLA2G4A/BCO1/CYP4F3/PLD1/SPP1/PLAAT3/SMPD3/CYP4F2/PLAAT4/ASPG/PLIN5/ANGPTL3/ACOXL/HSD17B6/HSD11B1/FABP1/PLA2G7/SLC27A2/HAO1/CYP4F12/AA…
BP	GO:0055092	sterol homeostasis	66	-0.604334	-1.89219	6.3632e-05	0.00319611	0.00281025	2397	tags=42%, list=18%, signal=35%	CAV1/LDLRAP1/ABCD1/ABCG5/RORA/CYP39A1/ABCA5/MALL/LIMA1/ABCA1/CYP7B1/NR1H3/GRAMD1B/G6PC1/ABCG8/EPHX2/NR1H4/MYLIP/ANGPTL3/ABCG1/APOA2/LIPC/ACSM3/PLA2G12B/DGAT2/MTTP/APOC3/APOA1
BP	GO:0006071	glycerol metabolic process	16	-0.798964	-1.89264	0.000739361	0.0215678	0.018964	784	tags=56%, list=6%, signal=53%	COQ2/TKFC/GK/PLA2G4A/MOGAT3/ANGPTL3/MOGAT1/DGAT2/PCK1
BP	GO:0046337	phosphatidylethanolamine metabolic process	20	-0.758316	-1.89685	0.000492341	0.0157392	0.013839	877	tags=30%, list=6%, signal=28%	PLA2G6/SLC27A1/PLAAT3/PLAAT4/PLAAT2/PLA2G2A
BP	GO:0071398	cellular response to fatty acid	25	-0.722269	-1.90364	0.000460225	0.0149862	0.013177	670	tags=32%, list=5%, signal=30%	NR1H4/PDK4/PTAFR/ASS1/DGAT2/CPS1/AKR1C4/HMGCS2
BP	GO:0006520	amino acid metabolic process	231	-0.514017	-1.90433	2.43904e-08	4.74325e-06	4.17061e-06	2301	tags=33%, list=17%, signal=28%	ALDH8A1/GSTZ1/AARS1/ETFA/ILVBL/PPAT/SLC7A11/SERINC5/NIT2/ECHS1/KYNU/GLUL/HGD/GCLC/GPT2/GAD1/AUH/DGLUCY/BCKDHB/ALDH6A1/ETFB/SEPHS2/MARS2/ABAT/PCBD1/OAT/DDO/DDAH1/HIBCH/CRYM/DHFR/ALDH5A1/ASPA/GLS2/CBS/UCP2/PEPD/SIRT4/ACADSB/RIMKLA/ADHFE1/HYKK/BHMT2/AGMAT/CARNS1/APIP/GLYATL1/ACMSD/NR1H4/RIDA/CTH/THNSL2/GLDC/FN3K/IYD/MAT1A/GCAT/HPDL/ASPG/ASRGL1/HAAO/HAO1/ASS1/HOGA1/SLC25A21/PIPOX/PRODH2/AGXT2/GPT/DDC…
BP	GO:0055090	acylglycerol homeostasis	31	-0.696625	-1.90881	0.000313828	0.0111528	0.0098064	1110	tags=42%, list=8%, signal=39%	NR1H3/MLXIPL/ABCG8/GCKR/NR1H4/ANGPTL3/ANGPTL8/LIPC/PLA2G12B/DGAT2/APOC3/ACSM2A/APOA1
BP	GO:0070328	triglyceride homeostasis	31	-0.696625	-1.90881	0.000313828	0.0111528	0.0098064	1110	tags=42%, list=8%, signal=39%	NR1H3/MLXIPL/ABCG8/GCKR/NR1H4/ANGPTL3/ANGPTL8/LIPC/PLA2G12B/DGAT2/APOC3/ACSM2A/APOA1
MF	GO:0016709	oxidoreductase activity, acting on paired donors, with incorporation or reduction of molecular oxygen, NAD(P)H as one donor, and incorporation of one atom of oxygen	28	-0.711239	-1.91046	0.000207465	0.00839575	0.00738216	1147	tags=50%, list=8%, signal=46%	CYP7B1/FMO5/CYP1A1/CYP4X1/CYP2C9/CYP4F2/CYP4F11/CYP2C19/FMO3/CYP27A1/CYP2E1/AKR1D1/AKR1C4/CYP3A4
BP	GO:0042632	cholesterol homeostasis	65	-0.609838	-1.91077	8.88438e-05	0.00426024	0.00374591	1952	tags=37%, list=14%, signal=32%	RORA/CYP39A1/ABCA5/MALL/LIMA1/ABCA1/CYP7B1/NR1H3/GRAMD1B/G6PC1/ABCG8/EPHX2/NR1H4/MYLIP/ANGPTL3/ABCG1/APOA2/LIPC/ACSM3/PLA2G12B/DGAT2/MTTP/APOC3/APOA1
BP	GO:0070542	response to fatty acid	44	-0.655665	-1.91642	0.000177148	0.00756229	0.00664932	1094	tags=34%, list=8%, signal=31%	UCP2/TBXAS1/PDX1/CAT/ILDR1/TLR2/NR1H4/GLDC/PDK4/PTAFR/ASS1/DGAT2/CPS1/AKR1C4/HMGCS2
BP	GO:0010817	regulation of hormone levels	361	-0.497417	-1.92025	1e-10	4.23968e-08	3.72783e-08	1809	tags=30%, list=13%, signal=27%	PNPLA4/TNFSF11/JAK2/SYBU/FOXA1/FZD4/PFKL/INHBB/AKR1C3/PAX8/PRKN/ABAT/ATP1A1/VSNL1/SLC22A9/SOX8/NDST2/DDO/HSD17B11/LIPE/HPN/SRD5A3/MPC2/ALDH1A2/CRYM/LYN/DHRS9/HADH/DPP4/UCP2/SIRT4/UGT2B11/SSTR5/PDX1/EDN3/BCO2/AGTR1/ACE/CYP2S1/PPARG/KISS1/CYP1A1/PLA2G6/BACE2/P2RY1/AFP/SULT1E1/CLTRN/ERO1B/SFRP1/IL1RN/AQP1/ILDR1/UGT2B17/LRAT/BCO1/NR1H4/SLCO1B1/HSD17B2/CYP3A5/SLCO4A1/CYP2C18/TFR2/CLCN2/UGT2B28/SDR16C5…
BP	GO:0044058	regulation of digestive system process	22	-0.75619	-1.92721	0.000247776	0.00927638	0.00815647	1450	tags=45%, list=11%, signal=41%	STK39/NR1H3/ABCG8/AQP1/CYP8B1/TFF2/PRAP1/APOA2/APOA1/HAMP
MF	GO:0046906	tetrapyrrole binding	90	-0.589043	-1.93721	6.22846e-06	0.000545068	0.000479264	1322	tags=33%, list=10%, signal=30%	TCN2/GUCY1B1/CYP7B1/CBS/TBXAS1/CAT/SLC48A1/CYP2S1/CYP1A1/CYP4X1/FA2H/CYP3A5/CYP4F3/CYP2C18/AMBP/CYP8B1/CYB5A/CYP2C9/CYP4F2/CYP4F11/CYP2C19/CYP4F12/CYP4A11/CYP2C8/CYP27A1/CYP2E1/TCN1/CYP3A7/STEAP4/CYP3A4
MF	GO:0020037	heme binding	81	-0.59687	-1.9375	2.49462e-05	0.00157341	0.00138345	1273	tags=35%, list=9%, signal=31%	GUCY1B1/CYP7B1/CBS/TBXAS1/CAT/SLC48A1/CYP2S1/CYP1A1/CYP4X1/FA2H/CYP3A5/CYP4F3/CYP2C18/AMBP/CYP8B1/CYB5A/CYP2C9/CYP4F2/CYP4F11/CYP2C19/CYP4F12/CYP4A11/CYP2C8/CYP27A1/CYP2E1/CYP3A7/STEAP4/CYP3A4
CC	GO:0005903	brush border	82	-0.59524	-1.94128	8.53902e-06	0.000664241	0.000584049	1019	tags=26%, list=8%, signal=24%	SLC15A1/ACE/SLC28A3/CLTRN/AQP1/SCIN/AMN/SLC2A2/SLC17A4/MME/SLC3A1/MYO7B/ACE2/MTTP/SLC28A1/NHERF4/SLC7A9/MYO1A/SLC5A1/ITLN1/SLC26A3
BP	GO:0019627	urea metabolic process	12	-0.884731	-1.94184	3.02695e-05	0.00181125	0.00159259	926	tags=67%, list=7%, signal=62%	AGMAT/NR1H4/CYP2C9/CEBPA/ASS1/ARG1/CPS1/OTC
BP	GO:0071941	nitrogen cycle metabolic process	12	-0.884731	-1.94184	3.02695e-05	0.00181125	0.00159259	926	tags=67%, list=7%, signal=62%	AGMAT/NR1H4/CYP2C9/CEBPA/ASS1/ARG1/CPS1/OTC
MF	GO:0033764	steroid dehydrogenase activity, acting on the CH-OH group of donors, NAD or NADP as acceptor	20	-0.778473	-1.94727	0.000184379	0.00772956	0.0067964	1867	tags=55%, list=14%, signal=47%	RDH5/AKR1C3/HSD17B11/DHRS9/HSD17B2/HSD17B6/HSD11B1/RDH16/HSD17B13/AKR1C4/HSD11B2
BP	GO:0019369	arachidonic acid metabolic process	37	-0.689853	-1.94886	0.000174756	0.00750592	0.00659975	1084	tags=43%, list=8%, signal=40%	TBXAS1/FAAH2/CYP2S1/CYP1A1/PLA2G4A/CYP4F3/CYP2C18/CYP2C9/CYP4F2/CYP4F11/CYP2C19/CYP4F12/CYP4A11/CYP2C8/CYP2E1/PLA2G4C
MF	GO:0008392	arachidonic acid epoxygenase activity	10	-0.925646	-1.94923	8.15224e-06	0.000649772	0.000571327	904	tags=90%, list=7%, signal=84%	CYP2S1/CYP2C18/CYP2C9/CYP4F2/CYP2C19/CYP4F12/CYP4A11/CYP2C8/CYP2E1
BP	GO:0071466	cellular response to xenobiotic stimulus	135	-0.567069	-1.95446	5.0901e-07	6.98741e-05	6.14384e-05	1072	tags=30%, list=8%, signal=28%	UGT2B11/RORC/FMO5/CYP2S1/CYP1A1/SULT1C4/SLC28A3/UGT2B17/PDE4B/CMBL/SLCO1B1/CYP3A5/ABCC2/CYP2C18/NQO1/TLR3/UGT2B28/CYP2C9/BCHE/CYP4F2/AOX1/NAT2/CES2/SLC22A7/ALDH3A1/CYP2C19/NR1I2/CYP4F12/AADAC/FBP1/ACSM2B/CYP2C8/CES3/SLCO2B1/GSTA1/CYP2E1/CYP3A7/SULT2A1/GSTA2/CYP3A4
BP	GO:0006641	triglyceride metabolic process	75	-0.612787	-1.96093	8.1674e-06	0.000649772	0.000571327	1379	tags=31%, list=10%, signal=28%	LIPE/RGN/NR1H3/CAT/G6PC1/GK/MOGAT3/SLC27A1/PLAAT3/PLIN5/GPAT3/MOGAT1/APOBEC1/AADAC/APOH/APOA2/LIPC/CIDEC/DGAT2/MTTP/CPS1/PCK1/APOC3
MF	GO:0005496	steroid binding	80	-0.607218	-1.96497	1.51794e-05	0.00104187	0.000916088	1555	tags=31%, list=12%, signal=28%	ATP1A1/ESR2/ABCA1/SHBG/STARD5/IRX5/NR1H3/PAQR8/RORC/NR3C2/GRAMD1B/SULT1E1/SULT2B1/AR/NR1H4/HSD11B1/GC/ABCG1/TSPO2/APOA2/AKR1D1/HSD11B2/APOC3/APOA1/CYP3A4
MF	GO:0004497	monooxygenase activity	62	-0.636029	-1.97433	1.31908e-05	0.000932816	0.0008202	1147	tags=40%, list=8%, signal=37%	CYP7B1/TBXAS1/FMO5/CYP2S1/CYP1A1/CYP4X1/CYP3A5/CYP4F3/CYP2C18/CYP8B1/CYP2C9/CYP4F2/CYP4F11/CYP2C19/CYP4F12/FMO3/CYP4A11/CYP2C8/CYP27A1/CYP2E1/CYP3A7/AKR1D1/PAH/AKR1C4/CYP3A4
CC	GO:0031526	brush border membrane	42	-0.686707	-1.98376	3.86693e-05	0.00215599	0.0018957	968	tags=33%, list=7%, signal=31%	ACE/SLC28A3/CLTRN/AQP1/AMN/SLC17A4/SLC3A1/ACE2/MTTP/SLC28A1/SLC7A9/SLC5A1/ITLN1/SLC26A3
MF	GO:0008391	arachidonic acid monooxygenase activity	11	-0.926158	-1.9867	4.85941e-06	0.000441828	0.000388487	904	tags=91%, list=7%, signal=85%	CYP2S1/CYP1A1/CYP2C18/CYP2C9/CYP4F2/CYP2C19/CYP4F12/CYP4A11/CYP2C8/CYP2E1
BP	GO:0031640	killing of cells of another organism	34	-0.720777	-2.00502	1.95619e-05	0.00129201	0.00113603	937	tags=32%, list=7%, signal=30%	SYK/GSDMB/PF4/RNASE7/C8G/C8A/ARG1/C6/LYZ/PLA2G2A/HAMP
BP	GO:0141061	disruption of cell in another organism	34	-0.720777	-2.00502	1.95619e-05	0.00129201	0.00113603	937	tags=32%, list=7%, signal=30%	SYK/GSDMB/PF4/RNASE7/C8G/C8A/ARG1/C6/LYZ/PLA2G2A/HAMP
MF	GO:0016229	steroid dehydrogenase activity	23	-0.777046	-2.00736	5.80313e-05	0.00298733	0.00262668	1867	tags=57%, list=14%, signal=49%	RDH5/AKR1C3/HSD17B11/SRD5A3/DHRS9/HSD17B2/HSD17B6/HSD11B1/RDH16/HSD17B13/AKR1D1/AKR1C4/HSD11B2
BP	GO:0019373	epoxygenase P450 pathway	12	-0.917568	-2.01391	1.82267e-06	0.000193341	0.00017	904	tags=83%, list=7%, signal=78%	CYP2S1/CYP1A1/CYP2C18/CYP2C9/CYP4F2/CYP2C19/CYP4F12/CYP4A11/CYP2C8/CYP2E1
BP	GO:1901605	alpha-amino acid metabolic process	158	-0.578413	-2.03468	8.86678e-09	1.93989e-06	1.70569e-06	2346	tags=41%, list=17%, signal=34%	PSAT1/ALDH8A1/GSTZ1/ILVBL/PPAT/SLC7A11/SERINC5/NIT2/KYNU/GLUL/HGD/GCLC/GPT2/GAD1/AUH/DGLUCY/ALDH6A1/SEPHS2/PCBD1/OAT/DDO/DDAH1/HIBCH/CRYM/DHFR/ALDH5A1/ASPA/GLS2/CBS/UCP2/SIRT4/ACADSB/RIMKLA/ADHFE1/HYKK/BHMT2/AGMAT/APIP/GLYATL1/ACMSD/NR1H4/RIDA/CTH/THNSL2/GLDC/IYD/MAT1A/GCAT/ASPG/ASRGL1/HAAO/HAO1/ASS1/HOGA1/SLC25A21/PIPOX/PRODH2/AGXT2/GPT/ARG1/CPS1/PAH/HPD/OTC
MF	GO:0004745	NAD-retinol dehydrogenase activity	16	-0.861846	-2.0416	2.10146e-05	0.00137498	0.00120899	512	tags=81%, list=4%, signal=78%	RDH5/AKR1C3/DHRS9/SDR16C5/ADH1C/ADH4/HSD17B6/RDH12/ADH6/RDH16/HSD17B13/ADH1A/ADH1B
BP	GO:0141060	disruption of anatomical structure in another organism	37	-0.72281	-2.04197	2.30524e-05	0.00146718	0.00129005	937	tags=32%, list=7%, signal=30%	SYK/GSDMB/PF4/RNASE7/C8G/C8A/REG3A/ARG1/C6/LYZ/PLA2G2A/HAMP
BP	GO:0006066	alcohol metabolic process	291	-0.538392	-2.04344	1e-10	4.23968e-08	3.72783e-08	1492	tags=26%, list=11%, signal=24%	PCBD1/LIMA1/PECR/ABCA1/LIPE/PLCG2/SRD5A3/ALDH1A2/DHFR/DHRS9/GCH1/ACSS1/SPTSSB/CYP7B1/ALDH3A2/ASAH2/ALDH2/FMO5/ALDH1B1/CAT/CYP1A1/SULT1C4/ACP3/P2RY1/SULT1E1/ALDH3B1/SULT2B1/UGT1A4/GK/PLA2G4A/LRAT/EPHX2/BCO1/NR1H4/CYP3A5/CYP2C18/MOGAT3/CLCN2/SDR16C5/INPP5J/CYP2C9/ADH1C/CEBPA/RBP4/ANGPTL3/PTAFR/ADH4/HSD17B6/MOGAT1/RDH12/ABCG1/HAO1/GALR2/CFTR/APOA2/LIPC/NR0B2/CYP2C8/DGAT2/GPD1/ADH6/ALDH1A1/CYP27A1/RD…
BP	GO:1901616	organic hydroxy compound catabolic process	45	-0.698055	-2.04837	1.06018e-05	0.00077316	0.000679818	1049	tags=44%, list=8%, signal=41%	ALDH2/ALDH1B1/SULT1C4/SULT1E1/ALDH3B1/GK/CYP4F3/CYP4F2/MAOA/ADH4/HSD17B6/HAO1/CYP4F12/CYP4A11/LDHD/CYP27A1/AKR1B10/AKR1D1/SULT2A1/CYP3A4
BP	GO:0042573	retinoic acid metabolic process	24	-0.788524	-2.06855	1.05461e-05	0.00077316	0.000679818	1314	tags=58%, list=10%, signal=53%	ALDH1A2/DHRS9/BCO2/CYP2S1/CYP1A1/CYP3A5/CYP2C18/ADH1C/CYP2C8/ADH6/CYP3A7/ADH1A/ADH1B/CYP3A4
BP	GO:0016054	organic acid catabolic process	202	-0.569346	-2.077	1.02949e-10	4.23968e-08	3.72783e-08	2301	tags=43%, list=17%, signal=36%	ALDH8A1/GSTZ1/ACOX2/ETFA/ABCD1/SCP2/ILVBL/XYLB/AKR1A1/AIG1/DECR1/ECHS1/KYNU/GLUL/HGD/GPT2/GAD1/AUH/HACL1/BCKDHB/TST/PON3/DCXR/ALDH6A1/ETFB/CPT2/ABAT/BDH2/HEXB/ABHD3/OAT/PHYH/ECI1/DDO/DDAH1/HIBCH/CRYL1/CRYM/ACADS/EHHADH/ALDH5A1/ASPA/HADH/GLS2/CBS/ACADSB/ADHFE1/HYKK/MCEE/CARNS1/NUDT8/IDNK/NUDT7/ACMSD/RIDA/CYP4F3/THNSL2/ALDH1L1/GLDC/NPL/MAT1A/GCAT/CYP4F2/PLIN5/ACOXL/ASRGL1/FABP1/HAAO/SLC27A2/HAO1/CY…
BP	GO:0046395	carboxylic acid catabolic process	202	-0.569346	-2.077	1.02949e-10	4.23968e-08	3.72783e-08	2301	tags=43%, list=17%, signal=36%	ALDH8A1/GSTZ1/ACOX2/ETFA/ABCD1/SCP2/ILVBL/XYLB/AKR1A1/AIG1/DECR1/ECHS1/KYNU/GLUL/HGD/GPT2/GAD1/AUH/HACL1/BCKDHB/TST/PON3/DCXR/ALDH6A1/ETFB/CPT2/ABAT/BDH2/HEXB/ABHD3/OAT/PHYH/ECI1/DDO/DDAH1/HIBCH/CRYL1/CRYM/ACADS/EHHADH/ALDH5A1/ASPA/HADH/GLS2/CBS/ACADSB/ADHFE1/HYKK/MCEE/CARNS1/NUDT8/IDNK/NUDT7/ACMSD/RIDA/CYP4F3/THNSL2/ALDH1L1/GLDC/NPL/MAT1A/GCAT/CYP4F2/PLIN5/ACOXL/ASRGL1/FABP1/HAAO/SLC27A2/HAO1/CY…
BP	GO:0042445	hormone metabolic process	165	-0.586304	-2.07768	1.06163e-09	2.99995e-07	2.63778e-07	1390	tags=34%, list=10%, signal=31%	DDO/HSD17B11/LIPE/HPN/SRD5A3/ALDH1A2/CRYM/DHRS9/DPP4/UGT2B11/BCO2/ACE/CYP2S1/CYP1A1/BACE2/AFP/SULT1E1/ERO1B/UGT2B17/LRAT/BCO1/HSD17B2/CYP3A5/CYP2C18/CLCN2/UGT2B28/SDR16C5/IYD/SPP1/CYP2C9/BCHE/ADH1C/GCNT4/RBP4/ADH4/HSD17B6/RDH12/MME/PLA2G7/GHR/GAL/CYP2C8/DGAT2/ACE2/ADH6/ALDH1A1/RDH16/AKR1B10/DIO1/CYP3A7/AKR1D1/ADH1A/AKR1C4/ADH1B/SULT2A1/CYP3A4
BP	GO:0007586	digestion	80	-0.646641	-2.09254	5.57749e-07	7.50923e-05	6.60266e-05	1471	tags=40%, list=11%, signal=36%	LIMA1/STK39/CAPN9/PBLD/TFF3/NR1H3/ASAH2/CCK/ABCG8/AQP1/AQP5/CYP8B1/TFF2/PPARGC1A/RBP4/CHRM3/FABP1/GCNT3/PRAP1/VSIG1/PRSS3/APOA2/TFF1/PIR/ADRA2A/MUC13/AKR1D1/SLC5A1/SLC9A4/APOA1/PGC/HAMP
MF	GO:0016616	oxidoreductase activity, acting on the CH-OH group of donors, NAD or NADP as acceptor	98	-0.633512	-2.10004	6.9224e-08	1.1539e-05	1.01459e-05	2005	tags=37%, list=15%, signal=32%	CBR1/AKR7A2/PTGR1/RDH5/DCXR/AKR1C3/BDH2/HSD17B11/CRYL1/EHHADH/DHRS9/HADH/ADHFE1/KCNAB1/DHDH/HSD17B2/SDR16C5/ADH1C/ADH4/HSD17B6/HSD11B1/RDH12/ALDH3A1/AKR7A3/GPD1/ADH6/LDHD/CYP27A1/RDH16/HSD17B13/AKR1B10/AKR1D1/ADH1A/AKR1C4/HSD11B2/ADH1B
BP	GO:0006067	ethanol metabolic process	17	-0.881933	-2.11949	7.60602e-07	9.86106e-05	8.67057e-05	1193	tags=71%, list=9%, signal=64%	ACSS1/ALDH2/ALDH1B1/SULT1C4/SULT1E1/ALDH3B1/ADH1C/ADH4/ADH6/ADH1A/ADH1B/SULT2A1
BP	GO:0044282	small molecule catabolic process	297	-0.562145	-2.14199	1e-10	4.23968e-08	3.72783e-08	2301	tags=41%, list=17%, signal=35%	ALDH8A1/GSTZ1/ACOX2/ETFA/ABCD1/SCP2/ILVBL/XYLB/HAGH/GALK1/AKR1A1/AIG1/DECR1/ADA2/ECHS1/KYNU/GLUL/HGD/GPT2/CYP39A1/GAD1/AUH/HACL1/BCKDHB/TST/PON3/PFKL/DCXR/ALDH6A1/ETFB/AKR1C3/TKFC/APOBEC3F/CPT2/ENPP4/ABAT/BDH2/NQO2/HEXB/ABHD3/OAT/GLYCTK/FUT2/PHYH/ECI1/DDO/DDAH1/SRD5A3/HIBCH/CRYL1/CRYM/ACADS/EHHADH/ALDH5A1/ASPA/HADH/GLS2/CBS/ACADSB/ALDH2/ADHFE1/HYKK/MCEE/ALDH1B1/DHDH/CYP1A1/SULT1C4/CARNS1/NUDT8/ID…
MF	GO:0070330	aromatase activity	15	-0.930779	-2.15143	2.0179e-08	4.15509e-06	3.65346e-06	880	tags=93%, list=7%, signal=87%	CYP1A1/CYP3A5/CYP4F3/CYP2C18/CYP2C9/CYP4F2/CYP4F11/CYP2C19/CYP4F12/CYP4A11/CYP2C8/CYP2E1/CYP3A7/CYP3A4
BP	GO:1901606	alpha-amino acid catabolic process	69	-0.689043	-2.16582	3.29026e-08	6.22571e-06	5.4741e-06	2050	tags=52%, list=15%, signal=44%	KYNU/GLUL/HGD/GPT2/GAD1/AUH/ALDH6A1/OAT/DDO/DDAH1/HIBCH/CRYM/ASPA/GLS2/CBS/ACADSB/ADHFE1/HYKK/ACMSD/RIDA/THNSL2/GLDC/MAT1A/GCAT/ASRGL1/HAAO/HOGA1/SLC25A21/PIPOX/PRODH2/AGXT2/GPT/ARG1/PAH/HPD/OTC
MF	GO:0016614	oxidoreductase activity, acting on CH-OH group of donors	106	-0.648048	-2.1684	1.22382e-09	3.29537e-07	2.89753e-07	1385	tags=39%, list=10%, signal=35%	CBR1/AKR7A2/PTGR1/RDH5/DCXR/AKR1C3/BDH2/HSD17B11/CHDH/CRYL1/EHHADH/DHRS9/HADH/ALDH3A2/ADHFE1/KCNAB1/DHDH/HSD17B2/CYP4F3/SDR16C5/ADH1C/CYP4F2/ADH4/HSD17B6/HSD11B1/RDH12/ALDH3A1/HAO1/AKR7A3/GPD1/ADH6/LDHD/CYP27A1/RDH16/HSD17B13/AKR1B10/AKR1D1/ADH1A/AKR1C4/HSD11B2/ADH1B
BP	GO:0120254	olefinic compound metabolic process	111	-0.647111	-2.16993	1.07126e-09	2.99995e-07	2.63778e-07	1407	tags=41%, list=10%, signal=37%	GSTP1/LIPE/ALDH1A2/DHRS9/TBXAS1/FAAH2/BCO2/CYP2S1/CYP1A1/AFP/PLA2G4A/LRAT/EPHX2/BCO1/CYP3A5/CYP4F3/CYP2C18/CLCN2/SDR16C5/CYP2C9/ADH1C/CYP4F2/CYP4F11/RBP4/ADH4/HSD17B6/RDH12/CYP2C19/CYP4F12/CYP4A11/CYP2C8/DGAT2/ADH6/GSTA1/ALDH1A1/RDH16/AKR1B10/CYP2E1/CYP3A7/PLA2G4C/ADH1A/AKR1C4/HSD11B2/ADH1B/CYP3A4
BP	GO:0009063	amino acid catabolic process	86	-0.664066	-2.1708	2.43324e-08	4.74325e-06	4.17061e-06	2301	tags=52%, list=17%, signal=44%	ALDH8A1/GSTZ1/ETFA/ECHS1/KYNU/GLUL/HGD/GPT2/GAD1/AUH/BCKDHB/ALDH6A1/ETFB/ABAT/OAT/DDO/DDAH1/HIBCH/CRYM/ALDH5A1/ASPA/GLS2/CBS/ACADSB/ADHFE1/HYKK/CARNS1/ACMSD/RIDA/THNSL2/GLDC/MAT1A/GCAT/ASRGL1/HAAO/HOGA1/SLC25A21/PIPOX/PRODH2/AGXT2/GPT/ARG1/PAH/HPD/OTC
BP	GO:0042572	retinol metabolic process	40	-0.782944	-2.23687	4.10177e-08	7.3632e-06	6.47426e-06	1379	tags=60%, list=10%, signal=54%	LIPE/ALDH1A2/DHRS9/CYP1A1/LRAT/BCO1/CYP3A5/CYP2C18/SDR16C5/ADH1C/RBP4/ADH4/HSD17B6/RDH12/CYP2C8/DGAT2/ADH6/ALDH1A1/RDH16/AKR1B10/CYP3A7/ADH1A/ADH1B/CYP3A4
BP	GO:0006720	isoprenoid metabolic process	103	-0.679598	-2.27486	1.64968e-10	6.07865e-08	5.34479e-08	1423	tags=35%, list=11%, signal=32%	PHYH/PECR/LIPE/SRD5A3/ALDH1A2/DHRS9/ALDH3A2/BCO2/CYP2S1/CYP1A1/LRAT/BCO1/CYP3A5/CYP2C18/SDR16C5/CYP2C9/ADH1C/RBP4/ADH4/HSD17B6/RDH12/CYP2C19/CYP2C8/DGAT2/ADH6/ALDH1A1/RDH16/AKR1B10/CYP2E1/CYP3A7/ADH1A/AKR1C4/HMGCS2/ADH1B/RBP2/CYP3A4
MF	GO:0016712	oxidoreductase activity, acting on paired donors, with incorporation or reduction of molecular oxygen, reduced flavin or flavoprotein as one donor, and incorporation of one atom of oxygen	25	-0.865271	-2.28055	1.53533e-08	3.25722e-06	2.86399e-06	1147	tags=68%, list=8%, signal=62%	CYP7B1/CYP2S1/CYP1A1/CYP3A5/CYP4F3/CYP2C18/CYP8B1/CYP2C9/CYP4F2/CYP4F11/CYP2C19/CYP4F12/CYP4A11/CYP2C8/CYP2E1/CYP3A7/CYP3A4
BP	GO:0006805	xenobiotic metabolic process	89	-0.701502	-2.30443	1e-10	4.23968e-08	3.72783e-08	1072	tags=42%, list=8%, signal=39%	UGT2B11/RORC/FMO5/CYP2S1/CYP1A1/SULT1C4/SLC28A3/UGT2B17/CMBL/SLCO1B1/CYP3A5/ABCC2/CYP2C18/NQO1/UGT2B28/CYP2C9/BCHE/CYP4F2/AOX1/NAT2/CES2/SLC22A7/ALDH3A1/CYP2C19/NR1I2/CYP4F12/AADAC/ACSM2B/CYP2C8/CES3/SLCO2B1/GSTA1/CYP2E1/CYP3A7/SULT2A1/GSTA2/CYP3A4
BP	GO:0001523	retinoid metabolic process	57	-0.763322	-2.34179	4.05156e-10	1.35071e-07	1.18765e-07	1379	tags=49%, list=10%, signal=44%	LIPE/ALDH1A2/DHRS9/BCO2/CYP2S1/CYP1A1/LRAT/BCO1/CYP3A5/CYP2C18/SDR16C5/ADH1C/RBP4/ADH4/HSD17B6/RDH12/CYP2C8/DGAT2/ADH6/ALDH1A1/RDH16/AKR1B10/CYP3A7/ADH1A/AKR1C4/ADH1B/RBP2/CYP3A4
BP	GO:0016101	diterpenoid metabolic process	60	-0.75878	-2.34346	1.26466e-10	4.91881e-08	4.32498e-08	1416	tags=50%, list=10%, signal=45%	PECR/LIPE/ALDH1A2/DHRS9/ALDH3A2/BCO2/CYP2S1/CYP1A1/LRAT/BCO1/CYP3A5/CYP2C18/SDR16C5/ADH1C/RBP4/ADH4/HSD17B6/RDH12/CYP2C8/DGAT2/ADH6/ALDH1A1/RDH16/AKR1B10/CYP3A7/ADH1A/AKR1C4/ADH1B/RBP2/CYP3A4
BP	GO:0006721	terpenoid metabolic process	69	-0.760723	-2.39113	1e-10	4.23968e-08	3.72783e-08	1416	tags=49%, list=10%, signal=44%	PECR/LIPE/ALDH1A2/DHRS9/ALDH3A2/BCO2/CYP2S1/CYP1A1/LRAT/BCO1/CYP3A5/CYP2C18/SDR16C5/CYP2C9/ADH1C/RBP4/ADH4/HSD17B6/RDH12/CYP2C19/CYP2C8/DGAT2/ADH6/ALDH1A1/RDH16/AKR1B10/CYP2E1/CYP3A7/ADH1A/AKR1C4/HMGCS2/ADH1B/RBP2/CYP3A4
BP	GO:0034308	primary alcohol metabolic process	81	-0.742241	-2.40939	1e-10	4.23968e-08	3.72783e-08	1416	tags=48%, list=10%, signal=43%	PECR/LIPE/ALDH1A2/DHRS9/ACSS1/ALDH3A2/ALDH2/ALDH1B1/CYP1A1/SULT1C4/ACP3/SULT1E1/ALDH3B1/LRAT/BCO1/CYP3A5/CYP2C18/CLCN2/SDR16C5/ADH1C/RBP4/ADH4/HSD17B6/RDH12/HAO1/CYP2C8/DGAT2/GPD1/ADH6/ALDH1A1/RDH16/AKR1B10/CYP3A7/ADH1A/AKR1C4/HSD11B2/ADH1B/SULT2A1/CYP3A4

## Sheet: S3_GSEA Chol_fibrotic_REACTOME
Supplementary Dataset 4_S3: GSEA enriched in Cholangiocyte cells from fibrotic compared to healthy conditions. REACTOME pathways. Related to Fig.5 and Extended Data Fig.10. Filtered for p.adjust < 0.05.
ID	Description	setSize	enrichmentScore	NES	pvalue	p.adjust	qvalue	rank	leading_edge	core_enrichment
R-HSA-1474290	Collagen formation	67	0.755197	2.46869	1e-10	2.06143e-08	1.8797e-08	1412	tags=49%, list=9%, signal=45%	COL1A2/COL3A1/COL8A1/COL6A3/PXDN/LOX/COL5A2/COL6A2/ADAMTS2/MMP13/COL1A1/COL5A1/PCOLCE/LOXL2/COL7A1/COL4A1/MMP3/COL4A2/PLOD2/COL12A1/LOXL1/PCOLCE2/COL5A3/COL6A1/P4HA3/P3H3/COLGALT1/COL27A1/COL4A3/SERPINH1/P3H2/COL16A1/ADAMTS14
R-HSA-3000178	ECM proteoglycans	52	0.802827	2.45914	1e-10	2.06143e-08	1.8797e-08	985	tags=50%, list=7%, signal=47%	COL1A2/DCN/COL3A1/SPARC/COL6A3/BGN/COL5A2/COL6A2/LUM/COL1A1/COL5A1/FMOD/LAMA2/FN1/LAMA4/MATN3/ITGB3/SERPINE1/COL4A1/COL4A2/TNC/PTPRS/ITGB6/ITGB1/COL5A3/COL6A1
R-HSA-1474244	Extracellular matrix organization	214	0.640545	2.44377	1e-10	2.06143e-08	1.8797e-08	1195	tags=35%, list=8%, signal=33%	COL1A2/DCN/COL3A1/COL8A1/SPARC/COL6A3/FBLN5/PXDN/EMILIN1/LOX/BGN/COL5A2/MMP11/COL6A2/FBN1/ITGA4/MMP2/ADAMTS2/MMP13/DDR2/CTSK/LUM/COL1A1/COL5A1/FMOD/LAMA2/PCOLCE/LTBP2/FN1/FBLN2/LAMA4/HTRA1/EFEMP1/MATN3/EFEMP2/ITGA5/ITGB3/MFAP2/SERPINE1/LOXL2/ADAM19/MMP19/ICAM1/COL7A1/COL4A1/ITGA11/MMP10/ITGA10/MMP3/COL4A2/PLOD2/NID2/COL12A1/TNC/PTPRS/LOXL1/ITGB6/PCOLCE2/FBLN1/MFAP5/THBS1/LTBP4/ITGB1/PDGFB/COL5A3/…
R-HSA-2022090	Assembly of collagen fibrils and other multimeric structures	46	0.800821	2.40793	1.6608e-10	2.99566e-08	2.73157e-08	1152	tags=50%, list=8%, signal=46%	COL1A2/COL3A1/COL8A1/COL6A3/PXDN/LOX/COL5A2/COL6A2/MMP13/COL1A1/COL5A1/PCOLCE/LOXL2/COL7A1/COL4A1/MMP3/COL4A2/COL12A1/LOXL1/COL5A3/COL6A1/COL27A1/COL4A3
R-HSA-1650814	Collagen biosynthesis and modifying enzymes	47	0.79349	2.38399	4.75911e-10	7.63043e-08	6.95776e-08	1757	tags=64%, list=12%, signal=56%	COL1A2/COL3A1/COL8A1/COL6A3/COL5A2/COL6A2/ADAMTS2/COL1A1/COL5A1/PCOLCE/COL7A1/COL4A1/COL4A2/PLOD2/COL12A1/PCOLCE2/COL5A3/COL6A1/P4HA3/P3H3/COLGALT1/COL27A1/COL4A3/SERPINH1/P3H2/COL16A1/ADAMTS14/BMP1/PLOD1/COL4A4
R-HSA-1442490	Collagen degradation	45	0.798758	2.38285	9.05734e-10	1.30697e-07	1.19176e-07	1195	tags=51%, list=8%, signal=47%	COL1A2/COL3A1/COL8A1/COL6A3/COL5A2/MMP11/COL6A2/MMP2/MMP13/CTSK/COL1A1/COL5A1/MMP19/COL7A1/COL4A1/MMP10/MMP3/COL4A2/COL12A1/COL5A3/COL6A1/COL4A3/MMP14
R-HSA-216083	Integrin cell surface interactions	61	0.730303	2.33736	3.32508e-08	3.42721e-06	3.12508e-06	985	tags=43%, list=7%, signal=40%	COL1A2/COL3A1/COL8A1/COL6A3/COL5A2/COL6A2/FBN1/ITGA4/LUM/COL1A1/COL5A1/FN1/ITGA5/ITGB3/ICAM1/COL7A1/COL4A1/ITGA11/ITGA10/COL4A2/TNC/ITGB6/THBS1/ITGB1/COL5A3/COL6A1
R-HSA-186797	Signaling by PDGF	53	0.741478	2.28105	2.01214e-08	2.4196e-06	2.20629e-06	1152	tags=34%, list=8%, signal=31%	COL3A1/PDGFRB/THBS2/COL6A3/PLAT/COL5A2/COL6A2/COL5A1/PDGFRA/COL4A1/COL4A2/THBS1/PDGFB/COL5A3/PLCG1/COL6A1/PDGFC/COL4A3
R-HSA-8948216	Collagen chain trimerization	26	0.85207	2.25958	1.74153e-08	2.28457e-06	2.08317e-06	1152	tags=62%, list=8%, signal=57%	COL1A2/COL3A1/COL8A1/COL6A3/COL5A2/COL6A2/COL1A1/COL5A1/COL7A1/COL4A1/COL4A2/COL12A1/COL5A3/COL6A1/COL27A1/COL4A3
R-HSA-8874081	MET activates PTK2 signaling	23	0.855051	2.20615	2.0835e-07	1.98342e-05	1.80857e-05	1118	tags=48%, list=8%, signal=44%	COL1A2/COL3A1/COL5A2/COL1A1/COL5A1/LAMA2/FN1/LAMA4/ITGB1/COL5A3/COL27A1
R-HSA-8875878	MET promotes cell motility	34	0.778135	2.2038	4.43589e-07	3.76529e-05	3.43335e-05	1118	tags=32%, list=8%, signal=30%	COL1A2/COL3A1/COL5A2/COL1A1/COL5A1/LAMA2/FN1/LAMA4/ITGB1/COL5A3/COL27A1
R-HSA-1474228	Degradation of the extracellular matrix	95	0.644769	2.20227	2.30462e-08	2.55813e-06	2.33261e-06	1195	tags=29%, list=8%, signal=27%	COL1A2/DCN/COL3A1/COL8A1/COL6A3/COL5A2/MMP11/COL6A2/FBN1/MMP2/MMP13/CTSK/COL1A1/COL5A1/FN1/HTRA1/MMP19/COL7A1/COL4A1/MMP10/MMP3/COL4A2/COL12A1/COL5A3/COL6A1/ELN/COL4A3/MMP14
R-HSA-1566948	Elastic fibre formation	36	0.76941	2.19922	9.43932e-07	6.81047e-05	6.21008e-05	1808	tags=69%, list=12%, signal=61%	FBLN5/EMILIN1/LOX/FBN1/LTBP2/FN1/FBLN2/EFEMP1/EFEMP2/ITGA5/ITGB3/MFAP2/LOXL2/LOXL1/ITGB6/FBLN1/MFAP5/LTBP4/ITGB1/LTBP1/ELN/TGFB3/FURIN/TGFB2/ITGAV
R-HSA-375165	NCAM signaling for neurite out-growth	47	0.688166	2.06755	7.09908e-06	0.000379406	0.000345959	2117	tags=47%, list=14%, signal=40%	COL3A1/COL6A3/COL5A2/COL6A2/COL5A1/CACNB2/NRTN/COL4A1/COL4A2/CACNB1/COL5A3/COL6A1/SPTBN5/CACNA1H/COL4A3/CACNB4/ARTN/SPTB/COL4A4/AGRN/COL4A5/SPTBN2
R-HSA-3000171	Non-integrin membrane-ECM interactions	52	0.672889	2.06112	1.21439e-05	0.000624171	0.000569146	2493	tags=54%, list=17%, signal=45%	COL1A2/COL3A1/COL5A2/DDR2/COL1A1/COL5A1/LAMA2/FN1/LAMA4/ITGB3/COL4A1/COL4A2/TNC/THBS1/ITGB1/PDGFB/COL5A3/COL4A3/COL4A4/ITGAV/AGRN/SDC3/COL4A5/ACTN1/FGF2/LAMC2/ITGB5/PDGFA
R-HSA-3560782	Diseases associated with glycosaminoglycan metabolism	33	0.730736	2.04908	2.76089e-05	0.00107675	0.000981826	2976	tags=67%, list=20%, signal=53%	DCN/BGN/LUM/FMOD/CHST6/CSPG4/CSPG5/CHST3/SLC26A2/CHSY1/CHST14/GPC6/GPC4/AGRN/SDC3/B4GALT1/B3GALT6/GPC2/EXT2/VCAN/B3GAT3/SDC4
R-HSA-2129379	Molecules associated with elastic fibres	30	0.749465	2.04159	2.43609e-05	0.00100436	0.000915822	1076	tags=57%, list=7%, signal=53%	FBLN5/EMILIN1/FBN1/LTBP2/FN1/FBLN2/EFEMP1/EFEMP2/ITGB3/MFAP2/ITGB6/FBLN1/MFAP5/LTBP4/ITGB1/LTBP1/ELN
R-HSA-2243919	Crosslinking of collagen fibrils	16	0.8412	2.02721	4.70948e-05	0.00169895	0.00154917	1757	tags=75%, list=12%, signal=66%	COL1A2/PXDN/LOX/COL1A1/PCOLCE/LOXL2/COL4A1/COL4A2/LOXL1/COL4A3/BMP1/COL4A4
R-HSA-3000170	Syndecan interactions	27	0.758382	2.02228	2.38806e-05	0.00100436	0.000915822	953	tags=41%, list=6%, signal=38%	COL1A2/COL3A1/COL5A2/COL1A1/COL5A1/FN1/ITGB3/TNC/THBS1/ITGB1/COL5A3
R-HSA-6806834	Signaling by MET	69	0.614269	2.01335	2.20157e-05	0.000980247	0.000893831	1748	tags=23%, list=12%, signal=21%	COL1A2/COL3A1/COL5A2/COL1A1/COL5A1/LAMA2/FN1/LAMA4/ITGB1/COL5A3/COL27A1/CBL/SHC1/TNS4/GAB1/RAB4B
R-HSA-2022870	Chondroitin sulfate biosynthesis	16	0.825866	1.99025	0.000110532	0.00346735	0.00316168	1006	tags=50%, list=7%, signal=47%	DCN/BGN/CSPG4/CSPG5/CHST3/CHST9/CHSY1/CHST15
R-HSA-419037	NCAM1 interactions	28	0.734254	1.97198	9.91799e-05	0.00318037	0.0029	1863	tags=64%, list=13%, signal=56%	COL3A1/COL6A3/COL5A2/COL6A2/COL5A1/CACNB2/NRTN/COL4A1/COL4A2/CACNB1/COL5A3/COL6A1/CACNA1H/COL4A3/CACNB4/ARTN/COL4A4/AGRN
R-HSA-9634597	GPER1 signaling	31	0.709878	1.94776	0.000199482	0.00587456	0.00535667	1032	tags=32%, list=7%, signal=30%	ADCY1/GNG11/FN1/ITGA5/ADCY4/ADCY3/GNB4/ADCY7/ITGB1/ADCY5
R-HSA-1971475	A tetrasaccharide linker sequence is required for GAG synthesis	22	0.755638	1.93973	0.00025959	0.00681069	0.00621028	2976	tags=68%, list=20%, signal=55%	DCN/BGN/CSPG4/CSPG5/B3GAT2/GPC6/XYLT2/GPC4/AGRN/SDC3/B3GALT6/GPC2/VCAN/B3GAT3/SDC4
R-HSA-141424	Amplification of signal from the kinetochores	93	0.560879	1.91883	3.22538e-05	0.00119339	0.00108818	1469	tags=20%, list=10%, signal=19%	CENPA/NUF2/PLK1/PMF1-BGLAP/NDC80/CENPF/AURKB/KIF2C/BUB1/DYNC1I1/BIRC5/RPS27/ERCC6L/CENPO/SPC24/SGO2/CENPQ/DYNC1I2/CENPI
R-HSA-141444	Amplification of signal from unattached kinetochores via a MAD2 inhibitory signal	93	0.560879	1.91883	3.22538e-05	0.00119339	0.00108818	1469	tags=20%, list=10%, signal=19%	CENPA/NUF2/PLK1/PMF1-BGLAP/NDC80/CENPF/AURKB/KIF2C/BUB1/DYNC1I1/BIRC5/RPS27/ERCC6L/CENPO/SPC24/SGO2/CENPQ/DYNC1I2/CENPI
R-HSA-2214320	Anchoring fibril formation	14	0.806293	1.87619	0.000566495	0.0129375	0.011797	2069	tags=64%, list=14%, signal=55%	COL1A2/COL1A1/COL7A1/COL4A1/COL4A2/COL4A3/BMP1/COL4A4/COL4A5
R-HSA-9006936	Signaling by TGFB family members	113	0.536109	1.8749	2.24173e-05	0.000980247	0.000893831	2071	tags=24%, list=14%, signal=21%	COL1A2/FBN1/BMPR1B/LTBP2/ITGB3/INHBA/SERPINE1/NOG/FSTL1/ITGB6/TGFBR1/LTBP4/ITGB1/LTBP1/PMEPA1/CDKN2B/JUNB/CBL/FOXH1/TGFB3/FURIN/TGFB2/SMAD7/ITGAV/AMH/SKIL/SMURF1
R-HSA-1793185	Chondroitin sulfate/dermatan sulfate metabolism	44	0.630325	1.86185	0.000222674	0.00630038	0.00574495	2976	tags=55%, list=20%, signal=44%	DCN/BGN/CSPG4/CSPG5/B3GAT2/CHST3/CHST9/CHSY1/CHST15/DSE/CHST14/GPC6/XYLT2/HYAL3/GPC4/AGRN/SDC3/B3GALT6/ARSB/CHST11/GPC2/VCAN/B3GAT3/SDC4
R-HSA-163359	Glucagon signaling in metabolic regulation	20	0.73718	1.86024	0.00129141	0.0238912	0.021785	1032	tags=35%, list=7%, signal=33%	ADCY1/GNG11/ADCY4/ADCY3/GNB4/ADCY7/ADCY5
R-HSA-4420332	Defective B3GALT6 causes EDSP2 and SEMDJL1	17	0.75812	1.8529	0.0010198	0.0201585	0.0183814	2976	tags=71%, list=20%, signal=57%	DCN/BGN/CSPG4/CSPG5/GPC6/GPC4/AGRN/SDC3/B3GALT6/GPC2/VCAN/SDC4
R-HSA-3560783	Defective B4GALT7 causes EDS, progeroid type	17	0.757987	1.85258	0.0010198	0.0201585	0.0183814	1891	tags=47%, list=13%, signal=41%	DCN/BGN/CSPG4/CSPG5/GPC6/GPC4/AGRN/SDC3
R-HSA-3560801	Defective B3GAT3 causes JDSSDHD	17	0.757859	1.85227	0.0010198	0.0201585	0.0183814	2976	tags=71%, list=20%, signal=57%	DCN/BGN/CSPG4/CSPG5/GPC6/GPC4/AGRN/SDC3/GPC2/VCAN/B3GAT3/SDC4
R-HSA-5663220	RHO GTPases Activate Formins	131	0.514823	1.83989	1.42976e-05	0.000687717	0.00062709	2109	tags=24%, list=14%, signal=21%	CENPA/NUF2/PLK1/PMF1-BGLAP/NDC80/FMNL1/DIAPH3/CENPF/AURKB/KIF2C/BUB1/DYNC1I1/BIRC5/ITGB1/RPS27/DVL1/ERCC6L/CENPO/SPC24/SGO2/TUBB6/CENPQ/SRF/DYNC1I2/FMNL3/CENPI/ACTB/TUBB3/SRGAP2/SPDL1/CENPE/SKA2
R-HSA-69618	Mitotic Spindle Checkpoint	109	0.529651	1.8327	6.4585e-05	0.00227308	0.00207269	1469	tags=18%, list=10%, signal=17%	CENPA/NUF2/PLK1/PMF1-BGLAP/NDC80/CENPF/AURKB/KIF2C/BUB1/DYNC1I1/UBE2C/BIRC5/RPS27/ERCC6L/CENPO/SPC24/SGO2/CENPQ/DYNC1I2/CENPI
R-HSA-2173789	TGF-beta receptor signaling activates SMADs	46	0.599623	1.80296	0.000573805	0.0129375	0.011797	2071	tags=35%, list=14%, signal=30%	FBN1/LTBP2/ITGB3/ITGB6/TGFBR1/LTBP4/ITGB1/LTBP1/PMEPA1/CBL/TGFB3/FURIN/TGFB2/SMAD7/ITGAV/SMURF1
R-HSA-2024101	CS/DS degradation	12	0.796708	1.80026	0.00159057	0.027653	0.0252152	378	tags=33%, list=3%, signal=33%	DCN/BGN/CSPG4/CSPG5
R-HSA-191273	Cholesterol biosynthesis	26	0.674861	1.78965	0.00194623	0.0319137	0.0291003	3118	tags=65%, list=21%, signal=52%	SQLE/CYP51A1/LSS/MSMO1/HMGCR/IDI1/ACAT2/HMGCS1/SC5D/SREBF2/MVD/DHCR24/DHCR7/FDFT1/MVK/EBP/FDPS
R-HSA-170834	Signaling by TGF-beta Receptor Complex	92	0.516472	1.76911	0.000567678	0.0129375	0.011797	2660	tags=27%, list=18%, signal=22%	COL1A2/FBN1/LTBP2/ITGB3/SERPINE1/ITGB6/TGFBR1/LTBP4/ITGB1/LTBP1/PMEPA1/CDKN2B/JUNB/CBL/TGFB3/FURIN/TGFB2/SMAD7/ITGAV/SKIL/SMURF1/ITGB5/NCOR2/ARHGEF18/CCNT1
R-HSA-2500257	Resolution of Sister Chromatid Cohesion	117	0.490742	1.72651	0.000247241	0.00673148	0.00613805	2685	tags=26%, list=18%, signal=22%	CENPA/NUF2/PLK1/PMF1-BGLAP/NDC80/CENPF/AURKB/KIF2C/BUB1/DYNC1I1/BIRC5/RPS27/ERCC6L/CENPO/SPC24/SGO2/TUBB6/CENPQ/DYNC1I2/CENPI/CCNB2/TUBB3/SPDL1/CCNB1/CENPE/SKA2/CDK1/KIF18A/CENPP/STAG1/NUP43
R-HSA-2426168	Activation of gene expression by SREBF (SREBP)	42	0.582645	1.70481	0.00251633	0.0403452	0.0367885	2727	tags=40%, list=18%, signal=33%	SQLE/CYP51A1/LSS/GPAM/CARM1/FASN/HMGCR/IDI1/ACACA/HMGCS1/SC5D/SREBF2/MVD/DHCR7/SMARCD3/FDFT1/MVK
R-HSA-9648025	EML4 and NUDC in mitotic spindle formation	108	0.489782	1.6841	0.000609243	0.0133203	0.012146	2228	tags=23%, list=15%, signal=20%	CENPA/NUF2/PLK1/PMF1-BGLAP/NDC80/CENPF/AURKB/KIF2C/BUB1/DYNC1I1/BIRC5/RPS27/ERCC6L/CENPO/SPC24/SGO2/TUBB6/CENPQ/DYNC1I2/CENPI/TUBB3/SPDL1/CENPE/SKA2/NEK7
R-HSA-418555	G alpha (s) signalling events	70	0.512283	1.6767	0.00237437	0.0384967	0.035103	1635	tags=29%, list=11%, signal=26%	SCT/ADCY1/LHB/GNG11/FN1/GIP/ITGA5/ADCY4/ADCY3/GNB4/DRD1/ADCY7/ITGB1/ADCY5/SCTR/PDE4A/PDE3A/GPR176/MC1R/SHC1
R-HSA-9658195	Leishmania infection	125	0.461011	1.63895	0.000969314	0.0201585	0.0183814	1038	tags=16%, list=7%, signal=15%	ENTPD1/VAV1/GGT5/ADCY1/IL10/GNG11/WNT5A/ADCY4/FZD7/ADCY3/GNB4/WAS/IL1B/ADCY7/PLCG1/DVL1/MYO5A/WIPF1/ADCY5/C3
R-HSA-9824443	Parasitic Infection Pathways	125	0.461011	1.63895	0.000969314	0.0201585	0.0183814	1038	tags=16%, list=7%, signal=15%	ENTPD1/VAV1/GGT5/ADCY1/IL10/GNG11/WNT5A/ADCY4/FZD7/ADCY3/GNB4/WAS/IL1B/ADCY7/PLCG1/DVL1/MYO5A/WIPF1/ADCY5/C3
R-HSA-1630316	Glycosaminoglycan metabolism	104	0.451108	1.55082	0.00318764	0.0499974	0.0455898	1941	tags=32%, list=13%, signal=28%	DCN/BGN/LUM/FMOD/CHST6/CSPG4/CSPG5/NDST3/B3GAT2/CHST3/HMMR/HS3ST3B1/SLC26A2/CHST9/CHSY1/B3GNT4/HS3ST2/CHST15/DSE/ST3GAL6/ST3GAL2/CHST14/NDST1/GPC6/XYLT2/HYAL3/GPC4/B3GNT2/HGSNAT/HS6ST2/AGRN/SDC3/B4GALT1
R-HSA-9006934	Signaling by Receptor Tyrosine Kinases	435	0.372131	1.52345	7.29036e-05	0.00244651	0.00223083	1950	tags=17%, list=13%, signal=15%	COL1A2/COL3A1/PDGFRB/THBS2/SPARC/COL6A3/PLAT/COL5A2/COL6A2/VAV1/COL1A1/COL5A1/LAMA2/PDGFRA/FN1/FGF1/LAMA4/SHC3/ITGB3/NTF4/ANOS1/COL4A1/CXCL12/COL4A2/TPH1/PTPRS/VGF/SOCS1/EGR1/THBS1/MYCN/ITGB1/PDGFB/MAPK11/COL5A3/PLCG1/POLR2L/COL6A1/AXL/CTNNB1/SPHK1/CDK5R1/PDGFC/COL27A1/COL4A3/ADAM12/RPS6KA2/DLG4/JUNB/AP2B1/AKT3/SRF/CBL/LYL1/APOE/F3/ITPR3/HSPB1/FURIN/HIF1A/ACTB/SHC1/TNS4/GAB1/RAB4B/COL4A4/GRB10/IT…
R-HSA-68877	Mitotic Prometaphase	193	0.405517	1.51697	0.00187923	0.0315317	0.0287519	2906	tags=22%, list=20%, signal=18%	CENPA/NUF2/PLK1/NEK2/PMF1-BGLAP/NDC80/NCAPG/CENPF/AURKB/KIF2C/BUB1/DYNC1I1/BIRC5/RPS27/ERCC6L/CENPO/SPC24/SGO2/TUBB6/HAUS5/CENPQ/DYNC1I2/CENPI/CCNB2/NME7/TUBB3/NCAPH/SPDL1/CCNB1/CENPE/SKA2/NEK7/CDK1/CETN2/TUBG2/KIF18A/CENPP/NINL/STAG1/NUP43/MZT2B/MAPRE1/YWHAE
R-HSA-195258	RHO GTPase Effectors	269	0.387295	1.5165	0.000609243	0.0133203	0.012146	3092	tags=27%, list=21%, signal=22%	CENPA/MYL9/NUF2/PLK1/PPP1R14A/PMF1-BGLAP/NDC80/FMNL1/KIF5A/DIAPH3/CENPF/AURKB/CIT/KIF14/KIF2C/BUB1/DYNC1I1/FLNA/H4C3/WAS/BIRC5/PRC1/ITGB1/MAPK11/RPS27/DVL1/WIPF1/ERCC6L/CTNNB1/CENPO/DLG4/SPC24/SGO2/TUBB6/CENPQ/SRF/H2AC20/DYNC1I2/FMNL3/CENPI/LIMK2/ACTB/LIMK1/RHOQ/TUBB3/SRGAP2/NCF2/SPDL1/ABL1/CENPE/SKA2/GOPC/MYH9/H4C5/YWHAH/ACTR3/EVL/KDM1A/KIF18A/SFN/CENPP/NUP43/ARPC1B/KDM4C/ACTG1/RHOD/MAPRE1/YWHAE…
R-HSA-9675108	Nervous system development	472	0.355281	1.46262	0.000139793	0.00429195	0.00391358	2377	tags=22%, list=16%, signal=19%	COL3A1/MYL9/COL6A3/COL5A2/COL6A2/MMP2/COL5A1/LAMA2/PRX/PLXND1/SHC3/POU3F1/ITGA5/ITGB3/SCN9A/CLTCL1/CACNB2/NRTN/COL4A1/CXCL12/DPYSL3/CYP51A1/ITGA10/PAK6/COL4A2/CACNB1/EPHB2/TRPC1/UNC5A/EFNB3/SLIT3/ITGB1/DPYSL4/MAPK11/RPL38/COL5A3/RPS27/PLCG1/PIK3CD/COL6A1/RPL37A/RPS26/SEMA7A/SPTBN5/RPL37/RPS29/SEM1/RPL36A/CDK5R1/EFNA5/CACNA1H/RPL41/COL4A3/PLXNA3/RPS6KA2/DLG4/RPS28/RPL39/RPS21/ABLIM3/ELOB/TUBB6/AP2…
R-HSA-422475	Axon guidance	451	0.351365	1.44147	0.000306472	0.00789714	0.00720095	2831	tags=26%, list=19%, signal=22%	COL3A1/MYL9/COL6A3/COL5A2/COL6A2/MMP2/COL5A1/PLXND1/SHC3/ITGA5/ITGB3/SCN9A/CLTCL1/CACNB2/NRTN/COL4A1/CXCL12/DPYSL3/ITGA10/PAK6/COL4A2/CACNB1/EPHB2/TRPC1/UNC5A/EFNB3/SLIT3/ITGB1/DPYSL4/MAPK11/RPL38/COL5A3/RPS27/PLCG1/PIK3CD/COL6A1/RPL37A/RPS26/SEMA7A/SPTBN5/RPL37/RPS29/SEM1/RPL36A/CDK5R1/EFNA5/CACNA1H/RPL41/COL4A3/PLXNA3/RPS6KA2/DLG4/RPS28/RPL39/RPS21/ABLIM3/ELOB/TUBB6/AP2B1/MSN/RPL31/RPL34/RPL36/…
R-HSA-6798695	Neutrophil degranulation	376	-0.369283	-1.45482	0.000336732	0.00837766	0.00763911	2655	tags=23%, list=18%, signal=20%	GRN/FTH1/TMEM179B/CD47/PRDX6/PSMA5/CPNE3/PRDX4/SVIP/CD55/LCN2/NIT2/B2M/ADA2/CD63/APRT/DGAT1/CTSC/FTL/PSMB1/LGALS3/PYCARD/PTPRJ/SLPI/PSMA2/HSP90AA1/CST3/PFKL/NAPRT/PYGB/ALOX5/FRK/ENPP4/HEXB/TMEM63A/BST2/GSTP1/FABP5/GSN/ADAM8/LRG1/SYNGR1/ATP8A1/RAB37/CAT/MGST1/ORM2/PLAC8/ACP3/IRAG2/VNN1/ALDH3B1/TMT1A/FCER1G/SELL/SLC11A1/CYSTM1/TLR2/CD14/CTSS/CEACAM1/CTSH/PLD1/ANPEP/CFD/HPSE/FPR1/OLFM4/AOC1/PTAFR/MM…
R-HSA-425407	SLC-mediated transmembrane transport	163	-0.426658	-1.54266	0.00193183	0.0319137	0.0291003	1228	tags=18%, list=8%, signal=17%	SLC26A9/SLC7A2/SLC15A1/SLC40A1/SLC5A9/SLC28A3/SLC12A2/SLC11A1/SLC15A2/SLCO1B1/SLCO4A1/SLC6A14/SLC27A1/SLC47A2/SLC26A1/SLC2A2/SLC22A7/SLC9A2/SLC39A5/SLC3A1/SLC43A1/SLC6A20/SLC44A5/SLCO2B1/SLC9A3/SLC28A1/SLC7A9/SLC5A1/SLC9A4/SLC26A3
R-HSA-5619115	Disorders of transmembrane transporters	144	-0.439085	-1.55815	0.00162127	0.0278511	0.0253959	2645	tags=24%, list=18%, signal=20%	PSMB4/SLC29A3/PSMA5/ABCD1/PSME2/HEPH/PSMB6/ABCG5/PSMA3/PSMB1/PSMB8/SLC4A4/ABCB11/PSMA2/SLC1A1/UBB/PSMB10/ABCA1/SLC22A18/SLC40A1/ABCG8/GCKR/SLCO1B1/ABCC2/SLC6A14/NUP210/SLC2A2/SLC3A1/CFTR/SLC6A20/SLC7A9/SLC5A1/APOA1/SLC26A3
R-HSA-9609507	Protein localization	155	-0.43966	-1.58561	0.00105408	0.0205546	0.0187426	4253	tags=45%, list=29%, signal=32%	PITRM1/ATP5MC1/CHCHD3/HMGCL/BCS1L/PEX5/TIMM8A/GET3/PEX16/ACOT8/CYC1/COA6/CRAT/SERP1/CMC2/PEX6/BAAT/HSD17B4/GFER/PEX7/PAOX/HSCB/ACO2/PEX3/ECH1/DHRS4/PEX12/IDH3G/TIMM17B/CAMLG/ACOX1/HSPD1/ACBD5/COA4/MTX2/ACOX2/HMOX1/ABCD1/SCP2/FIS1/ATP5F1B/COQ2/TOMM20/VAMP2/MPV17/CHCHD2/HACL1/GSTK1/TIMM9/PAM16/UBB/PHYH/PECR/DDO/EHHADH/FXN/CHCHD10/ALDH3A2/CMC4/CAT/NUDT7/PXMP2/EPHX2/CYB5A/SLC27A2/HAO1/PIPOX/LDHD/OTC
R-HSA-1483206	Glycerophospholipid biosynthesis	105	-0.484124	-1.64819	0.00127562	0.0238912	0.021785	978	tags=20%, list=7%, signal=19%	TMEM86B/SLC44A4/STARD10/ABHD3/PEMT/PLA2G6/CHPT1/PLA2G4A/PLA2G10/PLD1/BCHE/PLAAT3/PLAAT4/GPAT3/PLAAT2/DGAT2/GPD1/SLC44A5/PLBD1/PLA2G4C/PLA2G2A
R-HSA-977225	Amyloid fiber formation	65	-0.537154	-1.67746	0.00148556	0.0264649	0.0241319	2619	tags=34%, list=18%, signal=28%	H2BC5/H2BC8/TSPAN33/B2M/H2AC8/TSPAN15/CST3/PRKN/UBB/UBE2L6/H4C14/H3C10/GSN/H2BC6/H2BC26/H2BC15/APCS/ODAM/NAT8/TTR/LYZ/APOA1
R-HSA-9709957	Sensory Perception	132	-0.476752	-1.68641	0.000229348	0.00636441	0.00580335	2275	tags=29%, list=15%, signal=25%	GNAL/PRKCA/PDE6A/PLS1/VAMP2/GUCA1B/RDH5/GRK4/AKR1C3/REEP1/LHFPL5/RGS9/GSN/DHRS9/CLIC5/BCO2/CACNA1D/EPB41L1/LRAT/BCO1/CNGA1/EPB41L3/APOB/KCNJ2/RBP4/HSD17B6/APOM/MYO7A/RDH12/FSCN2/APOA2/RDH16/AKR1B10/TTR/AKR1C4/APOC3/APOA1/RBP2
R-HSA-383280	Nuclear Receptor transcription pathway	42	-0.589899	-1.7222	0.00276227	0.0438018	0.0399403	2194	tags=43%, list=15%, signal=37%	NR4A2/RORA/NR2C1/RARB/ESR2/RARG/THRB/NR1H3/NR4A1/RORC/NR3C2/NR6A1/PPARG/HNF4G/AR/NR1H4/NR1I2/NR0B2
R-HSA-174824	Plasma lipoprotein assembly, remodeling, and clearance	63	-0.56049	-1.73655	0.000755976	0.0162817	0.0148463	730	tags=27%, list=5%, signal=26%	A2M/NR1H3/MYLIP/APOB/AMN/ANGPTL3/ALB/CREB3L3/ABCG1/ANGPTL8/APOA2/LIPC/CIDEC/CES3/MTTP/APOC3/APOA1
R-HSA-71291	Metabolism of amino acids and derivatives	328	-0.455504	-1.77704	2.19922e-07	1.98342e-05	1.80857e-05	2935	tags=34%, list=20%, signal=28%	NAGS/GRHPR/RPL13/RPL19/PSMD8/RPL5/HNMT/RPL10A/DIO3/PAPSS1/AHCY/PSMB4/PSAT1/GSTZ1/PSMA5/AIMP2/RPL14/RPS6/PSME2/PSMB6/NDUFAB1/SERINC5/RPL29/RPSA/ECHS1/PSMA3/KYNU/RPL9/GLUL/PHYKPL/HGD/GPT2/RPS9/PSMB1/RPL10/RPS2/RPS3/AUH/PSMB8/BCKDHB/PSMA2/RPS5/LIAS/TST/RPL8/RPL7A/RPS3A/MCCC2/ALDH6A1/SEPHS2/RPS4X/SEPSECS/RPL7/ETHE1/PCBD1/PSMB10/OAT/ADI1/DDO/HIBCH/CHDH/CRYM/SAT1/ASPA/SHMT1/GAMT/GLS2/CBS/ACADSB/RIMKLA/…
R-HSA-196854	Metabolism of vitamins and cofactors	173	-0.490457	-1.79135	1.2544e-05	0.000624171	0.000569146	2070	tags=25%, list=14%, signal=22%	PANK1/DCAKD/HSP90AA1/SLC19A2/MCCC2/GSTO1/AKR1C3/NAPRT/SLC23A2/NUDT12/TCN2/DHFR/PARP10/GCH1/SHMT1/MOCS1/BCO2/ACP5/NUDT8/TTPA/VNN1/NMNAT3/LRAT/BCO1/APOB/AMN/ALDH1L1/CYP8B1/CYB5A/AOX1/RBP4/SLC19A3/APOM/SLC23A1/PRSS3/BST1/APOA2/AKR1B10/TTR/TCN1/AKR1C4/APOC3/APOA1/RBP2
R-HSA-156580	Phase II - Conjugation of compounds	80	-0.553241	-1.79537	0.000255168	0.00681069	0.00621028	2729	tags=46%, list=18%, signal=38%	PAPSS1/UGT2B7/AHCY/GSTZ1/TPMT/AKR1A1/UGT1A6/GCLC/MGST2/GSTA4/GSTK1/GSTO1/NAT1/ABHD14B/GSTP1/UGT2B11/MGST1/SULT1C4/SULT1E1/SULT2B1/UGT1A4/UGT2A3/UGT2B17/GLYATL1/UGT2B28/MAT1A/SLC26A1/GGT6/NAT2/ACSM2B/SULT1C2/UGT2B15/GSTA1/UGT2B10/ACSM2A/SULT2A1/GSTA2
R-HSA-193807	Synthesis of bile acids and bile salts via 27-hydroxycholesterol	13	-0.791439	-1.80651	0.00155035	0.0272824	0.0248772	1870	tags=54%, list=13%, signal=47%	AKR1C3/CYP7B1/NR1H4/CYP8B1/CYP27A1/AKR1D1/AKR1C4
R-HSA-140877	Formation of Fibrin Clot (Clotting Cascade)	28	-0.672065	-1.80814	0.0009792	0.0201585	0.0183814	1415	tags=39%, list=10%, signal=36%	F8/TFPI/A2M/PF4/THBD/SERPIND1/F11/F10/F7/SERPINC1/KNG1
R-HSA-1482788	Acyl chain remodelling of PC	17	-0.751133	-1.81481	0.00139695	0.0251975	0.0229762	978	tags=41%, list=7%, signal=39%	PLA2G6/PLA2G4A/PLA2G10/PLAAT3/PLBD1/PLA2G4C/PLA2G2A
R-HSA-5365859	RA biosynthesis pathway	18	-0.748862	-1.83228	0.00186319	0.0315317	0.0287519	2100	tags=56%, list=14%, signal=48%	RDH5/AKR1C3/ALDH1A2/DHRS9/SDR16C5/ADH1C/ADH4/ALDH1A1/RDH16/ADH1A
R-HSA-913709	O-linked glycosylation of mucins	45	-0.627253	-1.84612	0.000474091	0.011215	0.0102263	2233	tags=42%, list=15%, signal=36%	GALNT6/ST6GALNAC3/C1GALT1/GCNT1/MUC16/GALNT12/B3GNT3/MUC1/GALNT4/MUC20/B3GNT8/MUC5B/MUCL1/CHST4/GCNT3/MUC3A/MUC6/MUC13/MUC17
R-HSA-2022377	Metabolism of Angiotensinogen to Angiotensins	11	-0.860644	-1.84755	0.000170992	0.00514045	0.00468728	1081	tags=55%, list=7%, signal=51%	ACE/ANPEP/MME/AGT/ACE2/CES1
R-HSA-977068	Termination of O-glycan biosynthesis	18	-0.760125	-1.85984	0.0012672	0.0238912	0.021785	1403	tags=50%, list=9%, signal=45%	MUC16/MUC1/MUC20/MUC5B/MUCL1/MUC3A/MUC6/MUC13/MUC17
R-HSA-9018678	Biosynthesis of specialized proresolving mediators (SPMs)	16	-0.784194	-1.86293	0.00134476	0.0245631	0.0223977	981	tags=62%, list=7%, signal=58%	LTC4S/HPGD/PTGR1/ALOX5/CYP1A1/EPHX2/CYP2C9/CYP2C8/CYP2E1/CYP3A4
R-HSA-9018677	Biosynthesis of DHA-derived SPMs	14	-0.810138	-1.86526	0.000427379	0.0102785	0.00937235	981	tags=43%, list=7%, signal=40%	CYP1A1/EPHX2/CYP2C9/CYP2C8/CYP2E1/CYP3A4
R-HSA-2453902	The canonical retinoid cycle in rods (twilight vision)	16	-0.787797	-1.87149	0.00119252	0.0229441	0.0209214	1397	tags=50%, list=9%, signal=45%	DHRS9/LRAT/RBP4/HSD17B6/MYO7A/RDH12/RDH16/TTR
R-HSA-8963899	Plasma lipoprotein remodeling	26	-0.713309	-1.89732	0.000369116	0.00902769	0.00823184	641	tags=46%, list=4%, signal=44%	APOB/ANGPTL3/ALB/CREB3L3/ABCG1/ANGPTL8/APOA2/LIPC/CIDEC/MTTP/APOC3/APOA1
R-HSA-5083632	Defective C1GALT1C1 causes TNPS	13	-0.832162	-1.89946	0.000213679	0.00616677	0.00562312	1403	tags=69%, list=9%, signal=63%	MUC16/MUC1/MUC20/MUC5B/MUCL1/MUC3A/MUC6/MUC13/MUC17
R-HSA-189445	Metabolism of porphyrins	25	-0.72755	-1.91182	0.000326353	0.00826188	0.00753354	875	tags=36%, list=6%, signal=34%	ALAS1/UGT1A4/BLVRB/SLCO1B1/ABCC2/ALB/FABP1/SLCO2B1/GSTA1
R-HSA-5083625	Defective GALNT3 causes HFTC	12	-0.862429	-1.92122	9.76399e-05	0.00318037	0.0029	1403	tags=75%, list=9%, signal=68%	MUC16/MUC1/MUC20/MUC5B/MUCL1/MUC3A/MUC6/MUC13/MUC17
R-HSA-71384	Ethanol oxidation	11	-0.896191	-1.92386	1.57623e-05	0.00073371	0.000669028	1339	tags=82%, list=9%, signal=75%	ACSS1/ALDH2/ALDH1B1/ADH1C/ADH4/ADH6/ALDH1A1/ADH1A/ADH1B
R-HSA-5083636	Defective GALNT12 causes CRCS1	12	-0.866628	-1.93058	6.73562e-05	0.00231417	0.00211016	1403	tags=83%, list=9%, signal=76%	MUC16/GALNT12/MUC1/MUC20/MUC5B/MUCL1/MUC3A/MUC6/MUC13/MUC17
R-HSA-189483	Heme degradation	14	-0.851768	-1.96111	2.619e-05	0.00104978	0.000957238	875	tags=57%, list=6%, signal=54%	UGT1A4/BLVRB/SLCO1B1/ABCC2/ALB/FABP1/SLCO2B1/GSTA1
R-HSA-2187338	Visual phototransduction	69	-0.640271	-2.03065	4.39854e-06	0.000244119	0.000222598	796	tags=38%, list=5%, signal=36%	PRKCA/PDE6A/GUCA1B/RDH5/GRK4/AKR1C3/RGS9/DHRS9/BCO2/LRAT/BCO1/CNGA1/APOB/RBP4/HSD17B6/APOM/MYO7A/RDH12/APOA2/RDH16/AKR1B10/TTR/AKR1C4/APOC3/APOA1/RBP2
R-HSA-5621480	Dectin-2 family	17	-0.853217	-2.06145	2.235e-06	0.000140222	0.000127861	1539	tags=82%, list=10%, signal=74%	PLCG2/LYN/MUC16/SYK/MUC1/FCER1G/MUC20/MUC5B/CLEC4E/MUCL1/MUC3A/MUC6/MUC13/MUC17
R-HSA-1482839	Acyl chain remodelling of PE	17	-0.855862	-2.06784	1.95368e-06	0.000128144	0.000116847	978	tags=53%, list=7%, signal=50%	PLA2G6/PLA2G4A/PLA2G10/PLAAT3/PLAAT4/PLAAT2/PLBD1/PLA2G4C/PLA2G2A
R-HSA-211981	Xenobiotics	15	-0.892145	-2.08154	5.11512e-07	4.10062e-05	3.73913e-05	1010	tags=67%, list=7%, signal=62%	CYP2S1/CYP1A1/CYP3A5/CYP2C18/CYP2C9/CYP2C19/CYP2C8/CYP2E1/CYP3A7/CYP3A4
R-HSA-211897	Cytochrome P450 - arranged by substrate type	43	-0.720299	-2.10862	3.73672e-06	0.000215684	0.00019667	1283	tags=47%, list=9%, signal=43%	CYP7B1/TBXAS1/CYP2S1/CYP1A1/NR1H4/CYP3A5/CYP4F3/CYP2C18/CYP8B1/CYP2C9/CYP4F2/CYP4F11/CYP2C19/CYP4F12/CYP4A11/CYP2C8/CYP27A1/CYP2E1/CYP3A7/CYP3A4
R-HSA-975634	Retinoid metabolism and transport	37	-0.742406	-2.11151	3.22386e-06	0.000193834	0.000176747	1132	tags=35%, list=8%, signal=33%	BCO2/LRAT/BCO1/APOB/RBP4/APOM/APOA2/AKR1B10/TTR/AKR1C4/APOC3/APOA1/RBP2
R-HSA-6803157	Antimicrobial peptides	20	-0.853487	-2.11686	7.22536e-07	5.48747e-05	5.00371e-05	822	tags=60%, list=6%, signal=57%	RNASE7/SLC11A1/TLR1/TLR2/BPIFB1/LEAP2/CLU/REG3A/PRSS3/LYZ/ITLN1/PLA2G2A
R-HSA-6806667	Metabolism of fat-soluble vitamins	41	-0.736621	-2.14547	1.18722e-06	8.15789e-05	7.43871e-05	1132	tags=34%, list=8%, signal=32%	BCO2/TTPA/LRAT/BCO1/APOB/RBP4/APOM/APOA2/AKR1B10/TTR/AKR1C4/APOC3/APOA1/RBP2
R-HSA-9748784	Drug ADME	85	-0.699473	-2.29699	1e-10	2.06143e-08	1.8797e-08	972	tags=41%, list=7%, signal=39%	SULT1C4/SLC28A3/SULT1E1/UGT1A4/UGT2A3/UGT2B17/GLYATL1/SLCO1B1/ABCC2/SERPINA6/UGT2B28/CYP2C9/BCHE/GGT6/NAT2/CES2/SLC22A7/HSD11B1/ALB/CYP2C19/ACSM2B/UGT2B15/CYP2C8/SLCO2B1/GSTA1/UGT2B10/CYP2E1/ADH1A/HSD11B2/PCK1/ACSM2A/SULT2A1/CES1/GSTA2/CYP3A4
R-HSA-211859	Biological oxidations	163	-0.656229	-2.37272	1e-10	2.06143e-08	1.8797e-08	1339	tags=37%, list=9%, signal=34%	ACSS1/CYP7B1/TBXAS1/UGT2B11/ALDH2/ALDH1B1/MGST1/CYP2S1/CYP1A1/SULT1C4/SULT1E1/SULT2B1/UGT1A4/UGT2A3/UGT2B17/GLYATL1/CMBL/NR1H4/CYP3A5/CYP4F3/CYP2C18/CYP8B1/UGT2B28/MAT1A/CYP2C9/SLC26A1/ADH1C/CYP4F2/MAOA/CYP4F11/GGT6/AOC1/NAT2/ADH4/CES2/ALDH3A1/CYP2C19/CYP4F12/AADAC/AKR7A3/FMO3/ACSM2B/SULT1C2/UGT2B15/CYP4A11/CYP2C8/CES3/ADH6/GSTA1/UGT2B10/ALDH1A1/CYP27A1/CYP2E1/CYP3A7/ADH1A/ADH1B/ACSM2A/SULT2A1/CE…
R-HSA-9749641	Aspirin ADME	30	-0.870671	-2.37647	1e-10	2.06143e-08	1.8797e-08	875	tags=70%, list=6%, signal=66%	UGT1A4/UGT2A3/UGT2B17/GLYATL1/ABCC2/UGT2B28/CYP2C9/BCHE/CES2/SLC22A7/ALB/CYP2C19/ACSM2B/UGT2B15/CYP2C8/SLCO2B1/UGT2B10/CYP2E1/ACSM2A/CES1/CYP3A4
R-HSA-211945	Phase I - Functionalization of compounds	78	-0.752841	-2.42879	1e-10	2.06143e-08	1.8797e-08	1339	tags=49%, list=9%, signal=45%	ACSS1/CYP7B1/TBXAS1/ALDH2/ALDH1B1/CYP2S1/CYP1A1/CMBL/NR1H4/CYP3A5/CYP4F3/CYP2C18/CYP8B1/CYP2C9/ADH1C/CYP4F2/MAOA/CYP4F11/AOC1/ADH4/CES2/ALDH3A1/CYP2C19/CYP4F12/AADAC/FMO3/CYP4A11/CYP2C8/CES3/ADH6/ALDH1A1/CYP27A1/CYP2E1/CYP3A7/ADH1A/ADH1B/CES1/CYP3A4

## Sheet: S4_GSEA HEP_fibrotic_KEGG
Supplementary Dataset 4_S4: GSEA enriched in Hepatocyte cells from fibrotic compared to healthy conditions. KEGG pathways. Related to Fig.5 and Extended Data Fig.10. Filtered for p.adjust < 0.05.
ID	Description	setSize	enrichmentScore	NES	pvalue	p.adjust	qvalue	rank	leading_edge	core_enrichment
hsa04820	Cytoskeleton in muscle cells	154	0.565785	2.17686	1.49965e-09	1.00162e-07	6.4906e-08	1581	tags=29%, list=11%, signal=26%	COL3A1/COL1A2/LAMA2/DCN/DAAM2/COL1A1/COL6A2/COL5A1/COL6A3/MYL9/SGCA/BGN/TPM2/FBN1/FLNC/THBS2/MYL11/COL5A2/NID2/ITGB3/PDLIM4/COL4A1/TNNT1/ITGA5/COL4A2/ITGB6/NID1/ITGA1/COL4A4/MYOM1/COL4A3/ITGA10/FN1/ITGA3/ITGB1/COL6A1/COL4A5/ANKRD23/SUN2/SDC4/SSPN/ITGAV/FBLN1/FHL1/THBS1
hsa04933	AGE-RAGE signaling pathway in diabetic complications	84	0.603683	2.10036	5.05867e-07	1.25022e-05	8.10149e-06	1756	tags=35%, list=12%, signal=31%	MMP2/COL3A1/COL1A2/COL1A1/IL1B/IL1A/ICAM1/AGER/NFATC1/COL4A1/TGFB1/TGFB3/COL4A2/COL4A4/AKT3/COL4A3/FN1/CCL2/VEGFB/SERPINE1/COL4A5/EGR1/AGTR1/TGFBR1/CDC42/F3/STAT5A/CXCL8/STAT3
hsa04512	ECM-receptor interaction	59	0.621684	2.05424	2.1923e-05	0.000379268	0.000245769	1724	tags=47%, list=12%, signal=42%	COL1A2/LAMA2/COL1A1/SV2A/COL6A2/COL6A3/THBS2/ITGB3/COL4A1/ITGA5/COL4A2/ITGB6/ITGA1/COL4A4/COL4A3/ITGA10/FN1/LAMC2/ITGA3/ITGB1/COL6A1/TNC/COL4A5/SPP1/SDC4/ITGAV/THBS1/LAMA3
hsa05217	Basal cell carcinoma	48	0.640466	2.03603	3.38052e-05	0.000477571	0.000309469	2613	tags=46%, list=18%, signal=38%	HHIP/GLI3/GLI1/WNT7B/WNT11/WNT5A/WNT5B/SHH/TCF7L1/GLI2/WNT7A/GADD45B/CTNNB1/WNT3/PTCH1/WNT4/DVL1/KIF7/WNT10A/CDKN1A/FZD6/BMP2
hsa04510	Focal adhesion	160	0.521087	2.0112	8.18244e-08	2.83112e-06	1.83459e-06	2556	tags=34%, list=18%, signal=29%	COL1A2/LAMA2/PDGFRB/COL1A1/PDGFRA/COL6A2/COL6A3/MYL9/THBS2/MYL11/ITGB3/RASGRF1/COL4A1/ITGA5/RAC2/COL4A2/ITGB6/ITGA1/COL4A4/AKT3/COL4A3/ITGA10/FN1/LAMC2/ITGA3/ITGB1/COL6A1/VEGFB/TNC/COL4A5/SPP1/PDGFB/IGF1R/CTNNB1/VAV1/ITGAV/CDC42/THBS1/LAMA3/SHC2/VCL/ITGB8/PXN/FLNA/PIP5K1A/ZYX/PIK3CD/COL9A2/TLN1/CHAD/MAPK8/LAMB1/ACTN1/PGF/SHC3
hsa05133	Pertussis	59	0.60219	1.98983	7.05101e-05	0.000871303	0.000564611	2432	tags=39%, list=17%, signal=33%	C4A/IL1B/IL1A/C1R/C1S/NOD1/ITGA5/SERPING1/LY96/TICAM2/TLR4/ITGB1/CALML4/IRF8/C4B/FOS/CXCL8/CXCL6/IRF1/IL12A/C3/C4BPA/MAPK8
hsa05323	Rheumatoid arthritis	64	0.586958	1.97208	0.000107523	0.00120009	0.000777669	1907	tags=38%, list=13%, signal=33%	IL1B/IL1A/MMP3/CTSK/ITGAL/CXCL12/ICAM1/HLA-DQB1/TGFB1/MMP1/CSF1/TGFB3/ATP6V0C/ATP6V1C2/CXCL1/CXCL2/CCL2/TLR4/IL11/FOS/CCL20/CXCL8/CXCL6/HLA-DPA1
hsa04974	Protein digestion and absorption	54	0.600148	1.95504	0.000103133	0.00118947	0.000770787	1060	tags=37%, list=7%, signal=34%	COL3A1/COL8A1/COL1A2/COL1A1/COL6A2/COL7A1/COL5A1/COL6A3/COL12A1/COL5A2/SLC7A8/COL4A1/COL16A1/KCNN4/COL4A2/COL4A4/COL4A3/COL15A1/COL6A1/COL4A5
hsa05205	Proteoglycans in cancer	165	0.501418	1.9419	2.649e-07	7.05043e-06	4.56873e-06	2488	tags=28%, list=17%, signal=24%	MMP2/COL1A2/DCN/COL1A1/TWIST2/LUM/ITGB3/TWIST1/IGF2/WNT7B/TIMP3/HIF1A/ITGA5/TGFB1/WNT11/WNT5A/WNT5B/SHH/AKT3/PLAU/FN1/WNT7A/TLR4/ITGB1/IGF1R/CTNNB1/WNT3/VAV1/SDC4/ITGAV/CDC42/PTCH1/WNT4/THBS1/CBL/STAT3/MSN/PXN/SLC9A1/ANK1/FLNA/HBEGF/PIK3CD/IQGAP1/WNT10A/CDKN1A/FZD6
hsa05146	Amoebiasis	71	0.566786	1.93387	3.45065e-05	0.000477571	0.000309469	1060	tags=30%, list=7%, signal=28%	COL3A1/COL1A2/LAMA2/COL1A1/IL1B/C9/COL4A1/TGFB1/TGFB3/IL1R1/COL4A2/C8B/CXCL1/COL4A4/COL4A3/SERPINB9/CXCL2/FN1/LAMC2/TLR4/COL4A5
hsa04926	Relaxin signaling pathway	94	0.533222	1.89225	2.84807e-05	0.000428448	0.000277638	3591	tags=41%, list=25%, signal=31%	MMP2/COL3A1/COL1A2/COL1A1/CREB3L1/GNG11/COL4A1/TGFB1/MMP1/COL4A2/COL4A4/AKT3/COL4A3/VEGFB/COL4A5/ADCY7/TGFBR1/FOS/CREB3L3/SHC2/GNB4/PLCB1/PIK3CD/MAPK8/SHC3/GNG5/ADCY9/GNB5/SHC1/PRKCA/SRC/JUN/PIK3CA/ATF2/SOS2/MAPK11/ADCY6/PRKACA/GNB1
hsa05144	Malaria	26	0.643714	1.82119	0.00219821	0.0126763	0.00821435	2097	tags=54%, list=14%, signal=46%	GYPC/IL1B/ITGAL/THBS2/ICAM1/TGFB1/TGFB3/PECAM1/CCL2/TLR4/THBS1/CXCL8/IL12A/CD40
hsa05412	Arrhythmogenic right ventricular cardiomyopathy	56	0.549409	1.8071	0.000679662	0.00511224	0.00331277	1452	tags=29%, list=10%, signal=26%	LAMA2/GJA1/CACNB1/SGCA/ITGB3/ITGA5/ITGB6/ITGA1/TCF7L1/ITGA10/ITGA3/ITGB1/CTNNB1/CDH2/SSPN/ITGAV
hsa04630	JAK-STAT signaling pathway	95	0.504547	1.78532	0.000196123	0.00205117	0.00132918	3394	tags=45%, list=23%, signal=35%	PDGFRB/SOCS1/SOCS3/PDGFRA/CTF1/IL20RA/OSMR/IL7/SOCS2/AKT3/IL2RG/CISH/LIFR/IL10RB/IL11/IL4R/PDGFB/IL6ST/IFNLR1/IL15RA/JAK3/FHL1/STAT5A/STAT2/CLCF1/STAT3/EPOR/IL12A/SOCS6/PIK3CD/CDKN1A/MCL1/IRF9/IFNGR2/CSF2/SOCS5/PIAS3/CCND3/PIK3CA/STAT6/SOS2/SOCS4/PTPN6
hsa00532	Glycosaminoglycan biosynthesis - chondroitin sulfate / dermatan sulfate	20	0.681	1.7826	0.00350699	0.0183851	0.0119137	3061	tags=65%, list=21%, signal=51%	CHSY3/CHSY1/CHST11/CHST3/CSGALNACT2/DSE/CHST15/CHST14/CHST12/XYLT1/CHPF2/B3GALT6/CSGALNACT1
hsa04151	PI3K-Akt signaling pathway	249	0.433943	1.76431	2.4012e-06	5.1926e-05	3.36485e-05	1797	tags=23%, list=12%, signal=20%	LPAR1/COL1A2/LAMA2/PDGFRB/COL1A1/PDGFRA/COL6A2/COL6A3/CREB3L1/EFNA5/THBS2/ITGB3/IGF2/NRTN/OSMR/IL7/GNG11/COL4A1/ITGA5/CSF1/COL4A2/ITGB6/BCL2L11/ITGA1/COL4A4/AKT3/COL4A3/ITGA10/IL2RG/FN1/EFNA1/LAMC2/TLR4/ITGA3/FGF1/ITGB1/COL6A1/VEGFB/TNC/EFNA3/LPAR5/COL4A5/SPP1/IL4R/PDGFB/IGF1R/PPP2R3A/ITGAV/JAK3/DDIT4/THBS1/ANGPT2/CDK2/CREB3L3/LAMA3/EPOR/EFNA2
hsa04340	Hedgehog signaling pathway	47	0.556685	1.76425	0.00147478	0.00962778	0.00623887	2929	tags=40%, list=20%, signal=32%	HHIP/GLI3/GAS1/GLI1/EVC2/SHH/GLI2/CDON/PTCH1/SMURF1/KIF7/FBXW11/CSNK1G2/EVC/GPR161/IQCE/CSNK1D/MGRN1/SMURF2
hsa04064	NF-kappa B signaling pathway	83	0.505878	1.76098	0.000437528	0.00366531	0.00237515	901	tags=20%, list=6%, signal=19%	IL1B/CXCL12/TNFSF14/ICAM1/TRAF5/CSNK2A3/LBP/CARD11/LY96/IL1R1/CXCL1/PLAU/TICAM2/CXCL2/TLR4/GADD45B/TRAF2
hsa04916	Melanogenesis	69	0.517307	1.74603	0.00118266	0.00802355	0.00519932	1712	tags=23%, list=12%, signal=21%	TYRP1/MC1R/CREB3L1/WNT7B/WNT11/WNT5A/WNT5B/TCF7L1/WNT7A/CTNNB1/ADCY7/WNT3/CALML4/WNT4/DVL1/CREB3L3
hsa05321	Inflammatory bowel disease	35	0.581485	1.72599	0.002789	0.0148461	0.00962035	1988	tags=46%, list=14%, signal=40%	IL1B/IL1A/TLR5/HLA-DQB1/NFATC1/TGFB1/TGFB3/IL2RG/TLR4/IL4R/IL18R1/MAF/STAT3/HLA-DPA1/SMAD3/IL12A
hsa05165	Human papillomavirus infection	264	0.413186	1.69254	8.66893e-06	0.000166636	0.000107981	2547	tags=25%, list=18%, signal=21%	COL1A2/LAMA2/PDGFRB/COL1A1/COL6A2/COL6A3/CREB3L1/THBS2/ITGB3/WNT7B/COL4A1/ITGA5/COL4A2/ATP6V0C/NOTCH3/ITGB6/ATP6V1C2/WNT11/NOTCH4/ITGA1/WNT5A/COL4A4/WNT5B/AKT3/COL4A3/TCF7L1/ITGA10/FN1/LAMC2/WNT7A/ITGA3/ITGB1/COL6A1/TNC/COL4A5/SPP1/CTNNB1/WNT3/LLGL1/PPP2R3A/ITGAV/CDC42/MAML2/JAG1/WNT4/THBS1/DVL1/CDK2/STAT2/HES1/CREB3L3/LAMA3/IRF1/ITGB8/PXN/IKBKB/IKBKE/PIK3CD/COL9A2/CHAD/WNT10A/NHERF1/CDKN1A/LAMB1…
hsa05032	Morphine addiction	44	0.539395	1.67367	0.00376477	0.0188784	0.0122333	3591	tags=45%, list=25%, signal=34%	PDE3A/KCNJ6/GABBR1/GNG11/PDE11A/DRD1/CACNA1A/PDE4D/GABRB3/ADCY7/PDE4A/GNB4/GNG5/ADCY9/GNB5/PRKCA/PDE7A/ADCY6/PRKACA/GNB1
hsa04380	Osteoclast differentiation	95	0.471521	1.66846	0.00110982	0.00799996	0.00518403	3812	tags=43%, list=26%, signal=32%	SOCS1/SOCS3/IL1B/IL1A/CTSK/ITGB3/NFATC1/TGFB1/JUNB/CSF1/IL1R1/NCF2/AKT3/FOSL2/TRAF2/TGFBR1/FOS/STAT2/PPARG/FOSB/IKBKB/PIK3CD/MAPK8/IRF9/IFNGR2/FHL2/RELB/ITPR3/TNFRSF11B/JUN/CHUK/MAP3K14/PIK3CA/NFKB2/MAPK11/TAB1/TYK2/ATP2A2/CYLD/MAP3K7/TNFRSF1A
hsa05414	Dilated cardiomyopathy	62	0.497735	1.65522	0.00639974	0.0295241	0.0191318	1452	tags=26%, list=10%, signal=23%	LAMA2/CACNB1/SGCA/TPM2/ITGB3/ITGA5/TGFB1/TGFB3/ITGB6/ITGA1/ITGA10/ITGA3/ITGB1/ADCY7/SSPN/ITGAV
hsa05145	Toxoplasmosis	86	0.462675	1.60643	0.00524084	0.0254009	0.01646	2724	tags=29%, list=19%, signal=24%	LAMA2/BIRC7/SOCS1/HLA-DQB1/CIITA/TGFB1/LY96/TGFB3/AKT3/LAMC2/TLR4/IL10RB/ITGB1/LAMA3/STAT3/HLA-DPA1/IL12A/IKBKB/CD40/HSPA1L/HLA-DRA/MAPK8/LAMB1/LDLR/IFNGR2
hsa04024	cAMP signaling pathway	122	0.43244	1.60532	0.00162533	0.0102248	0.00662574	1736	tags=23%, list=12%, signal=20%	HHIP/PDE3A/GLI3/EDNRA/MYL9/LHB/CREB3L1/GLI1/GABBR1/DRD1/NFATC1/RAC2/ARAP3/AKT3/PDE4D/GIPR/GRIN2B/ADCY7/CALML4/VAV1/FOS/PLD2/PTCH1/FXYD2/PDE4A/VIP/CREB3L3/OXT
hsa04670	Leukocyte transendothelial migration	80	0.459675	1.59925	0.00374809	0.0188784	0.0122333	1278	tags=20%, list=9%, signal=18%	MMP2/THY1/MYL9/ITGAL/MYL11/CXCL12/ICAM1/CLDN11/RAC2/NCF2/PECAM1/ESAM/ITGB1/CLDN14/CTNNB1/VAV1
hsa04668	TNF signaling pathway	104	0.440689	1.58915	0.00213951	0.0126568	0.00820172	2024	tags=28%, list=14%, signal=24%	SOCS3/IL1B/MMP3/CREB3L1/ICAM1/TRAF5/BCL3/MMP14/JUNB/CSF1/CXCL1/AKT3/CXCL2/CCL2/CEBPB/TRAF2/MAP3K8/ADAM17/FOS/IL18R1/JAG1/CCL20/CREB3L3/CXCL6/RHBDF2/TNFAIP3/IRF1/RPS6KA4/IKBKB
hsa04721	Synaptic vesicle cycle	53	0.490899	1.58667	0.00768724	0.0344083	0.0222968	2493	tags=32%, list=17%, signal=27%	SYT1/STX1A/SNAP25/CACNA1A/ATP6V0C/ATP6V1C2/SLC1A7/SLC6A12/CLTCL1/DNM1/AP2B1/SLC6A13/DNM3/NSF/STXBP1/STX2/SLC6A9
hsa04060	Cytokine-cytokine receptor interaction	132	0.421372	1.58454	0.00127719	0.00849824	0.00550692	2178	tags=37%, list=15%, signal=32%	IL1B/IL1A/CCR1/CTF1/CXCL12/TNFSF14/IL20RA/OSMR/IL7/GDF7/CXCL14/TGFB1/RELT/CSF1/TGFB3/IL1R1/CXCL1/INHBE/IL2RG/CXCL2/LIFR/CCL2/BMP8A/IL10RB/PF4V1/IL1RN/IL11/IL4R/IL6ST/IFNLR1/GDF11/TGFBR1/IL15RA/IL18R1/ACVR2B/CCL20/CLCF1/CXCL8/PPBP/CXCL6/EPOR/TNFSF15/TNFRSF25/ACVR1/IL12A/RELL1/CD40/IL17RC/TNFSF10
hsa04658	Th1 and Th2 cell differentiation	58	0.472529	1.55934	0.0100489	0.0424015	0.0274765	3681	tags=50%, list=25%, signal=37%	HLA-DQB1/NFATC1/NOTCH3/IL2RG/IL4R/FOS/JAK3/LAT/MAF/MAML2/JAG1/STAT5A/HLA-DPA1/NFKBIE/IL12A/IKBKB/HLA-DRA/MAPK8/IFNGR2/NOTCH2/MAML1/JUN/CHUK/PLCG1/RBPJ/STAT6/MAPK11/NOTCH1/TYK2
hsa04659	Th17 cell differentiation	71	0.455329	1.55358	0.0094976	0.04057	0.0262897	3220	tags=42%, list=22%, signal=33%	IL1B/HLA-DQB1/NFATC1/HIF1A/TGFB1/IL1R1/IL2RG/RUNX1/IL4R/IL6ST/TGFBR1/FOS/JAK3/LAT/STAT5A/STAT3/HLA-DPA1/SMAD3/NFKBIE/IKBKB/RARA/HLA-DRA/MAPK8/RXRB/RORA/IFNGR2/JUN/CHUK/PLCG1/STAT6
hsa04611	Platelet activation	88	0.445867	1.55332	0.00665845	0.0303135	0.0196433	1502	tags=16%, list=10%, signal=14%	COL3A1/COL1A2/COL1A1/PRKG1/ITGB3/FERMT3/GUCY1A2/AKT3/FGG/ITGB1/FGA/ADCY7/FGB/GUCY1B1
hsa04022	cGMP-PKG signaling pathway	107	0.420606	1.5203	0.00568868	0.0269628	0.0174721	2280	tags=24%, list=16%, signal=21%	IRAG1/PRKG1/PDE3A/EDNRA/MYL9/MEF2C/CREB3L1/NFATC1/GUCY1A2/ADRA1B/AKT3/ADRA1D/KCNMB4/ADCY7/CALML4/AGTR1/NPR2/GUCY1B1/FXYD2/CREB3L3/SRF/MEF2A/ADRA2C/ATP2B4/PLCB1/GTF2I
hsa04010	MAPK signaling pathway	229	0.372335	1.49802	0.00194378	0.0117991	0.00764591	1797	tags=18%, list=12%, signal=16%	PDGFRB/IL1B/PDGFRA/IL1A/CACNB1/MEF2C/EFNA5/RASGRF1/IGF2/MECOM/NRTN/NFATC1/DUSP9/RAC2/TGFB1/CACNA1A/CSF1/TGFB3/IL1R1/MAP3K6/CDC25B/AKT3/EFNA1/GADD45B/FGF1/TRAF2/MAP3K10/VEGFB/EFNA3/MAP3K4/MAP3K8/RASGRP3/PDGFB/IGF1R/MAPK8IP3/TGFBR1/FOS/CDC42/RASGRF2/ANGPT2/SRF/EFNA2
hsa04015	Rap1 signaling pathway	154	0.387876	1.49235	0.00506501	0.0250356	0.0162233	2657	tags=27%, list=18%, signal=23%	LPAR1/PDGFRB/PDGFRA/ITGAL/EFNA5/ITGB3/RAC2/CSF1/ARAP3/AKT3/EFNA1/FGF1/ITGB1/VEGFB/EFNA3/LPAR5/RASGRP3/GRIN2B/PDGFB/IGF1R/CTNNB1/ADCY7/CALML4/VAV1/CDC42/LAT/RAP1GAP/THBS1/ANGPT2/SIPA1L2/DOCK4/EFNA2/RALGDS/PLCB1/EVL/PIK3CD/TLN1/NGF/ANGPT1/PGF/CTNND1/ADCY9
hsa05200	Pathways in cancer	394	0.348936	1.48108	0.000256037	0.00233129	0.00151069	1775	tags=22%, list=12%, signal=20%	MMP2/LPAR1/LAMA2/BIRC7/PDGFRB/HHIP/GLI3/EDNRA/PDGFRA/CXCL12/IGF2/TRAF5/GLI1/WNT7B/MECOM/IL7/PLEKHG5/EGLN2/GNG11/HIF1A/COL4A1/RAC2/TGFB1/MMP1/TGFB3/COL4A2/NOTCH3/BCL2L11/WNT11/NOTCH4/WNT5A/COL4A4/WNT5B/SHH/AKT3/COL4A3/TCF7L1/IL2RG/FN1/GLI2/LAMC2/WNT7A/GADD45B/ITGA3/FGF1/CDKN2B/TRAF2/ITGB1/ETS1/VEGFB/RUNX1/LPAR5/COL4A5/RASGRP3/IL4R/PDGFB/IGF1R/IL6ST/CTNNB1/ADCY7/WNT3/CALML4/SLC2A1/AGTR1/PIM2/TGFBR1…
hsa05415	Diabetic cardiomyopathy	160	0.369434	1.42588	0.00629599	0.029438	0.019076	2325	tags=22%, list=16%, signal=19%	MMP2/COL3A1/COL1A2/COX7A1/COL1A1/GFPT2/NDUFA4L2/CPT1B/AGER/RAC2/TGFB1/TGFB3/ATP5F1E/NCF2/AKT3/NDUFB1/NDUFA3/NDUFA1/NDUFC1/SLC2A1/AGTR1/TGFBR1/UQCR11/PTPA/NDUFB2/UQCRQ/COX7A2/SMAD3/COX7C/UQCRB/NDUFB4/PLCB1/UQCR10/PIK3CD/COX6B1/NDUFA13
hsa05171	Coronavirus disease - COVID-19	190	0.358043	1.41579	0.00839406	0.0367639	0.0238232	3421	tags=42%, list=24%, signal=32%	C4A/IL1B/MMP3/C1R/C9/C7/C1S/MMP1/CFB/C8B/RPS27/RPS29/RPL37/NRP1/FGG/CCL2/TLR4/RPL37A/RPL38/RPL39/RPS28/RPL41/RPL36A/RPS10-NUDT3/RPS26/RPL34/RPL31/RPL36/RPS21/IL6ST/FGA/AGTR1/C4B/ADAM17/FGB/FOS/RPL35A/RPLP2/STAT2/CXCL8/STAT3/RPL23/RPS17/IL12A/RPS25/IKBKB/IKBKE/RPS20/HBEGF/RPS15A/RPL35/RPS19/CGAS/C3/PIK3CD/RPL28/MAPK8/RPS15/IRF9/RPLP1/RPS8/CSF2/RPS24/C2/PRKCA/RPL21/ACE/IRF3/JUN/CHUK/PLCG1/RPL27A/RP…
hsa00052	Galactose metabolism	24	-0.605523	-1.62629	0.0115	0.0468116	0.0303343	1900	tags=29%, list=13%, signal=25%	GALM/GLA/PFKL/GALK1/G6PC1/AKR1B10/AKR1B15
hsa04914	Progesterone-mediated oocyte maturation	76	-0.489854	-1.64489	0.00278584	0.0148461	0.00962035	620	tags=18%, list=4%, signal=18%	CPEB3/AURKA/HSP90AA1/PIK3R1/PLK1/CCNB1/SPDYC/MAD2L1/CDC25A/CCNA2/BUB1/PKMYT1/CCNB2/CDK1
hsa00360	Phenylalanine metabolism	12	-0.733574	-1.66244	0.010979	0.045223	0.0293048	1339	tags=58%, list=9%, signal=53%	GOT1/MAOA/PAH/ALDH3A1/DDC/HPD/TAT
hsa00920	Sulfur metabolism	10	-0.760222	-1.66429	0.0122428	0.0492558	0.0319181	2932	tags=80%, list=20%, signal=64%	SELENBP1/SUOX/PAPSS2/MPST/PAPSS1/ETHE1/BPNT1/TST
hsa00130	Ubiquinone and other terpenoid-quinone biosynthesis	12	-0.735276	-1.6663	0.0107028	0.0446164	0.0289118	2520	tags=67%, list=17%, signal=55%	VKORC1L1/VKORC1/COQ5/COQ2/COQ3/NQO1/HPD/TAT
hsa00250	Alanine, aspartate and glutamate metabolism	33	-0.57707	-1.66771	0.00775679	0.0344083	0.0222968	2355	tags=52%, list=16%, signal=43%	ALDH5A1/GLUD2/GPT2/ASS1/PPAT/GLUD1/GOT1/NIT2/GLS2/GAD1/GPT/FOLH1/AGXT2/ASRGL1/RIMKLA/AGXT/CPS1
hsa00640	Propanoate metabolism	30	-0.591491	-1.67033	0.00879448	0.0380361	0.0246477	4470	tags=83%, list=31%, signal=58%	ECHDC1/MLYCD/ACSS3/DBT/ACACA/MCEE/SUCLA2/ABAT/DLD/MMUT/ACOX1/HADHA/ACACB/ACADS/PCCA/LDHB/SUCLG2/BCKDHB/SUCLG1/HIBCH/LDHC/EHHADH/ALDH6A1/PCCB/ECHS1
hsa01210	2-Oxocarboxylic acid metabolism	30	-0.609398	-1.7209	0.00528574	0.0254009	0.01646	3194	tags=57%, list=22%, signal=44%	IDH3A/PDHA1/IDH3G/DHTKD1/DLD/ACO2/GPT2/ABHD14A-ACY1/NAGS/AADAT/BCAT1/GOT1/BCKDHB/ACY1/GPT/AGXT2/AGXT
hsa00020	Citrate cycle (TCA cycle)	28	-0.629472	-1.74025	0.00356247	0.0183972	0.0119215	3878	tags=64%, list=27%, signal=47%	PDHB/SDHC/SUCLA2/IDH3A/PDHA1/SDHD/IDH3G/DLD/ACO2/SDHA/SUCLG2/FH/MDH2/MDH1/SDHB/SUCLG1/PCK2/PCK1
hsa00380	Tryptophan metabolism	34	-0.601418	-1.75782	0.00255925	0.0142823	0.00925503	3094	tags=71%, list=21%, signal=56%	HAAO/ALDH8A1/ACAT2/ALDH9A1/ACMSD/DHTKD1/AOX1/DLD/HADHA/ALDH3A2/AADAT/GCDH/ALDH7A1/MAOA/ACAT1/CAT/EHHADH/ALDH2/HADH/ALDH1B1/ECHS1/CYP1A2/TDO2/DDC
hsa03440	Homologous recombination	39	-0.59506	-1.76667	0.00230333	0.0130648	0.0084661	672	tags=21%, list=5%, signal=20%	BRCA2/XRCC3/BRCA1/XRCC2/BRIP1/BLM/RAD51/RAD54B
hsa04114	Oocyte meiosis	96	-0.504652	-1.7712	0.000444922	0.00366531	0.00237515	998	tags=20%, list=7%, signal=19%	ANAPC2/PPP3CC/CPEB3/AURKA/CCNE1/ITPR2/CCNE2/ESPL1/PTTG1/PLK1/CCNB1/SPDYC/MAD2L1/SGO1/BUB1/PKMYT1/CCNB2/CDK1/CDC20
hsa01524	Platinum drug resistance	66	-0.547404	-1.7921	0.000507325	0.0040822	0.00264529	2699	tags=33%, list=19%, signal=27%	MSH2/TP53/MGST2/SLC31A1/BCL2/BID/GSTP1/CYCS/GSTM4/GSTA4/MGST3/GSTM3/PIK3R1/GSTO1/ABCC2/BRCA1/GSTO2/MGST1/TOP2A/BIRC5/GSTA1/GSTA2
hsa00330	Arginine and proline metabolism	40	-0.603268	-1.80871	0.00215824	0.0126568	0.00820172	2411	tags=52%, list=17%, signal=44%	ALDH18A1/ODC1/PYCR1/ALDH3A2/SRM/AGMAT/CKB/GOT1/ALDH7A1/OAT/MAOA/HOGA1/L3HYPDH/ALDH2/ALDH1B1/GATM/CKMT1B/PRODH2/CKMT1A/DAO/ARG1
hsa00053	Ascorbate and aldarate metabolism	22	-0.689316	-1.81432	0.0027726	0.0148461	0.00962035	2001	tags=59%, list=14%, signal=51%	RGN/AKR1A1/ALDH3A2/UGT2B7/ALDH7A1/UGT1A9/UGT1A4/ALDH2/ALDH1B1/UGT2B17/UGT2B15/UGT2B10/UGT2B11
hsa00770	Pantothenate and CoA biosynthesis	20	-0.707311	-1.81901	0.00161336	0.0102248	0.00662574	2077	tags=40%, list=14%, signal=34%	PPCDC/ALDH3A2/BCAT1/DPYS/ALDH2/ALDH1B1/ENPP3/UPB1
hsa04978	Mineral absorption	39	-0.613194	-1.82051	0.00116434	0.00802355	0.00519932	1108	tags=31%, list=8%, signal=29%	ATP1B1/STEAP2/STEAP1/CLCN2/FTL/MT1F/MT1E/MT1M/MT1G/SLC26A3/SLC5A1/MT1H
hsa04964	Proximal tubule bicarbonate reclamation	16	-0.747758	-1.82425	0.0011688	0.00802355	0.00519932	2111	tags=62%, list=15%, signal=53%	GLUD2/GLUD1/MDH1/ATP1B1/GLS2/PCK2/SLC25A10/CA2/PCK1/SLC38A3
hsa03460	Fanconi anemia pathway	51	-0.584539	-1.83616	0.000840273	0.00618584	0.00400847	3242	tags=41%, list=22%, signal=32%	CENPS/FAN1/ATRIP/FANCA/FANCC/RAD51C/FANCF/FANCB/CENPX/EME2/RMI1/FANCG/FANCD2/BRCA2/BRCA1/FANCI/UBE2T/BRIP1/BLM/RAD51/RMI2
hsa00010	Glycolysis / Gluconeogenesis	53	-0.595236	-1.88575	0.00021021	0.00205117	0.00132918	1956	tags=36%, list=13%, signal=31%	AKR1A1/ALDH3A2/GALM/LDHB/PFKL/G6PC1/ALDH7A1/LDHC/FBP1/ALDOB/PKLR/ALDH2/PCK2/ALDH1B1/ADH1A/ALDH3A1/ADH1C/ADH1B/PCK1
hsa00670	One carbon pool by folate	36	-0.641036	-1.8933	0.00176377	0.0108976	0.0070617	2451	tags=53%, list=17%, signal=44%	DLD/SHMT1/GCSH/MAT1A/GLDC/SHMT2/ATIC/MTHFD1/DMGDH/CBS/ALDH7A1/AHCY/CTH/BHMT/DHFR/FTCD/ALDH1L1/SARDH/GNMT
hsa00790	Folate biosynthesis	22	-0.720989	-1.89769	0.000660777	0.00508064	0.00329229	1492	tags=45%, list=10%, signal=41%	PTS/MOCS2/AKR1C3/CBR1/AKR1C8/DHFR/PCBD1/PAH/AKR1B10/AKR1B15
hsa00270	Cysteine and methionine metabolism	46	-0.613246	-1.90079	0.000440324	0.00366531	0.00237515	3244	tags=63%, list=22%, signal=49%	SMS/ENOPH1/APIP/SDSL/MTR/GSS/MPST/MAT1A/GCLM/LDHB/SRM/BCAT1/MDH2/TST/MDH1/GOT1/CDO1/CBS/PSAT1/ADI1/AHCY/CTH/BHMT/LDHC/GCLC/PHGDH/AGXT2/GNMT/TAT
hsa04977	Vitamin digestion and absorption	21	-0.726994	-1.90547	0.000657022	0.00508064	0.00329229	1325	tags=33%, list=9%, signal=30%	MMACHC/LRAT/SLC23A1/TCN2/FOLH1/APOA1/RBP2
hsa00040	Pentose and glucuronate interconversions	28	-0.696444	-1.9254	0.000209707	0.00205117	0.00132918	1114	tags=43%, list=8%, signal=40%	AKR1A1/UGT2B7/UGT1A9/UGT1A4/DCXR/UGT2B17/DHDH/UGT2B15/UGT2B10/UGT2B11/AKR1B10/AKR1B15
hsa01240	Biosynthesis of cofactors	139	-0.519545	-1.9347	6.32039e-06	0.000128639	8.33587e-05	2520	tags=37%, list=17%, signal=31%	VKORC1/NADK/DLD/COQ5/MPI/SHMT1/COQ2/NAPRT/MAT1A/PPCDC/GCLM/RGN/AKR1A1/ALDH3A2/AK6/NME3/CTPS1/COX10/SHMT2/ALAS1/UGT2B7/EPRS1/BCAT1/PTS/MOCS2/MTHFD1/AK2/AK4/LIAS/AK9/OXSM/NME1/PSAT1/UGT1A9/BCO1/UGT1A4/GCLC/DHFR/COQ3/ALDH2/RDH12/ALDH1B1/SDR16C5/UGT2B17/TDO2/NQO1/ASPDH/UGT2B15/UGT2B10/UGT2B11/HSD17B6/HPD
hsa00071	Fatty acid degradation	39	-0.652185	-1.93627	0.000213417	0.00205117	0.00132918	3550	tags=85%, list=24%, signal=64%	ACAT2/ALDH9A1/CPT1A/ACSL1/ACSL3/ACADM/HADHB/ACAA1/ADH4/ACOX1/HADHA/ADH6/ACADS/ALDH3A2/CPT2/ACAA2/ECI2/GCDH/CYP2U1/ECI1/ALDH7A1/ACAT1/EHHADH/ALDH2/ACADL/ACADSB/HADH/ALDH1B1/ECHS1/ADH1A/ACSL6/ADH1C/ADH1B
hsa00480	Glutathione metabolism	46	-0.625475	-1.93869	0.000247548	0.0023149	0.00150008	3275	tags=59%, list=23%, signal=46%	GPX3/SMS/GSTK1/GGCT/GSS/MGST2/ODC1/OPLAH/GSTP1/GCLM/SRM/GGT1/GSTM4/GSTA4/CHAC2/PRDX6/MGST3/GSTM3/GSTO1/GPX2/GCLC/NAT8/GSTO2/MGST1/RRM2/GSTA1/GSTA2
hsa04146	Peroxisome	78	-0.580714	-1.95609	2.51993e-05	0.000396317	0.000256816	2439	tags=58%, list=17%, signal=48%	PEX7/PEX6/PEX1/ACSL1/ACSL3/GNPAT/GSTK1/HSD17B4/EPHX2/ACAA1/ACOX1/MPV17/CRAT/NUDT12/SOD1/BAAT/HAO1/PEX16/XDH/PEX11A/PEX3/ECH1/PEX11G/PXMP4/ACOX2/ECI2/ACOT8/NUDT13/PHYH/PRDX1/HACL1/PEX12/CAT/DHRS4/EHHADH/MPV17L/PECR/PXMP2/NUDT7/PIPOX/HAO2/SLC27A2/ACSL6/DAO/AGXT
hsa00220	Arginine biosynthesis	19	-0.776786	-1.96151	0.000281576	0.00249808	0.00161878	2111	tags=68%, list=15%, signal=59%	GLUD2/GPT2/ABHD14A-ACY1/ASS1/GLUD1/NAGS/GOT1/GLS2/ACY1/GPT/CPS1/OTC/ARG1
hsa00650	Butanoate metabolism	23	-0.745979	-1.97531	9.20408e-05	0.00109814	0.000711604	2581	tags=74%, list=18%, signal=61%	L2HGDH/ACSM5/HADHA/ALDH5A1/OXCT1/ACADS/ACAT1/HMGCS1/GAD1/EHHADH/HADH/BDH1/ACSM2B/ECHS1/ACSM3/HMGCS2/ACSM2A
hsa01230	Biosynthesis of amino acids	64	-0.610456	-1.97964	3.91788e-05	0.000521379	0.000337858	2411	tags=44%, list=17%, signal=37%	ALDH18A1/PYCR1/SHMT1/TKT/MAT1A/ACO2/GPT2/ABHD14A-ACY1/ASS1/PSPH/PFKL/SHMT2/NAGS/BCAT1/TALDO1/GOT1/CBS/PSAT1/CTH/ACY1/ALDOB/PKLR/PHGDH/GPT/PAH/CPS1/OTC/ARG1
hsa00630	Glyoxylate and dicarboxylate metabolism	31	-0.708557	-2.01303	0.000140613	0.00152038	0.000985215	2451	tags=68%, list=17%, signal=56%	DLD/MMUT/SHMT1/GCSH/HAO1/ACO2/PGP/PCCA/GLDC/SHMT2/GLYCTK/MDH2/MDH1/ACAT1/HOGA1/CAT/PCCB/GRHPR/HAO2/AGXT2/AGXT
hsa00260	Glycine, serine and threonine metabolism	34	-0.692502	-2.02404	5.97343e-05	0.000765485	0.00049604	2451	tags=74%, list=17%, signal=61%	DLD/SHMT1/GCSH/GLDC/PSPH/SHMT2/ALAS1/GLYCTK/DMGDH/CBS/ALDH7A1/PSAT1/CTH/BHMT/MAOA/PHGDH/GRHPR/GATM/GCAT/PIPOX/AGXT2/DAO/AGXT/SARDH/GNMT
hsa05207	Chemical carcinogenesis - receptor activation	147	-0.54189	-2.03516	1.66514e-07	4.80116e-06	3.11119e-06	1301	tags=20%, list=9%, signal=18%	MGST3/GSTM3/HSP90AA1/PIK3R1/GSTO1/UGT1A9/UGT1A4/ARRB2/CREB5/CYP2B6/MYC/GSTO2/MGST1/UGT2B17/EPHX1/CYP1A2/CDC6/CDC25A/NR1I3/FGF3/EPHX4/BIRC5/E2F1/UGT2B15/UGT2B10/UGT2B11/GSTA1/GSTA2/CYP3A4
hsa00620	Pyruvate metabolism	43	-0.682853	-2.08907	2.43454e-05	0.000396317	0.000256816	2451	tags=58%, list=17%, signal=48%	DLD/ADH6/ACACB/AKR1A1/ALDH3A2/LDHB/FH/MDH2/MDH1/ALDH7A1/HAGH/LDHC/ACAT1/ME1/PKLR/ALDH2/LDHD/PCK2/GRHPR/ALDH1B1/ADH1A/ACOT12/ADH1C/ADH1B/PCK1
hsa00280	Valine, leucine and isoleucine degradation	46	-0.67658	-2.09709	1.23567e-05	0.000225022	0.000145816	3924	tags=87%, list=27%, signal=64%	ACAD8/ACSF3/OXCT2/MCEE/ACAT2/ALDH9A1/MCCC2/ABAT/ACADM/HADHB/AOX1/ACAA1/IVD/DLD/MMUT/HADHA/OXCT1/ACADS/HIBADH/ALDH3A2/PCCA/MCCC1/HSD17B10/BCAT1/ACAA2/ALDH7A1/BCKDHB/HIBCH/ACAT1/HMGCS1/EHHADH/ALDH2/ALDH6A1/ACADSB/HADH/PCCB/ALDH1B1/ECHS1/AGXT2/HMGCS2
hsa00591	Linoleic acid metabolism	16	-0.86998	-2.12242	1.51807e-06	3.50169e-05	2.26912e-05	1568	tags=75%, list=11%, signal=67%	CYP2J2/PLAAT3/PLA2G4C/CYP2C19/PLA2G12B/PLAAT2/CYP2E1/PLA2G1B/CYP2C8/CYP1A2/CYP2C9/CYP3A4
hsa01200	Carbon metabolism	101	-0.609254	-2.17362	1.3807e-07	4.34293e-06	2.81425e-06	2451	tags=49%, list=17%, signal=41%	DLD/MMUT/ACOX1/SHMT1/GCSH/TKT/GLUD2/HAO1/ACO2/ACADS/PGP/GPT2/RGN/PCCA/GLDC/SDHA/ESD/PSPH/GLUD1/PFKL/SHMT2/SUCLG2/FH/GLYCTK/MDH2/MDH1/IDNK/TALDO1/GOT1/SDHB/PSAT1/SUCLG1/HIBCH/ACAT1/FBP1/CAT/ALDOB/ME1/PKLR/PHGDH/ALDH6A1/PCCB/GPT/ECHS1/HAO2/AGXT2/TKFC/AGXT/CPS1
hsa00983	Drug metabolism - other enzymes	64	-0.694717	-2.25289	5.7628e-08	2.21548e-06	1.43564e-06	2401	tags=53%, list=17%, signal=45%	UCKL1/NAT1/TPMT/UCK2/GSTP1/XDH/NME3/UGT2B7/GSTM4/GSTA4/MGST3/GSTM3/NME1/GSTO1/UGT1A9/UGT1A4/NAT2/DPYS/CYP2E1/GSTO2/MGST1/UGT2B17/CES2/TK1/CES1/UPP2/UPB1/UGT2B15/UGT2B10/UGT2B11/RRM2/GSTA1/GSTA2/CYP3A4
hsa04110	Cell cycle	148	-0.604314	-2.27351	2.515e-10	2.17547e-08	1.40972e-08	897	tags=22%, list=6%, signal=20%	CCNE2/BUB1B/SKP2/CHEK1/ESPL1/MCM5/PTTG1/MCM2/PLK1/MYC/CCNB1/ORC6/AURKB/CDC6/MCM6/MAD2L1/CDC25A/TTK/CCNA2/TRIP13/CDCA5/E2F1/SGO1/BUB1/PKMYT1/CDT1/NDC80/CCNB2/CDK1/ESCO2/CDC20/CDC45
hsa04976	Bile secretion	62	-0.713894	-2.31505	1.05959e-08	4.58271e-07	2.96963e-07	1114	tags=40%, list=8%, signal=37%	UGT1A9/ATP1B1/UGT1A4/ABCC2/ABCG8/ABCC4/ABCB1/AQP4/SLCO1B1/AQP9/UGT2B17/EPHX1/CFTR/SLC51A/NR0B2/CA2/SLC22A7/UGT2B15/UGT2B10/UGT2B11/SULT2A1/SLC22A1/SLC10A1/SLC5A1/CYP3A4
hsa00140	Steroid hormone biosynthesis	48	-0.760956	-2.37347	4.48709e-09	2.2179e-07	1.43722e-07	1294	tags=52%, list=9%, signal=48%	AKR1C2/AKR1C3/UGT1A9/HSD3B1/AKR1C1/UGT1A4/AKR1C8/DHRS11/HSD17B8/CYP2E1/AKR1D1/UGT2B17/CYP17A1/CYP1A2/CYP3A5/HSD11B2/UGT2B15/UGT2B10/AKR1C4/UGT2B11/HSD17B6/SRD5A2/HSD11B1/CYP3A7/CYP3A4
hsa00830	Retinol metabolism	52	-0.758653	-2.39449	1.73692e-09	1.00162e-07	6.4906e-08	1270	tags=58%, list=9%, signal=53%	LRAT/ALDH1A3/RDH5/UGT1A9/BCO1/CYP2S1/UGT1A4/DHRS4L2/DHRS4/CYP26B1/RDH12/PNPLA4/CYP2B6/SDR16C5/UGT2B17/CYP2C8/CYP1A2/ADH1A/CYP2C9/CYP3A5/ALDH1A1/RDH16/ADH1C/UGT2B15/UGT2B10/UGT2B11/HSD17B6/ADH1B/CYP3A7/CYP3A4
hsa00982	Drug metabolism - cytochrome P450	52	-0.787193	-2.48457	1e-10	1.15333e-08	7.47368e-09	1647	tags=62%, list=11%, signal=55%	UGT2B7/GSTM4/GSTA4/MGST3/GSTM3/GSTO1/UGT1A9/UGT1A4/MAOA/FMO3/CYP2C19/CYP2B6/CYP2E1/GSTO2/FMO1/MGST1/UGT2B17/CYP2D6/CYP2C8/CYP1A2/ADH1A/CYP2C9/CYP3A5/ALDH3A1/ADH1C/UGT2B15/UGT2B10/UGT2B11/ADH1B/GSTA1/GSTA2/CYP3A4
hsa05204	Chemical carcinogenesis - DNA adducts	49	-0.804844	-2.50995	1e-10	1.15333e-08	7.47368e-09	1647	tags=65%, list=11%, signal=58%	UGT2B7/GSTM4/GSTA4/MGST3/AKR1C2/GSTM3/GSTO1/UGT1A9/CBR1/UGT1A4/CYP2C19/NAT2/CYP2E1/GSTO2/SULT1A2/MGST1/SULT1A1/UGT2B17/EPHX1/CYP2C8/CYP1A2/CYP2C9/CYP3A5/UGT2B15/UGT2B10/UGT2B11/SULT2A1/HSD11B1/GSTA1/CYP3A7/GSTA2/CYP3A4
hsa00980	Metabolism of xenobiotics by cytochrome P450	57	-0.805857	-2.57937	1e-10	1.15333e-08	7.47368e-09	1647	tags=67%, list=11%, signal=59%	UGT2B7/GSTM4/AKR7A2/GSTA4/AKR7L/CBR3/MGST3/GSTM3/GSTO1/UGT1A9/CBR1/AKR1C1/CYP2S1/UGT1A4/CYP2B6/CYP2E1/GSTO2/MGST1/UGT2B17/CYP2D6/EPHX1/CYP1A2/DHDH/ADH1A/CYP2C9/CYP3A5/AKR7A3/ALDH3A1/ADH1C/UGT2B15/UGT2B10/UGT2B11/ADH1B/SULT2A1/HSD11B1/GSTA1/GSTA2/CYP3A4

## Sheet: S5_GSEA HEP_fibrotic_GO
Supplementary Dataset 4_S5: GSEA enriched in Hepatocyte cells from fibrotic compared to healthy conditions. GO-terms pathways. Related to Fig.5 and Extended Data Fig.10. Filtered for p.adjust < 0.05.
ONTOLOGY	ID	Description	setSize	enrichmentScore	NES	pvalue	p.adjust	qvalue	rank	leading_edge	core_enrichment
MF	GO:0005201	extracellular matrix structural constituent	98	0.767773	2.74036	1e-10	1.55089e-08	1.23953e-08	1089	tags=55%, list=8%, signal=51%	MGP/POSTN/AEBP1/COL8A1/COL1A2/LAMA2/DCN/CTHRC1/CHI3L1/SPARC/PXDN/COL1A1/EFEMP2/EMILIN1/MXRA5/COL6A2/COL7A1/LTBP2/HMCN1/COL5A1/PCOLCE/COL6A3/IGFBP7/LUM/MFAP2/BGN/COL12A1/FBLN5/FBN1/THBS2/COL5A2/NID2/EFEMP1/COL4A1/COL16A1/VWA1/MFAP5/COL4A2/NID1/COL4A4/COL4A3/COL15A1/FN1/LAMC2/FGG/LTBP1/COL6A1/ABI3BP/TNC/COL4A5/LTBP4/EMILIN2/FGA/TGFBI
CC	GO:0005581	collagen trimer	39	0.841792	2.58804	1e-10	1.55089e-08	1.23953e-08	1044	tags=64%, list=8%, signal=59%	COL8A1/COL1A2/CTHRC1/COL1A1/EMILIN1/COL6A2/COL7A1/COL5A1/COL6A3/LUM/COL12A1/COL5A2/LOX/COLEC11/COLEC12/COL4A1/COL16A1/COL4A2/COL4A4/COL4A3/COL15A1/C1QL1/COL6A1/COL4A5/EMILIN2
CC	GO:0005604	basement membrane	67	0.735288	2.48951	1e-10	1.55089e-08	1.23953e-08	1089	tags=46%, list=8%, signal=43%	AMTN/COL8A1/LAMA2/SPARC/PXDN/EFEMP2/COL7A1/HMCN1/COL5A1/LOXL1/FBN1/EFNA5/THBS2/NID2/CCDC80/ADAMTS1/TIMP3/COL4A1/VWA1/COL4A2/NID1/COL4A4/COL4A3/COL15A1/FN1/LAMC2/P3H2/TNC/COL4A5/TIMP1/TGFBI
MF	GO:0030020	extracellular matrix structural constituent conferring tensile strength	24	0.880082	2.44063	3.57556e-10	4.53706e-08	3.6262e-08	928	tags=71%, list=7%, signal=66%	COL8A1/COL1A2/COL1A1/COL6A2/COL7A1/COL5A1/COL6A3/COL12A1/COL5A2/COL4A1/COL16A1/COL4A2/COL4A4/COL4A3/COL15A1/COL6A1/COL4A5
BP	GO:0030199	collagen fibril organization	44	0.782081	2.43584	4.74586e-10	5.91453e-08	4.72713e-08	403	tags=41%, list=3%, signal=40%	AEBP1/COL1A2/PXDN/COL1A1/ADAMTS14/EFEMP2/EMILIN1/DDR2/COL5A1/LUM/COL12A1/LOXL1/COL5A2/FOXC2/LOX/ADAMTS2/FKBP10/FOXC1
BP	GO:0045229	external encapsulating structure organization	209	0.612095	2.43546	1e-10	1.55089e-08	1.23953e-08	1372	tags=38%, list=10%, signal=35%	PDPN/MMP2/POSTN/AEBP1/COL8A1/COL1A2/LAMA2/ANTXR1/FAP/PXDN/COL1A1/ADAMTS14/EFEMP2/CRISPLD2/EMILIN1/OLFML2B/PDGFRA/DDR2/COL7A1/HMCN1/COL5A1/LUM/MMP3/CTSK/COL12A1/LOXL1/FBLN5/CREB3L1/COL5A2/NID2/FOXC2/ITGB3/CCDC80/ADAMTS1/LOX/ADAMTS2/HAS2/FKBP10/ENG/FOXC1/BCL3/COL4A1/MMP14/ADAMTS9/ADAMTS6/COL16A1/TGFB1/VWA1/ADAMTS10/MMP1/MMP17/COL4A2/PHLDB1/ADAMTS16/NID1/FLRT2/COL4A4/COL4A3/COL15A1/SULF1/ADAMTS7/ITG…
BP	GO:0030198	extracellular matrix organization	208	0.610986	2.42999	1e-10	1.55089e-08	1.23953e-08	1372	tags=38%, list=10%, signal=35%	PDPN/MMP2/POSTN/AEBP1/COL8A1/COL1A2/LAMA2/ANTXR1/FAP/PXDN/COL1A1/ADAMTS14/EFEMP2/CRISPLD2/EMILIN1/OLFML2B/PDGFRA/DDR2/COL7A1/HMCN1/COL5A1/LUM/MMP3/CTSK/COL12A1/LOXL1/FBLN5/CREB3L1/COL5A2/NID2/FOXC2/ITGB3/CCDC80/ADAMTS1/LOX/ADAMTS2/HAS2/FKBP10/ENG/FOXC1/BCL3/COL4A1/MMP14/ADAMTS9/ADAMTS6/COL16A1/TGFB1/VWA1/ADAMTS10/MMP1/MMP17/COL4A2/PHLDB1/ADAMTS16/NID1/FLRT2/COL4A4/COL4A3/COL15A1/SULF1/ADAMTS7/ITG…
BP	GO:0043062	extracellular structure organization	208	0.610986	2.42999	1e-10	1.55089e-08	1.23953e-08	1372	tags=38%, list=10%, signal=35%	PDPN/MMP2/POSTN/AEBP1/COL8A1/COL1A2/LAMA2/ANTXR1/FAP/PXDN/COL1A1/ADAMTS14/EFEMP2/CRISPLD2/EMILIN1/OLFML2B/PDGFRA/DDR2/COL7A1/HMCN1/COL5A1/LUM/MMP3/CTSK/COL12A1/LOXL1/FBLN5/CREB3L1/COL5A2/NID2/FOXC2/ITGB3/CCDC80/ADAMTS1/LOX/ADAMTS2/HAS2/FKBP10/ENG/FOXC1/BCL3/COL4A1/MMP14/ADAMTS9/ADAMTS6/COL16A1/TGFB1/VWA1/ADAMTS10/MMP1/MMP17/COL4A2/PHLDB1/ADAMTS16/NID1/FLRT2/COL4A4/COL4A3/COL15A1/SULF1/ADAMTS7/ITG…
CC	GO:0030312	external encapsulating structure	339	0.569449	2.37231	1e-10	1.55089e-08	1.23953e-08	1443	tags=42%, list=11%, signal=38%	MGP/MMP2/AMTN/POSTN/AEBP1/COL8A1/COL1A2/LAMA2/DCN/CTHRC1/CHI3L1/SPARC/PXDN/CD248/COL1A1/ADAMTS14/EFEMP2/CRISPLD2/EMILIN1/MXRA5/OLFML2B/COL6A2/NDP/COL7A1/LTBP2/HMCN1/COL5A1/PCOLCE/COL6A3/IGFBP7/LUM/MMP3/LRRC17/MFAP2/BGN/COL12A1/LOXL1/FBLN5/SPARCL1/FBN1/EFNA5/THBS2/CXCL12/COL5A2/NID2/LRRC32/CCDC80/DMBT1/ICAM1/ADAMTS1/EFEMP1/SERPINA3/ITIH5/LOX/ADAMTS2/TGM2/ADAM19/ANGPTL4/COLEC12/TIMP3/HTRA1/IL7/COL4…
CC	GO:0031012	extracellular matrix	339	0.569449	2.37231	1e-10	1.55089e-08	1.23953e-08	1443	tags=42%, list=11%, signal=38%	MGP/MMP2/AMTN/POSTN/AEBP1/COL8A1/COL1A2/LAMA2/DCN/CTHRC1/CHI3L1/SPARC/PXDN/CD248/COL1A1/ADAMTS14/EFEMP2/CRISPLD2/EMILIN1/MXRA5/OLFML2B/COL6A2/NDP/COL7A1/LTBP2/HMCN1/COL5A1/PCOLCE/COL6A3/IGFBP7/LUM/MMP3/LRRC17/MFAP2/BGN/COL12A1/LOXL1/FBLN5/SPARCL1/FBN1/EFNA5/THBS2/CXCL12/COL5A2/NID2/LRRC32/CCDC80/DMBT1/ICAM1/ADAMTS1/EFEMP1/SERPINA3/ITIH5/LOX/ADAMTS2/TGM2/ADAM19/ANGPTL4/COLEC12/TIMP3/HTRA1/IL7/COL4…
BP	GO:0014909	smooth muscle cell migration	56	0.716792	2.36589	9.56223e-09	8.66685e-07	6.92689e-07	1022	tags=29%, list=8%, signal=26%	POSTN/LPAR1/PLAT/PDGFRB/PRKG1/DDR2/MEF2C/ITGB3/ADAMTS1/IGFBP5/HAS2/PLAU/NRP1/TLR4/SERPINE1/PDGFB
MF	GO:0050840	extracellular matrix binding	41	0.767762	2.36396	7.20196e-09	6.88527e-07	5.50298e-07	1394	tags=54%, list=11%, signal=48%	DCN/SPARC/PXDN/CD248/OLFML2B/BGN/SPARCL1/ITGB3/ADGRG1/NID1/SSC5D/SHH/ITGA3/ITGB1/SPP1/OLFML2A/LGALS1/TGFBI/LYPD3/ADAMTS15/ITGAV/THBS1
CC	GO:0062023	collagen-containing extracellular matrix	274	0.57159	2.33988	1e-10	1.55089e-08	1.23953e-08	1443	tags=42%, list=11%, signal=38%	MGP/MMP2/AMTN/POSTN/AEBP1/COL8A1/COL1A2/LAMA2/DCN/CTHRC1/SPARC/PXDN/COL1A1/EFEMP2/EMILIN1/MXRA5/COL6A2/NDP/COL7A1/LTBP2/HMCN1/COL5A1/PCOLCE/COL6A3/IGFBP7/LUM/MFAP2/BGN/COL12A1/LOXL1/FBLN5/SPARCL1/FBN1/EFNA5/THBS2/CXCL12/COL5A2/NID2/CCDC80/ICAM1/ADAMTS1/EFEMP1/SERPINA3/ITIH5/LOX/ADAMTS2/TGM2/ADAM19/ANGPTL4/COLEC12/TIMP3/HTRA1/IL7/COL4A1/ANGPTL2/ADAMTS9/HAPLN3/CSPG4/COL16A1/SERPING1/TGFB1/VWA1/ADAM…
BP	GO:0014910	regulation of smooth muscle cell migration	50	0.720567	2.32276	4.05009e-08	3.00698e-06	2.4033e-06	1022	tags=30%, list=8%, signal=28%	POSTN/LPAR1/PDGFRB/PRKG1/DDR2/MEF2C/ITGB3/ADAMTS1/IGFBP5/HAS2/PLAU/NRP1/TLR4/SERPINE1/PDGFB
BP	GO:0014812	muscle cell migration	66	0.672539	2.27546	1.99863e-08	1.64099e-06	1.31155e-06	1022	tags=24%, list=8%, signal=22%	POSTN/LPAR1/PLAT/PDGFRB/PRKG1/DDR2/MEF2C/ITGB3/ADAMTS1/IGFBP5/HAS2/PLAU/NRP1/TLR4/SERPINE1/PDGFB
BP	GO:0014911	positive regulation of smooth muscle cell migration	29	0.77869	2.25295	1.13095e-06	5.15876e-05	4.12309e-05	1022	tags=38%, list=8%, signal=35%	POSTN/LPAR1/PDGFRB/DDR2/ITGB3/ADAMTS1/IGFBP5/HAS2/NRP1/TLR4/PDGFB
BP	GO:0032964	collagen biosynthetic process	33	0.76016	2.2419	4.40126e-07	2.29664e-05	1.83556e-05	1608	tags=55%, list=12%, signal=48%	COL1A1/EMILIN1/DDR2/COL5A1/PCOLCE/CREB3L1/P3H3/CIITA/ENG/TGFB1/TGFB3/LARP6/FOSL2/RUNX1/RCN3/WNT4/TRAM2/SERPINH1
CC	GO:0098644	complex of collagen trimers	14	0.918203	2.23184	2.08316e-08	1.69051e-06	1.35112e-06	928	tags=86%, list=7%, signal=80%	COL8A1/COL1A2/COL1A1/COL7A1/COL5A1/LUM/COL5A2/COL4A1/COL4A2/COL4A4/COL4A3/COL4A5
BP	GO:1903053	regulation of extracellular matrix organization	47	0.702619	2.22842	4.16175e-07	2.25154e-05	1.79952e-05	578	tags=28%, list=4%, signal=27%	PDPN/AEBP1/LAMA2/ANTXR1/FAP/EFEMP2/EMILIN1/DDR2/ITGB3/HAS2/TGFB1/PHLDB1/NID1
BP	GO:0071559	response to transforming growth factor beta	207	0.551432	2.1905	1e-10	1.55089e-08	1.23953e-08	1786	tags=31%, list=14%, signal=28%	POSTN/COL1A2/COL1A1/PDE3A/EMILIN1/MXRA5/DDR2/NDP/LTBP2/CTSK/MEF2C/FBN1/LRRC32/PMEPA1/CHST11/LOX/ZEB1/HTRA1/ENG/ZEB2/NFATC1/SPRED3/TGFB1/TGFB3/COL4A2/ITGB6/WNT5A/NFKBIZ/WNT7A/LTBP1/ITGA3/CDKN2B/DKK3/CD109/SNX25/LTBP4/IGF1R/LRG1/FNDC4/TGFBR1/ADAM17/FOS/FURIN/NREP/ZFP36L1/SOX5/LTBP3/WNT4/THBS1/SMURF1/TGFB1I1/TWSG1/SPRED1/FERMT2/RNF111/STAT3/PPARG/LDLRAD4/SLC2A10/ITGB8/SMAD3/ACVR1/PXN/RBBP4/FERMT1
BP	GO:0032963	collagen metabolic process	72	0.640957	2.1822	2.6094e-07	1.5408e-05	1.23147e-05	1415	tags=47%, list=11%, signal=42%	MMP2/COL1A2/FAP/COL1A1/ADAMTS14/EMILIN1/DDR2/COL5A1/PCOLCE/MMP3/CTSK/CREB3L1/P3H3/ADAMTS2/MRC2/CIITA/ENG/HIF1A/MMP14/TGFB1/MMP1/MMP17/TGFB3/LARP6/FOSL2/ITGB1/RUNX1/P3H2/RCN3/FURIN/MMP10/MMP19/WNT4/TRAM2
BP	GO:0001568	blood vessel development	496	0.501506	2.1745	1e-10	1.55089e-08	1.23953e-08	2021	tags=32%, list=15%, signal=28%	HSPB6/MMP2/COL8A1/COL1A2/PLXDC1/DCN/APOD/PTK7/CHI3L1/THY1/ANTXR1/SPARC/FAP/PXDN/PDGFRB/COL1A1/EFEMP2/SOCS3/ADGRA2/GLI3/EDNRA/EMILIN1/IL1B/PDGFRA/IL1A/NDP/COL5A1/PRRX1/MEF2C/LOXL1/JCAD/TBX2/ARHGAP22/CREB3L1/THBS2/WIF1/FOXC2/ITGB3/ADAMTS1/TWIST1/LOX/PLXND1/VSTM4/WNT7B/NPR3/ANGPTL4/HAS2/FKBP10/ENG/FOXC1/HIF1A/COL4A1/MMP14/ADAMTS9/ADAMTS6/EPHB2/ITGA5/ADGRG1/CSPG4/TGFB1/JUNB/COL4A2/SPHK1/NOTCH3/PRDM1/…
MF	GO:0005518	collagen binding	53	0.665214	2.16909	3.0473e-06	0.000124562	9.95552e-05	1089	tags=42%, list=8%, signal=38%	AEBP1/ANTXR1/SPARC/DDR2/COL6A2/PCOLCE/LUM/CTSK/SPARCL1/NID2/LOX/MRC2/ADGRG1/NID1/ITGA1/ITGA10/FN1/ITGA3/ITGB1/COL6A1/PDGFB/TGFBI
BP	GO:0071560	cellular response to transforming growth factor beta stimulus	202	0.544262	2.16528	1e-10	1.55089e-08	1.23953e-08	1786	tags=31%, list=14%, signal=27%	POSTN/COL1A2/COL1A1/PDE3A/EMILIN1/DDR2/NDP/LTBP2/CTSK/MEF2C/FBN1/LRRC32/PMEPA1/CHST11/LOX/ZEB1/HTRA1/ENG/ZEB2/NFATC1/SPRED3/TGFB1/TGFB3/COL4A2/ITGB6/WNT5A/NFKBIZ/WNT7A/LTBP1/ITGA3/CDKN2B/DKK3/CD109/SNX25/LTBP4/IGF1R/LRG1/TGFBR1/ADAM17/FOS/FURIN/NREP/ZFP36L1/SOX5/LTBP3/WNT4/THBS1/SMURF1/TGFB1I1/TWSG1/SPRED1/FERMT2/RNF111/STAT3/PPARG/LDLRAD4/SLC2A10/ITGB8/SMAD3/ACVR1/PXN/RBBP4/FERMT1
BP	GO:0010718	positive regulation of epithelial to mesenchymal transition	45	0.688887	2.16054	1.5671e-06	6.96609e-05	5.56757e-05	1744	tags=42%, list=13%, signal=37%	PDPN/COL1A1/IL1B/SNAI1/TWIST1/ENG/FOXC1/TGFB1/TGFB3/CTNNB1/LRG1/TGFBR1/JAG1/LOXL2/TGFB1I1/FERMT2/SMAD3/ACVR1/WWTR1
MF	GO:0001968	fibronectin binding	22	0.802066	2.1597	1.55686e-05	0.000480767	0.000384248	1394	tags=59%, list=11%, signal=53%	MMP2/CTSK/ITGB3/CCDC80/IGFBP5/SSC5D/ITGA3/ITGB1/SDC4/ITGAV/FSTL3/FBLN1/THBS1
BP	GO:0021675	nerve development	52	0.660317	2.15377	7.63319e-06	0.000259974	0.000207782	1826	tags=50%, list=14%, signal=43%	LPAR1/GLI3/EDNRA/NDP/KCNC2/NRTN/HOXB2/POU4F1/EPHB2/SULF1/NRP1/LARGE1/SULF2/CTNNB1/KCNC1/NRP2/EGR2/NPR2/HES1/LRIG1/EXT1/SALL1/ECE1/SERPINE2/MAFB/PLXNA1
BP	GO:0048880	sensory system development	242	0.527399	2.13096	1e-10	1.55089e-08	1.23953e-08	1696	tags=29%, list=13%, signal=26%	COL8A1/THY1/PXDN/BIRC7/PDGFRB/GLI3/PDGFRA/NDP/COL5A1/MFAP2/TBX2/FBN1/COL5A2/FOXC2/EFEMP1/TWIST1/SALL2/ZEB1/DIO3/VSTM4/WNT7B/POU4F1/FOXC1/SPRED3/HIF1A/COL4A1/EPHB2/FAT3/MFAP5/PRDM1/WNT5A/NHS/WNT5B/SHH/MYOM1/MEIS3/NRP1/WNT7A/LARGE1/HESX1/PDE6B/CTNNB1/DZANK1/CDON/CASP2/GDF11/LIMK2/TGFBR1/SMARCD3/TBC1D32/PAX6/IFT140/HCN1/ZNF513/MAF/NPHP1/JAG1/ACVR2B/C12orf57/TWSG1/SPRED1/HES1/SH3PXD2B/CDK20/STAT3/SRF…
BP	GO:0001654	eye development	240	0.526085	2.12536	1e-10	1.55089e-08	1.23953e-08	1696	tags=29%, list=13%, signal=26%	COL8A1/THY1/PXDN/BIRC7/PDGFRB/GLI3/PDGFRA/NDP/COL5A1/MFAP2/TBX2/FBN1/COL5A2/FOXC2/EFEMP1/TWIST1/SALL2/ZEB1/DIO3/VSTM4/WNT7B/FOXC1/SPRED3/HIF1A/COL4A1/EPHB2/FAT3/MFAP5/PRDM1/WNT5A/NHS/WNT5B/SHH/MYOM1/MEIS3/NRP1/WNT7A/LARGE1/HESX1/PDE6B/CTNNB1/DZANK1/CDON/CASP2/GDF11/LIMK2/TGFBR1/SMARCD3/TBC1D32/PAX6/IFT140/HCN1/ZNF513/MAF/NPHP1/JAG1/ACVR2B/C12orf57/TWSG1/SPRED1/HES1/SH3PXD2B/CDK20/STAT3/SRF/SHROOM…
BP	GO:0001704	formation of primary germ layer	85	0.608276	2.12372	2.25102e-07	1.42817e-05	1.14145e-05	1880	tags=36%, list=14%, signal=31%	MMP2/COL8A1/GJA1/COL7A1/COL5A1/SNAI1/COL12A1/COL5A2/FOXC2/ITGB3/FOXC1/MMP14/ITGA5/COL4A2/WNT11/WNT5A/HMGA2/FN1/ITGA3/ITGB1/COL6A1/CTNNB1/ITGAV/TWSG1/LAMA3/SRF/SMAD3/ACVR1/TBX19/POFUT2/EYA2
BP	GO:0007492	endoderm development	58	0.639948	2.11692	5.36599e-06	0.000199198	0.000159207	1696	tags=31%, list=13%, signal=27%	MMP2/COL8A1/COL7A1/COL5A1/COL12A1/COL5A2/MMP14/ITGA5/COL4A2/HMGA2/FN1/COL6A1/CTNNB1/ITGAV/ZFP36L1/LAMA3/EXT1/SMAD3
BP	GO:0150063	visual system development	241	0.523823	2.11408	1e-10	1.55089e-08	1.23953e-08	1696	tags=29%, list=13%, signal=25%	COL8A1/THY1/PXDN/BIRC7/PDGFRB/GLI3/PDGFRA/NDP/COL5A1/MFAP2/TBX2/FBN1/COL5A2/FOXC2/EFEMP1/TWIST1/SALL2/ZEB1/DIO3/VSTM4/WNT7B/FOXC1/SPRED3/HIF1A/COL4A1/EPHB2/FAT3/MFAP5/PRDM1/WNT5A/NHS/WNT5B/SHH/MYOM1/MEIS3/NRP1/WNT7A/LARGE1/HESX1/PDE6B/CTNNB1/DZANK1/CDON/CASP2/GDF11/LIMK2/TGFBR1/SMARCD3/TBC1D32/PAX6/IFT140/HCN1/ZNF513/MAF/NPHP1/JAG1/ACVR2B/C12orf57/TWSG1/SPRED1/HES1/SH3PXD2B/CDK20/STAT3/SRF/SHROOM…
MF	GO:0019955	cytokine binding	81	0.60938	2.10958	4.68639e-07	2.40488e-05	1.92207e-05	1849	tags=49%, list=14%, signal=43%	PDPN/PXDN/CRLF1/CCR1/ACKR2/BGN/LRRC32/ITGB3/IL20RA/OSMR/CHRDL2/ENG/TGFB3/IL1R1/IL2RG/NRP1/LIFR/GREM2/LTBP1/TRAF2/ITGB1/CD109/IL1RN/LTBP4/IL6ST/CD74/NRP2/TGFBR1/ADAM17/IL18R1/ITGAV/LTBP3/THBS1/A2M/TWSG1/CHRD/ACVR1/NBL1/IL12A/IL18BP
BP	GO:0035987	endodermal cell differentiation	37	0.691838	2.10703	2.68371e-05	0.000746199	0.000596392	1275	tags=38%, list=10%, signal=34%	MMP2/COL8A1/COL7A1/COL5A1/COL12A1/COL5A2/MMP14/ITGA5/COL4A2/HMGA2/FN1/COL6A1/CTNNB1/ITGAV
BP	GO:0048706	embryonic skeletal system development	66	0.622127	2.10489	2.46538e-06	0.000104914	8.38514e-05	1696	tags=42%, list=13%, signal=37%	COL1A1/GLI3/EDNRA/PDGFRA/PRRX1/RUNX2/FOXC2/MDFI/TWIST1/CHST11/ZEB1/HOXB2/MMP14/TGFB3/WNT11/WNT5A/SHH/SULF1/OSR1/SULF2/CTNNB1/SLC39A1/TGFBR1/IFT140/CDK20/EXT1/SLC2A10/SMAD3
MF	GO:0004714	transmembrane receptor protein tyrosine kinase activity	29	0.725391	2.09874	3.53124e-05	0.000919572	0.000734959	1169	tags=41%, list=9%, signal=38%	PDGFRB/PDGFRA/DDR2/EFEMP1/EPHA4/EPHB2/AXL/TYRO3/NRP1/EFNA3/IGF1R/NRP2
BP	GO:0001706	endoderm formation	41	0.681092	2.0971	2.61528e-05	0.000730081	0.00058351	1275	tags=34%, list=10%, signal=31%	MMP2/COL8A1/COL7A1/COL5A1/COL12A1/COL5A2/MMP14/ITGA5/COL4A2/HMGA2/FN1/COL6A1/CTNNB1/ITGAV
BP	GO:0010717	regulation of epithelial to mesenchymal transition	73	0.618186	2.09549	9.16485e-07	4.29272e-05	3.43091e-05	1867	tags=36%, list=14%, signal=31%	PDPN/COL1A1/IL1B/SNAI1/TWIST1/ENG/FOXC1/SPRED3/EPHA4/TGFB1/TGFB3/PHLDB1/EFNA1/CTNNB1/LRG1/TGFBR1/JAG1/LOXL2/TGFB1I1/SPRED1/FERMT2/LDLRAD4/SMAD3/ACVR1/WWTR1/POFUT2
BP	GO:1904705	regulation of vascular associated smooth muscle cell proliferation	42	0.674	2.08124	1.64066e-05	0.000500006	0.000399625	680	tags=24%, list=5%, signal=23%	MMP2/EFEMP2/PRKG1/GJA1/DDR2/MEF2C/ADAMTS1/IGFBP5/TGFB3/SOD2
BP	GO:0060021	roof of mouth development	67	0.613424	2.07691	4.59788e-06	0.000172519	0.000137884	1694	tags=39%, list=13%, signal=34%	GLI3/PDGFRA/PRRX1/SNAI1/TBX2/BNC2/LRRC32/TWIST1/EPHB2/TGFB3/ITGB6/WNT11/WNT5A/SHH/OSR1/WNT7A/SNAI2/FOXE1/GABRB3/GDF11/TGFBR1/TBC1D32/ACVR2B/CDK20/INTU/ITGB8
BP	GO:1990874	vascular associated smooth muscle cell proliferation	44	0.666769	2.0767	2.30792e-05	0.000659805	0.000527342	680	tags=23%, list=5%, signal=22%	MMP2/EFEMP2/PRKG1/GJA1/DDR2/MEF2C/ADAMTS1/IGFBP5/TGFB3/SOD2
BP	GO:0048514	blood vessel morphogenesis	426	0.486293	2.07229	1e-10	1.55089e-08	1.23953e-08	2021	tags=32%, list=15%, signal=28%	HSPB6/MMP2/COL8A1/PLXDC1/DCN/APOD/CHI3L1/THY1/SPARC/FAP/PXDN/PDGFRB/EFEMP2/ADGRA2/EDNRA/EMILIN1/IL1B/PDGFRA/IL1A/NDP/PRRX1/JCAD/TBX2/ARHGAP22/CREB3L1/THBS2/FOXC2/ITGB3/ADAMTS1/TWIST1/LOX/PLXND1/VSTM4/WNT7B/NPR3/ANGPTL4/HAS2/FKBP10/ENG/FOXC1/HIF1A/COL4A1/MMP14/ADAMTS9/EPHB2/ITGA5/ADGRG1/CSPG4/TGFB1/JUNB/COL4A2/SPHK1/NOTCH3/PRDM1/WNT11/WNT5A/SHH/COL4A3/COL15A1/RASIP1/HMGA2/ELK3/SULF1/FN1/ZC3H12A/NR…
CC	GO:0098636	protein complex involved in cell adhesion	34	0.693	2.06932	4.09446e-05	0.00104015	0.000831331	1275	tags=50%, list=10%, signal=45%	LAMA2/EMILIN1/ITGBL1/ITGAL/ITGB3/ITGA5/ITGB6/NID1/ITGA1/PLAU/ITGA10/ITGA3/ITGB1/TNC/LGALS1/EMILIN2/ITGAV
BP	GO:0021545	cranial nerve development	34	0.692082	2.06658	4.27917e-05	0.0010704	0.00085551	1826	tags=53%, list=14%, signal=46%	LPAR1/GLI3/NDP/KCNC2/HOXB2/POU4F1/EPHB2/NRP1/CTNNB1/KCNC1/NRP2/EGR2/NPR2/HES1/EXT1/SALL1/MAFB/PLXNA1
BP	GO:0035904	aorta development	46	0.655772	2.06574	1.99317e-05	0.000586304	0.000468597	1866	tags=43%, list=14%, signal=37%	PDGFRB/EFEMP2/EDNRA/LOXL1/TBX2/LOX/PLXND1/FKBP10/ENG/ADAMTS9/ADAMTS6/PRDM1/EGR2/JAG1/AP2B1/HES1/SRF/EFNB2/PKD2/ROBO1
BP	GO:0060840	artery development	75	0.603504	2.06526	3.03037e-06	0.000124562	9.95552e-05	1866	tags=43%, list=14%, signal=37%	PDGFRB/EFEMP2/GLI3/EDNRA/PRRX1/LOXL1/TBX2/FOXC2/LOX/PLXND1/FKBP10/ENG/FOXC1/ADAMTS9/ADAMTS6/NOTCH3/PRDM1/WNT11/SHH/NRP1/TGFBR1/EGR2/APOE/JAG1/AP2B1/ACVR2B/HES1/SRF/SLC2A10/EFNB2/PKD2/ROBO1
BP	GO:0043010	camera-type eye development	207	0.518921	2.06135	3.69937e-09	3.68827e-07	2.94782e-07	1696	tags=29%, list=13%, signal=25%	COL8A1/THY1/BIRC7/PDGFRB/GLI3/PDGFRA/NDP/TBX2/FBN1/FOXC2/EFEMP1/TWIST1/ZEB1/DIO3/VSTM4/WNT7B/FOXC1/SPRED3/HIF1A/COL4A1/EPHB2/FAT3/PRDM1/WNT5A/NHS/WNT5B/SHH/MYOM1/NRP1/WNT7A/LARGE1/HESX1/PDE6B/CTNNB1/CDON/CASP2/GDF11/LIMK2/TGFBR1/SMARCD3/TBC1D32/PAX6/IFT140/HCN1/ZNF513/MAF/NPHP1/JAG1/ACVR2B/C12orf57/TWSG1/SPRED1/HES1/CDK20/STAT3/SRF/SHROOM2/RARG/SMAD3
BP	GO:0010712	regulation of collagen metabolic process	28	0.720283	2.05742	8.19073e-05	0.00183215	0.00146433	838	tags=39%, list=6%, signal=37%	FAP/EMILIN1/DDR2/CREB3L1/CIITA/ENG/TGFB1/TGFB3/LARP6/ITGB1/RUNX1
BP	GO:0051216	cartilage development	140	0.547702	2.0556	1.46333e-07	9.81979e-06	7.84837e-06	1753	tags=37%, list=13%, signal=33%	MGP/CHI3L1/COL1A1/GLI3/PRRX1/SNAI1/CTSK/BGN/MEF2C/RUNX2/MBOAT2/CHSY1/EFEMP1/CHST11/ZEB1/WNT7B/CHRDL2/HIF1A/TGFB1/WNT11/BBS1/WNT5A/WNT5B/HMGA2/SULF1/OSR1/WNT7A/FOSL2/BMP8A/ADAMTS7/SNAI2/RUNX1/SLC26A2/TIMP1/SULF2/CTNNB1/TGFBI/TGFBR1/NPR2/MAF/SOX5/LTBP3/LOXL2/TWSG1/SRF/EXT1/SERPINH1/MEX3C/RARG/ITGB8/SMAD3/TRPS1
BP	GO:0070527	platelet aggregation	50	0.634614	2.04569	3.24562e-05	0.000871199	0.000696297	1891	tags=36%, list=14%, signal=31%	PDPN/PRKG1/EMILIN1/PDGFRA/MYL9/ITGB3/FERMT3/TYRO3/FGG/IL6ST/EMILIN2/FGA/FGB/SH2B3/VCL/SERPINE2/STXBP1/FLNA
BP	GO:0048598	embryonic morphogenesis	403	0.479538	2.04182	1e-10	1.55089e-08	1.23953e-08	1736	tags=27%, list=13%, signal=24%	MMP2/COL8A1/VANGL2/CTHRC1/IRX3/PTK7/DACT1/SOCS3/GLI3/GJA1/EDNRA/PDGFRA/COL7A1/COL5A1/PRRX1/SNAI1/MFAP2/MEF2C/COL12A1/TBX2/FBN1/RUNX2/COL5A2/FOXC2/ITGB3/EFEMP1/MDFI/TWIST1/IGF2/CHST11/ZEB1/GLI1/WNT7B/HOXB2/ENG/FOXC1/GDF7/HIF1A/MMP14/EPHB2/ITGA5/CELSR1/TGFB1/MFAP5/TGFB3/COL4A2/PHLDB1/BCL2L11/WNT11/WNT5A/WNT5B/SHH/HMGA2/LRP4/SULF1/FN1/GLI2/EFNA1/OSR1/WNT7A/GREM2/ITGA3/RPL38/ITGB1/COL6A1/FOXE1/WHRN/H…
BP	GO:0097205	renal filtration	18	0.790514	2.04141	7.41701e-05	0.00170148	0.00135989	1053	tags=50%, list=8%, signal=46%	EDNRA/CORO2B/SULF1/ITGA3/KIRREL1/GAS6/SULF2/PDGFB/MCAM
BP	GO:0032835	glomerulus development	47	0.643504	2.04093	3.03712e-05	0.00082475	0.000659173	1556	tags=47%, list=12%, signal=41%	PDGFRB/EDNRA/PDGFRA/MEF2C/FOXC2/ITGB3/BASP1/FOXC1/NOTCH3/NID1/COL4A4/COL4A3/PECAM1/SULF1/OSR1/SULF2/PDGFB/EGR1/JAG1/ANGPT2/HES1/EXT1
BP	GO:0060071	Wnt signaling pathway, planar cell polarity pathway	40	0.660507	2.02741	8.34331e-05	0.0018601	0.00148667	1405	tags=35%, list=11%, signal=31%	VANGL2/CTHRC1/PTK7/DACT1/PLEKHA4/CELSR1/WNT11/WNT5A/WNT7A/PRICKLE2/CDC42/CELSR2/DVL1/SMURF1
BP	GO:0001525	angiogenesis	366	0.481913	2.02322	1e-10	1.55089e-08	1.23953e-08	2021	tags=32%, list=15%, signal=28%	HSPB6/MMP2/COL8A1/PLXDC1/DCN/APOD/CHI3L1/THY1/SPARC/FAP/PXDN/PDGFRB/ADGRA2/EDNRA/EMILIN1/IL1B/PDGFRA/IL1A/NDP/JCAD/ARHGAP22/CREB3L1/THBS2/FOXC2/ITGB3/ADAMTS1/TWIST1/PLXND1/VSTM4/NPR3/ANGPTL4/ENG/FOXC1/HIF1A/COL4A1/MMP14/ADAMTS9/EPHB2/ITGA5/ADGRG1/CSPG4/TGFB1/COL4A2/SPHK1/NOTCH3/WNT5A/SHH/COL4A3/COL15A1/RASIP1/HMGA2/ELK3/SULF1/FN1/ZC3H12A/NRP1/EFNA1/WNT7A/CCL2/FGF1/ITGB1/SH2D2A/TYMP/ETS1/VEGFB/RUN…
BP	GO:0031102	neuron projection regeneration	43	0.650459	2.01462	9.58761e-05	0.00208448	0.001666	1311	tags=35%, list=10%, signal=32%	MMP2/APOD/THY1/PRRX1/EPHA4/APOA4/TNC/PTPRS/SPP1/KREMEN1/IGF1R/RTN4RL1/MAPK8IP3/NREP/ULK1
BP	GO:0048592	eye morphogenesis	101	0.561608	2.01378	3.34741e-06	0.000131245	0.000104896	1668	tags=31%, list=13%, signal=27%	COL8A1/THY1/GLI3/NDP/COL5A1/MFAP2/TBX2/FBN1/COL5A2/EFEMP1/TWIST1/ZEB1/DIO3/HIF1A/EPHB2/FAT3/MFAP5/PRDM1/WNT5A/LARGE1/CTNNB1/DZANK1/CDON/GDF11/PAX6/HCN1/JAG1/C12orf57/STAT3/SHROOM2/RARG
BP	GO:0071711	basement membrane organization	31	0.692059	2.01294	0.000125602	0.00263237	0.0021039	841	tags=32%, list=6%, signal=30%	LAMA2/PXDN/HMCN1/NID2/COL4A1/PHLDB1/NID1/FLRT2/ITGB1/LARGE1
BP	GO:1903055	positive regulation of extracellular matrix organization	24	0.72446	2.00906	0.000237154	0.00424384	0.00339185	1696	tags=42%, list=13%, signal=36%	PDPN/EFEMP2/EMILIN1/DDR2/TGFB1/PHLDB1/RUNX1/TGFBR1/FSCN1/SMAD3
BP	GO:0001501	skeletal system development	342	0.482034	2.00721	1e-10	1.55089e-08	1.23953e-08	1706	tags=29%, list=13%, signal=26%	MGP/MMP2/COL1A2/CHI3L1/COL1A1/HHIP/GLI3/GJA1/EDNRA/PDGFRA/DDR2/CDH11/PRRX1/SNAI1/CTSK/LRRC17/BGN/MEF2C/RANBP3L/FBN1/BNC2/RUNX2/COL5A2/FOXC2/MBOAT2/CHSY1/SIGLEC15/EFEMP1/MDFI/TWIST1/CHST11/LOX/SNX10/ZEB1/FMN1/TGM2/WNT7B/NPR3/HOXB2/HAS2/CHRDL2/ENG/FOXC1/HIF1A/MMP14/HAPLN3/TGFB1/TGFB3/ITGB6/WNT11/BBS1/WNT5A/WNT5B/SHH/HMGA2/SULF1/GLI2/OSR1/WNT7A/FOSL2/BMP8A/ADAMTS7/RPL38/SNAI2/LRRK1/RUNX1/LARGE1/TRIM…
BP	GO:0048562	embryonic organ morphogenesis	165	0.518114	2.00428	9.33066e-08	6.38419e-06	5.1025e-06	1736	tags=32%, list=13%, signal=28%	VANGL2/CTHRC1/PTK7/GLI3/EDNRA/PDGFRA/PRRX1/MFAP2/MEF2C/TBX2/FBN1/RUNX2/FOXC2/EFEMP1/MDFI/TWIST1/CHST11/ZEB1/GLI1/HOXB2/ENG/HIF1A/MMP14/EPHB2/MFAP5/TGFB3/WNT11/WNT5A/SHH/EFNA1/OSR1/RPL38/FOXE1/WHRN/HESX1/CTNNB1/SLC39A1/TGFBR1/PAX6/IFT140/LHFPL5/DVL1/HES1/LRIG1/SRF/SOBP/MAFB/RARG/SMAD3/ACVR1/PDZD7/HLX
BP	GO:0071230	cellular response to amino acid stimulus	61	0.600567	2.00422	4.09861e-05	0.00104015	0.000831331	805	tags=21%, list=6%, signal=20%	MMP2/COL1A2/COL1A1/SOCS1/PDGFRA/COL5A2/BCL11A/ZEB1/COL4A1/COL16A1/CEBPB/BMT2/COL6A1
CC	GO:0031594	neuromuscular junction	55	0.609296	1.99661	6.10424e-05	0.00145706	0.00116454	1188	tags=29%, list=9%, signal=27%	POSTN/LAMA2/SYP/SV2A/DLG4/EPHA4/SYNC/LRP4/CIB2/ITGA3/ITGB1/LARGE1/CHRNE/COL4A5/FCHSD1/SPOCK1
CC	GO:0031258	lamellipodium membrane	19	0.765353	1.99528	0.000220472	0.00407057	0.00325336	483	tags=32%, list=4%, signal=30%	PDPN/ANTXR1/FAP/ITGB3/PLXND1/CSPG4
BP	GO:0048701	embryonic cranial skeleton morphogenesis	30	0.685844	1.99408	0.00050845	0.00761476	0.00608602	1252	tags=40%, list=9%, signal=36%	GLI3/PDGFRA/PRRX1/RUNX2/FOXC2/TWIST1/CHST11/MMP14/TGFB3/SLC39A1/TGFBR1/IFT140
BP	GO:0007498	mesoderm development	79	0.580153	1.99381	3.3267e-06	0.00013117	0.000104836	1921	tags=35%, list=15%, signal=30%	IRX3/GJA1/SNAI1/FOXC2/ITGB3/POU4F1/FOXC1/WNT11/WNT5A/SHH/HMGA2/OSR1/ITGA3/RPL38/ITGB1/TP63/GDF11/ZFP36L1/ACVR2B/TWSG1/SRF/EXT1/SMAD3/ACVR1/TBX19/POFUT2/EYA2/TEAD2
BP	GO:0061448	connective tissue development	201	0.499068	1.98741	6.289e-08	4.43343e-06	3.54337e-06	1769	tags=34%, list=13%, signal=30%	MGP/CHI3L1/PDGFRB/COL1A1/GLI3/COL5A1/PRRX1/SNAI1/CTSK/BGN/MEF2C/RUNX2/FOXC2/ITGB3/MBOAT2/CHSY1/EFEMP1/CHST11/LOX/ZEB1/WNT7B/CHRDL2/GDF7/HIF1A/TGFB1/CSF1/WNT11/BBS1/WNT5A/WNT5B/KLF7/HMGA2/SULF1/OSR1/WNT7A/FOSL2/BMP8A/ADAMTS7/SNAI2/RUNX1/LARGE1/SLC26A2/TIMP1/SULF2/PDGFB/CTNNB1/TGFBI/EGR1/TGFBR1/NPR2/MAF/SOX5/LTBP3/LOXL2/TWSG1/SLC39A13/SH3PXD2B/SRF/EXT1/PPARG/SERPINH1/MEX3C/RARG/ITGB8/SMAD3/CRIP1/TR…
BP	GO:0070570	regulation of neuron projection regeneration	23	0.724134	1.98631	0.000263733	0.00459456	0.00367215	1126	tags=35%, list=9%, signal=32%	THY1/PRRX1/EPHA4/PTPRS/SPP1/KREMEN1/IGF1R/RTN4RL1
BP	GO:0032965	regulation of collagen biosynthetic process	24	0.715908	1.98535	0.000341157	0.00558905	0.00446699	838	tags=38%, list=6%, signal=35%	EMILIN1/DDR2/CREB3L1/CIITA/ENG/TGFB1/TGFB3/LARP6/RUNX1
BP	GO:0038065	collagen-activated signaling pathway	11	0.861484	1.98382	0.00033308	0.00549423	0.0043912	928	tags=55%, list=7%, signal=51%	COL1A1/DDR2/COL4A1/COL4A2/COL4A3/COL4A5
BP	GO:0085029	extracellular matrix assembly	32	0.674816	1.98267	0.000267729	0.00462495	0.00369644	885	tags=38%, list=7%, signal=35%	COL1A2/ANTXR1/PXDN/EFEMP2/EMILIN1/FBLN5/LOX/HAS2/FKBP10/TGFB1/PHLDB1/GAS6
MF	GO:0019199	transmembrane receptor protein kinase activity	45	0.631858	1.98168	4.65884e-05	0.00115708	0.000924788	1420	tags=38%, list=11%, signal=34%	PDGFRB/PDGFRA/DDR2/EFEMP1/ENG/EPHA4/EPHB2/AXL/TYRO3/NRP1/LTBP1/EFNA3/LTBP4/IGF1R/NRP2/TGFBR1/ACVR2B
BP	GO:0001945	lymph vessel development	20	0.745075	1.98128	0.00020372	0.00381169	0.00304646	1689	tags=35%, list=13%, signal=31%	PDPN/TMEM204/FOXC2/FOXC1/NPR2/ACVR2B/EFNB2
BP	GO:0007179	transforming growth factor beta receptor signaling pathway	158	0.516789	1.98054	1.52535e-07	1.01385e-05	8.10307e-06	1786	tags=30%, list=14%, signal=27%	COL1A2/EMILIN1/NDP/LTBP2/FBN1/LRRC32/PMEPA1/CHST11/LOX/ZEB1/HTRA1/ENG/ZEB2/SPRED3/TGFB1/TGFB3/ITGB6/LTBP1/ITGA3/CDKN2B/DKK3/CD109/SNX25/LTBP4/LRG1/TGFBR1/ADAM17/FOS/FURIN/NREP/LTBP3/THBS1/SMURF1/TGFB1I1/TWSG1/SPRED1/FERMT2/RNF111/STAT3/PPARG/LDLRAD4/SLC2A10/ITGB8/SMAD3/ACVR1/PXN/RBBP4/FERMT1
MF	GO:0005178	integrin binding	107	0.547918	1.9763	3.86487e-06	0.000147393	0.000117803	1694	tags=37%, list=13%, signal=33%	THY1/FAP/ICAM4/EMILIN1/IL1B/ITGBL1/ICAM5/COL5A1/ITGAL/FBLN5/FBN1/CXCL12/ITGB3/ICAM1/IGF2/FERMT3/MMP14/ITGA5/COL16A1/ITGB6/ITGA1/COL4A3/ITGA10/FN1/CIB2/ITGA3/FGF1/ITGB1/SPP1/LTBP4/PLPP3/TGFBI/ADAM17/ITGAV/FBLN1/THBS1/FERMT2/EDIL3/ADAM22/ITGB8
BP	GO:0090596	sensory organ morphogenesis	157	0.515273	1.96983	2.22853e-07	1.42687e-05	1.14041e-05	1728	tags=29%, list=13%, signal=26%	COL8A1/CTHRC1/PTK7/THY1/GLI3/EDNRA/NDP/COL5A1/PRRX1/MFAP2/TBX2/FBN1/COL5A2/EFEMP1/TWIST1/ZEB1/DIO3/HIF1A/EPHB2/FAT3/MFAP5/PRDM1/WNT5A/OSR1/RPL38/WHRN/LARGE1/HESX1/CTNNB1/DZANK1/CDON/GDF11/PAX6/HCN1/LHFPL5/JAG1/DVL1/C12orf57/LRIG1/STAT3/SOBP/SHROOM2/INTU/MAFB/RARG/PDZD7
BP	GO:0002009	morphogenesis of an epithelium	362	0.468217	1.96906	1e-10	1.55089e-08	1.23953e-08	2315	tags=33%, list=18%, signal=28%	PDPN/MMP2/VANGL2/CTHRC1/IRX3/PTK7/DACT1/SOCS3/HHIP/GLI3/GJA1/EDNRA/COL5A1/KRT6A/SNAI1/MEF2C/KRT17/TBX2/HS3ST3A1/FOXC2/TWIST1/IGFBP5/WNK4/PLXND1/FMN1/TGM2/WNT7B/PLEKHA4/HOXB2/ENG/KRT16/CA9/GDF7/EPHA4/HIF1A/COL4A1/MMP14/ITGA5/CELSR1/TGFB1/CSF1/ADAMTS16/WNT11/WNT5A/WNT5B/SHH/RASIP1/SULF1/NRP1/GLI2/OSR1/WNT7A/FGF1/SNAI2/ITGB1/FOXE1/HESX1/TNC/TP63/PRICKLE2/CTNNB1/LRG1/SDC4/ADAM17/CDC42/KLHL3/NPHP1/CEL…
BP	GO:0035567	non-canonical Wnt signaling pathway	55	0.599469	1.96441	0.000103712	0.00223396	0.00178547	1405	tags=31%, list=11%, signal=28%	VANGL2/CTHRC1/PTK7/DAAM2/DACT1/PLEKHA4/CELSR1/WNT11/WNT5A/WNT5B/WNT7A/PRICKLE2/TMEM67/CDC42/CELSR2/DVL1/SMURF1
BP	GO:0072210	metanephric nephron development	22	0.727303	1.95839	0.000695409	0.00970652	0.00775784	1818	tags=50%, list=14%, signal=43%	PDGFRB/PDGFRA/FMN1/OSR1/PDGFB/CTNNB1/EGR1/WNT4/HES1/SALL1/PKD2
BP	GO:0007423	sensory organ development	337	0.471005	1.95832	1.65087e-10	2.45137e-08	1.95923e-08	1781	tags=28%, list=13%, signal=25%	COL8A1/CTHRC1/PTK7/THY1/PXDN/BIRC7/PDGFRB/GLI3/EDNRA/PDGFRA/NDP/COL5A1/PRRX1/MFAP2/TBX2/FBN1/BNC2/COL5A2/FOXC2/EFEMP1/TWIST1/SALL2/ZEB1/DIO3/VSTM4/WNT7B/FOXC1/SPRED3/EPHA4/HIF1A/COL4A1/EPHB2/FAT3/MFAP5/TGFB3/BCL2L11/PRDM1/WNT5A/NHS/WNT5B/SHH/MYOM1/MEIS3/NRP1/OSR1/WNT7A/RPL38/WHRN/LARGE1/HESX1/PDE6B/GSDME/CEBPD/CTNNB1/DZANK1/CDON/CASP2/GDF11/SDC4/LIMK2/TGFBR1/SMARCD3/TBC1D32/PAX6/IFT140/HCN1/ZNF51…
BP	GO:0061005	cell differentiation involved in kidney development	38	0.636422	1.95662	0.000219433	0.00406213	0.00324662	1744	tags=42%, list=13%, signal=37%	GLI3/EDNRA/MEF2C/FOXC2/BASP1/SHH/OSR1/PDGFB/CTNNB1/JAG1/PTCH1/WNT4/HES1/EXT1/SALL1/WWTR1
BP	GO:1904707	positive regulation of vascular associated smooth muscle cell proliferation	26	0.693458	1.95405	0.000748828	0.0103487	0.00827106	295	tags=19%, list=2%, signal=19%	MMP2/GJA1/DDR2/ADAMTS1/IGFBP5
BP	GO:0003180	aortic valve morphogenesis	24	0.704443	1.95355	0.000578699	0.00838125	0.00669863	794	tags=33%, list=6%, signal=31%	EMILIN1/CDH11/SNAI1/TWIST1/NFATC1/TGFB1/EFNA1/SNAI2
BP	GO:0072012	glomerulus vasculature development	20	0.734185	1.95232	0.000334582	0.00549423	0.0043912	1456	tags=60%, list=11%, signal=53%	PDGFRB/EDNRA/PDGFRA/FOXC2/ITGB3/NOTCH3/PECAM1/OSR1/PDGFB/EGR1/ANGPT2/HES1
BP	GO:0048704	embryonic skeletal system morphogenesis	44	0.626754	1.95207	0.000229022	0.0041668	0.00333028	1252	tags=39%, list=9%, signal=35%	GLI3/PDGFRA/PRRX1/RUNX2/FOXC2/MDFI/TWIST1/CHST11/ZEB1/HOXB2/MMP14/TGFB3/OSR1/CTNNB1/SLC39A1/TGFBR1/IFT140
BP	GO:0009953	dorsal/ventral pattern formation	55	0.595615	1.95178	0.000134599	0.00273867	0.00218886	1878	tags=40%, list=14%, signal=34%	HHIP/GLI3/CXXC4/MDFI/GLI1/HOXB2/SHH/LRP4/GLI2/WNT7A/GREM2/CTNNB1/TBC1D32/PAX6/PTCH1/DYNC2H1/CHRD/CDK20/INTU/ACVR1/NBL1/BMP1
BP	GO:0036296	response to increased oxygen levels	23	0.711249	1.95097	0.000520344	0.0077519	0.00619563	680	tags=17%, list=5%, signal=17%	PDPN/MMP2/COL1A1/SOD2
BP	GO:0048010	vascular endothelial growth factor receptor signaling pathway	43	0.629344	1.94922	0.000259025	0.0045627	0.00364669	1120	tags=33%, list=8%, signal=30%	EMILIN1/IL1B/TMEM204/FOXC2/ITGB3/FOXC1/HIF1A/ITGA5/AXL/SULF1/NRP1/VEGFB/EPN2/VAV1
BP	GO:0071229	cellular response to acid chemical	67	0.575574	1.94876	4.62898e-05	0.00115377	0.000922141	805	tags=19%, list=6%, signal=18%	MMP2/COL1A2/COL1A1/SOCS1/PDGFRA/COL5A2/BCL11A/ZEB1/COL4A1/COL16A1/CEBPB/BMT2/COL6A1
BP	GO:1904646	cellular response to amyloid-beta	26	0.690751	1.94643	0.000787982	0.0106991	0.00855113	1027	tags=35%, list=8%, signal=32%	GJA1/CACNB1/GRM5/ICAM1/EPHA4/EPHB2/CACNA1A/TLR4/IGF1R
CC	GO:0008305	integrin complex	21	0.724031	1.94592	0.000963085	0.0126579	0.0101167	798	tags=48%, list=6%, signal=45%	EMILIN1/ITGBL1/ITGAL/ITGB3/ITGA5/ITGB6/ITGA1/ITGA10/ITGA3/ITGB1
BP	GO:0061298	retina vasculature development in camera-type eye	15	0.793603	1.94478	0.00032664	0.00545606	0.0043607	841	tags=53%, list=6%, signal=50%	PDGFRB/PDGFRA/NDP/VSTM4/HIF1A/COL4A1/NRP1/LARGE1
BP	GO:0061437	renal system vasculature development	22	0.721868	1.94375	0.000782942	0.0106722	0.00852962	1456	tags=59%, list=11%, signal=53%	PDGFRB/EDNRA/PDGFRA/FOXC2/ITGB3/NOTCH3/PECAM1/NRP1/OSR1/PDGFB/EGR1/ANGPT2/HES1
BP	GO:0061440	kidney vasculature development	22	0.721868	1.94375	0.000782942	0.0106722	0.00852962	1456	tags=59%, list=11%, signal=53%	PDGFRB/EDNRA/PDGFRA/FOXC2/ITGB3/NOTCH3/PECAM1/NRP1/OSR1/PDGFB/EGR1/ANGPT2/HES1
CC	GO:0042734	presynaptic membrane	72	0.570434	1.9421	4.75734e-05	0.0011732	0.000937665	1270	tags=28%, list=10%, signal=25%	SYT1/LPAR1/KCTD12/SYP/KCTD16/KCNC2/RIMS3/STX1A/DRD1/EPHA4/EPHB2/SNAP25/PRRT2/STX11/ITGA3/DNM1/PTPRS/CTNNB1/KCNC1/HCN1
MF	GO:0005161	platelet-derived growth factor receptor binding	12	0.836514	1.94209	0.000266037	0.00460712	0.00368219	1022	tags=50%, list=8%, signal=46%	PDGFRB/PDGFRA/ITGB3/ITGA5/IL1R1/PDGFB
BP	GO:0099068	postsynapse assembly	21	0.721551	1.93925	0.00101119	0.0131208	0.0104866	1106	tags=38%, list=8%, signal=35%	LRRTM2/EPHB2/LRFN4/WNT5A/LRP4/WNT7A/PTPRS/CDH2
BP	GO:0072006	nephron development	103	0.539926	1.9375	8.97578e-06	0.000298295	0.000238409	2315	tags=46%, list=18%, signal=38%	IRX3/PDGFRB/GLI3/EDNRA/PDGFRA/MEF2C/HS3ST3A1/FOXC2/ITGB3/WNK4/BASP1/FMN1/WNT7B/FOXC1/NOTCH3/ADAMTS16/NID1/WNT11/COL4A4/SHH/COL4A3/PECAM1/SULF1/OSR1/ITGA3/FGF1/SULF2/PDGFB/CTNNB1/EGR1/KLHL3/JAG1/PTCH1/WNT4/ANGPT2/HES1/EXT1/SALL1/WWTR1/PKD2/GREB1L/HS3ST3B1/IQGAP1/ANGPT1/CTNS/PODXL/BMP2
BP	GO:0017015	regulation of transforming growth factor beta receptor signaling pathway	112	0.532011	1.937	4.31334e-06	0.000163602	0.000130757	1786	tags=29%, list=14%, signal=26%	EMILIN1/FBN1/PMEPA1/CHST11/LOX/ZEB1/HTRA1/ENG/ZEB2/SPRED3/TGFB1/TGFB3/LTBP1/ITGA3/CDKN2B/DKK3/CD109/SNX25/LTBP4/LRG1/ADAM17/NREP/THBS1/SMURF1/TGFB1I1/SPRED1/RNF111/PPARG/LDLRAD4/SLC2A10/SMAD3/RBBP4/FERMT1
BP	GO:0003094	glomerular filtration	16	0.783046	1.93553	0.00050629	0.00759871	0.00607319	1053	tags=50%, list=8%, signal=46%	EDNRA/CORO2B/SULF1/KIRREL1/GAS6/SULF2/PDGFB/MCAM
BP	GO:0070167	regulation of biomineral tissue development	64	0.575402	1.93472	7.00784e-05	0.00163026	0.00130297	885	tags=20%, list=7%, signal=19%	MGP/AMTN/SRGN/ODAPH/DDR2/CCR1/MEF2C/TWIST1/HIF1A/TGFB1/OSR1/CEBPB/GAS6
BP	GO:0070571	negative regulation of neuron projection regeneration	11	0.838045	1.92984	0.000909525	0.0120219	0.0096084	1126	tags=55%, list=9%, signal=50%	THY1/EPHA4/PTPRS/SPP1/KREMEN1/RTN4RL1
BP	GO:0001503	ossification	288	0.467618	1.92984	8.15756e-09	7.491e-07	5.9871e-07	1560	tags=26%, list=12%, signal=23%	MGP/MMP2/COL1A2/CTHRC1/SRGN/COL1A1/GLI3/DDR2/CDH11/IFITM1/CCR1/SNAI1/CTSK/MEF2C/CREB3L1/RANBP3L/RUNX2/COL5A2/IGSF10/FOXC2/CHSY1/TWIST1/IGF2/IGFBP5/LOX/SNX10/GLI1/MRC2/WNT7B/CHRDL2/FOXC1/HIF1A/MMP14/JUNB/CSF1/WNT11/WNT5A/SHH/LRP4/GLI2/OSR1/FOSL2/CLEC11A/BMP8A/ADAMTS7/RPL38/CEBPB/SNAI2/COL6A1/RUNX1/TNC/SLC26A2/SPP1/KREMEN1/CEBPD/TP63/IL6ST/CTNNB1/NOCT/ALPL/EGR2/NPR2/FSTL3/JAG1/PTCH1/LTBP3/WNT4/ACVR…
BP	GO:0045061	thymic T cell selection	11	0.835475	1.92392	0.00101146	0.0131208	0.0104866	1554	tags=64%, list=12%, signal=56%	GLI3/ITPKB/CARD11/SHH/DOCK2/CD74/SRF
BP	GO:1903844	regulation of cellular response to transforming growth factor beta stimulus	113	0.529296	1.9232	7.16275e-06	0.000249944	0.000199765	1786	tags=29%, list=14%, signal=25%	EMILIN1/FBN1/PMEPA1/CHST11/LOX/ZEB1/HTRA1/ENG/ZEB2/SPRED3/TGFB1/TGFB3/LTBP1/ITGA3/CDKN2B/DKK3/CD109/SNX25/LTBP4/LRG1/ADAM17/NREP/THBS1/SMURF1/TGFB1I1/SPRED1/RNF111/PPARG/LDLRAD4/SLC2A10/SMAD3/RBBP4/FERMT1
MF	GO:0004888	transmembrane signaling receptor activity	306	0.463134	1.92147	1.37421e-09	1.57223e-07	1.25659e-07	1370	tags=28%, list=10%, signal=26%	LPAR1/PTK7/ANTXR1/CRLF1/PDGFRB/ADGRA2/EDNRA/PDGFRA/DDR2/CCR1/ACKR2/ITGAL/MC1R/GRM5/LAG3/ICAM1/EFEMP1/ADGRF4/SCTR/HRH1/PLXND1/TLR5/PTGFR/DNER/NPR3/FCMR/IL20RA/MRGPRF/OSMR/ENG/DRD1/PTPRE/EPHA4/EPHB2/ADGRG1/CELSR1/PLXNC1/ADGRD1/SLC22A17/IL1R1/ADRA1B/SPHK1/NID1/GPR176/AXL/TYRO3/IL2RG/PECAM1/NRP1/LIFR/P2RY2/GPR87/ADRA1D/LTBP1/TLR4/IL10RB/SORCS3/OR1F1/CHRNE/EFNA3/LPAR5/GPR157/GIPR/LTBP4/LRP8/PTPRG/IL4R…
BP	GO:1901342	regulation of vasculature development	183	0.489815	1.92034	5.61241e-07	2.77794e-05	2.22024e-05	2021	tags=35%, list=15%, signal=30%	HSPB6/DCN/CHI3L1/SPARC/ADGRA2/EMILIN1/IL1B/IL1A/JCAD/CREB3L1/THBS2/FOXC2/ITGB3/ADAMTS1/TWIST1/PLXND1/ANGPTL4/ENG/FOXC1/HIF1A/ADAMTS9/ITGA5/COL4A2/SPHK1/WNT5A/COL4A3/HMGA2/SULF1/ZC3H12A/NRP1/EFNA1/FGF1/ITGB1/ETS1/VEGFB/RUNX1/EFNA3/SERPINE1/EPN2/EMILIN2/CTNNB1/LRG1/ADAM12/F3/VASH2/WNT4/THBS1/SPRED1/ANGPT2/CXCL8/STAT3/PPARG/ERAP1/TNFAIP3/ITGB8/CD40/BTG1/MECP2/ATP2B4/PLK2/FUT1/GTF2I/C3/PIK3CD
BP	GO:0097709	connective tissue replacement	10	0.860164	1.91666	0.000327928	0.00545606	0.0043607	1560	tags=60%, list=12%, signal=53%	IL1A/HIF1A/TGFB1/RUNX1/TIMP1/PPARG
BP	GO:1904888	cranial skeletal system development	47	0.60425	1.91643	0.000229888	0.00416724	0.00333062	1252	tags=34%, list=9%, signal=31%	GLI3/EDNRA/PDGFRA/PRRX1/RUNX2/FOXC2/TWIST1/CHST11/MMP14/TGFB3/FOXE1/TP63/CTNNB1/SLC39A1/TGFBR1/IFT140
BP	GO:0090175	regulation of establishment of planar polarity	44	0.615287	1.91635	0.000420922	0.00657185	0.00525249	1405	tags=32%, list=11%, signal=29%	VANGL2/CTHRC1/PTK7/DACT1/PLEKHA4/CELSR1/WNT11/WNT5A/WNT7A/PRICKLE2/CDC42/CELSR2/DVL1/SMURF1
BP	GO:0048844	artery morphogenesis	50	0.594126	1.91518	0.000254019	0.00451094	0.00360532	1818	tags=42%, list=14%, signal=36%	PDGFRB/EFEMP2/EDNRA/PRRX1/TBX2/FOXC2/FKBP10/ENG/FOXC1/ADAMTS9/NOTCH3/PRDM1/WNT11/NRP1/TGFBR1/APOE/JAG1/HES1/SRF/EFNB2/PKD2
BP	GO:0032967	positive regulation of collagen biosynthetic process	20	0.72016	1.91503	0.000578418	0.00838125	0.00669863	1374	tags=40%, list=10%, signal=36%	DDR2/CREB3L1/ENG/TGFB1/TGFB3/LARP6/RUNX1/WNT4
BP	GO:0090103	cochlea morphogenesis	11	0.831251	1.9142	0.0012156	0.0150955	0.012065	613	tags=45%, list=5%, signal=43%	CTHRC1/PTK7/TBX2/ZEB1/WNT5A
BP	GO:0048729	tissue morphogenesis	429	0.449071	1.91239	1e-10	1.55089e-08	1.23953e-08	2153	tags=30%, list=16%, signal=26%	PDPN/MMP2/VANGL2/CTHRC1/IRX3/PTK7/DACT1/EFEMP2/SOCS3/HHIP/GLI3/GJA1/EDNRA/COL5A1/KRT6A/SNAI1/MEF2C/KRT17/TBX2/MYL11/HS3ST3A1/FOXC2/ITGB3/TWIST1/IGFBP5/WNK4/PLXND1/FMN1/TGM2/WNT7B/PLEKHA4/HOXB2/ENG/POU4F1/FOXC1/KRT16/CA9/GDF7/EPHA4/HIF1A/COL4A1/MMP14/ITGA5/CELSR1/TGFB1/CSF1/ADAMTS16/WNT11/WNT5A/WNT5B/SHH/RASIP1/HMGA2/SULF1/NRP1/GLI2/OSR1/WNT7A/ITGA3/FGF1/SNAI2/ITGB1/FOXE1/HESX1/TNC/TP63/FOXL1/PRIC…
CC	GO:0060170	ciliary membrane	47	0.602853	1.912	0.000251375	0.00447537	0.00357689	2281	tags=40%, list=17%, signal=34%	MXRA8/HHIP/EVC2/DRD1/TCTN2/BBS1/PDE6B/GUCY2D/GPR157/SCNN1A/MCHR1/TMEM67/PTCH1/PKD2/BBS9/EVC/GPR161/IQCE/BBS5
BP	GO:0043949	regulation of cAMP-mediated signaling	14	0.786478	1.91166	0.000545296	0.00801183	0.00640337	972	tags=43%, list=7%, signal=40%	LPAR1/PDE3A/SCTR/PDE11A/PDE4D/GIPR
MF	GO:0019838	growth factor binding	97	0.537466	1.91133	2.3734e-05	0.000667903	0.000533815	1437	tags=40%, list=11%, signal=36%	COL1A2/PXDN/PDGFRB/COL1A1/PDGFRA/LTBP2/COL5A1/IGFBP7/LRRC32/ITGB3/IGFBP5/HTRA1/OSMR/ENG/COL4A1/TGFB3/IL1R1/IL2RG/NRP1/LIFR/LTBP1/COL6A1/CD109/IGFBP1/IL1RN/IGFBP4/LTBP4/PDGFB/IGF1R/IL6ST/NRP2/TGFBR1/ITGAV/FURIN/LTBP3/THBS1/ACVR2B/A2M/TWSG1
CC	GO:0031527	filopodium membrane	14	0.786298	1.91122	0.000554779	0.0081	0.00647384	1275	tags=36%, list=10%, signal=32%	PDPN/ANTXR1/ITGB3/ITGA3/ITGAV
BP	GO:0033627	cell adhesion mediated by integrin	66	0.564775	1.91085	8.92447e-05	0.00195885	0.00156559	1275	tags=38%, list=10%, signal=34%	EMILIN1/ITGBL1/ITGAL/FBN1/FOXC2/ITGB3/ICAM1/ACER2/FERMT3/ITGA5/COL16A1/ITGB6/ITGA1/PLAU/ITGA10/EFNA1/ITGA3/SNAI2/ITGB1/SERPINE1/PLPP3/EMILIN2/MUC1/ADAM17/ITGAV
BP	GO:0042249	establishment of planar polarity of embryonic epithelium	11	0.829721	1.91067	0.00128984	0.0158203	0.0126442	613	tags=36%, list=5%, signal=35%	CTHRC1/PTK7/CELSR1/WNT5A
CC	GO:0043235	receptor complex	200	0.480719	1.90932	9.01706e-07	4.25203e-05	3.39839e-05	1279	tags=28%, list=10%, signal=25%	PLXDC1/KCTD12/CRLF1/PDGFRB/EMILIN1/ITGBL1/PDGFRA/DDR2/KCTD16/ITGAL/ITGB3/DLG4/TRAF5/PLXND1/PLA2R1/PORCN/CNIH3/OSMR/ENG/DRD1/ITGA5/PLXNC1/LY96/LRP1B/NOTCH3/ITGB6/TRPC1/ITGA1/AXL/ITGA10/TYRO3/IL2RG/NRP1/LIFR/TLR4/IL10RB/ITGA3/TRAF2/ITGB1/TRIL/CHRNE/LRP8/IL4R/GRIN2B/IGF1R/IL6ST/GABRB3/IFNLR1/CD74/NRP2/TGFBR1/DIABLO/IL18R1/ITGAV/LOXL4
BP	GO:0045765	regulation of angiogenesis	181	0.488578	1.9075	4.99162e-07	2.52438e-05	2.01759e-05	2117	tags=36%, list=16%, signal=31%	HSPB6/DCN/CHI3L1/SPARC/ADGRA2/EMILIN1/IL1B/IL1A/JCAD/CREB3L1/THBS2/FOXC2/ITGB3/ADAMTS1/TWIST1/PLXND1/ANGPTL4/ENG/FOXC1/HIF1A/ADAMTS9/ITGA5/COL4A2/SPHK1/WNT5A/COL4A3/HMGA2/SULF1/ZC3H12A/NRP1/EFNA1/FGF1/ITGB1/ETS1/VEGFB/RUNX1/EFNA3/SERPINE1/EPN2/EMILIN2/CTNNB1/LRG1/ADAM12/F3/VASH2/THBS1/SPRED1/ANGPT2/CXCL8/STAT3/PPARG/ERAP1/TNFAIP3/ITGB8/CD40/BTG1/MECP2/ATP2B4/PLK2/FUT1/GTF2I/C3/PIK3CD/NIBAN2/PML
BP	GO:0045766	positive regulation of angiogenesis	107	0.528823	1.90742	1.68725e-05	0.000507556	0.000405659	2021	tags=37%, list=15%, signal=32%	HSPB6/CHI3L1/EMILIN1/IL1B/IL1A/JCAD/FOXC2/ITGB3/TWIST1/ANGPTL4/ENG/HIF1A/ITGA5/SPHK1/WNT5A/HMGA2/ZC3H12A/NRP1/FGF1/ITGB1/ETS1/VEGFB/RUNX1/SERPINE1/EMILIN2/LRG1/ADAM12/F3/VASH2/THBS1/ANGPT2/CXCL8/STAT3/ERAP1/ITGB8/CD40/BTG1/FUT1/C3/PIK3CD
BP	GO:1904018	positive regulation of vasculature development	107	0.528823	1.90742	1.68725e-05	0.000507556	0.000405659	2021	tags=37%, list=15%, signal=32%	HSPB6/CHI3L1/EMILIN1/IL1B/IL1A/JCAD/FOXC2/ITGB3/TWIST1/ANGPTL4/ENG/HIF1A/ITGA5/SPHK1/WNT5A/HMGA2/ZC3H12A/NRP1/FGF1/ITGB1/ETS1/VEGFB/RUNX1/SERPINE1/EMILIN2/LRG1/ADAM12/F3/VASH2/THBS1/ANGPT2/CXCL8/STAT3/ERAP1/ITGB8/CD40/BTG1/FUT1/C3/PIK3CD
CC	GO:0098982	GABA-ergic synapse	31	0.655505	1.90661	0.000881755	0.0117663	0.00940409	610	tags=26%, list=5%, signal=25%	LPAR1/SV2A/EFNA5/KCNC2/LRRTM2/DRD1/LRFN4/KCND3
BP	GO:0042476	odontogenesis	85	0.545376	1.90412	2.89247e-05	0.000791628	0.000632701	1181	tags=29%, list=9%, signal=27%	AMTN/COL1A2/COL1A1/ODAPH/GLI3/PDGFRA/FAM20A/RUNX2/SNX10/FOXC1/RELT/CSF1/TGFB3/ITGB6/BCL2L11/SHH/LRP4/GLI2/OSR1/TNC/SERPINE1/AQP3/TP63/CTNNB1/ALPL
BP	GO:0036303	lymph vessel morphogenesis	14	0.783167	1.90361	0.000649611	0.0092147	0.00736475	403	tags=21%, list=3%, signal=21%	PDPN/FOXC2/FOXC1
CC	GO:0001527	microfibril	10	0.854119	1.90319	0.000474195	0.00724159	0.00578777	977	tags=70%, list=7%, signal=65%	EFEMP2/MFAP2/FBN1/ADAMTS10/MFAP5/LTBP1/LTBP4
MF	GO:0038023	signaling receptor activity	439	0.443984	1.89832	1e-10	1.55089e-08	1.23953e-08	1370	tags=26%, list=10%, signal=24%	LPAR1/REG1A/PTK7/ANTXR1/CRLF1/PDGFRB/ADGRA2/PDE3A/EDNRA/PDGFRA/DDR2/CCR1/ACKR2/ITGAL/MC1R/GRM5/ITGB3/LAG3/DMBT1/ICAM1/EFEMP1/ADGRF4/SCTR/HRH1/PLXND1/TLR5/PTGFR/MRC2/PLA2R1/DNER/NOD1/NPR3/FCMR/COLEC12/IL20RA/MRGPRF/OSMR/ENG/LBP/DRD1/PTPRE/EPHA4/EPHB2/ADGRG1/CELSR1/CSPG4/PLXNC1/LY96/ADGRD1/SLC22A17/IL1R1/ADRA1B/SPHK1/NOTCH3/NID1/GPR176/AXL/TYRO3/IL2RG/PECAM1/NRP1/LIFR/P2RY2/GPR87/ADRA1D/LTBP1/TLR4/…
MF	GO:0060089	molecular transducer activity	439	0.443984	1.89832	1e-10	1.55089e-08	1.23953e-08	1370	tags=26%, list=10%, signal=24%	LPAR1/REG1A/PTK7/ANTXR1/CRLF1/PDGFRB/ADGRA2/PDE3A/EDNRA/PDGFRA/DDR2/CCR1/ACKR2/ITGAL/MC1R/GRM5/ITGB3/LAG3/DMBT1/ICAM1/EFEMP1/ADGRF4/SCTR/HRH1/PLXND1/TLR5/PTGFR/MRC2/PLA2R1/DNER/NOD1/NPR3/FCMR/COLEC12/IL20RA/MRGPRF/OSMR/ENG/LBP/DRD1/PTPRE/EPHA4/EPHB2/ADGRG1/CELSR1/CSPG4/PLXNC1/LY96/ADGRD1/SLC22A17/IL1R1/ADRA1B/SPHK1/NOTCH3/NID1/GPR176/AXL/TYRO3/IL2RG/PECAM1/NRP1/LIFR/P2RY2/GPR87/ADRA1D/LTBP1/TLR4/…
BP	GO:0030336	negative regulation of cell migration	196	0.478924	1.8961	4.40965e-07	2.29664e-05	1.83556e-05	2385	tags=32%, list=18%, signal=26%	DCN/APOD/THY1/PRKG1/GJA1/EMILIN1/CDH11/IFITM1/MEF2C/CXCL12/IGFBP5/ENG/ZEB2/KRT16/NAV3/EPHA4/ADAMTS9/ADGRG1/TGFB1/WNT11/GNRH1/SHH/SULF1/CCL2/TP53INP1/SERPINE1/TIMP1/PTPRG/DPYSL3/EMILIN2/CD74/APOE/JAG1/WNT4/THBS1/DNAJA4/SPRED1/ANGPT2/ZMYND8/CHRD/STAT3/SRF/PPARG/VCL/LDLRAD4/EPPK1/NBL1/RBBP4/ROBO1/RABGEF1/MECP2/ATP2B4/PLCB1/EVL/FLCN/NHERF1/ARHGAP4/MCC/PTGER4/SRGAP2/TET1/RAP2C
BP	GO:0048569	post-embryonic animal organ development	16	0.766451	1.89451	0.000997823	0.0130165	0.0104033	567	tags=25%, list=4%, signal=24%	MFAP2/FBN1/EFEMP1/BCL2L11
BP	GO:0035050	embryonic heart tube development	58	0.571933	1.89193	0.000391709	0.00628445	0.00502278	1921	tags=34%, list=15%, signal=30%	VANGL2/EDNRA/MEF2C/TBX2/FOXC2/ENG/FOXC1/HIF1A/WNT5A/SHH/CTNNB1/CDC42/DVL1/HES1/SRF/ECE1/SMAD3/ACVR1/PKD2/TEAD2
BP	GO:0032722	positive regulation of chemokine production	42	0.612464	1.89122	0.000346326	0.00564722	0.00451348	1195	tags=31%, list=9%, signal=28%	POSTN/IL1B/TWIST1/IL7/LBP/HIF1A/TGFB1/WNT5A/TLR4/IL4R/CD74/EGR1/ADAM17
BP	GO:0001736	establishment of planar polarity	58	0.571057	1.88903	0.0004107	0.00648479	0.0051829	2236	tags=36%, list=17%, signal=30%	VANGL2/CTHRC1/PTK7/DACT1/PLEKHA4/CELSR1/WNT11/WNT5A/WNT7A/TP63/PRICKLE2/CDC42/NPHP1/CELSR2/DVL1/SMURF1/INTU/JHY/WDPCP/FZD6/NKD1
BP	GO:0007164	establishment of tissue polarity	58	0.571057	1.88903	0.0004107	0.00648479	0.0051829	2236	tags=36%, list=17%, signal=30%	VANGL2/CTHRC1/PTK7/DACT1/PLEKHA4/CELSR1/WNT11/WNT5A/WNT7A/TP63/PRICKLE2/CDC42/NPHP1/CELSR2/DVL1/SMURF1/INTU/JHY/WDPCP/FZD6/NKD1
BP	GO:0045165	cell fate commitment	150	0.498518	1.88854	1.47663e-06	6.64863e-05	5.31385e-05	2138	tags=33%, list=16%, signal=28%	PDPN/SOCS3/GLI3/EDNRA/PRRX1/MIAT/MEF2C/TBX2/RUNX2/FOXC2/GAS1/WNT7B/POU4F1/IL7/CHD3/GDF7/NOTCH3/PRDM1/WNT11/WNT5A/WNT5B/SHH/NRP1/GLI2/WNT7A/ITGB1/CTNNB1/CDON/TGFBR1/PAX6/CDC42/SOX5/JAG1/PTCH1/WNT4/TGFB1I1/HES1/STAT3/EXT1/PPARG/ACVR1/TBX19/RBBP4/EYA2/LMO4/MBD3/RARA/PML/WNT10A
CC	GO:0045211	postsynaptic membrane	116	0.516452	1.88772	9.0293e-06	0.000298652	0.000238694	1888	tags=34%, list=14%, signal=29%	LPAR1/KCTD12/KCTD16/GRM5/KCNC2/ITGB3/PDLIM4/DLG4/CNIH3/SEMA4B/LRRTM2/DRD1/EPHA4/EPHB2/ITGA5/LRFN4/PRRT2/MAGEE1/KCND3/NRP1/ITGA3/SORCS3/CHRNE/PTPRS/LRRC4/GRIN2B/GABRB3/CTNNB1/KCNC1/NRP2/SSPN/HCN1/DNM3/SEMA4C/EFNB2/SORCS2/ANK1/SYNE1/CLSTN1
BP	GO:0090330	regulation of platelet aggregation	18	0.729646	1.88423	0.0011341	0.0142868	0.0114185	1651	tags=39%, list=12%, signal=34%	PDPN/PRKG1/EMILIN1/IL6ST/EMILIN2/SH2B3/SERPINE2
BP	GO:0035909	aorta morphogenesis	25	0.674923	1.884	0.00164829	0.0188646	0.0150773	1689	tags=40%, list=13%, signal=35%	PDGFRB/EFEMP2/TBX2/FKBP10/ENG/ADAMTS9/JAG1/HES1/SRF/EFNB2
BP	GO:0007369	gastrulation	134	0.504938	1.87786	7.42344e-06	0.000256476	0.000204986	1880	tags=29%, list=14%, signal=25%	MMP2/COL8A1/GJA1/COL7A1/COL5A1/SNAI1/COL12A1/COL5A2/FOXC2/ITGB3/FOXC1/MMP14/ITGA5/COL4A2/PHLDB1/WNT11/WNT5A/WNT5B/HMGA2/FN1/OSR1/ITGA3/ITGB1/COL6A1/IL1RN/PLPP3/CTNNB1/ITGAV/DVL1/ACVR2B/TWSG1/LAMA3/SRF/EXT1/SMAD3/ACVR1/TBX19/POFUT2/EYA2
BP	GO:0032602	chemokine production	59	0.564533	1.87752	0.00050311	0.00756725	0.00604804	1706	tags=31%, list=13%, signal=27%	POSTN/APOD/IL1B/TWIST1/IL7/LBP/HIF1A/TGFB1/WNT5A/TLR4/SNAI2/IL4R/CD74/EGR1/ADAM17/MUL1/CXCL6/FOXP1
BP	GO:0032642	regulation of chemokine production	59	0.564533	1.87752	0.00050311	0.00756725	0.00604804	1706	tags=31%, list=13%, signal=27%	POSTN/APOD/IL1B/TWIST1/IL7/LBP/HIF1A/TGFB1/WNT5A/TLR4/SNAI2/IL4R/CD74/EGR1/ADAM17/MUL1/CXCL6/FOXP1
BP	GO:0009886	post-embryonic animal morphogenesis	12	0.808329	1.87665	0.00135999	0.016491	0.0131802	841	tags=42%, list=6%, signal=39%	MFAP2/FBN1/EFEMP1/BCL2L11/LARGE1
BP	GO:0072577	endothelial cell apoptotic process	36	0.618762	1.8752	0.00118074	0.0147677	0.0118029	2375	tags=53%, list=18%, signal=43%	CD248/ITGB3/ICAM1/ANGPTL4/TGFB1/COL4A3/FGG/CCL2/GAS6/SERPINE1/FGA/FGB/THBS1/TNFAIP3/SCG2/CD40/ANGPT1/TNIP2/BMPR2
BP	GO:0040017	positive regulation of locomotion	401	0.440421	1.87437	7.53761e-10	9.06045e-08	7.24147e-08	2071	tags=28%, list=16%, signal=24%	PDPN/MMP2/POSTN/LPAR1/DUOXA2/DUOX2/DAAM2/THY1/SPARC/PDGFRB/COL1A1/ADGRA2/IL1B/PDGFRA/DDR2/IL1A/CCR1/SNAI1/DUOX1/PREX1/JCAD/SYDE1/CXCL12/FOXC2/ITGB3/TNFSF14/ICAM1/ADAMTS1/TWIST1/IGFBP5/SEMA4B/HAS2/LBP/FERMT3/DRD1/EPHA4/HIF1A/MMP14/EPHB2/ITGA5/RAC2/TGFB1/CSF1/IL1R1/SPHK1/WNT5A/WNT5B/PLAU/SOD2/PECAM1/FN1/ZC3H12A/NRP1/LAMC2/WNT7A/TLR4/ITGA3/FGF1/SNAI2/ITGB1/ETS1/VEGFB/CAMK1D/GAS6/SERPINE1/PLPP3/PTP4A…
BP	GO:2000147	positive regulation of cell motility	395	0.442719	1.87322	7.65964e-10	9.06045e-08	7.24147e-08	2071	tags=28%, list=16%, signal=24%	PDPN/MMP2/POSTN/LPAR1/DUOXA2/DUOX2/DAAM2/THY1/SPARC/PDGFRB/COL1A1/ADGRA2/IL1B/PDGFRA/DDR2/IL1A/CCR1/SNAI1/DUOX1/PREX1/JCAD/SYDE1/CXCL12/FOXC2/ITGB3/TNFSF14/ICAM1/ADAMTS1/TWIST1/IGFBP5/SEMA4B/HAS2/LBP/FERMT3/DRD1/EPHA4/HIF1A/MMP14/EPHB2/ITGA5/RAC2/TGFB1/CSF1/IL1R1/SPHK1/WNT5A/WNT5B/PLAU/SOD2/PECAM1/FN1/ZC3H12A/NRP1/LAMC2/WNT7A/TLR4/ITGA3/FGF1/SNAI2/ITGB1/ETS1/VEGFB/CAMK1D/GAS6/SERPINE1/PLPP3/PTP4A…
BP	GO:0021915	neural tube development	130	0.502934	1.87292	1.49077e-05	0.000468349	0.000374323	2248	tags=30%, list=17%, signal=25%	VANGL2/CTHRC1/PTK7/DACT1/GLI3/DZIP1L/TWIST1/GDF7/HIF1A/CELSR1/TGFB1/WNT5A/SHH/GLI2/SDC4/TBC1D32/PAX6/IFT140/ZFP36L1/PTCH1/DVL1/HES1/CHRD/CDK20/INTU/RARG/SEMA4C/CECR2/PKD2/LMO4/TEAD2/PLXNB2/MTHFR/SEMA3C/PHACTR4/RARA/WDPCP/FZD6/GPR161
CC	GO:0098637	protein complex involved in cell-matrix adhesion	11	0.813078	1.87235	0.00255511	0.0259943	0.0207757	1044	tags=55%, list=8%, signal=50%	LAMA2/EMILIN1/NID1/PLAU/TNC/EMILIN2
BP	GO:0090594	inflammatory response to wounding	18	0.725018	1.87228	0.00142	0.0170086	0.013594	1560	tags=44%, list=12%, signal=39%	IL1A/HIF1A/TGFB1/NFKBIZ/TLR4/TIMP1/STAT3/PPARG
BP	GO:0009954	proximal/distal pattern formation	12	0.80613	1.87155	0.00141705	0.0170086	0.013594	1063	tags=75%, list=8%, signal=69%	IRX3/GLI3/CHSY1/GLI1/LRP4/GLI2/OSR1/TP63/CTNNB1
BP	GO:0031589	cell-substrate adhesion	255	0.457491	1.87065	1.2371e-07	8.38225e-06	6.69942e-06	1450	tags=25%, list=11%, signal=23%	PDPN/POSTN/COL8A1/APOD/THY1/ANTXR1/COL1A1/EFEMP2/EMILIN1/ITGBL1/CDH11/ITGAL/PREX1/FBLN5/EFNA5/NID2/ITGB3/CCDC80/FMN1/HAS2/CORO2B/ACER2/FERMT3/MMP14/ADAMTS9/ITGA5/RAC2/COL16A1/CSF1/ITGB6/BCL2L11/NID1/ITGA1/AXL/PLAU/ITGA10/TYRO3/FN1/NRP1/EFNA1/FGG/ITGA3/ITGB1/ABI3BP/GAS6/LIMS2/SERPINE1/PDGFB/FGA/CTNNB1/LYPD3/RIN2/SDC4/SPOCK1/FGB/CDKN2A/ITGAV/CDC42/FBLN1/JAG1/WNT4/SPRY4/THBS1/ANGPT2/FERMT2
BP	GO:2000146	negative regulation of cell motility	206	0.470384	1.87017	9.52855e-07	4.40396e-05	3.51982e-05	2385	tags=31%, list=18%, signal=25%	DCN/APOD/THY1/PRKG1/GJA1/EMILIN1/CDH11/IFITM1/MEF2C/CXCL12/IGFBP5/ENG/ZEB2/KRT16/NAV3/EPHA4/ADAMTS9/ADGRG1/TGFB1/WNT11/GNRH1/SHH/SULF1/CCL2/TP53INP1/SERPINE1/TIMP1/PTPRG/DPYSL3/EMILIN2/CD74/FBLN1/APOE/JAG1/WNT4/THBS1/DNAJA4/SPRED1/ANGPT2/ZMYND8/CHRD/STAT3/SRF/PPARG/VCL/LDLRAD4/EPPK1/NBL1/RBBP4/ROBO1/RABGEF1/MECP2/ATP2B4/PLCB1/EVL/FLCN/NHERF1/ARHGAP4/MCC/PTGER4/SRGAP2/TET1/RAP2C
BP	GO:0048568	embryonic organ development	283	0.453426	1.86701	5.85292e-08	4.21109e-06	3.36567e-06	1818	tags=27%, list=14%, signal=24%	VANGL2/CTHRC1/PTK7/SOCS3/GLI3/EDNRA/PDGFRA/PRRX1/SNAI1/MFAP2/MEF2C/TBX2/FBN1/RUNX2/FOXC2/EFEMP1/MDFI/TWIST1/IGF2/CHST11/ZEB1/GLI1/WNT7B/HOXB2/ENG/FOXC1/HIF1A/MMP14/EPHB2/TGFB1/JUNB/MFAP5/TGFB3/PRDM1/WNT11/WNT5A/SHH/GLI2/EFNA1/OSR1/RPL38/CEBPB/FOXE1/WHRN/HESX1/PDGFB/CTNNB1/MBD2/SLC39A1/TGFBR1/PAX6/IFT140/ZFP36L1/CDC42/VASH2/LHFPL5/PTCH1/DVL1/A2M/HES1/CXCL8/LRIG1/E2F7/CDK20/SRF/SH2B3/SOBP/SALL1/ECE…
BP	GO:2000648	positive regulation of stem cell proliferation	28	0.653402	1.86638	0.00113858	0.0143174	0.0114431	1450	tags=39%, list=11%, signal=35%	GJA1/PRRX1/RUNX2/TGFB1/WNT5A/HMGA2/TP63/CTNNB1/TGFBR1/LTBP3/FERMT2
BP	GO:0001837	epithelial to mesenchymal transition	123	0.502593	1.86499	1.25886e-05	0.000406739	0.000325082	1891	tags=30%, list=14%, signal=26%	PDPN/COL1A1/EDNRA/IL1B/SNAI1/AKNA/TWIST1/HAS2/ENG/FOXC1/SPRED3/EPHA4/HIF1A/TGFB1/TGFB3/PHLDB1/WNT11/WNT5A/HMGA2/EFNA1/SNAI2/CTNNB1/LRG1/TGFBR1/SLC39A10/JAG1/LOXL2/WNT4/TGFB1I1/SPRED1/FERMT2/LDLRAD4/SMAD3/ACVR1/WWTR1/POFUT2/FLNA
BP	GO:1904645	response to amyloid-beta	29	0.643036	1.86047	0.00154747	0.0181815	0.0145314	1027	tags=38%, list=8%, signal=35%	MMP2/GJA1/MMP3/CACNB1/GRM5/ICAM1/EPHA4/EPHB2/CACNA1A/TLR4/IGF1R
BP	GO:0055093	response to hyperoxia	16	0.752521	1.86008	0.00204521	0.0218919	0.0174969	680	tags=25%, list=5%, signal=24%	PDPN/MMP2/COL1A1/SOD2
CC	GO:0098802	plasma membrane signaling receptor complex	91	0.529749	1.85854	2.76628e-05	0.000763078	0.000609883	1891	tags=36%, list=14%, signal=31%	EMILIN1/ITGBL1/ITGAL/ITGB3/DLG4/TRAF5/PORCN/CNIH3/OSMR/DRD1/ITGA5/ITGB6/ITGA1/ITGA10/IL10RB/ITGA3/TRAF2/ITGB1/CHRNE/GRIN2B/IGF1R/IL6ST/IFNLR1/TGFBR1/DIABLO/IL18R1/ITGAV/ACVR2B/ITGB8/ACVR1/IKBKB/CD40/FLNA
BP	GO:0031649	heat generation	10	0.83396	1.85827	0.00100068	0.0130293	0.0104136	123	tags=30%, list=1%, signal=30%	IL1B/IL1A/PTGES
BP	GO:2000300	regulation of synaptic vesicle exocytosis	26	0.659436	1.85818	0.00231322	0.0241306	0.0192862	734	tags=15%, list=6%, signal=15%	SYT1/SYP/RIMS3/WNT7A
MF	GO:0005198	structural molecule activity	494	0.428431	1.85768	1e-10	1.55089e-08	1.23953e-08	1367	tags=21%, list=10%, signal=19%	MGP/HSPB6/POSTN/AEBP1/COL8A1/COL1A2/LAMA2/DCN/CTHRC1/CHI3L1/SPARC/PXDN/COL1A1/EFEMP2/EMILIN1/MXRA5/COL6A2/COL7A1/LTBP2/HMCN1/KRT81/COL5A1/PCOLCE/MARVELD1/COL6A3/IGFBP7/MYL9/LUM/KRT6A/MFAP2/BGN/COL12A1/KRT17/TPM2/FBLN5/H4C5/FBN1/THBS2/MYL11/COL5A2/NID2/EFEMP1/CLDN11/KRT16/PKP1/COL4A1/COL16A1/VWA1/MFAP5/COL4A2/RPS27/NID1/RPS29/COL4A4/RPL37/MAP1A/MYOM1/COL4A3/COL15A1/FN1/LAMC2/FGG/LTBP1/CLTCL1/RPL37…
BP	GO:0031214	biomineral tissue development	107	0.514866	1.85708	5.03916e-05	0.00122112	0.000975968	1420	tags=25%, list=11%, signal=23%	MGP/AMTN/COL1A2/SRGN/COL1A1/ODAPH/DDR2/CCR1/MEF2C/FAM20A/TWIST1/LOX/SNX10/HIF1A/TGFB1/ITGB6/WNT11/OSR1/FOSL2/CEBPB/GAS6/SPP1/ALPL/SLC20A1/LTBP3/WNT4/ACVR2B
BP	GO:0030318	melanocyte differentiation	16	0.750742	1.85568	0.00212464	0.022569	0.018038	464	tags=31%, list=4%, signal=30%	TYRP1/GLI3/MEF2C/ZEB2/ADAMTS9
BP	GO:0021554	optic nerve development	13	0.77906	1.85405	0.00159907	0.0185622	0.0148356	1556	tags=54%, list=12%, signal=48%	LPAR1/GLI3/NDP/KCNC2/EPHB2/KCNC1/EXT1
CC	GO:0097060	synaptic membrane	182	0.474227	1.85232	1.99591e-06	8.59843e-05	6.87221e-05	2326	tags=35%, list=18%, signal=29%	SYT1/LPAR1/KCTD12/SYP/KCTD16/GRM5/SYDE1/KCNC2/ITGB3/PDLIM4/DLG4/RIMS3/CNIH3/SEMA4B/STX1A/LRRTM2/DRD1/EPHA4/EPHB2/ITGA5/SNAP25/LRFN4/PRRT2/MAGEE1/KCND3/SLC1A7/LRP4/STX11/NRP1/ITGA3/SORCS3/ITGB1/DNM1/CHRNE/PTPRS/LRRC4/GRIN2B/GABRB3/CTNNB1/KCNC1/NRP2/PPP1R9B/SSPN/HCN1/DNM3/SEMA4C/EFNB2/SORCS2/STXBP1/ANK1/SYNE1/CLSTN1/ATP2B4/MTMR2/FLRT3/ZDHHC17/SYT11/STX2/SLC6A9/FBXO2/NRXN2/DBN1/SRGAP2
BP	GO:0007411	axon guidance	130	0.49736	1.85217	2.16309e-05	0.000621244	0.000496523	2072	tags=38%, list=16%, signal=32%	LAMA2/PTK7/GLI3/EDNRA/NDP/EFNA5/CXCL12/DRAXIN/KIF5A/PLXND1/SEMA4B/GDF7/EPHA4/EPHB2/PLXNC1/NOTCH3/FLRT2/WNT5A/ROBO3/SHH/KLF7/NRP1/GLI2/EFNA1/ETV1/EFNA3/NRP2/ADAM17/EGR2/EMB/PAX6/B3GNT2/ARHGEF40/PTCH1/DVL1/TUBB3/EXT1/EFNA2/ECE1/SEMA4C/EFNB2/PLXNA1/ROBO1/LMO4/FLRT3/PLXNB2/NCAM1/SEMA3C/NIBAN2
BP	GO:0097485	neuron projection guidance	130	0.49736	1.85217	2.16309e-05	0.000621244	0.000496523	2072	tags=38%, list=16%, signal=32%	LAMA2/PTK7/GLI3/EDNRA/NDP/EFNA5/CXCL12/DRAXIN/KIF5A/PLXND1/SEMA4B/GDF7/EPHA4/EPHB2/PLXNC1/NOTCH3/FLRT2/WNT5A/ROBO3/SHH/KLF7/NRP1/GLI2/EFNA1/ETV1/EFNA3/NRP2/ADAM17/EGR2/EMB/PAX6/B3GNT2/ARHGEF40/PTCH1/DVL1/TUBB3/EXT1/EFNA2/ECE1/SEMA4C/EFNB2/PLXNA1/ROBO1/LMO4/FLRT3/PLXNB2/NCAM1/SEMA3C/NIBAN2
BP	GO:0060041	retina development in camera-type eye	89	0.525967	1.85182	6.47795e-05	0.00152221	0.00121661	1548	tags=28%, list=12%, signal=25%	THY1/PDGFRB/PDGFRA/NDP/DIO3/VSTM4/HIF1A/COL4A1/FAT3/PRDM1/NRP1/LARGE1/PDE6B/CDON/CASP2/GDF11/SMARCD3/TBC1D32/PAX6/HCN1/ZNF513/NPHP1/ACVR2B/HES1/STAT3
BP	GO:1905517	macrophage migration	29	0.639182	1.84932	0.00195623	0.0213655	0.0170761	1394	tags=28%, list=11%, signal=25%	MMP2/EMILIN1/MMP14/CSF1/CCL2/MTUS1/CKLF/THBS1
BP	GO:0016079	synaptic vesicle exocytosis	60	0.554884	1.84607	0.000406304	0.00644454	0.00515074	821	tags=20%, list=6%, signal=19%	SYT1/SYP/SV2A/RIMS3/STX1A/DOC2A/SNAP25/PRRT2/SYT12/STX11/WNT7A/NAPB
CC	GO:0098797	plasma membrane protein complex	300	0.447226	1.84538	3.59855e-08	2.72981e-06	2.18177e-06	1420	tags=22%, list=11%, signal=20%	SCN4B/DUOX2/GJA1/KCNN1/EMILIN1/KCNJ6/ITGBL1/CDH11/CACNB1/ITGAL/SGCA/DUOX1/C9/KCNC2/ITGB3/C7/DLG4/TRAF5/STAC3/EVC2/SGIP1/PORCN/CNIH3/OSMR/GNG11/DRD1/CACHD1/ITGA5/KCNA7/RAC2/KCNE5/CACNA1A/KCNN4/C8B/ITGB6/KCND3/ITGA1/NCF2/ITGA10/KCNJ14/PDE4D/IL10RB/ITGA3/TRAF2/ITGB1/CDH6/CHRNE/KCNMB4/CDH3/GRIN2B/IGF1R/IL6ST/IFNLR1/CTNNB1/KCNC1/CDH2/CD74/TGFBR1/DIABLO/SSPN/HCN1/IL18R1/ITGAV/AP2B1/FXYD2/CBL/ACVR2B
BP	GO:0042462	eye photoreceptor cell development	15	0.752744	1.84465	0.00149543	0.0176293	0.0140901	1270	tags=40%, list=10%, signal=36%	THY1/DIO3/PRDM1/DZANK1/PAX6/HCN1
BP	GO:0048705	skeletal system morphogenesis	136	0.49271	1.84079	1.59503e-05	0.000490384	0.000391935	1696	tags=28%, list=13%, signal=25%	MGP/MMP2/COL1A1/HHIP/GLI3/PDGFRA/PRRX1/MEF2C/RUNX2/FOXC2/CHSY1/MDFI/TWIST1/CHST11/ZEB1/FMN1/HOXB2/HAS2/FOXC1/MMP14/TGFB3/OSR1/WNT7A/FOSL2/CTNNB1/SLC39A1/ALPL/TGFBR1/IFT140/NPR2/SOX5/LTBP3/ACVR2B/NAB2/EXT1/SERPINH1/RARG/SMAD3
BP	GO:0032677	regulation of interleukin-8 production	53	0.564193	1.83968	0.000686625	0.00966532	0.00772491	1548	tags=28%, list=12%, signal=25%	CHI3L1/IL1B/AFAP1L2/TLR5/NOD1/LBP/BCL3/SSC5D/WNT5A/TLR4/CRP/SERPINE1/CD74/F3/STAT3
BP	GO:0045667	regulation of osteoblast differentiation	85	0.526792	1.83923	0.000108368	0.00231995	0.0018542	1744	tags=34%, list=13%, signal=30%	CTHRC1/GLI3/DDR2/IFITM1/MEF2C/RANBP3L/RUNX2/TWIST1/IGFBP5/GLI1/WNT7B/CEBPB/SNAI2/CEBPD/TP63/IL6ST/CTNNB1/NOCT/JAG1/PTCH1/WNT4/ACVR2B/TWSG1/FERMT2/CHRD/PPARG/SMAD3/ACVR1/WWTR1
BP	GO:1904861	excitatory synapse assembly	18	0.712032	1.83874	0.00235601	0.0244318	0.0195269	2326	tags=56%, list=18%, signal=46%	LRRTM2/LRFN4/WNT5A/WNT7A/PTPN13/PTPRS/LRRC4/PLXNB2/NRXN2/SRGAP2
BP	GO:0062009	secondary palate development	19	0.704738	1.83725	0.00276019	0.027778	0.0222013	810	tags=37%, list=6%, signal=35%	LRRC32/TGFB3/ITGB6/WNT11/WNT5A/WNT7A/FOXE1
BP	GO:0010714	positive regulation of collagen metabolic process	21	0.683576	1.83719	0.00342595	0.032284	0.0258027	1374	tags=38%, list=10%, signal=34%	DDR2/CREB3L1/ENG/TGFB1/TGFB3/LARP6/RUNX1/WNT4
BP	GO:0048762	mesenchymal cell differentiation	177	0.471984	1.837	7.12721e-06	0.000249944	0.000199765	1744	tags=29%, list=13%, signal=25%	PDPN/COL1A1/EDNRA/IL1B/SNAI1/MEF2C/RANBP3L/FOXC2/AKNA/TWIST1/NRTN/SEMA4B/HAS2/ENG/FOXC1/SPRED3/EPHA4/HIF1A/TGFB1/TGFB3/PHLDB1/WNT11/WNT5A/SHH/HMGA2/FN1/NRP1/EFNA1/OSR1/SNAI2/CTNNB1/LRG1/CDH2/NRP2/TGFBR1/SLC39A10/PAX6/CDC42/JAG1/LOXL2/WNT4/TGFB1I1/SPRED1/FERMT2/HES1/EXT1/LDLRAD4/SEMA4C/SMAD3/ACVR1/WWTR1
BP	GO:0007507	heart development	416	0.430724	1.83475	1.649e-09	1.80116e-07	1.43955e-07	1980	tags=27%, list=15%, signal=23%	MMP2/VANGL2/IRX3/PTK7/HOPX/PDGFRB/PRKG1/GLI3/GJA1/EDNRA/EMILIN1/PDGFRA/IL1A/CDH11/COL5A1/SNAI1/MEF2C/TBX2/FBN1/WIF1/FOXC2/PDLIM4/ADAMTS1/TWIST1/LOX/GLI1/PLXND1/BASP1/FHOD3/HAS2/ALPK3/ENG/POU4F1/FOXC1/RGS4/NFATC1/HIF1A/ADAMTS9/ADAMTS6/TGFB1/PRDM1/WNT11/FLRT2/WNT5A/POU6F1/SHH/DNAH11/SOD2/DZIP1/FN1/NRP1/GLI2/EFNA1/OSR1/ITGA3/SNAI2/ODAD4/ITGB1/VEGFB/RUNX1/LARGE1/PDGFB/IGF1R/FOXL1/CTNNB1/MBD2/NRP2/TGF…
BP	GO:0009612	response to mechanical stimulus	135	0.492121	1.83393	2.38741e-05	0.000669146	0.000534808	1850	tags=32%, list=14%, signal=28%	MMP2/POSTN/CHI3L1/COL1A1/IL1B/DDR2/CXCL12/ITGB3/TNFSF14/TLR5/ENG/MMP14/WNT11/ETV1/TLR4/WHRN/LRP11/LARGE1/TNC/ANKRD23/IGF1R/CTNNB1/MBD2/SLC2A1/KCNC1/CDH2/CASP2/FOS/CLCN6/LHFPL5/PTCH1/THBS1/ANGPT2/FOSB/SERPINE2/SLC38A2/IRF1/PDZD7/TMEM87A/SLC9A1/PLEC/PKD2/CD40
BP	GO:0001738	morphogenesis of a polarized epithelium	73	0.540932	1.83362	0.000159059	0.00310944	0.00248519	2236	tags=33%, list=17%, signal=27%	VANGL2/CTHRC1/PTK7/DACT1/PLEKHA4/CELSR1/WNT11/WNT5A/WNT7A/TP63/PRICKLE2/CDC42/NPHP1/CELSR2/DVL1/SMURF1/MSN/INTU/JHY/MYO9A/WDPCP/NHERF1/FZD6/NKD1
BP	GO:0010810	regulation of cell-substrate adhesion	169	0.4719	1.83347	2.57723e-06	0.000109009	8.71242e-05	1450	tags=27%, list=11%, signal=24%	PDPN/POSTN/COL8A1/APOD/THY1/COL1A1/EFEMP2/EMILIN1/PREX1/EFNA5/ITGB3/CCDC80/FMN1/HAS2/CORO2B/ACER2/MMP14/ITGA5/RAC2/COL16A1/CSF1/NID1/PLAU/FN1/NRP1/FGG/ITGA3/ABI3BP/LIMS2/SERPINE1/PDGFB/FGA/RIN2/SDC4/SPOCK1/FGB/CDKN2A/CDC42/FBLN1/JAG1/WNT4/SPRY4/THBS1/ANGPT2/FERMT2
BP	GO:0048663	neuron fate commitment	30	0.630587	1.83342	0.00369705	0.0342198	0.0273498	1308	tags=33%, list=10%, signal=30%	GLI3/PRRX1/POU4F1/NOTCH3/SHH/GLI2/CTNNB1/TGFBR1/PAX6/CDC42
BP	GO:0048593	camera-type eye morphogenesis	83	0.528622	1.83331	0.000118055	0.00250427	0.00200151	1619	tags=28%, list=12%, signal=24%	COL8A1/THY1/GLI3/NDP/TBX2/TWIST1/ZEB1/DIO3/HIF1A/EPHB2/FAT3/PRDM1/WNT5A/LARGE1/CTNNB1/CDON/GDF11/PAX6/HCN1/JAG1/C12orf57/STAT3/SHROOM2
BP	GO:0048641	regulation of skeletal muscle tissue development	15	0.747542	1.83191	0.00171045	0.0194735	0.015564	1130	tags=47%, list=9%, signal=43%	MEF2C/TWIST1/IGF2/TGFB1/SHH/CTNNB1/CDON
BP	GO:0001656	metanephros development	52	0.561525	1.83154	0.00121926	0.015114	0.0120797	1889	tags=42%, list=14%, signal=36%	IRX3/PDGFRB/GLI3/PDGFRA/FBN1/FOXC2/BASP1/FMN1/WNT7B/SHH/OSR1/PDGFB/CTNNB1/EGR1/GDF11/PTCH1/WNT4/HES1/SALL1/WWTR1/PKD2/GREB1L
BP	GO:0002062	chondrocyte differentiation	85	0.52445	1.83105	0.000139933	0.00281439	0.00224937	1753	tags=41%, list=13%, signal=36%	GLI3/MEF2C/RUNX2/MBOAT2/CHSY1/EFEMP1/CHST11/HIF1A/TGFB1/WNT5B/HMGA2/SULF1/OSR1/WNT7A/FOSL2/ADAMTS7/SNAI2/RUNX1/SLC26A2/SULF2/CTNNB1/TGFBI/TGFBR1/NPR2/MAF/SOX5/LTBP3/LOXL2/TWSG1/EXT1/SERPINH1/MEX3C/RARG/SMAD3/TRPS1
BP	GO:0003179	heart valve morphogenesis	42	0.592771	1.83041	0.00093303	0.0123093	0.00983808	794	tags=24%, list=6%, signal=22%	EMILIN1/CDH11/SNAI1/MEF2C/TWIST1/NFATC1/ADAMTS9/TGFB1/EFNA1/SNAI2
BP	GO:0010863	positive regulation of phospholipase C activity	14	0.752638	1.82941	0.00183932	0.0206709	0.016521	104	tags=29%, list=1%, signal=28%	LPAR1/PDGFRB/EDNRA/PDGFRA
BP	GO:0030512	negative regulation of transforming growth factor beta receptor signaling pathway	73	0.539006	1.82709	0.000180914	0.00342167	0.00273474	2726	tags=33%, list=21%, signal=26%	EMILIN1/FBN1/PMEPA1/CHST11/HTRA1/SPRED3/TGFB3/LTBP1/CD109/SNX25/ADAM17/SMURF1/SPRED1/PPARG/LDLRAD4/SLC2A10/RBBP4/BMP2/TET1/PEG10/SKI/SMURF2/SKIL/BCL9L
BP	GO:0030947	regulation of vascular endothelial growth factor receptor signaling pathway	23	0.666013	1.82689	0.00288775	0.0286145	0.0228698	2611	tags=57%, list=20%, signal=45%	EMILIN1/IL1B/TMEM204/ITGB3/HIF1A/ITGA5/NRP1/EPN2/CADM4/ROBO1/NIBAN2/GRB10/PTPN1
BP	GO:1901888	regulation of cell junction assembly	130	0.48967	1.82353	3.83229e-05	0.000986922	0.000788787	2166	tags=34%, list=16%, signal=29%	APOD/IRX3/HOPX/THY1/IL1B/ICAM5/SNAI1/MEF2C/EFNA5/THBS2/NEGR1/AMIGO2/FMN1/LRRTM2/MMP14/EPHB2/COL16A1/SNAP25/LRFN4/FLRT2/WNT5A/NRP1/WNT7A/PTPN13/SNAI2/PTPRS/PRKCH/CTNNB1/SDC4/NPHP1/WNT4/THBS1/FERMT2/VCL/SMAD3/SLC9A1/IKBKB/CLSTN1/MAP4K4/FLRT3/DAPK3/TLN1/WDPCP/GPC4
BP	GO:0040037	negative regulation of fibroblast growth factor receptor signaling pathway	13	0.766028	1.82304	0.00286333	0.0284443	0.0227338	1394	tags=54%, list=11%, signal=48%	CREB3L1/WNT5A/SULF1/SULF2/WNT4/SPRY4/THBS1
BP	GO:0007224	smoothened signaling pathway	117	0.497962	1.82299	3.85004e-05	0.000987845	0.000789525	2868	tags=36%, list=22%, signal=28%	HHIP/GLI3/NDP/PRRX1/RUNX2/CHSY1/DZIP1L/GAS1/GLI1/EVC2/TCTN2/RAB34/SHH/DZIP1/GLI2/MAP3K10/CDON/TBC1D32/PAX6/IFT140/PTCH1/HES1/DYNC2H1/CDK20/EXT1/KIF7/SERPINE2/INTU/IQUB/EVC/WDPCP/DYRK2/IFT56/GPR161/RORA/IFT80/MGRN1/NDST1/GPC2/SEPTIN2/TTBK2/FUZ
BP	GO:0060485	mesenchyme development	208	0.458312	1.82278	1.92418e-06	8.34088e-05	6.66637e-05	1921	tags=29%, list=15%, signal=25%	PDPN/PTK7/COL1A1/EDNRA/IL1B/SNAI1/MEF2C/TBX2/RANBP3L/BNC2/FOXC2/AKNA/TWIST1/BASP1/NRTN/SEMA4B/HAS2/ENG/FOXC1/SPRED3/EPHA4/HIF1A/TGFB1/TGFB3/PHLDB1/WNT11/WNT5A/SHH/HMGA2/FN1/NRP1/EFNA1/OSR1/SNAI2/CTNNB1/LRG1/CDH2/NRP2/TGFBR1/SLC39A10/PAX6/ZFP36L1/CDC42/JAG1/LOXL2/WNT4/TGFB1I1/SPRED1/FERMT2/HES1/EXT1/LDLRAD4/SEMA4C/SMAD3/ACVR1/WWTR1/PKD2/ROBO1/POFUT2/FLNA/TEAD2
BP	GO:0003176	aortic valve development	29	0.629748	1.82202	0.00267988	0.027145	0.0216954	794	tags=28%, list=6%, signal=26%	EMILIN1/CDH11/SNAI1/TWIST1/NFATC1/TGFB1/EFNA1/SNAI2
BP	GO:0071605	monocyte chemotactic protein-1 production	14	0.748565	1.8195	0.00220278	0.0232658	0.0185949	287	tags=21%, list=2%, signal=21%	APOD/IL1B/TWIST1
BP	GO:0071637	regulation of monocyte chemotactic protein-1 production	14	0.748565	1.8195	0.00220278	0.0232658	0.0185949	287	tags=21%, list=2%, signal=21%	APOD/IL1B/TWIST1
BP	GO:0003002	regionalization	252	0.445287	1.81801	4.74945e-07	2.41945e-05	1.93372e-05	1878	tags=27%, list=14%, signal=24%	VANGL2/IRX3/DAAM2/HHIP/GLI3/SNAI1/MEF2C/TBX2/WIF1/FOXC2/CHSY1/DZIP1L/CXXC4/MDFI/GLI1/BASP1/WNT7B/HOXB2/ENG/FOXC1/HIF1A/ADGRG1/WNT11/WNT5A/SHH/DNAH11/LRP4/NRP1/GLI2/OSR1/WNT7A/GREM2/FGF1/ODAD4/TP63/CTNNB1/CDON/GDF11/NRP2/TGFBR1/EGR2/SMARCD3/TBC1D32/PAX6/IFT140/CELSR2/PTCH1/DVL1/ACVR2B/HES1/DYNC2H1/CHRD/DNAAF3/CDK20/SRF/EXT1/INTU/MAFB/RARG/CFAP45/SMAD3/ACVR1/NBL1/PBX3/PKD2/BHLHE40/ROBO1/BMP1
BP	GO:0042475	odontogenesis of dentin-containing tooth	60	0.546178	1.81711	0.000690989	0.00969074	0.00774523	1063	tags=30%, list=8%, signal=28%	AMTN/ODAPH/GLI3/PDGFRA/FAM20A/RUNX2/FOXC1/RELT/CSF1/ITGB6/BCL2L11/SHH/LRP4/GLI2/TNC/SERPINE1/TP63/CTNNB1
BP	GO:1904752	regulation of vascular associated smooth muscle cell migration	20	0.682951	1.81608	0.0022226	0.023396	0.018699	295	tags=25%, list=2%, signal=24%	PRKG1/DDR2/MEF2C/ADAMTS1/IGFBP5
BP	GO:0001838	embryonic epithelial tube formation	93	0.514423	1.81599	0.000230971	0.00417602	0.00333764	2203	tags=29%, list=17%, signal=24%	VANGL2/CTHRC1/IRX3/PTK7/TWIST1/GDF7/HIF1A/CELSR1/TGFB1/WNT5A/OSR1/CTNNB1/SDC4/PTCH1/WNT4/DVL1/CDK20/RARG/SEMA4C/CECR2/LMO4/TEAD2/PLXNB2/MTHFR/PHACTR4/RARA/FZD6
BP	GO:1900274	regulation of phospholipase C activity	16	0.734651	1.81591	0.00339542	0.0321528	0.0256978	104	tags=25%, list=1%, signal=25%	LPAR1/PDGFRB/EDNRA/PDGFRA
BP	GO:0072567	chemokine (C-X-C motif) ligand 2 production	14	0.747036	1.81579	0.00239432	0.0247189	0.0197563	1706	tags=36%, list=13%, signal=31%	POSTN/TGFB1/TLR4/CD74/FOXP1
BP	GO:2000341	regulation of chemokine (C-X-C motif) ligand 2 production	14	0.747036	1.81579	0.00239432	0.0247189	0.0197563	1706	tags=36%, list=13%, signal=31%	POSTN/TGFB1/TLR4/CD74/FOXP1
BP	GO:0042743	hydrogen peroxide metabolic process	34	0.607807	1.81493	0.00241495	0.0248217	0.0198385	680	tags=26%, list=5%, signal=25%	DUOXA2/DUOX2/DUOXA1/PXDN/HP/DUOX1/RAC2/APOA4/SOD2
BP	GO:1900024	regulation of substrate adhesion-dependent cell spreading	56	0.549853	1.81488	0.00101974	0.0131868	0.0105394	1450	tags=27%, list=11%, signal=24%	PDPN/POSTN/PREX1/EFNA5/ITGB3/HAS2/NRP1/FGG/LIMS2/FGA/FGB/CDC42/FBLN1/SPRY4/FERMT2
BP	GO:0030278	regulation of ossification	77	0.528195	1.814	0.000178609	0.00340244	0.00271936	1702	tags=27%, list=13%, signal=24%	MGP/SRGN/DDR2/CCR1/MEF2C/RUNX2/CHSY1/TWIST1/HIF1A/CSF1/WNT5A/LRP4/OSR1/KREMEN1/EGR2/LTBP3/WNT4/ACVR2B/INTU/SMAD3/ACVR1
BP	GO:1904738	vascular associated smooth muscle cell migration	22	0.673603	1.81379	0.0030842	0.0299786	0.0239601	3394	tags=68%, list=26%, signal=51%	PRKG1/DDR2/MEF2C/ADAMTS1/IGFBP5/PDGFB/DOCK4/GRB10/GNA12/ATP7A/SSH1/TPM1/MDM2/MAP3K7/BMP4
BP	GO:0009799	specification of symmetry	95	0.51153	1.81292	7.38295e-05	0.00170051	0.00135912	1818	tags=26%, list=14%, signal=23%	VANGL2/DAAM2/MEF2C/TBX2/WIF1/ENG/HIF1A/WNT5A/SHH/DNAH11/GREM2/ODAD4/CTNNB1/TBC1D32/IFT140/DVL1/ACVR2B/DYNC2H1/DNAAF3/SRF/CFAP45/SMAD3/ACVR1/NBL1/PKD2
BP	GO:0009855	determination of bilateral symmetry	95	0.51153	1.81292	7.38295e-05	0.00170051	0.00135912	1818	tags=26%, list=14%, signal=23%	VANGL2/DAAM2/MEF2C/TBX2/WIF1/ENG/HIF1A/WNT5A/SHH/DNAH11/GREM2/ODAD4/CTNNB1/TBC1D32/IFT140/DVL1/ACVR2B/DYNC2H1/DNAAF3/SRF/CFAP45/SMAD3/ACVR1/NBL1/PKD2
CC	GO:0030055	cell-substrate junction	361	0.430257	1.81149	3.71674e-08	2.78915e-06	2.2292e-06	2590	tags=29%, list=20%, signal=24%	PTK7/THY1/FAP/PDGFRB/GJA1/SCARF2/ITGBL1/DDR2/HMCN1/ARHGAP22/FLNC/LAYN/ITGB3/ICAM1/MRC2/TGM2/CORO2B/ENG/ARHGAP31/FERMT3/MMP14/ITGA5/RAC2/CSPG4/ATP6V0C/ITGB6/RPS29/FLRT2/ITGA1/NHS/PLAU/NRP1/RPL37A/CIB2/ITGA3/RPL38/ITGB1/TNC/LIMS2/RPL31/MCAM/TNS1/CTNNB1/ABCB4/CDH2/TNS3/SDC4/ADAM17/ARPC1B/ITGAV/CDC42/FHL1/SPRY4/CBL/TGFB1I1/RPLP2/FERMT2/DCTN4/LAMA3/MSN/RPL23/SVIL/VCL/EPPK1/EFNB2/ITGB8/PDLIM7/PXN/SLC9A…
BP	GO:0001707	mesoderm formation	45	0.577259	1.81044	0.000603296	0.0086376	0.00690351	1880	tags=38%, list=14%, signal=33%	GJA1/SNAI1/FOXC2/ITGB3/FOXC1/WNT11/WNT5A/HMGA2/ITGA3/ITGB1/TWSG1/SRF/SMAD3/ACVR1/TBX19/POFUT2/EYA2
BP	GO:0031103	axon regeneration	39	0.588659	1.8098	0.00156644	0.0183426	0.0146602	1294	tags=31%, list=10%, signal=28%	MMP2/APOD/EPHA4/APOA4/TNC/PTPRS/SPP1/KREMEN1/IGF1R/RTN4RL1/MAPK8IP3/NREP
BP	GO:0099560	synaptic membrane adhesion	15	0.738497	1.80974	0.00233772	0.0243143	0.019433	2166	tags=67%, list=16%, signal=56%	SPARCL1/EFNA5/LRFN4/ITGA3/CDH6/PTPRS/LRRC4/FLRT3/PTPRF/GPC4
MF	GO:0005109	frizzled binding	22	0.671946	1.80933	0.00324135	0.0310307	0.024801	1402	tags=41%, list=11%, signal=37%	CTHRC1/NDP/WNT7B/WNT11/WNT5A/WNT5B/WNT7A/WNT4/DVL1
BP	GO:0010812	negative regulation of cell-substrate adhesion	42	0.585942	1.80932	0.00145855	0.0172822	0.0138126	1443	tags=36%, list=11%, signal=32%	POSTN/APOD/COL1A1/EFNA5/CORO2B/ACER2/MMP14/SERPINE1/SPOCK1/CDKN2A/FBLN1/JAG1/SPRY4/THBS1/ANGPT2
BP	GO:0048679	regulation of axon regeneration	21	0.672865	1.8084	0.00486283	0.0421063	0.0336531	2735	tags=48%, list=21%, signal=38%	EPHA4/PTPRS/SPP1/KREMEN1/IGF1R/RTN4RL1/FLNA/PTPRF/LRIG2/STK24
BP	GO:0030335	positive regulation of cell migration	383	0.428767	1.80644	2.11186e-08	1.6941e-06	1.35399e-06	2071	tags=28%, list=16%, signal=24%	PDPN/MMP2/POSTN/LPAR1/DAAM2/THY1/SPARC/PDGFRB/COL1A1/ADGRA2/IL1B/PDGFRA/DDR2/IL1A/CCR1/SNAI1/PREX1/JCAD/SYDE1/CXCL12/FOXC2/ITGB3/TNFSF14/ICAM1/ADAMTS1/TWIST1/IGFBP5/SEMA4B/HAS2/LBP/FERMT3/DRD1/EPHA4/HIF1A/MMP14/EPHB2/ITGA5/RAC2/TGFB1/CSF1/IL1R1/SPHK1/WNT5A/WNT5B/PLAU/SOD2/PECAM1/FN1/ZC3H12A/NRP1/LAMC2/WNT7A/TLR4/ITGA3/FGF1/SNAI2/ITGB1/ETS1/VEGFB/CAMK1D/GAS6/SERPINE1/PLPP3/PTP4A1/PDGFB/IGF1R/MCAM/…
BP	GO:0090287	regulation of cellular response to growth factor stimulus	221	0.451235	1.80264	2.84824e-06	0.000119029	9.51327e-05	1786	tags=29%, list=14%, signal=25%	DCN/FSTL1/ADGRA2/HHIP/EMILIN1/IL1B/TMEM204/JCAD/CREB3L1/FBN1/RUNX2/ITGB3/PMEPA1/CHST11/LOX/ZEB1/HTRA1/CHRDL2/ENG/ZEB2/SPRED3/HIF1A/ITGA5/TGFB1/TGFB3/WNT5A/SULF1/NRP1/GREM2/LTBP1/ITGA3/FGF1/CDKN2B/DKK3/CD109/SNX25/LTBP4/SULF2/EPN2/CTNNB1/LRG1/ADAM17/FSTL3/NREP/WNT4/SPRY4/THBS1/SMURF1/TGFB1I1/TWSG1/SPRED1/HES1/CHRD/CTDSPL2/RNF111/PPARG/LDLRAD4/SLC2A10/SMAD3/NBL1/IL12A/CADM4/RBBP4/FERMT1
BP	GO:0021511	spinal cord patterning	11	0.782649	1.80228	0.00536036	0.0447488	0.035765	1659	tags=55%, list=13%, signal=48%	GLI3/SHH/GLI2/GDF11/CHRD/INTU
BP	GO:0010715	regulation of extracellular matrix disassembly	12	0.775702	1.80091	0.00315393	0.0304444	0.0243323	493	tags=33%, list=4%, signal=32%	PDPN/FAP/DDR2/TGFB1
BP	GO:2000351	regulation of endothelial cell apoptotic process	31	0.618567	1.79917	0.00336295	0.0319647	0.0255475	2355	tags=55%, list=18%, signal=45%	CD248/ITGB3/ICAM1/ANGPTL4/TGFB1/FGG/CCL2/GAS6/SERPINE1/FGA/FGB/THBS1/TNFAIP3/SCG2/CD40/ANGPT1/TNIP2
CC	GO:0098978	glutamatergic synapse	257	0.439463	1.79894	3.14111e-06	0.000127452	0.000101865	1980	tags=23%, list=15%, signal=20%	SYT1/LPAR1/PLAT/SRGN/SV2A/ICAM5/CDH11/GRM5/SPARCL1/ARHGAP22/ITGB3/DLG4/PLXND1/PORCN/SEMA4B/LRRTM2/DRD1/EPHA4/EPHB2/ITGA5/DOC2A/PLXNC1/SNAP25/LRFN4/PRRT2/WNT5A/GPC6/STK38L/NRP1/WNT7A/C1QL1/ITGA3/SORCS3/ITGB1/ITPKA/NAPB/CDH6/DNM1/PTPRS/LRRC4/CTNNB1/NRP2/HCN1/CDC42/GUCY1B1/APOE/AP2B1/DVL1/ABLIM3/DNM3/HOMER3/DNAJB1/EFNB2/STXBP1/CLSTN1/FLNA/MECP2/ATP2B4/PLCB1/FLRT3
BP	GO:0021510	spinal cord development	56	0.54465	1.7977	0.0012294	0.0151646	0.0121202	1990	tags=36%, list=15%, signal=30%	PLXDC1/DAAM2/GLI3/DRAXIN/GDF7/SHH/GLI2/PTPRS/LRP8/GDF11/PAX6/PTCH1/DYNC2H1/CHRD/INTU/PBX3/PKD2/LMO4/MECP2/DCTN1
BP	GO:0035455	response to interferon-alpha	14	0.739466	1.79739	0.0032371	0.0310307	0.024801	885	tags=36%, list=7%, signal=33%	IFITM1/IFITM2/AXL/IFITM3/GAS6
BP	GO:0048483	autonomic nervous system development	20	0.675861	1.79723	0.00302044	0.0296063	0.0236625	2415	tags=60%, list=18%, signal=49%	EDNRA/HOXB2/FN1/NRP1/TP63/CTNNB1/NRP2/EGR2/HES1/HLX/PHACTR4/NAV2
BP	GO:0042438	melanin biosynthetic process	16	0.726876	1.79669	0.00490878	0.0424515	0.0339289	923	tags=38%, list=7%, signal=35%	TYRP1/MC1R/ZEB2/TRPC1/WNT5A/CDH3
BP	GO:0060324	face development	41	0.58312	1.79544	0.00250362	0.0255824	0.0204465	613	tags=17%, list=5%, signal=16%	MMP2/COL1A1/CRISPLD2/EDNRA/PDGFRA/TGFB3/WNT5A
BP	GO:0045666	positive regulation of neuron differentiation	54	0.549123	1.79499	0.00172382	0.0195301	0.0156092	2951	tags=46%, list=22%, signal=36%	IRX3/DUOXA1/BEND6/MEF2C/CXCL12/ZEB1/GDF7/SOCS2/TCF4/CDON/PAX6/TRPC5/NBL1/ADRA2C/MMD/SHOC2/RARA/NGF/BMP2/CSNK1D/BCL6/NCOA1/MAP1B/SPAG9/PROX1
BP	GO:0001569	branching involved in blood vessel morphogenesis	24	0.646927	1.79405	0.00477748	0.0416255	0.0332688	1702	tags=42%, list=13%, signal=36%	EDNRA/FOXC2/PLXND1/ENG/COL4A1/SHH/NRP1/CTNNB1/SRF/ACVR1
BP	GO:0001763	morphogenesis of a branching structure	130	0.481748	1.79403	5.95773e-05	0.00142883	0.00114198	2117	tags=32%, list=16%, signal=27%	SOCS3/HHIP/GLI3/EDNRA/TBX2/HS3ST3A1/FOXC2/BCL11A/PLXND1/TGM2/ENG/GDF7/COL4A1/MMP14/CELSR1/CSF1/ADAMTS16/PRDM1/WNT5A/SHH/RASIP1/SULF1/NRP1/GLI2/FGF1/SNAI2/TNC/TP63/CTNNB1/PTCH1/WNT4/SRF/EXT1/SALL1/ACVR1/PKD2/PLXNA1/GREB1L/MECP2/HS3ST3B1/SEMA3C/PML
BP	GO:0040013	negative regulation of locomotion	228	0.446022	1.79115	3.4058e-06	0.000131548	0.000105138	2336	tags=29%, list=18%, signal=25%	DCN/APOD/THY1/PRKG1/GJA1/EMILIN1/CDH11/IFITM1/MEF2C/CXCL12/IGFBP5/SEMA4B/ENG/ZEB2/KRT16/NAV3/EPHA4/ADAMTS9/ADGRG1/TGFB1/WNT11/WNT5A/GNRH1/SHH/SULF1/NRP1/CCL2/TP53INP1/SERPINE1/TIMP1/PTPRG/DPYSL3/EMILIN2/CD74/FBLN1/APOE/JAG1/WNT4/THBS1/DNAJA4/SPRED1/ANGPT2/ZMYND8/CHRD/STAT3/SRF/PPARG/VCL/LDLRAD4/EPPK1/SEMA4C/NBL1/RBBP4/ROBO1/RABGEF1/MECP2/ATP2B4/PLCB1/EVL/SEMA3C/FLCN/NHERF1/ARHGAP4/MCC/PTGER4/SRGA…
BP	GO:0061333	renal tubule morphogenesis	52	0.548877	1.79028	0.00203264	0.0218352	0.0174516	2315	tags=44%, list=18%, signal=37%	IRX3/GLI3/MEF2C/HS3ST3A1/WNK4/FMN1/COL4A1/ADAMTS16/WNT11/SHH/OSR1/FGF1/CTNNB1/KLHL3/PTCH1/WNT4/HES1/SALL1/PKD2/GREB1L/HS3ST3B1/CTNS/BMP2
BP	GO:0051963	regulation of synapse assembly	58	0.540865	1.78916	0.0018125	0.0204024	0.0163064	1063	tags=28%, list=8%, signal=25%	ICAM5/MEF2C/EFNA5/THBS2/NEGR1/AMIGO2/LRRTM2/EPHB2/SNAP25/LRFN4/FLRT2/WNT5A/WNT7A/PTPN13/PTPRS/CTNNB1
BP	GO:0007044	cell-substrate junction assembly	77	0.520794	1.78858	0.000277068	0.00475101	0.00379719	2262	tags=35%, list=17%, signal=29%	APOD/THY1/CDH11/EFNA5/ITGB3/FMN1/CORO2B/MMP14/ITGA5/COL16A1/FN1/NRP1/SDC4/WNT4/THBS1/FERMT2/LAMA3/VCL/SMAD3/SLC9A1/PLEC/MAP4K4/DAPK3/PIP5K1A/TLN1/WDPCP/ACTN1
BP	GO:0048660	regulation of smooth muscle cell proliferation	93	0.506494	1.788	0.000331589	0.00548379	0.00438286	1924	tags=30%, list=15%, signal=26%	MMP2/APOD/PDGFRB/EFEMP2/PRKG1/GJA1/DDR2/MEF2C/ITGB3/ADAMTS1/IGFBP5/TGFB1/TGFB3/NOTCH3/SOD2/TLR4/PDGFB/IGF1R/CTNNB1/APOE/THBS1/VIP/PPARG/TNFAIP3/FOXP1/IL12A/S1PR1/HBEGF
BP	GO:0007566	embryo implantation	42	0.578941	1.78771	0.00193481	0.0213153	0.017036	952	tags=19%, list=7%, signal=18%	MMP2/GJA1/IL1B/IGFBP7/SYDE1/ITGB3/SPP1/TIMP1
BP	GO:0097028	dendritic cell differentiation	25	0.639778	1.7859	0.00563409	0.0464372	0.0371144	2835	tags=60%, list=21%, signal=47%	TMEM176A/ITGB6/AXL/DHRS2/CEBPB/TMEM176B/GAS6/IRF8/ITGB8/BATF2/LTBR/CSF2/NOTCH2/RELB/RBPJ
BP	GO:0019934	cGMP-mediated signaling	18	0.691352	1.78534	0.00396534	0.0363177	0.0290266	1394	tags=56%, list=11%, signal=50%	IRAG1/PRKG1/PDE3A/KCNC2/PDE11A/GUCY1A2/GUCY2D/GUCY1B1/APOE/THBS1
BP	GO:0071887	leukocyte apoptotic process	86	0.510025	1.78517	0.000156294	0.00306398	0.00244886	1302	tags=27%, list=10%, signal=24%	BIRC7/GLI3/MIAT/MEF2C/CXCL12/ITPKB/BCL3/PLEKHO2/HIF1A/BCL2L11/WNT5A/AXL/NFKBIZ/EFNA1/EBF4/GAS6/CD74/KIFAP3/ADAM17/SLC39A10/CDKN2A/TSC22D3/JAK3
BP	GO:0016331	morphogenesis of embryonic epithelium	110	0.492368	1.78454	0.000134125	0.00273867	0.00218886	2093	tags=28%, list=16%, signal=24%	VANGL2/CTHRC1/IRX3/PTK7/TWIST1/WNT7B/GDF7/HIF1A/CELSR1/TGFB1/WNT5A/SHH/SULF1/OSR1/TP63/CTNNB1/SDC4/PTCH1/WNT4/DVL1/TGFB1I1/CDK20/RARG/SEMA4C/CECR2/LMO4/TEAD2/PLXNB2/MTHFR/PHACTR4/RARA
BP	GO:0072175	epithelial tube formation	100	0.497581	1.78391	0.000150315	0.00295507	0.00236181	2203	tags=29%, list=17%, signal=24%	VANGL2/CTHRC1/IRX3/PTK7/TWIST1/GDF7/HIF1A/CELSR1/TGFB1/WNT5A/OSR1/HESX1/CTNNB1/SDC4/PTCH1/WNT4/DVL1/CDK20/RARG/SEMA4C/CECR2/LMO4/TEAD2/PLXNB2/PIK3CD/MTHFR/PHACTR4/RARA/FZD6
BP	GO:0001502	cartilage condensation	10	0.800196	1.78304	0.00350526	0.0328528	0.0262572	1878	tags=40%, list=14%, signal=34%	MGP/WNT7A/SOX5/BMP1
BP	GO:0048332	mesoderm morphogenesis	47	0.561998	1.78243	0.00140228	0.0169283	0.0135297	1880	tags=36%, list=14%, signal=31%	GJA1/SNAI1/FOXC2/ITGB3/FOXC1/WNT11/WNT5A/HMGA2/ITGA3/ITGB1/TWSG1/SRF/SMAD3/ACVR1/TBX19/POFUT2/EYA2
BP	GO:1905314	semi-lunar valve development	31	0.612651	1.78197	0.0041195	0.0371928	0.0297259	794	tags=26%, list=6%, signal=24%	EMILIN1/CDH11/SNAI1/TWIST1/NFATC1/TGFB1/EFNA1/SNAI2
BP	GO:1900025	negative regulation of substrate adhesion-dependent cell spreading	12	0.767238	1.78126	0.00449496	0.0398101	0.0318178	1392	tags=33%, list=11%, signal=30%	POSTN/EFNA5/FBLN1/SPRY4
BP	GO:0007368	determination of left/right symmetry	88	0.508635	1.7812	0.000418724	0.00657185	0.00525249	1818	tags=25%, list=14%, signal=22%	VANGL2/DAAM2/MEF2C/TBX2/WIF1/ENG/HIF1A/WNT5A/SHH/DNAH11/ODAD4/TBC1D32/IFT140/DVL1/ACVR2B/DYNC2H1/DNAAF3/SRF/CFAP45/SMAD3/ACVR1/PKD2
BP	GO:0034109	homotypic cell-cell adhesion	67	0.525842	1.78038	0.000726135	0.010084	0.00805951	1891	tags=28%, list=14%, signal=24%	PDPN/PRKG1/EMILIN1/PDGFRA/MYL9/ITGB3/FERMT3/TYRO3/FGG/PLPP3/IL6ST/EMILIN2/FGA/FGB/SH2B3/VCL/SERPINE2/STXBP1/FLNA
BP	GO:0009611	response to wounding	390	0.420201	1.77872	1.44618e-08	1.26161e-06	1.00833e-06	1924	tags=28%, list=15%, signal=25%	PDPN/MMP2/PLAT/APOD/DUOX2/PTK7/FAP/PRKG1/EDNRA/EMILIN1/PDGFRA/DDR2/IL1A/NDP/COL5A1/MYL9/CCR1/KRT6A/DUOX1/FOXC2/ITGB3/GLI1/ENTPD1/FKBP10/FERMT3/NFATC1/EPHA4/HIF1A/EPHB2/ITGA5/SERPING1/TGFB1/ITGB6/ST3GAL4/WNT5A/SHH/APOA4/AXL/PLAU/SOD2/TYRO3/ELK3/FN1/NFKBIZ/NRP1/WNT7A/FGG/TLR4/FGF1/ITGB1/CD109/TNC/GAS6/SERPINE1/PTPRS/SPP1/TIMP1/GIPR/KREMEN1/PLPP3/SULF2/DPYSL3/PDGFB/IGF1R/IL6ST/EMILIN2/FGA/MCAM/LRG1/…
BP	GO:0006590	thyroid hormone generation	14	0.731696	1.7785	0.00404234	0.0367816	0.0293973	157	tags=36%, list=1%, signal=35%	DUOXA2/DUOX2/DUOXA1/CTSK/DUOX1
BP	GO:0060325	face morphogenesis	24	0.641314	1.77848	0.00533024	0.044604	0.0356493	532	tags=21%, list=4%, signal=20%	MMP2/COL1A1/CRISPLD2/PDGFRA/TGFB3
BP	GO:0071363	cellular response to growth factor stimulus	490	0.41069	1.7776	1.76835e-09	1.89866e-07	1.51748e-07	1786	tags=25%, list=14%, signal=22%	POSTN/COL1A2/DCN/FSTL1/PDGFRB/COL1A1/ADGRA2/HHIP/PDE3A/EMILIN1/IL1B/PDGFRA/DDR2/NDP/TMEM204/LTBP2/CTSK/MEF2C/JCAD/TBX2/CREB3L1/FBN1/RUNX2/LRRC32/ITGB3/GAS1/PMEPA1/TWIST1/CHST11/LOX/ZEB1/HTRA1/HAS2/CHRDL2/ENG/ZEB2/FOXC1/GDF7/NFATC1/SPRED3/HIF1A/ITGA5/TGFB1/TGFB3/COL4A2/SPHK1/ITGB6/FLRT2/WNT5A/SULF1/NFKBIZ/NRP1/WNT7A/GREM2/CCL2/LTBP1/TLR4/ADAMTS7/ITGA3/FGF1/CDKN2B/SNAI2/VEGFB/DKK3/CD109/GAS6/SNX25/…
BP	GO:0030168	platelet activation	86	0.507819	1.77745	0.000178102	0.00340244	0.00271936	1955	tags=33%, list=15%, signal=28%	PDPN/PRKG1/EMILIN1/PDGFRA/MYL9/ITGB3/FERMT3/AXL/TYRO3/FGG/TLR4/PDGFB/IL6ST/EMILIN2/FGA/VAV1/FGB/APOE/SRF/SH2B3/VCL/BLOC1S3/SERPINE2/STXBP1/CD40/ADRA2C/FLNA/PLSCR1
BP	GO:0003407	neural retina development	40	0.577462	1.77251	0.0033664	0.0319647	0.0255475	1548	tags=30%, list=12%, signal=27%	THY1/NDP/DIO3/FAT3/PRDM1/LARGE1/CASP2/GDF11/SMARCD3/HCN1/HES1/STAT3
BP	GO:0048659	smooth muscle cell proliferation	97	0.498364	1.77227	0.000323163	0.00542153	0.0043331	1924	tags=29%, list=15%, signal=25%	MMP2/APOD/PDGFRB/EFEMP2/PRKG1/GJA1/DDR2/MEF2C/ITGB3/ADAMTS1/IGFBP5/TGFB1/TGFB3/NOTCH3/SOD2/TLR4/PDGFB/IGF1R/CTNNB1/APOE/THBS1/VIP/PPARG/TNFAIP3/FOXP1/IL12A/S1PR1/HBEGF
BP	GO:0060972	left/right pattern formation	94	0.502626	1.77101	0.000132063	0.00271879	0.00217296	1818	tags=24%, list=14%, signal=21%	VANGL2/DAAM2/SNAI1/MEF2C/TBX2/WIF1/ENG/HIF1A/WNT5A/SHH/DNAH11/ODAD4/TBC1D32/IFT140/DVL1/ACVR2B/DYNC2H1/DNAAF3/SRF/CFAP45/SMAD3/ACVR1/PKD2
BP	GO:0007389	pattern specification process	275	0.432696	1.77051	6.57478e-07	3.23137e-05	2.58264e-05	1878	tags=26%, list=14%, signal=23%	VANGL2/IRX3/DAAM2/HHIP/GLI3/SNAI1/MEF2C/TBX2/WIF1/FOXC2/CHSY1/DZIP1L/CXXC4/MDFI/ZEB1/GLI1/BASP1/WNT7B/HOXB2/ENG/FOXC1/HIF1A/ADGRG1/WNT11/WNT5A/SHH/MEIS3/DNAH11/LRP4/NRP1/GLI2/OSR1/WNT7A/GREM2/FGF1/ODAD4/TP63/CTNNB1/CDON/GDF11/NRP2/TGFBR1/EGR2/SMARCD3/TBC1D32/PAX6/IFT140/CELSR2/PTCH1/DVL1/ACVR2B/HES1/DYNC2H1/CHRD/RNF111/DNAAF3/CDK20/SRF/EXT1/INTU/MAFB/RARG/CFAP45/SMAD3/ACVR1/NBL1/PBX3/PKD2/BHLHE40…
BP	GO:0060323	head morphogenesis	29	0.611442	1.76906	0.00420679	0.0378828	0.0302775	532	tags=17%, list=4%, signal=17%	MMP2/COL1A1/CRISPLD2/PDGFRA/TGFB3
BP	GO:0035456	response to interferon-beta	24	0.636329	1.76466	0.00580403	0.0472102	0.0377322	2055	tags=42%, list=16%, signal=35%	IFI16/IFITM1/IFITM2/IFITM3/XAF1/SHFL/IRF1/IKBKE/PLSCR1/NDUFA13
BP	GO:0061564	axon development	313	0.425823	1.76453	3.71266e-07	2.02427e-05	1.61788e-05	2102	tags=30%, list=16%, signal=26%	MMP2/LAMA2/APOD/PTK7/THY1/PRKG1/GLI3/EDNRA/NDP/CDH11/EFNA5/CXCL12/DRAXIN/KIF5A/PLXND1/SEMA4B/TSPAN2/POU4F1/GDF7/EPHA4/EPHB2/PLXNC1/SNAP25/NOTCH3/FLRT2/WNT5A/ROBO3/MAP1A/SHH/KLF7/APOA4/LRP4/FN1/NRP1/GLI2/EFNA1/WNT7A/ETV1/ITGB1/TNC/EFNA3/PTPRS/SPP1/KREMEN1/IGF1R/CDH2/ULK2/RTN4RL1/LLGL1/MAPK8IP3/NRP2/ZFYVE27/NUMBL/ADAM17/EGR2/EMB/PAX6/NPR2/B3GNT2/NREP/ULK1/ARHGEF40/APOE/VASH2/PTCH1/DVL1/SMURF1/C12or…
BP	GO:0030500	regulation of bone mineralization	49	0.550272	1.76397	0.00195494	0.0213655	0.0170761	1835	tags=29%, list=14%, signal=25%	MGP/SRGN/DDR2/CCR1/MEF2C/TWIST1/HIF1A/OSR1/LTBP3/WNT4/ACVR2B/SMAD3/ACVR1/S1PR1
BP	GO:0120039	plasma membrane bounded cell projection morphogenesis	413	0.414272	1.7625	3.29626e-08	2.52798e-06	2.02046e-06	2111	tags=28%, list=16%, signal=24%	PDPN/POSTN/SYT1/LAMA2/PTK7/THY1/GAS7/PRKG1/GLI3/EDNRA/NDP/CDH11/ZNF365/EFNA5/CXCL12/DRAXIN/BCL11A/KIF5A/DLG4/IGF2BP1/PREX2/PLXND1/WNT7B/SEMA4B/POU4F1/GDF7/TANC2/EPHA4/EPHB2/PLXNC1/SNAP25/NOTCH3/KNDC1/FLRT2/ITGA1/WNT5A/ROBO3/MAP1A/SHH/KLF7/LRP4/FN1/NRP1/GLI2/EFNA1/WNT7A/ETV1/ITGB1/ITPKA/EFNA3/PTPRS/SPP1/LRP8/IGF1R/CTNNB1/CDH2/ULK2/LLGL1/NRP2/ZFYVE27/NUMBL/ADAM17/EGR2/EMB/PAX6/NPR2/PLEKHO1/B3GNT2/C…
BP	GO:0048008	platelet-derived growth factor receptor signaling pathway	49	0.54965	1.76197	0.00199365	0.0215456	0.0172201	1411	tags=22%, list=11%, signal=20%	PLAT/APOD/PDGFRB/PDGFRA/ITGB3/LOX/CSPG4/NRP1/PDGFB/F3/CBL
MF	GO:0019956	chemokine binding	15	0.71888	1.76167	0.00422473	0.0379953	0.0303674	1426	tags=47%, list=11%, signal=42%	PDPN/CCR1/ACKR2/ITGB3/ITGB1/ITGAV/A2M
BP	GO:0001754	eye photoreceptor cell differentiation	26	0.625058	1.76131	0.00576192	0.0470321	0.0375899	1548	tags=31%, list=12%, signal=27%	THY1/NDP/DIO3/PRDM1/DZANK1/PAX6/HCN1/STAT3
BP	GO:0033077	T cell differentiation in thymus	60	0.529361	1.76116	0.00166073	0.0189383	0.0151363	1662	tags=28%, list=13%, signal=25%	GLI3/IL1B/IL1A/ITPKB/ZEB1/CARD11/SHH/IL2RG/GLI2/DOCK2/CTNNB1/CD74/ADAM17/ZFP36L1/WNT4/SRF/MAFB
BP	GO:0048048	embryonic eye morphogenesis	23	0.642032	1.76111	0.00611989	0.0488681	0.0390573	613	tags=35%, list=5%, signal=33%	MFAP2/TBX2/FBN1/EFEMP1/TWIST1/ZEB1/MFAP5/WNT5A
BP	GO:0006582	melanin metabolic process	18	0.68121	1.75915	0.00542824	0.0451939	0.0361208	923	tags=33%, list=7%, signal=31%	TYRP1/MC1R/ZEB2/TRPC1/WNT5A/CDH3
BP	GO:0110011	regulation of basement membrane organization	10	0.789198	1.75853	0.00535125	0.0447262	0.0357469	578	tags=30%, list=4%, signal=29%	LAMA2/PHLDB1/NID1
BP	GO:0050931	pigment cell differentiation	27	0.618178	1.75695	0.003642	0.033755	0.0269784	680	tags=22%, list=5%, signal=21%	TYRP1/GLI3/MEF2C/ZEB2/ADAMTS9/SOD2
BP	GO:0003170	heart valve development	50	0.544984	1.75677	0.0023708	0.0245487	0.0196203	794	tags=22%, list=6%, signal=21%	EMILIN1/CDH11/SNAI1/MEF2C/TWIST1/NFATC1/ADAMTS9/TGFB1/PRDM1/EFNA1/SNAI2
BP	GO:0061138	morphogenesis of a branching epithelium	122	0.475629	1.75652	0.000192565	0.0036322	0.002903	2117	tags=32%, list=16%, signal=27%	SOCS3/HHIP/GLI3/EDNRA/TBX2/HS3ST3A1/FOXC2/PLXND1/TGM2/ENG/GDF7/COL4A1/MMP14/CELSR1/CSF1/ADAMTS16/WNT5A/SHH/RASIP1/SULF1/NRP1/GLI2/FGF1/SNAI2/TNC/TP63/CTNNB1/PTCH1/WNT4/SRF/EXT1/SALL1/ACVR1/PKD2/PLXNA1/GREB1L/HS3ST3B1/SEMA3C/PML
BP	GO:0060562	epithelial tube morphogenesis	227	0.436635	1.75553	4.93561e-06	0.000184201	0.000147221	2315	tags=30%, list=18%, signal=26%	VANGL2/CTHRC1/IRX3/PTK7/HHIP/GLI3/EDNRA/MEF2C/TBX2/HS3ST3A1/FOXC2/TWIST1/WNK4/PLXND1/FMN1/ENG/GDF7/EPHA4/HIF1A/COL4A1/MMP14/CELSR1/TGFB1/CSF1/ADAMTS16/WNT11/WNT5A/SHH/RASIP1/NRP1/GLI2/OSR1/FGF1/HESX1/TNC/CTNNB1/SDC4/KLHL3/PTCH1/WNT4/DVL1/HES1/CDK20/SRF/EXT1/SALL1/RARG/SEMA4C/EFNB2/SMAD3/ACVR1/FOXP1/CECR2/PKD2/GREB1L/LMO4/TEAD2/PLXNB2/PIK3CD/MTHFR/HS3ST3B1/PHACTR4/RARA/PML/FZD6/BBS5/CTNS/PODXL/BMP2
BP	GO:0048681	negative regulation of axon regeneration	10	0.787678	1.75514	0.00573622	0.0468772	0.0374661	1126	tags=50%, list=9%, signal=46%	EPHA4/PTPRS/SPP1/KREMEN1/RTN4RL1
BP	GO:0032330	regulation of chondrocyte differentiation	34	0.587698	1.75488	0.00509848	0.0434419	0.0347205	1753	tags=44%, list=13%, signal=38%	GLI3/RUNX2/MBOAT2/EFEMP1/ADAMTS7/SNAI2/CTNNB1/TGFBR1/MAF/SOX5/LTBP3/LOXL2/RARG/SMAD3/TRPS1
BP	GO:0048066	developmental pigmentation	37	0.576158	1.75471	0.00469852	0.04104	0.0328008	680	tags=22%, list=5%, signal=21%	TYRP1/GLI3/EDNRA/MEF2C/ZEB2/ADAMTS9/BCL2L11/SOD2
BP	GO:0032743	positive regulation of interleukin-2 production	20	0.658276	1.75047	0.00515439	0.043709	0.034934	838	tags=30%, list=6%, signal=28%	IL1B/IL1A/CARD11/PDE4D/TRAF2/RUNX1
BP	GO:0007160	cell-matrix adhesion	168	0.451583	1.74933	4.93477e-05	0.00120419	0.000962434	1786	tags=30%, list=14%, signal=27%	POSTN/APOD/THY1/EFEMP2/EMILIN1/ITGBL1/CDH11/ITGAL/FBLN5/EFNA5/NID2/ITGB3/FMN1/CORO2B/ACER2/FERMT3/MMP14/ADAMTS9/ITGA5/COL16A1/CSF1/ITGB6/BCL2L11/NID1/ITGA1/PLAU/ITGA10/FN1/NRP1/FGG/ITGA3/ITGB1/SERPINE1/FGA/CTNNB1/LYPD3/RIN2/SDC4/FGB/CDKN2A/ITGAV/JAG1/WNT4/THBS1/FERMT2/SRF/VCL/ITGB8/SMAD3/SLC9A1/FERMT1
BP	GO:0021532	neural tube patterning	32	0.594995	1.74815	0.00549116	0.045514	0.0363766	1545	tags=28%, list=12%, signal=25%	GLI3/DZIP1L/SHH/TBC1D32/PAX6/IFT140/PTCH1/HES1/CDK20
BP	GO:0030324	lung development	142	0.462968	1.74716	0.000123931	0.00261303	0.00208844	880	tags=20%, list=7%, signal=19%	PDPN/PTK7/CHI3L1/HOPX/HHIP/CRISPLD2/GLI3/PDGFRA/TBX2/IGFBP5/LOX/ADAMTS2/GLI1/WNT7B/MMP14/CELSR1/ABCA12/TGFB3/ITGB6/WNT11/WNT5A/SHH/GLI2/FOSL2/ITGA3/FGF1/ODAD4/TNC/RCN3
BP	GO:0010171	body morphogenesis	40	0.569089	1.74681	0.00423376	0.0380275	0.0303931	745	tags=18%, list=6%, signal=17%	MMP2/COL1A1/CRISPLD2/PDGFRA/TGFB3/PHLDB1/GREM2
CC	GO:0030027	lamellipodium	167	0.45162	1.74565	6.41387e-05	0.00151224	0.00120864	2467	tags=31%, list=19%, signal=26%	PDPN/ANTXR1/FAP/ITGB3/PDLIM4/IGF2BP1/PLXND1/PLEKHG5/ARHGAP31/RAC2/CSPG4/SNAP25/ARAP3/NHS/PTPN13/ITGB1/DPYSL3/CTNNB1/CDH2/PPP1R9B/ITGAV/FERMT2/TUBB3/APBB1/ABLIM3/FSCN1/PXN/SLC9A1/FGD5/PLEKHH2/PKD2/MYO10/RUFY3/MYO9B/DOCK8/PIP5K1A/EVL/AVIL/FGD1/PHACTR4/STX2/MCC/CCDC88A/FLOT2/PODXL/SRGAP2/CTNND1/KLHL2/PARVA/INPPL1/PIEZO1/ABI2
BP	GO:0034446	substrate adhesion-dependent cell spreading	86	0.498365	1.74436	0.000289781	0.00493265	0.00394237	1450	tags=26%, list=11%, signal=23%	PDPN/POSTN/ANTXR1/PREX1/EFNA5/ITGB3/HAS2/FERMT3/AXL/TYRO3/FN1/NRP1/EFNA1/FGG/LIMS2/FGA/FGB/ITGAV/CDC42/FBLN1/SPRY4/FERMT2
MF	GO:0005126	cytokine receptor binding	145	0.462219	1.74379	8.42736e-05	0.00186122	0.00148756	1760	tags=34%, list=13%, signal=30%	PXDN/CRLF1/IL1B/IL1A/CTF1/EFNA5/CXCL12/ITGB3/TNFSF14/TRAF5/TLR5/OSMR/ENG/IL7/CXCL14/ITGA5/TGFB1/CSF1/TGFB3/SOCS2/CXCL1/CXCL2/LIFR/CCL2/TRAF2/VEGFB/PF4V1/IL1RN/MSMP/IL11/IL6ST/LRG1/TGFBR1/ADAM17/CKLF/JAK3/SMURF1/SPRED1/FERMT2/CCL20/CLCF1/CXCL8/PPBP/CXCL6/SH2B3/ERAP1/TNFSF15/SMAD3/IL12A/CADM4
BP	GO:0048858	cell projection morphogenesis	417	0.409096	1.74288	4.58762e-08	3.37021e-06	2.69361e-06	2111	tags=27%, list=16%, signal=24%	PDPN/POSTN/SYT1/LAMA2/PTK7/THY1/GAS7/PRKG1/GLI3/EDNRA/NDP/CDH11/ZNF365/EFNA5/CXCL12/DRAXIN/BCL11A/KIF5A/DLG4/IGF2BP1/PREX2/PLXND1/WNT7B/SEMA4B/POU4F1/GDF7/TANC2/EPHA4/EPHB2/PLXNC1/SNAP25/NOTCH3/KNDC1/FLRT2/ITGA1/WNT5A/ROBO3/MAP1A/SHH/KLF7/LRP4/FN1/NRP1/GLI2/EFNA1/WNT7A/ETV1/ITGB1/ITPKA/EFNA3/PTPRS/SPP1/LRP8/IGF1R/CTNNB1/CDH2/ULK2/LLGL1/NRP2/ZFYVE27/NUMBL/ADAM17/EGR2/EMB/PAX6/NPR2/PLEKHO1/B3GNT2/C…
BP	GO:0061512	protein localization to cilium	57	0.527544	1.74242	0.00245303	0.025176	0.0201216	2426	tags=32%, list=18%, signal=26%	DZIP1L/SNX10/TCTN2/FSIP2/BBS1/DNAH11/DZIP1/ODAD4/CROCC/TBC1D32/IFT140/DYNC2H1/CDK20/BBS9/IFT56/CCDC88A/CSNK1D/IFT80
BP	GO:0071277	cellular response to calcium ion	48	0.547699	1.74173	0.00240093	0.0247505	0.0197816	2096	tags=33%, list=16%, signal=28%	SYT1/MEF2C/ITPKB/CPNE7/ALOX5AP/JUNB/WNT5A/SYT12/ITPKA/FOS/ITPKC/FOSB/MEF2A/PKD2/IQGAP1/SYT11
CC	GO:0034703	cation channel complex	76	0.507529	1.74135	0.000472619	0.00724159	0.00578777	1818	tags=33%, list=14%, signal=29%	SCN4B/KCNN1/KCNJ6/CACNB1/KCNC2/STAC3/MCUB/CACHD1/KCNA7/KCNE5/CACNA1A/KCNN4/TRPC1/KCND3/KCNJ14/PDE4D/KCNMB4/SCNN1A/KCNC1/HCN1/PTPA/TRPC5/KCNS3/MICU1/PKD2
BP	GO:0048812	neuron projection morphogenesis	398	0.409373	1.73969	2.80804e-07	1.60634e-05	1.28385e-05	2111	tags=28%, list=16%, signal=24%	POSTN/SYT1/LAMA2/PTK7/THY1/GAS7/PRKG1/GLI3/EDNRA/NDP/CDH11/ZNF365/EFNA5/CXCL12/DRAXIN/BCL11A/KIF5A/DLG4/IGF2BP1/PREX2/PLXND1/WNT7B/SEMA4B/POU4F1/GDF7/TANC2/EPHA4/EPHB2/PLXNC1/SNAP25/NOTCH3/KNDC1/FLRT2/ITGA1/WNT5A/ROBO3/MAP1A/SHH/KLF7/LRP4/FN1/NRP1/GLI2/EFNA1/WNT7A/ETV1/ITGB1/ITPKA/EFNA3/PTPRS/SPP1/LRP8/IGF1R/CTNNB1/CDH2/ULK2/LLGL1/NRP2/ZFYVE27/NUMBL/ADAM17/EGR2/EMB/PAX6/NPR2/B3GNT2/CDC42/ULK1/ARH…
BP	GO:0010310	regulation of hydrogen peroxide metabolic process	15	0.709877	1.7396	0.00517231	0.0438077	0.0350128	680	tags=33%, list=5%, signal=32%	DUOXA2/DUOXA1/HP/RAC2/SOD2
BP	GO:2000352	negative regulation of endothelial cell apoptotic process	20	0.654098	1.73936	0.005918	0.0477476	0.0381618	2596	tags=65%, list=20%, signal=52%	ITGB3/ICAM1/ANGPTL4/FGG/GAS6/SERPINE1/FGA/FGB/TNFAIP3/SCG2/ANGPT1/TNIP2/ABL1
CC	GO:0005925	focal adhesion	353	0.418065	1.73911	9.12664e-08	6.30642e-06	5.04034e-06	2590	tags=29%, list=20%, signal=24%	PTK7/THY1/FAP/PDGFRB/GJA1/SCARF2/ITGBL1/DDR2/ARHGAP22/FLNC/LAYN/ITGB3/ICAM1/MRC2/TGM2/CORO2B/ENG/ARHGAP31/MMP14/ITGA5/RAC2/CSPG4/ATP6V0C/ITGB6/RPS29/FLRT2/ITGA1/NHS/PLAU/NRP1/RPL37A/ITGA3/RPL38/ITGB1/TNC/LIMS2/RPL31/MCAM/TNS1/CTNNB1/ABCB4/CDH2/TNS3/SDC4/ADAM17/ARPC1B/ITGAV/CDC42/FHL1/SPRY4/CBL/TGFB1I1/RPLP2/FERMT2/DCTN4/MSN/RPL23/SVIL/VCL/EFNB2/ITGB8/PDLIM7/PXN/SLC9A1/FERMT1/PLEC/GRB7/FLNA/FHL3/P…
BP	GO:0032637	interleukin-8 production	54	0.531441	1.73719	0.00338724	0.0321189	0.0256707	1548	tags=28%, list=12%, signal=25%	CHI3L1/IL1B/AFAP1L2/TLR5/NOD1/LBP/BCL3/SSC5D/WNT5A/TLR4/CRP/SERPINE1/CD74/F3/STAT3
BP	GO:0048667	cell morphogenesis involved in neuron differentiation	363	0.413007	1.73715	4.65702e-07	2.40488e-05	1.92207e-05	2179	tags=29%, list=16%, signal=25%	LAMA2/PTK7/THY1/PRKG1/GLI3/EDNRA/NDP/CDH11/MEF2C/ZNF365/EFNA5/CXCL12/DRAXIN/KIF5A/DLG4/IGF2BP1/PREX2/PLXND1/SEMA4B/POU4F1/GDF7/TANC2/EPHA4/EPHB2/PLXNC1/SNAP25/NOTCH3/KNDC1/BBS1/FLRT2/WNT5A/ROBO3/MAP1A/SHH/KLF7/LRP4/FN1/NRP1/GLI2/EFNA1/WNT7A/ETV1/ITGB1/ITPKA/WHRN/EFNA3/PTPRS/SPP1/LRP8/IGF1R/CDH2/ULK2/LLGL1/NRP2/ZFYVE27/NUMBL/ADAM17/EGR2/EMB/PAX6/NPR2/B3GNT2/CDC42/ULK1/ARHGEF40/APOE/CELSR2/SARM1/LH…
BP	GO:0060563	neuroepithelial cell differentiation	20	0.652695	1.73563	0.00599436	0.0481591	0.0384906	3213	tags=65%, list=24%, signal=49%	TGFB1/WNT11/CEBPB/SERPINE1/CDH2/JAG1/WNT4/HES1/BMP2/ABL1/MAP1B/NOTCH1/SOX4
BP	GO:1905521	regulation of macrophage migration	20	0.652654	1.73552	0.00599436	0.0481591	0.0384906	1394	tags=25%, list=11%, signal=22%	EMILIN1/MMP14/CSF1/MTUS1/THBS1
BP	GO:0001708	cell fate specification	56	0.525612	1.73487	0.00258586	0.0262689	0.0209951	1958	tags=36%, list=15%, signal=31%	GLI3/MIAT/TBX2/POU4F1/CHD3/WNT11/WNT5A/SHH/NRP1/GLI2/ITGB1/CTNNB1/CDON/PAX6/PTCH1/TBX19/RBBP4/EYA2/LMO4/MBD3
BP	GO:0045669	positive regulation of osteoblast differentiation	46	0.550619	1.7345	0.00248427	0.0254219	0.0203182	1744	tags=39%, list=13%, signal=34%	CTHRC1/GLI3/DDR2/IFITM1/MEF2C/RUNX2/WNT7B/CEBPB/CEBPD/TP63/IL6ST/CTNNB1/JAG1/WNT4/ACVR2B/FERMT2/ACVR1/WWTR1
BP	GO:0048678	response to axon injury	59	0.521368	1.73396	0.00276787	0.0277804	0.0222032	1359	tags=31%, list=10%, signal=27%	MMP2/APOD/NDP/EPHA4/APOA4/AXL/SOD2/TNC/PTPRS/SPP1/GIPR/KREMEN1/DPYSL3/IGF1R/RTN4RL1/MAPK8IP3/NREP/SARM1
BP	GO:0003229	ventricular cardiac muscle tissue development	39	0.563817	1.73342	0.00353466	0.0330233	0.0263935	493	tags=23%, list=4%, signal=22%	IRX3/HOPX/EDNRA/FOXC2/ENG/POU4F1/FOXC1/ADAMTS9/TGFB1
CC	GO:0098685	Schaffer collateral - CA1 synapse	58	0.523974	1.73329	0.00341162	0.0322188	0.0257505	1063	tags=22%, list=8%, signal=21%	PLAT/SRGN/SYP/CDH11/GRM5/LRRTM2/EPHA4/WNT5A/WNT7A/ITGB1/PTPRS/LRRC4/CTNNB1
BP	GO:0051145	smooth muscle cell differentiation	50	0.537603	1.73297	0.00298758	0.029408	0.0235041	1702	tags=36%, list=13%, signal=31%	EFEMP2/EDNRA/TMEM204/MEF2C/TBX2/ZEB1/ENG/NFATC1/SHH/SOD2/PDGFB/CTNNB1/SMARCD3/WNT4/MRTFA/HES1/SRF/ACVR1
BP	GO:0032757	positive regulation of interleukin-8 production	40	0.564532	1.73282	0.00478769	0.0416625	0.0332983	1548	tags=30%, list=12%, signal=27%	CHI3L1/IL1B/AFAP1L2/TLR5/NOD1/LBP/WNT5A/TLR4/SERPINE1/CD74/F3/STAT3
BP	GO:0048339	paraxial mesoderm development	15	0.705371	1.72856	0.00580403	0.0472102	0.0377322	1921	tags=40%, list=15%, signal=34%	FOXC2/FOXC1/WNT11/WNT5A/SMAD3/TEAD2
BP	GO:1901201	regulation of extracellular matrix assembly	15	0.705356	1.72853	0.00580403	0.0472102	0.0377322	1696	tags=47%, list=13%, signal=41%	ANTXR1/EMILIN1/HAS2/TGFB1/PHLDB1/TGFBR1/SMAD3
BP	GO:0030323	respiratory tube development	146	0.457857	1.72681	0.000109608	0.0023393	0.00186966	880	tags=20%, list=7%, signal=19%	PDPN/PTK7/CHI3L1/HOPX/HHIP/CRISPLD2/GLI3/PDGFRA/TBX2/IGFBP5/LOX/ADAMTS2/GLI1/WNT7B/MMP14/CELSR1/ABCA12/TGFB3/ITGB6/WNT11/WNT5A/SHH/GLI2/FOSL2/ITGA3/FGF1/ODAD4/TNC/RCN3
BP	GO:0045785	positive regulation of cell adhesion	312	0.416369	1.72346	1.79373e-06	7.82402e-05	6.25326e-05	1456	tags=23%, list=11%, signal=21%	PDPN/COL8A1/LAMA2/THY1/SOCS1/EFEMP2/GLI3/EMILIN1/IL1B/IL1A/PREX1/CXCL12/FOXC2/ITGB3/TNFSF14/CCDC80/ITPKB/IGF2/FMN1/TGM2/ADAM19/HAS2/IL7/EPHA4/CARD11/ITGA5/ADGRG1/COL16A1/CSF1/KLHL25/NID1/ST3GAL4/WNT5A/SHH/IL2RG/FN1/NFKBIZ/NRP1/GLI2/FGG/CCL2/ITGA3/ETS1/ABI3BP/RUNX1/LIMS2/MAP3K8/PLPP3/LGALS1/IL4R/PDGFB/IL6ST/EMILIN2/FGA/CD74/SLC7A1/VAV1/RIN2/SDC4/KIFAP3/CD276/SMARCD3/FGB/ITGAV/FSTL3/CDC42/WNT4/CYTH…
BP	GO:0060560	developmental growth involved in morphogenesis	166	0.445084	1.72338	0.000131273	0.00271856	0.00217278	2102	tags=30%, list=16%, signal=26%	POSTN/SYT1/PTK7/PRKG1/EDNRA/TBX2/EFNA5/CXCL12/DRAXIN/BCL11A/FMN1/WNT7B/SEMA4B/CSF1/WNT11/WNT5A/SHH/FN1/NRP1/FGF1/ITGB1/TNC/PTPRS/SPP1/CTNNB1/ULK2/NRP2/ZFYVE27/NPR2/ULK1/APOE/MUL1/DVL1/SMURF1/TRPC5/SRF/EXT1/IST1/VCL/SALL1/RARG/SEMA4C/PLXNA1/S1PR1/RUFY3/MECP2/FLRT3/SEMA3C/IQGAP1/NGF
BP	GO:0072009	nephron epithelium development	77	0.501621	1.72273	0.000673087	0.00950906	0.00760002	2315	tags=43%, list=18%, signal=36%	IRX3/GLI3/EDNRA/MEF2C/HS3ST3A1/FOXC2/WNK4/BASP1/FMN1/WNT7B/FOXC1/ADAMTS16/WNT11/SHH/PECAM1/OSR1/FGF1/CTNNB1/KLHL3/JAG1/PTCH1/WNT4/HES1/EXT1/SALL1/WWTR1/PKD2/GREB1L/HS3ST3B1/IQGAP1/CTNS/PODXL/BMP2
BP	GO:0022612	gland morphogenesis	91	0.4909	1.72224	0.000296787	0.0050152	0.00400835	1705	tags=34%, list=13%, signal=30%	MMP2/GLI3/TBX2/IGFBP5/GLI1/PLXND1/TGM2/GDF7/TGFB1/CSF1/TGFB3/WNT5A/SHH/SULF1/NRP1/FGF1/CEBPB/SNAI2/TNC/LIMS2/SULF2/TP63/PLAG1/PAX6/PTCH1/WNT4/TWSG1/MSN/TNFAIP3/RARG/CRIP1
BP	GO:0032989	cellular component morphogenesis	499	0.396438	1.72063	1.10937e-08	9.92605e-07	7.9333e-07	2111	tags=26%, list=16%, signal=23%	PDPN/POSTN/SYT1/LAMA2/PTK7/THY1/PDGFRB/GAS7/PRKG1/GLI3/EDNRA/PDGFRA/NDP/CDH11/MYL9/ZNF365/EFNA5/FLNC/CXCL12/DRAXIN/BCL11A/KIF5A/DLG4/IGF2BP1/PREX2/PLXND1/WNT7B/FHOD3/SEMA4B/POU4F1/GDF7/TANC2/EPHA4/TNNT1/EPHB2/PLXNC1/SNAP25/NOTCH3/PHLDB1/KNDC1/FLRT2/ITGA1/WNT5A/ROBO3/MAP1A/SHH/KLF7/LRP4/FN1/NRP1/GLI2/EFNA1/WNT7A/ETV1/ITGB1/ITPKA/MFSD14A/EFNA3/PMP22/PTPRS/SPP1/ANKRD23/LRP8/IGF1R/CTNNB1/CDH2/ULK2/LL…
BP	GO:0048661	positive regulation of smooth muscle cell proliferation	58	0.519768	1.71937	0.00391275	0.0358832	0.0286793	1027	tags=21%, list=8%, signal=19%	MMP2/PDGFRB/GJA1/DDR2/ITGB3/ADAMTS1/IGFBP5/TGFB1/NOTCH3/TLR4/PDGFB/IGF1R
BP	GO:0061035	regulation of cartilage development	48	0.540567	1.71905	0.00310363	0.0300837	0.0240441	2452	tags=48%, list=19%, signal=39%	GLI3/CTSK/RUNX2/MBOAT2/EFEMP1/WNT11/WNT5A/ADAMTS7/SNAI2/CTNNB1/TGFBR1/MAF/SOX5/LTBP3/LOXL2/RARG/SMAD3/TRPS1/BMP1/RARA/BMP2/BMPR2/ZNF219
BP	GO:0051893	regulation of focal adhesion assembly	49	0.536025	1.7183	0.00307755	0.0299557	0.0239418	2135	tags=37%, list=16%, signal=31%	APOD/THY1/EFNA5/FMN1/MMP14/COL16A1/NRP1/SDC4/WNT4/THBS1/FERMT2/VCL/SMAD3/SLC9A1/MAP4K4/DAPK3/TLN1/WDPCP
BP	GO:0090109	regulation of cell-substrate junction assembly	49	0.536025	1.7183	0.00307755	0.0299557	0.0239418	2135	tags=37%, list=16%, signal=31%	APOD/THY1/EFNA5/FMN1/MMP14/COL16A1/NRP1/SDC4/WNT4/THBS1/FERMT2/VCL/SMAD3/SLC9A1/MAP4K4/DAPK3/TLN1/WDPCP
BP	GO:0060078	regulation of postsynaptic membrane potential	48	0.539364	1.71522	0.00318171	0.0305856	0.0244452	1963	tags=35%, list=15%, signal=30%	MEF2C/GRM5/SLC29A1/DLG4/STX1A/RGS4/SLC1A7/WNT7A/CHRNE/GRIN2B/HCN1/DMPK/DVL1/ZMYND8/SYNE1/MECP2/MTMR2
MF	GO:0005125	cytokine activity	100	0.478272	1.71469	0.000474047	0.00724159	0.00578777	1766	tags=44%, list=13%, signal=38%	CRLF1/IL1B/IL1A/NDP/CTF1/CXCL12/TNFSF14/WNT7B/CMTM3/IL7/GDF7/CXCL14/TGFB1/CSF1/TGFB3/CXCL1/WNT11/WNT5A/WNT5B/INHBE/CXCL2/ALKAL1/WNT7A/GREM2/CCL2/BMP8A/PF4V1/IL1RN/SPP1/TIMP1/MSMP/IL11/NAMPT/GDF11/CKLF/WNT4/CCL20/CLCF1/CXCL8/PPBP/CXCL6/TNFSF15/IL12A/SCG2
BP	GO:2000027	regulation of animal organ morphogenesis	84	0.491373	1.71427	0.000897582	0.0119092	0.00951828	1405	tags=26%, list=11%, signal=24%	VANGL2/CTHRC1/PTK7/DACT1/RUNX2/PLEKHA4/CELSR1/CSF1/WNT11/WNT5A/SHH/SULF1/WNT7A/FGF1/SNAI2/PRICKLE2/CTNNB1/CDC42/CELSR2/WNT4/DVL1/SMURF1
BP	GO:0034405	response to fluid shear stress	27	0.60296	1.71369	0.00510423	0.0434419	0.0347205	2457	tags=37%, list=19%, signal=30%	MMP2/MEF2C/HAS2/TGFB3/TFPI2/PLEC/PKD2/ABCA1/CSF2/SOCS5
BP	GO:0032990	cell part morphogenesis	436	0.40067	1.71218	3.25198e-07	1.83029e-05	1.46284e-05	2111	tags=27%, list=16%, signal=23%	PDPN/POSTN/SYT1/LAMA2/PTK7/THY1/GAS7/PRKG1/GLI3/EDNRA/NDP/CDH11/ZNF365/EFNA5/CXCL12/DRAXIN/BCL11A/KIF5A/DLG4/IGF2BP1/PREX2/PLXND1/WNT7B/SEMA4B/POU4F1/GDF7/TANC2/EPHA4/EPHB2/PLXNC1/SNAP25/NOTCH3/KNDC1/FLRT2/ITGA1/WNT5A/ROBO3/MAP1A/SHH/KLF7/LRP4/FN1/NRP1/GLI2/EFNA1/WNT7A/ETV1/ITGB1/ITPKA/EFNA3/PTPRS/SPP1/LRP8/IGF1R/CTNNB1/CDH2/ULK2/LLGL1/SLIRP/NRP2/ZFYVE27/NUMBL/ADAM17/EGR2/EMB/PAX6/NPR2/PLEKHO1/B3…
BP	GO:0030282	bone mineralization	76	0.499014	1.71213	0.000699172	0.00973956	0.00778425	747	tags=17%, list=6%, signal=16%	MGP/COL1A2/SRGN/DDR2/CCR1/MEF2C/TWIST1/LOX/SNX10/HIF1A/WNT11/OSR1/FOSL2
BP	GO:0048771	tissue remodeling	117	0.467247	1.71054	0.000328349	0.00545606	0.0043607	1587	tags=32%, list=12%, signal=29%	MMP2/CTHRC1/GJA1/EDNRA/DDR2/IL1A/NDP/CTSK/MEF2C/FOXC2/ITGB3/SIGLEC15/IGFBP5/SNX10/NPR3/IL20RA/IL7/FOXC1/HIF1A/MMP14/RAC2/CSPG4/TGFB1/AXL/FOSL2/LRRK1/RUNX1/SPP1/TIMP1/CTNNB1/NPR2/JAG1/LTBP3/ACVR2B/EXT1/PPARG/EFNA2/NCDN
BP	GO:1902075	cellular response to salt	116	0.46745	1.70861	0.000212538	0.00396606	0.00316983	2096	tags=31%, list=16%, signal=26%	SYT1/COL1A1/MEF2C/SLC13A5/BCL11A/ITPKB/CPNE7/DLG4/TGM2/ALOX5AP/JUNB/WNT5A/SHH/SYT12/ZC3H12A/P2RY2/CIB2/ITPKA/LARGE1/PDGFB/ADCY7/EGR1/FOS/PPP1R9B/ITPKC/FOSB/MEF2A/PLEC/PKD2/NEK7/MECP2/ATP2B4/PLCB1/LYPD1/IQGAP1/SYT11
BP	GO:2000106	regulation of leukocyte apoptotic process	63	0.511339	1.70626	0.00292326	0.0288563	0.0230631	1302	tags=30%, list=10%, signal=27%	BIRC7/MIAT/MEF2C/CXCL12/ITPKB/BCL3/HIF1A/BCL2L11/WNT5A/AXL/EFNA1/GAS6/CD74/KIFAP3/ADAM17/SLC39A10/CDKN2A/TSC22D3/JAK3
BP	GO:0071260	cellular response to mechanical stimulus	58	0.51509	1.7039	0.00499744	0.0428993	0.0342869	2419	tags=36%, list=18%, signal=30%	COL1A1/IL1B/ITGB3/TNFSF14/TLR5/ENG/WNT11/TLR4/IGF1R/SLC2A1/CASP2/SLC38A2/IRF1/TMEM87A/SLC9A1/PLEC/CD40/LTBR/MAPK8/PTGER4/PIEZO1
CC	GO:0005788	endoplasmic reticulum lumen	238	0.421201	1.69994	2.3343e-05	0.000659805	0.000527342	1195	tags=25%, list=9%, signal=23%	AMTN/COL8A1/COL1A2/FSTL1/COL1A1/MXRA8/COL6A2/COL7A1/COL5A1/COL6A3/IGFBP7/CERCAM/COL12A1/SPARCL1/FBN1/GPX8/P4HA3/COL5A2/IGFBP5/WNT7B/FKBP10/CP/COL4A1/COL16A1/SERPING1/VWA1/CSF1/COL4A2/WNT5A/COL4A4/WNT5B/SHH/TSPAN5/COL4A3/APOA4/COL15A1/FN1/WNT7A/FGG/LTBP1/ADAMTS7/COL6A1/P3H2/TNC/IGFBP1/RCN3/GAS6/IGFBP4/COL4A5/SPP1/TIMP1/TXNDC5/LGALS1/PDGFB/FGA/H6PD/CDH2/ARSG/ADAM17
BP	GO:0030166	proteoglycan biosynthetic process	46	0.539625	1.69986	0.0039709	0.036321	0.0290292	2717	tags=50%, list=21%, signal=40%	CHSY3/HS3ST3A1/CHSY1/B3GAT2/CHST11/CHST3/CSGALNACT2/FOXL1/CTNNB1/CHST10/DSE/CHST15/EXT1/SLC2A10/CHST14/HS3ST2/CHST12/HS3ST3B1/CHPF2/BMPR2/B3GALT6/NDST1/CSGALNACT1
BP	GO:0042471	ear morphogenesis	65	0.502732	1.69901	0.0030711	0.0299557	0.0239418	2203	tags=35%, list=17%, signal=30%	CTHRC1/PTK7/EDNRA/PRRX1/TBX2/TWIST1/ZEB1/EPHB2/WNT5A/OSR1/RPL38/WHRN/HESX1/LHFPL5/DVL1/LRIG1/SOBP/MAFB/PDZD7/WDPCP/NHERF1/LRIG3/FZD6
BP	GO:0032623	interleukin-2 production	33	0.575808	1.6982	0.00527324	0.0443419	0.0354398	838	tags=24%, list=6%, signal=23%	IL1B/IL1A/LAG3/NAV3/CARD11/PDE4D/TRAF2/RUNX1
BP	GO:0032663	regulation of interleukin-2 production	33	0.575808	1.6982	0.00527324	0.0443419	0.0354398	838	tags=24%, list=6%, signal=23%	IL1B/IL1A/LAG3/NAV3/CARD11/PDE4D/TRAF2/RUNX1
BP	GO:0016055	Wnt signaling pathway	351	0.407122	1.69645	1.50591e-06	6.73703e-05	5.3845e-05	2426	tags=27%, list=18%, signal=23%	VANGL2/CTHRC1/PTK7/DAAM2/DACT1/COL1A1/ADGRA2/GLI3/EDNRA/NDP/WIF1/DRAXIN/CXXC4/MDFI/GLI1/WNT7B/PORCN/PLEKHA4/ZEB2/CELSR1/TGFB1/TLE3/ATP6V0C/ATP6V1C2/NID1/WNT11/WNT5A/WNT5B/SHH/LRP4/SULF1/WNT7A/ITGA3/SNAI2/LRRK1/DKK3/HESX1/IGFBP1/CDH3/IGFBP4/KREMEN1/PLPP3/SULF2/FOXL1/PRICKLE2/CTNNB1/MBD2/CDH2/TRABD2B/EGR1/AMOTL1/TLE4/TMEM67/CDC42/APOE/CELSR2/WNT4/DVL1/SMURF1/TGFB1I1/FERMT2/EXT1/SALL1/TNFAIP3/RARG/C…
CC	GO:0043197	dendritic spine	101	0.472913	1.69574	0.00105093	0.0135242	0.0108091	2614	tags=34%, list=20%, signal=27%	LPAR1/LAMA2/GRM5/PDLIM4/DLG4/IGF2BP1/DRD1/TANC2/EPHA4/EPHB2/PRRT2/KCND3/ITGB1/ITPKA/LRRC4/PPP1R9B/CDC42/DVL1/ZMYND8/DNM3/ARHGAP33/DNAJB1/SORCS2/SYNE1/MTMR2/SYT11/HOMER1/FBXO2/SRGAP2/CTNND1/ABI2/PSD/KCNC3/ARHGAP44
BP	GO:0001841	neural tube formation	84	0.485876	1.69509	0.00103511	0.0133531	0.0106723	2203	tags=27%, list=17%, signal=23%	VANGL2/CTHRC1/PTK7/TWIST1/GDF7/HIF1A/CELSR1/TGFB1/WNT5A/SDC4/PTCH1/DVL1/CDK20/RARG/SEMA4C/CECR2/LMO4/TEAD2/PLXNB2/MTHFR/PHACTR4/RARA/FZD6
BP	GO:0016358	dendrite development	160	0.441952	1.69331	0.000131091	0.00271856	0.00217278	1645	tags=25%, list=12%, signal=22%	LPAR1/PRKG1/NDP/MEF2C/ZNF365/PREX1/BCL11A/DLG4/IGF2BP1/PREX2/TANC2/EPHA4/EPHB2/FAT3/KNDC1/BBS1/MAP1A/KLF7/LRP4/NRP1/EFNA1/WNT7A/ITGB1/ITPKA/CAMK1D/PTPRS/ZNF212/LRP8/PPP1R9B/CDC42/APOE/CELSR2/SARM1/DVL1/ZMYND8/TRPC5/MAPK6/DNM3/MEF2A/ARHGAP33
BP	GO:0060541	respiratory system development	162	0.439341	1.69254	0.000103127	0.00222825	0.00178091	880	tags=19%, list=7%, signal=18%	PDPN/PTK7/CHI3L1/HOPX/HHIP/CRISPLD2/GLI3/PDGFRA/TBX2/IGFBP5/LOX/ADAMTS2/GLI1/BASP1/WNT7B/MMP14/CELSR1/ABCA12/TGFB3/ITGB6/WNT11/WNT5A/SHH/GLI2/FOSL2/ITGA3/FGF1/ODAD4/HESX1/TNC/RCN3
BP	GO:0035148	tube formation	111	0.466427	1.69242	0.000606474	0.00865559	0.00691789	2093	tags=28%, list=16%, signal=24%	VANGL2/CTHRC1/IRX3/PTK7/TWIST1/TGM2/GDF7/HIF1A/CELSR1/TGFB1/BCL2L11/WNT5A/SHH/OSR1/HESX1/CTNNB1/SDC4/PTCH1/WNT4/DVL1/CDK20/RARG/SEMA4C/CECR2/LMO4/TEAD2/PLXNB2/PIK3CD/MTHFR/PHACTR4/RARA
BP	GO:0198738	cell-cell signaling by wnt	352	0.406275	1.69221	9.3697e-07	4.35941e-05	3.48421e-05	2426	tags=27%, list=18%, signal=23%	VANGL2/CTHRC1/PTK7/DAAM2/DACT1/COL1A1/ADGRA2/GLI3/EDNRA/NDP/WIF1/DRAXIN/CXXC4/MDFI/GLI1/WNT7B/PORCN/PLEKHA4/ZEB2/CELSR1/TGFB1/TLE3/ATP6V0C/ATP6V1C2/NID1/WNT11/WNT5A/WNT5B/SHH/LRP4/SULF1/WNT7A/ITGA3/SNAI2/LRRK1/DKK3/HESX1/IGFBP1/CDH3/IGFBP4/KREMEN1/PLPP3/SULF2/FOXL1/PRICKLE2/CTNNB1/MBD2/CDH2/TRABD2B/EGR1/AMOTL1/TLE4/TMEM67/CDC42/APOE/CELSR2/WNT4/DVL1/SMURF1/TGFB1I1/FERMT2/EXT1/SALL1/TNFAIP3/RARG/C…
MF	GO:0001217	DNA-binding transcription repressor activity	245	0.417476	1.69154	2.00783e-05	0.000586304	0.000468597	3357	tags=44%, list=25%, signal=34%	AEBP1/IRX3/PRRX1/SNAI1/TBX2/CREB3L1/BCL11A/ZBED2/TWIST1/ZEB1/POU4F1/ZEB2/HIF1A/ZNF20/DMBX1/PRDM1/POU6F1/ZNF439/ELK3/FOXS1/CEBPB/SNAI2/NR2F1/HESX1/ZNF491/ZNF764/PEG3/ETV3/ZBED6/PLAGL1/IRF8/PAX6/ZNF555/ETV7/KLF12/ZFP37/ZNF440/ZNF785/HES1/E2F7/ETV6/PPARG/SALL1/SMAD3/FOXP1/ZNF169/ZNF589/TRPS1/GLIS3/ZNF93/ZNF343/IKZF5/BHLHE40/MAFK/ZBTB5/FOXK1/ZBTB49/JDP2/ZNF557/ZNF77/ZBTB33/RARA/MSC/ZBTB6/ZNF749/ZBTB1…
BP	GO:0001822	kidney development	226	0.421483	1.69103	2.98025e-05	0.000812467	0.000649356	1477	tags=27%, list=11%, signal=24%	VANGL2/IRX3/PTK7/CRLF1/PDGFRB/GLI3/EDNRA/PDGFRA/MEF2C/FBN1/HS3ST3A1/FOXC2/ITGB3/ADAMTS1/WNK4/PLXND1/BASP1/FMN1/WNT7B/HAS2/FOXC1/EPHA4/ADAMTS6/MMP17/NOTCH3/BCL2L11/ADAMTS16/PRDM1/NID1/WNT11/WNT5A/COL4A4/SHH/COL4A3/PECAM1/LRP4/SULF1/NRP1/GLI2/OSR1/ITGA3/FGF1/SULF2/PDGFB/CTNNB1/EGR1/GDF11/SDC4/AGTR1/TGFBR1/TBC1D32/KLHL3/JAG1/PTCH1/WNT4/AP2B1/ACVR2B/ANGPT2/HES1/DYNC2H1
BP	GO:0072028	nephron morphogenesis	50	0.523409	1.68722	0.0051524	0.043709	0.034934	2315	tags=42%, list=18%, signal=35%	IRX3/GLI3/HS3ST3A1/WNK4/FMN1/ADAMTS16/WNT11/SHH/OSR1/FGF1/CTNNB1/KLHL3/PTCH1/WNT4/HES1/SALL1/PKD2/GREB1L/HS3ST3B1/CTNS/BMP2
BP	GO:0072088	nephron epithelium morphogenesis	50	0.523409	1.68722	0.0051524	0.043709	0.034934	2315	tags=42%, list=18%, signal=35%	IRX3/GLI3/HS3ST3A1/WNK4/FMN1/ADAMTS16/WNT11/SHH/OSR1/FGF1/CTNNB1/KLHL3/PTCH1/WNT4/HES1/SALL1/PKD2/GREB1L/HS3ST3B1/CTNS/BMP2
BP	GO:0034329	cell junction assembly	282	0.409524	1.68647	6.08752e-06	0.000223604	0.000178714	2417	tags=32%, list=18%, signal=26%	APOD/IRX3/HOPX/THY1/GJA1/IL1B/ICAM5/CDH11/SNAI1/MEF2C/EFNA5/THBS2/NEGR1/ITGB3/AMIGO2/PLXND1/FMN1/DNER/CLDN11/CORO2B/POU4F1/LRRTM2/DRD1/PKP1/MMP14/EPHB2/ITGA5/COL16A1/SNAP25/LRFN4/WNT11/FLRT2/WNT5A/PECAM1/LRP4/FN1/NRP1/WNT7A/ESAM/PTPN13/SNAI2/CDH6/LARGE1/CLDN14/PTPRS/CDH3/LRRC4/PRKCH/GABRB3/CTNNB1/CDH2/SDC4/CDC42/NPHP1/WNT4/THBS1/DVL1/FERMT2/LAMA3/FSCN1/SRF/DNM3/VCL/SMAD3/SLC9A1/IKBKB/PLEC/MYO9A/C…
BP	GO:0072078	nephron tubule morphogenesis	48	0.529769	1.68471	0.0052179	0.0440868	0.0352359	2315	tags=44%, list=18%, signal=36%	IRX3/GLI3/HS3ST3A1/WNK4/FMN1/ADAMTS16/WNT11/SHH/OSR1/FGF1/CTNNB1/KLHL3/PTCH1/WNT4/HES1/SALL1/PKD2/GREB1L/HS3ST3B1/CTNS/BMP2
BP	GO:0060996	dendritic spine development	70	0.49261	1.68292	0.00188086	0.0209781	0.0167666	2326	tags=36%, list=18%, signal=30%	LPAR1/NDP/MEF2C/ZNF365/DLG4/TANC2/EPHA4/EPHB2/EFNA1/WNT7A/ITPKA/PTPRS/LRP8/CDC42/APOE/DVL1/ZMYND8/MAPK6/DNM3/ARHGAP33/MECP2/CAPRIN2/C21orf91/DBN1/SRGAP2
BP	GO:0072073	kidney epithelium development	98	0.471076	1.68138	0.00080294	0.010881	0.00869653	2315	tags=41%, list=18%, signal=34%	IRX3/CRLF1/GLI3/EDNRA/MEF2C/HS3ST3A1/FOXC2/WNK4/BASP1/FMN1/WNT7B/FOXC1/EPHA4/ADAMTS16/WNT11/SHH/PECAM1/OSR1/FGF1/CTNNB1/GDF11/SDC4/KLHL3/JAG1/PTCH1/WNT4/HES1/EXT1/SALL1/EFNB2/SMAD3/WWTR1/PKD2/GREB1L/HS3ST3B1/IQGAP1/RARA/CTNS/PODXL/BMP2
BP	GO:0150115	cell-substrate junction organization	84	0.481707	1.68055	0.00125198	0.0153831	0.0122948	2135	tags=31%, list=16%, signal=26%	APOD/THY1/CDH11/EFNA5/ITGB3/FMN1/CORO2B/MMP14/ITGA5/COL16A1/FN1/NRP1/SDC4/WNT4/THBS1/FERMT2/LAMA3/VCL/SMAD3/SLC9A1/PLEC/MAP4K4/DAPK3/PIP5K1A/TLN1/WDPCP
BP	GO:0043123	positive regulation of canonical NF-kappaB signal transduction	161	0.436278	1.67747	0.000172056	0.00332776	0.00265968	2847	tags=29%, list=22%, signal=23%	LPAR1/PELI2/GJA1/IL1B/IL1A/TRAF5/NOD1/PLEKHG5/CARD11/UBE2V1/TICAM2/TLR4/TRAF2/LGALS1/PELI1/CTNNB1/TIFA/CD74/ALPK1/SLC20A1/MUL1/TRIM68/INAVA/IKBKB/IKBKE/CD40/FBXW11/FLNA/TNFSF10/ZDHHC17/MAP3K3/PLK2/SLC44A2/C18orf32/LTBR/TRIM8/TNIP2/APOL3/TNFRSF19/ABL1/TRIM6/UNC5CL/RIPK1/IRF3/CHUK/DDX21/NEK6
BP	GO:0043542	endothelial cell migration	168	0.432066	1.67372	0.000222494	0.00408629	0.00326592	2021	tags=32%, list=15%, signal=28%	DCN/SPARC/FSTL1/FAP/ADGRA2/MEF2C/JCAD/FOXC2/ITGB3/PLXND1/VSTM4/ZEB2/PLEKHG5/HIF1A/ADAMTS9/TGFB1/WNT5A/ZC3H12A/NRP1/EFNA1/WNT7A/FGF1/SNAI2/ITGB1/ETS1/PLPP3/PDGFB/RIN2/NRP2/TGFBR1/ADAM17/CLN3/APOE/LOXL2/STAT5A/THBS1/DNAJA4/SPRED1/ANGPT2/SRF/PPARG/EFNB2/FOXP1/SCG2/PXN/CD40/ROBO1/MECP2/ATP2B4/EGR3/MAP3K3/PLK2/FUT1/PIK3CD
BP	GO:0001667	ameboidal-type cell migration	329	0.40201	1.67359	1.23567e-05	0.000401105	0.000320579	2210	tags=30%, list=17%, signal=26%	DCN/DAAM2/SPARC/FSTL1/FAP/CD248/ADGRA2/GJA1/EDNRA/DDR2/SNAI1/MEF2C/JCAD/SYDE1/FOXC2/ITGB3/TWIST1/PLXND1/VSTM4/NRTN/SEMA4B/HAS2/ZEB2/KRT16/PLEKHG5/HIF1A/ADAMTS9/TGFB1/WNT11/WNT5A/SHH/FN1/ZC3H12A/NRP1/EFNA1/WNT7A/ITGA3/FGF1/SNAI2/ITGB1/ETS1/PRR5L/TIMP1/PLPP3/PTPRG/PDGFB/TNS1/LRG1/CDH2/RIN2/AMOTL1/SDC4/NRP2/TGFBR1/ADAM17/CLN3/PAX6/CDC42/APOE/LOXL2/STAT5A/THBS1/DNAJA4/SPRED1/ANGPT2/SRF/PPARG/EPPK1/SE…
BP	GO:0034330	cell junction organization	488	0.386142	1.67251	1.56425e-07	1.0299e-05	8.23134e-06	2135	tags=26%, list=16%, signal=23%	APOD/IRX3/PTK7/SRGN/HOPX/THY1/GJA1/IL1B/ICAM5/CDH11/CACNB1/SNAI1/MEF2C/ZNF365/GRM5/SPARCL1/ARHGAP22/EFNA5/THBS2/NEGR1/ITGB3/DLG4/AMIGO2/PLXND1/FMN1/DNER/WNT7B/CLDN11/CORO2B/POU4F1/LRRTM2/DRD1/TANC2/EPHA4/PKP1/COL4A1/MMP14/EPHB2/ITGA5/COL16A1/PLXNC1/TGFB1/SNAP25/TGFB3/LRFN4/WNT11/FLRT2/WNT5A/KIFC3/STK38L/PECAM1/LRP4/FN1/NRP1/EFNA1/WNT7A/ESAM/PTPN13/C1QL1/ITGA3/SNAI2/ITGB1/KIRREL1/ITPKA/WHRN/CDH6/L…
BP	GO:0003143	embryonic heart tube morphogenesis	48	0.525919	1.67247	0.00553175	0.0457418	0.0365587	1921	tags=29%, list=15%, signal=25%	VANGL2/MEF2C/TBX2/ENG/HIF1A/WNT5A/SHH/DVL1/HES1/SRF/SMAD3/ACVR1/PKD2/TEAD2
BP	GO:0060070	canonical Wnt signaling pathway	237	0.414707	1.6722	4.7027e-05	0.00116383	0.000930183	3425	tags=39%, list=26%, signal=30%	CTHRC1/PTK7/DAAM2/DACT1/COL1A1/ADGRA2/GLI3/EDNRA/NDP/DRAXIN/GLI1/WNT7B/PLEKHA4/ZEB2/TGFB1/TLE3/NID1/WNT11/WNT5A/WNT5B/SHH/LRP4/WNT7A/SNAI2/LRRK1/DKK3/HESX1/IGFBP1/CDH3/IGFBP4/KREMEN1/SULF2/CTNNB1/CDH2/EGR1/TLE4/APOE/WNT4/DVL1/EXT1/RARG/CCAR2/SMAD3/WWTR1/FERMT1/TBL1XR1/CSNK1G2/DAPK3/WNT10A/NHERF1/FZD6/MCC/CAPRIN2/RBMS3/NKD1/BMP2/LMBR1L/CTNND1/RNF146/CTDNEP1/CSNK1D/TRPM4/PYGO2/SMURF2/BCL9L/LATS1/CD…
BP	GO:0042060	wound healing	300	0.405059	1.67139	7.38361e-06	0.000256369	0.0002049	1955	tags=29%, list=15%, signal=25%	PDPN/PLAT/DUOX2/PTK7/FAP/PRKG1/EMILIN1/PDGFRA/DDR2/IL1A/COL5A1/MYL9/KRT6A/DUOX1/FOXC2/ITGB3/ENTPD1/FKBP10/FERMT3/NFATC1/HIF1A/EPHB2/ITGA5/SERPING1/TGFB1/ITGB6/ST3GAL4/WNT5A/SHH/AXL/PLAU/TYRO3/ELK3/FN1/WNT7A/FGG/TLR4/FGF1/ITGB1/CD109/GAS6/SERPINE1/TIMP1/PLPP3/PDGFB/IL6ST/EMILIN2/FGA/MCAM/LRG1/VAV1/SDC4/TGFBR1/ADAM17/FGB/NPR2/F3/FBLN1/APOE/HPS4/WNT4/MRTFA/THBS1/FERMT2/SRF/EXT1/PPARG/SH2B3/TFPI2/VCL…
MF	GO:0001227	DNA-binding transcription repressor activity, RNA polymerase II-specific	237	0.414037	1.6695	5.03155e-05	0.00122112	0.000975968	3357	tags=43%, list=25%, signal=33%	AEBP1/IRX3/PRRX1/SNAI1/TBX2/CREB3L1/BCL11A/ZBED2/ZEB1/POU4F1/ZEB2/ZNF20/DMBX1/PRDM1/POU6F1/ZNF439/ELK3/FOXS1/CEBPB/SNAI2/NR2F1/HESX1/ZNF491/ZNF764/PEG3/ETV3/ZBED6/PLAGL1/IRF8/PAX6/ZNF555/ETV7/KLF12/ZFP37/ZNF440/ZNF785/HES1/E2F7/ETV6/PPARG/SALL1/FOXP1/ZNF169/ZNF589/TRPS1/GLIS3/ZNF93/ZNF343/IKZF5/BHLHE40/MAFK/ZBTB5/FOXK1/ZBTB49/JDP2/ZNF557/ZNF77/ZBTB33/MSC/ZBTB6/ZNF749/ZBTB1/ERF/ZBTB10/ZNF224/ZNF17…
BP	GO:0001843	neural tube closure	75	0.487837	1.66943	0.00197151	0.0214317	0.0171291	2203	tags=28%, list=17%, signal=23%	VANGL2/CTHRC1/PTK7/TWIST1/CELSR1/TGFB1/WNT5A/SDC4/PTCH1/DVL1/CDK20/RARG/SEMA4C/CECR2/LMO4/TEAD2/PLXNB2/MTHFR/PHACTR4/RARA/FZD6
BP	GO:0060606	tube closure	75	0.487837	1.66943	0.00197151	0.0214317	0.0171291	2203	tags=28%, list=17%, signal=23%	VANGL2/CTHRC1/PTK7/TWIST1/CELSR1/TGFB1/WNT5A/SDC4/PTCH1/DVL1/CDK20/RARG/SEMA4C/CECR2/LMO4/TEAD2/PLXNB2/MTHFR/PHACTR4/RARA/FZD6
BP	GO:0018212	peptidyl-tyrosine modification	171	0.428713	1.66791	0.000115781	0.00246352	0.00196894	1850	tags=26%, list=14%, signal=23%	CRLF1/PDGFRB/SOCS1/SOCS3/PDGFRA/DDR2/CTF1/GRM5/EFNA5/ITGB3/SPINK1/EFEMP1/DLG4/IGF2/IL7/EPHA4/EPHB2/ITGA5/CSPG4/TGFB1/TPST1/PECAM1/LRP4/NRP1/EFNA1/LRRK1/CLK1/IL11/LRP8/PLPP3/PDGFB/IGF1R/IL6ST/CD74/ADAM17/JAK3/CBL/HES1/CLCF1/TNK2/ACVR1/IL12A/CADM4/DYRK1A/CD40
BP	GO:0060326	cell chemotaxis	169	0.429274	1.66785	7.43592e-05	0.00170148	0.00135989	2021	tags=32%, list=15%, signal=27%	MMP2/LPAR1/PDGFRB/IL1B/PDGFRA/CCR1/ACKR2/PREX1/CXCL12/TNFSF14/LOX/LBP/PLEKHG5/CXCL14/RAC2/CSF1/CXCL1/ITGA1/WNT5A/CXCL2/NRP1/CCL2/FGF1/VEGFB/PF4V1/CAMK1D/GAS6/SERPINE1/MSMP/PDGFB/CD74/VAV1/MTUS1/AGTR1/ADAM17/CKLF/SLC8B1/THBS1/CCL20/CXCL8/PPBP/DOCK4/CXCL6/NBL1/IL12A/SCG2/PLEC/S1PR1/IL17RC/HBEGF/EGR3/RPS19/PIP5K1A/PIK3CD
BP	GO:0001570	vasculogenesis	61	0.499258	1.66613	0.0040239	0.0367096	0.0293397	1694	tags=30%, list=13%, signal=26%	PDGFRB/WNT7B/HAS2/ENG/TGFB1/JUNB/SHH/RASIP1/NRP1/WNT7A/CTNNB1/RIN2/NPR2/ITGAV/ZFP36L1/SPRED1/EGFL7/ITGB8
BP	GO:0072001	renal system development	232	0.414866	1.66578	4.1597e-05	0.00105183	0.000840665	1477	tags=26%, list=11%, signal=24%	VANGL2/IRX3/PTK7/CRLF1/PDGFRB/GLI3/EDNRA/PDGFRA/MEF2C/FBN1/HS3ST3A1/FOXC2/ITGB3/ADAMTS1/WNK4/PLXND1/BASP1/FMN1/WNT7B/HAS2/FOXC1/EPHA4/COL4A1/ADAMTS6/MMP17/NOTCH3/BCL2L11/ADAMTS16/PRDM1/NID1/WNT11/WNT5A/COL4A4/SHH/COL4A3/PECAM1/LRP4/SULF1/NRP1/GLI2/OSR1/ITGA3/FGF1/SULF2/PDGFB/CTNNB1/EGR1/GDF11/SDC4/AGTR1/TGFBR1/TBC1D32/KLHL3/JAG1/PTCH1/WNT4/AP2B1/ACVR2B/ANGPT2/HES1/DYNC2H1
BP	GO:0048041	focal adhesion assembly	67	0.491819	1.66518	0.00285455	0.0284193	0.0227138	2262	tags=33%, list=17%, signal=27%	APOD/THY1/CDH11/EFNA5/FMN1/CORO2B/MMP14/COL16A1/NRP1/SDC4/WNT4/THBS1/FERMT2/VCL/SMAD3/SLC9A1/MAP4K4/DAPK3/PIP5K1A/TLN1/WDPCP/ACTN1
BP	GO:0043410	positive regulation of MAPK cascade	287	0.403383	1.66107	1.46961e-05	0.000466199	0.000372605	1458	tags=21%, list=11%, signal=19%	LPAR1/CHI3L1/PELI2/BIRC7/PDGFRB/IL1B/PDGFRA/IL1A/CCR1/MEF2C/GRM5/JCAD/ITGB3/ICAM1/IGF2/WNT7B/NOD1/CSPG4/TGFB1/TGFB3/ADRA1B/SPHK1/ITGA1/WNT5A/DOK3/ALKAL1/ZC3H12A/NRP1/EFNA1/WNT7A/FGG/CCL2/TLR4/GADD45B/FGF1/TRAF2/MAP3K10/GAS6/MAP3K4/GSDME/IGFBP4/DNAJC27/IL11/PDGFB/IGF1R/FGA/CTNNB1/CDH2/CD74/CDON/DOK6/MAPK8IP3/TGFBR1/FGB/CDC42/APOE/THBS1/FERMT2/CCL20
BP	GO:0050808	synapse organization	281	0.402978	1.65797	2.71252e-05	0.000751218	0.000600403	1336	tags=20%, list=10%, signal=19%	PTK7/SRGN/ICAM5/CACNB1/MEF2C/ZNF365/GRM5/SPARCL1/ARHGAP22/EFNA5/THBS2/NEGR1/ITGB3/DLG4/AMIGO2/PLXND1/DNER/WNT7B/POU4F1/LRRTM2/DRD1/TANC2/EPHA4/COL4A1/EPHB2/PLXNC1/SNAP25/LRFN4/FLRT2/WNT5A/STK38L/LRP4/NRP1/EFNA1/WNT7A/PTPN13/C1QL1/ITGA3/ITGB1/ITPKA/CDH6/LARGE1/TNC/PTPRS/LRRC4/COL4A5/LRP8/GRIN2B/IGF1R/GABRB3/CTNNB1/CDH2/NRP2/CLN3/CDC42/DMPK/APOE
CC	GO:0032587	ruffle membrane	80	0.480693	1.6577	0.00227857	0.0238056	0.0190264	2169	tags=22%, list=16%, signal=19%	PDPN/FAP/JCAD/ITGB3/ITGA5/ITGB1/ADAM17/PPP1R9B/ITGAV/PLEKHO1/SPRY4/PDE4A/FERMT1/FGD5/PSD4/PIP5K1A/TLN1/APPL2
BP	GO:1903305	regulation of regulated secretory pathway	69	0.485143	1.65693	0.00345976	0.0325413	0.0260083	2096	tags=23%, list=16%, signal=20%	SYT1/SYP/RIMS3/STX1A/DOC2A/RAC2/SYT12/WNT7A/IL4R/DVL1/RAB15/STXBP1/RAB27A/RABGEF1/BAIAP3/SYT11
CC	GO:0031256	leading edge membrane	120	0.452149	1.65662	0.000388987	0.00625517	0.00499938	1858	tags=22%, list=14%, signal=19%	PDPN/THY1/ANTXR1/FAP/JCAD/KCNC2/ITGB3/PLXND1/ITGA5/CSPG4/ITGB1/KCNC1/ADAM17/PPP1R9B/ITGAV/PLEKHO1/CDC42/LAMP5/SPRY4/PDE4A/FERMT2/FERMT1/FGD5/PSD4/ANK1/DOCK8
BP	GO:0007416	synapse assembly	103	0.461097	1.65463	0.00106724	0.0136415	0.0109028	1106	tags=24%, list=8%, signal=22%	ICAM5/MEF2C/EFNA5/THBS2/NEGR1/AMIGO2/PLXND1/DNER/POU4F1/LRRTM2/DRD1/EPHB2/SNAP25/LRFN4/FLRT2/WNT5A/LRP4/WNT7A/PTPN13/LARGE1/PTPRS/LRRC4/GABRB3/CTNNB1/CDH2
BP	GO:0007409	axonogenesis	277	0.403546	1.65423	1.75521e-05	0.000525735	0.000420188	2102	tags=29%, list=16%, signal=25%	LAMA2/PTK7/THY1/PRKG1/GLI3/EDNRA/NDP/CDH11/EFNA5/CXCL12/DRAXIN/KIF5A/PLXND1/SEMA4B/POU4F1/GDF7/EPHA4/EPHB2/PLXNC1/SNAP25/NOTCH3/FLRT2/WNT5A/ROBO3/MAP1A/SHH/KLF7/LRP4/FN1/NRP1/GLI2/EFNA1/WNT7A/ETV1/ITGB1/EFNA3/PTPRS/SPP1/IGF1R/CDH2/ULK2/LLGL1/NRP2/ZFYVE27/NUMBL/ADAM17/EGR2/EMB/PAX6/NPR2/B3GNT2/ULK1/ARHGEF40/APOE/PTCH1/DVL1/SMURF1/C12orf57/TUBB3/APBB1/TRPC5/SRF/EXT1/EFNA2/IST1/VCL/ECE1/SEMA4C/EFNB2…
MF	GO:0046332	SMAD binding	68	0.485252	1.64756	0.00316162	0.0304764	0.024358	1895	tags=31%, list=14%, signal=27%	COL1A2/CREB3L1/RANBP3L/COL5A2/PMEPA1/HMGA2/CTNNB1/TGFBR1/FOS/PAX6/SMURF1/TGFB1I1/FERMT2/RNF111/PPARG/LDLRAD4/MEF2A/SMAD3/ACVR1/FLNA/TGFBRAP1
BP	GO:0018108	peptidyl-tyrosine phosphorylation	169	0.423574	1.64571	0.000106136	0.00227915	0.00182159	1850	tags=26%, list=14%, signal=23%	CRLF1/PDGFRB/SOCS1/SOCS3/PDGFRA/DDR2/CTF1/GRM5/EFNA5/ITGB3/SPINK1/EFEMP1/DLG4/IGF2/IL7/EPHA4/EPHB2/ITGA5/CSPG4/TGFB1/PECAM1/LRP4/NRP1/EFNA1/LRRK1/CLK1/IL11/LRP8/PLPP3/PDGFB/IGF1R/IL6ST/CD74/ADAM17/JAK3/CBL/HES1/CLCF1/TNK2/ACVR1/IL12A/CADM4/DYRK1A/CD40
BP	GO:0048754	branching morphogenesis of an epithelial tube	102	0.458077	1.64529	0.00197604	0.0214475	0.0171417	1889	tags=29%, list=14%, signal=25%	HHIP/GLI3/EDNRA/TBX2/HS3ST3A1/FOXC2/PLXND1/ENG/GDF7/COL4A1/MMP14/CELSR1/CSF1/ADAMTS16/WNT5A/SHH/RASIP1/NRP1/GLI2/FGF1/TNC/CTNNB1/PTCH1/WNT4/SRF/EXT1/SALL1/ACVR1/PKD2/GREB1L
BP	GO:0008589	regulation of smoothened signaling pathway	68	0.484251	1.64416	0.00327799	0.0312956	0.0250127	1659	tags=24%, list=13%, signal=21%	HHIP/GLI3/PRRX1/RUNX2/CHSY1/GAS1/GLI1/RAB34/SHH/IFT140/PTCH1/DYNC2H1/CDK20/KIF7/SERPINE2/INTU
BP	GO:0007162	negative regulation of cell adhesion	189	0.418593	1.64402	0.000176437	0.00338284	0.0027037	1676	tags=26%, list=13%, signal=23%	MMP2/POSTN/APOD/COL1A1/SOCS1/PRKG1/GLI3/EFNA5/CXCL12/LRRC32/LAG3/AKNA/PLXND1/CORO2B/ACER2/EPHA4/MMP14/EPHB2/PLXNC1/TGFB1/ABCA12/SHH/ZC3H12A/CEBPB/SNAI2/RND1/RUNX1/TNC/IL1RN/SERPINE1/IL4R/PELI1/TGFBI/CD74/SDC4/MUC1/SPOCK1/CDKN2A/JAK3/FBLN1/JAG1/SPRY4/THBS1/TWSG1/ANGPT2/SH2B3/SERPINE2/ADAM22/IRF1
BP	GO:0035924	cellular response to vascular endothelial growth factor stimulus	45	0.523504	1.64185	0.00410178	0.0370808	0.0296364	2021	tags=40%, list=15%, signal=34%	DCN/PDGFRB/ADGRA2/EMILIN1/PDGFRA/JCAD/GAS1/FOXC1/SPHK1/NRP1/VEGFB/NRP2/IL12A/CADM4/ROBO1/ATP2B4/EGR3/PIK3CD
BP	GO:0014020	primary neural tube formation	78	0.479401	1.64109	0.00195465	0.0213655	0.0170761	2203	tags=28%, list=17%, signal=24%	VANGL2/CTHRC1/PTK7/TWIST1/HIF1A/CELSR1/TGFB1/WNT5A/SDC4/PTCH1/DVL1/CDK20/RARG/SEMA4C/CECR2/LMO4/TEAD2/PLXNB2/MTHFR/PHACTR4/RARA/FZD6
CC	GO:0034702	monoatomic ion channel complex	117	0.44651	1.63463	0.00124151	0.0152813	0.0122134	1104	tags=23%, list=8%, signal=21%	SCN4B/KCNN1/KCNJ6/CACNB1/CLIC6/KCNC2/DLG4/STAC3/PORCN/CNIH3/MCUB/CACHD1/KCNA7/KCNE5/CACNA1A/KCNN4/TRPC1/KCND3/KCNJ14/PDE4D/LRRC8C/CHRNE/KCNMB4/SCNN1A/GRIN2B/GABRB3/KCNC1
BP	GO:0001649	osteoblast differentiation	167	0.422396	1.63269	0.00052593	0.00777641	0.00621522	1744	tags=26%, list=13%, signal=23%	CTHRC1/COL1A1/GLI3/DDR2/IFITM1/SNAI1/MEF2C/CREB3L1/RANBP3L/RUNX2/TWIST1/IGF2/IGFBP5/LOX/GLI1/MRC2/WNT7B/JUNB/WNT11/SHH/GLI2/FOSL2/CEBPB/SNAI2/COL6A1/TNC/SPP1/CEBPD/TP63/IL6ST/CTNNB1/NOCT/ALPL/JAG1/PTCH1/WNT4/ACVR2B/TWSG1/FERMT2/CHRD/PPARG/SMAD3/ACVR1/WWTR1
BP	GO:0010977	negative regulation of neuron projection development	99	0.456662	1.63122	0.00199434	0.0215456	0.0172201	1891	tags=32%, list=14%, signal=28%	LPAR1/THY1/ZNF365/DRAXIN/BCL11A/SEMA4B/EPHA4/EPHB2/FAT3/WNT5A/LRP4/NRP1/EFNA1/NR2F1/PMP22/PTPRS/SPP1/KREMEN1/PTPRG/DPYSL3/ULK2/RTN4RL1/SPOCK1/IL15RA/ULK1/APOE/HES1/DNM3/SEMA4C/EFNB2/RUFY3/FLNA
CC	GO:0042383	sarcolemma	94	0.462944	1.63119	0.000993541	0.0129849	0.010378	1822	tags=32%, list=14%, signal=28%	LAMA2/PRKG1/SLC2A5/COL6A2/COL6A3/CACNB1/SGCA/BGN/FLNC/STAC3/TGFB3/SYNC/KCND3/CIB2/ITGB1/COL6A1/FKRP/IGF1R/SLC2A1/RTN2/CDH2/AHNAK2/SSPN/SLC8B1/ASB3/VCL/SLC38A2/SLC9A1/PLEC/ANK1
BP	GO:0007169	transmembrane receptor protein tyrosine kinase signaling pathway	447	0.378768	1.62927	1.69831e-06	7.4544e-05	5.95786e-05	1595	tags=19%, list=12%, signal=18%	MMP2/PLAT/DCN/APOD/PDGFRB/COL1A1/SOCS1/SOCS3/ADGRA2/HHIP/EMILIN1/IL1B/PDGFRA/DDR2/TMEM204/AFAP1L2/JCAD/TBX2/CREB3L1/RUNX2/EFNA5/FOXC2/ITGB3/EFEMP1/IGF2/IGFBP5/LOX/NRTN/FOXC1/PTPRE/EPHA4/HIF1A/COL4A1/EPHB2/ITGA5/CSPG4/TGFB1/CSF1/COL4A2/SOCS2/FLRT2/ITGA1/WNT5A/DOK3/COL4A3/AXL/TYRO3/SULF1/ALKAL1/NRP1/EFNA1/FGF1/VEGFB/IGFBP1/EFNA3/CDH3/IGFBP4/COL4A5/SULF2/PTPRG/PDGFB/IGF1R/EPN2/ANGPTL1/CTNNB1/VAV1/DO…
BP	GO:0051592	response to calcium ion	88	0.465	1.62839	0.00408361	0.037007	0.0295775	2122	tags=28%, list=16%, signal=24%	SYT1/MEF2C/ITPKB/CPNE7/ALOX5AP/JUNB/TRPC1/WNT5A/SYT12/FGG/ITPKA/KCNMB4/AQP3/GIPR/FGA/FGB/FOS/THBS1/ITPKC/FOSB/MEF2A/PKD2/IQGAP1/SYT11/HOMER1
MF	GO:0004930	G protein-coupled receptor activity	122	0.440455	1.62662	0.001606	0.0185764	0.014847	1257	tags=28%, list=10%, signal=25%	LPAR1/PDGFRB/ADGRA2/EDNRA/CCR1/ACKR2/MC1R/GRM5/ADGRF4/SCTR/HRH1/PTGFR/NPR3/MRGPRF/DRD1/ADGRG1/CELSR1/ADGRD1/ADRA1B/SPHK1/GPR176/P2RY2/GPR87/ADRA1D/SORCS3/OR1F1/LPAR5/GPR157/GIPR/MCHR1/AGTRAP/AGTR1/GPR39/GLP2R
BP	GO:0010631	epithelial cell migration	237	0.403317	1.62627	0.00014746	0.00292365	0.0023367	2021	tags=28%, list=15%, signal=24%	DCN/DAAM2/SPARC/FSTL1/FAP/ADGRA2/SNAI1/MEF2C/JCAD/FOXC2/ITGB3/PLXND1/VSTM4/HAS2/ZEB2/KRT16/PLEKHG5/HIF1A/ADAMTS9/TGFB1/WNT5A/ZC3H12A/NRP1/EFNA1/WNT7A/ITGA3/FGF1/SNAI2/ITGB1/ETS1/PLPP3/PTPRG/PDGFB/LRG1/RIN2/NRP2/TGFBR1/ADAM17/CLN3/APOE/LOXL2/STAT5A/THBS1/DNAJA4/SPRED1/ANGPT2/SRF/PPARG/EPPK1/EFNB2/FOXP1/SCG2/PXN/FERMT1/CD40/ROBO1/HBEGF/MECP2/ATP2B4/MAP4K4/EGR3/MAP3K3/PLK2/EVL/FUT1/PIK3CD
BP	GO:0006029	proteoglycan metabolic process	64	0.483216	1.62476	0.00548817	0.045514	0.0363766	2717	tags=42%, list=21%, signal=34%	CHSY3/HS3ST3A1/CHSY1/B3GAT2/CHST11/CHST3/SULF1/ADAMTS7/CSGALNACT2/SULF2/FOXL1/CTNNB1/CHST10/DSE/CHST15/EXT1/SLC2A10/CHST14/HS3ST2/CHST12/HS3ST3B1/CHPF2/BMP2/BMPR2/B3GALT6/NDST1/CSGALNACT1
BP	GO:0007229	integrin-mediated signaling pathway	80	0.47075	1.62341	0.00350699	0.0328528	0.0262572	2175	tags=40%, list=16%, signal=34%	LAMA2/THY1/ITGBL1/ITGAL/ITGB3/ADAMTS1/FERMT3/ITGA5/COL16A1/ITGB6/NID1/ITGA1/ITGA10/FN1/NRP1/ITGA3/ITGB1/LIMS2/TIMP1/PLPP3/VAV1/ITGAV/CDC42/LAT/FERMT2/SLC2A10/ITGB8/FERMT1/FLNA/PHACTR4/TLN1/LAMB1
CC	GO:0031091	platelet alpha granule	72	0.475806	1.61993	0.00583324	0.0473374	0.037834	1474	tags=36%, list=11%, signal=32%	SRGN/SPARC/THBS2/ITGB3/SERPINA3/IGF2/FERMT3/SERPING1/TGFB1/TGFB3/PCDH7/PECAM1/ORM1/FN1/FGG/VEGFB/CD109/GAS6/SERPINE1/TIMP1/PDGFB/FGA/FGB/THBS1/A2M/PPBP
BP	GO:0090132	epithelium migration	238	0.401107	1.61884	0.000178922	0.00340244	0.00271936	2021	tags=28%, list=15%, signal=24%	DCN/DAAM2/SPARC/FSTL1/FAP/ADGRA2/SNAI1/MEF2C/JCAD/FOXC2/ITGB3/PLXND1/VSTM4/HAS2/ZEB2/KRT16/PLEKHG5/HIF1A/ADAMTS9/TGFB1/WNT5A/ZC3H12A/NRP1/EFNA1/WNT7A/ITGA3/FGF1/SNAI2/ITGB1/ETS1/PLPP3/PTPRG/PDGFB/LRG1/RIN2/NRP2/TGFBR1/ADAM17/CLN3/APOE/LOXL2/STAT5A/THBS1/DNAJA4/SPRED1/ANGPT2/SRF/PPARG/EPPK1/EFNB2/FOXP1/SCG2/PXN/FERMT1/CD40/ROBO1/HBEGF/MECP2/ATP2B4/MAP4K4/EGR3/MAP3K3/PLK2/EVL/FUT1/PIK3CD
BP	GO:0019221	cytokine-mediated signaling pathway	304	0.390737	1.61848	3.80568e-05	0.000984075	0.000786512	1956	tags=27%, list=15%, signal=24%	DUOX2/PXDN/CRLF1/BIRC7/SOCS1/TBKBP1/IL1B/IL1A/IFITM1/CCR1/ACKR2/DUOX1/CXCL12/TRAF5/IFITM2/IL20RA/OSMR/IL7/FOXC1/HIF1A/NLRC5/CSF1/IL1R1/SPHK1/CXCL1/WNT5A/AXL/IFITM3/IL2RG/TICAM2/CXCL2/NFKBIZ/LIFR/GREM2/CCL2/IL10RB/TRAF2/PF4V1/GAS6/IL1RN/IL11/LRP8/IL4R/PDGFB/IL6ST/IFNLR1/AGPAT2/CD74/EGR1/NUMBL/ADAM17/IL15RA/IL18R1/JAK3/ULK1/F3/MUL1/STAT5A/CBL/STAT2/CCL20/CLCF1/CXCL8/PPBP/STAT3/CXCL6/EXT1/PPARG/EPOR…
BP	GO:0050921	positive regulation of chemotaxis	83	0.466544	1.61802	0.00252175	0.0256924	0.0205344	1835	tags=31%, list=14%, signal=27%	LPAR1/PDGFRB/PDGFRA/CCR1/CXCL12/TNFSF14/LBP/RAC2/TGFB1/CSF1/WNT5A/NRP1/VEGFB/CAMK1D/GAS6/SERPINE1/PDGFB/CD74/ADAM17/F3/THBS1/CXCL8/SMAD3/IL12A/SCG2/S1PR1
BP	GO:0090130	tissue migration	239	0.400257	1.61645	0.000141481	0.00283734	0.00226771	2021	tags=28%, list=15%, signal=24%	DCN/DAAM2/SPARC/FSTL1/FAP/ADGRA2/SNAI1/MEF2C/JCAD/FOXC2/ITGB3/PLXND1/VSTM4/HAS2/ZEB2/KRT16/PLEKHG5/HIF1A/ADAMTS9/TGFB1/WNT5A/ZC3H12A/NRP1/EFNA1/WNT7A/ITGA3/FGF1/SNAI2/ITGB1/ETS1/PLPP3/PTPRG/PDGFB/LRG1/RIN2/NRP2/TGFBR1/ADAM17/CLN3/APOE/LOXL2/STAT5A/THBS1/DNAJA4/SPRED1/ANGPT2/SRF/PPARG/EPPK1/EFNB2/FOXP1/SCG2/PXN/FERMT1/CD40/ROBO1/HBEGF/MECP2/ATP2B4/MAP4K4/EGR3/MAP3K3/PLK2/EVL/FUT1/PIK3CD
BP	GO:0002040	sprouting angiogenesis	84	0.462918	1.615	0.00279372	0.0279332	0.0223253	2381	tags=38%, list=18%, signal=31%	ADGRA2/JCAD/CREB3L1/FOXC2/VSTM4/ADAMTS9/ITGA5/TGFB1/NRP1/FGF1/ITGB1/VEGFB/EPN2/AGTR1/LOXL2/THBS1/SPRED1/E2F7/SRF/EFNB2/RNF213/IL12A/ROBO1/EGR3/MAP3K3/PLK2/FUT1/HDAC7/ANGPT1/PKM/PGF/PARVA
BP	GO:0051897	positive regulation of phosphatidylinositol 3-kinase/protein kinase B signal transduction	102	0.448134	1.60957	0.0030039	0.0295265	0.0235987	1485	tags=24%, list=11%, signal=21%	DCN/CHI3L1/PDGFRB/PDGFRA/DDR2/MC1R/IGF2/IGFBP5/ENG/TGFB1/AXL/MEIS3/FN1/ITGB1/GAS6/PDGFB/IGF1R/TGFBR1/F3/HCST/THBS1/CBL/FERMT2/TSPYL5
CC	GO:0044309	neuron spine	103	0.448203	1.60836	0.00204298	0.0218919	0.0174969	2614	tags=33%, list=20%, signal=27%	LPAR1/LAMA2/GRM5/PDLIM4/DLG4/IGF2BP1/DRD1/TANC2/EPHA4/EPHB2/PRRT2/KCND3/ITGB1/ITPKA/LRRC4/PPP1R9B/CDC42/DVL1/ZMYND8/DNM3/ARHGAP33/DNAJB1/SORCS2/SYNE1/MTMR2/SYT11/HOMER1/FBXO2/SRGAP2/CTNND1/ABI2/PSD/KCNC3/ARHGAP44
BP	GO:0031099	regeneration	142	0.425813	1.60694	0.00142084	0.0170086	0.013594	1443	tags=23%, list=11%, signal=21%	MMP2/POSTN/APOD/HOPX/THY1/PRRX1/SGCA/CXCL12/GLI1/NNMT/EPHA4/APOA4/AXL/WNT7A/CEBPB/RUNX1/LARGE1/TNC/IGFBP1/GAS6/PTPRS/SPP1/KREMEN1/SULF2/FKRP/IGF1R/RTN4RL1/UPF2/MAPK8IP3/NREP/ULK1/PTCH1/ANGPT2
BP	GO:0022409	positive regulation of cell-cell adhesion	191	0.408387	1.60672	0.00065545	0.00927868	0.00741589	1287	tags=21%, list=10%, signal=19%	PDPN/THY1/SOCS1/GLI3/EMILIN1/IL1B/IL1A/TNFSF14/ITPKB/IGF2/ADAM19/HAS2/IL7/CARD11/KLHL25/ST3GAL4/WNT5A/SHH/IL2RG/NFKBIZ/GLI2/FGG/CCL2/ETS1/RUNX1/MAP3K8/PLPP3/LGALS1/IL4R/IL6ST/EMILIN2/FGA/CD74/SLC7A1/VAV1/KIFAP3/CD276/SMARCD3/FGB/FSTL3
CC	GO:0031252	cell leading edge	330	0.386422	1.60589	1.49871e-05	0.000468349	0.000374323	2640	tags=28%, list=20%, signal=23%	PDPN/DUOXA2/DUOX2/THY1/ANTXR1/FAP/DUOX1/JCAD/LAYN/WIPF1/KCNC2/ITGB3/PDLIM4/IGF2BP1/PLXND1/PLEKHG5/ARHGAP31/ITGA5/RAC2/CSPG4/SNAP25/ARAP3/NHS/TLR4/PTPN13/ITGB1/DPYSL3/CTNNB1/KCNC1/CDH2/ADAM17/PPP1R9B/ITGAV/PLEKHO1/CDC42/LAMP5/SPRY4/PDE4A/CYTH3/FERMT2/TUBB3/APBB1/ABLIM3/MYO5A/FSCN1/S100A11/CADM4/PDLIM7/PXN/TMEM87A/SLC9A1/FERMT1/FGD5/PSD4/PLEKHH2/PKD2/MYO10/ANK1/RUFY3/MYO9B/DOCK8/LMO4/DCTN1/PIP5K1A/…
BP	GO:0030316	osteoclast differentiation	67	0.474279	1.60579	0.00565816	0.0465664	0.0372177	2787	tags=42%, list=21%, signal=33%	CCR1/LRRC17/FBN1/SIGLEC15/SNX10/POU4F1/JUNB/CSF1/FOSL2/TLR4/CEBPB/LRRK1/CD109/CTNNB1/FOS/FSTL3/EFNA2/MAFB/FOXP1/SLC9B2/KLF10/BMP2/OSTM1/UBASH3B/NOTCH2/PIAS3/TNFRSF11B/FBXW7
BP	GO:0060348	bone development	150	0.423541	1.6045	0.000599362	0.0086376	0.00690351	2462	tags=36%, list=19%, signal=30%	COL1A1/GLI3/GJA1/DDR2/LRRC17/BGN/MEF2C/RANBP3L/FBN1/BNC2/RUNX2/CHSY1/SIGLEC15/TWIST1/LOX/SNX10/TGM2/HAS2/ENG/FOXC1/MMP14/TGFB3/ITGB6/SULF1/FOSL2/ADAMTS7/LRRK1/LARGE1/TRIM45/SULF2/ALPL/NPR2/LTBP3/NAB2/SH3PXD2B/EXT1/SERPINH1/RARG/FOXP1/NAB1/SLC9B2/EVC/RARA/CHAD/P3H1/PTGER4/BMP2/BMPR2/PLXNB1/PLS3/INPPL1/SLC10A7/IFT80/SKI
BP	GO:0010721	negative regulation of cell development	173	0.41223	1.601	0.00051509	0.00769767	0.00615228	1311	tags=23%, list=10%, signal=21%	DAAM2/THY1/SOCS1/GLI3/PAEP/IL1B/IL1A/LRRC17/FBN1/DRAXIN/BCL11A/LAG3/SEMA4B/EPHB2/TMEM176A/WNT5A/SHH/LRP4/ZC3H12A/NRP1/WNT7A/TLR4/CDKN2B/SNAI2/RUNX1/TMEM176B/PTPRS/SPP1/IL4R/TSC22D1/CTNNB1/CD74/ULK2/KIFAP3/PAX6/NPR2/FSTL3/JAK3/ULK1
BP	GO:0001764	neuron migration	108	0.443163	1.60047	0.00203155	0.0218352	0.0174516	1554	tags=28%, list=12%, signal=25%	PRKG1/MEF2C/CXCL12/IGSF10/TWIST1/DNER/POU4F1/DRD1/NAV1/ADGRG1/CELSR1/FAT3/BBS1/FLRT2/GNRH1/AXL/TYRO3/NRP1/ITGA3/LARGE1/GAS6/CTNNB1/NRP2/SPOCK1/PAX6/CELSR2/DDIT4/LRP12/STAT3/SRF
MF	GO:0070851	growth factor receptor binding	87	0.457074	1.59809	0.0043689	0.0387921	0.0310042	2514	tags=38%, list=19%, signal=31%	PDGFRB/IL1B/PDGFRA/IL1A/ITGB3/EFEMP1/TLR5/NRTN/IL7/ITGA5/IL1R1/FLRT2/FGF1/VEGFB/IL1RN/IL11/PDGFB/IL6ST/ADAM17/ERAP1/TNK2/IL12A/CADM4/HBEGF/PLSCR1/FLRT3/NHERF1/CCDC88A/PGF/PSPN/CSF2/SOCS5/SHC1
BP	GO:0090092	regulation of transmembrane receptor protein serine/threonine kinase signaling pathway	186	0.405644	1.59347	0.000429719	0.00669422	0.00535029	1786	tags=26%, list=14%, signal=23%	FSTL1/EMILIN1/FBN1/PMEPA1/CHST11/LOX/ZEB1/HTRA1/CHRDL2/ENG/ZEB2/GDF7/SPRED3/TGFB1/TGFB3/WNT5A/SHH/SULF1/GREM2/LTBP1/ITGA3/CDKN2B/DKK3/CD109/SNX25/LTBP4/LRG1/TGFBR1/ADAM17/FSTL3/NREP/THBS1/SMURF1/TGFB1I1/ACVR2B/TWSG1/SPRED1/HES1/CHRD/CTDSPL2/RNF111/PPARG/LDLRAD4/SLC2A10/SMAD3/ACVR1/NBL1/RBBP4/FERMT1
BP	GO:0046632	alpha-beta T cell differentiation	77	0.463311	1.59116	0.00436405	0.0387921	0.0310042	2602	tags=38%, list=20%, signal=30%	SOCS1/SOCS3/GLI3/ITPKB/BCL3/JUNB/KLHL25/PRDM1/SHH/IL2RG/ZC3H12A/NFKBIZ/FOSL2/RUNX1/IL4R/IL18R1/JAK3/STAT3/IRF1/FOXP1/HLX/RARA/PTGER4/RC3H1/RORA/SOCS5/BCL6/ABL1/RELB
BP	GO:0010975	regulation of neuron projection development	306	0.382511	1.58698	4.24647e-05	0.00106618	0.000852136	2384	tags=27%, list=18%, signal=23%	LPAR1/PTK7/THY1/DDR2/PRRX1/ZNF365/PREX1/EFNA5/CXCL12/DRAXIN/NEGR1/BCL11A/PLXND1/SEMA4B/TANC2/EPHA4/EPHB2/PLXNC1/FAT3/SNAP25/KNDC1/WNT5A/ROBO3/LRP4/ALKAL1/FN1/NRP1/EFNA1/WNT7A/ITGA3/ITPKA/NR2F1/CAMK1D/PMP22/PTPRS/SPP1/KREMEN1/LRP8/PTPRG/DPYSL3/IGF1R/CDH2/ULK2/RTN4RL1/ZFYVE27/SPOCK1/PAX6/IL15RA/ULK1/APOE/SARM1/DVL1/SMURF1/HES1/TRPC5/SRF/DNM3/IST1/ARHGAP33/SEMA4C/EFNB2/PLXNA1/SYNE1/RUFY3/ROBO1/FLNA/…
BP	GO:0045596	negative regulation of cell differentiation	438	0.370883	1.58573	7.63644e-06	0.000259974	0.000207782	1744	tags=24%, list=13%, signal=22%	IRX3/DAAM2/HOPX/THY1/SOCS1/GLI3/PAEP/IL1B/IL1A/COL5A1/SNAI1/LRRC17/H4C5/RANBP3L/FBN1/COL5A2/DRAXIN/BCL11A/ITGB3/LAG3/EFEMP1/ITPKB/TWIST1/IGF2/IGFBP5/ZEB1/SEMA4B/RGS4/NFATC1/SPRED3/EPHA4/EPHB2/TGFB1/TMEM176A/NOTCH3/TRIB2/WNT5A/SHH/SOD2/BRD9/LRP4/ZC3H12A/NRP1/EFNA1/OSR1/WNT7A/TLR4/H4C3/ADAMTS7/CDKN2B/SNAI2/ITGB1/LBH/RUNX1/TP53INP1/CRP/TMEM176B/PTPRS/SPP1/TP63/IL4R/PDGFB/BBS12/TSC22D1/CTNNB1/NOCT/ZB…
BP	GO:0030902	hindbrain development	101	0.442103	1.58526	0.00400315	0.036568	0.0292266	1939	tags=28%, list=15%, signal=24%	LPAR1/PRKG1/ZNF365/GLI1/HOXB2/POU4F1/FOXC1/EPHB2/KNDC1/SHH/GLI2/WNT7A/ITGB1/WHRN/PTPRS/IGF1R/CTNNB1/KCNC1/EGR2/PAX6/HES1/SERPINE2/MAFB/UQCRQ/SEMA4C/FLNA/NCOR2/MECP2
BP	GO:0003231	cardiac ventricle development	81	0.457	1.58207	0.0055235	0.0457278	0.0365474	3213	tags=46%, list=24%, signal=35%	PTK7/EDNRA/MEF2C/FOXC2/ENG/POU4F1/FOXC1/HIF1A/TGFB1/PRDM1/WNT11/WNT5A/TGFBR1/SMARCD3/JAG1/AP2B1/HES1/SALL1/ACVR1/ROBO1/GREB1L/LMO4/SEMA3C/PPP1R13L/BMPR2/RBM15/CCN1/CPE/RBPJ/TMEM65/FZD1/PROX1/MYL3/TPM1/MDM2/NOTCH1/SOX4
BP	GO:0051962	positive regulation of nervous system development	176	0.406979	1.58203	0.00110396	0.0140082	0.0111959	2384	tags=34%, list=18%, signal=28%	GLI3/IL1B/ZNF365/GRM5/EFNA5/THBS2/CXCL12/AMIGO2/PLXND1/TGM2/LRRTM2/EPHA4/HIF1A/EPHB2/HAPLN3/PLXNC1/TGFB1/FLRT2/SHH/FN1/NRP1/WNT7A/RASSF10/ITGB1/ITPKA/PRKCH/LRP8/IL6ST/CTNNB1/PLAG1/CDON/ASPA/ZFYVE27/NUMBL/EGR2/SMARCD3/PAX6/SMURF1/HES1/CLCF1/TRPC5/SRF/IST1/SERPINE2/MYRF/PLXNA1/RUFY3/ROBO1/CLSTN1/MECP2/OBSL1/FLRT3/PLXNB2/NGF/CAPRIN2/PARP6/BMP2/DBN1/BMPR2/PLXNB1
BP	GO:0033002	muscle cell proliferation	139	0.421156	1.57876	0.00155624	0.0182537	0.0145891	1751	tags=25%, list=13%, signal=22%	MMP2/APOD/PDGFRB/EFEMP2/PRKG1/GJA1/DDR2/MEF2C/TBX2/FOXC2/ITGB3/ADAMTS1/IGFBP5/GLI1/FOXC1/TGFB1/TGFB3/NOTCH3/SHH/SOD2/TLR4/RUNX1/PDGFB/IGF1R/CTNNB1/TGFBR1/FOS/APOE/THBS1/VIP/PPARG/TNFAIP3/FOXP1/SELENON/IL12A
BP	GO:0022407	regulation of cell-cell adhesion	294	0.381295	1.57804	0.00013176	0.00271879	0.00217296	1759	tags=23%, list=13%, signal=21%	PDPN/THY1/SOCS1/PRKG1/GLI3/EMILIN1/IL1B/IL1A/EFNA5/CXCL12/LRRC32/LAG3/TNFSF14/ITPKB/AKNA/IGF2/ADAM19/HAS2/IL7/FERMT3/CARD11/TGFB1/ABCA12/KLHL25/ST3GAL4/WNT5A/SHH/IL2RG/ZC3H12A/NFKBIZ/GLI2/FGG/CCL2/CEBPB/ETS1/RUNX1/IL1RN/MAP3K8/PLPP3/LGALS1/IL4R/IL6ST/EMILIN2/PELI1/FGA/CD74/SLC7A1/VAV1/SDC4/KIFAP3/CD276/SMARCD3/FGB/FSTL3/JAK3/CELSR2/JAG1/WNT4/TWSG1/SMARCE1/HES1/SH2B3/SERPINE2/IRF1/EFNB2/HLX/IL12A/…
BP	GO:0030111	regulation of Wnt signaling pathway	260	0.385431	1.57549	0.000224004	0.00410322	0.00327946	3025	tags=33%, list=23%, signal=26%	CTHRC1/PTK7/DAAM2/DACT1/COL1A1/ADGRA2/GLI3/WIF1/DRAXIN/CXXC4/MDFI/GLI1/PLEKHA4/ZEB2/TGFB1/TLE3/ATP6V0C/ATP6V1C2/WNT11/WNT5A/WNT5B/SHH/LRP4/SULF1/ITGA3/SNAI2/LRRK1/DKK3/IGFBP1/CDH3/IGFBP4/KREMEN1/PLPP3/SULF2/FOXL1/CTNNB1/MBD2/CDH2/TRABD2B/EGR1/TLE4/APOE/SALL1/TNFAIP3/CCAR2/SMAD3/RNF213/WWTR1/FERMT1/HMGXB4/TBL1XR1/CSNK1G2/DAPK3/NHERF1/FZD6/MCC/CAPRIN2/RBMS3/NKD1/SPIN1/BMP2/LMBR1L/CTNND1/RNF146/CTDN…
BP	GO:0010594	regulation of endothelial cell migration	123	0.424218	1.57416	0.00309921	0.0300826	0.0240432	2021	tags=30%, list=15%, signal=26%	DCN/SPARC/ADGRA2/MEF2C/JCAD/FOXC2/ITGB3/HIF1A/ADAMTS9/TGFB1/WNT5A/ZC3H12A/NRP1/EFNA1/WNT7A/FGF1/ETS1/PLPP3/PDGFB/RIN2/NRP2/ADAM17/APOE/STAT5A/THBS1/DNAJA4/SPRED1/ANGPT2/PPARG/FOXP1/CD40/MECP2/ATP2B4/MAP3K3/PLK2/FUT1/PIK3CD
BP	GO:0006935	chemotaxis	255	0.384808	1.57345	0.000164082	0.00318978	0.0025494	2021	tags=29%, list=15%, signal=25%	MMP2/LPAR1/PDGFRB/ADGRA2/IL1B/PDGFRA/CCR1/ACKR2/PREX1/EFNA5/CXCL12/ITGB3/TNFSF14/LOX/CMTM3/SEMA4B/LBP/PLEKHG5/CXCL14/RAC2/TGFB1/CSF1/CXCL1/FLRT2/ITGA1/WNT5A/ROBO3/PLAU/CXCL2/NRP1/CCL2/FGF1/TYMP/VEGFB/PF4V1/DOCK2/CAMK1D/GAS6/SERPINE1/MSMP/PDGFB/CD74/VAV1/MTUS1/AGTR1/NRP2/ADAM17/CKLF/ITGAV/SLC8B1/F3/THBS1/ANGPT2/CCL20/CXCL8/PPBP/DOCK4/CXCL6/SEMA4C/EFNB2/SMAD3/NBL1/IL12A/SCG2/PLEC/S1PR1/ROBO1/IL17RC…
BP	GO:0042330	taxis	255	0.384808	1.57345	0.000164082	0.00318978	0.0025494	2021	tags=29%, list=15%, signal=25%	MMP2/LPAR1/PDGFRB/ADGRA2/IL1B/PDGFRA/CCR1/ACKR2/PREX1/EFNA5/CXCL12/ITGB3/TNFSF14/LOX/CMTM3/SEMA4B/LBP/PLEKHG5/CXCL14/RAC2/TGFB1/CSF1/CXCL1/FLRT2/ITGA1/WNT5A/ROBO3/PLAU/CXCL2/NRP1/CCL2/FGF1/TYMP/VEGFB/PF4V1/DOCK2/CAMK1D/GAS6/SERPINE1/MSMP/PDGFB/CD74/VAV1/MTUS1/AGTR1/NRP2/ADAM17/CKLF/ITGAV/SLC8B1/F3/THBS1/ANGPT2/CCL20/CXCL8/PPBP/DOCK4/CXCL6/SEMA4C/EFNB2/SMAD3/NBL1/IL12A/SCG2/PLEC/S1PR1/ROBO1/IL17RC…
BP	GO:0001935	endothelial cell proliferation	109	0.433353	1.56646	0.00508082	0.0433484	0.0346458	2021	tags=35%, list=15%, signal=30%	COL8A1/SPARC/MEF2C/JCAD/CXCL12/ITGB3/IGF2/VSTM4/ZEB2/HIF1A/MMP14/WNT5A/COL4A3/SULF1/NRP1/CCL2/VEGFB/PDGFB/LRG1/AGTR1/NRP2/TGFBR1/ADAM17/F3/APOE/VASH2/LOXL2/STAT5A/THBS1/VIP/STAT3/PPARG/EGFL7/IL12A/SCG2/EGR3/FUT1/PIK3CD
BP	GO:0007178	transmembrane receptor protein serine/threonine kinase signaling pathway	270	0.38411	1.56523	0.00024177	0.00431538	0.00344902	1786	tags=25%, list=14%, signal=22%	COL1A2/FSTL1/EMILIN1/NDP/LTBP2/FBN1/RUNX2/WIF1/LRRC32/PMEPA1/CHST11/LOX/ZEB1/HTRA1/CHRDL2/ENG/ZEB2/GDF7/SPRED3/TGFB1/TGFB3/ITGB6/WNT5A/SHH/SULF1/GREM2/LTBP1/ITGA3/CDKN2B/DKK3/CD109/GAS6/SNX25/LTBP4/LRG1/EGR1/GDF11/TGFBR1/ADAM17/FOS/FURIN/FSTL3/NREP/LTBP3/THBS1/SMURF1/TGFB1I1/ACVR2B/TWSG1/SPRED1/FERMT2/HES1/CHRD/CTDSPL2/RNF111/STAT3/EXT1/PPARG/LDLRAD4/SLC2A10/ITGB8/SMAD3/ACVR1/NBL1/WWTR1/PXN/RBBP4…
BP	GO:0050731	positive regulation of peptidyl-tyrosine phosphorylation	97	0.439006	1.56118	0.0052735	0.0443419	0.0354398	1924	tags=31%, list=15%, signal=27%	CRLF1/CTF1/GRM5/EFNA5/ITGB3/DLG4/IGF2/EPHA4/ITGA5/CSPG4/TGFB1/PECAM1/LRP4/NRP1/EFNA1/LRRK1/IL11/LRP8/PLPP3/PDGFB/IL6ST/CD74/ADAM17/HES1/CLCF1/TNK2/ACVR1/IL12A/CD40/HBEGF
BP	GO:0030217	T cell differentiation	199	0.393406	1.5601	0.000454432	0.00701655	0.00560791	1736	tags=22%, list=13%, signal=20%	SOCS1/SOCS3/GLI3/IL1B/IL1A/PREX1/RUNX2/LAG3/ITPKB/ZEB1/IL7/BCL3/CARD11/TGFB1/JUNB/KLHL25/USP44/PRDM1/SHH/IL2RG/ZC3H12A/NFKBIZ/GLI2/FOSL2/RUNX1/DOCK2/IL4R/CTNNB1/CD74/VAV1/EGR1/ADAM17/SMARCD3/IL18R1/JAK3/ZFP36L1/WNT4/SMARCE1/STAT3/SRF/MAFB/IRF1/FOXP1/HLX
BP	GO:0050673	epithelial cell proliferation	300	0.376899	1.5552	0.000142534	0.00285027	0.00227805	1786	tags=25%, list=14%, signal=22%	COL8A1/SPARC/FAP/MEF2C/JCAD/TBX2/RUNX2/CXCL12/ITGB3/SPINK1/RASGRF1/TWIST1/IGF2/IGFBP5/ZEB1/GLI1/VSTM4/HAS2/ZEB2/HIF1A/MMP14/TGFB1/WNT5A/SHH/COL4A3/SULF1/NFKBIZ/NRP1/OSR1/WNT7A/CCL2/FGF1/CEBPB/CDKN2B/SNAI2/VEGFB/CD109/LIMS2/CDH3/IGFBP4/SULF2/TP63/PDGFB/CTNNB1/LRG1/AGTR1/NRP2/TGFBR1/ADAM17/PAX6/ZFP36L1/CDC42/F3/APOE/RAP1GAP/VASH2/JAG1/PTCH1/LOXL2/STAT5A/THBS1/HES1/VIP/STAT3/PPARG/NEAT1/EPPK1/INTU/E…
BP	GO:0007249	canonical NF-kappaB signal transduction	235	0.385099	1.55316	0.000411918	0.00648934	0.00518654	2929	tags=27%, list=22%, signal=21%	LPAR1/PELI2/GJA1/EDNRA/TBKBP1/IL1B/IL1A/TRAF5/NOD1/PLEKHG5/BCL3/CARD11/UBE2V1/WNT5A/TICAM2/ZC3H12A/TLR4/TRAF2/LGALS1/PELI1/CTNNB1/TIFA/CD74/ALPK1/SLC20A1/MUL1/SNIP1/TRIM68/TNFAIP3/INAVA/IKBKB/IKBKE/CD40/FBXW11/FLNA/TNFSF10/ZDHHC17/MAP3K3/PLK2/SLC44A2/C18orf32/SUMO4/LTBR/TRIM59/TRIM8/ANGPT1/RORA/TNIP2/IRAK2/APOL3/TNFRSF19/ABL1/RELB/TRIM6/UNC5CL/MAPKBP1/RIPK1/IRF3/CHUK/DDX21/NEK6/TNIP1/NFKB2
BP	GO:0099173	postsynapse organization	127	0.420194	1.55224	0.00404859	0.0367905	0.0294045	1645	tags=24%, list=12%, signal=22%	SRGN/ZNF365/ARHGAP22/ITGB3/DLG4/LRRTM2/TANC2/EPHA4/EPHB2/LRFN4/WNT5A/STK38L/LRP4/NRP1/EFNA1/WNT7A/ITGA3/ITPKA/PTPRS/LRRC4/LRP8/GRIN2B/IGF1R/CDH2/NRP2/CDC42/APOE/DVL1/ZMYND8/DNM3/ARHGAP33
BP	GO:0043583	ear development	126	0.418779	1.55156	0.0018913	0.0209848	0.0167719	1848	tags=28%, list=14%, signal=24%	CTHRC1/PTK7/GLI3/EDNRA/PRRX1/TBX2/TWIST1/ZEB1/EPHA4/EPHB2/TGFB3/BCL2L11/WNT5A/SHH/OSR1/RPL38/WHRN/HESX1/GSDME/CEBPD/SDC4/MAF/LHFPL5/JAG1/DVL1/HES1/LRIG1/SOBP/SHROOM2/SLC4A7/ECE1/MAFB/PDZD7/CECR2/PI4KB
BP	GO:0008015	blood circulation	289	0.375108	1.55016	0.000175682	0.00337765	0.00269955	1638	tags=24%, list=12%, signal=22%	MMP2/POSTN/COL1A2/SCN4B/IRX3/HOPX/PRKG1/PDE3A/CORIN/GJA1/EDNRA/EMILIN1/SLC2A5/TBX2/CXCL12/FOXC2/HRH1/WNK4/C2CD4A/VSTM4/NPR3/CORO2B/ZEB2/FOXC1/RGS4/DRD1/SERPING1/TGFB1/KCNE5/ADRA1B/RASL10B/TRPC1/ADAMTS16/C2CD4B/KCND3/SLC4A3/ITGA1/COL4A3/SOD2/ZC3H12A/PDE4D/P2RY2/FGG/ADRA1D/VEGFB/CRP/GAS6/KCNMB4/SPX/SCNN1A/PDGFB/EMILIN2/FGA/AGTRAP/AGTR1/FGB/NPR2/CDC42/DMPK/GUCY1B1/APOE/FERMT2/DOCK4/EXT1/PPARG/ASB3/E…
BP	GO:0030178	negative regulation of Wnt signaling pathway	127	0.418786	1.54704	0.00453047	0.0399724	0.0319475	3505	tags=45%, list=27%, signal=33%	CTHRC1/DACT1/GLI3/WIF1/DRAXIN/CXXC4/MDFI/GLI1/TLE3/WNT11/WNT5A/SHH/LRP4/SNAI2/DKK3/IGFBP1/IGFBP4/KREMEN1/CTNNB1/CDH2/TRABD2B/EGR1/TLE4/APOE/RNF213/WWTR1/FERMT1/HMGXB4/NHERF1/FZD6/MCC/RBMS3/NKD1/BMP2/LMBR1L/CTNND1/GRB10/IFT80/LRP1/LATS1/C12orf43/FUZ/MDK/FZD1/LZTS2/CHD8/PTPRU/RBX1/MAD2L2/NOTCH1/FRMD8/PRKN/CYLD/DAB2/LATS2/AMFR/TCF7L2
BP	GO:0061061	muscle structure development	461	0.35879	1.54397	2.32372e-05	0.000659805	0.000527342	2262	tags=26%, list=17%, signal=22%	LAMA2/IRX3/HOPX/PDGFRB/EFEMP2/PRKG1/EDNRA/PDGFRA/TMEM204/COL6A3/MYL9/CTF1/SGCA/TAGLN/MEF2C/TBX2/RANBP3L/FLNC/MYL11/FOXC2/PDLIM4/TNFSF14/TWIST1/IGF2/IGFBP5/LOX/ZEB1/STAC3/BASP1/DNER/FHOD3/ALPK3/ENG/POU4F1/FOXC1/RGS4/NFATC1/MMP14/TNNT1/TGFB1/NID1/WNT5A/POU6F1/WNT5B/SHH/MYOM1/HIVEP3/SOD2/ETV1/CHKB/ITGB1/LARGE1/DOCK2/ANKRD23/LGALS1/MTLN/IL4R/PDGFB/CTNNB1/ZBED6/CDH2/ADAMTS15/EGR1/CDON/TGFBR1/EGR2/SMAR…
BP	GO:0060828	regulation of canonical Wnt signaling pathway	201	0.387664	1.54377	0.00205019	0.0219115	0.0175126	2422	tags=25%, list=18%, signal=21%	CTHRC1/PTK7/DAAM2/DACT1/COL1A1/ADGRA2/GLI3/DRAXIN/GLI1/PLEKHA4/ZEB2/TGFB1/TLE3/WNT11/WNT5A/SHH/LRP4/SNAI2/LRRK1/DKK3/IGFBP1/CDH3/IGFBP4/KREMEN1/SULF2/CTNNB1/CDH2/EGR1/TLE4/APOE/CCAR2/SMAD3/WWTR1/FERMT1/TBL1XR1/CSNK1G2/DAPK3/NHERF1/FZD6/MCC/CAPRIN2/RBMS3/NKD1/BMP2/LMBR1L/CTNND1/RNF146/CTDNEP1/CSNK1D/TRPM4
BP	GO:0022604	regulation of cell morphogenesis	185	0.392852	1.5431	0.00141763	0.0170086	0.013594	2384	tags=26%, list=18%, signal=22%	PDPN/SYT1/LPAR1/SPARC/STRIP2/EFNA5/BCL11A/DLG4/PLXND1/EPHA4/EPHB2/PLXNC1/WNT5A/FN1/CCL2/ITPKA/AGO4/LRP8/ZNF135/CDC42SE1/ATP10A/ARHGEF18/PLEKHO1/MUL1/WTIP/DVL1/SMURF1/FERMT2/C15orf62/MSN/DNMBP/FGD5/MYO10/PLXNA1/MYO9A/MECP2/OBSL1/DAPK3/PLXNB2/FGD1/WDPCP/NHERF1/CAPRIN2/PARP6/DBN1/PARVA/SLC23A2/PLXNB1
BP	GO:0007159	leukocyte cell-cell adhesion	239	0.381895	1.5423	0.000550161	0.00806633	0.00644693	1759	tags=24%, list=13%, signal=21%	THY1/SOCS1/GLI3/IL1B/IL1A/CERCAM/ITGAL/CXCL12/LRRC32/LAG3/TNFSF14/ICAM1/ITPKB/IGF2/HAS2/IL7/FERMT3/CARD11/ITGA5/RAC2/KLHL25/ST3GAL4/SHH/APOA4/IL2RG/PECAM1/ZC3H12A/NFKBIZ/GLI2/CCL2/CEBPB/ITGB1/ETS1/RUNX1/MAP3K8/LGALS1/IL4R/IL6ST/PELI1/LRG1/CD74/SLC7A1/VAV1/SDC4/CD276/SMARCD3/GOLPH3/JAK3/TWSG1/SMARCE1/HES1/EXT1/MSN/IRF1/EFNB2/HLX/IL12A/NFAT5
BP	GO:0043473	pigmentation	95	0.435124	1.54213	0.00407549	0.0369868	0.0295613	2281	tags=24%, list=17%, signal=20%	TYRP1/GLI3/EDNRA/MC1R/MEF2C/TBX2/ZEB2/ADAMTS9/BCL2L11/SOD2/SNAI2/CDH3/BACE2/APOE/HPS4/MYO5A/SHROOM2/BLOC1S3/RAB27A/DCTN1/HPS3/BLOC1S1/BBS5
BP	GO:0055001	muscle cell development	114	0.422902	1.54191	0.00427985	0.0382937	0.0306058	956	tags=16%, list=7%, signal=15%	PDGFRB/EFEMP2/PRKG1/EDNRA/PDGFRA/MYL9/FLNC/LOX/STAC3/DNER/FHOD3/ALPK3/ENG/RGS4/TNNT1/ITGB1/LARGE1/ANKRD23
CC	GO:0001726	ruffle	149	0.406335	1.54044	0.00347076	0.0326009	0.0260559	2353	tags=26%, list=18%, signal=21%	PDPN/FAP/JCAD/LAYN/WIPF1/ITGB3/ITGA5/CSPG4/ARAP3/TLR4/ITGB1/ADAM17/PPP1R9B/ITGAV/PLEKHO1/SPRY4/PDE4A/CYTH3/MYO5A/FSCN1/S100A11/PDLIM7/TMEM87A/FERMT1/FGD5/PSD4/MYO10/MYO9B/PIP5K1A/FGD1/IQGAP1/TLN1/NHERF1/APPL2/MYADM/ACTN1/PODXL/KLHL2
BP	GO:0051896	regulation of phosphatidylinositol 3-kinase/protein kinase B signal transduction	147	0.407562	1.53564	0.00283987	0.0283509	0.0226592	1580	tags=20%, list=12%, signal=18%	DCN/CHI3L1/PDGFRB/PDGFRA/DDR2/MC1R/TWIST1/IGF2/IGFBP5/ENG/TGFB1/FBXL2/AXL/MEIS3/FN1/PTPN13/ITGB1/RCN3/GAS6/PDGFB/IGF1R/TGFBR1/F3/MUL1/HCST/THBS1/CBL/FERMT2/TSPYL5/SH2B3
CC	GO:0005911	cell-cell junction	371	0.365361	1.53472	9.64116e-05	0.00208962	0.0016701	1773	tags=21%, list=13%, signal=19%	AMTN/SCN4B/VANGL2/PLXDC1/PTK7/MXRA8/SV2A/GJA1/CDH11/TMEM204/HMCN1/SGCA/JCAD/EFNA5/ITGB3/PDLIM4/DLG4/WNK4/FMN1/CLDN11/PLEKHG5/EPHA4/PKP1/NECTIN4/ITGA5/FLRT2/NHS/FRMD6/KIFC3/RASIP1/PECAM1/ESAM/ITGB1/KIRREL1/RND1/CDH6/LIMS2/CLDN14/PMP22/CDH3/PRKCH/AQP3/ANKRD23/PLPP3/FRMD4A/CTNNB1/SLC2A1/ABCB4/CDH2/VAV1/LLGL1/AMOTL1/TGFBR1/ADAM17/PPP1R9B/CDC42/LAT/NPHP1/JAG1/WTIP/DSG3/CYTH3/FERMT2/LAMA3/FSCN1/MSN/VCL…
BP	GO:0010811	positive regulation of cell-substrate adhesion	99	0.429421	1.53392	0.00613245	0.0489124	0.0390928	2014	tags=33%, list=15%, signal=28%	COL8A1/THY1/EFEMP2/EMILIN1/PREX1/ITGB3/CCDC80/FMN1/HAS2/ITGA5/COL16A1/CSF1/NID1/FN1/NRP1/FGG/ITGA3/ABI3BP/LIMS2/PDGFB/FGA/RIN2/SDC4/FGB/CDC42/WNT4/FERMT2/EDIL3/SMAD3/FERMT1/FLNA/MAP4K4/FUT1
BP	GO:0048588	developmental cell growth	155	0.400909	1.53128	0.00165827	0.0189383	0.0151363	2102	tags=27%, list=16%, signal=23%	POSTN/SYT1/PRKG1/EDNRA/EFNA5/CXCL12/DRAXIN/BCL11A/SEMA4B/RGS4/WNT5A/FN1/NRP1/ITGB1/PTPRS/SPP1/CTNNB1/ULK2/NRP2/ZFYVE27/NPR2/ULK1/APOE/MUL1/DVL1/SMURF1/TRPC5/SRF/EXT1/IST1/VCL/MEX3C/RARG/SEMA4C/FOXP1/PLXNA1/RUFY3/MECP2/FLRT3/SEMA3C/IQGAP1/NGF
BP	GO:0042110	T cell activation	334	0.366622	1.52609	0.000174259	0.00335954	0.00268507	2093	tags=23%, list=16%, signal=20%	THY1/SOCS1/SOCS3/GLI3/IL1B/IL1A/ITGAL/PREX1/RUNX2/LRRC32/LAG3/TNFSF14/ICAM1/ITPKB/SLAMF7/IGF2/ZEB1/IL7/BCL3/CARD11/RAC2/TGFB1/JUNB/KLHL25/USP44/PRDM1/SHH/IL2RG/ZC3H12A/NFKBIZ/GLI2/FOSL2/CCL2/CEBPB/SH2D2A/RUNX1/DOCK2/MAP3K8/LGALS1/IL4R/IL6ST/PELI1/CTNNB1/CD74/SLC7A1/VAV1/EGR1/SDC4/CD276/ADAM17/SMARCD3/IL18R1/JAK3/ZFP36L1/LAT/WNT4/TWSG1/SMARCE1/HES1/STAT3/SRF/MSN/MAFB/IRF1/EFNB2/SMAD3/FOXP1/HLX/IL1…
BP	GO:0042692	muscle cell differentiation	270	0.373866	1.52348	0.000558956	0.00814396	0.00650898	1802	tags=23%, list=14%, signal=20%	LAMA2/IRX3/HOPX/PDGFRB/EFEMP2/PRKG1/EDNRA/PDGFRA/TMEM204/MYL9/MEF2C/TBX2/FLNC/TNFSF14/IGF2/IGFBP5/LOX/ZEB1/STAC3/DNER/FHOD3/ALPK3/ENG/RGS4/NFATC1/MMP14/TNNT1/TGFB1/NID1/WNT5B/SHH/SOD2/ITGB1/LARGE1/DOCK2/ANKRD23/MTLN/IL4R/PDGFB/CTNNB1/ZBED6/CDH2/ADAMTS15/CDON/SMARCD3/ADAM12/PLEKHO1/DMPK/WNT4/MRTFA/HES1/RBM4/SRF/MEF2A/EHD2/SEMA4C/EFNB2/ACVR1/FOXP1/SELENON/SLC9A1/PLEC
BP	GO:1903131	mononuclear cell differentiation	298	0.367831	1.52194	0.000319924	0.00538013	0.00430001	1736	tags=22%, list=13%, signal=20%	SOCS1/SOCS3/GLI3/IL1B/IL1A/IFI16/CTSK/PREX1/RUNX2/LAG3/ITPKB/ZEB1/IL7/BCL3/NFATC1/MMP14/CARD11/TGFB1/JUNB/CSF1/TMEM176A/KLHL25/USP44/ITGB6/PRDM1/SHH/AXL/TYRO3/IL2RG/ZC3H12A/NFKBIZ/GLI2/FOSL2/DHRS2/CEBPB/ITGB1/RUNX1/DOCK2/TMEM176B/GAS6/IL11/LGALS1/IL4R/CTNNB1/CD74/VAV1/EGR1/IRF8/ADAM17/SMARCD3/FOS/IL15RA/IL18R1/JAK3/ZFP36L1/WNT4/SMARCE1/CLCF1/STAT3/SRF/PPARG/MAFB/IRF1/ITGB8/FOXP1/HLX
BP	GO:0070482	response to oxygen levels	249	0.3738	1.52114	0.000779429	0.010666	0.00852466	1560	tags=18%, list=12%, signal=17%	PDPN/MMP2/POSTN/LPAR1/PLAT/COL1A1/EDNRA/DDR2/IL1A/NDP/CXCL12/SLC29A1/TWIST1/DIO3/ANGPTL4/ZEB2/EGLN2/CA9/EPHA4/HIF1A/MMP14/TGFB1/GUCY1A2/TGFB3/PLAU/SOD2/FOSL2/PLOD2/VEGFB/AQP3/SLC2A1/EGR1/AGTRAP/ADAM17/FOS/ZFP36L1/GUCY1B1/LOXL2/DDIT4/THBS1/WTIP/CBL/ANGPT2/PLOD1/SRF/PPARG
BP	GO:0002521	leukocyte differentiation	389	0.358613	1.51759	8.95364e-05	0.00195885	0.00156559	1736	tags=21%, list=13%, signal=19%	SOCS1/SOCS3/GLI3/IL1B/IL1A/NDP/IFI16/CCR1/CTSK/LRRC17/PREX1/FBN1/RUNX2/LAG3/SIGLEC15/ITPKB/SNX10/ZEB1/TSPAN2/POU4F1/IL7/BCL3/NFATC1/MMP14/CARD11/TGFB1/JUNB/CSF1/TMEM176A/KLHL25/USP44/ITGB6/PRDM1/SHH/AXL/TYRO3/IL2RG/ZC3H12A/NFKBIZ/GLI2/FOSL2/DHRS2/TLR4/CEBPB/ITGB1/LRRK1/RUNX1/LARGE1/CD109/DOCK2/TMEM176B/GAS6/IL11/LGALS1/IL4R/CTNNB1/CD74/VAV1/EGR1/IRF8/ADAM17/SMARCD3/FOS/IL15RA/IL18R1/FSTL3/JAK3/ZF…
BP	GO:0045664	regulation of neuron differentiation	115	0.416666	1.51564	0.00602999	0.0482607	0.0385718	2102	tags=27%, list=16%, signal=23%	IRX3/DUOXA1/BEND6/GLI3/MEF2C/CXCL12/BCL11A/ZEB1/GDF7/NOTCH3/SOCS2/SHH/TCF4/ITGB1/EFNA3/CDON/GDF11/PAX6/NREP/RAP1GAP/JAG1/HES1/TRPC5/NBL1/ADRA2C/METTL14/CDK5RAP3/MMD/SHOC2/RARA/NGF
BP	GO:0001819	positive regulation of cytokine production	272	0.370271	1.51546	0.000287113	0.00489916	0.00391561	2093	tags=24%, list=16%, signal=20%	POSTN/CHI3L1/PAEP/IL1B/IL1A/IFI16/LUM/AFAP1L2/TWIST1/TLR5/PLA2R1/NOD1/IL7/LBP/BCL3/HIF1A/CARD11/EPHB2/TGFB1/LY96/IL1R1/SPHK1/WNT11/WNT5A/TICAM2/SULF1/ORM1/PDE4D/TLR4/CEBPB/TRAF2/HK1/RUNX1/SERPINE1/SULF2/IL4R/IL6ST/PELI1/AGPAT2/CD74/EGR1/IRF8/CD276/ADAM17/IL18R1/F3/POLR3D/THBS1/STAT3/IRF1/SMAD3/FOXP1/IL12A/INAVA/FERMT1/IKBKE/CD40/IL17RC/PLCB1/CGAS/C3/PIK3CD/LACC1/RARA
BP	GO:1902074	response to salt	224	0.377784	1.51453	0.000853953	0.0114831	0.00917776	2122	tags=27%, list=16%, signal=23%	SYT1/COL1A1/EDNRA/IL1B/IL1A/MEF2C/RUNX2/SLC13A5/BCL11A/ITPKB/CPNE7/DLG4/TGM2/RGS4/DRD1/ALOX5AP/JUNB/TRPC1/WNT5A/SHH/SYT12/SOD2/ZC3H12A/P2RY2/FGG/CIB2/ITPKA/LRP11/LARGE1/KCNMB4/AQP3/GIPR/PDGFB/IGF1R/FGA/ADCY7/KCNC1/EGR1/ALPL/FGB/FOS/PPP1R9B/NPR2/PTCH1/THBS1/ITPKC/FOSB/MEF2A/MYRF/PLEC/PKD2/NEK7/MECP2/ATP2B4/PLCB1/LYPD1/MTHFR/IQGAP1/ANKH/SYT11/HOMER1
BP	GO:0043122	regulation of canonical NF-kappaB signal transduction	211	0.379389	1.51273	0.00131125	0.0160266	0.0128091	2894	tags=27%, list=22%, signal=21%	LPAR1/PELI2/GJA1/IL1B/IL1A/TRAF5/NOD1/PLEKHG5/CARD11/UBE2V1/WNT5A/TICAM2/ZC3H12A/TLR4/TRAF2/LGALS1/PELI1/CTNNB1/TIFA/CD74/ALPK1/SLC20A1/MUL1/TRIM68/TNFAIP3/INAVA/IKBKB/IKBKE/CD40/FBXW11/FLNA/TNFSF10/ZDHHC17/MAP3K3/PLK2/SLC44A2/C18orf32/SUMO4/LTBR/TRIM59/TRIM8/ANGPT1/RORA/TNIP2/APOL3/TNFRSF19/ABL1/TRIM6/UNC5CL/MAPKBP1/RIPK1/IRF3/CHUK/DDX21/NEK6/TNIP1
BP	GO:0090090	negative regulation of canonical Wnt signaling pathway	103	0.421344	1.51198	0.00587144	0.0475369	0.0379934	3505	tags=46%, list=27%, signal=34%	CTHRC1/DACT1/GLI3/DRAXIN/GLI1/TLE3/WNT11/WNT5A/SHH/LRP4/SNAI2/DKK3/IGFBP1/IGFBP4/KREMEN1/CTNNB1/CDH2/EGR1/TLE4/APOE/WWTR1/FERMT1/NHERF1/FZD6/MCC/RBMS3/NKD1/BMP2/LMBR1L/CTNND1/LATS1/FUZ/MDK/FZD1/LZTS2/CHD8/PTPRU/RBX1/MAD2L2/NOTCH1/FRMD8/PRKN/CYLD/DAB2/LATS2/AMFR/TCF7L2
BP	GO:0045055	regulated exocytosis	126	0.407894	1.51123	0.00362948	0.0336837	0.0269213	2180	tags=23%, list=16%, signal=19%	SYT1/PTGDS/SYP/SV2A/RAB31/RIMS3/STX1A/DOC2A/RAC2/SNAP25/ABCA12/PRRT2/SYT12/STX11/WNT7A/NAPB/IL4R/LAT/DVL1/CBL/LAT2/RAB15/STXBP1/RAB27A/RABGEF1/BAIAP3/PIK3CD/SYT11/STX2
BP	GO:0045216	cell-cell junction organization	153	0.396643	1.50922	0.0021392	0.0226892	0.0181341	1802	tags=26%, list=14%, signal=23%	IRX3/HOPX/GJA1/IL1B/CDH11/SNAI1/CLDN11/EPHA4/PKP1/EPHB2/TGFB1/TGFB3/WNT11/KIFC3/PECAM1/ESAM/SNAI2/KIRREL1/WHRN/CDH6/LIMS2/CLDN14/CDH3/PRKCH/CTNNB1/CDH2/NUMBL/TGFBR1/CDC42/NPHP1/FERMT2/FSCN1/SRF/EXT1/VCL/EFNB2/SMAD3/INAVA/IKBKB/PLEC
BP	GO:0050767	regulation of neurogenesis	254	0.368392	1.5072	0.00105225	0.0135242	0.0108091	2400	tags=30%, list=18%, signal=25%	DAAM2/THY1/GLI3/IL1B/ZNF365/GRM5/EFNA5/CXCL12/DRAXIN/PLXND1/TGM2/SEMA4B/POU4F1/EPHA4/HIF1A/EPHB2/HAPLN3/PLXNC1/TGFB1/WNT5A/SHH/LRP4/FN1/NRP1/WNT7A/CDKN2B/RASSF10/ITGB1/ITPKA/PTPRS/SPP1/PRKCH/LRP8/IL6ST/CTNNB1/PLAG1/ULK2/CDON/ASPA/KIFAP3/ZFYVE27/NUMBL/EGR2/SMARCD3/PAX6/ULK1/SMURF1/HES1/CLCF1/TRPC5/SRF/IST1/PER2/SERPINE2/SEMA4C/MYRF/PLXNA1/RUFY3/BHLHE40/ROBO1/PRUNE1/MECP2/OBSL1/PLXNB2/SEMA3C/NGF/AP…
BP	GO:0050807	regulation of synapse organization	144	0.39838	1.50568	0.00503106	0.0430927	0.0344414	1645	tags=26%, list=12%, signal=23%	SRGN/ICAM5/MEF2C/ARHGAP22/EFNA5/THBS2/NEGR1/AMIGO2/LRRTM2/TANC2/EPHA4/EPHB2/PLXNC1/SNAP25/LRFN4/FLRT2/WNT5A/LRP4/EFNA1/WNT7A/PTPN13/C1QL1/ITGB1/ITPKA/PTPRS/LRP8/GRIN2B/CTNNB1/CDH2/NRP2/CLN3/CDC42/DMPK/APOE/DVL1/ZMYND8/DNM3/ARHGAP33
BP	GO:0050769	positive regulation of neurogenesis	161	0.391271	1.50442	0.00272448	0.0275169	0.0219926	2384	tags=33%, list=18%, signal=27%	GLI3/IL1B/ZNF365/GRM5/EFNA5/CXCL12/PLXND1/TGM2/EPHA4/HIF1A/EPHB2/HAPLN3/PLXNC1/TGFB1/SHH/FN1/NRP1/RASSF10/ITGB1/ITPKA/PRKCH/LRP8/IL6ST/CTNNB1/PLAG1/CDON/ASPA/ZFYVE27/NUMBL/EGR2/SMARCD3/PAX6/SMURF1/HES1/CLCF1/TRPC5/SRF/IST1/SERPINE2/MYRF/PLXNA1/RUFY3/ROBO1/MECP2/OBSL1/PLXNB2/NGF/CAPRIN2/PARP6/BMP2/DBN1/BMPR2/PLXNB1
BP	GO:0051960	regulation of nervous system development	290	0.362986	1.50332	0.000954353	0.0125668	0.0100439	2400	tags=30%, list=18%, signal=25%	DAAM2/THY1/GLI3/IL1B/ZNF365/GRM5/EFNA5/THBS2/CXCL12/DRAXIN/AMIGO2/PLXND1/TGM2/SEMA4B/POU4F1/LRRTM2/EPHA4/HIF1A/EPHB2/HAPLN3/PLXNC1/TGFB1/FLRT2/WNT5A/SHH/LRP4/FN1/NRP1/WNT7A/PTPN13/CDKN2B/RASSF10/ITGB1/TYMP/ITPKA/PTPRS/SPP1/PRKCH/LRP8/IL6ST/CTNNB1/PLAG1/ULK2/CDON/ASPA/KIFAP3/ZFYVE27/NUMBL/EGR2/SMARCD3/PAX6/ULK1/SMURF1/HES1/CLCF1/TRPC5/SRF/IST1/PER2/SERPINE2/RARG/SEMA4C/MYRF/PLXNA1/RUFY3/BHLHE40/RO…
BP	GO:0043491	phosphatidylinositol 3-kinase/protein kinase B signal transduction	180	0.386062	1.50189	0.00210532	0.0223979	0.0179013	1580	tags=20%, list=12%, signal=18%	DCN/CHI3L1/PDGFRB/PDGFRA/DDR2/NDP/MC1R/TWIST1/IGF2/IGFBP5/LOX/ENG/TGFB1/FBXL2/AXL/MEIS3/TYRO3/FN1/PTPN13/ITGB1/RCN3/GAS6/ATG14/PDGFB/IGF1R/TGFBR1/ZFP36L1/F3/MUL1/HCST/THBS1/CBL/FERMT2/TSPYL5/STAT3/SH2B3
BP	GO:0051251	positive regulation of lymphocyte activation	203	0.376036	1.5	0.00226108	0.0236583	0.0189086	2269	tags=27%, list=17%, signal=22%	THY1/SOCS1/GLI3/IL1B/IL1A/MEF2C/TNFSF14/ITPKB/IGF2/IL7/MMP14/CARD11/EPHB2/TGFB1/KLHL25/SHH/AXL/IL2RG/TICAM2/NFKBIZ/GLI2/CCL2/TLR4/RUNX1/GAS6/MAP3K8/LGALS1/IL4R/IL6ST/PELI1/CD74/SLC7A1/VAV1/CD276/SMARCD3/SLC39A10/IL15RA/SMARCE1/HES1/CLCF1/BLOC1S3/EFNB2/HLX/IL12A/CD40/DOCK8/EGR3/TP53BP1/SMARCD1/RARA/CDKN1A/ZBTB1/FLOT2/CSK
BP	GO:0098742	cell-cell adhesion via plasma-membrane adhesion molecules	135	0.40199	1.49805	0.00567476	0.046648	0.037283	2166	tags=37%, list=16%, signal=31%	PTK7/SCARF2/CDH11/HMCN1/ITGAL/SPARCL1/EFNA5/ICAM1/AMIGO2/CLDN11/PCDHGA8/NECTIN4/ITGA5/CELSR1/FAT3/PCDHGB7/LRFN4/PCDH7/ROBO3/PECAM1/ESAM/ITGA3/ITGB1/CDH6/CLDN14/IL1RN/PCDHGB4/PTPRS/CDH3/LRRC4/PCDHGA9/CDH2/KIFAP3/EMB/PCDHGA5/PCDHGB5/CELSR2/DSG3/PCDHGA7/PCDHGB6/ACVR1/CADM4/ROBO1/CLSTN1/FLRT3/PLXNB2/PCDHGA12/PTPRF/CADM2/GPC4
CC	GO:0009986	cell surface	467	0.347613	1.49786	6.63708e-05	0.00155437	0.00124231	1394	tags=22%, list=11%, signal=20%	LPAR1/PLAT/DUOX2/THY1/ANTXR1/SPARC/FAP/PXDN/CD248/CRLF1/MXRA8/ADGRA2/HHIP/CORIN/ITGBL1/PDGFRA/IL1A/NDP/CCR1/ACKR2/CTSK/ITGAL/DUOX1/BGN/EFNA5/LAYN/WIF1/CXCL12/LRRC32/ITGB3/LAG3/ICAM1/SLAMF7/COLEC11/PLA2R1/OSMR/ENG/LBP/EPHA4/ADAMTS9/EPHB2/ITGA5/CSPG4/TGFB1/TGFB3/LRFN4/IL1R1/NOTCH3/ITGB6/SLC4A3/ITGA1/WNT5A/GPC6/SHH/APOA4/AXL/PLAU/ITGA10/TYRO3/IL2RG/LRP4/SULF1/LIFR/WNT7A/FGG/TLR4/ADAMTS7/ITGA3/ITGB1/…
CC	GO:0098794	postsynapse	369	0.35613	1.49786	0.000172134	0.00332776	0.00265968	1982	tags=21%, list=15%, signal=18%	LPAR1/LAMA2/KCTD12/SRGN/KCTD16/MEF2C/GRM5/BAALC/KCNC2/SH2D5/BCL11A/ITGB3/PDLIM4/SLC29A1/DLG4/IGF2BP1/CNIH3/SEMA4B/LRRTM2/DRD1/TANC2/EPHA4/EPHB2/ITGA5/SNAP25/LRFN4/RPS27/PRRT2/MAGEE1/KCND3/WNT5A/SLC1A7/LRP4/NRP1/ITGA3/RPL38/SORCS3/ITGB1/ITPKA/CHRNE/PTPRS/LRRC4/GRIN2B/GABRB3/CTNNB1/KCNC1/CDH2/NRP2/SPOCK1/PPP1R9B/SSPN/HCN1/CDC42/AP2B1/DVL1/ZMYND8/DNM3/NCDN/HOMER3/ARHGAP33/DNAJB1/SEMA4C/EFNB2/CAMK2N1…
BP	GO:0050920	regulation of chemotaxis	129	0.402838	1.49673	0.0058998	0.0476559	0.0380885	1866	tags=29%, list=14%, signal=26%	LPAR1/PDGFRB/ADGRA2/PDGFRA/CCR1/CXCL12/TNFSF14/SEMA4B/LBP/RAC2/TGFB1/CSF1/WNT5A/ROBO3/NRP1/CCL2/FGF1/VEGFB/CAMK1D/GAS6/SERPINE1/PDGFB/CD74/MTUS1/ADAM17/SLC8B1/F3/THBS1/ANGPT2/CXCL8/SEMA4C/EFNB2/SMAD3/NBL1/IL12A/SCG2/S1PR1/ROBO1
BP	GO:0060537	muscle tissue development	270	0.366838	1.49484	0.000976654	0.0128122	0.01024	2122	tags=26%, list=16%, signal=22%	IRX3/HOPX/PDGFRB/EFEMP2/PRKG1/GJA1/EDNRA/PDGFRA/MEF2C/TBX2/MYL11/FOXC2/TWIST1/IGF2/IGFBP5/LOX/GLI1/STAC3/DNER/FHOD3/ALPK3/ENG/POU4F1/FOXC1/RGS4/ADAMTS9/TGFB1/WNT5A/SHH/MYOM1/HIVEP3/OSR1/FOSL2/ITGB1/RUNX1/LARGE1/CTNNB1/EGR1/CDON/TGFBR1/EGR2/FOS/NPR2/CDC42/PTCH1/SRF/SVIL/MEF2A/EFNB2/SMAD3/ACVR1/FOXP1/SELENON/HLX/SLC9A1/PLEC/UQCC2/PKD2/S1PR1/SYNE1/EYA2/OBSL1/JARID2/DIPK2A/SEMA3C/NIBAN2/FLCN/RARA/HOM…
MF	GO:0001228	DNA-binding transcription activator activity, RNA polymerase II-specific	286	0.362055	1.49141	0.00102033	0.0131868	0.0105394	2948	tags=34%, list=22%, signal=27%	IRX3/PRRX1/MEF2C/CREB3L1/RUNX2/FOXC2/MYCN/SALL2/GLI1/MECOM/HOXB2/POU4F1/FOXC1/NFATC1/HIF1A/JUNB/KLF7/MEIS3/ELK3/ZNF841/ETV1/FOSL2/CEBPB/TCF4/ETS1/RUNX1/ZNF208/TEF/ZNF212/CEBPD/TP63/ZNF836/PLAG1/FOXD2/ZNF227/EGR1/PLAGL1/ZNF225/EGR2/FOS/ZNF107/PAX6/ZNF585A/ZNF808/MAF/ZNF658/CREB3L3/ETV6/STAT3/SRF/ZNF319/FOSB/ZFAT/MEF2A/MAFB/IRF1/SMAD3/TBX19/NFAT5/PBX3/GLIS3/ZNF473/ZNF292/ELF4/ZNF615/PLSCR1/EGR3/GTF…
BP	GO:1903706	regulation of hemopoiesis	264	0.363317	1.48875	0.00120007	0.0149559	0.0119533	1736	tags=21%, list=13%, signal=19%	SOCS1/GLI3/CCR1/LRRC17/MEF2C/H4C5/FBN1/LAG3/SIGLEC15/ITPKB/LOX/ZEB1/POU4F1/IL7/HIF1A/MMP14/CARD11/TGFB1/JUNB/CSF1/TMEM176A/KLHL25/PRDM1/SHH/AXL/IL2RG/ZC3H12A/NFKBIZ/GLI2/TLR4/H4C3/CEBPB/SNAI2/ETS1/RUNX1/TMEM176B/GAS6/IL4R/TSC22D1/CTNNB1/CD74/H4C16/SMARCD3/FOS/IL15RA/FSTL3/JAK3/ZFP36L1/JAG1/SMARCE1/STAT3/MAFB/RARG/IRF1/FOXP1/HLX
BP	GO:0050803	regulation of synapse structure or activity	146	0.394183	1.48667	0.00523514	0.044179	0.0353096	1645	tags=26%, list=12%, signal=23%	SRGN/ICAM5/MEF2C/ARHGAP22/EFNA5/THBS2/NEGR1/AMIGO2/LRRTM2/TANC2/EPHA4/EPHB2/PLXNC1/SNAP25/LRFN4/FLRT2/WNT5A/LRP4/EFNA1/WNT7A/PTPN13/C1QL1/ITGB1/ITPKA/PTPRS/LRP8/GRIN2B/CTNNB1/CDH2/NRP2/CLN3/CDC42/DMPK/APOE/DVL1/ZMYND8/DNM3/ARHGAP33
BP	GO:1904019	epithelial cell apoptotic process	94	0.421818	1.48628	0.00607981	0.0486037	0.038846	3506	tags=47%, list=27%, signal=35%	CD248/EDNRA/ITGB3/ICAM1/PLA2R1/ANGPTL4/TGFB1/WNT11/COL4A3/NFKBIZ/FGG/CCL2/TMEM258/GAS6/SERPINE1/IGF1R/FGA/FGB/ZFP36L1/THBS1/TNFAIP3/SCG2/CD40/ANGPT1/TNIP2/CARM1/BMPR2/DNMT3A/USP53/ABL1/PLCG1/ZFP36/MDK/ATF2/ADAR/NPC1/SRSF6/PRKAA1/CASP3/TIA1/MAPK7/ANO6/TCF7L2/NUPR1
MF	GO:0005509	calcium ion binding	378	0.352523	1.48312	0.000125394	0.00263237	0.0021039	1467	tags=20%, list=11%, signal=18%	MGP/SYT1/DUOX2/SPARC/FSTL1/CD248/EFEMP2/CDH11/LTBP2/HMCN1/MYL9/SGCA/DUOX1/FBLN5/SPARCL1/FBN1/THBS2/MYL11/NID2/EFEMP1/C1S/COLEC11/DLK1/DNER/TGM2/FKBP10/PCDHGA8/CELSR1/FAT3/PCDHGB7/LRP1B/NOTCH3/NID1/PCDH7/PLSCR4/SHH/SYT12/LRP4/SULF1/LTBP1/CIB2/CDH6/CRP/NOTCH2NLC/RCN3/GAS6/PCDHGB4/CDH3/RASGRP3/SUSD1/LTBP4/LRP8/SULF2/PCDHGA9/CALML4/CDH2/HRNR/EFHB/ALPL/SPOCK1/PCDHGA5/PPP2R3A/EFCAB5/PCDHGB5/FBLN1/CELSR…
BP	GO:0031344	regulation of cell projection organization	471	0.34307	1.48048	0.000145385	0.00289897	0.00231698	2384	tags=24%, list=18%, signal=20%	PDPN/LPAR1/PTK7/DAAM2/THY1/DDR2/PRRX1/ZNF365/PREX1/EFNA5/CXCL12/DRAXIN/NEGR1/BCL11A/ICAM1/DLG4/PLXND1/SEMA4B/TANC2/EPHA4/EPHB2/RAC2/PLXNC1/FAT3/SNAP25/TGFB3/ADAMTS16/KNDC1/WNT5A/ROBO3/DZIP1/LRP4/ALKAL1/FN1/NRP1/EFNA1/WNT7A/ITGA3/ITPKA/NR2F1/CAMK1D/PMP22/PTPRS/SPP1/CROCC/KREMEN1/LRP8/PTPRG/DPYSL3/GRIN2B/IGF1R/KIF24/CDH2/ULK2/RTN4RL1/ZFYVE27/LIMK2/SPOCK1/TGFBR1/CLN3/PAX6/IL15RA/IFT140/CDC42/ULK1/AP…
BP	GO:0120035	regulation of plasma membrane bounded cell projection organization	458	0.343052	1.47973	8.15331e-05	0.00182964	0.00146232	2384	tags=24%, list=18%, signal=20%	PDPN/LPAR1/PTK7/DAAM2/THY1/DDR2/PRRX1/ZNF365/PREX1/EFNA5/CXCL12/DRAXIN/NEGR1/BCL11A/ICAM1/PLXND1/SEMA4B/TANC2/EPHA4/EPHB2/RAC2/PLXNC1/FAT3/SNAP25/TGFB3/ADAMTS16/KNDC1/WNT5A/ROBO3/DZIP1/LRP4/ALKAL1/FN1/NRP1/EFNA1/WNT7A/ITGA3/ITPKA/NR2F1/CAMK1D/PMP22/PTPRS/SPP1/CROCC/KREMEN1/LRP8/PTPRG/DPYSL3/GRIN2B/IGF1R/KIF24/CDH2/ULK2/RTN4RL1/ZFYVE27/LIMK2/SPOCK1/TGFBR1/CLN3/PAX6/IL15RA/IFT140/CDC42/ULK1/APOE/RA…
BP	GO:0006909	phagocytosis	155	0.385876	1.47386	0.00371504	0.0342953	0.0274102	1394	tags=23%, list=11%, signal=20%	IL1B/ICAM5/ITGAL/RAB31/ITGB3/COLEC11/TGM2/COLEC12/LBP/SPHK1/RAB34/NCF2/AXL/TYRO3/IL2RG/TICAM2/PECAM1/CCL2/TLR4/ITGB1/DOCK2/CAMK1D/CRP/GAS6/PLPP4/CDC42SE1/HAVCR1/VAV1/IRF8/CLN3/IL15RA/ITGAV/CDC42/PLD2/THBS1
BP	GO:0050804	modulation of chemical synaptic transmission	261	0.360071	1.47252	0.00205527	0.0219323	0.0175292	2122	tags=26%, list=16%, signal=22%	SYT1/PLAT/LAMA2/SRGN/SYP/IL1B/CDH11/MEF2C/GRM5/DLG4/SCTR/RASGRF1/HRH1/RIMS3/STX1A/LRRTM2/RGS4/DRD1/EPHA4/EPHB2/SNAP25/CACNA1A/PRRT2/WNT5A/NALCN/MAP1A/SYT12/WNT7A/CCL2/SORCS3/ITGB1/ITPKA/LARGE1/DNM1/PTPRS/KCNMB4/LRRC4/LRP8/TSHZ3/GRIN2B/CDH2/EGR2/CLN3/DMPK/GUCY1B1/APOE/RASGRF2/DVL1/ZMYND8/SRF/NCDN/SERPINE2/SLC38A2/SORCS2/STXBP1/SYNE1/CLSTN1/MECP2/SNX14/PLCB1/MTMR2/PLK2/BAIAP3/RARA/SYT11/NGF/HOMER1
BP	GO:0007268	chemical synaptic transmission	370	0.350218	1.47129	0.000261335	0.00457107	0.00365338	2122	tags=24%, list=16%, signal=21%	SYT1/PLAT/LAMA2/SRGN/SYP/SV2A/KCNN1/IL1B/CDH11/CACNB1/MEF2C/GRM5/PDLIM4/KIF5A/SLC29A1/DLG4/SCTR/RASGRF1/HRH1/STAC3/RIMS3/STX1A/LRRTM2/RGS4/DRD1/EPHA4/EPHB2/DOC2A/SNAP25/CACNA1A/PRRT2/WNT5A/GPR176/NALCN/MAP1A/SLC1A7/SYT12/STX11/WNT7A/CCL2/SORCS3/ITGB1/ITPKA/NAPB/LARGE1/DNM1/CHRNE/PMP22/PTPRS/KCNMB4/LRRC4/LRP8/TSHZ3/GRIN2B/FCHSD1/GABRB3/CTNNB1/CDH2/EGR2/CLN3/NPR2/DMPK/GUCY1B1/APOE/RASGRF2/DVL1/ZMYN…
BP	GO:0098916	anterograde trans-synaptic signaling	370	0.350218	1.47129	0.000261335	0.00457107	0.00365338	2122	tags=24%, list=16%, signal=21%	SYT1/PLAT/LAMA2/SRGN/SYP/SV2A/KCNN1/IL1B/CDH11/CACNB1/MEF2C/GRM5/PDLIM4/KIF5A/SLC29A1/DLG4/SCTR/RASGRF1/HRH1/STAC3/RIMS3/STX1A/LRRTM2/RGS4/DRD1/EPHA4/EPHB2/DOC2A/SNAP25/CACNA1A/PRRT2/WNT5A/GPR176/NALCN/MAP1A/SLC1A7/SYT12/STX11/WNT7A/CCL2/SORCS3/ITGB1/ITPKA/NAPB/LARGE1/DNM1/CHRNE/PMP22/PTPRS/KCNMB4/LRRC4/LRP8/TSHZ3/GRIN2B/FCHSD1/GABRB3/CTNNB1/CDH2/EGR2/CLN3/NPR2/DMPK/GUCY1B1/APOE/RASGRF2/DVL1/ZMYN…
BP	GO:0099537	trans-synaptic signaling	374	0.348257	1.46672	0.000329361	0.00545989	0.00436376	2122	tags=24%, list=16%, signal=21%	SYT1/PLAT/LAMA2/SRGN/SYP/SV2A/KCNN1/IL1B/CDH11/CACNB1/MEF2C/GRM5/PDLIM4/KIF5A/SLC29A1/DLG4/SCTR/RASGRF1/HRH1/STAC3/RIMS3/STX1A/LRRTM2/RGS4/DRD1/EPHA4/EPHB2/DOC2A/SNAP25/CACNA1A/PRRT2/WNT5A/GPR176/NALCN/MAP1A/SLC1A7/SYT12/STX11/WNT7A/CCL2/SORCS3/ITGB1/ITPKA/NAPB/LARGE1/DNM1/CHRNE/PMP22/PTPRS/KCNMB4/LRRC4/LRP8/TSHZ3/GRIN2B/FCHSD1/GABRB3/CTNNB1/CDH2/EGR2/CLN3/NPR2/DMPK/GUCY1B1/APOE/RASGRF2/DVL1/ZMYN…
BP	GO:1990138	neuron projection extension	116	0.400986	1.46568	0.00568787	0.0467007	0.0373251	2083	tags=27%, list=16%, signal=23%	POSTN/SYT1/EDNRA/CXCL12/DRAXIN/BCL11A/SEMA4B/WNT5A/FN1/NRP1/ITGB1/PTPRS/CTNNB1/ULK2/NRP2/ZFYVE27/ULK1/APOE/MUL1/DVL1/SMURF1/TRPC5/SRF/VCL/SEMA4C/PLXNA1/RUFY3/MECP2/FLRT3/SEMA3C/IQGAP1
BP	GO:0099177	regulation of trans-synaptic signaling	262	0.358134	1.46451	0.00136105	0.016491	0.0131802	2122	tags=26%, list=16%, signal=22%	SYT1/PLAT/LAMA2/SRGN/SYP/IL1B/CDH11/MEF2C/GRM5/DLG4/SCTR/RASGRF1/HRH1/RIMS3/STX1A/LRRTM2/RGS4/DRD1/EPHA4/EPHB2/SNAP25/CACNA1A/PRRT2/WNT5A/NALCN/MAP1A/SYT12/WNT7A/CCL2/SORCS3/ITGB1/ITPKA/LARGE1/DNM1/PTPRS/KCNMB4/LRRC4/LRP8/TSHZ3/GRIN2B/CDH2/EGR2/CLN3/DMPK/GUCY1B1/APOE/RASGRF2/DVL1/ZMYND8/SRF/NCDN/SERPINE2/SLC38A2/SORCS2/STXBP1/SYNE1/CLSTN1/MECP2/SNX14/PLCB1/MTMR2/PLK2/BAIAP3/RARA/SYT11/NGF/HOMER1
BP	GO:0007599	hemostasis	160	0.381757	1.46267	0.00532117	0.0446037	0.035649	1955	tags=29%, list=15%, signal=25%	PDPN/PLAT/FAP/PRKG1/EMILIN1/PDGFRA/MYL9/ITGB3/ENTPD1/FERMT3/EPHB2/SERPING1/ST3GAL4/ZNF385A/SHH/AXL/PLAU/TYRO3/FGG/TLR4/GAS6/SERPINE1/PDGFB/IL6ST/EMILIN2/FGA/VAV1/FGB/F3/FBLN1/APOE/HPS4/THBS1/SRF/SH2B3/TFPI2/VCL/BLOC1S3/SERPINE2/STXBP1/CD40/ADRA2C/RAB27A/FLNA/USF1/PLSCR1
BP	GO:0010720	positive regulation of cell development	288	0.354241	1.46193	0.00171624	0.0195075	0.0155912	2384	tags=28%, list=18%, signal=24%	SOCS1/PDE3A/GLI3/IL1B/CCR1/ZNF365/GRM5/EFNA5/CXCL12/ITPKB/PLXND1/TGM2/POU4F1/IL7/EPHA4/HIF1A/MMP14/EPHB2/HAPLN3/PLXNC1/TGFB1/CSF1/KLHL25/SHH/AXL/IL2RG/FN1/NFKBIZ/NRP1/GLI2/RASSF10/ITGB1/ITPKA/RUNX1/GAS6/PRKCH/LRP8/IL4R/IL6ST/CTNNB1/PLAG1/CD74/CDON/ASPA/ZFYVE27/NUMBL/EGR2/SMARCD3/FOS/PAX6/IL15RA/ZFP36L1/SMURF1/SMARCE1/HES1/CLCF1/TRPC5/SRF/IST1/SERPINE2/HLX/MYRF/PLXNA1/RUFY3/ROBO1/MECP2/OBSL1/EGR3/…
BP	GO:0070372	regulation of ERK1 and ERK2 cascade	177	0.375014	1.45958	0.00465038	0.0407713	0.032586	1458	tags=19%, list=11%, signal=17%	CHI3L1/PDGFRB/EMILIN1/IL1B/PDGFRA/IL1A/CCR1/ITGB3/ICAM1/NOD1/TIMP3/SPRED3/EPHA4/EPHB2/TGFB1/ALKAL1/FN1/NRP1/FGG/CCL2/TLR4/FGF1/GAS6/DNAJC27/PDGFB/FGA/CD74/FGB/FBLN1/APOE/SPRED1/FERMT2/CCL20
BP	GO:0003007	heart morphogenesis	174	0.374471	1.45546	0.00376617	0.0347214	0.0277507	1921	tags=25%, list=15%, signal=21%	VANGL2/EDNRA/COL5A1/SNAI1/MEF2C/TBX2/FOXC2/ADAMTS1/TWIST1/PLXND1/HAS2/ENG/POU4F1/FOXC1/HIF1A/TGFB1/WNT11/FLRT2/WNT5A/SHH/DNAH11/NRP1/EFNA1/SNAI2/CTNNB1/NRP2/TGFBR1/SMARCD3/CDC42/JAG1/PTCH1/DVL1/HES1/SRF/EXT1/SMAD3/ACVR1/TBX19/PKD2/S1PR1/ROBO1/FLNA/TEAD2
BP	GO:0007517	muscle organ development	219	0.362771	1.45138	0.00354358	0.0330623	0.0264247	2122	tags=24%, list=16%, signal=20%	LAMA2/EFEMP2/EDNRA/COL6A3/CTF1/SGCA/TAGLN/MEF2C/MYL11/FOXC2/TWIST1/IGF2/LOX/STAC3/BASP1/DNER/ENG/POU4F1/FOXC1/TGFB1/WNT5A/POU6F1/SHH/MYOM1/HIVEP3/ETV1/CHKB/ITGB1/LARGE1/CTNNB1/EGR1/CDON/TGFBR1/EGR2/FOS/FHL1/EID2B/SVIL/MEF2A/SMAD3/SELENON/HLX/PLEC/UQCC2/S1PR1/FHL3/HBEGF/FOXK1/EGR3/EVC/NIBAN2/HOMER1
CC	GO:0005912	adherens junction	153	0.38108	1.45	0.00506576	0.0433259	0.0346278	1765	tags=24%, list=13%, signal=21%	CDH11/TMEM204/HMCN1/JCAD/EFNA5/PDLIM4/DLG4/FMN1/EPHA4/PKP1/NECTIN4/KIFC3/ESAM/RND1/CDH6/CDH3/PLPP3/FRMD4A/CTNNB1/CDH2/LLGL1/PPP1R9B/NPHP1/JAG1/WTIP/CYTH3/FERMT2/LAMA3/MSN/VCL/SHROOM2/TNK2/TMEM47/EFNB2/S100A11/PDLIM7
BP	GO:0030098	lymphocyte differentiation	266	0.355394	1.44977	0.00201875	0.0217756	0.017404	1736	tags=20%, list=13%, signal=18%	SOCS1/SOCS3/GLI3/IL1B/IL1A/PREX1/RUNX2/LAG3/ITPKB/ZEB1/IL7/BCL3/MMP14/CARD11/TGFB1/JUNB/KLHL25/USP44/PRDM1/SHH/AXL/TYRO3/IL2RG/ZC3H12A/NFKBIZ/GLI2/FOSL2/ITGB1/RUNX1/DOCK2/GAS6/IL11/LGALS1/IL4R/CTNNB1/CD74/VAV1/EGR1/IRF8/ADAM17/SMARCD3/IL15RA/IL18R1/JAK3/ZFP36L1/WNT4/SMARCE1/CLCF1/STAT3/SRF/MAFB/IRF1/FOXP1/HLX
MF	GO:0001216	DNA-binding transcription activator activity	289	0.350446	1.44824	0.00118684	0.0148175	0.0118427	2948	tags=34%, list=22%, signal=27%	IRX3/PRRX1/MEF2C/CREB3L1/RUNX2/FOXC2/MYCN/SALL2/GLI1/MECOM/HOXB2/POU4F1/FOXC1/NFATC1/HIF1A/JUNB/KLF7/MEIS3/ELK3/ZNF841/ETV1/FOSL2/CEBPB/TCF4/ETS1/RUNX1/ZNF208/TEF/ZNF212/CEBPD/TP63/ZNF836/PLAG1/FOXD2/ZNF227/EGR1/PLAGL1/ZNF225/EGR2/FOS/ZNF107/PAX6/ZNF585A/ZNF808/MAF/ZNF658/CREB3L3/ETV6/STAT3/SRF/ZNF319/FOSB/ZFAT/MEF2A/MAFB/IRF1/SMAD3/TBX19/NFAT5/PBX3/GLIS3/ZNF473/ZNF292/ELF4/ZNF615/PLSCR1/EGR3/GTF…
BP	GO:0043588	skin development	193	0.36767	1.4481	0.00507394	0.0433427	0.0346412	1662	tags=21%, list=13%, signal=18%	COL1A2/COL1A1/IL1A/KRT81/COL5A1/KRT6A/SNAI1/KRT17/COL5A2/ZBED2/IGFBP5/ADAMTS2/CNFN/FOXC1/KRT16/ABCA12/ITGB6/WNT5A/SHH/LRP4/NFKBIZ/GLI2/FOSL2/ITGA3/FOXE1/CD109/CDH3/PRKCH/AQP3/TP63/CTNNB1/HRNR/PAX6/ZFP36L1/JAG1/SRF/EXT1/SLC2A10/INTU/MAFB
BP	GO:0007596	blood coagulation	158	0.377444	1.44651	0.00563581	0.0464372	0.0371144	1955	tags=28%, list=15%, signal=25%	PDPN/PLAT/FAP/PRKG1/EMILIN1/PDGFRA/MYL9/ITGB3/ENTPD1/FERMT3/EPHB2/SERPING1/ST3GAL4/SHH/AXL/PLAU/TYRO3/FGG/TLR4/GAS6/SERPINE1/PDGFB/IL6ST/EMILIN2/FGA/VAV1/FGB/F3/FBLN1/APOE/HPS4/THBS1/SRF/SH2B3/TFPI2/VCL/BLOC1S3/SERPINE2/STXBP1/CD40/ADRA2C/RAB27A/FLNA/USF1/PLSCR1
BP	GO:0001816	cytokine production	479	0.333674	1.44314	0.000232809	0.00419838	0.00335551	2192	tags=24%, list=17%, signal=21%	POSTN/APOD/SRGN/CHI3L1/SOCS1/PAEP/IL1B/IL1A/IFI16/LUM/AFAP1L2/MC1R/LRRC32/LAG3/IGF2BP1/TWIST1/TLR5/PLA2R1/NOD1/IL7/LBP/BCL3/NFATC1/NAV3/HIF1A/CARD11/EPHB2/ADGRG1/TGFB1/LY96/TGFB3/IL1R1/SPHK1/ITGB6/WNT11/SSC5D/TRIB2/WNT5A/AXL/TICAM2/SULF1/ORM1/FN1/ZC3H12A/PDE4D/LTBP1/TLR4/CEBPB/TRAF2/SNAI2/HK1/TRIL/RUNX1/CRP/GAS6/SERPINE1/PTPRS/CDH3/SULF2/XAF1/IL4R/IL6ST/PELI1/ADCY7/AGPAT2/CD74/EGR1/IRF8/CD276/ADA…
BP	GO:0099536	synaptic signaling	391	0.339541	1.43885	0.000461086	0.00710357	0.00567746	2122	tags=23%, list=16%, signal=20%	SYT1/PLAT/LAMA2/SRGN/SYP/SV2A/KCNN1/IL1B/CDH11/CACNB1/MEF2C/GRM5/PDLIM4/KIF5A/SLC29A1/DLG4/SCTR/RASGRF1/HRH1/STAC3/RIMS3/STX1A/LRRTM2/RGS4/DRD1/EPHA4/EPHB2/DOC2A/SNAP25/CACNA1A/PRRT2/WNT5A/GPR176/NALCN/MAP1A/SLC1A7/SYT12/STX11/WNT7A/CCL2/SORCS3/ITGB1/ITPKA/NAPB/LARGE1/DNM1/CHRNE/PMP22/PTPRS/KCNMB4/LRRC4/LRP8/TSHZ3/GRIN2B/FCHSD1/GABRB3/CTNNB1/CDH2/EGR2/CLN3/NPR2/DMPK/GUCY1B1/APOE/RASGRF2/DVL1/ZMYN…
BP	GO:0043408	regulation of MAPK cascade	429	0.337559	1.43751	0.000491254	0.00745317	0.00595687	1458	tags=17%, list=11%, signal=15%	LPAR1/CHI3L1/PELI2/DACT1/BIRC7/PDGFRB/EMILIN1/IL1B/PDGFRA/IL1A/CCR1/MEF2C/GRM5/JCAD/ITGB3/ICAM1/IGF2/WNT7B/NOD1/MECOM/TIMP3/SPRED3/DUSP9/EPHA4/EPHB2/CSPG4/TGFB1/TGFB3/ADRA1B/SPHK1/ITGA1/WNT5A/DOK3/ALKAL1/FN1/ZC3H12A/NRP1/EFNA1/WNT7A/FGG/CCL2/TLR4/GADD45B/FGF1/TRAF2/MAP3K10/LBH/GAS6/MAP3K4/GSDME/IGFBP4/DNAJC27/IL11/PDGFB/IGF1R/FGA/CTNNB1/CDH2/CD74/CDON/DOK6/MAPK8IP3/TGFBR1/FGB/CDC42/FBLN1/APOE/SPR…
CC	GO:0030425	dendrite	368	0.342545	1.4373	0.000580046	0.00838125	0.00669863	2375	tags=25%, list=18%, signal=21%	LPAR1/PLXDC1/LAMA2/APOD/THY1/SV2A/GRM5/PREX1/KCNC2/NEGR1/PDLIM4/KIF5A/DLG4/IGF2BP1/HRH1/DNER/CNIH3/DRD1/TANC2/EPHA4/EPHB2/FAT3/KNDC1/PRRT2/MAGEE1/KCND3/ZNF385A/MAP1A/LRP4/KCNJ14/ITGB1/KIRREL1/ITPKA/LRRC4/LRP8/TP63/IL6ST/KCNC1/MAPK8IP3/ZFYVE27/PPP1R9B/HCN1/CDC42/LAMP5/APOE/RAP1GAP/SARM1/PTCH1/DVL1/LYNX1/TUBB3/ZMYND8/TRPC5/DNM3/NCDN/HOMER3/MARK4/ARHGAP33/DNAJB1/SLC38A2/AZIN2/CAMK2N1/PLEC/SORCS2/DYR…
CC	GO:0097447	dendritic tree	368	0.342545	1.4373	0.000580046	0.00838125	0.00669863	2375	tags=25%, list=18%, signal=21%	LPAR1/PLXDC1/LAMA2/APOD/THY1/SV2A/GRM5/PREX1/KCNC2/NEGR1/PDLIM4/KIF5A/DLG4/IGF2BP1/HRH1/DNER/CNIH3/DRD1/TANC2/EPHA4/EPHB2/FAT3/KNDC1/PRRT2/MAGEE1/KCND3/ZNF385A/MAP1A/LRP4/KCNJ14/ITGB1/KIRREL1/ITPKA/LRRC4/LRP8/TP63/IL6ST/KCNC1/MAPK8IP3/ZFYVE27/PPP1R9B/HCN1/CDC42/LAMP5/APOE/RAP1GAP/SARM1/PTCH1/DVL1/LYNX1/TUBB3/ZMYND8/TRPC5/DNM3/NCDN/HOMER3/MARK4/ARHGAP33/DNAJB1/SLC38A2/AZIN2/CAMK2N1/PLEC/SORCS2/DYR…
BP	GO:0050900	leukocyte migration	205	0.361251	1.4349	0.00539733	0.0450036	0.0359686	2021	tags=29%, list=15%, signal=25%	MMP2/APOD/THY1/EMILIN1/IL1B/IL1A/CCR1/ITGAL/PREX1/CXCL12/ITGB3/TNFSF14/ICAM1/LBP/MMP14/RAC2/CSF1/IL1R1/CXCL1/ST3GAL4/ITGA1/WNT5A/PECAM1/CXCL2/CCL2/ITGA3/ITGB1/VEGFB/PF4V1/CAMK1D/GAS6/SERPINE1/MSMP/PDGFB/CD74/VAV1/MTUS1/ADAM17/CKLF/GOLPH3/SLC8B1/CDC42/THBS1/CCL20/CXCL8/PPBP/CXCL6/EXT1/MSN/NBL1/IL12A/SCG2/PLEC/S1PR1/DOCK8/IL17RC/RABGEF1/PLCB1/RPS19/PIK3CD
BP	GO:0048589	developmental growth	455	0.332827	1.43433	0.000395786	0.00633529	0.00506342	2245	tags=24%, list=17%, signal=21%	POSTN/SYT1/APOD/PTK7/HOPX/PRKG1/GLI3/EDNRA/DDR2/SGCA/MEF2C/TBX2/BNC2/EFNA5/CXCL12/DRAXIN/FOXC2/BCL11A/GAS1/IGF2/CHST11/GLI1/DIO3/BASP1/FMN1/WNT7B/SEMA4B/IL7/FOXC1/RGS4/CSF1/DMBX1/BCL2L11/SOCS2/WNT11/WNT5A/SHH/LRP4/FN1/NRP1/FOXS1/GLI2/WNT7A/FOSL2/FGF1/ITGB1/RUNX1/LARGE1/HESX1/TNC/IGFBP1/PTPRS/SPP1/FKRP/CTNNB1/PLAG1/ULK2/NRP2/ZFYVE27/TGFBR1/NPR2/ZFP36L1/ULK1/APOE/MUL1/PTCH1/STAT5A/DVL1/SMURF1/ACVR2…
CC	GO:0031253	cell projection membrane	234	0.356007	1.43348	0.00434711	0.0387313	0.0309556	1858	tags=22%, list=14%, signal=19%	PDPN/THY1/ANTXR1/FAP/MXRA8/HHIP/JCAD/KCNC2/ITGB3/PLXND1/EVC2/SLC38A4/CA9/DRD1/SLC7A8/SLC34A2/ITGA5/TCTN2/CSPG4/CYBRD1/BBS1/ITGA3/ITGB1/PDE6B/SLC26A2/GUCY2D/GPR157/SCNN1A/MCHR1/CTNNB1/KCNC1/TMEM67/ADAM17/PPP1R9B/ITGAV/PLEKHO1/LAMP5/PTCH1/SPRY4/PDE4A/FERMT2/PTPRH/FSCN1/MSN/FERMT1/FGD5/PSD4/PKD2/MYO10/ANK1/BBS9/DOCK8
BP	GO:0007264	small GTPase mediated signal transduction	373	0.338215	1.42415	0.000739853	0.0102449	0.00818814	2614	tags=28%, list=20%, signal=23%	PDPN/LPAR1/COL1A2/PREX1/SYDE1/ARHGAP22/ITPKB/RASGRF1/PREX2/TGM2/PLEKHG5/ARHGAP31/EPHB2/ADGRG1/CELSR1/RAC2/RRAD/CSF1/KNDC1/DOK3/RASIP1/NRP1/ITGA3/ITGB1/RND1/DOCK2/ARHGEF17/RASGRP3/RHOV/CDC42SE1/VAV1/CDON/RIN2/DOK6/AGTR1/ARHGEF18/ARHGEF3/CDKN2A/DOCK9/PLEKHG3/ARHGAP40/ITGAV/CDC42/LAT/PLD2/ARHGEF40/APOE/RAP1GAP/RAB12/RASGRF2/RGL1/SPRY4/CBL/CYTH3/CDK2/SIPA1L2/RHOBTB2/DOCK4/RAB15/GARNL3/C15orf62/ARHGAP…
BP	GO:0001817	regulation of cytokine production	472	0.329194	1.42059	0.000236903	0.00424384	0.00339185	2192	tags=24%, list=17%, signal=20%	POSTN/APOD/SRGN/CHI3L1/SOCS1/PAEP/IL1B/IL1A/IFI16/LUM/AFAP1L2/MC1R/LRRC32/LAG3/IGF2BP1/TWIST1/TLR5/PLA2R1/NOD1/IL7/LBP/BCL3/NAV3/HIF1A/CARD11/EPHB2/TGFB1/LY96/TGFB3/IL1R1/SPHK1/ITGB6/WNT11/SSC5D/TRIB2/WNT5A/AXL/TICAM2/SULF1/ORM1/FN1/ZC3H12A/PDE4D/LTBP1/TLR4/CEBPB/TRAF2/SNAI2/HK1/TRIL/RUNX1/CRP/GAS6/SERPINE1/PTPRS/CDH3/SULF2/XAF1/IL4R/IL6ST/PELI1/ADCY7/AGPAT2/CD74/EGR1/IRF8/CD276/ADAM17/IL18R1/ITG…
BP	GO:0070371	ERK1 and ERK2 cascade	197	0.354483	1.40804	0.00594757	0.0479309	0.0383083	1458	tags=19%, list=11%, signal=17%	CHI3L1/PDGFRB/EMILIN1/IL1B/PDGFRA/IL1A/CCR1/ITGB3/ICAM1/WNK4/NOD1/TIMP3/SPRED3/DUSP9/EPHA4/EPHB2/TGFB1/ALKAL1/FN1/NRP1/FGG/CCL2/TLR4/FGF1/HESX1/GAS6/DNAJC27/PDGFB/FGA/CD74/FGB/ITGAV/ZFP36L1/FBLN1/APOE/SPRED1/FERMT2/CCL20
BP	GO:0050878	regulation of body fluid levels	243	0.344385	1.39526	0.00465117	0.0407713	0.032586	1955	tags=26%, list=15%, signal=23%	PDPN/PLAT/FAP/PRKG1/EMILIN1/PDGFRA/MYL9/ITGB3/SPINK1/SLC29A1/WNK4/ENTPD1/NPR3/HAS2/CORO2B/FERMT3/HIF1A/EPHB2/SERPING1/KCNN4/SOCS2/ST3GAL4/ZNF385A/SHH/AXL/PLAU/TYRO3/P2RY2/FGG/FOSL2/TLR4/GAS6/SERPINE1/AQP3/SCNN1A/PDGFB/IL6ST/EMILIN2/FGA/VAV1/FGB/F3/FBLN1/APOE/HPS4/CELSR2/STAT5A/THBS1/VIP/SRF/EXT1/SH2B3/TFPI2/VCL/BLOC1S3/SERPINE2/STXBP1/CD40/ADRA2C/RAB27A/FLNA/USF1/NCOR2/PLSCR1
CC	GO:0098552	side of membrane	363	0.330925	1.3919	0.00209075	0.0222769	0.0178046	1457	tags=21%, list=11%, signal=19%	THY1/ANTXR1/CD248/CRLF1/SOCS3/PDGFRA/CCR1/ACKR2/CTSK/ITGAL/EFNA5/CNTN3/CXCL12/NEGR1/ITGB3/LAG3/ICAM1/GAS1/DLG4/SLAMF7/TRAF5/COLEC11/STAC3/PLEKHA4/OSMR/ENG/GNG11/ITGA5/ART3/MMP17/IL1R1/ITGB6/RPS29/SLC4A3/ITGA1/GPC6/FRMD6/PLAU/ITGA10/IL2RG/LIFR/EFNA1/FGG/TLR4/ITGA3/TRAF2/GEM/ITGB1/RPS28/CLEC2B/CD109/EFNA3/RPS26/SLC22A11/SCNN1A/IL4R/PTP4A1/IL6ST/FGA/MCAM/LYPD3/CD74/RTN4RL1/CD276/ALPL/DIABLO/FGB/PPP1…
BP	GO:1901699	cellular response to nitrogen compound	461	0.320203	1.37792	0.00146371	0.0172847	0.0138146	1380	tags=15%, list=10%, signal=14%	MMP2/COL1A2/COL1A1/SOCS1/SOCS3/PDE3A/GJA1/EDNRA/IL1B/PDGFRA/DDR2/MMP3/CACNB1/MEF2C/GRM5/FBN1/COL5A2/KCNC2/RAB31/FOXC2/BCL11A/ITGB3/SPINK1/ICAM1/IGF2/HRH1/IGFBP5/ZEB1/TGM2/NOD1/COLEC12/RGS4/DRD1/PTPRE/EPHA4/COL4A1/EPHB2/COL16A1/CACNA1A/SOCS2/P2RY2/TLR4/CIB2/CEBPB/BMT2/TRAF2/COL6A1/LARGE1/IGFBP1/SCNN1A/IGF1R/GABRB3/CTNNB1/EGR1/AGTRAP/AGTR1/FOS/PAX6/PPP1R9B/NPR2/GLP2R/HCN1/GOLPH3/JAK3/ZFP36L1/GUCY1B…
BP	GO:0003013	circulatory system process	354	0.328576	1.37186	0.00484879	0.0420369	0.0335975	1658	tags=23%, list=13%, signal=21%	MMP2/POSTN/COL1A2/SCN4B/IRX3/HOPX/PRKG1/PDE3A/CORIN/GJA1/EDNRA/EMILIN1/SLC2A5/TBX2/CXCL12/FOXC2/SLC38A5/SLC29A1/HRH1/WNK4/C2CD4A/VSTM4/NPR3/CORO2B/ZEB2/FOXC1/RGS4/DRD1/SLC7A8/SERPING1/TGFB1/KCNE5/ADRA1B/RASL10B/TRPC1/ADAMTS16/C2CD4B/KCND3/SLC4A3/ITGA1/COL4A3/SOD2/ZC3H12A/PDE4D/P2RY2/FGG/ADRA1D/VEGFB/CRP/GAS6/KCNMB4/SPX/SCNN1A/PDGFB/EMILIN2/FGA/SLC2A1/SLC7A1/SLC13A3/AGTRAP/AGTR1/FGB/NPR2/CDC42/DMP…
BP	GO:0043009	chordate embryonic development	468	0.317801	1.37119	0.00122318	0.0151357	0.0120971	2361	tags=22%, list=18%, signal=19%	VANGL2/CTHRC1/PTK7/HOPX/DACT1/COL1A1/SOCS3/GLI3/EDNRA/PDGFRA/PRRX1/SNAI1/RUNX2/FOXC2/DZIP1L/MDFI/TWIST1/IGF2/CHST11/ZEB1/WNT7B/CMTM3/HOXB2/FKBP10/FOXC1/GDF7/SLC34A2/HIF1A/MMP14/CELSR1/TGFB1/JUNB/TGFB3/BCL2L11/PRDM1/WNT11/WNT5A/SHH/SULF1/GLI2/OSR1/CEBPB/ITGB1/PLPP4/SULF2/PDGFB/CTNNB1/ZBED6/SDC4/SLC39A1/TGFBR1/TBC1D32/PAX6/IFT140/FURIN/ZFP36L1/VASH2/PTCH1/NMT1/DVL1/HES1/CHRD/E2F7/CDK20/SRF/EXT1/ECE…
BP	GO:0006954	inflammatory response	478	0.315091	1.36351	0.00140442	0.0169283	0.0135297	2113	tags=26%, list=16%, signal=23%	DUOXA2/APOD/DUOXA1/CHI3L1/SOCS3/HP/IL1B/IL1A/NDP/IFI16/PTGES/MMP3/CCR1/AFAP1L2/ACKR2/ITGAL/SAA2/AKNA/SERPINA3/HRH1/WNK4/TLR5/PTGFR/C2CD4A/NOD1/TSPAN2/OSMR/ZEB2/KRT16/LBP/HIF1A/ALOX5AP/EPHB2/TGFB1/LY96/TPST1/CSF1/IL1R1/FBXL2/SPHK1/ITGB6/CXCL1/C2CD4B/WNT5A/AXL/TYRO3/TICAM2/CXCL2/ORM1/FN1/ZC3H12A/NFKBIZ/FOSL2/CCL2/TLR4/IL10RB/CEBPB/ITGB1/HK1/ETS1/TRIL/PF4V1/LARGE1/TRIM45/CAMK1D/TMEM258/CRP/TNC/IL1RN…
BP	GO:0007186	G protein-coupled receptor signaling pathway	346	0.324101	1.35329	0.00470946	0.0410841	0.0328361	1472	tags=19%, list=11%, signal=18%	LPAR1/KCTD12/SYP/PDGFRB/ADGRA2/PDE3A/EDNRA/KCTD16/CCR1/CGB7/ACKR2/MC1R/LHB/GRM5/PREX1/CXCL12/ITGB3/ADGRF4/SCTR/HRH1/PREX2/PTGFR/TGM2/NPR3/MRGPRF/RGS4/GNG11/DRD1/ADGRG1/CELSR1/RAC2/ADGRD1/ADRA1B/SPHK1/CXCL1/GPR176/TYRO3/PDE4D/CISH/P2RY2/GPR87/ADRA1D/CCL2/SORCS3/OR1F1/LPAR5/RGS17/GUCY2D/GPR157/GIPR/MCHR1/ADCY7/VAV1/AGTRAP/AGTR1/PPP1R9B/GPR39/GLP2R/CDC42/APOE/CELSR2/NMT1/PDE4A/NXPH4/CCL20/VIP/CXCL8
BP	GO:0050865	regulation of cell activation	375	0.321441	1.35269	0.00187171	0.0209338	0.0167311	2359	tags=27%, list=18%, signal=23%	PDPN/THY1/SOCS1/PRKG1/GLI3/EMILIN1/IL1B/PDGFRA/DDR2/IL1A/MEF2C/LRRC32/LAG3/TNFSF14/ITPKB/IGF2/ZEB1/IL7/LBP/MMP14/CARD11/EPHB2/RAC2/TGFB1/JUNB/KLHL25/SPHK1/PRDM1/WNT5A/SHH/AXL/TYRO3/IL2RG/TICAM2/FN1/ZC3H12A/NFKBIZ/GLI2/CCL2/TLR4/CEBPB/RUNX1/GAS6/MAP3K8/LGALS1/IL4R/PDGFB/IL6ST/EMILIN2/PELI1/CTNNB1/HAVCR1/CD74/SLC7A1/VAV1/SDC4/CD276/SMARCD3/SLC39A10/IL15RA/JAK3/ZFP36L1/LAT/APOE/THBS1/TWSG1/SMARCE1/H…
BP	GO:0071417	cellular response to organonitrogen compound	433	0.31482	1.34411	0.00293257	0.0289073	0.0231039	1303	tags=14%, list=10%, signal=13%	MMP2/COL1A2/COL1A1/SOCS1/SOCS3/PDE3A/GJA1/EDNRA/IL1B/PDGFRA/DDR2/CACNB1/MEF2C/GRM5/FBN1/COL5A2/RAB31/FOXC2/BCL11A/ITGB3/SPINK1/ICAM1/IGF2/HRH1/IGFBP5/ZEB1/TGM2/NOD1/RGS4/DRD1/PTPRE/EPHA4/COL4A1/EPHB2/COL16A1/CACNA1A/SOCS2/P2RY2/TLR4/CIB2/CEBPB/BMT2/COL6A1/LARGE1/IGFBP1/SCNN1A/IGF1R/GABRB3/CTNNB1/EGR1/AGTRAP/AGTR1/FOS/PAX6/PPP1R9B/NPR2/GLP2R/HCN1/GOLPH3/JAK3/ZFP36L1
BP	GO:0016050	vesicle organization	298	0.324769	1.34376	0.00584533	0.0473804	0.0378683	2546	tags=20%, list=19%, signal=16%	SYT1/TYRP1/SRGN/SYP/DLG4/PHETA2/SNX10/RNASEK/STX1A/ZEB2/DOC2A/SNAP25/ATP6V0C/SPHK1/PRRT2/ZNF385A/RAB34/STX11/MFSD14A/DNM1/VPS37D/SDC4/CLN3/PLEKHF2/VPS37B/GOLPH3/BACE2/APOE/HPS4/RAB12/PLEKHF1/VPS39/IST1/SHROOM2/BLOC1S3/SERPINE2/ZFYVE16/SAMD9/TRAPPC10/STXBP1/RAB27A/TGFBRAP1/SNX33/BAIAP3/SRPX/ABCA1/TBC1D20/SYT11/HPS3/BLOC1S1/STX2/STXBP6/CHMP6/CSNK1D/ASIP/ATP6V0A1/TSNARE1/LAPTM4B/ARL8B
BP	GO:0009792	embryo development ending in birth or egg hatching	485	0.309605	1.33985	0.00403081	0.0367246	0.0293518	2374	tags=22%, list=18%, signal=19%	VANGL2/CTHRC1/PTK7/HOPX/DACT1/COL1A1/SOCS3/GLI3/EDNRA/PDGFRA/PRRX1/SNAI1/RUNX2/FOXC2/DZIP1L/MDFI/TWIST1/IGF2/CHST11/ZEB1/WNT7B/CMTM3/HOXB2/FKBP10/FOXC1/GDF7/SLC34A2/HIF1A/MMP14/CELSR1/TGFB1/JUNB/TGFB3/BCL2L11/PRDM1/WNT11/WNT5A/SHH/SULF1/GLI2/OSR1/STOX2/ACSL4/CEBPB/ITGB1/PLPP4/SULF2/PDGFB/CTNNB1/ZBED6/SDC4/SLC39A1/TGFBR1/TBC1D32/PAX6/IFT140/FURIN/ZFP36L1/VASH2/PTCH1/NMT1/DVL1/HES1/CHRD/E2F7/CDK20/…
BP	GO:0046649	lymphocyte activation	479	0.306654	1.32628	0.00284362	0.0283509	0.0226592	1751	tags=18%, list=13%, signal=16%	THY1/SOCS1/SOCS3/GLI3/IL1B/IL1A/ITGAL/MEF2C/PREX1/RUNX2/LRRC32/LAG3/TNFSF14/ICAM1/ITPKB/SLAMF7/IGF2/ZEB1/IL7/BCL3/MMP14/CARD11/EPHB2/RAC2/TGFB1/JUNB/KLHL25/USP44/PRDM1/SHH/AXL/TYRO3/IL2RG/TICAM2/ZC3H12A/NFKBIZ/GLI2/FOSL2/CCL2/TLR4/CEBPB/ITGB1/SH2D2A/RUNX1/DOCK2/GAS6/MAP3K8/IL11/LGALS1/IL4R/IL6ST/PELI1/CTNNB1/CD74/SLC7A1/VAV1/EGR1/SDC4/IRF8/CD276/ADAM17/SMARCD3/SLC39A10/IL15RA/IL18R1/JAK3/ZFP36L1/…
BP	GO:0016049	cell growth	363	0.315258	1.32601	0.00600694	0.0481591	0.0384906	2242	tags=24%, list=17%, signal=20%	POSTN/SYT1/PRKG1/GJA1/EDNRA/IGFBP7/MEG3/KRT17/EFNA5/CXCL12/DRAXIN/BCL11A/IGFBP5/SEMA4B/RGS4/EGLN2/MMP14/TGFB1/SPHK1/SOCS2/WNT11/WNT5A/MUC12/FN1/CISH/NRP1/ITGB1/TNC/IGFBP1/PTPRS/IGFBP4/SPP1/LTBP4/CTNNB1/ULK2/AGTR1/NRP2/ZFYVE27/SPOCK1/TGFBR1/ADAM17/CDKN2A/PPP1R9B/NPR2/SERTAD3/CDC42/ULK1/FHL1/APOE/MUL1/DVL1/SMURF1/CDK11A/TRPC5/JADE2/SRF/EXT1/IST1/VCL/SERPINE2/MEX3C/RARG/SEMA4C/CCAR2/SMAD3/FOXP1/SLC9…
MF	GO:0140657	ATP-dependent activity	432	-0.328502	-1.37767	0.00361698	0.0336124	0.0268644	3529	tags=34%, list=27%, signal=26%	IGHMBP2/UBA5/HELLS/MYO1C/ACSF3/ATP6V1C1/EIF4A2/CLPB/KIF5B/ATAD5/MCM8/YTHDC2/CHTF18/DHX33/PEX6/MSH3/CHD1L/LONP1/PEX1/DNAH5/LONP2/BCS1L/HELQ/DDX20/SUPV3L1/RFC5/CCT7/ACSL1/ATP9A/XRCC6/PFN2/ATP7B/ABCB10/ACSL3/ABCB7/TCP1/ATP6V0B/SMC2/RFC3/ERCC2/NTPCR/ORC4/RFC4/MRE11/HSPH1/KIF27/DYNLRB2/ZRANB3/RUVBL2/HSP90AB1/MSH2/DHX29/CCT3/TP53/OLA1/HSPA4L/CCT4/ATAD3B/ATP11C/ATP6V0E1/ABCC11/ATP5F1A/DDX56/MYO5C/SWSAP1…
CC	GO:0016324	apical plasma membrane	260	-0.356924	-1.42892	0.00483209	0.0419442	0.0335235	1447	tags=22%, list=11%, signal=20%	MAL2/P2RY1/MUC13/EPCAM/ATP8B1/ENPEP/ADGRG2/HSP90AA1/SLC17A1/CRB3/ATP1B1/SLC6A20/DPP4/SLC17A4/ABCC2/SLCO2B1/SLC15A1/SLC23A1/ABCG8/PARD6G/DSG1/SLC7A9/ABCC4/MTCL1/SLC12A2/PARD3B/CD36/IL6R/ABCB1/ANXA13/PARD6A/SAPCD2/OXTR/SLC17A2/CLIC5/CYP4A11/SLC28A1/CFTR/NHERF4/SLC17A3/SLC3A1/ENPP3/ANO1/PTH1R/ASPM/MYO1A/CEACAM6/SLC22A7/CEACAM5/ACE2/SLC22A1/SLC38A3/SLC26A3/SLC5A1/UPK3A/GP2
BP	GO:0006302	double-strand break repair	269	-0.357225	-1.44135	0.00438821	0.038914	0.0311016	1324	tags=14%, list=10%, signal=13%	NSMCE4A/RMI1/WRAP53/NSMCE1/MCMDC2/FANCD2/KDM4D/MGMT/SLF1/DNA2/GINS4/RECQL4/UHRF1/CHEK1/MCM5/BRCA2/XRCC3/MCM2/BRCA1/XRCC2/PARPBP/MCM6/DCLRE1A/BRIP1/HMGB2/POLQ/BLM/RAD51/RAD54B/GINS2/TRIP13/FOXM1/CDCA5/RMI2/RAD51AP1/ESCO2/CDC45
BP	GO:0000226	microtubule cytoskeleton organization	498	-0.341694	-1.44913	0.000264653	0.00459456	0.00367215	912	tags=16%, list=7%, signal=15%	AURKC/HOOK1/HAUS5/DCTN6/NPM1/STMN1/CHP1/KNSTRN/KIFBP/PIERCE2/NEFH/SPATA7/TUBB4B/TUBA1A/ZBED3/AURKA/RANBP1/INTS13/KIF18A/SNCA/TUBA1B/FKBP4/RSPH1/TUBB2A/CFAP91/CENPH/MNS1/KIF11/TUBB2B/PRICKLE1/PARD6G/CCNF/CHEK1/ESPL1/MTCL1/PARD3B/CCDC88C/KATNAL2/CENPE/BRCA2/XRCC3/BRCA1/PARD6A/PLK1/SAPCD2/CCNB1/AURKB/XRCC2/TACC3/GAS2L3/SLAIN1/PLK4/CCDC170/NEFL/MAD2L1/NEK2/PRC1/MAP2/TTK/TPX2/ASPM/CRYAB/TUBB4A/BIRC5/C…
CC	GO:0098798	mitochondrial protein-containing complex	255	-0.363416	-1.45068	0.00357245	0.0332872	0.0266045	3575	tags=53%, list=27%, signal=39%	TIMM50/MICU2/ATP5MC2/PDHB/SDHC/APOO/MRPS10/MRPL55/MRPL19/SAMM50/NDUFA10/NDUFB8/PMPCA/BCS1L/PDK1/MRPL48/NDUFS4/GRPEL1/NFS1/PDHX/SUPV3L1/NDUFC2/PMPCB/LYRM4/MRPS14/IMMT/MRPL3/TOMM70/TOMM40/UQCRC1/IDH3A/MRPS28/MPC1/MRPL35/MRPL21/PDHA1/GADD45GIP1/MRPS6/HADHB/ISCU/SDHD/NDUFV2/MRPL10/IDH3G/SLC25A5/PDK2/MRPS16/PTCD3/NDUFS2/MRPL42/COX7A2L/PPIF/MTX2/TIMM13/APOOL/PHB2/ATP5F1A/MRPL47/COX4I1/C15orf48/AURKAIP1…
BP	GO:0007346	regulation of mitotic cell cycle	404	-0.350294	-1.45571	0.00158096	0.0184411	0.0147389	872	tags=12%, list=7%, signal=11%	STOX1/CKS2/NPM2/HYAL1/EDN1/BUB1B/CHEK1/ESPL1/ZWINT/TM4SF5/CENPE/BRCA2/XRCC3/ASAH2/BRCA1/PLK1/KIF14/CCNB1/AURKB/CENPF/CDC6/MAD2L1/ANLN/NEK2/SMPD3/BLM/CDC25A/TTK/CDCA2/TRIP13/CLSPN/CDCA5/BIRC5/CDCA8/E2F1/SPC24/DTL/BUB1/PKMYT1/DLGAP5/NDC80/NUF2/MKI67/RRM2/CDK1/GTSE1/CDC20/UBE2C
BP	GO:1901361	organic cyclic compound catabolic process	421	-0.35382	-1.47787	0.000479957	0.00731357	0.0058453	3208	tags=30%, list=24%, signal=23%	SND1/A1CF/ELAC2/SNX17/FASTKD2/LSM1/SMPDL3A/SUPV3L1/GAS5/ZFP36L2/EIF3E/SUCLA2/LRPPRC/SETMAR/RNASEH2B/YBX1/SAMHD1/QDPR/ACMSD/CDADC1/NT5E/DKC1/LSM4/OIP5-AS1/DUT/LARP1B/EPHX2/EXOSC3/NUDT5/PPP1R8/ACAA1/MRTO4/MTPAP/DNPH1/SLCO1B3/METTL3/EXOSC7/DIS3L/EXOSC9/POLR2G/DCTPP1/ENTPD6/HPRT1/NFE2L2/EXOSC4/BLVRA/EXOSC1/EXOSC8/NUDT9/SULT1E1/ZCCHC7/HSD17B11/MAGOHB/SAMD4A/FEN1/PDE12/SSB/NUDT12/TNFRSF1B/NUDT16/NTHL1/…
BP	GO:1901617	organic hydroxy compound biosynthetic process	178	-0.386331	-1.48015	0.00532381	0.0446037	0.035649	1547	tags=22%, list=12%, signal=20%	ABCA2/HSD17B10/TM7SF2/GPER1/P2RY1/OSBPL6/ACAA2/PTS/ACOX2/SNCA/ACOT8/CYP27A1/GOT1/ARV1/AKR1C3/PSAT1/LDHC/DHFR/HMGCS1/CLCN2/ABCG1/ALDH2/ASAH2/PCBD1/OSBPL7/AKR1D1/CFTR/PAH/SLC27A2/PTH1R/DAO/DDC/HMGCS2/SPTSSB/AKR1C4/PCK1/SRD5A2/FGF19/APOA1/CYP3A4
CC	GO:0030496	midbody	179	-0.394151	-1.51055	0.00289466	0.0286145	0.0228698	2665	tags=25%, list=20%, signal=20%	RACGAP1/TTLL12/DCTN3/ARL2BP/C9orf72/JTB/ANKRD54/FAM50B/ABRAXAS2/MICAL3/UVRAG/CHMP2A/EXOC6/TSG101/CIAO2B/RACK1/RAN/ERH/KIF20B/SCCPDH/AURKC/MPLKIP/RASGEF1B/AGBL5/CPEB3/AURKA/DCDC1/MTCL1/FIRRM/CELF2/CENPE/PLK1/KIF14/AURKB/CENPF/ANLN/NEK2/PRC1/ASPM/BIRC5/CDCA8/SPAG5/KIF4A/CDK1/SHCBP1
BP	GO:0010876	lipid localization	349	-0.368687	-1.52033	0.000481155	0.00731587	0.00584713	1586	tags=20%, list=12%, signal=18%	ATP10B/MTTP/ABCA2/CPT2/PRELID1/EPRS1/OSBPL6/BDKRB2/VPS13A/ATP8B1/CAV1/ARV1/CLU/UGCG/BLTP3B/SLCO4A1/LRAT/PRAP1/PON1/PLA2G4C/TTPA/GULP1/CIDEC/GRAMD1B/AKR1C1/ENPP7/ABCC2/SLCO2B1/AGT/ABCG8/EDN1/FABP1/TSKU/ABCC4/ABCA3/ABCG1/CD36/PLA2G12B/ABCB1/PROCA1/SLCO1B1/SLC25A10/AQP9/DGAT2/XKR9/PLA2G1B/OSBPL7/MFSD2A/CYP4A11/CFTR/SLC27A2/APOH/SLC51A/SPNS2/RBP4/KCNJ8/NR0B2/SLC25A21/SOAT2/SLC22A7/ANGPTL3/AKR1C4/GAL/…
BP	GO:0009150	purine ribonucleotide metabolic process	283	-0.379329	-1.52777	0.000896188	0.0119092	0.00951828	2354	tags=31%, list=18%, signal=26%	STOML2/DNAJC30/HPRT1/ATP5F1A/NADK/PAPSS2/DLD/MMUT/NUDT9/EFL1/ACSM5/SULT1E1/ACSF2/PAPSS1/FIS1/RAN/ACACB/ATP5MC1/PAICS/PPCDC/ATP5PB/AMPD3/TSPO/HSPA8/XDH/BPNT1/BEND3/SDHA/NME3/PPAT/PRKAG2/NDUFS7/MPC2/SUCLG2/NDUFB5/ATP5F1D/ATP5F1C/NDUFA9/AADAT/ABHD14B/ELOVL7/PDK4/ATIC/PDE5A/GDA/SNCA/NDUFS3/ACOT8/NDUFAB1/GCDH/MTHFD1/AK2/AK4/ATP5F1B/APRT/SDHB/OXSM/NDUFV1/NME1/NDUFA8/ATP5PO/ATP1B1/SUCLG1/ATP5MC3/LDHC/AC…
CC	GO:0000228	nuclear chromosome	187	-0.396096	-1.53314	0.00370354	0.0342345	0.0273615	2645	tags=24%, list=20%, signal=20%	POLD1/ZRANB3/NCAPG2/RUVBL2/NIFK/TUBG1/RCC1/TIMELESS/EXOSC9/INO80C/ORC5/SWI5/HUS1/TRIM24/GINS3/POLA2/RUVBL1/TIPIN/NCAPD3/POLE2/WDHD1/RRS1/UCHL5/EME2/RSPH1/GINS4/CHEK1/PRIM1/MCM5/BRCA2/MCM2/BRCA1/PLK1/ORC6/MCM6/TOP2A/NEK2/BLM/RAD51/GINS2/BIRC5/NCAPG/MCM10/NCAPH/CDC45
MF	GO:0015291	secondary active transmembrane transporter activity	178	-0.400261	-1.53351	0.00274754	0.0277096	0.0221466	1174	tags=19%, list=9%, signal=18%	SLCO4A1/SLCO4C1/SLC17A1/SLC6A20/SLC17A4/SLC25A19/SLCO2B1/SLC15A1/SLC23A1/SLC25A15/SLC7A9/SLC12A2/SLC30A4/SLC5A9/SLC39A5/SLCO1B1/SLC25A10/SLC17A2/SLC25A18/MFSD2A/SLC28A1/UCP2/SLC17A3/SLC16A10/SLC16A12/SLC25A21/SLC16A9/CDH17/SLC22A7/SLC22A1/SLC38A3/SLC10A1/SLC26A3/SLC5A1
BP	GO:0015850	organic hydroxy compound transport	191	-0.39566	-1.53413	0.00351643	0.032897	0.0262926	1291	tags=20%, list=10%, signal=19%	ATP8B1/SNCA/CAV1/ARV1/CLU/PON1/AQP11/GRAMD1B/AKR1C1/ENPP7/AQP7/ABCC2/AGT/ABCG8/TSKU/ABCC4/ABCA3/ABCG1/CD36/SNCG/SLCO1B1/OXTR/AQP9/AQP7B/OSBPL7/CFTR/SLC51A/RBP4/NR0B2/SOAT2/AKR1C4/GAL/SLC22A1/FGF19/APOC3/APOA1/SLC10A1/SLC5A1/APOA5
BP	GO:0000910	cytokinesis	154	-0.407199	-1.53951	0.0042708	0.0382842	0.0305983	711	tags=12%, list=5%, signal=11%	ESPL1/DCDC1/KLHL13/BRCA2/PLK1/KIF14/AURKB/SEPTIN4/CDC6/ANK3/ANLN/PRC1/BIRC5/CIT/CDCA8/CENPA/KIF4A/E2F8
BP	GO:0007098	centrosome cycle	119	-0.424156	-1.54242	0.00543311	0.0451939	0.0361208	904	tags=13%, list=7%, signal=13%	KIF11/PARD6G/CCNF/CHEK1/BRCA2/XRCC3/BRCA1/PARD6A/PLK1/XRCC2/PLK4/NEK2/SGO1/NDC80/CDK1/PCLAF
BP	GO:0006163	purine nucleotide metabolic process	360	-0.373419	-1.54378	0.000229267	0.0041668	0.00333028	3569	tags=42%, list=27%, signal=32%	GUK1/FHIT/HAAO/ATP5MC2/PMVK/PDHB/MPP1/SDHC/PPARGC1A/PGLS/ACSF3/NME5/MTOR/MVD/SLC25A16/ITPA/MCEE/NDUFA10/NDUFB8/MACROH2A1/HACD1/PDK1/NDUFS4/PDHX/ACSL1/RPE/NME4/NDUFC2/SUCLA2/ACSL3/SAMHD1/PDHA1/ACMSD/SDHD/NDUFV2/NADK2/NT5E/HSD17B4/GMPR/PDK2/NUDT5/NDUFS2/PPARA/DNPH1/FMO5/TP53/OLA1/PRPSAP2/STOML2/DNAJC30/HPRT1/ATP5F1A/NADK/PAPSS2/DLD/MMUT/NUDT9/EFL1/ACSM5/SULT1E1/ACSF2/PAPSS1/NUDT12/FIS1/TKT/NUDT16/G…
BP	GO:1902749	regulation of cell cycle G2/M phase transition	96	-0.44628	-1.55815	0.0058315	0.0473374	0.037834	725	tags=31%, list=5%, signal=30%	MBTPS2/RNASEH2B/RAB11A/MRE11/TAOK3/BRSK1/TP53/RINT1/CCNQ/NAE1/CCND1/HUS1/RAD51C/NPM1/AURKA/STOX1/CHEK1/BRCA1/PLK1/KIF14/CCNB1/AURKB/CENPF/CDC6/BLM/CDC25A/CLSPN/DTL/PKMYT1/CDK1
BP	GO:0015849	organic acid transport	226	-0.394582	-1.55887	0.000773468	0.0106052	0.00847608	1549	tags=25%, list=12%, signal=22%	MPC2/SFXN2/CPT2/EPRS1/BDKRB2/SLC23A3/SLC1A4/SLC7A7/ATP8B1/SNCA/SLC7A10/SLCO4A1/SLC6A20/AKR1C1/ABCC2/SLCO2B1/SLC23A1/EDN1/FABP1/SLC25A15/SLC7A9/ABCC4/SLC12A2/CD36/PLA2G12B/ABCB1/PROCA1/SLCO1B1/CLTRN/SLC25A10/AQP9/PLA2G1B/SLC25A18/MFSD2A/CYP4A11/UCP2/SLC38A11/SLC27A2/SLC3A1/SLC51A/SLC16A10/KCNJ8/SLC16A12/NR0B2/AGXT/SLC25A21/SLC16A9/SLC22A7/AKR1C4/ACE2/SLC22A1/FGF19/SLC38A3/RBP2/SLC10A1/SLC26A3
BP	GO:0006869	lipid transport	310	-0.382933	-1.55944	0.000448485	0.00694008	0.00554679	1586	tags=22%, list=12%, signal=20%	ATP10B/MTTP/ABCA2/CPT2/PRELID1/EPRS1/OSBPL6/BDKRB2/VPS13A/ATP8B1/CAV1/ARV1/CLU/UGCG/BLTP3B/SLCO4A1/LRAT/PRAP1/PON1/TTPA/GULP1/CIDEC/GRAMD1B/AKR1C1/ENPP7/ABCC2/SLCO2B1/AGT/ABCG8/EDN1/FABP1/TSKU/ABCC4/ABCA3/ABCG1/CD36/PLA2G12B/ABCB1/PROCA1/SLCO1B1/SLC25A10/AQP9/XKR9/PLA2G1B/OSBPL7/MFSD2A/CYP4A11/CFTR/SLC27A2/APOH/SLC51A/SPNS2/RBP4/KCNJ8/NR0B2/SLC25A21/SOAT2/SLC22A7/AKR1C4/GAL/APOF/SLC22A1/FGF19/APO…
BP	GO:1901136	carbohydrate derivative catabolic process	131	-0.423962	-1.56251	0.00503231	0.0430927	0.0344414	1954	tags=24%, list=15%, signal=21%	NUDT16/GPD1/NTHL1/AMPD3/XDH/GLA/SUCLG2/HPSE/PDE5A/GDA/ENPP4/OVGP1/HYAL3/ENTPD5/SUCLG1/ACAT1/HOGA1/HYAL1/NEU3/DPYS/NUDT7/ACOT7/NUDT8/CEMIP/ALDH1A1/APOBEC3H/APOBEC1/UPP2/UPB1/HMMR/PGLYRP2/MMP12
BP	GO:0000725	recombinational repair	161	-0.413563	-1.56351	0.00314801	0.0304293	0.0243203	1324	tags=17%, list=10%, signal=15%	NSMCE4A/RMI1/WRAP53/NSMCE1/MCMDC2/KDM4D/SLF1/GINS4/RECQL4/UHRF1/CHEK1/MCM5/BRCA2/XRCC3/MCM2/BRCA1/XRCC2/PARPBP/MCM6/POLQ/BLM/RAD51/RAD54B/GINS2/RMI2/RAD51AP1/CDC45
BP	GO:0046942	carboxylic acid transport	225	-0.396406	-1.56413	0.00108001	0.0137795	0.0110131	1549	tags=25%, list=12%, signal=22%	MPC2/SFXN2/CPT2/EPRS1/BDKRB2/SLC23A3/SLC1A4/SLC7A7/ATP8B1/SNCA/SLC7A10/SLCO4A1/SLC6A20/AKR1C1/ABCC2/SLCO2B1/SLC23A1/EDN1/FABP1/SLC25A15/SLC7A9/ABCC4/SLC12A2/CD36/PLA2G12B/ABCB1/PROCA1/SLCO1B1/CLTRN/SLC25A10/AQP9/PLA2G1B/SLC25A18/MFSD2A/CYP4A11/UCP2/SLC38A11/SLC27A2/SLC3A1/SLC51A/SLC16A10/KCNJ8/SLC16A12/NR0B2/AGXT/SLC25A21/SLC16A9/SLC22A7/AKR1C4/ACE2/SLC22A1/FGF19/SLC38A3/RBP2/SLC10A1/SLC26A3
BP	GO:0009117	nucleotide metabolic process	413	-0.376806	-1.57189	3.91624e-05	0.00100115	0.00080016	3569	tags=42%, list=27%, signal=32%	GUK1/FHIT/HAAO/ATP5MC2/PMVK/PDHB/MPP1/SDHC/ADAL/PPARGC1A/PGLS/ACSF3/NME5/MTOR/KARS1/MVD/SLC25A16/ITPA/MCEE/NDUFA10/NDUFB8/MACROH2A1/HACD1/PDK1/UMPS/NDUFS4/PDHX/ACSL1/RPE/NME4/NDUFC2/SUCLA2/ACSL3/RNASEH2B/SAMHD1/PDHA1/ACMSD/SDHD/NDUFV2/NADK2/NT5E/NT5C3A/HSD17B4/DUT/DTYMK/GMPR/PDK2/NUDT5/NDUFS2/PPARA/DNPH1/FMO5/TP53/OLA1/PRPSAP2/STOML2/DCTPP1/DNAJC30/HPRT1/UPRT/ATP5F1A/NADK/PAPSS2/DLD/MMUT/NUDT9/EF…
BP	GO:0000077	DNA damage checkpoint signaling	113	-0.437362	-1.57577	0.0045396	0.0400023	0.0319714	3166	tags=32%, list=24%, signal=24%	CHEK2/BRCC3/PIDD1/STK33/H2AX/MBTPS2/RNASEH2B/UFL1/MRE11/TAOK3/ATRIP/TIPRL/MAP3K20/MSH2/BRSK1/TP53/RINT1/CCND1/HUS1/TIPIN/EME2/PRAP1/WDR76/FANCD2/CHEK1/BRCA2/BRCA1/PLK1/BRIP1/BLM/RAD51/CLSPN/E2F1/DTL/CDK1/GTSE1
BP	GO:0006753	nucleoside phosphate metabolic process	422	-0.377256	-1.57681	5.45692e-05	0.00131778	0.00105322	3550	tags=42%, list=27%, signal=32%	GUK1/FHIT/HAAO/ATP5MC2/PMVK/PDHB/MPP1/SDHC/ADAL/PPARGC1A/PGLS/ACSF3/NME5/MTOR/KARS1/MVD/SLC25A16/ITPA/MCEE/NDUFA10/NDUFB8/MACROH2A1/HACD1/PDK1/UMPS/NDUFS4/SMPDL3A/PDHX/ACSL1/RPE/NME4/NDUFC2/SUCLA2/ACSL3/RNASEH2B/SAMHD1/PDHA1/ACMSD/SDHD/NDUFV2/NADK2/NT5E/NT5C3A/HSD17B4/DUT/DTYMK/GMPR/PDK2/NUDT5/NDUFS2/PPARA/DNPH1/FMO5/TP53/OLA1/PRPSAP2/STOML2/DCTPP1/DNAJC30/ENTPD6/HPRT1/UPRT/ATP5F1A/NADK/PAPSS2/DL…
BP	GO:0000724	double-strand break repair via homologous recombination	158	-0.41764	-1.58096	0.00163077	0.018719	0.0149609	1324	tags=17%, list=10%, signal=16%	NSMCE4A/RMI1/WRAP53/NSMCE1/MCMDC2/KDM4D/SLF1/GINS4/RECQL4/UHRF1/CHEK1/MCM5/BRCA2/XRCC3/MCM2/BRCA1/XRCC2/PARPBP/MCM6/POLQ/BLM/RAD51/RAD54B/GINS2/RMI2/RAD51AP1/CDC45
BP	GO:0015718	monocarboxylic acid transport	114	-0.439051	-1.58387	0.00521115	0.0440831	0.035233	954	tags=29%, list=7%, signal=27%	MPC2/CPT2/EPRS1/BDKRB2/ATP8B1/SLCO4A1/AKR1C1/ABCC2/SLCO2B1/EDN1/FABP1/ABCC4/CD36/PLA2G12B/PROCA1/SLCO1B1/AQP9/PLA2G1B/MFSD2A/CYP4A11/SLC27A2/SLC51A/SLC16A10/KCNJ8/SLC16A12/NR0B2/SLC16A9/SLC22A7/AKR1C4/SLC22A1/FGF19/RBP2/SLC10A1
BP	GO:0009259	ribonucleotide metabolic process	303	-0.395377	-1.60634	0.000138249	0.00279453	0.0022335	2354	tags=31%, list=18%, signal=26%	STOML2/DNAJC30/HPRT1/UPRT/ATP5F1A/NADK/PAPSS2/DLD/MMUT/NUDT9/EFL1/ACSM5/SULT1E1/UCKL1/ACSF2/PAPSS1/FIS1/UCK2/RAN/ACACB/ATP5MC1/PAICS/PPCDC/ATP5PB/AMPD3/TSPO/HSPA8/XDH/BPNT1/BEND3/SDHA/NME3/PPAT/PRKAG2/NDUFS7/CTPS1/MPC2/SUCLG2/NDUFB5/ATP5F1D/ATP5F1C/NDUFA9/AADAT/ABHD14B/ELOVL7/PDK4/ATIC/PDE5A/GDA/SNCA/NDUFS3/ACOT8/NDUFAB1/GCDH/MTHFD1/AK2/AK4/ATP5F1B/APRT/SDHB/OXSM/NDUFV1/NME1/NDUFA8/ATP5PO/ATP1B1/…
BP	GO:0019693	ribose phosphate metabolic process	310	-0.395841	-1.612	0.000148977	0.00294456	0.00235341	2360	tags=31%, list=18%, signal=26%	PRPSAP2/STOML2/DNAJC30/HPRT1/UPRT/ATP5F1A/NADK/PAPSS2/DLD/MMUT/NUDT9/EFL1/ACSM5/SULT1E1/UCKL1/ACSF2/PAPSS1/FIS1/UCK2/NUDT14/RAN/ACACB/ATP5MC1/PAICS/PPCDC/ATP5PB/AMPD3/TSPO/HSPA8/XDH/BPNT1/BEND3/SDHA/NME3/PPAT/PRKAG2/NDUFS7/CTPS1/MPC2/SUCLG2/NDUFB5/ATP5F1D/ATP5F1C/NDUFA9/AADAT/ABHD14B/ELOVL7/PDK4/ATIC/PDE5A/GDA/SNCA/NDUFS3/ACOT8/NDUFAB1/GCDH/MTHFD1/AK2/AK4/ATP5F1B/APRT/SDHB/OXSM/NDUFV1/NME1/NDUFA8…
MF	GO:0016747	acyltransferase activity, transferring groups other than amino-acyl groups	170	-0.424456	-1.61479	0.000880598	0.0117663	0.00940409	1488	tags=22%, list=11%, signal=20%	NAGS/ALAS1/CPT2/MOGAT3/ABHD14B/ACAA2/ELOVL7/ASPG/PRDX6/GNPNAT1/LRAT/NAA10/OXSM/OSGEPL1/NAA20/PLAAT3/PLA2G4C/MOGAT1/ACAT1/GPAT3/ELOVL6/FASN/NAT2/PNPLA4/BRCA2/PLAAT2/DGAT2/ACSM2B/GCAT/MOGAT2/ACSM3/ACSM2A/SPTSSB/SOAT2/GLYATL1/ESCO2/GLYAT
MF	GO:0008514	organic anion transmembrane transporter activity	167	-0.426839	-1.62195	0.00160115	0.0185622	0.0148356	1549	tags=24%, list=12%, signal=21%	MPC2/SFXN2/SLC23A3/SLC1A4/SLC7A7/SLC7A10/SLCO4A1/SLCO4C1/SLC6A20/SLC25A19/ABCC2/SLCO2B1/SLC23A1/SLC25A15/SLC7A9/ABCC4/CD36/ABCB1/SLC39A5/SLCO1B1/SLC25A10/SLC25A18/MFSD2A/CFTR/UCP2/SLC38A11/SLC27A2/SLC17A3/SLC3A1/SLC51A/SLC16A10/SLC16A12/SLC25A21/SLC16A9/SLC22A7/AKR1C4/SLC22A1/SLC38A3/SLC10A1/SLC26A3
BP	GO:0055086	nucleobase-containing small molecule metabolic process	479	-0.384708	-1.62374	4.41173e-06	0.000166429	0.000133017	2800	tags=33%, list=21%, signal=27%	ACMSD/CDADC1/SDHD/OARD1/NDUFV2/NADK2/NT5E/NT5C3A/HSD17B4/DUT/DTYMK/GMPR/PDK2/NUDT5/NDUFS2/PPARA/DNPH1/FMO5/TP53/OLA1/PRPSAP2/STOML2/DCTPP1/DNAJC30/ENTPD6/HPRT1/UPRT/ATP5F1A/NADK/PAPSS2/DLD/MMUT/NUDT9/EFL1/ACSM5/SULT1E1/UCKL1/ACSF2/PARK7/MPI/PAPSS1/NUDT12/FIS1/UCK2/MACROD1/NAXE/TKT/NUDT14/NUDT16/GPD1/RAN/ERH/ACACB/ATP5MC1/GMDS/PAICS/NANS/NTHL1/PPCDC/ATP5PB/AMPD3/TSPO/HSPA8/XDH/BPNT1/GLRX/BEND3/SDH…
CC	GO:0005819	spindle	369	-0.393012	-1.63108	1.98516e-05	0.000586304	0.000468597	2710	tags=24%, list=20%, signal=20%	IQCB1/ZW10/SLC25A5/RACGAP1/HAUS7/RASSF1/TTLL12/DCTN3/POC1B/ARL2BP/TUBG1/JTB/SMC6/DYNLT1/DCDC2/ABRAXAS2/UBXN2B/DYNLL1/MICAL3/MAPRE2/TERF1/CHMP2A/TBL1X/FBF1/MAP1S/RPS3/CEP128/CIAO2B/NUSAP1/SGF29/KIF20B/RTRAF/AURKC/NUDCD2/HAUS5/NPM1/KNSTRN/AGBL5/TUBB4B/FAM161A/ACOT13/AURKA/KIF18A/RSPH1/TUBB2A/NEDD9/CKAP2L/GPX2/KIF11/TUBB2B/BUB1B/DSN1/ESPL1/DCDC1/MTCL1/FIRRM/KATNAL2/PLEKHG6/CENPE/FAM83D/ODAM/PLK1/SNC…
BP	GO:0072521	purine-containing compound metabolic process	383	-0.391918	-1.63277	4.9078e-05	0.00120181	0.000960534	3569	tags=43%, list=27%, signal=32%	GUK1/FHIT/HAAO/ATP5MC2/PMVK/PDHB/MPP1/SDHC/ADAL/PPARGC1A/PGLS/ACSF3/NME5/MTOR/MVD/SLC25A16/ITPA/MCEE/NDUFA10/NDUFB8/MACROH2A1/HACD1/PDK1/NDUFS4/PDHX/ACSL1/RPE/NME4/NDUFC2/SUCLA2/ACSL3/PRTFDC1/SAMHD1/PDHA1/ACMSD/SDHD/OARD1/NDUFV2/NADK2/NT5E/HSD17B4/GMPR/PDK2/NUDT5/NDUFS2/PPARA/DNPH1/FMO5/TP53/OLA1/PRPSAP2/STOML2/DNAJC30/HPRT1/ATP5F1A/NADK/PAPSS2/DLD/MMUT/NUDT9/EFL1/ACSM5/SULT1E1/ACSF2/PAPSS1/NUDT1…
BP	GO:0042180	cellular ketone metabolic process	172	-0.429326	-1.64187	0.000691502	0.00969074	0.00774523	2041	tags=30%, list=15%, signal=25%	PARK7/PRKCE/COQ2/GPD1/OXCT1/UBIAD1/ACACB/CYP4F2/RGN/AKR1A1/SLC7A11/FABP5/PRKAG2/HSD17B10/NDUFA9/AKR7A2/AADAT/EIF6/PDK4/SLC7A7/SNCA/CYP4F11/CAV1/AKR1C2/NQO2/AKR1C3/ETFBKMT/HAGH/CBR1/AKR1C1/BHMT/COQ3/FABP1/CLCN2/PDSS1/ACADL/AFP/BRCA1/CYP2B6/FMO1/CYP17A1/MFSD2A/NQO1/HSD11B2/AKR1C4/AKR1B10/HSD17B6/SRD5A2/FGF19/APOC3/APOA5
BP	GO:0015711	organic anion transport	284	-0.408112	-1.64343	0.000130141	0.00271121	0.00216691	2042	tags=30%, list=15%, signal=26%	SLC16A4/SLC25A23/SFXN4/FOLR1/FIS1/SLC25A4/LLGL2/SLC27A5/CYB5RL/SLC6A14/PLIN2/GLTPD2/CYP4F2/SLC7A11/FABP5/SLC2A2/MTTP/MPC2/SFXN2/CPT2/EPRS1/BDKRB2/SLC23A3/SLC1A4/SLC7A7/ATP8B1/SNCA/SLC7A10/SLCO4A1/SLCO4C1/SLC17A1/SLC6A20/AKR1C1/SLC17A4/SLC25A19/ABCC2/SLCO2B1/SLC23A1/EDN1/FABP1/SLC25A15/SLC22A10/SLC7A9/ABCC4/SLC12A2/CD36/PLA2G12B/ABCB1/PROCA1/SLC39A5/SLCO1B1/CLTRN/SLC25A10/AQP9/PLA2G1B/MGST1/SLC17A…
CC	GO:0098862	cluster of actin-based cell projections	113	-0.456208	-1.64367	0.00186867	0.0209333	0.0167307	2013	tags=28%, list=15%, signal=24%	FOLR1/MYH14/LIMA1/MYO1B/VIL1/MYO3B/SLC7A11/SLC2A2/MTTP/ADGRV1/MME/MYL12B/ATP8B1/ENPEP/HSP90AA1/SLC17A4/SLC15A1/SLC7A9/CD36/DCXR/CLTRN/MYO7B/CLIC5/SLC28A1/NHERF4/SLC17A3/SLC3A1/MYO1A/SOAT2/ACE2/SLC26A3/SLC5A1
CC	GO:0019866	organelle inner membrane	455	-0.391614	-1.64622	3.40218e-06	0.000131548	0.000105138	3582	tags=46%, list=27%, signal=35%	LETMD1/COQ6/TIMM50/MICU2/ATP5MC2/SDHC/SLC25A35/HIGD1A/APOO/TMEM177/MRPS10/SFXN5/MRPL55/MRPL19/HCCS/SLC25A16/SAMM50/NDUFA10/GPD2/NDUFB8/PMPCA/BCS1L/RAB5IF/MRPL48/NDUFS4/GRPEL1/NDUFAF5/PPOX/NME4/NDUFC2/PMPCB/ABCB10/MRPS14/IMMT/MRPL3/LRPPRC/ABCB7/ADCK1/TOMM40/UQCRC1/MRPS28/MPC1/MRPL35/MRPL21/FLVCR1/SLC25A3/GADD45GIP1/MRPS6/HADHB/SLC25A20/SDHD/NDUFV2/MRPL10/FECH/NUTF2/COA1/SLC25A5/MRPS16/TIMMDC1/PTCD…
[truncated: 330 more rows]

## Sheet: S6_GSEA HEP_fibrotic_REACTOME
Supplementary Dataset 4_S6: GSEA enriched in Hepatocyte cells from fibrotic compared to healthy conditions. REACTOME pathways. Related to Fig.5 and Extended Data Fig.10. Filtered for p.adjust < 0.05.
[truncated: 167 more rows]

[truncated: 3 more sheets: S7_GSEA MSC_fibrotic_KEGG, S8_GSEA MSC_fibrotic_GO, S9_GSEA MSC_fibrotic_REACTOME]
