# Supplementary figures and images for: Human assembloids recapitulate periportal liver tissue in vitro
Source: Research Square preprint supplement (doi:10.21203/rs.3.rs-5314788/v1), 2025-09-17

### Extended Data Figure 8

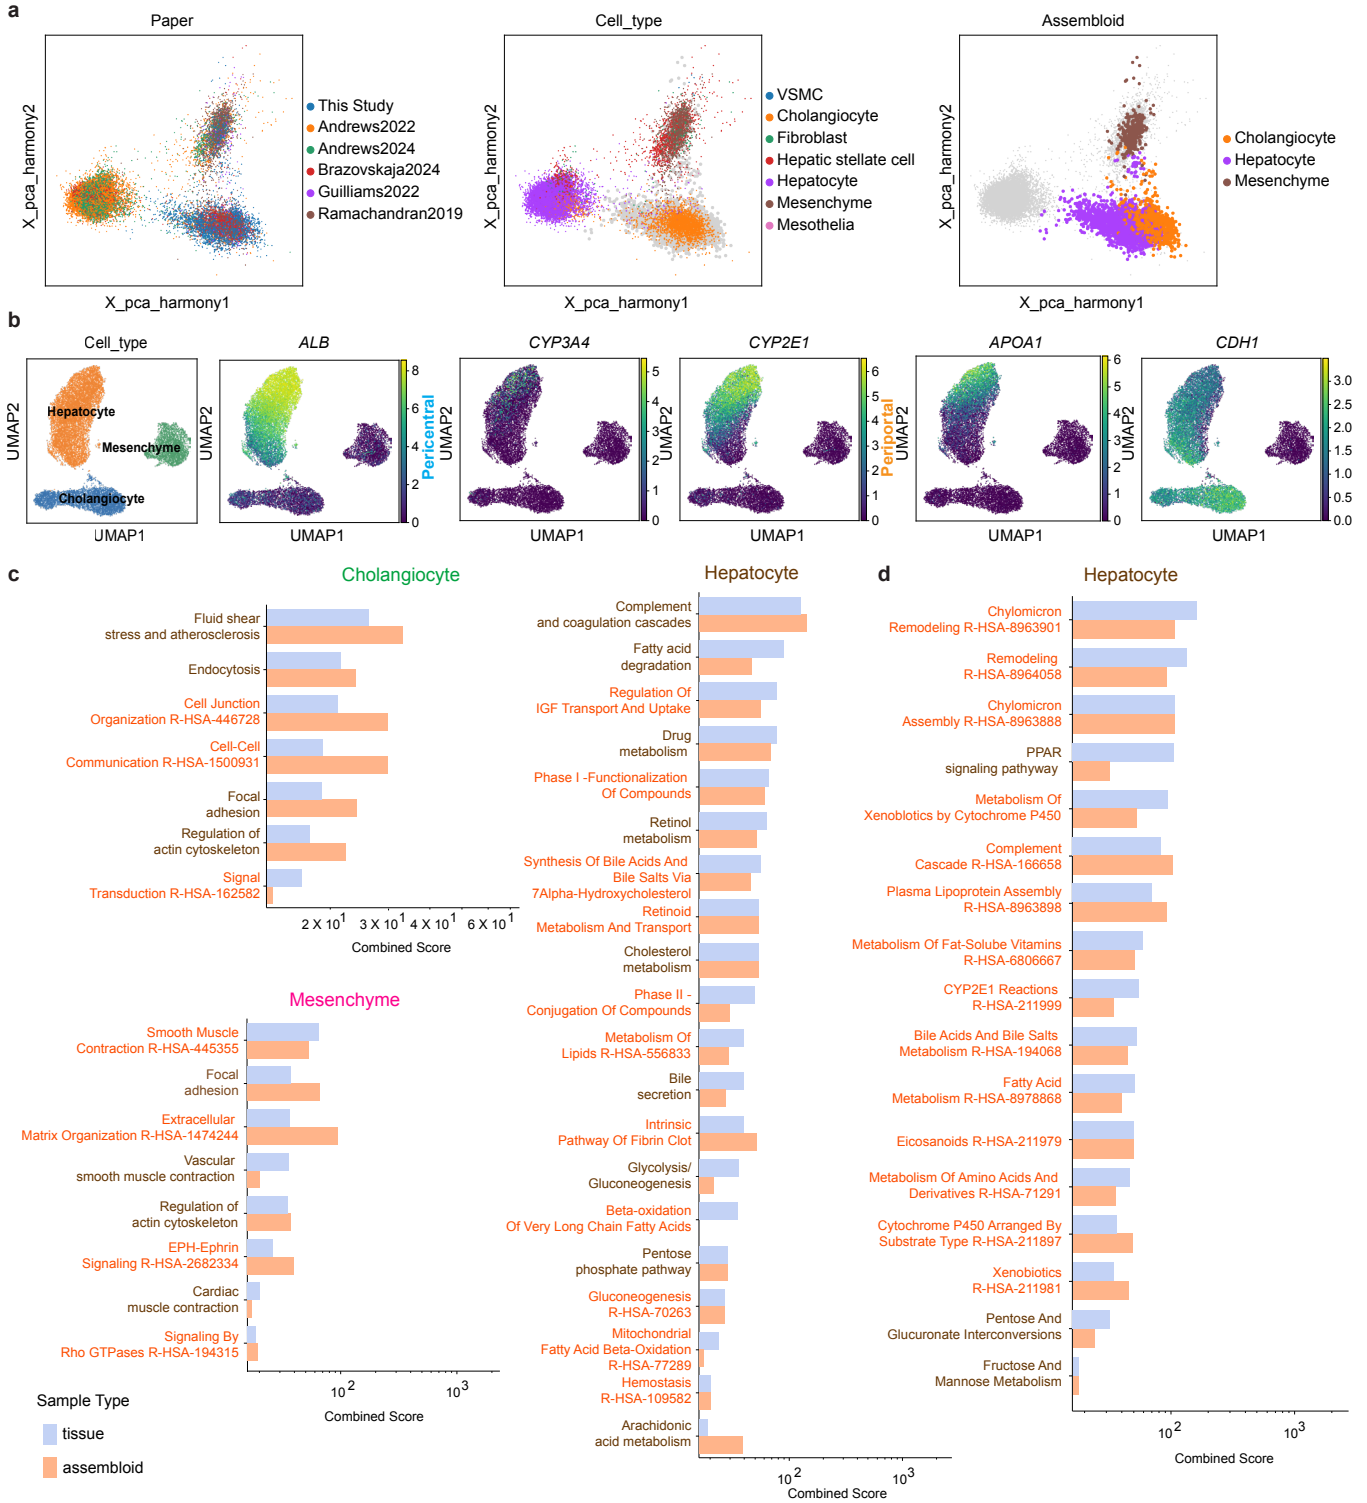

Supplement: Supplementary file 1 [file 9ab7fd1dee135fa9e54b4524.pdf]
